# Supplementary material for: Gli3 utilizes Hand2 to synergistically regulate tissue-specific transcriptional networks
Source: eLife. 2020 Oct 2;9:e56450. doi: 10.7554/eLife.56450 (PMC7556880; doi:10.7554/eLife.56450)
Supplement: Figure 1—source data 1. [file elife-56450-fig1-data1.xlsx]

## Sheet: Figure 1I and Supp. Figure 1
	MNP Length (TOP GRAPH)								Mandible length (BOTTOM GRAPH)
	Wild Type	Gli2/3 cKO	H2 cKO	Triple Het	Triple KO					Wild Type	Gli2/3 cKO	H2 cKO	Triple Het	Triple KO
Average	0.99	0.74	0.586667	0.7425	0.5975				Averages	5.66571	3.43333	2.73333	4.82833	2.055
StDev	0.0374166	0.128323	0.0757188	0.030957	0.0699405				StDev	0.202884	0.335122	0.220786	0.163391	0.22487
