# Supplementary material for: Gli3 utilizes Hand2 to synergistically regulate tissue-specific transcriptional networks
Source: eLife. 2020 Oct 2;9:e56450. doi: 10.7554/eLife.56450 (PMC7556880; doi:10.7554/eLife.56450)
Supplement: Figure 5—source data 1. [file elife-56450-fig5-data1.xlsx]

## Sheet: Figure 5
Fig. 5C
dGBM+Ebox	[Gli3DBD]
	0.0225	0.09	0.36	1.44
Average % Bound	0.001587	0.005779	0.024275	0.173541
StDev	0.000288	0.003026	0.00069	0.006381
cGBM+Ebox	[Gli3DBD]
	0.0225	0.09	0.36	1.44
Average % Bound	0.007857	0.028022	0.197791	0.603979
StDev	0.002177	0.003005	0.011885	0.015002
