# Supplementary material for: Gli3 utilizes Hand2 to synergistically regulate tissue-specific transcriptional networks
Source: eLife. 2020 Oct 2;9:e56450. doi: 10.7554/eLife.56450 (PMC7556880; doi:10.7554/eLife.56450)
Supplement: Figure 8—figure supplement 2—source data 1. [file elife-56450-fig8-figsupp2-data1.xlsx]

## Sheet: Figure 8-figure supplement 2
Figure 8-figure supplement 2B
Average			StDev
Control	1		Control	0
Hand2	2.47655		Hand2	0.58436
Gli3	1.61023		Gli3	0.58876
G3H2	5.40726		G3H2	1.65828
