# Supplementary material for: Gli3 utilizes Hand2 to synergistically regulate tissue-specific transcriptional networks
Source: eLife. 2020 Oct 2;9:e56450. doi: 10.7554/eLife.56450 (PMC7556880; doi:10.7554/eLife.56450)
Supplement: Figure 8—source data 1. [file elife-56450-fig8-data1.xlsx]

## Sheet: Figure 8
Fig. 8B						Fig. 8C
Averages			StDev			Averages			StDev
pGL3-pr	1		pGL3-pr	0		pGL3-pr	1		pGL3-pr	0
Div	1.37276		Div	0.2901		PP1	3.7817		P1	0.0107706
Div+g3	3.27583		Div+g3	0.39878		PP1+g3	6.16829		PP1+g3	0.136449
Div+h2	3.55109		Div+h2	0.58591		PP1+h2	7.84228		PP1+h2	0.0662656
Div+g3h2	7.68337		Div+g3h2	0.92791		PP1+g3h2	17.5958		PP1+g3h2	0.922909
can	1.2592		can	0.0633
can+g3	2.52601		can+g3	0.24205
can+h2	3.03712		can+h2	0.02994
can+g3h2	3.32744		can+g3h2	0.01102
Fig. 8D						Fig. 8E
Avg			StDev			Average			Stdev
pGL3-pr	1		pGL3-pr	0		pGL3 promoter	1		pGL3 promoter	0
4	2.12524		PP2	0.978905		1.2	1.92759		1.2	0.575468
PP2+g3	4.27144		PP2+g3	0.448441		37086+g3	4.78021		37086+g3	0.5914
PP2+h2	3.29197		PP2+h2	1.35615		37086+h2	4.27657		37085+h2	0.824686
PP2+g3h2	9.32463		PP2+g3h2	3.73554		37086+g3h2	11.7421		37086+g3h2	1.31054
