# Supplementary material for: Gli3 utilizes Hand2 to synergistically regulate tissue-specific transcriptional networks
Source: eLife. 2020 Oct 2;9:e56450. doi: 10.7554/eLife.56450 (PMC7556880; doi:10.7554/eLife.56450)
Supplement: Figure 9—figure supplement 1—source data 1. [file elife-56450-fig9-figsupp1-data1.xlsx]

## Sheet: Figure 9-figure supplement 1
Averages			StDev
pGL3-pr	1		pGL3-pr	0
37086+g3h2	12.3583		37086+g3h2	0.595904
mutEbox+g3	2.96634		mutEbox+g3	0.547936
mutEbox+h2	2.54337		mutEbox+h2	0.287618
mutEbox+g3h2	2.8769		mutEbox+g3h2	1.09904
mutGBR+g3	2.81946		mutGBR+g3	0.812555
mutGBR+h2	2.83794		mutGBR+h2	1.17469
mutGBR+g3h2	3.30313		mutGBR+g3h2	0.536269
