# Supplementary material for: Gli3 utilizes Hand2 to synergistically regulate tissue-specific transcriptional networks
Source: eLife. 2020 Oct 2;9:e56450. doi: 10.7554/eLife.56450 (PMC7556880; doi:10.7554/eLife.56450)
Supplement: Figure 9—source data 1. [file elife-56450-fig9-data1.xlsx]

## Sheet: Figure 9
Fig. 9A
Average			StDev
PP2 g3h2	9.60737		PP2 g3h2	1.00749
mutGBR+g3	1.18506		mutGBR+g3	0.207787
MutGBR+h2	1.02427		MutGBR+h2	0.512273
MutGBR+g3h2	0.935547		MutGBR+g3h2	0.536141
MutEbox+g3	1.72267		MutEbox+g3	0.552055
MutEbox+h2	2.73398		MutEbox+h2	0.434116
MutEbox+g3h2	2.44438		MutEbox+g3h2	0.701799
Fig. 9D							Fig. 9E
PP2	[Gli3DBD]						Averages			StDev
	0.0225	0.09	0.36	1.44			pGL3-pr	1		0
Average % Bound	0.006864	0.0248	0.101686	0.516314			D to C	2.5109		0.259672
StDev	0.00503	0.00638	0.005348	0.010135			D to C +g3	10.1392		1.01834
							D to C +h2	11.479		1.62746
							D to C +g3h2	18.0012		1.60555
PP2 T>A	[Gli3DBD]
	0.0225	0.09	0.36	1.44
Average % Bound	0.011079	0.095236	0.325965	0.768221
StDev	0.004619	0.029332	0.026424	0.005502
