# Supplementary material for: Gli3 utilizes Hand2 to synergistically regulate tissue-specific transcriptional networks
Source: eLife journal article supplement (doi:10.7554/elife.56450), 2020-10-02
Supplement: supp [file elife-56450-supp-v1.zip]

Elliott\_Figure 7-figure supplement 1

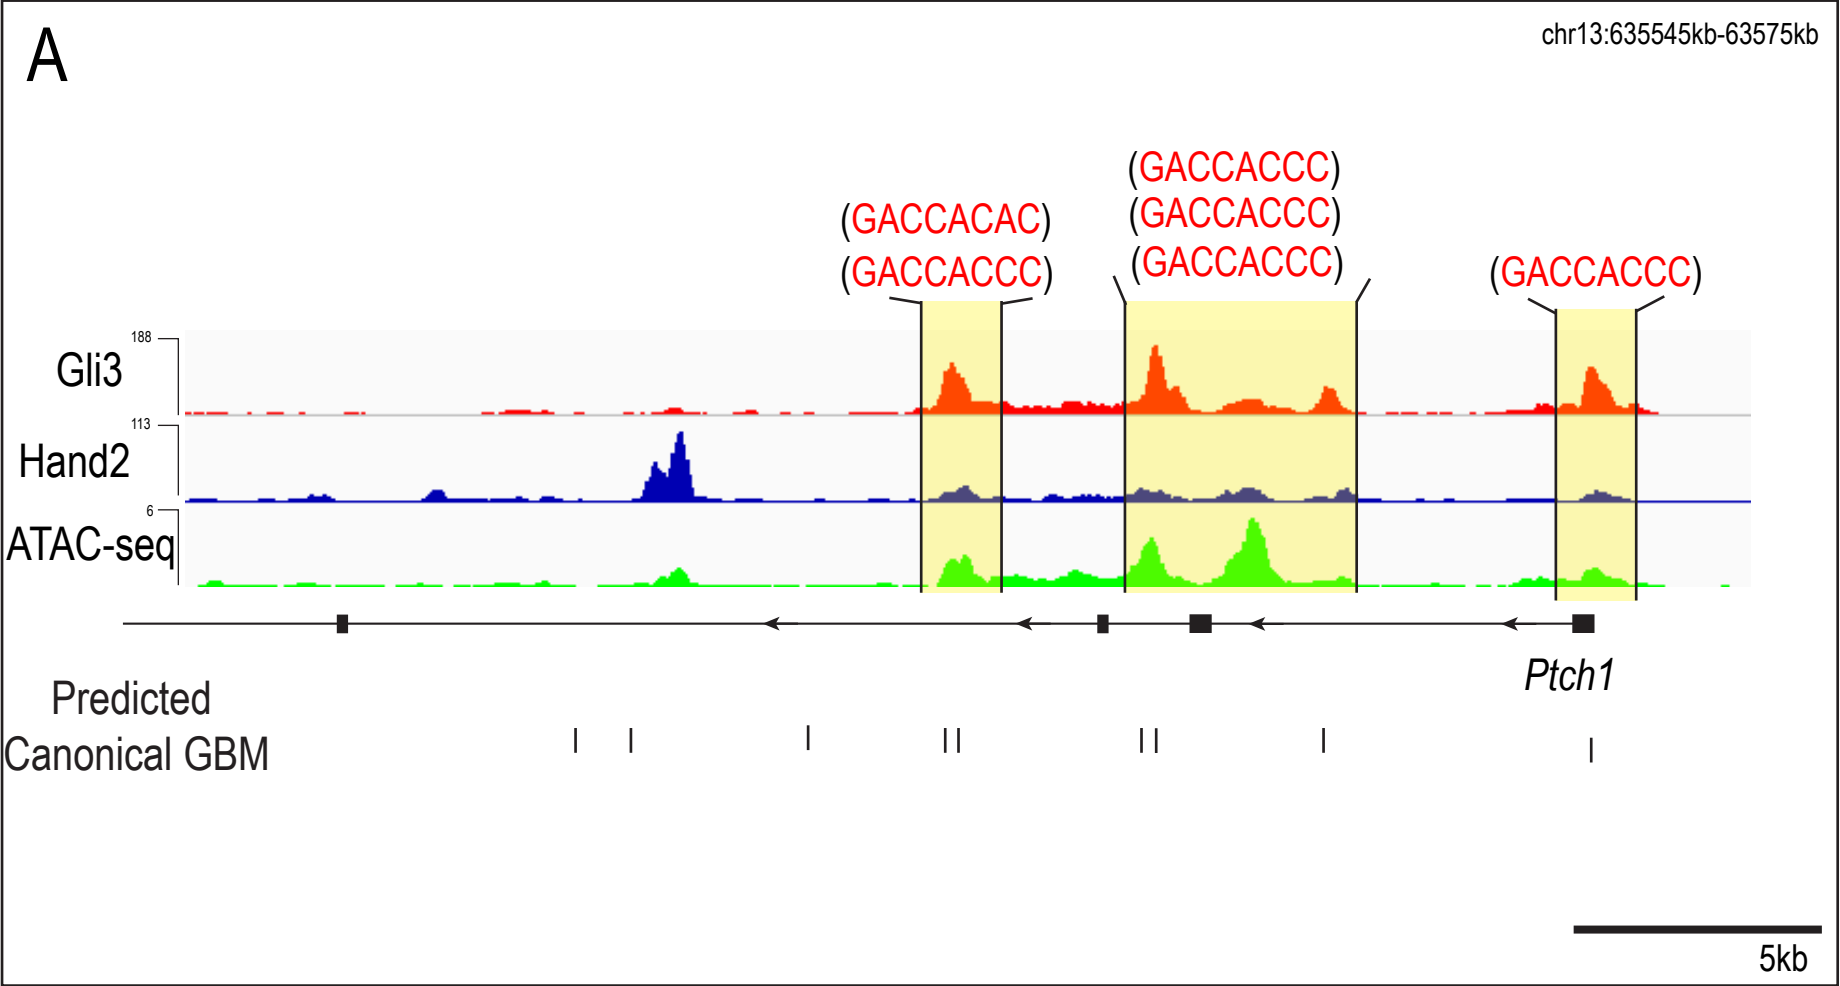

**B**

| E11.5 NCCs      | % <i>Gli3</i> + | % <i>Hand2</i> + | % <i>Ptch1</i> - |
|-----------------|-----------------|------------------|------------------|
| <i>Ptch1</i> +  | 18%             | 41%              | 0%               |
| <i>Foxd1</i> +  | 13%             | 50%              | 70%              |
| <i>Plagl1</i> + | 17%             | 49%              | 85%              |
| <i>Myh6</i> +   | 20%             | 40%              | 100%             |
| <i>Maf</i> +    | 17%             | 29%              | 83%              |
