# Supplementary material for: Gli3 utilizes Hand2 to synergistically regulate tissue-specific transcriptional networks
Source: eLife. 2020 Oct 2;9:e56450. doi: 10.7554/eLife.56450 (PMC7556880; doi:10.7554/eLife.56450)
Supplement: Supplementary file 2. [file elife-56450-supp2.xlsx]

## Sheet: Gli3 only
Raw	BPs	Value
CCGCCGCC 0.255156	CCGCCGCC	0.255156
GCCGCCGC 0.244125	GCCGCCGC	0.244125
CCCCGCCC 0.242206	CCCCGCCC	0.242206
CCCGCCCC 0.232134	CCCGCCCC	0.232134
CCCCTCCC 0.216787	CCCCTCCC	0.216787
CGCCGCCG 0.214868	CGCCGCCG	0.214868
CCCTCCCC 0.214868	CCCTCCCC	0.214868
CCCGCCGC 0.203357	CCCGCCGC	0.203357
GCCCCGCC 0.197602	GCCCCGCC	0.197602
CCCGGCCC 0.18753	CCCGGCCC	0.18753
CCGCCCGC 0.186571	CCGCCCGC	0.186571
CCGCCCCC 0.184652	CCGCCCCC	0.184652
CCTCCTCC 0.182254	CCTCCTCC	0.182254
CCTCCCCC 0.181295	CCTCCCCC	0.181295
CCCGCGCC 0.181295	CCCGCGCC	0.181295
CCGCGGCC 0.179856	CCGCGGCC	0.179856
CGCCGCCC 0.177458	CGCCGCCC	0.177458
CGGCGGCC 0.176499	CGGCGGCC	0.176499
CGGCCGCC 0.172662	CGGCCGCC	0.172662
CCCGGGCC 0.172662	CCCGGGCC	0.172662
GCGGGGCC 0.171703	GCGGGGCC	0.171703
CGCCCGCC 0.171223	CGCCCGCC	0.171223
GCCCGGCC 0.170264	GCCCGGCC	0.170264
GCGCCGCC 0.168345	GCGCCGCC	0.168345
CGCCCCGC 0.167386	CGCCCCGC	0.167386
CCGCCCCG 0.165947	CCGCCCCG	0.165947
CCGCGCCC 0.163549	CCGCGCCC	0.163549
CCCGGGGC 0.16307	CCCGGGGC	0.16307
CCGCCGCG 0.16259	CCGCCGCG	0.16259
CCGCCTCC 0.161151	CCGCCTCC	0.161151
CCCCCTCC 0.159712	CCCCCTCC	0.159712
GACCACCC 0.159712	GACCACCC	0.159712
CCCACCCC 0.158273	CCCACCCC	0.158273
CCCGCCCG 0.157314	CCCGCCCG	0.157314
CCCCACCC 0.156835	CCCCACCC	0.156835
GCGCGGCC 0.156835	GCGCGGCC	0.156835
GCCGGGCC 0.156355	GCCGGGCC	0.156355
GCCCGCCC 0.155875	GCCCGCCC	0.155875
CCTCCGCC 0.154916	CCTCCGCC	0.154916
CCCGCGGC 0.154916	CCCGCGGC	0.154916
CCCCCGCC 0.152038	CCCCCGCC	0.152038
CCGCGGCG 0.152038	CCGCGGCG	0.152038
ACCACCCA 0.151559	ACCACCCA	0.151559
CGCGGGGC 0.151559	CGCGGGGC	0.151559
CGGCCCCG 0.151079	CGGCCCCG	0.151079
CCCCGCCG 0.1506	CCCCGCCG	0.1506
CCGGGGCC 0.15012	CCGGGGCC	0.15012
CTCCCTCC 0.15012	CTCCCTCC	0.15012
CCGGCCGC 0.148681	CCGGCCGC	0.148681							0.33
GCCCGCGC 0.148681	GCCCGCGC	0.148681
CCCCGGCC 0.148201	CCCCGGCC	0.148201
GCCGCCCC 0.148201	GCCGCCCC	0.148201
CCGCGCGC 0.148201	CCGCGCGC	0.148201
CCCCGCGC 0.147722	CCCCGCGC	0.147722
CGGGCGGC 0.147722	CGGGCGGC	0.147722
CGGGCCGC 0.147242	CGGGCCGC	0.147242
CCACCCAC 0.147242	CCACCCAC	0.147242
CCGGGCCG 0.146283	CCGGGCCG	0.146283
CGCCGCGC 0.144844	CGCCGCGC	0.144844
CTCCTCCC 0.143885	CTCCTCCC	0.143885
CCACCCAG 0.143405	CCACCCAG	0.143405
CGCGCCGC 0.142926	CGCGCCGC	0.142926
CCTCCCGC 0.142446	CCTCCCGC	0.142446
GCCCCGGC 0.142446	GCCCCGGC	0.142446
CGCGGCCC 0.141487	CGCGGCCC	0.141487
CCCAGCCC 0.141007	CCCAGCCC	0.141007
CCTCCCTC 0.140528	CCTCCCTC	0.140528
CCGCGCCG 0.140528	CCGCGCCG	0.140528
CCGCCCGG 0.140048	CCGCCCGG	0.140048
CCCCGGGC 0.139568	CCCCGGGC	0.139568
CCGGGCCC 0.139089	CCGGGCCC	0.139089
CGGCGGGC 0.138129	CGGCGGGC	0.138129
CCGGCGGC 0.138129	CCGGCGGC	0.138129
CCCCCACC 0.13717	CCCCCACC	0.13717
GCGGCGCC 0.13717	GCGGCGCC	0.13717
CCGGCCCC 0.13717	CCGGCCCC	0.13717
GCCGCGCC 0.135731	GCCGCGCC	0.135731
CGCGCGGC 0.135252	CGCGCGGC	0.135252
GGCCGCCC 0.135252	GGCCGCCC	0.135252
GGCGGGGA 0.135252	GGCGGGGA	0.135252
CCCGGCGC 0.134772	CCCGGCGC	0.134772
CGCGCCCC 0.134293	CGCGCCCC	0.134293
CGCGGCCG 0.134293	CGCGGCCG	0.134293
GAGGCGGC 0.134293	GAGGCGGC	0.134293
CGGCCCGC 0.133333	CGGCCCGC	0.133333
CCGGCCCG 0.133333	CCGGCCCG	0.133333
CCCGGAGC 0.132854	CCCGGAGC	0.132854
CCGGGGCG 0.132374	CCGGGGCG	0.132374
CTCCCGCC 0.132374	CTCCCGCC	0.132374
CCGCAGCC 0.132374	CCGCAGCC	0.132374
CTCCGCCC 0.131894	CTCCGCCC	0.131894
GGAGGGGA 0.131894	GGAGGGGA	0.131894
CGCCCCCG 0.131415	CGCCCCCG	0.131415
CGCCCGGC 0.130935	CGCCCGGC	0.130935
CCCGGCCG 0.130935	CCCGGCCG	0.130935
CCCTCCTC 0.130456	CCCTCCTC	0.130456
CGCCGCCA 0.129976	CGCCGCCA	0.129976
CGCCTCCC 0.129976	CGCCTCCC	0.129976
CGGCCTCC 0.129976	CGGCCTCC	0.129976
CCCCGCGG 0.129017	CCCCGCGG	0.129017							#DIV/0!
CGCGGCGC 0.129017	CGCGGCGC	0.129017
AGCGGCGG 0.129017	AGCGGCGG	0.129017
GCCCCTCC 0.129017	GCCCCTCC	0.129017
CCGGAGCC 0.128537	CCGGAGCC	0.128537
CTCCCCGC 0.128537	CTCCCCGC	0.128537
CCCTCCGC 0.128537	CCCTCCGC	0.128537
CGGGGCGC 0.128058	CGGGGCGC	0.128058
GCCCCCGC 0.128058	GCCCCCGC	0.128058
CGCCCGCG 0.127098	CGCCCGCG	0.127098
CCGGGAGG 0.126619	CCGGGAGG	0.126619
AGGGAGGG 0.126619	AGGGAGGG	0.126619
GGGAGGGA 0.126139	GGGAGGGA	0.126139
CGCGCGCC 0.125659	CGCGCGCC	0.125659
CCCCAGCC 0.12518	CCCCAGCC	0.12518
GCGGAGCC 0.12518	GCGGAGCC	0.12518
CGCCGGGC 0.1247	CGCCGGGC	0.1247
CCCGGCGG 0.1247	CCCGGCGG	0.1247
CCCAGGCC 0.124221	CCCAGGCC	0.124221
CCACCCCC 0.124221	CCACCCCC	0.124221
GCGGCTCC 0.123741	GCGGCTCC	0.123741
CGCGGGCC 0.123261	CGCGGGCC	0.123261
CCTCCCCG 0.123261	CCTCCCCG	0.123261
GCGCCCGC 0.123261	GCGCCCGC	0.123261
AGGGGCGG 0.123261	AGGGGCGG	0.123261
CCGGCTCC 0.122782	CCGGCTCC	0.122782
GCCCTCCC 0.121823	GCCCTCCC	0.121823
GCCGCAGC 0.121823	GCCGCAGC	0.121823
GGCGGCCC 0.121823	GGCGGCCC	0.121823
GCGGCCCC 0.121343	GCGGCCCC	0.121343
CGGCGCCC 0.121343	CGGCGCCC	0.121343
CCCGGGAG 0.121343	CCCGGGAG	0.121343
GAGGAGGA 0.120863	GAGGAGGA	0.120863
GCGCCCCC 0.120384	GCGCCCCC	0.120384
CCGCCCTC 0.120384	CCGCCCTC	0.120384
CCGCGGGC 0.120384	CCGCGGGC	0.120384
CGCCCTCC 0.119904	CGCCCTCC	0.119904
CCGGGAGC 0.119904	CCGGGAGC	0.119904
CGCCGGCC 0.119424	CGCCGGCC	0.119424
CTCCCGGC 0.119424	CTCCCGGC	0.119424
CGCGCCCG 0.118945	CGCGCCCG	0.118945
CCGAGGCC 0.118465	CCGAGGCC	0.118465
CGGAGCCC 0.117986	CGGAGCCC	0.117986
CCCGGCTC 0.117986	CCCGGCTC	0.117986
AGGCGGCG 0.117506	AGGCGGCG	0.117506
CCCGCAGC 0.117506	CCCGCAGC	0.117506
CGGGGCCC 0.117026	CGGGGCCC	0.117026
CGCCCCTC 0.116067	CGCCCCTC	0.116067
GCCGCGGC 0.116067	GCCGCGGC	0.116067
CCAGGCCC 0.115588	CCAGGCCC	0.115588
CGGGAGGC 0.115588	CGGGAGGC	0.115588
CCCGCCTC 0.115588	CCCGCCTC	0.115588
CCTCTCCC 0.115108	CCTCTCCC	0.115108
GCGGCCGC 0.114628	GCGGCCGC	0.114628
CCGGGCTC 0.114149	CCGGGCTC	0.114149
GCAGCGGC 0.114149	GCAGCGGC	0.114149
CCCGCGCG 0.114149	CCCGCGCG	0.114149
CCCGGGCG 0.114149	CCCGGGCG	0.114149
AGGGGGCG 0.114149	AGGGGGCG	0.114149
GCGCGCCC 0.113669	GCGCGCCC	0.113669
GCGGGAGC 0.113669	GCGGGAGC	0.113669
GCAGCAGC 0.113669	GCAGCAGC	0.113669
GCAGCCCC 0.113669	GCAGCCCC	0.113669
CCCGCCGG 0.113669	CCCGCCGG	0.113669
GCGGCAGC 0.113189	GCGGCAGC	0.113189
GCTCCGCC 0.113189	GCTCCGCC	0.113189
GGCCTCCC 0.113189	GGCCTCCC	0.113189
GGGCGGGA 0.11271	GGGCGGGA	0.11271
CCTCGGCC 0.11271	CCTCGGCC	0.11271
GCCTCCGC 0.11271	GCCTCCGC	0.11271
CCGCCACC 0.11271	CCGCCACC	0.11271
CAGCCCCG 0.11271	CAGCCCCG	0.11271
CGGAGCCG 0.11223	CGGAGCCG	0.11223
CCGCTCCC 0.11223	CCGCTCCC	0.11223
CCGGGCGC 0.110791	CCGGGCGC	0.110791
CCGCTGCC 0.110791	CCGCTGCC	0.110791
GCGGGGAC 0.110312	GCGGGGAC	0.110312
GAGGGGGC 0.110312	GAGGGGGC	0.110312
CCCCGGCG 0.109832	CCCCGGCG	0.109832
GCCCACCC 0.109832	GCCCACCC	0.109832
GCCTCCCC 0.109832	GCCTCCCC	0.109832
CCCGCTCC 0.109832	CCCGCTCC	0.109832
GGCCCGCC 0.109353	GGCCCGCC	0.109353
CCGGCGCC 0.108873	CCGGCGCC	0.108873
GCCCAGCC 0.108393	GCCCAGCC	0.108393
GCCCGGGA 0.108393	GCCCGGGA	0.108393
CCGCCGGC 0.108393	CCGCCGGC	0.108393
CGGGCTCC 0.107914	CGGGCTCC	0.107914
CCGGCGCG 0.107914	CCGGCGCG	0.107914
CCCTCCCG 0.107914	CCCTCCCG	0.107914
CCCTTCCC 0.107914	CCCTTCCC	0.107914
CGGCTCCC 0.107434	CGGCTCCC	0.107434
CCGGCCTC 0.107434	CCGGCCTC	0.107434
GCAGCCGC 0.107434	GCAGCCGC	0.107434
CTTCCTCC 0.107434	CTTCCTCC	0.107434
AGGAGGAG 0.107434	AGGAGGAG	0.107434
GGCCACCC 0.107434	GGCCACCC	0.107434
GAGGCCGC 0.107434	GAGGCCGC	0.107434
AGCCCCGC 0.106954	AGCCCCGC	0.106954
GCCCAGGC 0.106954	GCCCAGGC	0.106954
AGGCCGCG 0.106954	AGGCCGCG	0.106954
GGCCGGGA 0.106954	GGCCGGGA	0.106954
CTGCCGCC 0.106475	CTGCCGCC	0.106475
CTCCGCGC 0.105995	CTCCGCGC	0.105995
GCCGCCAC 0.105995	GCCGCCAC	0.105995
GCCGGAGC 0.105995	GCCGGAGC	0.105995
CCCCTTCC 0.105516	CCCCTTCC	0.105516
CGCGCTCC 0.105516	CGCGCTCC	0.105516
CTCCGGGC 0.105516	CTCCGGGC	0.105516
CAGCCCGG 0.105036	CAGCCCGG	0.105036
CTGCGGCC 0.104556	CTGCGGCC	0.104556
CGGGGAGC 0.104556	CGGGGAGC	0.104556
CCCGGAGG 0.104556	CCCGGAGG	0.104556
AGGGGAGG 0.104556	AGGGGAGG	0.104556
GCTCCTCC 0.104077	GCTCCTCC	0.104077
CGCAGCCC 0.104077	CGCAGCCC	0.104077
CCGGGGAG 0.104077	CCGGGGAG	0.104077
AGCCCCGG 0.104077	AGCCCCGG	0.104077
AGCCGCCG 0.104077	AGCCGCCG	0.104077
CTCCCCTC 0.104077	CTCCCCTC	0.104077
GAGGAGGC 0.104077	GAGGAGGC	0.104077
CAGCCGCC 0.103597	CAGCCGCC	0.103597
CGGCCGGC 0.103118	CGGCCGGC	0.103118
CTCCGGCC 0.103118	CTCCGGCC	0.103118
CGGGCCCC 0.102638	CGGGCCCC	0.102638
AGGCCCGG 0.102638	AGGCCCGG	0.102638
GGGGAGGA 0.102158	GGGGAGGA	0.102158
AGGCCGGG 0.102158	AGGCCGGG	0.102158
CAGCCCGC 0.102158	CAGCCCGC	0.102158
CCCCCGGG 0.101679	CCCCCGGG	0.101679
CCGCGCTC 0.101679	CCGCGCTC	0.101679
CGCCCCCC 0.101199	CGCCCCCC	0.101199
CGGGAGCC 0.101199	CGGGAGCC	0.101199
CCAGCCCC 0.101199	CCAGCCCC	0.101199
AGCCCGGG 0.101199	AGCCCGGG	0.101199
GCCGCTCC 0.101199	GCCGCTCC	0.101199
CGGGCGCC 0.100719	CGGGCGCC	0.100719
CGGGCTGC 0.100719	CGGGCTGC	0.100719
CCCGGGAC 0.100719	CCCGGGAC	0.100719
CCGGGGGC 0.10024	CCGGGGGC	0.10024
AGCCCGGC 0.10024	AGCCCGGC	0.10024
GCCAGGCC 0.10024	GCCAGGCC	0.10024
GGACCACC 0.10024	GGACCACC	0.10024
CCCGAGCC 0.0997602	CCCGAGCC	0.0997602
CGCTCGCC 0.0997602	CGCTCGCC	0.0997602
CCTCCCAG 0.0997602	CCTCCCAG	0.0997602
CCTCTGCC 0.0997602	CCTCTGCC	0.0997602
GCCGAGCC 0.0997602	GCCGAGCC	0.0997602
CTGCCTCC 0.0992806	CTGCCTCC	0.0992806
CCGGCTGC 0.0992806	CCGGCTGC	0.0992806
CCTCCGCG 0.0992806	CCTCCGCG	0.0992806
GCCGGCGC 0.0992806	GCCGGCGC	0.0992806
GGCGCCCC 0.0992806	GGCGCCCC	0.0992806
GCGGCGGA 0.098801	GCGGCGGA	0.098801
CGGAGGCC 0.098801	CGGAGGCC	0.098801
CGGCGCGC 0.098801	CGGCGCGC	0.098801
CGGCGGAG 0.098801	CGGCGGAG	0.098801
GCAGCGCC 0.098801	GCAGCGCC	0.098801
AGACCACC 0.098801	AGACCACC	0.098801
CCCTGCCC 0.098801	CCCTGCCC	0.098801
CCGCTCCG 0.098801	CCGCTCCG	0.098801
CCCAGGGC 0.0983213	CCCAGGGC	0.0983213
GCTCGGCC 0.0983213	GCTCGGCC	0.0983213
CCCCGGAG 0.0978417	CCCCGGAG	0.0978417
CGCCGCTC 0.0978417	CGCCGCTC	0.0978417
CGCGGAGC 0.0978417	CGCGGAGC	0.0978417
GCCGAGGC 0.0978417	GCCGAGGC	0.0978417
GCGCCTCC 0.0978417	GCGCCTCC	0.0978417
CAGCCTCC 0.0978417	CAGCCTCC	0.0978417
CGCGGGAG 0.0973621	CGCGGGAG	0.0973621
CCAGCCCG 0.0973621	CCAGCCCG	0.0973621
GGGGACCC 0.0968825	GGGGACCC	0.0968825
CGGGGACC 0.0968825	CGGGGACC	0.0968825
CGGGGCTC 0.0968825	CGGGGCTC	0.0968825
GAGCCGCC 0.0968825	GAGCCGCC	0.0968825
CCACCGCC 0.0964029	CCACCGCC	0.0964029
CTCCAGCC 0.0964029	CTCCAGCC	0.0964029
AGGAGGGG 0.0964029	AGGAGGGG	0.0964029
CCTGCCTC 0.0964029	CCTGCCTC	0.0964029
CCAGCTCC 0.0959233	CCAGCTCC	0.0959233
GCTCGCCC 0.0959233	GCTCGCCC	0.0959233
AGGGCGGG 0.0959233	AGGGCGGG	0.0959233
CCTTCCCC 0.0959233	CCTTCCCC	0.0959233
CTGCAGCC 0.0954436	CTGCAGCC	0.0954436
CCCAGCTC 0.094964	CCCAGCTC	0.094964
CACACACA 0.094964	CACACACA	0.094964
CCGGAGGC 0.094964	CCGGAGGC	0.094964
CCGAGCCC 0.094964	CCGAGCCC	0.094964
CCGCGGAG 0.094964	CCGCGGAG	0.094964
CCTTCCTC 0.094964	CCTTCCTC	0.094964
CGCGGGGA 0.0944844	CGCGGGGA	0.0944844
AGCCGGGC 0.0944844	AGCCGGGC	0.0944844
CCCACCCA 0.0940048	CCCACCCA	0.0940048
CGGAGGAG 0.0940048	CGGAGGAG	0.0940048
GCCACCCA 0.0940048	GCCACCCA	0.0940048
GCCACCGC 0.0940048	GCCACCGC	0.0940048
GCCGGCCC 0.0940048	GCCGGCCC	0.0940048
GGGGCGGA 0.0935252	GGGGCGGA	0.0935252
CCCGGGGA 0.0935252	CCCGGGGA	0.0935252
GAGCGCGC 0.0935252	GAGCGCGC	0.0935252
CGGCCACC 0.0930456	CGGCCACC	0.0930456
CCTCAGCC 0.0930456	CCTCAGCC	0.0930456
CTCGCCGC 0.0930456	CTCGCCGC	0.0930456
GCCAGGGC 0.0930456	GCCAGGGC	0.0930456
GGAGCCCC 0.0930456	GGAGCCCC	0.0930456
CAGCAGCC 0.0930456	CAGCAGCC	0.0930456
CCCCCAGC 0.0925659	CCCCCAGC	0.0925659
CAGGCCGC 0.0925659	CAGGCCGC	0.0925659
CCTGGGCC 0.0925659	CCTGGGCC	0.0925659
CCCCCGGC 0.0920863	CCCCCGGC	0.0920863
GCTGGGCC 0.0920863	GCTGGGCC	0.0920863
CCAGCAGC 0.0920863	CCAGCAGC	0.0920863
CCCTCTCC 0.0916067	CCCTCTCC	0.0916067
CAGGCCCG 0.0916067	CAGGCCCG	0.0916067
CGCGGCTC 0.0911271	CGCGGCTC	0.0911271
CGCTCCGC 0.0911271	CGCTCCGC	0.0911271
CCACCCGG 0.0911271	CCACCCGG	0.0911271
CCAGGGCC 0.0906475	CCAGGGCC	0.0906475
CGGCGGGA 0.0906475	CGGCGGGA	0.0906475
CTCGGCCC 0.0906475	CTCGGCCC	0.0906475
GCGGGCCC 0.0901679	GCGGGCCC	0.0901679
AGAGGAGG 0.0901679	AGAGGAGG	0.0901679
CCAGCCTC 0.0901679	CCAGCCTC	0.0901679
AGGCGGGG 0.0901679	AGGCGGGG	0.0901679
GGCGGCCA 0.0901679	GGCGGCCA	0.0901679
CCCCCGCG 0.0896882	CCCCCGCG	0.0896882
GCGGAGGA 0.0896882	GCGGAGGA	0.0896882
GGGACCCC 0.0896882	GGGACCCC	0.0896882
CCACCTCC 0.0896882	CCACCTCC	0.0896882
CAGCGGCG 0.0896882	CAGCGGCG	0.0896882
CCTGCCCC 0.0896882	CCTGCCCC	0.0896882
CCAGGCCG 0.0892086	CCAGGCCG	0.0892086
CCCCGGGA 0.0892086	CCCCGGGA	0.0892086
GCTGCTCC 0.0892086	GCTGCTCC	0.0892086
CGAGGCCG 0.0892086	CGAGGCCG	0.0892086
GGCGGCGA 0.0892086	GGCGGCGA	0.0892086
CCCCCCAC 0.088729	CCCCCCAC	0.088729
GGGAGCCC 0.088729	GGGAGCCC	0.088729
CGCAGCCG 0.088729	CGCAGCCG	0.088729
CGCCCACC 0.088729	CGCCCACC	0.088729
CGCCTCCG 0.088729	CGCCTCCG	0.088729
CCGGGGAC 0.088729	CCGGGGAC	0.088729
GCAGAGGC 0.088729	GCAGAGGC	0.088729
CTCCCCCA 0.088729	CTCCCCCA	0.088729
CTCCCCCC 0.088729	CTCCCCCC	0.088729
CTCCGCTC 0.088729	CTCCGCTC	0.088729
CCCTGGCC 0.088729	CCCTGGCC	0.088729
GCGGCCAC 0.0882494	GCGGCCAC	0.0882494
GGCTCCCC 0.0882494	GGCTCCCC	0.0882494
CGGGGCAG 0.0882494	CGGGGCAG	0.0882494
AGCGCGGG 0.0882494	AGCGCGGG	0.0882494
GCCCTGCC 0.0882494	GCCCTGCC	0.0882494
GCCTGCGC 0.0882494	GCCTGCGC	0.0882494
GCCTGGCC 0.0882494	GCCTGGCC	0.0882494
CAGCCGGG 0.0882494	CAGCCGGG	0.0882494
AGGCTGGG 0.0882494	AGGCTGGG	0.0882494
CCCGAGGC 0.0877698	CCCGAGGC	0.0877698
CCGGAGCG 0.0877698	CCGGAGCG	0.0877698
CTCCTTCC 0.0877698	CTCCTTCC	0.0877698
CCGCCCAC 0.0877698	CCGCCCAC	0.0877698
CCCCAGGC 0.0872902	CCCCAGGC	0.0872902
CGCTCCCC 0.0872902	CGCTCCCC	0.0872902
CTCCCACC 0.0872902	CTCCCACC	0.0872902
CTCGGGCC 0.0872902	CTCGGGCC	0.0872902
GCGCAGCC 0.0872902	GCGCAGCC	0.0872902
CAGCCTGG 0.0872902	CAGCCTGG	0.0872902
CAGGCTGG 0.0872902	CAGGCTGG	0.0872902
CCTGGCCC 0.0872902	CCTGGCCC	0.0872902
CTGCGGGC 0.0868106	CTGCGGGC	0.0868106
CTGCTCCC 0.0868106	CTGCTCCC	0.0868106
ATGGCGGC 0.0868106	ATGGCGGC	0.0868106
CCTCCCAC 0.0868106	CCTCCCAC	0.0868106
CCTCCGGC 0.0868106	CCTCCGGC	0.0868106
CTCCCAGC 0.0868106	CTCCCAGC	0.0868106
GCGAGGCC 0.0868106	GCGAGGCC	0.0868106
CCGAGCCG 0.0868106	CCGAGCCG	0.0868106
CCGCCCAG 0.0868106	CCGCCCAG	0.0868106
AGGGGGAG 0.0868106	AGGGGGAG	0.0868106
CGCAGGCC 0.0863309	CGCAGGCC	0.0863309
CGCCGAGC 0.0863309	CGCCGAGC	0.0863309
CCTCCTGC 0.0863309	CCTCCTGC	0.0863309
GCCCGGGC 0.0863309	GCCCGGGC	0.0863309
GCCGGGGA 0.0863309	GCCGGGGA	0.0863309
GAGCCCGC 0.0863309	GAGCCCGC	0.0863309
CGGAGCGC 0.0858513	CGGAGCGC	0.0858513
CCGGGACC 0.0858513	CCGGGACC	0.0858513
CAGCTCCC 0.0858513	CAGCTCCC	0.0858513
CCTGCTCC 0.0858513	CCTGCTCC	0.0858513
GAGGGGGA 0.0858513	GAGGGGGA	0.0858513
CCCCGAGC 0.0853717	CCCCGAGC	0.0853717
AGCCCGCG 0.0853717	AGCCCGCG	0.0853717
AGGAGGCG 0.0853717	AGGAGGCG	0.0853717
CACCCACC 0.0848921	CACCCACC	0.0848921
GCAGCTCC 0.0848921	GCAGCTCC	0.0848921
CCGCTCGC 0.0848921	CCGCTCGC	0.0848921
CCCCGCAG 0.0844125	CCCCGCAG	0.0844125
CGCGCCTC 0.0844125	CGCGCCTC	0.0844125
CCACCCCG 0.0844125	CCACCCCG	0.0844125
CTCGGGGC 0.0844125	CTCGGGGC	0.0844125
GGCAGCCC 0.0844125	GGCAGCCC	0.0844125
CCTGGGGC 0.0844125	CCTGGGGC	0.0844125
GAGGCTGC 0.0844125	GAGGCTGC	0.0844125
GAGGGAGA 0.0844125	GAGGGAGA	0.0844125
AAAAAAAA 0.0839329	AAAAAAAA	0.0839329
CGCTGCCC 0.0839329	CGCTGCCC	0.0839329
CCTCCCCA 0.0839329	CCTCCCCA	0.0839329
AGCGCGGC 0.0839329	AGCGCGGC	0.0839329
AGGGAGGA 0.0839329	AGGGAGGA	0.0839329
GAGGGCGC 0.0839329	GAGGGCGC	0.0839329
CCCACCCG 0.0834532	CCCACCCG	0.0834532
GCTGCCCC 0.0834532	GCTGCCCC	0.0834532
CGCTCCCG 0.0834532	CGCTCCCG	0.0834532
CGGGGGCC 0.0834532	CGGGGGCC	0.0834532
CCTCCTTC 0.0834532	CCTCCTTC	0.0834532
CTCCTGCC 0.0834532	CTCCTGCC	0.0834532
GCCTCGCC 0.0834532	GCCTCGCC	0.0834532
CCGCGTCC 0.0834532	CCGCGTCC	0.0834532
CAGCCCCC 0.0834532	CAGCCCCC	0.0834532
AGGGAGAG 0.0834532	AGGGAGAG	0.0834532
AGGGCGGC 0.0834532	AGGGCGGC	0.0834532
GAGCGGCC 0.0834532	GAGCGGCC	0.0834532
CTGCGCGC 0.0829736	CTGCGCGC	0.0829736
CGCCGCAG 0.0829736	CGCCGCAG	0.0829736
CGGCCCCC 0.0829736	CGGCCCCC	0.0829736
CGGGGGAG 0.0829736	CGGGGGAG	0.0829736
AGCCGCGG 0.0829736	AGCCGCGG	0.0829736
GGCCCGGA 0.0829736	GGCCCGGA	0.0829736
GGCCGCCA 0.0829736	GGCCGCCA	0.0829736
CAGCAGCA 0.0829736	CAGCAGCA	0.0829736
CACCCACA 0.082494	CACCCACA	0.082494
AGCAGCAG 0.082494	AGCAGCAG	0.082494
CCCGCACC 0.082494	CCCGCACC	0.082494
CCGCCAGC 0.082494	CCGCCAGC	0.082494
GGCGCGGA 0.082494	GGCGCGGA	0.082494
CCCCGGGG 0.0820144	CCCCGGGG	0.0820144
CGCCCAGC 0.0820144	CGCCCAGC	0.0820144
CGGCAGCC 0.0820144	CGGCAGCC	0.0820144
GCCTCTCC 0.0820144	GCCTCTCC	0.0820144
CCCTCGGC 0.0820144	CCCTCGGC	0.0820144
GGAGGAGA 0.0820144	GGAGGAGA	0.0820144
GGAGGGCC 0.0820144	GGAGGGCC	0.0820144
GCTGGGGA 0.0815348	GCTGGGGA	0.0815348
CGGAGGGC 0.0815348	CGGAGGGC	0.0815348
CGGGTCCC 0.0815348	CGGGTCCC	0.0815348
CCTCGCCC 0.0815348	CCTCGCCC	0.0815348
GCCCCGGA 0.0815348	GCCCCGGA	0.0815348
GCCCGAGC 0.0815348	GCCCGAGC	0.0815348
AGGCCCCG 0.0815348	AGGCCCCG	0.0815348
CCCCCCGC 0.0810552	CCCCCCGC	0.0810552
CCCCCCTC 0.0810552	CCCCCCTC	0.0810552
CGCGCAGC 0.0810552	CGCGCAGC	0.0810552
CCGGCAGC 0.0810552	CCGGCAGC	0.0810552
CTCTCTCC 0.0810552	CTCTCTCC	0.0810552
AGGCAGAG 0.0810552	AGGCAGAG	0.0810552
CCCGCAGG 0.0810552	CCCGCAGG	0.0810552
CCCGCCCA 0.0810552	CCCGCCCA	0.0810552
CCGCCGAG 0.0810552	CCGCCGAG	0.0810552
GAGCGGGC 0.0810552	GAGCGGGC	0.0810552
CACCCAGG 0.0805755	CACCCAGG	0.0805755
GGCTGCCC 0.0805755	GGCTGCCC	0.0805755
GGTGGGGA 0.0805755	GGTGGGGA	0.0805755
CGCTGCCG 0.0805755	CGCTGCCG	0.0805755
CGGGGACG 0.0805755	CGGGGACG	0.0805755
CCACGCCC 0.0805755	CCACGCCC	0.0805755
CTCTCCCC 0.0805755	CTCTCCCC	0.0805755
CAGCGCCG 0.0805755	CAGCGCCG	0.0805755
CCCGACCC 0.0800959	CCCGACCC	0.0800959
CTGCTGCC 0.0800959	CTGCTGCC	0.0800959
GCGCGCGC 0.0800959	GCGCGCGC	0.0800959
GGGCCACC 0.0800959	GGGCCACC	0.0800959
GGGTGGGA 0.0800959	GGGTGGGA	0.0800959
CGGGCCTC 0.0800959	CGGGCCTC	0.0800959
CGGGGGGC 0.0800959	CGGGGGGC	0.0800959
CCTCGGCG 0.0800959	CCTCGGCG	0.0800959
CCTCGGGC 0.0800959	CCTCGGGC	0.0800959
GCAGGGCC 0.0800959	GCAGGGCC	0.0800959
AGCGCCGC 0.0800959	AGCGCCGC	0.0800959
CTCCACCC 0.0800959	CTCCACCC	0.0800959
CAGCCCAG 0.0800959	CAGCCCAG	0.0800959
CAGGCCGG 0.0800959	CAGGCCGG	0.0800959
CACCGCCC 0.0796163	CACCGCCC	0.0796163
CGAGGCCC 0.0796163	CGAGGCCC	0.0796163
CGCTCGGC 0.0796163	CGCTCGGC	0.0796163
GCCCCAGC 0.0796163	GCCCCAGC	0.0796163
AGGCGCGG 0.0796163	AGGCGCGG	0.0796163
CAGCCGCG 0.0796163	CAGCCGCG	0.0796163
CCAGCGCC 0.0791367	CCAGCGCC	0.0791367
CGGCCGAG 0.0791367	CGGCCGAG	0.0791367
AGCCTGGG 0.0791367	AGCCTGGG	0.0791367
GCGAGCGC 0.0791367	GCGAGCGC	0.0791367
AGGCCGAG 0.0791367	AGGCCGAG	0.0791367
CAGCGGCC 0.0791367	CAGCGGCC	0.0791367
CCCACCGC 0.0786571	CCCACCGC	0.0786571
CCCAGCAG 0.0786571	CCCAGCAG	0.0786571
CCCAGCGC 0.0786571	CCCAGCGC	0.0786571
CCCCGAGG 0.0786571	CCCCGAGG	0.0786571
GCGCTCCC 0.0786571	GCGCTCCC	0.0786571
CGGGAGGA 0.0786571	CGGGAGGA	0.0786571
CGGGCGGA 0.0786571	CGGGCGGA	0.0786571
CCAGCCGC 0.0786571	CCAGCCGC	0.0786571
AGGAGCTG 0.0786571	AGGAGCTG	0.0786571
AGGCGGAG 0.0786571	AGGCGGAG	0.0786571
CCGCGGGA 0.0786571	CCGCGGGA	0.0786571
CACCCAGC 0.0781775	CACCCAGC	0.0781775
CCTCCAGC 0.0781775	CCTCCAGC	0.0781775
CTCAGCCC 0.0781775	CTCAGCCC	0.0781775
GCCTCCCA 0.0781775	GCCTCCCA	0.0781775
CCCGCTGC 0.0781775	CCCGCTGC	0.0781775
CAGGGCGG 0.0781775	CAGGGCGG	0.0781775
CCTGCTGC 0.0781775	CCTGCTGC	0.0781775
CCCACGCC 0.0776978	CCCACGCC	0.0776978
CTGTCCCC 0.0776978	CTGTCCCC	0.0776978
GCGCGGGA 0.0776978	GCGCGGGA	0.0776978
GGCTGGGA 0.0776978	GGCTGGGA	0.0776978
CCGGGTCC 0.0776978	CCGGGTCC	0.0776978
CCTCCACC 0.0776978	CCTCCACC	0.0776978
CCTCCAGG 0.0776978	CCTCCAGG	0.0776978
CCTCTTCC 0.0776978	CCTCTTCC	0.0776978
AGCCGGGG 0.0776978	AGCCGGGG	0.0776978
GCCGCGGA 0.0776978	GCCGCGGA	0.0776978
CAGGCCCC 0.0776978	CAGGCCCC	0.0776978
GAGGAGCC 0.0776978	GAGGAGCC	0.0776978
CGGCTGCC 0.0772182	CGGCTGCC	0.0772182
CGGGCAGC 0.0772182	CGGGCAGC	0.0772182
CCGGGCAG 0.0772182	CCGGGCAG	0.0772182
CCTCCTCG 0.0772182	CCTCCTCG	0.0772182
GAAAAAAA 0.0772182	GAAAAAAA	0.0772182
CCGCCCCA 0.0772182	CCGCCCCA	0.0772182
CCGCCTGC 0.0772182	CCGCCTGC	0.0772182
GGAGAGGA 0.0772182	GGAGAGGA	0.0772182
CCCCTGCC 0.0767386	CCCCTGCC	0.0767386
CGAGCGGC 0.0767386	CGAGCGGC	0.0767386
CGCGTCCC 0.0767386	CGCGTCCC	0.0767386
CCGGCTCG 0.0767386	CCGGCTCG	0.0767386
CCGCAGCG 0.0767386	CCGCAGCG	0.0767386
CAGCGCCC 0.0767386	CAGCGCCC	0.0767386
GCGGCGAC 0.076259	GCGGCGAC	0.076259
CACCCCCA 0.076259	CACCCCCA	0.076259
CGAGCCGC 0.076259	CGAGCCGC	0.076259
GCAGGCGC 0.076259	GCAGGCGC	0.076259
CTCCTCCA 0.076259	CTCCTCCA	0.076259
CAGCGCGG 0.076259	CAGCGCGG	0.076259
GCGCGCAC 0.0757794	GCGCGCAC	0.0757794
CACCCCGC 0.0757794	CACCCCGC	0.0757794
GGCTTCCC 0.0757794	GGCTTCCC	0.0757794
CGCCGGGA 0.0757794	CGCCGGGA	0.0757794
ACGGCGGC 0.0757794	ACGGCGGC	0.0757794
CGCTGCGC 0.0757794	CGCTGCGC	0.0757794
AGCCCGCC 0.0757794	AGCCCGCC	0.0757794
AGCCGCGC 0.0757794	AGCCGCGC	0.0757794
CCTGGGAG 0.0757794	CCTGGGAG	0.0757794
CGGCCTGC 0.0752998	CGGCCTGC	0.0752998
CCACAGCC 0.0752998	CCACAGCC	0.0752998
CTCCTCTC 0.0752998	CTCCTCTC	0.0752998
CTCGGCTC 0.0752998	CTCGGCTC	0.0752998
GCCGGGAC 0.0752998	GCCGGGAC	0.0752998
CTGCCCCC 0.0748201	CTGCCCCC	0.0748201
CTGGGCCC 0.0748201	CTGGGCCC	0.0748201
CGCCCCCA 0.0748201	CGCCCCCA	0.0748201
CGGGACCC 0.0748201	CGGGACCC	0.0748201
AGCCCAGG 0.0748201	AGCCCAGG	0.0748201
AGCGGGGC 0.0748201	AGCGGGGC	0.0748201
CCCTGCGC 0.0748201	CCCTGCGC	0.0748201
CCGAGCGC 0.0748201	CCGAGCGC	0.0748201
CAGCTCCG 0.0748201	CAGCTCCG	0.0748201
CCCCGCTC 0.0743405	CCCCGCTC	0.0743405
CTGGCCGC 0.0743405	CTGGCCGC	0.0743405
GCGGGGGA 0.0743405	GCGGGGGA	0.0743405
CACAGCCC 0.0743405	CACAGCCC	0.0743405
CGGCTCGC 0.0743405	CGGCTCGC	0.0743405
GCAGGCCC 0.0743405	GCAGGCCC	0.0743405
CTCCCCAC 0.0743405	CTCCCCAC	0.0743405
AGGAAGGG 0.0743405	AGGAAGGG	0.0743405
AGGCCGCC 0.0743405	AGGCCGCC	0.0743405
CCCTCCCA 0.0743405	CCCTCCCA	0.0743405
CCCTGGGC 0.0743405	CCCTGGGC	0.0743405
CAGAGGCC 0.0743405	CAGAGGCC	0.0743405
CCCCAGGG 0.0738609	CCCCAGGG	0.0738609
CTGCCCGC 0.0738609	CTGCCCGC	0.0738609
AGAGAGAG 0.0738609	AGAGAGAG	0.0738609
AGCGCGCG 0.0738609	AGCGCGCG	0.0738609
CCCTCGCC 0.0738609	CCCTCGCC	0.0738609
CCCACCTC 0.0733813	CCCACCTC	0.0733813
CTGCCACC 0.0733813	CTGCCACC	0.0733813
CACCTCCC 0.0733813	CACCTCCC	0.0733813
CGGGGTCC 0.0733813	CGGGGTCC	0.0733813
CCACACAC 0.0733813	CCACACAC	0.0733813
CCACCCGC 0.0733813	CCACCCGC	0.0733813
AGCCGGAG 0.0733813	AGCCGGAG	0.0733813
AGCGGAGG 0.0733813	AGCGGAGG	0.0733813
CTCCAGGC 0.0733813	CTCCAGGC	0.0733813
CTCTGCCC 0.0733813	CTCTGCCC	0.0733813
AGGAGGAA 0.0733813	AGGAGGAA	0.0733813
GGCCAGCC 0.0733813	GGCCAGCC	0.0733813
CAGAGCCC 0.0733813	CAGAGCCC	0.0733813
AGGCTGAG 0.0733813	AGGCTGAG	0.0733813
GAGCCGGC 0.0733813	GAGCCGGC	0.0733813
CCCAGCCG 0.0729017	CCCAGCCG	0.0729017
GGGAGAGA 0.0729017	GGGAGAGA	0.0729017
CGAGCCCG 0.0729017	CGAGCCCG	0.0729017
CGCAGCGC 0.0729017	CGCAGCGC	0.0729017
CGGTCCCC 0.0729017	CGGTCCCC	0.0729017
CCCGGCAG 0.0729017	CCCGGCAG	0.0729017
CCGAGGGC 0.0729017	CCGAGGGC	0.0729017
CCGCCGTC 0.0729017	CCGCCGTC	0.0729017
GGAGGCCC 0.0729017	GGAGGCCC	0.0729017
CCCCTCCG 0.0724221	CCCCTCCG	0.0724221
CTTCCCTC 0.0724221	CTTCCCTC	0.0724221
CACCGCCG 0.0724221	CACCGCCG	0.0724221
GGGAAGGA 0.0724221	GGGAAGGA	0.0724221
CGCGCTGC 0.0724221	CGCGCTGC	0.0724221
CCGGGAAG 0.0724221	CCGGGAAG	0.0724221
CTCCGGGA 0.0724221	CTCCGGGA	0.0724221
GCCCCACC 0.0724221	GCCCCACC	0.0724221
CCGCCTCG 0.0724221	CCGCCTCG	0.0724221
CAGGCCTC 0.0724221	CAGGCCTC	0.0724221
CAGGGCCC 0.0724221	CAGGGCCC	0.0724221
CCTGCAGC 0.0724221	CCTGCAGC	0.0724221
CTGGGGAC 0.0719424	CTGGGGAC	0.0719424
GCGGCCGA 0.0719424	GCGGCCGA	0.0719424
CGGAGGGA 0.0719424	CGGAGGGA	0.0719424
CGGGCGAG 0.0719424	CGGGCGAG	0.0719424
AGAGGCAG 0.0719424	AGAGGCAG	0.0719424
CTCGGCGC 0.0719424	CTCGGCGC	0.0719424
AGGAGCCG 0.0719424	AGGAGCCG	0.0719424
AGGCGGCC 0.0719424	AGGCGGCC	0.0719424
CCCTCCAC 0.0719424	CCCTCCAC	0.0719424
CCGCACCC 0.0719424	CCGCACCC	0.0719424
CAGGGAGG 0.0719424	CAGGGAGG	0.0719424
ACACACAC 0.0719424	ACACACAC	0.0719424
GAGGGGAC 0.0719424	GAGGGGAC	0.0719424
CTGGGCTC 0.0714628	CTGGGCTC	0.0714628
GCGCTGCC 0.0714628	GCGCTGCC	0.0714628
GCTGCGCC 0.0714628	GCTGCGCC	0.0714628
CACTCACC 0.0714628	CACTCACC	0.0714628
GGTGCTGA 0.0714628	GGTGCTGA	0.0714628
GACCCCGC 0.0714628	GACCCCGC	0.0714628
CCAGCCAG 0.0714628	CCAGCCAG	0.0714628
AGCCCAGC 0.0714628	AGCCCAGC	0.0714628
AGCGGGCG 0.0714628	AGCGGGCG	0.0714628
CTCCCTGC 0.0714628	CTCCCTGC	0.0714628
CTCTCCGC 0.0714628	CTCTCCGC	0.0714628
ACCCCGCC 0.0714628	ACCCCGCC	0.0714628
AGGCCCAG 0.0714628	AGGCCCAG	0.0714628
CCCTGCTC 0.0714628	CCCTGCTC	0.0714628
GGAAGGGA 0.0714628	GGAAGGGA	0.0714628
CAGCACCA 0.0714628	CAGCACCA	0.0714628
CAGCCAGG 0.0714628	CAGCCAGG	0.0714628
CTGGAGGC 0.0709832	CTGGAGGC	0.0709832
CGGCGGCA 0.0709832	CGGCGGCA	0.0709832
CCGGGCCA 0.0709832	CCGGGCCA	0.0709832
CCTCGCCG 0.0709832	CCTCGCCG	0.0709832
CCACCCCA 0.0709832	CCACCCCA	0.0709832
CTCGCCCC 0.0709832	CTCGCCCC	0.0709832
AGGCCTGG 0.0709832	AGGCCTGG	0.0709832
CCGCAGGC 0.0709832	CCGCAGGC	0.0709832
GGAGGGAA 0.0709832	GGAGGGAA	0.0709832
CCTGCCGC 0.0709832	CCTGCCGC	0.0709832
GAGGGAGC 0.0709832	GAGGGAGC	0.0709832
CTGCCCTC 0.0705036	CTGCCCTC	0.0705036
CTGGCTCC 0.0705036	CTGGCTCC	0.0705036
CGCTCCTC 0.0705036	CGCTCCTC	0.0705036
CCGGAGGA 0.0705036	CCGGAGGA	0.0705036
CCAGAGCC 0.0705036	CCAGAGCC	0.0705036
AGCCAGGG 0.0705036	AGCCAGGG	0.0705036
AGCCTCCC 0.0705036	AGCCTCCC	0.0705036
GCCTCAGC 0.0705036	GCCTCAGC	0.0705036
CAGGGCCG 0.0705036	CAGGGCCG	0.0705036
CCTGCGCC 0.0705036	CCTGCGCC	0.0705036
CCTGGAGC 0.0705036	CCTGGAGC	0.0705036
CCTGGGGA 0.0705036	CCTGGGGA	0.0705036
GAGGCAGC 0.0705036	GAGGCAGC	0.0705036
CCCCTGGC 0.070024	CCCCTGGC	0.070024
CTGCCTGC 0.070024	CTGCCTGC	0.070024
CTTCCCCC 0.070024	CTTCCCCC	0.070024
GCGGGCGA 0.070024	GCGGGCGA	0.070024
GCGGGGCA 0.070024	GCGGGGCA	0.070024
CGCCCTGC 0.070024	CGCCCTGC	0.070024
CGGCGCCG 0.070024	CGGCGCCG	0.070024
GTGGGGGA 0.070024	GTGGGGGA	0.070024
AGCAGCCC 0.070024	AGCAGCCC	0.070024
GCCTGGGA 0.070024	GCCTGGGA	0.070024
CCCTCTGC 0.070024	CCCTCTGC	0.070024
CCTGCGCG 0.070024	CCTGCGCG	0.070024
CCCCTCTC 0.0695444	CCCCTCTC	0.0695444
CTGGCGGC 0.0695444	CTGGCGGC	0.0695444
GCGTCCCC 0.0695444	GCGTCCCC	0.0695444
CGCCACCG 0.0695444	CGCCACCG	0.0695444
CCGGGGTC 0.0695444	CCGGGGTC	0.0695444
AGAGGGAG 0.0695444	AGAGGGAG	0.0695444
AGGCAGGG 0.0695444	AGGCAGGG	0.0695444
CCGCCGCA 0.0695444	CCGCCGCA	0.0695444
CAGGCGGC 0.0695444	CAGGCGGC	0.0695444
GAGAGAGA 0.0695444	GAGAGAGA	0.0695444
AAGATGGC 0.0690647	AAGATGGC	0.0690647
CGGCGTCC 0.0690647	CGGCGTCC	0.0690647
CGGCTTCC 0.0690647	CGGCTTCC	0.0690647
CCACCCTC 0.0690647	CCACCCTC	0.0690647
AGCTGCGG 0.0690647	AGCTGCGG	0.0690647
AGGCAGCC 0.0690647	AGGCAGCC	0.0690647
CCCGCGGG 0.0690647	CCCGCGGG	0.0690647
CAGGCAGC 0.0690647	CAGGCAGC	0.0690647
AGGGAAGG 0.0690647	AGGGAAGG	0.0690647
GGGAGGAA 0.0685851	GGGAGGAA	0.0685851
GGGCCGGA 0.0685851	GGGCCGGA	0.0685851
CGAGCCCC 0.0685851	CGAGCCCC	0.0685851
CCTCTCTC 0.0685851	CCTCTCTC	0.0685851
GCAGAGCC 0.0685851	GCAGAGCC	0.0685851
CCACCACC 0.0685851	CCACCACC	0.0685851
AGCGGCCG 0.0685851	AGCGGCCG	0.0685851
GCCACCCC 0.0685851	GCCACCCC	0.0685851
GCGCCACC 0.0685851	GCGCCACC	0.0685851
AGGCCCGC 0.0685851	AGGCCCGC	0.0685851
CCCTCAGC 0.0685851	CCCTCAGC	0.0685851
CCTGCGGC 0.0685851	CCTGCGGC	0.0685851
CCCCTCGC 0.0681055	CCCCTCGC	0.0681055
CTGAGCCC 0.0681055	CTGAGCCC	0.0681055
CTGCTTCC 0.0681055	CTGCTTCC	0.0681055
CTTCCCGC 0.0681055	CTTCCCGC	0.0681055
GCGCGAGC 0.0681055	GCGCGAGC	0.0681055
GCTCCCCC 0.0681055	GCTCCCCC	0.0681055
GGGCTGGA 0.0681055	GGGCTGGA	0.0681055
CGCAGGGC 0.0681055	CGCAGGGC	0.0681055
CGCCACCC 0.0681055	CGCCACCC	0.0681055
CGCGGCCA 0.0681055	CGCGGCCA	0.0681055
CGGCCGCA 0.0681055	CGGCCGCA	0.0681055
CCGGCCGG 0.0681055	CCGGCCGG	0.0681055
AGCCCTGG 0.0681055	AGCCCTGG	0.0681055
AGCGGCCC 0.0681055	AGCGGCCC	0.0681055
CTCCCCAG 0.0681055	CTCCCCAG	0.0681055
GCCAGCCC 0.0681055	GCCAGCCC	0.0681055
GCCCCGCA 0.0681055	GCCCCGCA	0.0681055
AGCTCCGG 0.0681055	AGCTCCGG	0.0681055
AGGCAGGA 0.0681055	AGGCAGGA	0.0681055
AGGCCGGC 0.0681055	AGGCCGGC	0.0681055
GGAGCGGA 0.0681055	GGAGCGGA	0.0681055
CAGCAGCG 0.0681055	CAGCAGCG	0.0681055
AGGGTGGG 0.0681055	AGGGTGGG	0.0681055
GAGGCAGA 0.0681055	GAGGCAGA	0.0681055
CCAGGCTC 0.0676259	CCAGGCTC	0.0676259
CCCGAGGG 0.0676259	CCCGAGGG	0.0676259
CACCCGGC 0.0676259	CACCCGGC	0.0676259
CGAGCGCG 0.0676259	CGAGCGCG	0.0676259
CGCGCGCG 0.0676259	CGCGCGCG	0.0676259
CGGCGCTC 0.0676259	CGGCGCTC	0.0676259
CGGTGGCC 0.0676259	CGGTGGCC	0.0676259
CCGGTCCC 0.0676259	CCGGTCCC	0.0676259
GAAGGGGC 0.0676259	GAAGGGGC	0.0676259
AGCCGCCC 0.0676259	AGCCGCCC	0.0676259
CTTCCTGC 0.0676259	CTTCCTGC	0.0676259
CCCGGAAG 0.0676259	CCCGGAAG	0.0676259
CCGCTGCG 0.0676259	CCGCTGCG	0.0676259
CCGCTTCC 0.0676259	CCGCTTCC	0.0676259
CAGCCTCG 0.0676259	CAGCCTCG	0.0676259
CCTGGCCG 0.0676259	CCTGGCCG	0.0676259
CCCAGAGC 0.0671463	CCCAGAGC	0.0671463
CCCCGCAC 0.0671463	CCCCGCAC	0.0671463
CTGCTGGC 0.0671463	CTGCTGGC	0.0671463
CTGGGGCC 0.0671463	CTGGGGCC	0.0671463
GCTGGCCC 0.0671463	GCTGGCCC	0.0671463
CGCAGGCG 0.0671463	CGCAGGCG	0.0671463
CGCCTGCC 0.0671463	CGCCTGCC	0.0671463
GCAGGGGC 0.0671463	GCAGGGGC	0.0671463
CCACGGCC 0.0671463	CCACGGCC	0.0671463
CCAGCCCA 0.0671463	CCAGCCCA	0.0671463
CTCCCGGA 0.0671463	CTCCCGGA	0.0671463
GCCCCCAC 0.0671463	GCCCCCAC	0.0671463
AGGAGGGA 0.0671463	AGGAGGGA	0.0671463
CCCGCCAG 0.0671463	CCCGCCAG	0.0671463
CCCGGGAA 0.0671463	CCCGGGAA	0.0671463
CCCGGTCC 0.0671463	CCCGGTCC	0.0671463
GGAGCCCA 0.0671463	GGAGCCCA	0.0671463
GGCGGGAC 0.0671463	GGCGGGAC	0.0671463
CAGCCCTG 0.0671463	CAGCCCTG	0.0671463
CAGGAGCC 0.0671463	CAGGAGCC	0.0671463
AGGGAGGC 0.0671463	AGGGAGGC	0.0671463
CCTGGGCG 0.0671463	CCTGGGCG	0.0671463
GAGGGGCC 0.0671463	GAGGGGCC	0.0671463
CACCCGGG 0.0666667	CACCCGGG	0.0666667
CACCCTCC 0.0666667	CACCCTCC	0.0666667
GGGCCCCC 0.0666667	GGGCCCCC	0.0666667
GGGCTGCA 0.0666667	GGGCTGCA	0.0666667
CGCAGCTC 0.0666667	CGCAGCTC	0.0666667
CGGAGCAG 0.0666667	CGGAGCAG	0.0666667
CGGCCGGA 0.0666667	CGGCCGGA	0.0666667
CGGCGAGC 0.0666667	CGGCGAGC	0.0666667
CGGGAGAG 0.0666667	CGGGAGAG	0.0666667
GCAGGAGC 0.0666667	GCAGGAGC	0.0666667
AGAGAAAG 0.0666667	AGAGAAAG	0.0666667
ACCGCCCC 0.0666667	ACCGCCCC	0.0666667
AGGAGGGC 0.0666667	AGGAGGGC	0.0666667
CAGGAGGC 0.0666667	CAGGAGGC	0.0666667
AGGGCGCG 0.0666667	AGGGCGCG	0.0666667
AGGGGCTG 0.0666667	AGGGGCTG	0.0666667
CCTTCCCG 0.0666667	CCTTCCCG	0.0666667
GAGCGAGC 0.0666667	GAGCGAGC	0.0666667
CCAGGGCG 0.0661871	CCAGGGCG	0.0661871
CCCAGCAC 0.0661871	CCCAGCAC	0.0661871
CCCCCCCA 0.0661871	CCCCCCCA	0.0661871
CTGCGCCC 0.0661871	CTGCGCCC	0.0661871
CTGGAGGA 0.0661871	CTGGAGGA	0.0661871
CGCTGGGC 0.0661871	CGCTGGGC	0.0661871
CGGGTGGC 0.0661871	CGGGTGGC	0.0661871
AGAGGCGG 0.0661871	AGAGGCGG	0.0661871
AGCGGGAG 0.0661871	AGCGGGAG	0.0661871
CTCTGCAG 0.0661871	CTCTGCAG	0.0661871
ACCGCCGC 0.0661871	ACCGCCGC	0.0661871
AGGAAGGA 0.0661871	AGGAAGGA	0.0661871
AGGCCAGG 0.0661871	AGGCCAGG	0.0661871
AGGCGGGC 0.0661871	AGGCGGGC	0.0661871
CCCTCACC 0.0661871	CCCTCACC	0.0661871
CCGAGGAG 0.0661871	CCGAGGAG	0.0661871
CAGCGGGC 0.0661871	CAGCGGGC	0.0661871
CCAGGAGG 0.0657074	CCAGGAGG	0.0657074
CCAGGCGG 0.0657074	CCAGGCGG	0.0657074
GCTGTCCC 0.0657074	GCTGTCCC	0.0657074
CGCCCCAG 0.0657074	CGCCCCAG	0.0657074
CGCTCTCC 0.0657074	CGCTCTCC	0.0657074
CCGGGGGA 0.0657074	CCGGGGGA	0.0657074
AGCCGAGC 0.0657074	AGCCGAGC	0.0657074
AGCGAGCG 0.0657074	AGCGAGCG	0.0657074
CTCACCTC 0.0657074	CTCACCTC	0.0657074
GCCACCAC 0.0657074	GCCACCAC	0.0657074
GCGCACGC 0.0657074	GCGCACGC	0.0657074
ACCCCGGG 0.0657074	ACCCCGGG	0.0657074
AGCTGGGG 0.0657074	AGCTGGGG	0.0657074
CCCGCCAC 0.0657074	CCCGCCAC	0.0657074
CCGAGCGG 0.0657074	CCGAGCGG	0.0657074
GGCGGAGA 0.0657074	GGCGGAGA	0.0657074
CCTGGCTC 0.0657074	CCTGGCTC	0.0657074
GAGGCGGA 0.0657074	GAGGCGGA	0.0657074
CCCAACCC 0.0652278	CCCAACCC	0.0652278
CCCAGGAG 0.0652278	CCCAGGAG	0.0652278
CCCCACGC 0.0652278	CCCCACGC	0.0652278
CCCGAGCG 0.0652278	CCCGAGCG	0.0652278
CTGGCCTC 0.0652278	CTGGCCTC	0.0652278
GCTCCAGC 0.0652278	GCTCCAGC	0.0652278
GGGCAGGA 0.0652278	GGGCAGGA	0.0652278
CGAGCGCC 0.0652278	CGAGCGCC	0.0652278
CCGGCCAC 0.0652278	CCGGCCAC	0.0652278
CCTCACCC 0.0652278	CCTCACCC	0.0652278
CTCTTCCC 0.0652278	CTCTTCCC	0.0652278
GCCGCCCA 0.0652278	GCCGCCCA	0.0652278
GCGAGCCC 0.0652278	GCGAGCCC	0.0652278
AGGCCACC 0.0652278	AGGCCACC	0.0652278
CAGCCAGC 0.0652278	CAGCCAGC	0.0652278
CAGGGGGC 0.0652278	CAGGGGGC	0.0652278
AGGGGCGC 0.0652278	AGGGGCGC	0.0652278
GAGGAAGA 0.0652278	GAGGAAGA	0.0652278
CCCACAGC 0.0647482	CCCACAGC	0.0647482
CCCCACCG 0.0647482	CCCCACCG	0.0647482
CCCCCGAG 0.0647482	CCCCCGAG	0.0647482
CCCCGCCA 0.0647482	CCCCGCCA	0.0647482
CACCACCC 0.0647482	CACCACCC	0.0647482
GGGGTGGA 0.0647482	GGGGTGGA	0.0647482
CGCCAGGC 0.0647482	CGCCAGGC	0.0647482
GCCTGCCC 0.0647482	GCCTGCCC	0.0647482
CCCGGACC 0.0647482	CCCGGACC	0.0647482
CCCGGGTC 0.0647482	CCCGGGTC	0.0647482
CCCTTTCC 0.0647482	CCCTTTCC	0.0647482
CCGGAAGC 0.0647482	CCGGAAGC	0.0647482
CAGGCAGG 0.0647482	CAGGCAGG	0.0647482
CAGGGCAG 0.0647482	CAGGGCAG	0.0647482
AGGGCCGG 0.0647482	AGGGCCGG	0.0647482
AGGGCTGG 0.0647482	AGGGCTGG	0.0647482
CCAGGAGC 0.0642686	CCAGGAGC	0.0642686
GCGTGGCC 0.0642686	GCGTGGCC	0.0642686
GCTCTGCC 0.0642686	GCTCTGCC	0.0642686
GCTGAGCC 0.0642686	GCTGAGCC	0.0642686
CGCCCGCA 0.0642686	CGCCCGCA	0.0642686
CGGGCCCG 0.0642686	CGGGCCCG	0.0642686
AGCCCACC 0.0642686	AGCCCACC	0.0642686
CTCCTCGC 0.0642686	CTCCTCGC	0.0642686
CTCTCCTC 0.0642686	CTCTCCTC	0.0642686
CCGAGGCG 0.0642686	CCGAGGCG	0.0642686
CCGCGCGG 0.0642686	CCGCGCGG	0.0642686
GGCCTGGA 0.0642686	GGCCTGGA	0.0642686
AGGGCCGC 0.0642686	AGGGCCGC	0.0642686
CCTGCCCG 0.0642686	CCTGCCCG	0.0642686
CCCCAGGA 0.063789	CCCCAGGA	0.063789
AAAGAAAA 0.063789	AAAGAAAA	0.063789
CTGGGGGC 0.063789	CTGGGGGC	0.063789
GCGGGACC 0.063789	GCGGGACC	0.063789
CGCTGGCC 0.063789	CGCTGGCC	0.063789
CGGCCAGC 0.063789	CGGCCAGC	0.063789
CCGGGAGA 0.063789	CCGGGAGA	0.063789
GACCTCCC 0.063789	GACCTCCC	0.063789
AGAGGAAG 0.063789	AGAGGAAG	0.063789
GCCGGGCA 0.063789	GCCGGGCA	0.063789
GCGCCCAC 0.063789	GCGCCCAC	0.063789
ACCCCGGC 0.063789	ACCCCGGC	0.063789
ACCCGGCC 0.063789	ACCCGGCC	0.063789
AGGAAAGG 0.063789	AGGAAAGG	0.063789
AGGCCTCC 0.063789	AGGCCTCC	0.063789
CCCGGCCA 0.063789	CCCGGCCA	0.063789
CCCTCCGG 0.063789	CCCTCCGG	0.063789
GGCGGGAA 0.063789	GGCGGGAA	0.063789
CAGAGCTG 0.063789	CAGAGCTG	0.063789
CAGCCTGC 0.063789	CAGCCTGC	0.063789
GAGCCTCC 0.063789	GAGCCTCC	0.063789
GAGGCCCC 0.063789	GAGGCCCC	0.063789
GAGGCCGA 0.063789	GAGGCCGA	0.063789
CCAGGCAG 0.0633094	CCAGGCAG	0.0633094
CGCCAGCC 0.0633094	CGCCAGCC	0.0633094
CGCCCCAC 0.0633094	CGCCCCAC	0.0633094
CGCGCGCA 0.0633094	CGCGCGCA	0.0633094
CGGGACGC 0.0633094	CGGGACGC	0.0633094
CCTCCGAG 0.0633094	CCTCCGAG	0.0633094
CCACCGCG 0.0633094	CCACCGCG	0.0633094
AGCGCCCC 0.0633094	AGCGCCCC	0.0633094
GCCGAGGA 0.0633094	GCCGAGGA	0.0633094
AGCTGGGC 0.0633094	AGCTGGGC	0.0633094
CAGGAAGC 0.0633094	CAGGAAGC	0.0633094
CCAGCGGC 0.0628297	CCAGCGGC	0.0628297
CCCCCAGG 0.0628297	CCCCCAGG	0.0628297
CTGGGAGC 0.0628297	CTGGGAGC	0.0628297
CCTCTCCG 0.0628297	CCTCTCCG	0.0628297
GCACCGCC 0.0628297	GCACCGCC	0.0628297
AGCGGAGC 0.0628297	AGCGGAGC	0.0628297
GCCACAGC 0.0628297	GCCACAGC	0.0628297
AGGAAGAG 0.0628297	AGGAAGAG	0.0628297
AGGAGAGG 0.0628297	AGGAGAGG	0.0628297
CCGACCCC 0.0628297	CCGACCCC	0.0628297
CCGCCAGG 0.0628297	CCGCCAGG	0.0628297
CCGCCATC 0.0628297	CCGCCATC	0.0628297
CAGCAGGC 0.0628297	CAGCAGGC	0.0628297
AGGTGAGG 0.0628297	AGGTGAGG	0.0628297
CCTTCTCC 0.0628297	CCTTCTCC	0.0628297
CCAGGAAG 0.0623501	CCAGGAAG	0.0623501
CCCCCTGC 0.0623501	CCCCCTGC	0.0623501
CTGCAGGC 0.0623501	CTGCAGGC	0.0623501
CTGGAGCC 0.0623501	CTGGAGCC	0.0623501
CGCCTCGC 0.0623501	CGCCTCGC	0.0623501
CGGCCCTC 0.0623501	CGGCCCTC	0.0623501
CCACCAGC 0.0623501	CCACCAGC	0.0623501
CTTTCTCC 0.0623501	CTTTCTCC	0.0623501
CCCGCTCG 0.0623501	CCCGCTCG	0.0623501
CCCTGGAG 0.0623501	CCCTGGAG	0.0623501
CAGGGTGG 0.0623501	CAGGGTGG	0.0623501
AGGTGGGG 0.0623501	AGGTGGGG	0.0623501
CCCATCCC 0.0618705	CCCATCCC	0.0618705
CCCCCCCC 0.0618705	CCCCCCCC	0.0618705
ACGCCGCC 0.0618705	ACGCCGCC	0.0618705
CGGCCCAG 0.0618705	CGGCCCAG	0.0618705
CGGGAAGC 0.0618705	CGGGAAGC	0.0618705
CCGGGACG 0.0618705	CCGGGACG	0.0618705
CCGTCCCC 0.0618705	CCGTCCCC	0.0618705
AGCCAGGC 0.0618705	AGCCAGGC	0.0618705
AGCGCCGG 0.0618705	AGCGCCGG	0.0618705
ACTTCCGG 0.0618705	ACTTCCGG	0.0618705
AGCTGCTG 0.0618705	AGCTGCTG	0.0618705
AGCTGGAG 0.0618705	AGCTGGAG	0.0618705
AGGAGGTG 0.0618705	AGGAGGTG	0.0618705
CCCTGCAG 0.0618705	CCCTGCAG	0.0618705
CCGAGTCC 0.0618705	CCGAGTCC	0.0618705
GGCCACCA 0.0618705	GGCCACCA	0.0618705
CCTTTCCC 0.0618705	CCTTTCCC	0.0618705
GAGCAGCC 0.0618705	GAGCAGCC	0.0618705
GAGGCGCC 0.0618705	GAGGCGCC	0.0618705
CCAGGGAG 0.0613909	CCAGGGAG	0.0613909
CTGAGGCC 0.0613909	CTGAGGCC	0.0613909
CTGGCCCC 0.0613909	CTGGCCCC	0.0613909
CCGGTGGC 0.0613909	CCGGTGGC	0.0613909
AGCAGCGC 0.0613909	AGCAGCGC	0.0613909
CTCTGCTC 0.0613909	CTCTGCTC	0.0613909
GCCGCCGA 0.0613909	GCCGCCGA	0.0613909
ACCCCGCG 0.0613909	ACCCCGCG	0.0613909
CCCGGTGC 0.0613909	CCCGGTGC	0.0613909
CAGCTCGG 0.0613909	CAGCTCGG	0.0613909
CCTTTCTC 0.0613909	CCTTTCTC	0.0613909
GAGCCGGA 0.0613909	GAGCCGGA	0.0613909
CTTCCGCC 0.0609113	CTTCCGCC	0.0609113
ACCCCCAC 0.0609113	ACCCCCAC	0.0609113
CGCCGGAG 0.0609113	CGCCGGAG	0.0609113
CCAAGGCC 0.0609113	CCAAGGCC	0.0609113
AGCAGCGG 0.0609113	AGCAGCGG	0.0609113
AGCGCGCC 0.0609113	AGCGCGCC	0.0609113
CTCAGGCC 0.0609113	CTCAGGCC	0.0609113
GCCTTCCC 0.0609113	GCCTTCCC	0.0609113
AGGAGCGG 0.0609113	AGGAGCGG	0.0609113
AAGGGAGG 0.0609113	AAGGGAGG	0.0609113
CCCTGCGG 0.0609113	CCCTGCGG	0.0609113
CCGCGCAG 0.0609113	CCGCGCAG	0.0609113
GGCCGGCC 0.0609113	GGCCGGCC	0.0609113
GGCGAGCC 0.0609113	GGCGAGCC	0.0609113
CAGCCACC 0.0609113	CAGCCACC	0.0609113
AGGGCAGG 0.0609113	AGGGCAGG	0.0609113
GAGCGGGA 0.0609113	GAGCGGGA	0.0609113
GAGCTGGA 0.0609113	GAGCTGGA	0.0609113
CCCACTCC 0.0604317	CCCACTCC	0.0604317
CCCAGGCG 0.0604317	CCCAGGCG	0.0604317
AAAAAAAG 0.0604317	AAAAAAAG	0.0604317
GCTTCCCC 0.0604317	GCTTCCCC	0.0604317
CACCGCGG 0.0604317	CACCGCGG	0.0604317
CGGGCCAG 0.0604317	CGGGCCAG	0.0604317
GACGCGGC 0.0604317	GACGCGGC	0.0604317
CCACCGGG 0.0604317	CCACCGGG	0.0604317
AGCCGGGA 0.0604317	AGCCGGGA	0.0604317
AGCCTCCG 0.0604317	AGCCTCCG	0.0604317
CTCCTGGC 0.0604317	CTCCTGGC	0.0604317
CTCGCTCC 0.0604317	CTCGCTCC	0.0604317
CTCTGGGC 0.0604317	CTCTGGGC	0.0604317
ACCCGGGC 0.0604317	ACCCGGGC	0.0604317
GGAGACCC 0.0604317	GGAGACCC	0.0604317
GGAGGGCA 0.0604317	GGAGGGCA	0.0604317
GGCGCGCA 0.0604317	GGCGCGCA	0.0604317
CAGCGCGC 0.0604317	CAGCGCGC	0.0604317
AGGCTGGC 0.0604317	AGGCTGGC	0.0604317
AGGGAGCG 0.0604317	AGGGAGCG	0.0604317
AGGGGTGG 0.0604317	AGGGGTGG	0.0604317
GAGAGGAA 0.0604317	GAGAGGAA	0.0604317
CCAGGTCC 0.059952	CCAGGTCC	0.059952
CCCCAACC 0.059952	CCCCAACC	0.059952
GCTGCAGA 0.059952	GCTGCAGA	0.059952
GCTGTCCA 0.059952	GCTGTCCA	0.059952
CACCAGCC 0.059952	CACCAGCC	0.059952
CGCGAGGC 0.059952	CGCGAGGC	0.059952
AGAGGCCG 0.059952	AGAGGCCG	0.059952
AGCCCGAG 0.059952	AGCCCGAG	0.059952
CTCGCGGC 0.059952	CTCGCGGC	0.059952
ACCTCCCA 0.059952	ACCTCCCA	0.059952
AGGAGGCC 0.059952	AGGAGGCC	0.059952
GGCCGCGA 0.059952	GGCCGCGA	0.059952
GGCGAGGA 0.059952	GGCGAGGA	0.059952
CAGCACCG 0.059952	CAGCACCG	0.059952
CAGCCCCA 0.059952	CAGCCCCA	0.059952
CAGCCTCA 0.059952	CAGCCTCA	0.059952
CCCAGGGA 0.0594724	CCCAGGGA	0.0594724
AAAACAAA 0.0594724	AAAACAAA	0.0594724
AAAAGAAA 0.0594724	AAAAGAAA	0.0594724
AAACAAAA 0.0594724	AAACAAAA	0.0594724
CTGGGCGC 0.0594724	CTGGGCGC	0.0594724
GCTCTCCC 0.0594724	GCTCTCCC	0.0594724
CGCCACCA 0.0594724	CGCCACCA	0.0594724
CGCGAGCC 0.0594724	CGCGAGCC	0.0594724
CGTCCTCC 0.0594724	CGTCCTCC	0.0594724
AGCCGGCG 0.0594724	AGCCGGCG	0.0594724
AGCGCAGC 0.0594724	AGCGCAGC	0.0594724
AGCGGCGC 0.0594724	AGCGGCGC	0.0594724
AGCTCTGC 0.0594724	AGCTCTGC	0.0594724
CCCTGGGA 0.0594724	CCCTGGGA	0.0594724
GGAAGGAA 0.0594724	GGAAGGAA	0.0594724
CACTGCCC 0.0594724	CACTGCCC	0.0594724
CAGGAGGG 0.0594724	CAGGAGGG	0.0594724
CAGGGCGC 0.0594724	CAGGGCGC	0.0594724
CCAGGGGC 0.0589928	CCAGGGGC	0.0589928
CCCACGGC 0.0589928	CCCACGGC	0.0589928
CCCCCTTC 0.0589928	CCCCCTTC	0.0589928
CTGCGGGA 0.0589928	CTGCGGGA	0.0589928
CTGGCTGC 0.0589928	CTGGCTGC	0.0589928
CTGGGAAG 0.0589928	CTGGGAAG	0.0589928
GCTCAGCC 0.0589928	GCTCAGCC	0.0589928
GCTTCTCC 0.0589928	GCTTCTCC	0.0589928
CACCCCGG 0.0589928	CACCCCGG	0.0589928
CACGCCGC 0.0589928	CACGCCGC	0.0589928
CGCGGCGA 0.0589928	CGCGGCGA	0.0589928
CGCTGTCC 0.0589928	CGCTGTCC	0.0589928
GCAGCACC 0.0589928	GCAGCACC	0.0589928
CATGGCGG 0.0589928	CATGGCGG	0.0589928
AGAGAGGA 0.0589928	AGAGAGGA	0.0589928
CCAGCAGG 0.0589928	CCAGCAGG	0.0589928
CCAGCCGG 0.0589928	CCAGCCGG	0.0589928
AGCGGCAG 0.0589928	AGCGGCAG	0.0589928
GCCCTCGC 0.0589928	GCCCTCGC	0.0589928
GCCGGGAA 0.0589928	GCCGGGAA	0.0589928
CCGGACCC 0.0589928	CCGGACCC	0.0589928
CAGGCCAG 0.0589928	CAGGCCAG	0.0589928
AGGGCCCG 0.0589928	AGGGCCCG	0.0589928
CGACCCCG 0.0589928	CGACCCCG	0.0589928
GAGCTGCC 0.0589928	GAGCTGCC	0.0589928
GAGGTGGC 0.0589928	GAGGTGGC	0.0589928
CCCAGGAC 0.0585132	CCCAGGAC	0.0585132
CCCCTCGG 0.0585132	CCCCTCGG	0.0585132
AAAAAAAT 0.0585132	AAAAAAAT	0.0585132
CACCCGCC 0.0585132	CACCCGCC	0.0585132
CGCTGCAG 0.0585132	CGCTGCAG	0.0585132
CGCTGCTC 0.0585132	CGCTGCTC	0.0585132
CCGGCCAG 0.0585132	CCGGCCAG	0.0585132
CCTCGCGC 0.0585132	CCTCGCGC	0.0585132
CCTCGCTC 0.0585132	CCTCGCTC	0.0585132
GACCACAC 0.0585132	GACCACAC	0.0585132
AGCCGCAG 0.0585132	AGCCGCAG	0.0585132
AGGCAGGC 0.0585132	AGGCAGGC	0.0585132
CCCGCGGA 0.0585132	CCCGCGGA	0.0585132
CCGCGACC 0.0585132	CCGCGACC	0.0585132
CCGCGAGC 0.0585132	CCGCGAGC	0.0585132
CAGCGGGG 0.0585132	CAGCGGGG	0.0585132
AGGGCCTG 0.0585132	AGGGCCTG	0.0585132
AGGGGCCG 0.0585132	AGGGGCCG	0.0585132
CCTGAGCC 0.0585132	CCTGAGCC	0.0585132
ACCACACA 0.0580336	ACCACACA	0.0580336
ACCCAGGC 0.0580336	ACCCAGGC	0.0580336
CACGCCCC 0.0580336	CACGCCCC	0.0580336
GGGGCGCA 0.0580336	GGGGCGCA	0.0580336
CGCACCGC 0.0580336	CGCACCGC	0.0580336
CGTCCCGC 0.0580336	CGTCCCGC	0.0580336
CCGGTGCC 0.0580336	CCGGTGCC	0.0580336
GACCCGGC 0.0580336	GACCCGGC	0.0580336
AGATGGCG 0.0580336	AGATGGCG	0.0580336
CCACGCCG 0.0580336	CCACGCCG	0.0580336
AGCAGAGG 0.0580336	AGCAGAGG	0.0580336
AGCCCCAG 0.0580336	AGCCCCAG	0.0580336
CTTCCTTC 0.0580336	CTTCCTTC	0.0580336
ACCCGGGG 0.0580336	ACCCGGGG	0.0580336
AGGCCCTG 0.0580336	AGGCCCTG	0.0580336
CCGCGAGG 0.0580336	CCGCGAGG	0.0580336
GGCAGGGA 0.0580336	GGCAGGGA	0.0580336
GGCCTCCA 0.0580336	GGCCTCCA	0.0580336
CAGCCCAC 0.0580336	CAGCCCAC	0.0580336
CAGCCCTC 0.0580336	CAGCCCTC	0.0580336
CAGCTGCC 0.0580336	CAGCTGCC	0.0580336
GAGAGGCC 0.0580336	GAGAGGCC	0.0580336
GAGCGCCC 0.0580336	GAGCGCCC	0.0580336
GAGGAAGC 0.0580336	GAGGAAGC	0.0580336
GAGGCTCC 0.0580336	GAGGCTCC	0.0580336
CCCAGCGG 0.057554	CCCAGCGG	0.057554
CCCCAGCG 0.057554	CCCCAGCG	0.057554
AAAAAGAA 0.057554	AAAAAGAA	0.057554
CTGTGGCC 0.057554	CTGTGGCC	0.057554
GCGGGTCC 0.057554	GCGGGTCC	0.057554
GGGGCTGA 0.057554	GGGGCTGA	0.057554
CGCGCGGA 0.057554	CGCGCGGA	0.057554
CGCTTCCC 0.057554	CGCTTCCC	0.057554
CCTCGGAG 0.057554	CCTCGGAG	0.057554
GCAGCCAC 0.057554	GCAGCCAC	0.057554
TCCCCCCA 0.057554	TCCCCCCA	0.057554
GACGCCGC 0.057554	GACGCCGC	0.057554
CCAGCACC 0.057554	CCAGCACC	0.057554
AGCCCTGC 0.057554	AGCCCTGC	0.057554
GCCCCCCA 0.057554	GCCCCCCA	0.057554
GAAGCGGC 0.057554	GAAGCGGC	0.057554
CCCGTCCC 0.057554	CCCGTCCC	0.057554
CCGCCACG 0.057554	CCGCCACG	0.057554
GGCAGCCA 0.057554	GGCAGCCA	0.057554
GGCCAGGA 0.057554	GGCCAGGA	0.057554
GGCGGGCA 0.057554	GGCGGGCA	0.057554
AGGGGACC 0.057554	AGGGGACC	0.057554
ACACACAG 0.057554	ACACACAG	0.057554
CCAGCTGC 0.0570743	CCAGCTGC	0.0570743
CCCAGCCA 0.0570743	CCCAGCCA	0.0570743
CCCCCAAC 0.0570743	CCCCCAAC	0.0570743
CTGCGCTC 0.0570743	CTGCGCTC	0.0570743
CACCCGCG 0.0570743	CACCCGCG	0.0570743
GGGCGGCA 0.0570743	GGGCGGCA	0.0570743
CGGCCACG 0.0570743	CGGCCACG	0.0570743
CGGGGAGA 0.0570743	CGGGGAGA	0.0570743
CCGGCTTC 0.0570743	CCGGCTTC	0.0570743
GCAGCCCA 0.0570743	GCAGCCCA	0.0570743
AGAGAGGG 0.0570743	AGAGAGGG	0.0570743
AGAGGCTG 0.0570743	AGAGGCTG	0.0570743
AGAGGGCG 0.0570743	AGAGGGCG	0.0570743
CCAACCCC 0.0570743	CCAACCCC	0.0570743
CTCTCCAG 0.0570743	CTCTCCAG	0.0570743
ACCTCCTC 0.0570743	ACCTCCTC	0.0570743
AGCTCCGC 0.0570743	AGCTCCGC	0.0570743
AGGCGAGG 0.0570743	AGGCGAGG	0.0570743
CCCTCCAG 0.0570743	CCCTCCAG	0.0570743
GGAGGCCA 0.0570743	GGAGGCCA	0.0570743
CAGCGCAG 0.0570743	CAGCGCAG	0.0570743
CAGGCTCC 0.0570743	CAGGCTCC	0.0570743
CAGGGCTC 0.0570743	CAGGGCTC	0.0570743
AGGGGAAG 0.0570743	AGGGGAAG	0.0570743
GAGCAGGC 0.0570743	GAGCAGGC	0.0570743
CCCCGACC 0.0565947	CCCCGACC	0.0565947
CTGCCCAG 0.0565947	CTGCCCAG	0.0565947
ACCCCCGC 0.0565947	ACCCCCGC	0.0565947
CACCGGCC 0.0565947	CACCGGCC	0.0565947
CGCCTCTC 0.0565947	CGCCTCTC	0.0565947
AAGAAAAA 0.0565947	AAGAAAAA	0.0565947
CGGCGCAG 0.0565947	CGGCGCAG	0.0565947
CGGGGCCA 0.0565947	CGGGGCCA	0.0565947
CCGGAGCA 0.0565947	CCGGAGCA	0.0565947
CCGTGGCC 0.0565947	CCGTGGCC	0.0565947
CCTCCTCA 0.0565947	CCTCCTCA	0.0565947
GCAGGGAA 0.0565947	GCAGGGAA	0.0565947
AGCAGGAG 0.0565947	AGCAGGAG	0.0565947
AGCCCCTC 0.0565947	AGCCCCTC	0.0565947
AGCCCGGA 0.0565947	AGCCCGGA	0.0565947
AGCCTGGC 0.0565947	AGCCTGGC	0.0565947
CTCAGCTC 0.0565947	CTCAGCTC	0.0565947
CTCGCGCC 0.0565947	CTCGCGCC	0.0565947
GCCACGGC 0.0565947	GCCACGGC	0.0565947
GCCCGCAC 0.0565947	GCCCGCAC	0.0565947
GCCGCGCA 0.0565947	GCCGCGCA	0.0565947
AGCTCGGC 0.0565947	AGCTCGGC	0.0565947
AGGACCAC 0.0565947	AGGACCAC	0.0565947
AGGAGCAG 0.0565947	AGGAGCAG	0.0565947
CCGCTCTC 0.0565947	CCGCTCTC	0.0565947
GGAGCTGA 0.0565947	GGAGCTGA	0.0565947
GGCCCCCC 0.0565947	GGCCCCCC	0.0565947
CAGCAGAG 0.0565947	CAGCAGAG	0.0565947
CAGCTCCA 0.0565947	CAGCTCCA	0.0565947
CAGGAGGA 0.0565947	CAGGAGGA	0.0565947
CAGGGAAG 0.0565947	CAGGGAAG	0.0565947
CCCAGGAA 0.0561151	CCCAGGAA	0.0561151
GCTGCAGC 0.0561151	GCTGCAGC	0.0561151
GGGAGGCA 0.0561151	GGGAGGCA	0.0561151
CGGGCCAC 0.0561151	CGGGCCAC	0.0561151
CCGGCAGG 0.0561151	CCGGCAGG	0.0561151
CCGTCGCC 0.0561151	CCGTCGCC	0.0561151
TCCCAGCA 0.0561151	TCCCAGCA	0.0561151
AGAGCCCG 0.0561151	AGAGCCCG	0.0561151
AGCCGAGG 0.0561151	AGCCGAGG	0.0561151
AGCCGGCC 0.0561151	AGCCGGCC	0.0561151
AGCGGGCC 0.0561151	AGCGGGCC	0.0561151
CTCCCTTC 0.0561151	CTCCCTTC	0.0561151
GCCCAGCA 0.0561151	GCCCAGCA	0.0561151
ACCCGCCC 0.0561151	ACCCGCCC	0.0561151
GGAGCAGA 0.0561151	GGAGCAGA	0.0561151
GGAGGAAA 0.0561151	GGAGGAAA	0.0561151
AGGGGGCC 0.0561151	AGGGGGCC	0.0561151
CCTGCACC 0.0561151	CCTGCACC	0.0561151
GAGGCCAC 0.0561151	GAGGCCAC	0.0561151
GAGGCTGA 0.0561151	GAGGCTGA	0.0561151
CCAGGCGC 0.0556355	CCAGGCGC	0.0556355
GCGCGTCC 0.0556355	GCGCGTCC	0.0556355
GCGGTCCC 0.0556355	GCGGTCCC	0.0556355
CACCCCCG 0.0556355	CACCCCCG	0.0556355
CACCGCGC 0.0556355	CACCGCGC	0.0556355
GGGAGGAC 0.0556355	GGGAGGAC	0.0556355
GGGGGGGA 0.0556355	GGGGGGGA	0.0556355
CGGAGAGC 0.0556355	CGGAGAGC	0.0556355
CGGCGACG 0.0556355	CGGCGACG	0.0556355
CCGGGAAC 0.0556355	CCGGGAAC	0.0556355
AGAGCCGG 0.0556355	AGAGCCGG	0.0556355
CCAGAGGC 0.0556355	CCAGAGGC	0.0556355
AGCCGCCA 0.0556355	AGCCGCCA	0.0556355
CTCCGCCA 0.0556355	CTCCGCCA	0.0556355
CTTTCCTC 0.0556355	CTTTCCTC	0.0556355
AGGCGCCG 0.0556355	AGGCGCCG	0.0556355
AGGCGCGC 0.0556355	AGGCGCGC	0.0556355
AGGCGGGA 0.0556355	AGGCGGGA	0.0556355
GGAAGGCC 0.0556355	GGAAGGCC	0.0556355
GGACCCCC 0.0556355	GGACCCCC	0.0556355
GGAGCGCC 0.0556355	GGAGCGCC	0.0556355
CAGCAGGG 0.0556355	CAGCAGGG	0.0556355
CAGGCGGG 0.0556355	CAGGCGGG	0.0556355
CAGGTGAG 0.0556355	CAGGTGAG	0.0556355
AGGCTGGA 0.0556355	AGGCTGGA	0.0556355
GAGCCCAC 0.0556355	GAGCCCAC	0.0556355
GAGGCCCA 0.0556355	GAGGCCCA	0.0556355
CCAGGCCA 0.0551559	CCAGGCCA	0.0551559
GCTCCCCA 0.0551559	GCTCCCCA	0.0551559
CACCGGGC 0.0551559	CACCGGGC	0.0551559
CGAGGGCG 0.0551559	CGAGGGCG	0.0551559
CGCGAGCG 0.0551559	CGCGAGCG	0.0551559
CGCGGGAC 0.0551559	CGCGGGAC	0.0551559
CGGCCCGA 0.0551559	CGGCCCGA	0.0551559
CGGGAGCA 0.0551559	CGGGAGCA	0.0551559
CGGGGAAG 0.0551559	CGGGGAAG	0.0551559
TCCCTCCA 0.0551559	TCCCTCCA	0.0551559
AGAGCTGC 0.0551559	AGAGCTGC	0.0551559
CCACGCGG 0.0551559	CCACGCGG	0.0551559
AGCAGAGC 0.0551559	AGCAGAGC	0.0551559
CTCCGCAG 0.0551559	CTCCGCAG	0.0551559
CTCTGGCC 0.0551559	CTCTGGCC	0.0551559
GCCAGAGC 0.0551559	GCCAGAGC	0.0551559
CTTCTTCC 0.0551559	CTTCTTCC	0.0551559
AGGAGGAC 0.0551559	AGGAGGAC	0.0551559
CACTTCCG 0.0551559	CACTTCCG	0.0551559
CAGCGAGG 0.0551559	CAGCGAGG	0.0551559
CAGGAAGG 0.0551559	CAGGAAGG	0.0551559
CAGGGAGC 0.0551559	CAGGGAGC	0.0551559
AGGGCTGC 0.0551559	AGGGCTGC	0.0551559
CCAGCGCG 0.0546763	CCAGCGCG	0.0546763
CCCCACAC 0.0546763	CCCCACAC	0.0546763
CCCCATCC 0.0546763	CCCCATCC	0.0546763
AAAGGAAA 0.0546763	AAAGGAAA	0.0546763
GCTCCGGA 0.0546763	GCTCCGGA	0.0546763
CACCCACG 0.0546763	CACCCACG	0.0546763
CACCCCCC 0.0546763	CACCCCCC	0.0546763
GGGACCAC 0.0546763	GGGACCAC	0.0546763
CGCCAGCG 0.0546763	CGCCAGCG	0.0546763
CGCCCGGA 0.0546763	CGCCCGGA	0.0546763
CGGTGCCC 0.0546763	CGGTGCCC	0.0546763
CCGGGGCA 0.0546763	CCGGGGCA	0.0546763
CCGGGTGC 0.0546763	CCGGGTGC	0.0546763
GCACACAC 0.0546763	GCACACAC	0.0546763
AGAGGGGC 0.0546763	AGAGGGGC	0.0546763
AGCCCTCC 0.0546763	AGCCCTCC	0.0546763
CTCCAGGA 0.0546763	CTCCAGGA	0.0546763
GCCAGCGC 0.0546763	GCCAGCGC	0.0546763
GCCCAGGA 0.0546763	GCCCAGGA	0.0546763
GCCTCACC 0.0546763	GCCTCACC	0.0546763
GAAGCCGC 0.0546763	GAAGCCGC	0.0546763
ACCTCCCC 0.0546763	ACCTCCCC	0.0546763
AGCTGCAG 0.0546763	AGCTGCAG	0.0546763
AGGAGCCC 0.0546763	AGGAGCCC	0.0546763
AAGGGGCG 0.0546763	AAGGGGCG	0.0546763
CCCGCGAG 0.0546763	CCCGCGAG	0.0546763
CCCGCGTC 0.0546763	CCCGCGTC	0.0546763
GGAGAGCC 0.0546763	GGAGAGCC	0.0546763
GGCCCCGA 0.0546763	GGCCCCGA	0.0546763
AGGGCCAG 0.0546763	AGGGCCAG	0.0546763
CCTGGGAA 0.0546763	CCTGGGAA	0.0546763
GCGGGAGA 0.0541966	GCGGGAGA	0.0541966
GGGCCGCA 0.0541966	GGGCCGCA	0.0541966
CGAGGGGC 0.0541966	CGAGGGGC	0.0541966
GCAGAGGA 0.0541966	GCAGAGGA	0.0541966
CCACTTCC 0.0541966	CCACTTCC	0.0541966
AGCCGCTG 0.0541966	AGCCGCTG	0.0541966
CTCGCCTC 0.0541966	CTCGCCTC	0.0541966
CTTCTCCC 0.0541966	CTTCTCCC	0.0541966
ACCCGCGC 0.0541966	ACCCGCGC	0.0541966
ACCCGGAG 0.0541966	ACCCGGAG	0.0541966
ACCGCGGC 0.0541966	ACCGCGGC	0.0541966
CCCGCCGA 0.0541966	CCCGCCGA	0.0541966
CCGAGCTC 0.0541966	CCGAGCTC	0.0541966
CCGCCTTC 0.0541966	CCGCCTTC	0.0541966
CCGCTGGC 0.0541966	CCGCTGGC	0.0541966
GGACCTCC 0.0541966	GGACCTCC	0.0541966
GGAGCCGA 0.0541966	GGAGCCGA	0.0541966
GGAGGACC 0.0541966	GGAGGACC	0.0541966
CAGGGACC 0.0541966	CAGGGACC	0.0541966
AGGCTCCG 0.0541966	AGGCTCCG	0.0541966
CCTGGCGC 0.0541966	CCTGGCGC	0.0541966
GAGAGAAA 0.0541966	GAGAGAAA	0.0541966
GAGAGGGC 0.0541966	GAGAGGGC	0.0541966
GAGGAGAA 0.0541966	GAGGAGAA	0.0541966
CCCACACC 0.053717	CCCACACC	0.053717
CCCCACTC 0.053717	CCCCACTC	0.053717
GGGAAGAA 0.053717	GGGAAGAA	0.053717
CGCAGCAG 0.053717	CGCAGCAG	0.053717
CGCCGGCG 0.053717	CGCCGGCG	0.053717
AAGGAGGG 0.053717	AAGGAGGG	0.053717
GACCCGCC 0.053717	GACCCGCC	0.053717
AGCGAGGC 0.053717	AGCGAGGC	0.053717
GCCACGCC 0.053717	GCCACGCC	0.053717
GCCTCCAC 0.053717	GCCTCCAC	0.053717
AGAAAGGA 0.053717	AGAAAGGA	0.053717
CCGCACCG 0.053717	CCGCACCG	0.053717
GGACAGCC 0.053717	GGACAGCC	0.053717
GGAGAGAA 0.053717	GGAGAGAA	0.053717
GGCCCCAC 0.053717	GGCCCCAC	0.053717
GGCGCCCA 0.053717	GGCGCCCA	0.053717
GGCGCCGA 0.053717	GGCGCCGA	0.053717
AGGGAAGC 0.053717	AGGGAAGC	0.053717
GAGAGGGA 0.053717	GAGAGGGA	0.053717
GAGCTGGC 0.053717	GAGCTGGC	0.053717
CCCACACA 0.0532374	CCCACACA	0.0532374
CCCAGGCA 0.0532374	CCCAGGCA	0.0532374
CCCCTCCA 0.0532374	CCCCTCCA	0.0532374
CTGGGGGA 0.0532374	CTGGGGGA	0.0532374
CTGGTGGC 0.0532374	CTGGTGGC	0.0532374
CACCGGGG 0.0532374	CACCGGGG	0.0532374
GGGAGACC 0.0532374	GGGAGACC	0.0532374
GGGGCCCA 0.0532374	GGGGCCCA	0.0532374
GGTGAGGA 0.0532374	GGTGAGGA	0.0532374
AAGGAGGA 0.0532374	AAGGAGGA	0.0532374
CGGGGGTC 0.0532374	CGGGGGTC	0.0532374
AGTCCCGG 0.0532374	AGTCCCGG	0.0532374
GTCCCCAC 0.0532374	GTCCCCAC	0.0532374
CCACCAGG 0.0532374	CCACCAGG	0.0532374
CTCCTCAG 0.0532374	CTCCTCAG	0.0532374
CTCGGCCA 0.0532374	CTCGGCCA	0.0532374
GCCCGGAC 0.0532374	GCCCGGAC	0.0532374
AGGAAGCC 0.0532374	AGGAAGCC	0.0532374
AGGCCAGC 0.0532374	AGGCCAGC	0.0532374
AGGCCTCG 0.0532374	AGGCCTCG	0.0532374
GGCAGGAA 0.0532374	GGCAGGAA	0.0532374
CAGAGCAG 0.0532374	CAGAGCAG	0.0532374
CAGCTTCC 0.0532374	CAGCTTCC	0.0532374
CAGGCTGC 0.0532374	CAGGCTGC	0.0532374
CCTGTCCC 0.0532374	CCTGTCCC	0.0532374
GAGCCCCC 0.0532374	GAGCCCCC	0.0532374
CCAGGACC 0.0527578	CCAGGACC	0.0527578
CTGCAGCA 0.0527578	CTGCAGCA	0.0527578
GCTGAGGA 0.0527578	GCTGAGGA	0.0527578
GCTGGAGA 0.0527578	GCTGGAGA	0.0527578
GCTGGGAC 0.0527578	GCTGGGAC	0.0527578
CACCGCCA 0.0527578	CACCGCCA	0.0527578
GGGGCCGA 0.0527578	GGGGCCGA	0.0527578
GGGTGGCA 0.0527578	GGGTGGCA	0.0527578
CGAGCGAG 0.0527578	CGAGCGAG	0.0527578
CGGCTCTC 0.0527578	CGGCTCTC	0.0527578
CGGGGTGC 0.0527578	CGGGGTGC	0.0527578
CCGGCGTC 0.0527578	CCGGCGTC	0.0527578
AGCAGGCC 0.0527578	AGCAGGCC	0.0527578
AGCCCCCG 0.0527578	AGCCCCCG	0.0527578
AGCGGCTG 0.0527578	AGCGGCTG	0.0527578
CTCCTCAC 0.0527578	CTCCTCAC	0.0527578
GCCCCCCC 0.0527578	GCCCCCCC	0.0527578
GCGAGCGA 0.0527578	GCGAGCGA	0.0527578
AGCTGCCC 0.0527578	AGCTGCCC	0.0527578
AGGAGAAG 0.0527578	AGGAGAAG	0.0527578
CCGCGGTC 0.0527578	CCGCGGTC	0.0527578
GGACAGCA 0.0527578	GGACAGCA	0.0527578
GGAGGGAC 0.0527578	GGAGGGAC	0.0527578
GGCAGGCC 0.0527578	GGCAGGCC	0.0527578
GGCCCACC 0.0527578	GGCCCACC	0.0527578
CAGCCGGC 0.0527578	CAGCCGGC	0.0527578
AGGGCAGC 0.0527578	AGGGCAGC	0.0527578
AGGGCGCC 0.0527578	AGGGCGCC	0.0527578
GAGAGCGC 0.0527578	GAGAGCGC	0.0527578
CCCCCCAA 0.0522782	CCCCCCAA	0.0522782
CTGCCGGC 0.0522782	CTGCCGGC	0.0522782
CTTCCGGC 0.0522782	CTTCCGGC	0.0522782
ACCCCCGG 0.0522782	ACCCCCGG	0.0522782
GCTGCCAC 0.0522782	GCTGCCAC	0.0522782
CACCGAGG 0.0522782	CACCGAGG	0.0522782
GGGCCCGA 0.0522782	GGGCCCGA	0.0522782
GGGGAGCA 0.0522782	GGGGAGCA	0.0522782
GGTCCCCA 0.0522782	GGTCCCCA	0.0522782
CGCCGTCC 0.0522782	CGCCGTCC	0.0522782
CGCCTCCA 0.0522782	CGCCTCCA	0.0522782
CGCCTGGC 0.0522782	CGCCTGGC	0.0522782
CGCCTTCC 0.0522782	CGCCTTCC	0.0522782
CGCTGAGC 0.0522782	CGCTGAGC	0.0522782
CGGGACTC 0.0522782	CGGGACTC	0.0522782
CCGGCCCA 0.0522782	CCGGCCCA	0.0522782
CCGGGTTC 0.0522782	CCGGGTTC	0.0522782
GCACCCGC 0.0522782	GCACCCGC	0.0522782
GACCCGGA 0.0522782	GACCCGGA	0.0522782
CCACCGGC 0.0522782	CCACCGGC	0.0522782
CTCCCGAG 0.0522782	CTCCCGAG	0.0522782
CTCCTTTC 0.0522782	CTCCTTTC	0.0522782
GCCCTCCA 0.0522782	GCCCTCCA	0.0522782
GCGACCCC 0.0522782	GCGACCCC	0.0522782
GAAGAGGA 0.0522782	GAAGAGGA	0.0522782
AGGAGGCA 0.0522782	AGGAGGCA	0.0522782
CCCGGAGA 0.0522782	CCCGGAGA	0.0522782
CCGACCCG 0.0522782	CCGACCCG	0.0522782
CAGACCAC 0.0522782	CAGACCAC	0.0522782
AGGGAAAG 0.0522782	AGGGAAAG	0.0522782
CCAGCGGG 0.0517986	CCAGCGGG	0.0517986
CCATGGCG 0.0517986	CCATGGCG	0.0517986
CCCACCAC 0.0517986	CCCACCAC	0.0517986
CCCCAGCA 0.0517986	CCCCAGCA	0.0517986
CCCCCTCG 0.0517986	CCCCCTCG	0.0517986
CTGCCCAC 0.0517986	CTGCCCAC	0.0517986
CGGGCACC 0.0517986	CGGGCACC	0.0517986
CCGGCGAG 0.0517986	CCGGCGAG	0.0517986
GCACGCGC 0.0517986	GCACGCGC	0.0517986
CCACTGCC 0.0517986	CCACTGCC	0.0517986
AGCACCAG 0.0517986	AGCACCAG	0.0517986
AGCAGCCG 0.0517986	AGCAGCCG	0.0517986
AGCAGGGA 0.0517986	AGCAGGGA	0.0517986
AGCCCCTG 0.0517986	AGCCCCTG	0.0517986
CTCGCTGC 0.0517986	CTCGCTGC	0.0517986
CTCGGAGC 0.0517986	CTCGGAGC	0.0517986
GCCAAGGC 0.0517986	GCCAAGGC	0.0517986
GCCCCCGA 0.0517986	GCCCCCGA	0.0517986
GCCCGCCA 0.0517986	GCCCGCCA	0.0517986
AGAAAGAG 0.0517986	AGAAAGAG	0.0517986
ACCCTCCC 0.0517986	ACCCTCCC	0.0517986
AGCTCCAG 0.0517986	AGCTCCAG	0.0517986
AGCTCCTG 0.0517986	AGCTCCTG	0.0517986
CCGCCTCA 0.0517986	CCGCCTCA	0.0517986
GGCCTGCA 0.0517986	GGCCTGCA	0.0517986
CAGGCGCG 0.0517986	CAGGCGCG	0.0517986
AGGCTGCC 0.0517986	AGGCTGCC	0.0517986
GAGAAAGA 0.0517986	GAGAAAGA	0.0517986
GAGCAGGA 0.0517986	GAGCAGGA	0.0517986
CCCCCCGG 0.0513189	CCCCCCGG	0.0513189
CCCCTCAG 0.0513189	CCCCTCAG	0.0513189
CTGCTGCA 0.0513189	CTGCTGCA	0.0513189
CACAGAGA 0.0513189	CACAGAGA	0.0513189
CACCCCAC 0.0513189	CACCCCAC	0.0513189
GGGAGAAA 0.0513189	GGGAGAAA	0.0513189
GGGCGCCC 0.0513189	GGGCGCCC	0.0513189
GGGGAGAA 0.0513189	GGGGAGAA	0.0513189
ACGGCCGC 0.0513189	ACGGCCGC	0.0513189
CGCGGCAG 0.0513189	CGCGGCAG	0.0513189
CGGCCCCA 0.0513189	CGGCCCCA	0.0513189
CGGGCCCA 0.0513189	CGGGCCCA	0.0513189
CGGTGGGC 0.0513189	CGGTGGGC	0.0513189
CCTCAGGC 0.0513189	CCTCAGGC	0.0513189
AGAGAGAA 0.0513189	AGAGAGAA	0.0513189
CCACGGCG 0.0513189	CCACGGCG	0.0513189
AGCCAGCC 0.0513189	AGCCAGCC	0.0513189
ACCGCGGG 0.0513189	ACCGCGGG	0.0513189
AGCTCCTC 0.0513189	AGCTCCTC	0.0513189
AGGAAGAA 0.0513189	AGGAAGAA	0.0513189
GGAAGAGA 0.0513189	GGAAGAGA	0.0513189
GGCCCGCA 0.0513189	GGCCCGCA	0.0513189
CAGAGAAA 0.0513189	CAGAGAAA	0.0513189
CAGCGGAG 0.0513189	CAGCGGAG	0.0513189
CAGCTGGG 0.0513189	CAGCTGGG	0.0513189
AGGGGGGC 0.0513189	AGGGGGGC	0.0513189
AGGTGGAG 0.0513189	AGGTGGAG	0.0513189
AGGTGGCC 0.0513189	AGGTGGCC	0.0513189
ACAGCCCC 0.0513189	ACAGCCCC	0.0513189
CCTGGCAG 0.0513189	CCTGGCAG	0.0513189
GAGCAGCA 0.0513189	GAGCAGCA	0.0513189
GAGGACGC 0.0513189	GAGGACGC	0.0513189
CAAGATGG 0.0513189	CAAGATGG	0.0513189
CCCACTGC 0.0508393	CCCACTGC	0.0508393
CCCCTCAC 0.0508393	CCCCTCAC	0.0508393
CTTCCCCA 0.0508393	CTTCCCCA	0.0508393
ACCCAGCC 0.0508393	ACCCAGCC	0.0508393
GCGCGGAC 0.0508393	GCGCGGAC	0.0508393
GCGGGCAC 0.0508393	GCGGGCAC	0.0508393
CGCCGCGA 0.0508393	CGCCGCGA	0.0508393
CGCGCACG 0.0508393	CGCGCACG	0.0508393
ACGGCGGG 0.0508393	ACGGCGGG	0.0508393
CGGACGCC 0.0508393	CGGACGCC	0.0508393
CGGCAGGC 0.0508393	CGGCAGGC	0.0508393
CGGCTGCA 0.0508393	CGGCTGCA	0.0508393
CGGGGCGA 0.0508393	CGGGGCGA	0.0508393
AGAGCTGG 0.0508393	AGAGCTGG	0.0508393
CCACCCAA 0.0508393	CCACCCAA	0.0508393
AGCCTCAG 0.0508393	AGCCTCAG	0.0508393
AGCCTCGC 0.0508393	AGCCTCGC	0.0508393
CTCCCGCA 0.0508393	CTCCCGCA	0.0508393
GCCCACGC 0.0508393	GCCCACGC	0.0508393
GCCGGCGA 0.0508393	GCCGGCGA	0.0508393
GCCGTCGC 0.0508393	GCCGTCGC	0.0508393
GCCTTTCC 0.0508393	GCCTTTCC	0.0508393
CTTTTCCC 0.0508393	CTTTTCCC	0.0508393
GAAGCAGC 0.0508393	GAAGCAGC	0.0508393
GAAGCTGC 0.0508393	GAAGCTGC	0.0508393
AGGCAGCG 0.0508393	AGGCAGCG	0.0508393
CCCTTCTC 0.0508393	CCCTTCTC	0.0508393
CCGCCGGA 0.0508393	CCGCCGGA	0.0508393
GGAAGCCC 0.0508393	GGAAGCCC	0.0508393
CAGAGGGA 0.0508393	CAGAGGGA	0.0508393
CAGCCGAG 0.0508393	CAGCCGAG	0.0508393
CAGCTGGA 0.0508393	CAGCTGGA	0.0508393
ACAGCTCC 0.0508393	ACAGCTCC	0.0508393
CCTTCCAG 0.0508393	CCTTCCAG	0.0508393
CCCAGGGG 0.0503597	CCCAGGGG	0.0503597
CCCCTGCG 0.0503597	CCCCTGCG	0.0503597
AAAGAAAG 0.0503597	AAAGAAAG	0.0503597
CTGCAGGA 0.0503597	CTGCAGGA	0.0503597
CTGGGGTC 0.0503597	CTGGGGTC	0.0503597
ACCCACAG 0.0503597	ACCCACAG	0.0503597
GCGCTTCC 0.0503597	GCGCTTCC	0.0503597
GCGGCGCA 0.0503597	GCGGCGCA	0.0503597
CACCCAGA 0.0503597	CACCCAGA	0.0503597
GGGGCCCC 0.0503597	GGGGCCCC	0.0503597
AAGGAAGG 0.0503597	AAGGAAGG	0.0503597
CGGCAGCA 0.0503597	CGGCAGCA	0.0503597
CCGGAGAC 0.0503597	CCGGAGAC	0.0503597
CCTCTCCA 0.0503597	CCTCTCCA	0.0503597
AGAGGAGC 0.0503597	AGAGGAGC	0.0503597
AGCAGCCT 0.0503597	AGCAGCCT	0.0503597
GCCAGGGA 0.0503597	GCCAGGGA	0.0503597
GCCCTGGA 0.0503597	GCCCTGGA	0.0503597
GCCGGCCA 0.0503597	GCCGGCCA	0.0503597
GAAGCCCC 0.0503597	GAAGCCCC	0.0503597
CCCGGGCA 0.0503597	CCCGGGCA	0.0503597
CCGCGCCA 0.0503597	CCGCGCCA	0.0503597
GGAAGAAA 0.0503597	GGAAGAAA	0.0503597
GGAGGCGA 0.0503597	GGAGGCGA	0.0503597
GGAGTCCC 0.0503597	GGAGTCCC	0.0503597
GGCCGCAC 0.0503597	GGCCGCAC	0.0503597
CAGAGGAG 0.0503597	CAGAGGAG	0.0503597
CAGAGGCA 0.0503597	CAGAGGCA	0.0503597
CAGCGAGC 0.0503597	CAGCGAGC	0.0503597
CAGGCCAC 0.0503597	CAGGCCAC	0.0503597
AGGCTCGG 0.0503597	AGGCTCGG	0.0503597
ACAGCAGC 0.0503597	ACAGCAGC	0.0503597
CCTTGGCC 0.0503597	CCTTGGCC	0.0503597
GAGGGCCC 0.0503597	GAGGGCCC	0.0503597
GAGGGGAA 0.0503597	GAGGGGAA	0.0503597
GAGGTCCC 0.0503597	GAGGTCCC	0.0503597
CCCCAAGC 0.0498801	CCCCAAGC	0.0498801
CCCCGCGA 0.0498801	CCCCGCGA	0.0498801
GCGGCCCA 0.0498801	GCGGCCCA	0.0498801
GCGGGGAA 0.0498801	GCGGGGAA	0.0498801
GCTCGGGA 0.0498801	GCTCGGGA	0.0498801
CACACACC 0.0498801	CACACACC	0.0498801
GGGGGAGA 0.0498801	GGGGGAGA	0.0498801
CGCGCCCA 0.0498801	CGCGCCCA	0.0498801
AAGAGGAG 0.0498801	AAGAGGAG	0.0498801
ACGCGGGG 0.0498801	ACGCGGGG	0.0498801
CCGGAGAG 0.0498801	CCGGAGAG	0.0498801
CCGGGTCG 0.0498801	CCGGGTCG	0.0498801
CCGTGGGC 0.0498801	CCGTGGGC	0.0498801
GCACCAGC 0.0498801	GCACCAGC	0.0498801
GCCCTTCC 0.0498801	GCCCTTCC	0.0498801
GCCGCGAC 0.0498801	GCCGCGAC	0.0498801
AGAAAGGG 0.0498801	AGAAAGGG	0.0498801
ACCCGCCG 0.0498801	ACCCGCCG	0.0498801
AGGAAGGC 0.0498801	AGGAAGGC	0.0498801
CCGCACGC 0.0498801	CCGCACGC	0.0498801
AGGGGCCC 0.0498801	AGGGGCCC	0.0498801
CCTTCCGC 0.0498801	CCTTCCGC	0.0498801
GAGCCAGC 0.0498801	GAGCCAGC	0.0498801
CCAGGGAC 0.0494005	CCAGGGAC	0.0494005
CCATCCCC 0.0494005	CCATCCCC	0.0494005
CCCAGAGG 0.0494005	CCCAGAGG	0.0494005
CTGGGCCA 0.0494005	CTGGGCCA	0.0494005
GGCTGAGA 0.0494005	GGCTGAGA	0.0494005
GGGACACC 0.0494005	GGGACACC	0.0494005
GGGGAAGA 0.0494005	GGGGAAGA	0.0494005
GGTGGCCA 0.0494005	GGTGGCCA	0.0494005
CGCAGAGC 0.0494005	CGCAGAGC	0.0494005
AAGGAAAA 0.0494005	AAGGAAAA	0.0494005
ACGCCGCG 0.0494005	ACGCCGCG	0.0494005
CGCGCGTC 0.0494005	CGCGCGTC	0.0494005
CGCGGTCC 0.0494005	CGCGGTCC	0.0494005
CGCTCACC 0.0494005	CGCTCACC	0.0494005
CGGAAGCC 0.0494005	CGGAAGCC	0.0494005
CGGCTCCA 0.0494005	CGGCTCCA	0.0494005
CGGGGGAC 0.0494005	CGGGGGAC	0.0494005
CCGGACGC 0.0494005	CCGGACGC	0.0494005
CCGGGACA 0.0494005	CCGGGACA	0.0494005
GCACCTCC 0.0494005	GCACCTCC	0.0494005
CCAGCCAC 0.0494005	CCAGCCAC	0.0494005
AGCCCAGA 0.0494005	AGCCCAGA	0.0494005
AGCCTCGG 0.0494005	AGCCTCGG	0.0494005
AGCGCAGG 0.0494005	AGCGCAGG	0.0494005
CTCGGGGA 0.0494005	CTCGGGGA	0.0494005
CTCTCGCC 0.0494005	CTCTCGCC	0.0494005
CTCTCTGC 0.0494005	CTCTCTGC	0.0494005
CTTTCCCC 0.0494005	CTTTCCCC	0.0494005
AGGAAAAG 0.0494005	AGGAAAAG	0.0494005
CCCTCTTC 0.0494005	CCCTCTTC	0.0494005
CCGAGAGC 0.0494005	CCGAGAGC	0.0494005
GGACCCCA 0.0494005	GGACCCCA	0.0494005
GGCAGGCA 0.0494005	GGCAGGCA	0.0494005
CAGCTCTC 0.0494005	CAGCTCTC	0.0494005
CCAGGGGG 0.0489209	CCAGGGGG	0.0489209
CCCCACCA 0.0489209	CCCCACCA	0.0489209
CCCCCCAG 0.0489209	CCCCCCAG	0.0489209
CCCCTTTC 0.0489209	CCCCTTTC	0.0489209
CTGGGACC 0.0489209	CTGGGACC	0.0489209
ACCCCACC 0.0489209	ACCCCACC	0.0489209
GCTCTGCA 0.0489209	GCTCTGCA	0.0489209
GGGCGGAC 0.0489209	GGGCGGAC	0.0489209
GGGCTCCA 0.0489209	GGGCTCCA	0.0489209
CGCACGCC 0.0489209	CGCACGCC	0.0489209
CGCACGCG 0.0489209	CGCACGCG	0.0489209
CGCGACCC 0.0489209	CGCGACCC	0.0489209
CGCGCGAG 0.0489209	CGCGCGAG	0.0489209
ACGCGGCG 0.0489209	ACGCGGCG	0.0489209
CGGGACCG 0.0489209	CGGGACCG	0.0489209
GTGCTGAA 0.0489209	GTGCTGAA	0.0489209
CGGGTGAG 0.0489209	CGGGTGAG	0.0489209
CCAAGCCC 0.0489209	CCAAGCCC	0.0489209
AGCCACCG 0.0489209	AGCCACCG	0.0489209
CTCACCCC 0.0489209	CTCACCCC	0.0489209
GCGCCCCA 0.0489209	GCGCCCCA	0.0489209
ACCGGGCC 0.0489209	ACCGGGCC	0.0489209
AGCTCCCG 0.0489209	AGCTCCCG	0.0489209
CCCTGAGC 0.0489209	CCCTGAGC	0.0489209
CCGCTGTC 0.0489209	CCGCTGTC	0.0489209
GGAAAGGA 0.0489209	GGAAAGGA	0.0489209
GGAGGTGA 0.0489209	GGAGGTGA	0.0489209
GGCGTCCC 0.0489209	GGCGTCCC	0.0489209
CAGAGAGA 0.0489209	CAGAGAGA	0.0489209
CAGAGCCG 0.0489209	CAGAGCCG	0.0489209
CAGCACCC 0.0489209	CAGCACCC	0.0489209
CAGGGGCG 0.0489209	CAGGGGCG	0.0489209
CAGGTGGG 0.0489209	CAGGTGGG	0.0489209
AGGCTGCG 0.0489209	AGGCTGCG	0.0489209
AGGGCGGA 0.0489209	AGGGCGGA	0.0489209
GAGAAGGA 0.0489209	GAGAAGGA	0.0489209
GAGAGAGC 0.0489209	GAGAGAGC	0.0489209
CCCCCGGA 0.0484412	CCCCCGGA	0.0484412
GCTCCGCA 0.0484412	GCTCCGCA	0.0484412
CACAGGCC 0.0484412	CACAGGCC	0.0484412
CACGGCCC 0.0484412	CACGGCCC	0.0484412
CACGGCGG 0.0484412	CACGGCGG	0.0484412
GGGCCCCA 0.0484412	GGGCCCCA	0.0484412
CGAGGCGC 0.0484412	CGAGGCGC	0.0484412
CGCCCGAG 0.0484412	CGCCCGAG	0.0484412
CGCTCTGC 0.0484412	CGCTCTGC	0.0484412
CGGAGCTC 0.0484412	CGGAGCTC	0.0484412
CGGAGGAC 0.0484412	CGGAGGAC	0.0484412
CCGGGCGA 0.0484412	CCGGGCGA	0.0484412
GCACAGCC 0.0484412	GCACAGCC	0.0484412
GCACCGGC 0.0484412	GCACCGGC	0.0484412
AGCAGGGC 0.0484412	AGCAGGGC	0.0484412
AGCGGCTC 0.0484412	AGCGGCTC	0.0484412
CTCCTGCA 0.0484412	CTCCTGCA	0.0484412
GCCTGAGC 0.0484412	GCCTGAGC	0.0484412
AGCTCGGG 0.0484412	AGCTCGGG	0.0484412
CCGCGGCA 0.0484412	CCGCGGCA	0.0484412
CAGAGAGG 0.0484412	CAGAGAGG	0.0484412
AGGGCGAG 0.0484412	AGGGCGAG	0.0484412
AGGGGCAG 0.0484412	AGGGGCAG	0.0484412
CCTGCTTC 0.0484412	CCTGCTTC	0.0484412
CCTGGAGA 0.0484412	CCTGGAGA	0.0484412
CCTTCCCA 0.0484412	CCTTCCCA	0.0484412
GAGCCCGA 0.0484412	GAGCCCGA	0.0484412
GAGGAAAA 0.0484412	GAGGAAAA	0.0484412
TCTCCCCA 0.0484412	TCTCCCCA	0.0484412
CCCCGGCA 0.0479616	CCCCGGCA	0.0479616
CTGCTCGC 0.0479616	CTGCTCGC	0.0479616
ACCCCCAG 0.0479616	ACCCCCAG	0.0479616
GCGGAGCA 0.0479616	GCGGAGCA	0.0479616
GCTGCCCA 0.0479616	GCTGCCCA	0.0479616
GGGAGCCA 0.0479616	GGGAGCCA	0.0479616
AAGAAGGG 0.0479616	AAGAAGGG	0.0479616
CGCGGACC 0.0479616	CGCGGACC	0.0479616
CGGCTGGC 0.0479616	CGGCTGGC	0.0479616
CCGTGGCG 0.0479616	CCGTGGCG	0.0479616
CCACGCGC 0.0479616	CCACGCGC	0.0479616
CCAGAGAG 0.0479616	CCAGAGAG	0.0479616
AGCAGCTC 0.0479616	AGCAGCTC	0.0479616
CTCCAGAG 0.0479616	CTCCAGAG	0.0479616
GCCCGGCA 0.0479616	GCCCGGCA	0.0479616
AGAAAGAA 0.0479616	AGAAAGAA	0.0479616
GAAGGAGA 0.0479616	GAAGGAGA	0.0479616
ACCCGGGA 0.0479616	ACCCGGGA	0.0479616
AGCTCTCC 0.0479616	AGCTCTCC	0.0479616
AGGAGCGC 0.0479616	AGGAGCGC	0.0479616
AGGCCCCC 0.0479616	AGGCCCCC	0.0479616
CCCGCTTC 0.0479616	CCCGCTTC	0.0479616
CCCTGGCG 0.0479616	CCCTGGCG	0.0479616
CCGAGAGG 0.0479616	CCGAGAGG	0.0479616
CCGCCCGA 0.0479616	CCGCCCGA	0.0479616
CCGGAACC 0.0479616	CCGGAACC	0.0479616
CAGGACCC 0.0479616	CAGGACCC	0.0479616
AGGGGAGC 0.0479616	AGGGGAGC	0.0479616
AGGTGGCG 0.0479616	AGGTGGCG	0.0479616
CCTGAGGC 0.0479616	CCTGAGGC	0.0479616
GAGGTGGA 0.0479616	GAGGTGGA	0.0479616
CCCACAGG 0.047482	CCCACAGG	0.047482
CCCAGGTC 0.047482	CCCAGGTC	0.047482
CCCCGTCC 0.047482	CCCCGTCC	0.047482
CTGCCTTC 0.047482	CTGCCTTC	0.047482
CTGGCTTC 0.047482	CTGGCTTC	0.047482
ACCCCAGG 0.047482	ACCCCAGG	0.047482
CACCCAAG 0.047482	CACCCAAG	0.047482
CACGCGGG 0.047482	CACGCGGG	0.047482
GGGAAGCA 0.047482	GGGAAGCA	0.047482
GGGCACCC 0.047482	GGGCACCC	0.047482
CGCGCCAC 0.047482	CGCGCCAC	0.047482
AAGCCGCC 0.047482	AAGCCGCC	0.047482
ACGCGGCC 0.047482	ACGCGGCC	0.047482
CGCTTCCG 0.047482	CGCTTCCG	0.047482
CGGGAACC 0.047482	CGGGAACC	0.047482
CGTGGGGC 0.047482	CGTGGGGC	0.047482
GCACCACC 0.047482	GCACCACC	0.047482
AGTGGGGG 0.047482	AGTGGGGG	0.047482
GACCGGGC 0.047482	GACCGGGC	0.047482
CCACACAG 0.047482	CCACACAG	0.047482
CCACTCCC 0.047482	CCACTCCC	0.047482
AGCCGCTC 0.047482	AGCCGCTC	0.047482
AGCGCCCG 0.047482	AGCGCCCG	0.047482
CTCTCGGC 0.047482	CTCTCGGC	0.047482
ACCCGCGG 0.047482	ACCCGCGG	0.047482
ACCCTGGG 0.047482	ACCCTGGG	0.047482
AGCTCCCC 0.047482	AGCTCCCC	0.047482
AGCTGAGG 0.047482	AGCTGAGG	0.047482
AGGAGAGA 0.047482	AGGAGAGA	0.047482
CCCTGTCC 0.047482	CCCTGTCC	0.047482
CCGCAGCA 0.047482	CCGCAGCA	0.047482
GGCCCCCA 0.047482	GGCCCCCA	0.047482
CAGGGCCA 0.047482	CAGGGCCA	0.047482
AGGGAGCC 0.047482	AGGGAGCC	0.047482
AGGTGAGC 0.047482	AGGTGAGC	0.047482
ACAGAAAA 0.047482	ACAGAAAA	0.047482
TGGGGACA 0.047482	TGGGGACA	0.047482
CCAGCGAG 0.0470024	CCAGCGAG	0.0470024
CCAGCTCG 0.0470024	CCAGCTCG	0.0470024
CCAGGGGA 0.0470024	CCAGGGGA	0.0470024
CCCACCAG 0.0470024	CCCACCAG	0.0470024
CCCAGACC 0.0470024	CCCAGACC	0.0470024
CCCCCACG 0.0470024	CCCCCACG	0.0470024
CCCGAGGA 0.0470024	CCCGAGGA	0.0470024
ACTCACCT 0.0470024	ACTCACCT	0.0470024
ACCCACCC 0.0470024	ACCCACCC	0.0470024
GCGCTGCA 0.0470024	GCGCTGCA	0.0470024
GCTCCCAC 0.0470024	GCTCCCAC	0.0470024
GCTGGACC 0.0470024	GCTGGACC	0.0470024
CGAGGCCA 0.0470024	CGAGGCCA	0.0470024
CGCAGCCA 0.0470024	CGCAGCCA	0.0470024
CGCCTCAC 0.0470024	CGCCTCAC	0.0470024
CCTCAGCA 0.0470024	CCTCAGCA	0.0470024
GCAGGGCA 0.0470024	GCAGGGCA	0.0470024
TCCCTGCA 0.0470024	TCCCTGCA	0.0470024
GAAGGGCC 0.0470024	GAAGGGCC	0.0470024
GAAGGGGA 0.0470024	GAAGGGGA	0.0470024
AGAGCGCG 0.0470024	AGAGCGCG	0.0470024
AGCAGCTG 0.0470024	AGCAGCTG	0.0470024
CTCCACTC 0.0470024	CTCCACTC	0.0470024
GCCCACAC 0.0470024	GCCCACAC	0.0470024
GCGCCGGA 0.0470024	GCGCCGGA	0.0470024
AGAAGGAG 0.0470024	AGAAGGAG	0.0470024
AGAAGGGG 0.0470024	AGAAGGGG	0.0470024
GAAAGAAA 0.0470024	GAAAGAAA	0.0470024
AGCTGGGA 0.0470024	AGCTGGGA	0.0470024
AGGCCGGA 0.0470024	AGGCCGGA	0.0470024
CCCTCAGG 0.0470024	CCCTCAGG	0.0470024
CCCTCGCG 0.0470024	CCCTCGCG	0.0470024
CAGGGAGA 0.0470024	CAGGGAGA	0.0470024
CGACGGCG 0.0470024	CGACGGCG	0.0470024
CAAGGCCC 0.0470024	CAAGGCCC	0.0470024
CTGAGGGC 0.0465228	CTGAGGGC	0.0465228
CTGCTGGA 0.0465228	CTGCTGGA	0.0465228
CTGGGTCC 0.0465228	CTGGGTCC	0.0465228
ACCCAGGA 0.0465228	ACCCAGGA	0.0465228
CACCCGGA 0.0465228	CACCCGGA	0.0465228
GGGCGCCA 0.0465228	GGGCGCCA	0.0465228
CGCACCCC 0.0465228	CGCACCCC	0.0465228
CGCCCCGA 0.0465228	CGCCCCGA	0.0465228
AAGCCCCG 0.0465228	AAGCCCCG	0.0465228
CGGCTGAG 0.0465228	CGGCTGAG	0.0465228
GTGGAGGA 0.0465228	GTGGAGGA	0.0465228
CCTCCCAA 0.0465228	CCTCCCAA	0.0465228
GCAGCGGA 0.0465228	GCAGCGGA	0.0465228
GCAGGAGA 0.0465228	GCAGGAGA	0.0465228
AGTGGAGG 0.0465228	AGTGGAGG	0.0465228
TCCCCGCA 0.0465228	TCCCCGCA	0.0465228
TCCTCCCA 0.0465228	TCCTCCCA	0.0465228
CATCCTCC 0.0465228	CATCCTCC	0.0465228
AGAGCCAG 0.0465228	AGAGCCAG	0.0465228
AGAGGAAA 0.0465228	AGAGGAAA	0.0465228
AGAGGTGG 0.0465228	AGAGGTGG	0.0465228
CCACCTGC 0.0465228	CCACCTGC	0.0465228
AGCAGCAC 0.0465228	AGCAGCAC	0.0465228
AGCCCCAC 0.0465228	AGCCCCAC	0.0465228
CTCCGAGC 0.0465228	CTCCGAGC	0.0465228
CTCTCCCA 0.0465228	CTCTCCCA	0.0465228
GCGCCAGC 0.0465228	GCGCCAGC	0.0465228
GCGCCGCA 0.0465228	GCGCCGCA	0.0465228
AGAAAAAA 0.0465228	AGAAAAAA	0.0465228
AGGAGAGC 0.0465228	AGGAGAGC	0.0465228
CCGCGGAC 0.0465228	CCGCGGAC	0.0465228
GGCCGAGA 0.0465228	GGCCGAGA	0.0465228
GGCGGTGA 0.0465228	GGCGGTGA	0.0465228
CAGGCGCC 0.0465228	CAGGCGCC	0.0465228
AGGGCCCC 0.0465228	AGGGCCCC	0.0465228
ACAGCTGG 0.0465228	ACAGCTGG	0.0465228
CCTGGCCA 0.0465228	CCTGGCCA	0.0465228
CCTGGGTC 0.0465228	CCTGGGTC	0.0465228
GAGAAGGC 0.0465228	GAGAAGGC	0.0465228
GAGCCCCA 0.0465228	GAGCCCCA	0.0465228
GAGGACCC 0.0465228	GAGGACCC	0.0465228
CTGCACCC 0.0460432	CTGCACCC	0.0460432
CTGCTCCA 0.0460432	CTGCTCCA	0.0460432
CTGGCGCC 0.0460432	CTGGCGCC	0.0460432
GCTCCACC 0.0460432	GCTCCACC	0.0460432
GCTGCGGA 0.0460432	GCTGCGGA	0.0460432
GCTGGGCA 0.0460432	GCTGGGCA	0.0460432
GCTTTCCC 0.0460432	GCTTTCCC	0.0460432
GGAAAAAA 0.0460432	GGAAAAAA	0.0460432
CACCTCCG 0.0460432	CACCTCCG	0.0460432
CACCTTCC 0.0460432	CACCTTCC	0.0460432
GGCTCCCA 0.0460432	GGCTCCCA	0.0460432
CGCCGCAC 0.0460432	CGCCGCAC	0.0460432
AAGCAGAG 0.0460432	AAGCAGAG	0.0460432
AAGCCAGG 0.0460432	AAGCCAGG	0.0460432
AAGGAGAG 0.0460432	AAGGAGAG	0.0460432
CGCGGAGA 0.0460432	CGCGGAGA	0.0460432
CGGACCCC 0.0460432	CGGACCCC	0.0460432
CGTCCGCC 0.0460432	CGTCCGCC	0.0460432
CCGGCGAC 0.0460432	CCGGCGAC	0.0460432
CCGGTTCC 0.0460432	CCGGTTCC	0.0460432
CCGTCTCC 0.0460432	CCGTCTCC	0.0460432
CCTCCATC 0.0460432	CCTCCATC	0.0460432
CCTCTCGC 0.0460432	CCTCTCGC	0.0460432
GCAGAAGC 0.0460432	GCAGAAGC	0.0460432
TCCCGGGA 0.0460432	TCCCGGGA	0.0460432
AGAGAAAA 0.0460432	AGAGAAAA	0.0460432
AGAGCAGG 0.0460432	AGAGCAGG	0.0460432
AGCCTCTG 0.0460432	AGCCTCTG	0.0460432
CTCTGCGC 0.0460432	CTCTGCGC	0.0460432
CTCTGTCC 0.0460432	CTCTGTCC	0.0460432
GCCGCAGA 0.0460432	GCCGCAGA	0.0460432
ACCCCTCC 0.0460432	ACCCCTCC	0.0460432
GGCCGGAC 0.0460432	GGCCGGAC	0.0460432
CAGGAGAG 0.0460432	CAGGAGAG	0.0460432
AGGCTCCC 0.0460432	AGGCTCCC	0.0460432
AGGGCTCC 0.0460432	AGGGCTCC	0.0460432
AGGGTCCC 0.0460432	AGGGTCCC	0.0460432
GAGAAGCC 0.0460432	GAGAAGCC	0.0460432
GAGGAGAC 0.0460432	GAGGAGAC	0.0460432
GAGGGCGA 0.0460432	GAGGGCGA	0.0460432
GAGTCCCC 0.0460432	GAGTCCCC	0.0460432
CCAGGGCA 0.0455635	CCAGGGCA	0.0455635
CCAGGGTC 0.0455635	CCAGGGTC	0.0455635
CCATGGCC 0.0455635	CCATGGCC	0.0455635
CCCAAGCC 0.0455635	CCCAAGCC	0.0455635
CCCCACAG 0.0455635	CCCCACAG	0.0455635
ACCAGCCC 0.0455635	ACCAGCCC	0.0455635
ACCCCAGC 0.0455635	ACCCCAGC	0.0455635
CACACAGA 0.0455635	CACACAGA	0.0455635
CACCCCAG 0.0455635	CACCCCAG	0.0455635
CACCCCTC 0.0455635	CACCCCTC	0.0455635
CACCGGGA 0.0455635	CACCGGGA	0.0455635
CACGGCCG 0.0455635	CACGGCCG	0.0455635
GGCTGGAC 0.0455635	GGCTGGAC	0.0455635
GGGCCTCA 0.0455635	GGGCCTCA	0.0455635
CGAGCCTC 0.0455635	CGAGCCTC	0.0455635
CGAGGGCC 0.0455635	CGAGGGCC	0.0455635
CGCCCACG 0.0455635	CGCCCACG	0.0455635
AAGAAAAG 0.0455635	AAGAAAAG	0.0455635
AAGGAGGC 0.0455635	AAGGAGGC	0.0455635
CGCGGGTC 0.0455635	CGCGGGTC	0.0455635
CGGAGTCC 0.0455635	CGGAGTCC	0.0455635
CGGCGCCA 0.0455635	CGGCGCCA	0.0455635
CCTCTGTC 0.0455635	CCTCTGTC	0.0455635
GCAGTGGC 0.0455635	GCAGTGGC	0.0455635
TCCCCGGA 0.0455635	TCCCCGGA	0.0455635
CAGTCCCC 0.0455635	CAGTCCCC	0.0455635
AGAGGGGG 0.0455635	AGAGGGGG	0.0455635
AGCAGGGG 0.0455635	AGCAGGGG	0.0455635
GCCCTGCA 0.0455635	GCCCTGCA	0.0455635
GAAAGGGA 0.0455635	GAAAGGGA	0.0455635
ACCGCAGC 0.0455635	ACCGCAGC	0.0455635
ACCGGGGC 0.0455635	ACCGGGGC	0.0455635
ACCTCCCG 0.0455635	ACCTCCCG	0.0455635
AGGAGCCA 0.0455635	AGGAGCCA	0.0455635
CCGAAGCC 0.0455635	CCGAAGCC	0.0455635
GGAGAAGA 0.0455635	GGAGAAGA	0.0455635
CAGCGCCA 0.0455635	CAGCGCCA	0.0455635
CAGGCGGA 0.0455635	CAGGCGGA	0.0455635
CAGGGGCC 0.0455635	CAGGGGCC	0.0455635
CCTTTTCC 0.0455635	CCTTTTCC	0.0455635
CCCACGCG 0.0450839	CCCACGCG	0.0450839
CTGGCCAC 0.0450839	CTGGCCAC	0.0450839
CACACAGC 0.0450839	CACACAGC	0.0450839
CACACAGG 0.0450839	CACACAGG	0.0450839
CACGCGCG 0.0450839	CACGCGCG	0.0450839
GGGAGCGA 0.0450839	GGGAGCGA	0.0450839
CGAGCAGC 0.0450839	CGAGCAGC	0.0450839
CGAGGGAG 0.0450839	CGAGGGAG	0.0450839
CGCGCACC 0.0450839	CGCGCACC	0.0450839
AAGGCGGC 0.0450839	AAGGCGGC	0.0450839
CGGGTGCC 0.0450839	CGGGTGCC	0.0450839
CCTCCGCA 0.0450839	CCTCCGCA	0.0450839
GCAGGGAC 0.0450839	GCAGGGAC	0.0450839
GAAGGGAA 0.0450839	GAAGGGAA	0.0450839
AGACAGAG 0.0450839	AGACAGAG	0.0450839
AGAGCCTG 0.0450839	AGAGCCTG	0.0450839
AGAGCGGC 0.0450839	AGAGCGGC	0.0450839
CCACAGAG 0.0450839	CCACAGAG	0.0450839
AGCGCCTC 0.0450839	AGCGCCTC	0.0450839
ACCCGGAA 0.0450839	ACCCGGAA	0.0450839
ACCGGAAG 0.0450839	ACCGGAAG	0.0450839
AGCTCTGG 0.0450839	AGCTCTGG	0.0450839
AGCTGTGG 0.0450839	AGCTGTGG	0.0450839
CCGACTCC 0.0450839	CCGACTCC	0.0450839
CCGCAGGA 0.0450839	CCGCAGGA	0.0450839
CCGCGCAC 0.0450839	CCGCGCAC	0.0450839
CAGAGCTC 0.0450839	CAGAGCTC	0.0450839
AGGGAAGA 0.0450839	AGGGAAGA	0.0450839
AGGGGGTG 0.0450839	AGGGGGTG	0.0450839
ACAGCCCG 0.0450839	ACAGCCCG	0.0450839
GAGGGAAA 0.0450839	GAGGGAAA	0.0450839
CCCAGAGA 0.0446043	CCCAGAGA	0.0446043
CCCCCAAG 0.0446043	CCCCCAAG	0.0446043
CCCCGGAC 0.0446043	CCCCGGAC	0.0446043
CCCGAGTC 0.0446043	CCCGAGTC	0.0446043
CTGTCTCC 0.0446043	CTGTCTCC	0.0446043
GCGCGCGA 0.0446043	GCGCGCGA	0.0446043
GCGGAAGC 0.0446043	GCGGAAGC	0.0446043
GCGGACGC 0.0446043	GCGGACGC	0.0446043
GCGGAGAC 0.0446043	GCGGAGAC	0.0446043
GCGGCTGA 0.0446043	GCGGCTGA	0.0446043
GCGTCGCC 0.0446043	GCGTCGCC	0.0446043
GCTGCTGA 0.0446043	GCTGCTGA	0.0446043
CACGCGGC 0.0446043	CACGCGGC	0.0446043
CACGGGGC 0.0446043	CACGGGGC	0.0446043
GGCTCCAC 0.0446043	GGCTCCAC	0.0446043
GGGACAGA 0.0446043	GGGACAGA	0.0446043
GGGGCCAC 0.0446043	GGGGCCAC	0.0446043
GGGGGACC 0.0446043	GGGGGACC	0.0446043
GGGGGCGA 0.0446043	GGGGGCGA	0.0446043
CGAGCTGC 0.0446043	CGAGCTGC	0.0446043
ACGCCCCC 0.0446043	ACGCCCCC	0.0446043
ACGCGCGG 0.0446043	ACGCGCGG	0.0446043
CGCGCTTC 0.0446043	CGCGCTTC	0.0446043
CGGACCCG 0.0446043	CGGACCCG	0.0446043
CGGCGACC 0.0446043	CGGCGACC	0.0446043
CGGCGTGC 0.0446043	CGGCGTGC	0.0446043
GCACGGCC 0.0446043	GCACGGCC	0.0446043
GCAGCAGA 0.0446043	GCAGCAGA	0.0446043
GACGGGGC 0.0446043	GACGGGGC	0.0446043
AGAGCAGC 0.0446043	AGAGCAGC	0.0446043
AGAGCGAG 0.0446043	AGAGCGAG	0.0446043
CTCGCAGC 0.0446043	CTCGCAGC	0.0446043
AGAAGAGG 0.0446043	AGAAGAGG	0.0446043
AGGACAGC 0.0446043	AGGACAGC	0.0446043
AAGGCTGG 0.0446043	AAGGCTGG	0.0446043
AAGGTGAG 0.0446043	AAGGTGAG	0.0446043
CCCTGCAC 0.0446043	CCCTGCAC	0.0446043
GGAAGCCA 0.0446043	GGAAGCCA	0.0446043
CAGGACCA 0.0446043	CAGGACCA	0.0446043
CCTGGGCA 0.0446043	CCTGGGCA	0.0446043
CCCGAGAG 0.0441247	CCCGAGAG	0.0441247
AAAGAGAG 0.0441247	AAAGAGAG	0.0441247
CTGAGCAG 0.0441247	CTGAGCAG	0.0441247
CTGTGGGC 0.0441247	CTGTGGGC	0.0441247
GCGCGCCA 0.0441247	GCGCGCCA	0.0441247
GCTCTGGA 0.0441247	GCTCTGGA	0.0441247
CACGCCGG 0.0441247	CACGCCGG	0.0441247
GGGGACAC 0.0441247	GGGGACAC	0.0441247
CGAGGCTC 0.0441247	CGAGGCTC	0.0441247
AAGGCAGG 0.0441247	AAGGCAGG	0.0441247
CGCGTGGC 0.0441247	CGCGTGGC	0.0441247
CGCTCCAG 0.0441247	CGCTCCAG	0.0441247
CGGCCCAC 0.0441247	CGGCCCAC	0.0441247
CGGGCCGA 0.0441247	CGGGCCGA	0.0441247
CGGGGACA 0.0441247	CGGGGACA	0.0441247
CGGTCTCC 0.0441247	CGGTCTCC	0.0441247
CCTGACCC 0.0441247	CCTGACCC	0.0441247
AGAGAGGC 0.0441247	AGAGAGGC	0.0441247
CCACACCC 0.0441247	CCACACCC	0.0441247
CCACCTCG 0.0441247	CCACCTCG	0.0441247
CCAGACCC 0.0441247	CCAGACCC	0.0441247
AGCCAGAG 0.0441247	AGCCAGAG	0.0441247
AGCCGCCT 0.0441247	AGCCGCCT	0.0441247
CTCCCAGA 0.0441247	CTCCCAGA	0.0441247
CTCTGGGA 0.0441247	CTCTGGGA	0.0441247
[truncated: 30,897 more rows]

## Sheet: Gli3+Hand2 Overlap
Raw	BPs	Value
CCCCGCCC 0.270595	CCCCGCCC	0.270595
CCCGCCCC 0.268919	CCCGCCCC	0.268919
CCGCCGCC 0.25356	CCGCCGCC	0.25356
CCCTCCCC 0.246858	CCCTCCCC	0.246858
GCCGCCGC 0.239039	GCCGCCGC	0.239039
CCCCTCCC 0.236805	CCCCTCCC	0.236805
GCCCCGCC 0.214744	GCCCCGCC	0.214744
CCTCCCCC 0.210556	CCTCCCCC	0.210556
CGCCGCCG 0.204971	CGCCGCCG	0.204971
CCGCCCCC 0.203295	CCGCCCCC	0.203295
CCGCCCGC 0.191846	CCGCCCGC	0.191846
CCCGCCGC 0.186261	CCCGCCGC	0.186261
CGCCCGCC 0.181793	CGCCCGCC	0.181793
GCCCGCCC 0.180397	GCCCGCCC	0.180397
CGCCGCCC 0.173415	CGCCGCCC	0.173415
CCCCCTCC 0.173415	CCCCCTCC	0.173415
CCTCCTCC 0.170343	CCTCCTCC	0.170343
CCGCGGCC 0.170343	CCGCGGCC	0.170343
CGCCCCGC 0.166992	CGCCCCGC	0.166992
CCGCCTCC 0.165596	CCGCCTCC	0.165596
CCGCCCCG 0.164479	CCGCCCCG	0.164479
CCCCCGCC 0.163921	CCCCCGCC	0.163921
CCCGCCCG 0.163921	CCCGCCCG	0.163921
CCCGGCCC 0.160849	CCCGGCCC	0.160849
CCCGCGCC 0.159732	CCCGCGCC	0.159732
GCGGGGCC 0.158894	GCGGGGCC	0.158894
GCGCCGCC 0.157219	GCGCCGCC	0.157219
CGGCCGCC 0.15303	CGGCCGCC	0.15303
CCCACCCC 0.152471	CCCACCCC	0.152471
CCCCACCC 0.152471	CCCCACCC	0.152471
CGCGGCCC 0.151634	CGCGGCCC	0.151634
GCCCGGCC 0.149958	GCCCGGCC	0.149958
CCGCCGCG 0.149958	CCGCCGCG	0.149958
CTCCTCCC 0.148841	CTCCTCCC	0.148841
CGGCGGCC 0.148562	CGGCGGCC	0.148562
CCCGCGGC 0.146049	CCCGCGGC	0.146049
CCCCGCGC 0.144932	CCCCGCGC	0.144932
CCCGGGCC 0.144652	CCCGGGCC	0.144652
CGGGCGGC 0.144094	CGGGCGGC	0.144094
CCTCCGCC 0.143815	CCTCCGCC	0.143815
CCGCGGCG 0.142977	CCGCGGCG	0.142977
CCCAGCCC 0.14186	CCCAGCCC	0.14186
CTCCCGCC 0.140464	CTCCCGCC	0.140464
GCCGGGCC 0.139905	GCCGGGCC	0.139905
CCGCGCGC 0.138788	CCGCGCGC	0.138788
GCGCGGCC 0.13823	GCGCGGCC	0.13823
CCTCCCTC 0.137392	CCTCCCTC	0.137392
GGGAGGGA 0.136833	GGGAGGGA	0.136833
CCCCGGCC 0.136275	CCCCGGCC	0.136275
CCGCGCCC 0.136275	CCGCGCCC	0.136275							#DIV/0!
CTCCGCCC 0.135996	CTCCGCCC	0.135996
CGCGGGGC 0.135437	CGCGGGGC	0.135437
GCCCGCGC 0.134599	GCCCGCGC	0.134599
CCGCGCCG 0.133203	CCGCGCCG	0.133203
GCCGCCCC 0.132365	GCCGCCCC	0.132365
CTCCCTCC 0.132365	CTCCCTCC	0.132365
CGGGCCGC 0.132086	CGGGCCGC	0.132086
GCAGCCGC 0.132086	GCAGCCGC	0.132086
GGAGGGGA 0.131807	GGAGGGGA	0.131807
CGCGCCGC 0.131528	CGCGCCGC	0.131528
CCCCCACC 0.129852	CCCCCACC	0.129852
CCAGGCCC 0.129573	CCAGGCCC	0.129573
CCTCCCGC 0.129573	CCTCCCGC	0.129573
GCCCCCGC 0.129573	GCCCCCGC	0.129573
CCGGGCCG 0.129014	CCGGGCCG	0.129014
GCCCCTCC 0.129014	GCCCCTCC	0.129014
GCAGCGGC 0.128735	GCAGCGGC	0.128735
CGCGCGCC 0.127618	CGCGCGCC	0.127618
CCCCGCCG 0.127339	CCCCGCCG	0.127339
CCCAGGCC 0.127059	CCCAGGCC	0.127059
CCGCAGCC 0.126501	CCGCAGCC	0.126501
CCGCCCTC 0.126501	CCGCCCTC	0.126501
CCGGCCGC 0.125942	CCGGCCGC	0.125942
GCGGCGCC 0.125942	GCGGCGCC	0.125942
CTCCCCTC 0.125384	CTCCCCTC	0.125384
CGCCGCGC 0.124546	CGCCGCGC	0.124546
CCAGCCCC 0.124267	CCAGCCCC	0.124267
GCCGCGCC 0.123988	GCCGCGCC	0.123988
CCCCAGCC 0.123708	CCCCAGCC	0.123708
AGGGAGGG 0.123429	AGGGAGGG	0.123429
CCCTCCTC 0.12315	CCCTCCTC	0.12315
GGCCGCCC 0.12315	GGCCGCCC	0.12315
GCCCCGGC 0.122871	GCCCCGGC	0.122871
GGCGGGGA 0.122591	GGCGGGGA	0.122591
CCCGGGGC 0.122033	CCCGGGGC	0.122033
GCGGCCCC 0.121754	GCGGCCCC	0.121754
CGCGGCGC 0.121195	CGCGGCGC	0.121195
CGCCCCCG 0.121195	CGCCCCCG	0.121195
CCACCCCC 0.120637	CCACCCCC	0.120637
AGGGCGGG 0.120637	AGGGCGGG	0.120637
CGGCGGGC 0.120357	CGGCGGGC	0.120357
CCTCCCCG 0.120357	CCTCCCCG	0.120357
CCGGCCCG 0.120078	CCGGCCCG	0.120078
GCGCCCGC 0.11952	GCGCCCGC	0.11952
CCCGCCTC 0.11952	CCCGCCTC	0.11952
CCGGCGGC 0.118682	CCGGCGGC	0.118682
AGGGGCGG 0.118682	AGGGGCGG	0.118682
GAGGCGGC 0.118123	GAGGCGGC	0.118123
CGGCCCCG 0.117844	CGGCCCCG	0.117844
CGCCCCTC 0.117844	CGCCCCTC	0.117844
CCGGCCCC 0.116727	CCGGCCCC	0.116727
CCCGGCGC 0.116727	CCCGGCGC	0.116727
CGCGGCCG 0.116448	CGCGGCCG	0.116448
CCGCTGCC 0.116169	CCGCTGCC	0.116169
CCCGCGCG 0.115889	CCCGCGCG	0.115889
CGCGCCCC 0.11561	CGCGCCCC	0.11561
GCCCTCCC 0.115331	GCCCTCCC	0.115331
CGCGGGCC 0.115052	CGCGGGCC	0.115052
CCCCGGGC 0.115052	CCCCGGGC	0.115052
GCCAGGCC 0.115052	GCCAGGCC	0.115052
GCCCAGGC 0.115052	GCCCAGGC	0.115052
CTCCCCGC 0.114214	CTCCCCGC	0.114214
CGGCCCGC 0.113935	CGGCCCGC	0.113935
CGCCGCCA 0.113655	CGCCGCCA	0.113655
GCAGCAGC 0.113097	GCAGCAGC	0.113097
CCGGGGCC 0.113097	CCGGGGCC	0.113097
CGCCTCCC 0.112538	CGCCTCCC	0.112538
GCCTCCGC 0.112538	GCCTCCGC	0.112538
GCCCAGCC 0.112259	GCCCAGCC	0.112259
CCGCGGGC 0.112259	CCGCGGGC	0.112259
AGCGGCGG 0.11198	AGCGGCGG	0.11198
GGCCCGCC 0.111701	GGCCCGCC	0.111701
GGGCGGGA 0.111421	GGGCGGGA	0.111421
GCCTCCCC 0.111421	GCCTCCCC	0.111421
CCGCCCGG 0.111142	CCGCCCGG	0.111142
GAGGGGGC 0.111142	GAGGGGGC	0.111142
CGCGCGGC 0.110863	CGCGCGGC	0.110863
GCGCGCCC 0.110863	GCGCGCCC	0.110863
AGGGGAGG 0.110863	AGGGGAGG	0.110863
GCCGCAGC 0.110584	GCCGCAGC	0.110584
CGCGCCCG 0.110304	CGCGCCCG	0.110304
CGCCCTCC 0.110025	CGCCCTCC	0.110025
AGGCGGCG 0.109746	AGGCGGCG	0.109746
CCGGGCCC 0.109187	CCGGGCCC	0.109187
GCTCCGCC 0.109187	GCTCCGCC	0.109187
CAGCCGCC 0.109187	CAGCCGCC	0.109187
CCGGGGCG 0.108908	CCGGGGCG	0.108908
CTGCCGCC 0.10835	CTGCCGCC	0.10835
CCCGGCCG 0.10835	CCCGGCCG	0.10835
CCCCGCGG 0.107791	CCCCGCGG	0.107791
CCGGCTCC 0.107233	CCGGCTCC	0.107233
GCCGCGGC 0.107233	GCCGCGGC	0.107233
CGCCCGCG 0.106953	CGCCCGCG	0.106953
GCGGGAGC 0.106953	GCGGGAGC	0.106953
CGGCGCCC 0.106674	CGGCGCCC	0.106674
GAGGAGGA 0.106674	GAGGAGGA	0.106674
CCCGCAGC 0.106395	CCCGCAGC	0.106395
CGCCGGGC 0.106116	CGCCGGGC	0.106116
GGCGGCCC 0.106116	GGCGGCCC	0.106116
CCCTTCCC 0.105836	CCCTTCCC	0.105836
CCCTCCCG 0.105557	CCCTCCCG	0.105557
CCCGGAGC 0.10444	CCCGGAGC	0.10444
CGGGGCGC 0.104161	CGGGGCGC	0.104161
CGCCCGGC 0.103602	CGCCCGGC	0.103602
GCGGCAGC 0.103602	GCGGCAGC	0.103602
CCCTCCGC 0.103323	CCCTCCGC	0.103323
CGCCCCCC 0.103044	CGCCCCCC	0.103044
AGGAGGAG 0.103044	AGGAGGAG	0.103044
GAGGAGGC 0.103044	GAGGAGGC	0.103044
CGGCCTCC 0.102765	CGGCCTCC	0.102765
GGGGAGGA 0.102765	GGGGAGGA	0.102765
CCCGCTCC 0.102765	CCCGCTCC	0.102765
GCTCCTCC 0.102206	GCTCCTCC	0.102206
CCTGGGCC 0.102206	CCTGGGCC	0.102206
AGGGGGCG 0.101927	AGGGGGCG	0.101927
CCGGCGCG 0.10081	CCGGCGCG	0.10081
GCGGAGCC 0.10081	GCGGAGCC	0.10081
GCCCACCC 0.10081	GCCCACCC	0.10081
GGCCTCCC 0.100531	GGCCTCCC	0.100531
CTCCCCCA 0.100531	CTCCCCCA	0.100531
CCGGAGCC 0.100251	CCGGAGCC	0.100251
GCTGGGCC 0.100251	GCTGGGCC	0.100251
CGCCGGCC 0.0999721	CGCCGGCC	0.0999721
AGGGGGAG 0.0999721	AGGGGGAG	0.0999721
GCGGCCGC 0.0996928	GCGGCCGC	0.0996928
CCCGGGAG 0.0996928	CCCGGGAG	0.0996928
CCAGGCCG 0.0991343	CCAGGCCG	0.0991343
CCCTGCCC 0.0991343	CCCTGCCC	0.0991343
CGCGCTCC 0.0988551	CGCGCTCC	0.0988551
CCCGGGCG 0.0988551	CCCGGGCG	0.0988551
CCGGGCGC 0.0982966	CCGGGCGC	0.0982966
AGGCCGCG 0.0977381	AGGCCGCG	0.0977381
CCGCCGGC 0.0977381	CCGCCGGC	0.0977381
AGCCCCGC 0.0974588	AGCCCCGC	0.0974588
CCCGGCGG 0.0974588	CCCGGCGG	0.0974588
CCTTCCCC 0.0974588	CCTTCCCC	0.0974588
CCAGCGCC 0.0969003	CCAGCGCC	0.0969003
CCCGGCTC 0.0969003	CCCGGCTC	0.0969003
CCTCGGCC 0.0966211	CCTCGGCC	0.0966211
CCGCCAGC 0.0966211	CCGCCAGC	0.0966211
CAGCCCCG 0.0966211	CAGCCCCG	0.0966211
CAGGCCCG 0.0963418	CAGGCCCG	0.0963418
CCGGCCTC 0.0960626	CCGGCCTC	0.0960626
CCGGGAGG 0.0957833	CCGGGAGG	0.0957833
CCGCCACC 0.0957833	CCGCCACC	0.0957833
CCAGCTCC 0.095504	CCAGCTCC	0.095504
GCGCCCCC 0.0952248	GCGCCCCC	0.0952248
AGGAGGGG 0.0949455	AGGAGGGG	0.0949455
CCGGCGCC 0.0946663	CCGGCGCC	0.0946663
CTTCCTCC 0.0946663	CTTCCTCC	0.0946663
CCGGGAGC 0.094387	CCGGGAGC	0.094387
CCGCTCCC 0.094387	CCGCTCCC	0.094387
GCCGGCGC 0.0941078	GCCGGCGC	0.0941078
GCGGCTCC 0.0938285	GCGGCTCC	0.0938285
GCCTGCGC 0.0938285	GCCTGCGC	0.0938285
GAGGCCGC 0.0935493	GAGGCCGC	0.0935493
GGGGCGGA 0.09327	GGGGCGGA	0.09327
GCCTGGCC 0.09327	GCCTGGCC	0.09327
CAGCGGCG 0.09327	CAGCGGCG	0.09327
GCCACCGC 0.0929908	GCCACCGC	0.0929908
AGGCCCGG 0.0927115	AGGCCCGG	0.0927115
CAGCCCGG 0.0927115	CAGCCCGG	0.0927115
CAGGCCGC 0.0927115	CAGGCCGC	0.0927115
CCACCGCC 0.0924323	CCACCGCC	0.0924323
CCGCGCTC 0.0924323	CCGCGCTC	0.0924323
CTCCCCCC 0.0924323	CTCCCCCC	0.0924323
CGGGCTCC 0.092153	CGGGCTCC	0.092153
CGGCGCGC 0.0918738	CGGCGCGC	0.0918738
CTGCAGCC 0.0918738	CTGCAGCC	0.0918738
CCACCCAC 0.0918738	CCACCCAC	0.0918738
GCCCGGGA 0.0918738	GCCCGGGA	0.0918738
CCGAGGCC 0.0918738	CCGAGGCC	0.0918738
AGCCGCCG 0.0913153	AGCCGCCG	0.0913153
AGGCGGGG 0.0907568	AGGCGGGG	0.0907568
CCCGCCCA 0.0907568	CCCGCCCA	0.0907568
CGCAGCCC 0.0901983	CGCAGCCC	0.0901983
CCACCCAG 0.0901983	CCACCCAG	0.0901983
CTGCCTCC 0.089919	CTGCCTCC	0.089919
CAGCCTCC 0.089919	CAGCCTCC	0.089919
GCCGAGGC 0.0896398	GCCGAGGC	0.0896398
GCCGGCCC 0.0896398	GCCGGCCC	0.0896398
GAGGGGGA 0.0896398	GAGGGGGA	0.0896398
CGGCGGAG 0.0893605	CGGCGGAG	0.0893605
CCCCTTCC 0.0893605	CCCCTTCC	0.0893605
AGCCTGGG 0.0893605	AGCCTGGG	0.0893605
CCCCGGCG 0.0890813	CCCCGGCG	0.0890813
CGGAGCCC 0.088802	CGGAGCCC	0.088802
CCCCCCAC 0.088802	CCCCCCAC	0.088802
GCGGGCCC 0.088802	GCGGGCCC	0.088802
CCCCCAGC 0.0885228	CCCCCAGC	0.0885228
CCTCTCCC 0.0882435	CCTCTCCC	0.0882435
AGGCCCCG 0.0882435	AGGCCCCG	0.0882435
GCCGGAGC 0.0882435	GCCGGAGC	0.0882435
GCGCAGCC 0.0882435	GCGCAGCC	0.0882435
CGGGAGGC 0.0879643	CGGGAGGC	0.0879643
CGGGGCCC 0.0879643	CGGGGCCC	0.0879643
CCGCCCAG 0.0879643	CCGCCCAG	0.0879643
CTCCAGCC 0.0879643	CTCCAGCC	0.0879643
CAGCCCCC 0.087685	CAGCCCCC	0.087685
CTCCCGGC 0.087685	CTCCCGGC	0.087685
CGCAGCCG 0.0874058	CGCAGCCG	0.0874058
AGGCCGGG 0.0874058	AGGCCGGG	0.0874058
GCCCCAGC 0.0874058	GCCCCAGC	0.0874058
CCTCCGCG 0.0871265	CCTCCGCG	0.0871265
CTCCGGCC 0.0868472	CTCCGGCC	0.0868472
CCAGGGCC 0.0862887	CCAGGGCC	0.0862887
CGGAGCCG 0.0860095	CGGAGCCG	0.0860095
CCCCCCGC 0.0860095	CCCCCCGC	0.0860095
CTCCGGGC 0.0860095	CTCCGGGC	0.0860095
CGGGAGCC 0.0857302	CGGGAGCC	0.0857302
CTGCTGCC 0.0857302	CTGCTGCC	0.0857302
GCCGGGGA 0.0857302	GCCGGGGA	0.0857302
CAGGCCCC 0.0857302	CAGGCCCC	0.0857302
CGGCCGGC 0.085451	CGGCCGGC	0.085451
CGGCTCCC 0.085451	CGGCTCCC	0.085451
CGGGGCTC 0.085451	CGGGGCTC	0.085451
CCCAGGGC 0.085451	CCCAGGGC	0.085451
CTGCGGCC 0.0851717	CTGCGGCC	0.0851717
GCGGCGGA 0.0851717	GCGGCGGA	0.0851717
CGCCTCCG 0.0848925	CGCCTCCG	0.0848925
CCCAGCTC 0.0848925	CCCAGCTC	0.0848925
CCCCAGGC 0.0848925	CCCCAGGC	0.0848925
CCTGCCCC 0.0848925	CCTGCCCC	0.0848925
CCAGGCTC 0.0846132	CCAGGCTC	0.0846132
CCCGAGCC 0.0846132	CCCGAGCC	0.0846132
AGCCCGGC 0.0846132	AGCCCGGC	0.0846132
CGGGCGCC 0.084334	CGGGCGCC	0.084334
GCAGCCCC 0.084334	GCAGCCCC	0.084334
GCCGCCAC 0.084334	GCCGCCAC	0.084334
CTCCGCGC 0.084334	CTCCGCGC	0.084334
CCGGGGAG 0.0840547	CCGGGGAG	0.0840547
CCTGCAGC 0.0840547	CCTGCAGC	0.0840547
GCAGGCCC 0.0837755	GCAGGCCC	0.0837755
AGGAGGCG 0.0837755	AGGAGGCG	0.0837755
CCTCCCAG 0.0834962	CCTCCCAG	0.0834962
CCCTCTCC 0.0834962	CCCTCTCC	0.0834962
CAGGGAGG 0.0834962	CAGGGAGG	0.0834962
GCAGCGCC 0.083217	GCAGCGCC	0.083217
GCAGCTCC 0.083217	GCAGCTCC	0.083217
GCCAGCCC 0.083217	GCCAGCCC	0.083217
CCGCGGAG 0.083217	CCGCGGAG	0.083217
CGGAGGAG 0.0826585	CGGAGGAG	0.0826585
CCCCCGGC 0.0826585	CCCCCGGC	0.0826585
CCGGGCTC 0.0826585	CCGGGCTC	0.0826585
AGGCCTGG 0.0823792	AGGCCTGG	0.0823792
CCCGCCGG 0.0823792	CCCGCCGG	0.0823792
CGGCCCAG 0.0821	CGGCCCAG	0.0821
CGGGCCCC 0.0821	CGGGCCCC	0.0821
CGCCGCTC 0.0821	CGCCGCTC	0.0821
AGCAGCAG 0.0821	AGCAGCAG	0.0821
GCGCCTCC 0.0821	GCGCCTCC	0.0821
GGCGCCCC 0.0821	GGCGCCCC	0.0821
CAGCGGCC 0.0821	CAGCGGCC	0.0821
CCCTGGCC 0.0818207	CCCTGGCC	0.0818207
CAGCAGCA 0.0818207	CAGCAGCA	0.0818207
CAGCAGCC 0.0818207	CAGCAGCC	0.0818207
CTCTCTCC 0.0818207	CTCTCTCC	0.0818207
CGCTGCCG 0.0815415	CGCTGCCG	0.0815415
CCCGGAGG 0.0815415	CCCGGAGG	0.0815415
GCAGGCGC 0.0812622	GCAGGCGC	0.0812622
CCCCCGCG 0.0812622	CCCCCGCG	0.0812622
AGCCGCGG 0.0812622	AGCCGCGG	0.0812622
CCGCCTGC 0.0812622	CCGCCTGC	0.0812622
GAGCGCGC 0.0812622	GAGCGCGC	0.0812622
CGGGGGAG 0.080983	CGGGGGAG	0.080983
GACCACCC 0.080983	GACCACCC	0.080983
CCCCCCTC 0.080983	CCCCCCTC	0.080983
CCAGCAGC 0.080983	CCAGCAGC	0.080983
CCTGGCCC 0.080983	CCTGGCCC	0.080983
CCTCCCCA 0.0807037	CCTCCCCA	0.0807037
CCAGCCCG 0.0804245	CCAGCCCG	0.0804245
CGCTGCCC 0.0801452	CGCTGCCC	0.0801452
CGCAGGCC 0.0801452	CGCAGGCC	0.0801452
CGCGGGAG 0.079866	CGCGGGAG	0.079866
CGCTCCCC 0.079866	CGCTCCCC	0.079866
CGCTCCGC 0.079866	CGCTCCGC	0.079866
CGGCCCCC 0.079866	CGGCCCCC	0.079866
CGCCGCAG 0.079866	CGCCGCAG	0.079866
CCAGCCGC 0.079866	CCAGCCGC	0.079866
GCTGCCCC 0.079866	GCTGCCCC	0.079866
GCCTGGGA 0.079866	GCCTGGGA	0.079866
CCGAGCCC 0.079866	CCGAGCCC	0.079866
CGGGCTGC 0.0795867	CGGGCTGC	0.0795867
CCCAGCCG 0.0795867	CCCAGCCG	0.0795867
GCCCTGCC 0.0795867	GCCCTGCC	0.0795867
GCGAGGCC 0.0795867	GCGAGGCC	0.0795867
CGCCAGCC 0.0793075	CGCCAGCC	0.0793075
GCGGGGGA 0.0793075	GCGGGGGA	0.0793075
GCTCGCCC 0.0793075	GCTCGCCC	0.0793075
AGCCCCGG 0.0790282	AGCCCCGG	0.0790282
CCCGCTGC 0.0790282	CCCGCTGC	0.0790282
GGCCGGGA 0.0790282	GGCCGGGA	0.0790282
GGCGGCCA 0.0790282	GGCGGCCA	0.0790282
CTGGCGGC 0.078749	CTGGCGGC	0.078749
CTCCAGGC 0.078749	CTCCAGGC	0.078749
CGGAGGCC 0.0784697	CGGAGGCC	0.0784697
GGGAGCCC 0.0784697	GGGAGCCC	0.0784697
CCAGGCGG 0.0784697	CCAGGCGG	0.0784697
CCCCTGCC 0.0784697	CCCCTGCC	0.0784697
AGCCCGGG 0.0784697	AGCCCGGG	0.0784697
AGCGCCGC 0.0784697	AGCGCCGC	0.0784697
GGCCGCCA 0.0784697	GGCCGCCA	0.0784697
GCCAGCGC 0.0781904	GCCAGCGC	0.0781904
GGCGGCGA 0.0781904	GGCGGCGA	0.0781904
CGCGGAGC 0.0779112	CGCGGAGC	0.0779112
CTGCGGGC 0.0779112	CTGCGGGC	0.0779112
GCTCGGCC 0.0779112	GCTCGGCC	0.0779112
CTGGGCCC 0.0776319	CTGGGCCC	0.0776319
CCCACCCA 0.0776319	CCCACCCA	0.0776319
CAGCGCCC 0.0776319	CAGCGCCC	0.0776319
CGCCCCCA 0.0773527	CGCCCCCA	0.0773527
GGGAGAGA 0.0773527	GGGAGAGA	0.0773527
CCGGAGGC 0.0773527	CCGGAGGC	0.0773527
AGGCGGCC 0.0773527	AGGCGGCC	0.0773527
CCAGAGCC 0.0773527	CCAGAGCC	0.0773527
GCTGCTCC 0.0773527	GCTGCTCC	0.0773527
GCCTCGCC 0.0773527	GCCTCGCC	0.0773527
CCCTCCCA 0.0773527	CCCTCCCA	0.0773527
CTGGGGCC 0.0770734	CTGGGGCC	0.0770734
AGCCCGCC 0.0770734	AGCCCGCC	0.0770734
AGCGCGGC 0.0770734	AGCGCGGC	0.0770734
CCGCTCCG 0.0770734	CCGCTCCG	0.0770734
CAGCCCGC 0.0770734	CAGCCCGC	0.0770734
CCTGGAGC 0.0770734	CCTGGAGC	0.0770734
CGGAGCGC 0.0767942	CGGAGCGC	0.0767942
CCCAGCAG 0.0767942	CCCAGCAG	0.0767942
AGGCCGCC 0.0767942	AGGCCGCC	0.0767942
CAGCTCCC 0.0767942	CAGCTCCC	0.0767942
CGGCGGCA 0.0765149	CGGCGGCA	0.0765149
CCTCCCAC 0.0765149	CCTCCCAC	0.0765149
CCTCGCCC 0.0765149	CCTCGCCC	0.0765149
AGCCAGGC 0.0765149	AGCCAGGC	0.0765149
CCGCTCGC 0.0765149	CCGCTCGC	0.0765149
CGGGGAGC 0.0762357	CGGGGAGC	0.0762357
GTGGGGGA 0.0762357	GTGGGGGA	0.0762357
GCGCGCGC 0.0762357	GCGCGCGC	0.0762357
GCCAGGGC 0.0762357	GCCAGGGC	0.0762357
CAGGCCGG 0.0762357	CAGGCCGG	0.0762357
CAGGCGGC 0.0762357	CAGGCGGC	0.0762357
CCTGCGCC 0.0762357	CCTGCGCC	0.0762357
CGCAGCGC 0.0759564	CGCAGCGC	0.0759564
AGAGGGAG 0.0759564	AGAGGGAG	0.0759564
CCGGGGGC 0.0759564	CCGGGGGC	0.0759564
GGAGGCCC 0.0759564	GGAGGCCC	0.0759564
CTCTCCCC 0.0759564	CTCTCCCC	0.0759564
CTGGGCTC 0.0756772	CTGGGCTC	0.0756772
CCCGCCAG 0.0756772	CCCGCCAG	0.0756772
CCGCCCAC 0.0756772	CCGCCCAC	0.0756772
CCTGCTGC 0.0756772	CCTGCTGC	0.0756772
CGCCAGGC 0.0753979	CGCCAGGC	0.0753979
CAGGGCGG 0.0753979	CAGGGCGG	0.0753979
AGGGAGGA 0.0753979	AGGGAGGA	0.0753979
CGGGGGGC 0.0751187	CGGGGGGC	0.0751187
AGCCGGGC 0.0751187	AGCCGGGC	0.0751187
GCCGCTCC 0.0751187	GCCGCTCC	0.0751187
CTCCCAGC 0.0751187	CTCCCAGC	0.0751187
GCAGAGGC 0.0748394	GCAGAGGC	0.0748394
CTGCCCGC 0.0748394	CTGCCCGC	0.0748394
CCGGCTGC 0.0748394	CCGGCTGC	0.0748394
GCGGGGAC 0.0748394	GCGGGGAC	0.0748394
GCCGAGCC 0.0745602	GCCGAGCC	0.0745602
GGCCTGGA 0.0745602	GGCCTGGA	0.0745602
GAGGCTGC 0.0745602	GAGGCTGC	0.0745602
CCTCAGCC 0.0742809	CCTCAGCC	0.0742809
GCGCGGGA 0.0742809	GCGCGGGA	0.0742809
CCTGGGAG 0.0742809	CCTGGGAG	0.0742809
CGCTCCCG 0.0740017	CGCTCCCG	0.0740017
CCAGCCTC 0.0740017	CCAGCCTC	0.0740017
GAGCCGCC 0.0740017	GAGCCGCC	0.0740017
CTCGGCCC 0.0740017	CTCGGCCC	0.0740017
AGGGAGGC 0.0740017	AGGGAGGC	0.0740017
CCTGGGGC 0.0740017	CCTGGGGC	0.0740017
CGGCTGCC 0.0737224	CGGCTGCC	0.0737224
CGCCCAGC 0.0737224	CGCCCAGC	0.0737224
CTGCGCGC 0.0737224	CTGCGCGC	0.0737224
GCGCTCCC 0.0737224	GCGCTCCC	0.0737224
CCCTGCGC 0.0737224	CCCTGCGC	0.0737224
CAGGCCTC 0.0737224	CAGGCCTC	0.0737224
CGGCGGGA 0.0734432	CGGCGGGA	0.0734432
GCCCGAGC 0.0734432	GCCCGAGC	0.0734432
CCCCTCCG 0.0731639	CCCCTCCG	0.0731639
CCACCCGC 0.0731639	CCACCCGC	0.0731639
CAGAGCCC 0.0731639	CAGAGCCC	0.0731639
CAGGCTCC 0.0731639	CAGGCTCC	0.0731639
ATGGCGGC 0.0731639	ATGGCGGC	0.0731639
GGCTGGGA 0.0728847	GGCTGGGA	0.0728847
CCACCTCC 0.0728847	CCACCTCC	0.0728847
GGCGGGCA 0.0728847	GGCGGGCA	0.0728847
CTCCCTGC 0.0728847	CTCCCTGC	0.0728847
CTCGCCGC 0.0728847	CTCGCCGC	0.0728847
CGGCCTGC 0.0726054	CGGCCTGC	0.0726054
CGGGCCTC 0.0726054	CGGGCCTC	0.0726054
CGCCCTGC 0.0726054	CGCCCTGC	0.0726054
CCCGAGGC 0.0726054	CCCGAGGC	0.0726054
CCTCCTGC 0.0726054	CCTCCTGC	0.0726054
AGGCCCAG 0.0726054	AGGCCCAG	0.0726054
GCCCGGGC 0.0726054	GCCCGGGC	0.0726054
CCCTGGGC 0.0726054	CCCTGGGC	0.0726054
GGAGGAGA 0.0726054	GGAGGAGA	0.0726054
CTCGGGGC 0.0726054	CTCGGGGC	0.0726054
AGGGAGAG 0.0726054	AGGGAGAG	0.0726054
GCAGGGCC 0.0723262	GCAGGGCC	0.0723262
AGAGGAGG 0.0723262	AGAGGAGG	0.0723262
AGCTGCAG 0.0723262	AGCTGCAG	0.0723262
CGCTCGCC 0.0720469	CGCTCGCC	0.0720469
CCCCCGGG 0.0720469	CCCCCGGG	0.0720469
AGCTGCTG 0.0720469	AGCTGCTG	0.0720469
CTCCTTCC 0.0720469	CTCCTTCC	0.0720469
CGCGCTGC 0.0717677	CGCGCTGC	0.0717677
CGGGGGCC 0.0717677	CGGGGGCC	0.0717677
CGCCACCG 0.0717677	CGCCACCG	0.0717677
CCGGAGCG 0.0717677	CCGGAGCG	0.0717677
AGCGCGGG 0.0717677	AGCGCGGG	0.0717677
CCAGCCAG 0.0717677	CCAGCCAG	0.0717677
CAGCCTGG 0.0717677	CAGCCTGG	0.0717677
CCTGCGCG 0.0717677	CCTGCGCG	0.0717677
CGAGGCCG 0.0714884	CGAGGCCG	0.0714884
CGCCCACC 0.0714884	CGCCCACC	0.0714884
AAAAAAAA 0.0714884	AAAAAAAA	0.0714884
CCCCGCTC 0.0714884	CCCCGCTC	0.0714884
GCGGAGGA 0.0714884	GCGGAGGA	0.0714884
GCCTGCCC 0.0714884	GCCTGCCC	0.0714884
GAGCCCGC 0.0714884	GAGCCCGC	0.0714884
CCAGCTGC 0.0712092	CCAGCTGC	0.0712092
AGCCCAGC 0.0712092	AGCCCAGC	0.0712092
CACCCCCA 0.0712092	CACCCCCA	0.0712092
AGGCTGGG 0.0712092	AGGCTGGG	0.0712092
CGGGCGAG 0.0709299	CGGGCGAG	0.0709299
CCCAGCGC 0.0709299	CCCAGCGC	0.0709299
CCTCTGCC 0.0709299	CCTCTGCC	0.0709299
AGCAGCTG 0.0709299	AGCAGCTG	0.0709299
AGGCGGGC 0.0709299	AGGCGGGC	0.0709299
CAGGCGGG 0.0709299	CAGGCGGG	0.0709299
CGCGGGGA 0.0706507	CGCGGGGA	0.0706507
CGGCCGAG 0.0706507	CGGCCGAG	0.0706507
CCGCAGCG 0.0706507	CCGCAGCG	0.0706507
GGAGCCCC 0.0706507	GGAGCCCC	0.0706507
GAGCGAGC 0.0706507	GAGCGAGC	0.0706507
CGCGGCTC 0.0703714	CGCGGCTC	0.0703714
CTGCGCCC 0.0703714	CTGCGCCC	0.0703714
CACACACA 0.0703714	CACACACA	0.0703714
GCCCGCCA 0.0703714	GCCCGCCA	0.0703714
GGCCACCC 0.0703714	GGCCACCC	0.0703714
CAGCCAGC 0.0703714	CAGCCAGC	0.0703714
GGGAAGGA 0.0700922	GGGAAGGA	0.0700922
CTGCTCCC 0.0700922	CTGCTCCC	0.0700922
AGGCGGAG 0.0700922	AGGCGGAG	0.0700922
CAGAGGCC 0.0700922	CAGAGGCC	0.0700922
CCGCCCCA 0.0698129	CCGCCCCA	0.0698129
CTCAGCCC 0.0698129	CTCAGCCC	0.0698129
CTGCCCCC 0.0695336	CTGCCCCC	0.0695336
CTGGGGGC 0.0695336	CTGGGGGC	0.0695336
AGCCGGGG 0.0695336	AGCCGGGG	0.0695336
CCTGCTCC 0.0695336	CCTGCTCC	0.0695336
CGCTGCGC 0.0692544	CGCTGCGC	0.0692544
CGGCCACC 0.0692544	CGGCCACC	0.0692544
CGCCTGGC 0.0692544	CGCCTGGC	0.0692544
CGCGCAGC 0.0692544	CGCGCAGC	0.0692544
CTGGCCGC 0.0692544	CTGGCCGC	0.0692544
CCCCGGAG 0.0692544	CCCCGGAG	0.0692544
ACCCCGCC 0.0692544	ACCCCGCC	0.0692544
GCTCCAGC 0.0692544	GCTCCAGC	0.0692544
GCCCCACC 0.0692544	GCCCCACC	0.0692544
GCCGCGGA 0.0692544	GCCGCGGA	0.0692544
GGCCCGGA 0.0692544	GGCCCGGA	0.0692544
CCGGGCAG 0.0689751	CCGGGCAG	0.0689751
GCGCTGCC 0.0689751	GCGCTGCC	0.0689751
CCGCCTCG 0.0689751	CCGCCTCG	0.0689751
GGAGGGAA 0.0689751	GGAGGGAA	0.0689751
CAGCAGGC 0.0689751	CAGCAGGC	0.0689751
GGCTGCCC 0.0686959	GGCTGCCC	0.0686959
CCTCCAGC 0.0686959	CCTCCAGC	0.0686959
CCTCGGCG 0.0686959	CCTCGGCG	0.0686959
AGCCCAGG 0.0686959	AGCCCAGG	0.0686959
GCCTCTCC 0.0686959	GCCTCTCC	0.0686959
CAGCCAGG 0.0686959	CAGCCAGG	0.0686959
CAGCCGCG 0.0686959	CAGCCGCG	0.0686959
CAGCGCCG 0.0686959	CAGCGCCG	0.0686959
CTGGAGCC 0.0684166	CTGGAGCC	0.0684166
CCAGGCAG 0.0684166	CCAGGCAG	0.0684166
CCTCCGGC 0.0684166	CCTCCGGC	0.0684166
AGGCCCGC 0.0684166	AGGCCCGC	0.0684166
AGGGCGGC 0.0684166	AGGGCGGC	0.0684166
GGGAGGAA 0.0681374	GGGAGGAA	0.0681374
CCCCGCAG 0.0681374	CCCCGCAG	0.0681374
CGGGAGGA 0.0678581	CGGGAGGA	0.0678581
CGGGCAGC 0.0678581	CGGGCAGC	0.0678581
CGAGGCCC 0.0678581	CGAGGCCC	0.0678581
GGCTCCCC 0.0678581	GGCTCCCC	0.0678581
CTTCCCTC 0.0678581	CTTCCCTC	0.0678581
CCGCAGGC 0.0678581	CCGCAGGC	0.0678581
CAGCCCTG 0.0678581	CAGCCCTG	0.0678581
CCTGGGCG 0.0678581	CCTGGGCG	0.0678581
CCAGGCGC 0.0675789	CCAGGCGC	0.0675789
CCCCTCTC 0.0675789	CCCCTCTC	0.0675789
CTCCCACC 0.0675789	CTCCCACC	0.0675789
CGCAGGCG 0.0672996	CGCAGGCG	0.0672996
GGGTGGGA 0.0672996	GGGTGGGA	0.0672996
CCTCCAGG 0.0672996	CCTCCAGG	0.0672996
CCTCCTTC 0.0672996	CCTCCTTC	0.0672996
ACCACCCA 0.0672996	ACCACCCA	0.0672996
AGGAAGGG 0.0672996	AGGAAGGG	0.0672996
GCTGCGCC 0.0672996	GCTGCGCC	0.0672996
CCTGCCTC 0.0672996	CCTGCCTC	0.0672996
GGTGGGGA 0.0670204	GGTGGGGA	0.0670204
CTGGCTGC 0.0670204	CTGGCTGC	0.0670204
CCGAGCGC 0.0670204	CCGAGCGC	0.0670204
CAGCCCAG 0.0670204	CAGCCCAG	0.0670204
CCTGCCGC 0.0670204	CCTGCCGC	0.0670204
AGGCGCGG 0.0667411	AGGCGCGG	0.0667411
CCCACCCG 0.0664619	CCCACCCG	0.0664619
AGCGGCCG 0.0664619	AGCGGCCG	0.0664619
CCCTCGGC 0.0664619	CCCTCGGC	0.0664619
GAGGCCCC 0.0664619	GAGGCCCC	0.0664619
CTCCTGCC 0.0664619	CTCCTGCC	0.0664619
CTCGGCGC 0.0664619	CTCGGCGC	0.0664619
AGGGAAGG 0.0664619	AGGGAAGG	0.0664619
CCTGCGGC 0.0664619	CCTGCGGC	0.0664619
CCTTCCTC 0.0664619	CCTTCCTC	0.0664619
CGGAGGGC 0.0661826	CGGAGGGC	0.0661826
ACCGCCGC 0.0661826	ACCGCCGC	0.0661826
AGGAGCTG 0.0661826	AGGAGCTG	0.0661826
CTCGGGCC 0.0661826	CTCGGGCC	0.0661826
CCTTCTCC 0.0661826	CCTTCTCC	0.0661826
CGCGCGCG 0.0659034	CGCGCGCG	0.0659034
CTGGGCGC 0.0659034	CTGGGCGC	0.0659034
CCTCTCTC 0.0659034	CCTCTCTC	0.0659034
CCCTCGCC 0.0659034	CCCTCGCC	0.0659034
GAGGCAGC 0.0659034	GAGGCAGC	0.0659034
CGCGCCTC 0.0656241	CGCGCCTC	0.0656241
CCTCTTCC 0.0656241	CCTCTTCC	0.0656241
AGGAGGGA 0.0656241	AGGAGGGA	0.0656241
CCGCCAGG 0.0656241	CCGCCAGG	0.0656241
CCGCCGAG 0.0656241	CCGCCGAG	0.0656241
CCGCCGCA 0.0656241	CCGCCGCA	0.0656241
GAGCGGGC 0.0656241	GAGCGGGC	0.0656241
CTGCAGGC 0.0653449	CTGCAGGC	0.0653449
CCCAGGCG 0.0653449	CCCAGGCG	0.0653449
CCCCGGGA 0.0653449	CCCCGGGA	0.0653449
AGCAGCCG 0.0653449	AGCAGCCG	0.0653449
AGGCCAGG 0.0653449	AGGCCAGG	0.0653449
GCCACCCA 0.0653449	GCCACCCA	0.0653449
CCCGGGAC 0.0653449	CCCGGGAC	0.0653449
CAGCGCGG 0.0653449	CAGCGCGG	0.0653449
CAGCTCCA 0.0653449	CAGCTCCA	0.0653449
CAGGGTGG 0.0653449	CAGGGTGG	0.0653449
AGGGTGGG 0.0653449	AGGGTGGG	0.0653449
CCTGCCCG 0.0653449	CCTGCCCG	0.0653449
CCTGGCCG 0.0653449	CCTGGCCG	0.0653449
CCACCCCG 0.0650656	CCACCCCG	0.0650656
CCGCCATC 0.0650656	CCGCCATC	0.0650656
CCGCTGCG 0.0650656	CCGCTGCG	0.0650656
GGAGAGGA 0.0650656	GGAGAGGA	0.0650656
CAGGGCCC 0.0650656	CAGGGCCC	0.0650656
GAGGGAGA 0.0650656	GAGGGAGA	0.0650656
GAGGGAGC 0.0650656	GAGGGAGC	0.0650656
AGGGCTGG 0.0650656	AGGGCTGG	0.0650656
CGCCTCGC 0.0647864	CGCCTCGC	0.0647864
AGAGAGAG 0.0647864	AGAGAGAG	0.0647864
CCCCTCGC 0.0647864	CCCCTCGC	0.0647864
CACGCCCC 0.0647864	CACGCCCC	0.0647864
AGGCCGAG 0.0647864	AGGCCGAG	0.0647864
GCTGGGGA 0.0647864	GCTGGGGA	0.0647864
CAGGGCCG 0.0647864	CAGGGCCG	0.0647864
CCCAGAGC 0.0645071	CCCAGAGC	0.0645071
AGGAGAGG 0.0645071	AGGAGAGG	0.0645071
GAGGGCGC 0.0645071	GAGGGCGC	0.0645071
CTCTCCTC 0.0645071	CTCTCCTC	0.0645071
CCTGGCGC 0.0645071	CCTGGCGC	0.0645071
GCAGAGCC 0.0642279	GCAGAGCC	0.0642279
CGCCGAGC 0.0642279	CGCCGAGC	0.0642279
CCTCCACC 0.0642279	CCTCCACC	0.0642279
GCGGGCGA 0.0642279	GCGGGCGA	0.0642279
GCTCTCCC 0.0642279	GCTCTCCC	0.0642279
CAGGCTGG 0.0642279	CAGGCTGG	0.0642279
GAGGAGCC 0.0642279	GAGGAGCC	0.0642279
AGCAGCGG 0.0639486	AGCAGCGG	0.0639486
AGGCCGGC 0.0639486	AGGCCGGC	0.0639486
CCGAGCCG 0.0639486	CCGAGCCG	0.0639486
CAGGCAGC 0.0639486	CAGGCAGC	0.0639486
CCTGGCTC 0.0639486	CCTGGCTC	0.0639486
CGGGGCAG 0.0636694	CGGGGCAG	0.0636694
CCAGGGAG 0.0636694	CCAGGGAG	0.0636694
AGCCAGCC 0.0636694	AGCCAGCC	0.0636694
CCCGGGGA 0.0636694	CCCGGGGA	0.0636694
GAGCGGCC 0.0636694	GAGCGGCC	0.0636694
GCAGGGGC 0.0633901	GCAGGGGC	0.0633901
AGCCTCCC 0.0633901	AGCCTCCC	0.0633901
GCCCCCAC 0.0633901	GCCCCCAC	0.0633901
GAGAGGGA 0.0633901	GAGAGGGA	0.0633901
CGCCCCAG 0.0631109	CGCCCCAG	0.0631109
GCGGCCAC 0.0631109	GCGGCCAC	0.0631109
CCGCTTCC 0.0631109	CCGCTTCC	0.0631109
CAGGCCAG 0.0631109	CAGGCCAG	0.0631109
GAGCCGGC 0.0631109	GAGCCGGC	0.0631109
GAGGGGCC 0.0631109	GAGGGGCC	0.0631109
CGGCAGCC 0.0628316	CGGCAGCC	0.0628316
CGGGCCAG 0.0628316	CGGGCCAG	0.0628316
CCTCGGGC 0.0628316	CCTCGGGC	0.0628316
GGCAGGCC 0.0628316	GGCAGGCC	0.0628316
CTCCAGGA 0.0628316	CTCCAGGA	0.0628316
CTCCTCTC 0.0628316	CTCCTCTC	0.0628316
CGGGTCCC 0.0625524	CGGGTCCC	0.0625524
CCGGCAGC 0.0625524	CCGGCAGC	0.0625524
CCGGGTCC 0.0625524	CCGGGTCC	0.0625524
CACCGCCC 0.0625524	CACCGCCC	0.0625524
CCACCCGG 0.0625524	CCACCCGG	0.0625524
GCTCCCCC 0.0625524	GCTCCCCC	0.0625524
CGCTCGGC 0.0622731	CGCTCGGC	0.0622731
CGGCGCCG 0.0622731	CGGCGCCG	0.0622731
CCCCGAGG 0.0622731	CCCCGAGG	0.0622731
CCTCCTCG 0.0622731	CCTCCTCG	0.0622731
CCCGCAGG 0.0622731	CCCGCAGG	0.0622731
CTCCTCCA 0.0622731	CTCCTCCA	0.0622731
CCCACTCC 0.0619939	CCCACTCC	0.0619939
AGCGGGCG 0.0619939	AGCGGGCG	0.0619939
CCACCCTC 0.0619939	CCACCCTC	0.0619939
GCGCGCAC 0.0619939	GCGCGCAC	0.0619939
CAGGAGGC 0.0619939	CAGGAGGC	0.0619939
CGGGGACC 0.0617146	CGGGGACC	0.0617146
CCAGGAGG 0.0617146	CCAGGAGG	0.0617146
CCCCAGGG 0.0617146	CCCCAGGG	0.0617146
AGCCCGCG 0.0617146	AGCCCGCG	0.0617146
AGCGCAGC 0.0617146	AGCGCAGC	0.0617146
CACCGCCG 0.0617146	CACCGCCG	0.0617146
CTCAGGCC 0.0617146	CTCAGGCC	0.0617146
CGCTCCTC 0.0614354	CGCTCCTC	0.0614354
CCCCTCGG 0.0614354	CCCCTCGG	0.0614354
AGCGAGCG 0.0614354	AGCGAGCG	0.0614354
AGGAGGCC 0.0614354	AGGAGGCC	0.0614354
CCGAGGCG 0.0614354	CCGAGGCG	0.0614354
GGAAGGGA 0.0614354	GGAAGGGA	0.0614354
GGAGCCCA 0.0614354	GGAGCCCA	0.0614354
GGCCAGCC 0.0614354	GGCCAGCC	0.0614354
CAGCCGGG 0.0614354	CAGCCGGG	0.0614354
GAGAGAGA 0.0614354	GAGAGAGA	0.0614354
CTCGCGCC 0.0614354	CTCGCGCC	0.0614354
CTGGCCTC 0.0611561	CTGGCCTC	0.0611561
CTGGCTCC 0.0611561	CTGGCTCC	0.0611561
CCCCGAGC 0.0611561	CCCCGAGC	0.0611561
CCTCGCGC 0.0611561	CCTCGCGC	0.0611561
GCGAGCGC 0.0611561	GCGAGCGC	0.0611561
CCGCGTCC 0.0611561	CCGCGTCC	0.0611561
GAGGCGCC 0.0611561	GAGGCGCC	0.0611561
CTCCACCC 0.0611561	CTCCACCC	0.0611561
CGAGCCCC 0.0608769	CGAGCCCC	0.0608769
CCGGGCCA 0.0608769	CCGGGCCA	0.0608769
AGCGCGCG 0.0608769	AGCGCGCG	0.0608769
AAGATGGC 0.0608769	AAGATGGC	0.0608769
AGCTGGGG 0.0608769	AGCTGGGG	0.0608769
GAGCAGCC 0.0608769	GAGCAGCC	0.0608769
CTCCCCAG 0.0608769	CTCCCCAG	0.0608769
GCAGGAGC 0.0605976	GCAGGAGC	0.0605976
CCTCGCTC 0.0605976	CCTCGCTC	0.0605976
AGCGGCGC 0.0605976	AGCGGCGC	0.0605976
AGGCAGAG 0.0605976	AGGCAGAG	0.0605976
AGGCAGGC 0.0605976	AGGCAGGC	0.0605976
AGGCGGGA 0.0605976	AGGCGGGA	0.0605976
GCCGCCCA 0.0605976	GCCGCCCA	0.0605976
ACACACAC 0.0605976	ACACACAC	0.0605976
GGCAGCCC 0.0605976	GGCAGCCC	0.0605976
GGCCGGCC 0.0605976	GGCCGGCC	0.0605976
CTCGCCCC 0.0605976	CTCGCCCC	0.0605976
CGGGCGGA 0.0603183	CGGGCGGA	0.0603183
GGGGACCC 0.0603183	GGGGACCC	0.0603183
CCCACCGC 0.0603183	CCCACCGC	0.0603183
CCCACCTC 0.0603183	CCCACCTC	0.0603183
CCCCCTTC 0.0603183	CCCCCTTC	0.0603183
GAGCCTGC 0.0603183	GAGCCTGC	0.0603183
CGAGCGCG 0.0600391	CGAGCGCG	0.0600391
CGCAGGGC 0.0600391	CGCAGGGC	0.0600391
CTGGGAGC 0.0600391	CTGGGAGC	0.0600391
CCGGGACC 0.0600391	CCGGGACC	0.0600391
CGCTGGGC 0.0597598	CGCTGGGC	0.0597598
CGAGCGGC 0.0597598	CGAGCGGC	0.0597598
CACCCGCC 0.0597598	CACCCGCC	0.0597598
AGCTGGGC 0.0597598	AGCTGGGC	0.0597598
AGGCAGGG 0.0597598	AGGCAGGG	0.0597598
GCGCGAGC 0.0597598	GCGCGAGC	0.0597598
GCCTCCCA 0.0597598	GCCTCCCA	0.0597598
GCGCACGC 0.0597598	GCGCACGC	0.0597598
GGCGCGGA 0.0597598	GGCGCGGA	0.0597598
CAGCAGCG 0.0597598	CAGCAGCG	0.0597598
CAGCTCCG 0.0597598	CAGCTCCG	0.0597598
CTCTGCCC 0.0597598	CTCTGCCC	0.0597598
CGCTGGCC 0.0594806	CGCTGGCC	0.0594806
CGAGGGCG 0.0594806	CGAGGGCG	0.0594806
GGGCCGGA 0.0594806	GGGCCGGA	0.0594806
AGGAGGAA 0.0594806	AGGAGGAA	0.0594806
GGAGGGCC 0.0594806	GGAGGGCC	0.0594806
CAGGGCAG 0.0594806	CAGGGCAG	0.0594806
GAGGCGGA 0.0594806	GAGGCGGA	0.0594806
CTGCCCTC 0.0592013	CTGCCCTC	0.0592013
CTGCCTGC 0.0592013	CTGCCTGC	0.0592013
CCAGGAGC 0.0592013	CCAGGAGC	0.0592013
CCCCGCCA 0.0592013	CCCCGCCA	0.0592013
GCTCAGCC 0.0592013	GCTCAGCC	0.0592013
CCCTCCGG 0.0592013	CCCTCCGG	0.0592013
CAGCCCCA 0.0592013	CAGCCCCA	0.0592013
CAGCTGCC 0.0592013	CAGCTGCC	0.0592013
CTCGCTCC 0.0592013	CTCGCTCC	0.0592013
CGGGAGAG 0.0589221	CGGGAGAG	0.0589221
AGCCGCCC 0.0589221	AGCCGCCC	0.0589221
AGCCGGAG 0.0589221	AGCCGGAG	0.0589221
AGGCGCCG 0.0589221	AGGCGCCG	0.0589221
GCCCTTCC 0.0589221	GCCCTTCC	0.0589221
GCCGGGAC 0.0589221	GCCGGGAC	0.0589221
GCGCCACC 0.0589221	GCGCCACC	0.0589221
CAGGCAGG 0.0589221	CAGGCAGG	0.0589221
AGGGCCGC 0.0589221	AGGGCCGC	0.0589221
AGGGCCGG 0.0589221	AGGGCCGG	0.0589221
CGGCGCTC 0.0586428	CGGCGCTC	0.0586428
GGGCTGGA 0.0586428	GGGCTGGA	0.0586428
CTTCCCCC 0.0586428	CTTCCCCC	0.0586428
CCCAGCCA 0.0586428	CCCAGCCA	0.0586428
CCCCACTC 0.0586428	CCCCACTC	0.0586428
CCAGCAGG 0.0586428	CCAGCAGG	0.0586428
GCGGCCCA 0.0586428	GCGGCCCA	0.0586428
GAAAAAAA 0.0586428	GAAAAAAA	0.0586428
CTCCCCAC 0.0586428	CTCCCCAC	0.0586428
AAGGGAGG 0.0583636	AAGGGAGG	0.0583636
CGCAGCAG 0.0583636	CGCAGCAG	0.0583636
CGCCACCC 0.0583636	CGCCACCC	0.0583636
CGCCGGGA 0.0583636	CGCCGGGA	0.0583636
CGCCTGCC 0.0583636	CGCCTGCC	0.0583636
AGAGGCGG 0.0583636	AGAGGCGG	0.0583636
GGGGGGGA 0.0583636	GGGGGGGA	0.0583636
CCTCGCCG 0.0583636	CCTCGCCG	0.0583636
CACCCAGG 0.0583636	CACCCAGG	0.0583636
CCACCCCA 0.0583636	CCACCCCA	0.0583636
CCAGCCGG 0.0583636	CCAGCCGG	0.0583636
CAGCCCTC 0.0583636	CAGCCCTC	0.0583636
CCTTTCCC 0.0583636	CCTTTCCC	0.0583636
CGCAGCTC 0.0580843	CGCAGCTC	0.0580843
CGCGAGGC 0.0580843	CGCGAGGC	0.0580843
CTGCGCTC 0.0580843	CTGCGCTC	0.0580843
CTGGAGGC 0.0580843	CTGGAGGC	0.0580843
CACCCCCC 0.0580843	CACCCCCC	0.0580843
AGGCCTCC 0.0580843	AGGCCTCC	0.0580843
GCGGCGAC 0.0580843	GCGGCGAC	0.0580843
GCGTCCCC 0.0580843	GCGTCCCC	0.0580843
GCCTTCCC 0.0580843	GCCTTCCC	0.0580843
CCCTTTCC 0.0580843	CCCTTTCC	0.0580843
GGACCACC 0.0580843	GGACCACC	0.0580843
CAGGCCCA 0.0580843	CAGGCCCA	0.0580843
CCTGGCAG 0.0580843	CCTGGCAG	0.0580843
CGGCGCAG 0.0578051	CGGCGCAG	0.0578051
CCCCCAGG 0.0578051	CCCCCAGG	0.0578051
CACCTCCC 0.0578051	CACCTCCC	0.0578051
AGGAGGGC 0.0578051	AGGAGGGC	0.0578051
AGGCCAGC 0.0578051	AGGCCAGC	0.0578051
CCACAGCC 0.0578051	CCACAGCC	0.0578051
GGCGGGAC 0.0578051	GGCGGGAC	0.0578051
CAGCTGGG 0.0578051	CAGCTGGG	0.0578051
AGCTGCGG 0.0575258	AGCTGCGG	0.0575258
GCCCCGCA 0.0575258	GCCCCGCA	0.0575258
CTCGGCTC 0.0575258	CTCGGCTC	0.0575258
AGGGGCCG 0.0575258	AGGGGCCG	0.0575258
CCTGAGCC 0.0575258	CCTGAGCC	0.0575258
CGCGGCCA 0.0572466	CGCGGCCA	0.0572466
CGAGCGAG 0.0572466	CGAGCGAG	0.0572466
CGCCCGCA 0.0572466	CGCCCGCA	0.0572466
CCCCCTGC 0.0572466	CCCCCTGC	0.0572466
CCGGGGAC 0.0572466	CCGGGGAC	0.0572466
CACCCACC 0.0572466	CACCCACC	0.0572466
CCACCACC 0.0572466	CCACCACC	0.0572466
GCCGCCGA 0.0572466	GCCGCCGA	0.0572466
GCCTCAGC 0.0572466	GCCTCAGC	0.0572466
CAGGCGCC 0.0572466	CAGGCGCC	0.0572466
CTCCGGGA 0.0572466	CTCCGGGA	0.0572466
CCTGGGAA 0.0572466	CCTGGGAA	0.0572466
CGGCCGCA 0.0569673	CGGCCGCA	0.0569673
CGGCTCGC 0.0569673	CGGCTCGC	0.0569673
CGGTGGCC 0.0569673	CGGTGGCC	0.0569673
CCCAGGAG 0.0569673	CCCAGGAG	0.0569673
CCCCTCCA 0.0569673	CCCCTCCA	0.0569673
CCCGAGGG 0.0569673	CCCGAGGG	0.0569673
AGCAGCCC 0.0569673	AGCAGCCC	0.0569673
AGCCCACC 0.0569673	AGCCCACC	0.0569673
AGCCCCAG 0.0569673	AGCCCCAG	0.0569673
AGCCGCGC 0.0569673	AGCCGCGC	0.0569673
CCACACAC 0.0569673	CCACACAC	0.0569673
CCGCGCGG 0.0569673	CCGCGCGG	0.0569673
GAGCAGGC 0.0569673	GAGCAGGC	0.0569673
CTCTGGGC 0.0569673	CTCTGGGC	0.0569673
CTCTTCCC 0.0569673	CTCTTCCC	0.0569673
CGCTCTCC 0.0566881	CGCTCTCC	0.0566881
AGTGGGGG 0.0566881	AGTGGGGG	0.0566881
CCCCCCCA 0.0566881	CCCCCCCA	0.0566881
CCGGCCCA 0.0566881	CCGGCCCA	0.0566881
AGCCCTCC 0.0566881	AGCCCTCC	0.0566881
AGCCTGGC 0.0566881	AGCCTGGC	0.0566881
AGCGGGGC 0.0566881	AGCGGGGC	0.0566881
ACCGCGGC 0.0566881	ACCGCGGC	0.0566881
CCGCGCAG 0.0566881	CCGCGCAG	0.0566881
CAGCCTGC 0.0566881	CAGCCTGC	0.0566881
CTCCGCTC 0.0566881	CTCCGCTC	0.0566881
CGCGTCCC 0.0564088	CGCGTCCC	0.0564088
CCCACGCC 0.0564088	CCCACGCC	0.0564088
CCCCCCCC 0.0564088	CCCCCCCC	0.0564088
CACCCTCC 0.0564088	CACCCTCC	0.0564088
GCCCCGGA 0.0564088	GCCCCGGA	0.0564088
CAGCCGGC 0.0564088	CAGCCGGC	0.0564088
CAGCGGGG 0.0564088	CAGCGGGG	0.0564088
CAGGCGCG 0.0564088	CAGGCGCG	0.0564088
GAGAGGCC 0.0564088	GAGAGGCC	0.0564088
AGGGCAGG 0.0564088	AGGGCAGG	0.0564088
CGCCCCAC 0.0561296	CGCCCCAC	0.0561296
AGAGCCTG 0.0561296	AGAGCCTG	0.0561296
CCGGCTCG 0.0561296	CCGGCTCG	0.0561296
CCGGGAAG 0.0561296	CCGGGAAG	0.0561296
AGCTGGAG 0.0561296	AGCTGGAG	0.0561296
CCACGCCC 0.0561296	CCACGCCC	0.0561296
CCAGACCC 0.0561296	CCAGACCC	0.0561296
CCCGGCAG 0.0561296	CCCGGCAG	0.0561296
CCGCCCGA 0.0561296	CCGCCCGA	0.0561296
CCGCCTTC 0.0561296	CCGCCTTC	0.0561296
CGCGAGCC 0.0558503	CGCGAGCC	0.0558503
CTGAGCCC 0.0558503	CTGAGCCC	0.0558503
CTTCCCGC 0.0558503	CTTCCCGC	0.0558503
AGCAGGCC 0.0558503	AGCAGGCC	0.0558503
AGCGCCCC 0.0558503	AGCGCCCC	0.0558503
CACCCCGC 0.0558503	CACCCCGC	0.0558503
ACCCGGCC 0.0558503	ACCCGGCC	0.0558503
GCGGGGCA 0.0558503	GCGGGGCA	0.0558503
CCCGCCAC 0.0558503	CCCGCCAC	0.0558503
CCCTGCGG 0.0558503	CCCTGCGG	0.0558503
GGCAGGGA 0.0558503	GGCAGGGA	0.0558503
GAGCTGGC 0.0558503	GAGCTGGC	0.0558503
CCAGGGCG 0.0555711	CCAGGGCG	0.0555711
CCCAACCC 0.0555711	CCCAACCC	0.0555711
CCCTGCAG 0.0555711	CCCTGCAG	0.0555711
ACGCCGCC 0.0555711	ACGCCGCC	0.0555711
CGGGACCC 0.0552918	CGGGACCC	0.0552918
GACCCCGC 0.0552918	GACCCCGC	0.0552918
CCCCAGCG 0.0552918	CCCCAGCG	0.0552918
AGGAGCCG 0.0552918	AGGAGCCG	0.0552918
CCACGGCC 0.0552918	CCACGGCC	0.0552918
GGAGCGGA 0.0552918	GGAGCGGA	0.0552918
CAGCCACC 0.0552918	CAGCCACC	0.0552918
CAGGGCGC 0.0552918	CAGGGCGC	0.0552918
GAGGGGAA 0.0552918	GAGGGGAA	0.0552918
AGCCAGGG 0.0550126	AGCCAGGG	0.0550126
AGCCGCAG 0.0550126	AGCCGCAG	0.0550126
AGCGCCGG 0.0550126	AGCGCCGG	0.0550126
ACCCCTCC 0.0550126	ACCCCTCC	0.0550126
AGCTCCAG 0.0550126	AGCTCCAG	0.0550126
AGGCAGCC 0.0550126	AGGCAGCC	0.0550126
CCCTCTGC 0.0550126	CCCTCTGC	0.0550126
AGGGCGCG 0.0550126	AGGGCGCG	0.0550126
AGGGGAAG 0.0550126	AGGGGAAG	0.0550126
CGAGCCCG 0.0547333	CGAGCCCG	0.0547333
CCCAGAGG 0.0547333	CCCAGAGG	0.0547333
AGCGGGAG 0.0547333	AGCGGGAG	0.0547333
AGGAGCAG 0.0547333	AGGAGCAG	0.0547333
CCCTCCAC 0.0547333	CCCTCCAC	0.0547333
CCGAGGGC 0.0547333	CCGAGGGC	0.0547333
CAGGGAGC 0.0547333	CAGGGAGC	0.0547333
AGGGGCGC 0.0547333	AGGGGCGC	0.0547333
CGGGCCCG 0.0544541	CGGGCCCG	0.0544541
GGGCAGGA 0.0544541	GGGCAGGA	0.0544541
GGGCCACC 0.0544541	GGGCCACC	0.0544541
AGCCCTGG 0.0544541	AGCCCTGG	0.0544541
AGCGGCCC 0.0544541	AGCGGCCC	0.0544541
ACCCTCCC 0.0544541	ACCCTCCC	0.0544541
GCTGAGCC 0.0544541	GCTGAGCC	0.0544541
GCCCAGGA 0.0544541	GCCCAGGA	0.0544541
CAGGGGGC 0.0544541	CAGGGGGC	0.0544541
GAGAGCGC 0.0544541	GAGAGCGC	0.0544541
GAGCCGGA 0.0544541	GAGCCGGA	0.0544541
GAGGCTCC 0.0544541	GAGGCTCC	0.0544541
AGGGGCTG 0.0544541	AGGGGCTG	0.0544541
CGCCGGAG 0.0541748	CGCCGGAG	0.0541748
CTGCCCAG 0.0541748	CTGCCCAG	0.0541748
CTGGGGGA 0.0541748	CTGGGGGA	0.0541748
CACCCAGC 0.0541748	CACCCAGC	0.0541748
GCCACGGC 0.0541748	GCCACGGC	0.0541748
GCCCCCCA 0.0541748	GCCCCCCA	0.0541748
GCCTGAGC 0.0541748	GCCTGAGC	0.0541748
CCCGCACC 0.0541748	CCCGCACC	0.0541748
CTTCCTGC 0.0541748	CTTCCTGC	0.0541748
AGGGAGCC 0.0541748	AGGGAGCC	0.0541748
CCTTCCCG 0.0541748	CCTTCCCG	0.0541748
GGGCTGCA 0.0538956	GGGCTGCA	0.0538956
CATGGCGG 0.0538956	CATGGCGG	0.0538956
CTGGCCCC 0.0538956	CTGGCCCC	0.0538956
CCGGCCGG 0.0538956	CCGGCCGG	0.0538956
CCACCAGC 0.0538956	CCACCAGC	0.0538956
CCCTGCTC 0.0538956	CCCTGCTC	0.0538956
GGCAGCCA 0.0538956	GGCAGCCA	0.0538956
CAGCTGCA 0.0538956	CAGCTGCA	0.0538956
GAGGAAGA 0.0538956	GAGGAAGA	0.0538956
CGGCTGGC 0.0536163	CGGCTGGC	0.0536163
CTGGCAGC 0.0536163	CTGGCAGC	0.0536163
GACGCCGC 0.0536163	GACGCCGC	0.0536163
CCCCAGAG 0.0536163	CCCCAGAG	0.0536163
CCCCTGGC 0.0536163	CCCCTGGC	0.0536163
AGCTCCGC 0.0536163	AGCTCCGC	0.0536163
CCAGAGGC 0.0536163	CCAGAGGC	0.0536163
CCCGGGTC 0.0536163	CCCGGGTC	0.0536163
CCGCGGGA 0.0536163	CCGCGGGA	0.0536163
GGCGGGAA 0.0536163	GGCGGGAA	0.0536163
AGGCTGCG 0.0536163	AGGCTGCG	0.0536163
CGGCCCTC 0.0533371	CGGCCCTC	0.0533371
AGAGAGGG 0.0533371	AGAGAGGG	0.0533371
CACCCGGC 0.0533371	CACCCGGC	0.0533371
GCCCTCGC 0.0533371	GCCCTCGC	0.0533371
CCCTGGGA 0.0533371	CCCTGGGA	0.0533371
GGCGCCGA 0.0533371	GGCGCCGA	0.0533371
CAGGAGGG 0.0533371	CAGGAGGG	0.0533371
ACGGCGGC 0.0533371	ACGGCGGC	0.0533371
CTCCCTTC 0.0533371	CTCCCTTC	0.0533371
CTCTCCAG 0.0533371	CTCTCCAG	0.0533371
CGAGCCGC 0.0530578	CGAGCCGC	0.0530578
CGAGGGGC 0.0530578	CGAGGGGC	0.0530578
CGCCTCTC 0.0530578	CGCCTCTC	0.0530578
CTGCCACC 0.0530578	CTGCCACC	0.0530578
CCCCACGC 0.0530578	CCCCACGC	0.0530578
AGGAGCCC 0.0530578	AGGAGCCC	0.0530578
GCTGCAGC 0.0530578	GCTGCAGC	0.0530578
GCTGGCCC 0.0530578	GCTGGCCC	0.0530578
CCGCACCC 0.0530578	CCGCACCC	0.0530578
CCGCGCCA 0.0530578	CCGCGCCA	0.0530578
CAGAGCTG 0.0530578	CAGAGCTG	0.0530578
GAGCCTCC 0.0530578	GAGCCTCC	0.0530578
AGGGCAGC 0.0530578	AGGGCAGC	0.0530578
AGGGCCTG 0.0530578	AGGGCCTG	0.0530578
CGGCGTCC 0.0527786	CGGCGTCC	0.0527786
GCAGCCAC 0.0527786	GCAGCCAC	0.0527786
AGATGGCG 0.0527786	AGATGGCG	0.0527786
CTGGAGGA 0.0527786	CTGGAGGA	0.0527786
AGCGCCCG 0.0527786	AGCGCCCG	0.0527786
AGGAGCGG 0.0527786	AGGAGCGG	0.0527786
CCACCGCG 0.0527786	CCACCGCG	0.0527786
CAGGAGCC 0.0527786	CAGGAGCC	0.0527786
CAGGGGCG 0.0527786	CAGGGGCG	0.0527786
CTCGGAGC 0.0527786	CTCGGAGC	0.0527786
CGGAGCAG 0.0524993	CGGAGCAG	0.0524993
CGCGCGCA 0.0524993	CGCGCGCA	0.0524993
AGAGCCGG 0.0524993	AGAGCCGG	0.0524993
CCGTCCCC 0.0524993	CCGTCCCC	0.0524993
CACCCCAC 0.0524993	CACCCCAC	0.0524993
CACCCGGG 0.0524993	CACCCGGG	0.0524993
GCCACCCC 0.0524993	GCCACCCC	0.0524993
GCGCCAGC 0.0524993	GCGCCAGC	0.0524993
CCCTGGAG 0.0524993	CCCTGGAG	0.0524993
GAGCGGGA 0.0524993	GAGCGGGA	0.0524993
CGCCCGAG 0.0522201	CGCCCGAG	0.0522201
CGGGTGGC 0.0522201	CGGGTGGC	0.0522201
CCAGCGGC 0.0522201	CCAGCGGC	0.0522201
CCCCACCG 0.0522201	CCCCACCG	0.0522201
CCCCTGCG 0.0522201	CCCCTGCG	0.0522201
CCCGACCC 0.0522201	CCCGACCC	0.0522201
CCTCTCCG 0.0522201	CCTCTCCG	0.0522201
AGCCCTGC 0.0522201	AGCCCTGC	0.0522201
ACCAGGCC 0.0522201	ACCAGGCC	0.0522201
ACCCCCAC 0.0522201	ACCCCCAC	0.0522201
AGCTCCGG 0.0522201	AGCTCCGG	0.0522201
CCAGCACC 0.0522201	CCAGCACC	0.0522201
CCCGCTCG 0.0522201	CCCGCTCG	0.0522201
CCCGGCCA 0.0522201	CCCGGCCA	0.0522201
CCCTCAGC 0.0522201	CCCTCAGC	0.0522201
GGAGAGCC 0.0522201	GGAGAGCC	0.0522201
CTCTCTGC 0.0522201	CTCTCTGC	0.0522201
AGGCTGGC 0.0522201	AGGCTGGC	0.0522201
AGGGCTGC 0.0522201	AGGGCTGC	0.0522201
AGGGGTGG 0.0522201	AGGGGTGG	0.0522201
CTGTCCCC 0.0519408	CTGTCCCC	0.0519408
CCGTGGCC 0.0519408	CCGTGGCC	0.0519408
AGCAGGGC 0.0519408	AGCAGGGC	0.0519408
GCCCAGCA 0.0519408	GCCCAGCA	0.0519408
CCGCGAGG 0.0519408	CCGCGAGG	0.0519408
CAGGCTGC 0.0519408	CAGGCTGC	0.0519408
CTCCGCAG 0.0519408	CTCCGCAG	0.0519408
CTCTCCGC 0.0519408	CTCTCCGC	0.0519408
CGGGGAAG 0.0516615	CGGGGAAG	0.0516615
CGGGGACG 0.0516615	CGGGGACG	0.0516615
CGCAGAGC 0.0516615	CGCAGAGC	0.0516615
GGGCCCCC 0.0516615	GGGCCCCC	0.0516615
CCAGGCCA 0.0516615	CCAGGCCA	0.0516615
CACCGCGG 0.0516615	CACCGCGG	0.0516615
GCGGGTCC 0.0516615	GCGGGTCC	0.0516615
GCCAGAGC 0.0516615	GCCAGAGC	0.0516615
GGAGGCCA 0.0516615	GGAGGCCA	0.0516615
GGCCCCAC 0.0516615	GGCCCCAC	0.0516615
CAGGGGAG 0.0516615	CAGGGGAG	0.0516615
CTCTGCAG 0.0516615	CTCTGCAG	0.0516615
CTGAGGCC 0.0513823	CTGAGGCC	0.0513823
AAAAAAAG 0.0513823	AAAAAAAG	0.0513823
CCCCCCGG 0.0513823	CCCCCCGG	0.0513823
CCGGCAGG 0.0513823	CCGGCAGG	0.0513823
CCGGCCAC 0.0513823	CCGGCCAC	0.0513823
AGCCGGCG 0.0513823	AGCCGGCG	0.0513823
AGCGGAGG 0.0513823	AGCGGAGG	0.0513823
CACCGCGC 0.0513823	CACCGCGC	0.0513823
AGGCCCTG 0.0513823	AGGCCCTG	0.0513823
AGGCGCTG 0.0513823	AGGCGCTG	0.0513823
GCGGCCGA 0.0513823	GCGGCCGA	0.0513823
GCGGGACC 0.0513823	GCGGGACC	0.0513823
CCGAGCGG 0.0513823	CCGAGCGG	0.0513823
GGCGGAGA 0.0513823	GGCGGAGA	0.0513823
CAGCGCGC 0.0513823	CAGCGCGC	0.0513823
CTCGCGGC 0.0513823	CTCGCGGC	0.0513823
CTCTGGCC 0.0513823	CTCTGGCC	0.0513823
AGAGGGCG 0.051103	AGAGGGCG	0.051103
GGGCAGCA 0.051103	GGGCAGCA	0.051103
GGGCTCCA 0.051103	GGGCTCCA	0.051103
CTGCCGGC 0.051103	CTGCCGGC	0.051103
CCGGCCAG 0.051103	CCGGCCAG	0.051103
AGCCGGCC 0.051103	AGCCGGCC	0.051103
ACCCAGGC 0.051103	ACCCAGGC	0.051103
AGGCCTGC 0.051103	AGGCCTGC	0.051103
CCAGCCCA 0.051103	CCAGCCCA	0.051103
GCCAGGGA 0.051103	GCCAGGGA	0.051103
GGCGAGCC 0.051103	GGCGAGCC	0.051103
GGCGCGCA 0.051103	GGCGCGCA	0.051103
CGCGGCAG 0.0508238	CGCGGCAG	0.0508238
CGGCTTCC 0.0508238	CGGCTTCC	0.0508238
GCACCGCC 0.0508238	GCACCGCC	0.0508238
CGCCTTCC 0.0508238	CGCCTTCC	0.0508238
CTGCAGCA 0.0508238	CTGCAGCA	0.0508238
CTGCTGGC 0.0508238	CTGCTGGC	0.0508238
CCCCGGGG 0.0508238	CCCCGGGG	0.0508238
CCAAGGCC 0.0508238	CCAAGGCC	0.0508238
GCTGGGAA 0.0508238	GCTGGGAA	0.0508238
CCGCGAGC 0.0508238	CCGCGAGC	0.0508238
CCGCGGTC 0.0508238	CCGCGGTC	0.0508238
GGAGCGCC 0.0508238	GGAGCGCC	0.0508238
CAGGGCTC 0.0508238	CAGGGCTC	0.0508238
CTTCTCCC 0.0508238	CTTCTCCC	0.0508238
AGGGGAGC 0.0508238	AGGGGAGC	0.0508238
GGGAGGCA 0.0505445	GGGAGGCA	0.0505445
CCCCAACC 0.0505445	CCCCAACC	0.0505445
AGCCAGAG 0.0505445	AGCCAGAG	0.0505445
CACAGCCC 0.0505445	CACAGCCC	0.0505445
GCGGGAGA 0.0505445	GCGGGAGA	0.0505445
GCTGCGGA 0.0505445	GCTGCGGA	0.0505445
CCCTGCCG 0.0505445	CCCTGCCG	0.0505445
CCGAGGAG 0.0505445	CCGAGGAG	0.0505445
CAGCGGGC 0.0505445	CAGCGGGC	0.0505445
CTTCCTTC 0.0505445	CTTCCTTC	0.0505445
CTTTCCCC 0.0505445	CTTTCCCC	0.0505445
CGCTGCTC 0.0502653	CGCTGCTC	0.0502653
GGCTTCCC 0.0502653	GGCTTCCC	0.0502653
CCCAGCGG 0.0502653	CCCAGCGG	0.0502653
AGCCCCTC 0.0502653	AGCCCCTC	0.0502653
ACCCGGGC 0.0502653	ACCCGGGC	0.0502653
AGGCGCGC 0.0502653	AGGCGCGC	0.0502653
GCGGCGCA 0.0502653	GCGGCGCA	0.0502653
CCCGGGAA 0.0502653	CCCGGGAA	0.0502653
CAGAGGGG 0.0502653	CAGAGGGG	0.0502653
CTCTGCTC 0.0502653	CTCTGCTC	0.0502653
CTTCCGCC 0.049986	CTTCCGCC	0.049986
AGCTCCCG 0.049986	AGCTCCCG	0.049986
AGCTGCCC 0.049986	AGCTGCCC	0.049986
CCACACCC 0.049986	CCACACCC	0.049986
CCACTCCC 0.049986	CCACTCCC	0.049986
GGCCCGCA 0.049986	GGCCCGCA	0.049986
GGCCTGCA 0.049986	GGCCTGCA	0.049986
CTCCTGGC 0.049986	CTCCTGGC	0.049986
CGGCCCCA 0.0497068	CGGCCCCA	0.0497068
GGGAGACC 0.0497068	GGGAGACC	0.0497068
CTGCGGGA 0.0497068	CTGCGGGA	0.0497068
CTGGCGCC 0.0497068	CTGGCGCC	0.0497068
CCCAGACC 0.0497068	CCCAGACC	0.0497068
CCCGAGCG 0.0497068	CCCGAGCG	0.0497068
CACGCCGC 0.0497068	CACGCCGC	0.0497068
AGGAAGAG 0.0497068	AGGAAGAG	0.0497068
GCTCTGCC 0.0497068	GCTCTGCC	0.0497068
CCGCCGTC 0.0497068	CCGCCGTC	0.0497068
GGCCAGGA 0.0497068	GGCCAGGA	0.0497068
CACTTCCG 0.0497068	CACTTCCG	0.0497068
CAGAGGGC 0.0497068	CAGAGGGC	0.0497068
CAGGAAGG 0.0497068	CAGGAAGG	0.0497068
AGGCTCCG 0.0497068	AGGCTCCG	0.0497068
AGGGGCAG 0.0497068	AGGGGCAG	0.0497068
CGCTTCCC 0.0494275	CGCTTCCC	0.0494275
CGGCCACG 0.0494275	CGGCCACG	0.0494275
CGGCGAGC 0.0494275	CGGCGAGC	0.0494275
AGAGGCAG 0.0494275	AGAGGCAG	0.0494275
CCCAGGGA 0.0494275	CCCAGGGA	0.0494275
CCCCCTCG 0.0494275	CCCCCTCG	0.0494275
AGCCGGGA 0.0494275	AGCCGGGA	0.0494275
CACTCACC 0.0494275	CACTCACC	0.0494275
CCCGGGCA 0.0494275	CCCGGGCA	0.0494275
GGCCTCCA 0.0494275	GGCCTCCA	0.0494275
GGCGCCCA 0.0494275	GGCGCCCA	0.0494275
CAGCTGGC 0.0494275	CAGCTGGC	0.0494275
GAGCTGGA 0.0494275	GAGCTGGA	0.0494275
GAGGGGAC 0.0494275	GAGGGGAC	0.0494275
AGGGAGCG 0.0494275	AGGGAGCG	0.0494275
CGAGGCGC 0.0491483	CGAGGCGC	0.0491483
AGAGGAAG 0.0491483	AGAGGAAG	0.0491483
GGGGGAGA 0.0491483	GGGGGAGA	0.0491483
GACGCGGC 0.0491483	GACGCGGC	0.0491483
CACACACC 0.0491483	CACACACC	0.0491483
ACCCGCCC 0.0491483	ACCCGCCC	0.0491483
AGGCAGCG 0.0491483	AGGCAGCG	0.0491483
GCCGGGAA 0.0491483	GCCGGGAA	0.0491483
GCGCCGCA 0.0491483	GCGCCGCA	0.0491483
GGAGGGCA 0.0491483	GGAGGGCA	0.0491483
GGCCGCGA 0.0491483	GGCCGCGA	0.0491483
CAGCAGGG 0.0491483	CAGCAGGG	0.0491483
GAGCTGCC 0.0491483	GAGCTGCC	0.0491483
AGGCTGAG 0.0491483	AGGCTGAG	0.0491483
AGGTGGGG 0.0491483	AGGTGGGG	0.0491483
CGAGCGCC 0.048869	CGAGCGCC	0.048869
CGCAGCCA 0.048869	CGCAGCCA	0.048869
AGAGGCCG 0.048869	AGAGGCCG	0.048869
GGGCCGCA 0.048869	GGGCCGCA	0.048869
CTGGGAAG 0.048869	CTGGGAAG	0.048869
CGGTCCCC 0.048869	CGGTCCCC	0.048869
AGCCGCTG 0.048869	AGCCGCTG	0.048869
CACCCACA 0.048869	CACCCACA	0.048869
AAGGAGGG 0.048869	AAGGAGGG	0.048869
CCCGCGAG 0.048869	CCCGCGAG	0.048869
CAGCCGCA 0.048869	CAGCCGCA	0.048869
CAGGAGAG 0.048869	CAGGAGAG	0.048869
AGGGGGCC 0.048869	AGGGGGCC	0.048869
CGAGGGAG 0.0485898	CGAGGGAG	0.0485898
CTGCTTCC 0.0485898	CTGCTTCC	0.0485898
CCCAGGGG 0.0485898	CCCAGGGG	0.0485898
CCGGAGGA 0.0485898	CCGGAGGA	0.0485898
CCGGGAGA 0.0485898	CCGGGAGA	0.0485898
CCGGGTGC 0.0485898	CCGGGTGC	0.0485898
GCTTCTCC 0.0485898	GCTTCTCC	0.0485898
GAGCGCCC 0.0485898	GAGCGCCC	0.0485898
GAGGAAGC 0.0485898	GAGGAAGC	0.0485898
GAGGCCGA 0.0485898	GAGGCCGA	0.0485898
GAAGCGGC 0.0485898	GAAGCGGC	0.0485898
CTCCGCCA 0.0485898	CTCCGCCA	0.0485898
CGGGAAGC 0.0483105	CGGGAAGC	0.0483105
AGAGCTGG 0.0483105	AGAGCTGG	0.0483105
GGGACCCC 0.0483105	GGGACCCC	0.0483105
CTGCAGGA 0.0483105	CTGCAGGA	0.0483105
CTGGAAGC 0.0483105	CTGGAAGC	0.0483105
AGCCCGAG 0.0483105	AGCCCGAG	0.0483105
AGCGGCAG 0.0483105	AGCGGCAG	0.0483105
AGCGGCTG 0.0483105	AGCGGCTG	0.0483105
CCGAGCTC 0.0483105	CCGAGCTC	0.0483105
CAGCACCC 0.0483105	CAGCACCC	0.0483105
AGGGCCAG 0.0483105	AGGGCCAG	0.0483105
CCTGGGGA 0.0483105	CCTGGGGA	0.0483105
CGCTGCAG 0.0480313	CGCTGCAG	0.0480313
GGCTCCCA 0.0480313	GGCTCCCA	0.0480313
CTGGGGAC 0.0480313	CTGGGGAC	0.0480313
GACCCGGC 0.0480313	GACCCGGC	0.0480313
CCTCTGGC 0.0480313	CCTCTGGC	0.0480313
AGCCTCCG 0.0480313	AGCCTCCG	0.0480313
GCCGGGCA 0.0480313	GCCGGGCA	0.0480313
CCCGTCCC 0.0480313	CCCGTCCC	0.0480313
CCCTGAGC 0.0480313	CCCTGAGC	0.0480313
GGAGGGAC 0.0480313	GGAGGGAC	0.0480313
GGCCCCCC 0.0480313	GGCCCCCC	0.0480313
GAGAGGGC 0.0480313	GAGAGGGC	0.0480313
CGCGCGGA 0.047752	CGCGCGGA	0.047752
CCCCCAAC 0.047752	CCCCCAAC	0.047752
CCCCGCAC 0.047752	CCCCGCAC	0.047752
AGCCCCCG 0.047752	AGCCCCCG	0.047752
AGGCGCAG 0.047752	AGGCGCAG	0.047752
GCGAGCCC 0.047752	GCGAGCCC	0.047752
GAGCCCCC 0.047752	GAGCCCCC	0.047752
CTCAGCTC 0.047752	CTCAGCTC	0.047752
CTCCCGGA 0.047752	CTCCCGGA	0.047752
CTCCTCAG 0.047752	CTCCTCAG	0.047752
CGGAGCTC 0.0474728	CGGAGCTC	0.0474728
CGCCGGCG 0.0474728	CGCCGGCG	0.0474728
AGAGGGGA 0.0474728	AGAGGGGA	0.0474728
CCCCTTTC 0.0474728	CCCCTTTC	0.0474728
AGCGCGCC 0.0474728	AGCGCGCC	0.0474728
AGCGGAGC 0.0474728	AGCGGAGC	0.0474728
GCCACGCC 0.0474728	GCCACGCC	0.0474728
CCCGCGGG 0.0474728	CCCGCGGG	0.0474728
CCCTCCAG 0.0474728	CCCTCCAG	0.0474728
GGAGACCC 0.0474728	GGAGACCC	0.0474728
GGCCCAGA 0.0474728	GGCCCAGA	0.0474728
CAGCGCCA 0.0474728	CAGCGCCA	0.0474728
GAAGCCGC 0.0474728	GAAGCCGC	0.0474728
AGGGGAGA 0.0474728	AGGGGAGA	0.0474728
CCTGGGTC 0.0474728	CCTGGGTC	0.0474728
TCCCAGCA 0.0471935	TCCCAGCA	0.0471935
CGCCTCCA 0.0471935	CGCCTCCA	0.0471935
CCCCCCAA 0.0471935	CCCCCCAA	0.0471935
CCGGGACG 0.0471935	CCGGGACG	0.0471935
GCGGTCCC 0.0471935	GCGGTCCC	0.0471935
GCTGCAGA 0.0471935	GCTGCAGA	0.0471935
GCTGCCCA 0.0471935	GCTGCCCA	0.0471935
GCCCCCCC 0.0471935	GCCCCCCC	0.0471935
GCGAGCGA 0.0471935	GCGAGCGA	0.0471935
CCCGCGTC 0.0471935	CCCGCGTC	0.0471935
CCGCAGAG 0.0471935	CCGCAGAG	0.0471935
GGAAGGAA 0.0471935	GGAAGGAA	0.0471935
GGAGGAAA 0.0471935	GGAGGAAA	0.0471935
GGCCCACC 0.0471935	GGCCCACC	0.0471935
CAGAGCAG 0.0471935	CAGAGCAG	0.0471935
CAGGGAAG 0.0471935	CAGGGAAG	0.0471935
CTCCTCGC 0.0471935	CTCCTCGC	0.0471935
CTCGCCTC 0.0471935	CTCGCCTC	0.0471935
AGGGGGTG 0.0471935	AGGGGGTG	0.0471935
CGCGGCGA 0.0469143	CGCGGCGA	0.0469143
CGGCCAGC 0.0469143	CGGCCAGC	0.0469143
GCACGCGC 0.0469143	GCACGCGC	0.0469143
GGGAGCCA 0.0469143	GGGAGCCA	0.0469143
CTGCTGCA 0.0469143	CTGCTGCA	0.0469143
CCGGGGTC 0.0469143	CCGGGGTC	0.0469143
AGCAGGAG 0.0469143	AGCAGGAG	0.0469143
GCGGGGAA 0.0469143	GCGGGGAA	0.0469143
GCTGGAGA 0.0469143	GCTGGAGA	0.0469143
GCCACAGC 0.0469143	GCCACAGC	0.0469143
CAGAGCCA 0.0469143	CAGAGCCA	0.0469143
AGGCTCCC 0.0469143	AGGCTCCC	0.0469143
CCTTCCCA 0.0469143	CCTTCCCA	0.0469143
AGAGAAAG 0.046635	AGAGAAAG	0.046635
AGAGGCCC 0.046635	AGAGGCCC	0.046635
AGCCGAGC 0.046635	AGCCGAGC	0.046635
AGCCTGGA 0.046635	AGCCTGGA	0.046635
ACCCCGGG 0.046635	ACCCCGGG	0.046635
AGCTCCTC 0.046635	AGCTCCTC	0.046635
GCGCTTCC 0.046635	GCGCTTCC	0.046635
CCCTTCTC 0.046635	CCCTTCTC	0.046635
GAGGCAGA 0.046635	GAGGCAGA	0.046635
AGACCACC 0.0463558	AGACCACC	0.0463558
CCATCCCC 0.0463558	CCATCCCC	0.0463558
CCCAGCAC 0.0463558	CCCAGCAC	0.0463558
AGCAGAGG 0.0463558	AGCAGAGG	0.0463558
AGCGAGGG 0.0463558	AGCGAGGG	0.0463558
CACACCCC 0.0463558	CACACCCC	0.0463558
CACCCCTC 0.0463558	CACCCCTC	0.0463558
GCCGGCCA 0.0463558	GCCGGCCA	0.0463558
GGAAGCCC 0.0463558	GGAAGCCC	0.0463558
CAGACCCC 0.0463558	CAGACCCC	0.0463558
CAGCGCAG 0.0463558	CAGCGCAG	0.0463558
CAGGAGGA 0.0463558	CAGGAGGA	0.0463558
GAGAGAGC 0.0463558	GAGAGAGC	0.0463558
GAGAGGAA 0.0463558	GAGAGGAA	0.0463558
ACGGCCGC 0.0463558	ACGGCCGC	0.0463558
AGGCTCTG 0.0463558	AGGCTCTG	0.0463558
AGGGCTCC 0.0463558	AGGGCTCC	0.0463558
CCTGGAGA 0.0463558	CCTGGAGA	0.0463558
ACTTCCGG 0.0463558	ACTTCCGG	0.0463558
AAAGGGAG 0.0463558	AAAGGGAG	0.0463558
CGGCGCCA 0.0460765	CGGCGCCA	0.0460765
GCAGCTGC 0.0460765	GCAGCTGC	0.0460765
GGGAGCGA 0.0460765	GGGAGCGA	0.0460765
CCAGGAAG 0.0460765	CCAGGAAG	0.0460765
CCCAGGAC 0.0460765	CCCAGGAC	0.0460765
AGCCGAGG 0.0460765	AGCCGAGG	0.0460765
AGCGAGGC 0.0460765	AGCGAGGC	0.0460765
ACCACACA 0.0460765	ACCACACA	0.0460765
ACCCCAGC 0.0460765	ACCCCAGC	0.0460765
ACCCCGGC 0.0460765	ACCCCGGC	0.0460765
ACCTCCCC 0.0460765	ACCTCCCC	0.0460765
CCAGAGGG 0.0460765	CCAGAGGG	0.0460765
CAGCTTCC 0.0460765	CAGCTTCC	0.0460765
TCCCCCCA 0.0457973	TCCCCCCA	0.0457973
CGCCAGCG 0.0457973	CGCCAGCG	0.0457973
AGAGAAGG 0.0457973	AGAGAAGG	0.0457973
AGAGGCTG 0.0457973	AGAGGCTG	0.0457973
CTGCCCAC 0.0457973	CTGCCCAC	0.0457973
CTGCTCTC 0.0457973	CTGCTCTC	0.0457973
CCCAGGCA 0.0457973	CCCAGGCA	0.0457973
CCCCACAC 0.0457973	CCCCACAC	0.0457973
CCCCAGCA 0.0457973	CCCCAGCA	0.0457973
CCTCAGGC 0.0457973	CCTCAGGC	0.0457973
CCTCGGAG 0.0457973	CCTCGGAG	0.0457973
AGCAGAGC 0.0457973	AGCAGAGC	0.0457973
GCCACCAC 0.0457973	GCCACCAC	0.0457973
GCCCTGGA 0.0457973	GCCCTGGA	0.0457973
CCGCTGGC 0.0457973	CCGCTGGC	0.0457973
CAGCCCAC 0.0457973	CAGCCCAC	0.0457973
CAGCTCGG 0.0457973	CAGCTCGG	0.0457973
CTCCCGCA 0.0457973	CTCCCGCA	0.0457973
CGGAGGGA 0.045518	CGGAGGGA	0.045518
CGGGCCCA 0.045518	CGGGCCCA	0.045518
CGCGCACG 0.045518	CGCGCACG	0.045518
AGAGGGGC 0.045518	AGAGGGGC	0.045518
CTTCCGGC 0.045518	CTTCCGGC	0.045518
CCCACAGC 0.045518	CCCACAGC	0.045518
CCCATCCC 0.045518	CCCATCCC	0.045518
CCGTCGCC 0.045518	CCGTCGCC	0.045518
AGCAGCGC 0.045518	AGCAGCGC	0.045518
AGCAGGCT 0.045518	AGCAGGCT	0.045518
AAGAAAAA 0.045518	AAGAAAAA	0.045518
AAGGAGCC 0.045518	AAGGAGCC	0.045518
AGCTGGCC 0.045518	AGCTGGCC	0.045518
AGGCCTCG 0.045518	AGGCCTCG	0.045518
GCGGGCCA 0.045518	GCGGGCCA	0.045518
GCGTGGCC 0.045518	GCGTGGCC	0.045518
ACAGCAGC 0.045518	ACAGCAGC	0.045518
CAGCAGAG 0.045518	CAGCAGAG	0.045518
CAGGAAGC 0.045518	CAGGAAGC	0.045518
GAGCCAGC 0.045518	GAGCCAGC	0.045518
ACGCGGCC 0.045518	ACGCGGCC	0.045518
AGGGCCCG 0.045518	AGGGCCCG	0.045518
TCCTCCCA 0.0452388	TCCTCCCA	0.0452388
CGGCCCGA 0.0452388	CGGCCCGA	0.0452388
CGCCCGGA 0.0452388	CGCCCGGA	0.0452388
GGGCCAGA 0.0452388	GGGCCAGA	0.0452388
CCAGCGGG 0.0452388	CCAGCGGG	0.0452388
GCCAGCCA 0.0452388	GCCAGCCA	0.0452388
GCCGAGGA 0.0452388	GCCGAGGA	0.0452388
CAGAGCCG 0.0452388	CAGAGCCG	0.0452388
CTCCCAGA 0.0452388	CTCCCAGA	0.0452388
CCTGGAAG 0.0452388	CCTGGAAG	0.0452388
CGCTCTGC 0.0449595	CGCTCTGC	0.0449595
CGGCAGGC 0.0449595	CGGCAGGC	0.0449595
CGGGACGC 0.0449595	CGGGACGC	0.0449595
GCACACAC 0.0449595	GCACACAC	0.0449595
AGAGAGGA 0.0449595	AGAGAGGA	0.0449595
CCGGTCCC 0.0449595	CCGGTCCC	0.0449595
ACCCCCCA 0.0449595	ACCCCCCA	0.0449595
AGCTGCTC 0.0449595	AGCTGCTC	0.0449595
AGGCCACC 0.0449595	AGGCCACC	0.0449595
GCCAGGCA 0.0449595	GCCAGGCA	0.0449595
GCGCCCAC 0.0449595	GCGCCCAC	0.0449595
CCCGGACC 0.0449595	CCCGGACC	0.0449595
CAGAGAGG 0.0449595	CAGAGAGG	0.0449595
GAGGAGCA 0.0449595	GAGGAGCA	0.0449595
CTCAGGGC 0.0449595	CTCAGGGC	0.0449595
CGGCTGCA 0.0446803	CGGCTGCA	0.0446803
CGGGCCGA 0.0446803	CGGGCCGA	0.0446803
AAGGGGAG 0.0446803	AAGGGGAG	0.0446803
AGAGGGGG 0.0446803	AGAGGGGG	0.0446803
GGGCCCCA 0.0446803	GGGCCCCA	0.0446803
AAAGAAAA 0.0446803	AAAGAAAA	0.0446803
CCAGGGGC 0.0446803	CCAGGGGC	0.0446803
CCCCCCAG 0.0446803	CCCCCCAG	0.0446803
CCGGTGGC 0.0446803	CCGGTGGC	0.0446803
CACCCGCG 0.0446803	CACCCGCG	0.0446803
AGGAGAGA 0.0446803	AGGAGAGA	0.0446803
AGGCAGGA 0.0446803	AGGCAGGA	0.0446803
AGGCGCCC 0.0446803	AGGCGCCC	0.0446803
GCTTCCCC 0.0446803	GCTTCCCC	0.0446803
GCTTTCCC 0.0446803	GCTTTCCC	0.0446803
GCCCGCAC 0.0446803	GCCCGCAC	0.0446803
CCCTCACC 0.0446803	CCCTCACC	0.0446803
CCCTGGCG 0.0446803	CCCTGGCG	0.0446803
CCGGAAGC 0.0446803	CCGGAAGC	0.0446803
GGAGCAGA 0.0446803	GGAGCAGA	0.0446803
GGCGTCCC 0.0446803	GGCGTCCC	0.0446803
GAGGAGAA 0.0446803	GAGGAGAA	0.0446803
GAGGTGGC 0.0446803	GAGGTGGC	0.0446803
AGGGCGAG 0.0446803	AGGGCGAG	0.0446803
CGGCGACC 0.044401	CGGCGACC	0.044401
AGAGCGCG 0.044401	AGAGCGCG	0.044401
CCCACGGC 0.044401	CCCACGGC	0.044401
CCGGAGAG 0.044401	CCGGAGAG	0.044401
AGCGGGCC 0.044401	AGCGGGCC	0.044401
AGCTCTGC 0.044401	AGCTCTGC	0.044401
AGGAAGGA 0.044401	AGGAAGGA	0.044401
GCCTGGAA 0.044401	GCCTGGAA	0.044401
CCGCACGC 0.044401	CCGCACGC	0.044401
GGAAGGCC 0.044401	GGAAGGCC	0.044401
CAGCTCTC 0.044401	CAGCTCTC	0.044401
AGGGAAAG 0.044401	AGGGAAAG	0.044401
GCAGCCCA 0.0441218	GCAGCCCA	0.0441218
CCATGGCG 0.0441218	CCATGGCG	0.0441218
CCGGCTTC 0.0441218	CCGGCTTC	0.0441218
CCTCACCC 0.0441218	CCTCACCC	0.0441218
CCTCTCCA 0.0441218	CCTCTCCA	0.0441218
AGCAGGCG 0.0441218	AGCAGGCG	0.0441218
CACACAGC 0.0441218	CACACAGC	0.0441218
CACCACCC 0.0441218	CACCACCC	0.0441218
ACCCCGCG 0.0441218	ACCCCGCG	0.0441218
ACCGCGGG 0.0441218	ACCGCGGG	0.0441218
AGGAAGCC 0.0441218	AGGAAGCC	0.0441218
AGGCTCAG 0.0441218	AGGCTCAG	0.0441218
GCGCGTCC 0.0441218	GCGCGTCC	0.0441218
GGCAGAGA 0.0441218	GGCAGAGA	0.0441218
GGCCGCAC 0.0441218	GGCCGCAC	0.0441218
GGCGAGGA 0.0441218	GGCGAGGA	0.0441218
AGGGCGGA 0.0441218	AGGGCGGA	0.0441218
CCTGCCCA 0.0441218	CCTGCCCA	0.0441218
CCTTTCTC 0.0441218	CCTTTCTC	0.0441218
GCAGCAGA 0.0438425	GCAGCAGA	0.0438425
GCAGGGGA 0.0438425	GCAGGGGA	0.0438425
GGGGAAGA 0.0438425	GGGGAAGA	0.0438425
CCCCATCC 0.0438425	CCCCATCC	0.0438425
CCCCCACG 0.0438425	CCCCCACG	0.0438425
AGCAGCTC 0.0438425	AGCAGCTC	0.0438425
ACCCGCGC 0.0438425	ACCCGCGC	0.0438425
ACCCGGCG 0.0438425	ACCCGGCG	0.0438425
AGGAGGCA 0.0438425	AGGAGGCA	0.0438425
CCACTTCC 0.0438425	CCACTTCC	0.0438425
GCCCTGCA 0.0438425	GCCCTGCA	0.0438425
CCCGCGCA 0.0438425	CCCGCGCA	0.0438425
CCGCAGCA 0.0438425	CCGCAGCA	0.0438425
GAAGAGGA 0.0438425	GAAGAGGA	0.0438425
AGGGCGCC 0.0438425	AGGGCGCC	0.0438425
CCTTCCAG 0.0438425	CCTTCCAG	0.0438425
CGGGGCCA 0.0435633	CGGGGCCA	0.0435633
CGGGGTCC 0.0435633	CGGGGTCC	0.0435633
CGCACGCG 0.0435633	CGCACGCG	0.0435633
CGCGCCCA 0.0435633	CGCGCCCA	0.0435633
AGAGCCAG 0.0435633	AGAGCCAG	0.0435633
GGGCGGCA 0.0435633	GGGCGGCA	0.0435633
CCAGGGGG 0.0435633	CCAGGGGG	0.0435633
CCAGTCCC 0.0435633	CCAGTCCC	0.0435633
CCCAGTCC 0.0435633	CCCAGTCC	0.0435633
CCCCTCAG 0.0435633	CCCCTCAG	0.0435633
AGCCGCCA 0.0435633	AGCCGCCA	0.0435633
ACCCAGCC 0.0435633	ACCCAGCC	0.0435633
AAGGCGGC 0.0435633	AAGGCGGC	0.0435633
AGGAGAAG 0.0435633	AGGAGAAG	0.0435633
CCAGCCAC 0.0435633	CCAGCCAC	0.0435633
GCTGCCAC 0.0435633	GCTGCCAC	0.0435633
CCGAGAGC 0.0435633	CCGAGAGC	0.0435633
CCGCCGGA 0.0435633	CCGCCGGA	0.0435633
GGAGCTGA 0.0435633	GGAGCTGA	0.0435633
CAGCGGAG 0.0435633	CAGCGGAG	0.0435633
ACGCCCCC 0.0435633	ACGCCCCC	0.0435633
CTCACCTC 0.0435633	CTCACCTC	0.0435633
CCTGCCAG 0.0435633	CCTGCCAG	0.0435633
CGGCTCCA 0.043284	CGGCTCCA	0.043284
AGAGAGGC 0.043284	AGAGAGGC	0.043284
AGAGCAGC 0.043284	AGAGCAGC	0.043284
AGAGGAGC 0.043284	AGAGGAGC	0.043284
CCGGGGGA 0.043284	CCGGGGGA	0.043284
AGCGCCTG 0.043284	AGCGCCTG	0.043284
ACCCGGAG 0.043284	ACCCGGAG	0.043284
AGGCCCCA 0.043284	AGGCCCCA	0.043284
GCCCGACC 0.043284	GCCCGACC	0.043284
CCGCTCTC 0.043284	CCGCTCTC	0.043284
CAGAAGCC 0.043284	CAGAAGCC	0.043284
CAGAGGGA 0.043284	CAGAGGGA	0.043284
CTCCAGCA 0.043284	CTCCAGCA	0.043284
CGCTCCAG 0.0430047	CGCTCCAG	0.0430047
CGGCCGGA 0.0430047	CGGCCGGA	0.0430047
CGAGCTCC 0.0430047	CGAGCTCC	0.0430047
CGCCGCGA 0.0430047	CGCCGCGA	0.0430047
GGGGGAAA 0.0430047	GGGGGAAA	0.0430047
CTGCTCGC 0.0430047	CTGCTCGC	0.0430047
AAAAAAAT 0.0430047	AAAAAAAT	0.0430047
CCAGCGCG 0.0430047	CCAGCGCG	0.0430047
CACCAGGC 0.0430047	CACCAGGC	0.0430047
CACCCCGG 0.0430047	CACCCCGG	0.0430047
AGGCCCCC 0.0430047	AGGCCCCC	0.0430047
CCGACGCC 0.0430047	CCGACGCC	0.0430047
CCGCGGCA 0.0430047	CCGCGGCA	0.0430047
CAGGGCCA 0.0430047	CAGGGCCA	0.0430047
GAGAAGGC 0.0430047	GAGAAGGC	0.0430047
CTTTCCTC 0.0430047	CTTTCCTC	0.0430047
CTCCTGGA 0.0430047	CTCCTGGA	0.0430047
CGGCTCTC 0.0427255	CGGCTCTC	0.0427255
AAGGGGGA 0.0427255	AAGGGGGA	0.0427255
CGCGAGCG 0.0427255	CGCGAGCG	0.0427255
AGAGCAGG 0.0427255	AGAGCAGG	0.0427255
CTGGGCCA 0.0427255	CTGGGCCA	0.0427255
GAAGGGGA 0.0427255	GAAGGGGA	0.0427255
CCAGGGCA 0.0427255	CCAGGGCA	0.0427255
CCCACCAG 0.0427255	CCCACCAG	0.0427255
AGCCTCGG 0.0427255	AGCCTCGG	0.0427255
CAAGGCCC 0.0427255	CAAGGCCC	0.0427255
ACCCCACC 0.0427255	ACCCCACC	0.0427255
ACCCCCGC 0.0427255	ACCCCCGC	0.0427255
CACCGGCC 0.0427255	CACCGGCC	0.0427255
AAGCAGGG 0.0427255	AAGCAGGG	0.0427255
GCTGGCCA 0.0427255	GCTGGCCA	0.0427255
GCCTCCAC 0.0427255	GCCTCCAC	0.0427255
CCCGGAAG 0.0427255	CCCGGAAG	0.0427255
GGAGGCGA 0.0427255	GGAGGCGA	0.0427255
GGCAGGCA 0.0427255	GGCAGGCA	0.0427255
GGCCCCGA 0.0427255	GGCCCCGA	0.0427255
CAGAGCTC 0.0427255	CAGAGCTC	0.0427255
CAGAGGAG 0.0427255	CAGAGGAG	0.0427255
GAGCAGGA 0.0427255	GAGCAGGA	0.0427255
CTTCTCTC 0.0427255	CTTCTCTC	0.0427255
AGGGGGAA 0.0427255	AGGGGGAA	0.0427255
AGGGGGGC 0.0427255	AGGGGGGC	0.0427255
CGGCCCAC 0.0424462	CGGCCCAC	0.0424462
GCAGAGGA 0.0424462	GCAGAGGA	0.0424462
CGCAGGGA 0.0424462	CGCAGGGA	0.0424462
CCTCCTCA 0.0424462	CCTCCTCA	0.0424462
AGCCCCCA 0.0424462	AGCCCCCA	0.0424462
AAGCCAGG 0.0424462	AAGCCAGG	0.0424462
AAGCCTGG 0.0424462	AAGCCTGG	0.0424462
CCAACCCC 0.0424462	CCAACCCC	0.0424462
CCAAGCCC 0.0424462	CCAAGCCC	0.0424462
CCCTCGCG 0.0424462	CCCTCGCG	0.0424462
GGAGAGAA 0.0424462	GGAGAGAA	0.0424462
CAGAGAGC 0.0424462	CAGAGAGC	0.0424462
GAGCCCCA 0.0424462	GAGCCCCA	0.0424462
AGGGGGGG 0.0424462	AGGGGGGG	0.0424462
CGCGCCAC 0.042167	CGCGCCAC	0.042167
GGCTGCCA 0.042167	GGCTGCCA	0.042167
GGGGCGCA 0.042167	GGGGCGCA	0.042167
GGGGTGGA 0.042167	GGGGTGGA	0.042167
AAAAGAAA 0.042167	AAAAGAAA	0.042167
GACCTCCC 0.042167	GACCTCCC	0.042167
CCCAAGCC 0.042167	CCCAAGCC	0.042167
CCCCCACA 0.042167	CCCCCACA	0.042167
AGCGCAGG 0.042167	AGCGCAGG	0.042167
ACCCCCTC 0.042167	ACCCCCTC	0.042167
CACAGCTG 0.042167	CACAGCTG	0.042167
CACAGGCC 0.042167	CACAGGCC	0.042167
AAGGAGGA 0.042167	AAGGAGGA	0.042167
CTCTGGGA 0.042167	CTCTGGGA	0.042167
CCTGGGAC 0.042167	CCTGGGAC	0.042167
CCTGGGCA 0.042167	CCTGGGCA	0.042167
CCTGTCCC 0.042167	CCTGTCCC	0.042167
AAAGGGGG 0.042167	AAAGGGGG	0.042167
GGGCGCCA 0.0418877	GGGCGCCA	0.0418877
AGCGGGGG 0.0418877	AGCGGGGG	0.0418877
ACCCTGGG 0.0418877	ACCCTGGG	0.0418877
AGCTCCTG 0.0418877	AGCTCCTG	0.0418877
AGGAAAAG 0.0418877	AGGAAAAG	0.0418877
CCACCAGG 0.0418877	CCACCAGG	0.0418877
GCCGCGCA 0.0418877	GCCGCGCA	0.0418877
CAGCAGGA 0.0418877	CAGCAGGA	0.0418877
AGGCTGCA 0.0418877	AGGCTGCA	0.0418877
AGGCTGGA 0.0418877	AGGCTGGA	0.0418877
CGCGGTCC 0.0416085	CGCGGTCC	0.0416085
CGGGCCAC 0.0416085	CGGGCCAC	0.0416085
CGGGGCGA 0.0416085	CGGGGCGA	0.0416085
CGAGCAGC 0.0416085	CGAGCAGC	0.0416085
GGGGCCCA 0.0416085	GGGGCCCA	0.0416085
GGGGCCGA 0.0416085	GGGGCCGA	0.0416085
CTGCCAGC 0.0416085	CTGCCAGC	0.0416085
CTGCGAGC 0.0416085	CTGCGAGC	0.0416085
CTTCCCCA 0.0416085	CTTCCCCA	0.0416085
CGTCCCGC 0.0416085	CGTCCCGC	0.0416085
GACCCGCC 0.0416085	GACCCGCC	0.0416085
CCCACAGG 0.0416085	CCCACAGG	0.0416085
CCTCTGCG 0.0416085	CCTCTGCG	0.0416085
AGCGGGGA 0.0416085	AGCGGGGA	0.0416085
CACCAGCC 0.0416085	CACCAGCC	0.0416085
AGCTCAGC 0.0416085	AGCTCAGC	0.0416085
AGCTCTGG 0.0416085	AGCTCTGG	0.0416085
AGCTGGGA 0.0416085	AGCTGGGA	0.0416085
CCACACAG 0.0416085	CCACACAG	0.0416085
CCACGCCG 0.0416085	CCACGCCG	0.0416085
GCCTGGCA 0.0416085	GCCTGGCA	0.0416085
GGCCGAGA 0.0416085	GGCCGAGA	0.0416085
CAGGCCAC 0.0416085	CAGGCCAC	0.0416085
GAGGCCCA 0.0416085	GAGGCCCA	0.0416085
GAAGGAGC 0.0416085	GAAGGAGC	0.0416085
CTCCTCAC 0.0416085	CTCCTCAC	0.0416085
CTCGGGGA 0.0416085	CTCGGGGA	0.0416085
CGCACCCC 0.0413292	CGCACCCC	0.0413292
CGCCCCGA 0.0413292	CGCCCCGA	0.0413292
CTGCCCCA 0.0413292	CTGCCCCA	0.0413292
CGTCCTCC 0.0413292	CGTCCTCC	0.0413292
CCCAGAAG 0.0413292	CCCAGAAG	0.0413292
CCCCAAGG 0.0413292	CCCCAAGG	0.0413292
CCCCACCA 0.0413292	CCCCACCA	0.0413292
AGCCCCGA 0.0413292	AGCCCCGA	0.0413292
CACCCCAG 0.0413292	CACCCCAG	0.0413292
CACCCCCG 0.0413292	CACCCCCG	0.0413292
CACCGCCA 0.0413292	CACCGCCA	0.0413292
AAGAGGAG 0.0413292	AAGAGGAG	0.0413292
ACCCGGGG 0.0413292	ACCCGGGG	0.0413292
AGCTGAGG 0.0413292	AGCTGAGG	0.0413292
AGGAAGCG 0.0413292	AGGAAGCG	0.0413292
GCTCCACC 0.0413292	GCTCCACC	0.0413292
GCTGTCCC 0.0413292	GCTGTCCC	0.0413292
GCGCCCCA 0.0413292	GCGCCCCA	0.0413292
CAGGGGGA 0.0413292	CAGGGGGA	0.0413292
ACGCCGGG 0.0413292	ACGCCGGG	0.0413292
CTCTGCGC 0.0413292	CTCTGCGC	0.0413292
AGGCTGCC 0.0413292	AGGCTGCC	0.0413292
AGAAGGAG 0.0413292	AGAAGGAG	0.0413292
CGGGAGCA 0.04105	CGGGAGCA	0.04105
GCACGGCC 0.04105	GCACGGCC	0.04105
CGCGCACC 0.04105	CGCGCACC	0.04105
AGAGAGAA 0.04105	AGAGAGAA	0.04105
GGTCCCCA 0.04105	GGTCCCCA	0.04105
CAGTCCCC 0.04105	CAGTCCCC	0.04105
CTGGGAGA 0.04105	CTGGGAGA	0.04105
CCAGGGAC 0.04105	CCAGGGAC	0.04105
AGCCCGGA 0.04105	AGCCCGGA	0.04105
CAAGCCCC 0.04105	CAAGCCCC	0.04105
AGGAGAGC 0.04105	AGGAGAGC	0.04105
GCTGGGCA 0.04105	GCTGGGCA	0.04105
GCGCCCGA 0.04105	GCGCCCGA	0.04105
ACAGCCCC 0.04105	ACAGCCCC	0.04105
ACAGCTGC 0.04105	ACAGCTGC	0.04105
GGAGCCGA 0.04105	GGAGCCGA	0.04105
GGCAGGAA 0.04105	GGCAGGAA	0.04105
CAGCCTCG 0.04105	CAGCCTCG	0.04105
CTTCTTCC 0.04105	CTTCTTCC	0.04105
AGGGGGGA 0.04105	AGGGGGGA	0.04105
CCTTTTCC 0.04105	CCTTTTCC	0.04105
CGGCCTTC 0.0407707	CGGCCTTC	0.0407707
CGAGGGCC 0.0407707	CGAGGGCC	0.0407707
GGGCGGAA 0.0407707	GGGCGGAA	0.0407707
GGGGCTGA 0.0407707	GGGGCTGA	0.0407707
CCAGGACC 0.0407707	CCAGGACC	0.0407707
CCGGGAAC 0.0407707	CCGGGAAC	0.0407707
AGCCCAGA 0.0407707	AGCCCAGA	0.0407707
AGCTCGGG 0.0407707	AGCTCGGG	0.0407707
AGGAAAGG 0.0407707	AGGAAAGG	0.0407707
AGGCCGGA 0.0407707	AGGCCGGA	0.0407707
GCTGAGGA 0.0407707	GCTGAGGA	0.0407707
GCTGCTGA 0.0407707	GCTGCTGA	0.0407707
GCCGCACC 0.0407707	GCCGCACC	0.0407707
CCCGGTGC 0.0407707	CCCGGTGC	0.0407707
GGACTCCC 0.0407707	GGACTCCC	0.0407707
GGCGACCC 0.0407707	GGCGACCC	0.0407707
CAGAGAGA 0.0407707	CAGAGAGA	0.0407707
GAGAAGGA 0.0407707	GAGAAGGA	0.0407707
GAGGACGC 0.0407707	GAGGACGC	0.0407707
GAGGGAAA 0.0407707	GAGGGAAA	0.0407707
AGGGCCCC 0.0407707	AGGGCCCC	0.0407707
CGCGGGAC 0.0404915	CGCGGGAC	0.0404915
CGCGGTGC 0.0404915	CGCGGTGC	0.0404915
CGGAGAGC 0.0404915	CGGAGAGC	0.0404915
CGGCGACG 0.0404915	CGGCGACG	0.0404915
GCACCGGC 0.0404915	GCACCGGC	0.0404915
CGGTGGGC 0.0404915	CGGTGGGC	0.0404915
GAAGGGGC 0.0404915	GAAGGGGC	0.0404915
CCCAAGGC 0.0404915	CCCAAGGC	0.0404915
CCCCCAAG 0.0404915	CCCCCAAG	0.0404915
CCCCCGCA 0.0404915	CCCCCGCA	0.0404915
AAGGAGGC 0.0404915	AAGGAGGC	0.0404915
ACCGCCCC 0.0404915	ACCGCCCC	0.0404915
AGGAGCGC 0.0404915	AGGAGCGC	0.0404915
GCCCACGC 0.0404915	GCCCACGC	0.0404915
CCCGGTCC 0.0404915	CCCGGTCC	0.0404915
ACAGCGGC 0.0404915	ACAGCGGC	0.0404915
GGCCCTGA 0.0404915	GGCCCTGA	0.0404915
GAGAAGCC 0.0404915	GAGAAGCC	0.0404915
CTTGGGGC 0.0404915	CTTGGGGC	0.0404915
CTCGCTGC 0.0404915	CTCGCTGC	0.0404915
GCAGTGGC 0.0402122	GCAGTGGC	0.0402122
CGCACGCC 0.0402122	CGCACGCC	0.0402122
CGCGCGAG 0.0402122	CGCGCGAG	0.0402122
CTGCCTTC 0.0402122	CTGCCTTC	0.0402122
CCCCCATC 0.0402122	CCCCCATC	0.0402122
AGCCCCAC 0.0402122	AGCCCCAC	0.0402122
AGCCTCTG 0.0402122	AGCCTCTG	0.0402122
AGGCCCGA 0.0402122	AGGCCCGA	0.0402122
CCACGGCG 0.0402122	CCACGGCG	0.0402122
GCGGACGC 0.0402122	GCGGACGC	0.0402122
GCCGGAGA 0.0402122	GCCGGAGA	0.0402122
GCGAGAGC 0.0402122	GCGAGAGC	0.0402122
GCGCAGCA 0.0402122	GCGCAGCA	0.0402122
CCCGCGGA 0.0402122	CCCGCGGA	0.0402122
CCGAGCAG 0.0402122	CCGAGCAG	0.0402122
GGCCACCA 0.0402122	GGCCACCA	0.0402122
CAGCACCA 0.0402122	CAGCACCA	0.0402122
CTCGCAGC 0.0402122	CTCGCAGC	0.0402122
AACCAGGC 0.0402122	AACCAGGC	0.0402122
CGGGCGCA 0.039933	CGGGCGCA	0.039933
CGCCGCAC 0.039933	CGCCGCAC	0.039933
GGGAGGAC 0.039933	GGGAGGAC	0.039933
CCAGCTCG 0.039933	CCAGCTCG	0.039933
AGCAGCCA 0.039933	AGCAGCCA	0.039933
CACCGGGC 0.039933	CACCGGGC	0.039933
CACGGCCG 0.039933	CACGGCCG	0.039933
ACCGCGCC 0.039933	ACCGCGCC	0.039933
AGCTCGGC 0.039933	AGCTCGGC	0.039933
AGGAGGTG 0.039933	AGGAGGTG	0.039933
GCTCTGCA 0.039933	GCTCTGCA	0.039933
GCTGGGAC 0.039933	GCTGGGAC	0.039933
GGAAAAAA 0.039933	GGAAAAAA	0.039933
GCCTCACC 0.039933	GCCTCACC	0.039933
CAGCCGAG 0.039933	CAGCCGAG	0.039933
GAGGGCCC 0.039933	GAGGGCCC	0.039933
CTTTCTCC 0.039933	CTTTCTCC	0.039933
CTCCTGCA 0.039933	CTCCTGCA	0.039933
AGGGAAGC 0.039933	AGGGAAGC	0.039933
CCTGGCCA 0.039933	CCTGGCCA	0.039933
CGGAAGCC 0.0396537	CGGAAGCC	0.0396537
AGAGCCCA 0.0396537	AGAGCCCA	0.0396537
CTGGCTTC 0.0396537	CTGGCTTC	0.0396537
CTGGGAAA 0.0396537	CTGGGAAA	0.0396537
CCAGGGTC 0.0396537	CCAGGGTC	0.0396537
CCCACACC 0.0396537	CCCACACC	0.0396537
CCCAGGTC 0.0396537	CCCAGGTC	0.0396537
CCCCCGAG 0.0396537	CCCCCGAG	0.0396537
CCGGCGTC 0.0396537	CCGGCGTC	0.0396537
AGCCTGCG 0.0396537	AGCCTGCG	0.0396537
AGCGGCCT 0.0396537	AGCGGCCT	0.0396537
AAGGAGAG 0.0396537	AAGGAGAG	0.0396537
GCGCGCCA 0.0396537	GCGCGCCA	0.0396537
GCCCAGAC 0.0396537	GCCCAGAC	0.0396537
GCCCGCGA 0.0396537	GCCCGCGA	0.0396537
GCCGCAGA 0.0396537	GCCGCAGA	0.0396537
CCGAGAGG 0.0396537	CCGAGAGG	0.0396537
CAGAGCGC 0.0396537	CAGAGCGC	0.0396537
CAGCTCAG 0.0396537	CAGCTCAG	0.0396537
GAGAGAAA 0.0396537	GAGAGAAA	0.0396537
CTCAGCGC 0.0396537	CTCAGCGC	0.0396537
ACTGCAGC 0.0396537	ACTGCAGC	0.0396537
AGAAAGGA 0.0396537	AGAAAGGA	0.0396537
AGAAGCAG 0.0396537	AGAAGCAG	0.0396537
CGCTCAGC 0.0393745	CGCTCAGC	0.0393745
CGGAGCCA 0.0393745	CGGAGCCA	0.0393745
CGGCAGCA 0.0393745	CGGCAGCA	0.0393745
CGAGCTGC 0.0393745	CGAGCTGC	0.0393745
AGAGCCGC 0.0393745	AGAGCCGC	0.0393745
GGCTGCAC 0.0393745	GGCTGCAC	0.0393745
GGGCGCCC 0.0393745	GGGCGCCC	0.0393745
CTGAGCTC 0.0393745	CTGAGCTC	0.0393745
CCCCGTCC 0.0393745	CCCCGTCC	0.0393745
CCCCTCAC 0.0393745	CCCCTCAC	0.0393745
CCGGCGAG 0.0393745	CCGGCGAG	0.0393745
CCGGGGAA 0.0393745	CCGGGGAA	0.0393745
CCTCTCGC 0.0393745	CCTCTCGC	0.0393745
AGCCGCCT 0.0393745	AGCCGCCT	0.0393745
AGCGAGAG 0.0393745	AGCGAGAG	0.0393745
ACCCACCC 0.0393745	ACCCACCC	0.0393745
CACCCTGC 0.0393745	CACCCTGC	0.0393745
AGCTGGCG 0.0393745	AGCTGGCG	0.0393745
AGGCGAGG 0.0393745	AGGCGAGG	0.0393745
CCACTGCC 0.0393745	CCACTGCC	0.0393745
GCCCCTCA 0.0393745	GCCCCTCA	0.0393745
CCCTCTTC 0.0393745	CCCTCTTC	0.0393745
CCGCGACC 0.0393745	CCGCGACC	0.0393745
GGCCCCCA 0.0393745	GGCCCCCA	0.0393745
CAGAGGCG 0.0393745	CAGAGGCG	0.0393745
CAGGCCTG 0.0393745	CAGGCCTG	0.0393745
CTCTCCCA 0.0393745	CTCTCCCA	0.0393745
CTCTCGGC 0.0393745	CTCTCGGC	0.0393745
CGCGCGTC 0.0390952	CGCGCGTC	0.0390952
CGCGGGTC 0.0390952	CGCGGGTC	0.0390952
CGGGACCG 0.0390952	CGGGACCG	0.0390952
GCAGCACC 0.0390952	GCAGCACC	0.0390952
CGAGGGGA 0.0390952	CGAGGGGA	0.0390952
CGCGCCAG 0.0390952	CGCGCCAG	0.0390952
AGTCCCGG 0.0390952	AGTCCCGG	0.0390952
AGAGACAG 0.0390952	AGAGACAG	0.0390952
GGGGCCCC 0.0390952	GGGGCCCC	0.0390952
CTGCTCCA 0.0390952	CTGCTCCA	0.0390952
CCCCACGG 0.0390952	CCCCACGG	0.0390952
CCGTCTCC 0.0390952	CCGTCTCC	0.0390952
CCTCTGCA 0.0390952	CCTCTGCA	0.0390952
AGCCAGGA 0.0390952	AGCCAGGA	0.0390952
AGCCCCCC 0.0390952	AGCCCCCC	0.0390952
CACGCGCG 0.0390952	CACGCGCG	0.0390952
CACTCCCC 0.0390952	CACTCCCC	0.0390952
AAGGCAGG 0.0390952	AAGGCAGG	0.0390952
ACCCGCGG 0.0390952	ACCCGCGG	0.0390952
AGGAAGGC 0.0390952	AGGAAGGC	0.0390952
CCACCGGC 0.0390952	CCACCGGC	0.0390952
GCCCGGCA 0.0390952	GCCCGGCA	0.0390952
CCCGGAGA 0.0390952	CCCGGAGA	0.0390952
CCGCCACG 0.0390952	CCGCCACG	0.0390952
GGAAGAGA 0.0390952	GGAAGAGA	0.0390952
GGAAGTGA 0.0390952	GGAAGTGA	0.0390952
GAAGCAGC 0.0390952	GAAGCAGC	0.0390952
CCTTGGCC 0.0390952	CCTTGGCC	0.0390952
CGGCGCGA 0.038816	CGGCGCGA	0.038816
CTGGGAAC 0.038816	CTGGGAAC	0.038816
CTGGTGGC 0.038816	CTGGTGGC	0.038816
CTTCCAGA 0.038816	CTTCCAGA	0.038816
CGGTCGCC 0.038816	CGGTCGCC	0.038816
CGGTCTCC 0.038816	CGGTCTCC	0.038816
CCGGGGCA 0.038816	CCGGGGCA	0.038816
AGCCACCC 0.038816	AGCCACCC	0.038816
ACCTCCCA 0.038816	ACCTCCCA	0.038816
AGCTCCCC 0.038816	AGCTCCCC	0.038816
GCGGAAGC 0.038816	GCGGAAGC	0.038816
GCCGCGAC 0.038816	GCCGCGAC	0.038816
GCCGTCGC 0.038816	GCCGTCGC	0.038816
GTCCCCAC 0.038816	GTCCCCAC	0.038816
GGAAGCCA 0.038816	GGAAGCCA	0.038816
CAGCCTCA 0.038816	CAGCCTCA	0.038816
CAGGCTCA 0.038816	CAGGCTCA	0.038816
CAGGGGCC 0.038816	CAGGGGCC	0.038816
GAGCTGCA 0.038816	GAGCTGCA	0.038816
GAGGAGAC 0.038816	GAGGAGAC	0.038816
AGGCTGTG 0.038816	AGGCTGTG	0.038816
AGGTGAGG 0.038816	AGGTGAGG	0.038816
AGGTGGGC 0.038816	AGGTGGGC	0.038816
CGCTGAGC 0.0385367	CGCTGAGC	0.0385367
CGCTGTCC 0.0385367	CGCTGTCC	0.0385367
CGGGGAGA 0.0385367	CGGGGAGA	0.0385367
GCAGCGGA 0.0385367	GCAGCGGA	0.0385367
GCAGGGAC 0.0385367	GCAGGGAC	0.0385367
AGAGCCCC 0.0385367	AGAGCCCC	0.0385367
AGAGCGGC 0.0385367	AGAGCGGC	0.0385367
AGAGCGGG 0.0385367	AGAGCGGG	0.0385367
GGCTCCAC 0.0385367	GGCTCCAC	0.0385367
CTGGAGAA 0.0385367	CTGGAGAA	0.0385367
CTGTGCTC 0.0385367	CTGTGCTC	0.0385367
CCCCAAGC 0.0385367	CCCCAAGC	0.0385367
CCCCCCCG 0.0385367	CCCCCCCG	0.0385367
AGCCTGCC 0.0385367	AGCCTGCC	0.0385367
CAAGATGG 0.0385367	CAAGATGG	0.0385367
AAGCCCAG 0.0385367	AAGCCCAG	0.0385367
AAGCCGGG 0.0385367	AAGCCGGG	0.0385367
AAGGAAGG 0.0385367	AAGGAAGG	0.0385367
AAGGCCGC 0.0385367	AAGGCCGC	0.0385367
AGCTGCCT 0.0385367	AGCTGCCT	0.0385367
GCGGTGCC 0.0385367	GCGGTGCC	0.0385367
GCTCCGGA 0.0385367	GCTCCGGA	0.0385367
GCTCTGGA 0.0385367	GCTCTGGA	0.0385367
GCCCGGAC 0.0385367	GCCCGGAC	0.0385367
CCGCAGGA 0.0385367	CCGCAGGA	0.0385367
CCGGACCC 0.0385367	CCGGACCC	0.0385367
CAGCTGGA 0.0385367	CAGCTGGA	0.0385367
GAGCGAGA 0.0385367	GAGCGAGA	0.0385367
GAGGAAAA 0.0385367	GAGGAAAA	0.0385367
CTCACCCC 0.0385367	CTCACCCC	0.0385367
CTCTCTTC 0.0385367	CTCTCTTC	0.0385367
CCTTCCGC 0.0385367	CCTTCCGC	0.0385367
AAGGGGCG 0.0382575	AAGGGGCG	0.0382575
AGAGCGCC 0.0382575	AGAGCGCC	0.0382575
GGGCCCGA 0.0382575	GGGCCCGA	0.0382575
CTGGGACC 0.0382575	CTGGGACC	0.0382575
CCATGGCC 0.0382575	CCATGGCC	0.0382575
CCCCACAG 0.0382575	CCCCACAG	0.0382575
AGCCTCCT 0.0382575	AGCCTCCT	0.0382575
AGCGGCTC 0.0382575	AGCGGCTC	0.0382575
CAACCCCC 0.0382575	CAACCCCC	0.0382575
CACAGGGC 0.0382575	CACAGGGC	0.0382575
CCACAGGC 0.0382575	CCACAGGC	0.0382575
CCACCGGG 0.0382575	CCACCGGG	0.0382575
CCAGAGAG 0.0382575	CCAGAGAG	0.0382575
GCGCCGGA 0.0382575	GCGCCGGA	0.0382575
CCCTGTGC 0.0382575	CCCTGTGC	0.0382575
CAGAGCGG 0.0382575	CAGAGCGG	0.0382575
CAGCCAGA 0.0382575	CAGCCAGA	0.0382575
CAGCTGCG 0.0382575	CAGCTGCG	0.0382575
CAGGCAGA 0.0382575	CAGGCAGA	0.0382575
CAGGCGCA 0.0382575	CAGGCGCA	0.0382575
CAGGGAGA 0.0382575	CAGGGAGA	0.0382575
GAGCCAGA 0.0382575	GAGCCAGA	0.0382575
GAGCCCAC 0.0382575	GAGCCCAC	0.0382575
GAGCTCCC 0.0382575	GAGCTCCC	0.0382575
CTTTTCCC 0.0382575	CTTTTCCC	0.0382575
CTCCATCC 0.0382575	CTCCATCC	0.0382575
CTCTGAGC 0.0382575	CTCTGAGC	0.0382575
TCCCGCCA 0.0379782	TCCCGCCA	0.0379782
CGGCTGGA 0.0379782	CGGCTGGA	0.0379782
CGGGACTC 0.0379782	CGGGACTC	0.0379782
CGGGCGTC 0.0379782	CGGGCGTC	0.0379782
AAGGGAGA 0.0379782	AAGGGAGA	0.0379782
AAGGGGGC 0.0379782	AAGGGGGC	0.0379782
CGCCAGCA 0.0379782	CGCCAGCA	0.0379782
GGGGCAGA 0.0379782	GGGGCAGA	0.0379782
CGTGGGGC 0.0379782	CGTGGGGC	0.0379782
CCCACCAC 0.0379782	CCCACCAC	0.0379782
CCCACGGG 0.0379782	CCCACGGG	0.0379782
CCCGACGC 0.0379782	CCCGACGC	0.0379782
CCCGAGAG 0.0379782	CCCGAGAG	0.0379782
CCGGCGAC 0.0379782	CCGGCGAC	0.0379782
CACCTCCG 0.0379782	CACCTCCG	0.0379782
AAGGAAAA 0.0379782	AAGGAAAA	0.0379782
GCTCCCAC 0.0379782	GCTCCCAC	0.0379782
CCCGCGAC 0.0379782	CCCGCGAC	0.0379782
CCCTGTCC 0.0379782	CCCTGTCC	0.0379782
CCGCGCAC 0.0379782	CCGCGCAC	0.0379782
CAGCCTTC 0.0379782	CAGCCTTC	0.0379782
CAGCGGGA 0.0379782	CAGCGGGA	0.0379782
AGGGGCCC 0.0379782	AGGGGCCC	0.0379782
CGACGCCC 0.0379782	CGACGCCC	0.0379782
AGAAGAAA 0.0379782	AGAAGAAA	0.0379782
TGGGGGAA 0.0379782	TGGGGGAA	0.0379782
CGGCCGTC 0.037699	CGGCCGTC	0.037699
GCACAGCC 0.037699	GCACAGCC	0.037699
CGCCGTCC 0.037699	CGCCGTCC	0.037699
CTGAGCAG 0.037699	CTGAGCAG	0.037699
CTGAGCGC 0.037699	CTGAGCGC	0.037699
CTGGGGTC 0.037699	CTGGGGTC	0.037699
AGCCCCCT 0.037699	AGCCCCCT	0.037699
AGCCTGTG 0.037699	AGCCTGTG	0.037699
AGCGCCTC 0.037699	AGCGCCTC	0.037699
CACTCGCC 0.037699	CACTCGCC	0.037699
AGGAAGTG 0.037699	AGGAAGTG	0.037699
AGGAGAAA 0.037699	AGGAGAAA	0.037699
CCACGCGC 0.037699	CCACGCGC	0.037699
GCTCCCCA 0.037699	GCTCCCCA	0.037699
CCCGGCGA 0.037699	CCCGGCGA	0.037699
ACAGCTCC 0.037699	ACAGCTCC	0.037699
GGAGCCAC 0.037699	GGAGCCAC	0.037699
GGAGCGCA 0.037699	GGAGCGCA	0.037699
GGAGCTCA 0.037699	GGAGCTCA	0.037699
CAGCTCGC 0.037699	CAGCTCGC	0.037699
GAAGCAGA 0.037699	GAAGCAGA	0.037699
ACGCCGCG 0.037699	ACGCCGCG	0.037699
CTCAGCAG 0.037699	CTCAGCAG	0.037699
CTCCCTCA 0.037699	CTCCCTCA	0.037699
CCTGCACC 0.037699	CCTGCACC	0.037699
CGCGGAGA 0.0374197	CGCGGAGA	0.0374197
CGCGGGCA 0.0374197	CGCGGGCA	0.0374197
CGGCCTCA 0.0374197	CGGCCTCA	0.0374197
GCAGGCCA 0.0374197	GCAGGCCA	0.0374197
CGCAGGAG 0.0374197	CGCAGGAG	0.0374197
AGAGGGAA 0.0374197	AGAGGGAA	0.0374197
CTGGCCCA 0.0374197	CTGGCCCA	0.0374197
AAAACAAA 0.0374197	AAAACAAA	0.0374197
AAAGGAGG 0.0374197	AAAGGAGG	0.0374197
CCCACTGC 0.0374197	CCCACTGC	0.0374197
CCGGGCGA 0.0374197	CCGGGCGA	0.0374197
CCTCCATC 0.0374197	CCTCCATC	0.0374197
CCTCCGAG 0.0374197	CCTCCGAG	0.0374197
AGCGCCAG 0.0374197	AGCGCCAG	0.0374197
AGCGCGCA 0.0374197	AGCGCGCA	0.0374197
ACCTCCGC 0.0374197	ACCTCCGC	0.0374197
ACCTCCTC 0.0374197	ACCTCCTC	0.0374197
AGCTGAGC 0.0374197	AGCTGAGC	0.0374197
GCCCCAGA 0.0374197	GCCCCAGA	0.0374197
GGAGGTGA 0.0374197	GGAGGTGA	0.0374197
GGCCAGCA 0.0374197	GGCCAGCA	0.0374197
GGCGCGCC 0.0374197	GGCGCGCC	0.0374197
CAGAGGCA 0.0374197	CAGAGGCA	0.0374197
GAGCCACC 0.0374197	GAGCCACC	0.0374197
GAGCCCTC 0.0374197	GAGCCCTC	0.0374197
CTCTCAGC 0.0374197	CTCTCAGC	0.0374197
AGGCTCGG 0.0374197	AGGCTCGG	0.0374197
GCAGGGCA 0.0371405	GCAGGGCA	0.0371405
AGAGCCCG 0.0371405	AGAGCCCG	0.0371405
AGAGCTGC 0.0371405	AGAGCTGC	0.0371405
CGTGGGCC 0.0371405	CGTGGGCC	0.0371405
AAAGGAAA 0.0371405	AAAGGAAA	0.0371405
CCCACGCG 0.0371405	CCCACGCG	0.0371405
CCCCGCGA 0.0371405	CCCCGCGA	0.0371405
CCTCGTCC 0.0371405	CCTCGTCC	0.0371405
CCTCTGTC 0.0371405	CCTCTGTC	0.0371405
AGCCTCGC 0.0371405	AGCCTCGC	0.0371405
ACCACCCT 0.0371405	ACCACCCT	0.0371405
AGGAGCCT 0.0371405	AGGAGCCT	0.0371405
GCGGAGCA 0.0371405	GCGGAGCA	0.0371405
GCGACGCC 0.0371405	GCGACGCC	0.0371405
GCGCAGGA 0.0371405	GCGCAGGA	0.0371405
ACAGGAAG 0.0371405	ACAGGAAG	0.0371405
GGAAGAAA 0.0371405	GGAAGAAA	0.0371405
CACTGCCC 0.0371405	CACTGCCC	0.0371405
GAGAGCCC 0.0371405	GAGAGCCC	0.0371405
GAGCCCGA 0.0371405	GAGCCCGA	0.0371405
ACGCGGCG 0.0371405	ACGCGGCG	0.0371405
CTCCACGC 0.0371405	CTCCACGC	0.0371405
CTCCAGAG 0.0371405	CTCCAGAG	0.0371405
AGGGAAGA 0.0371405	AGGGAAGA	0.0371405
AGGGCCTC 0.0371405	AGGGCCTC	0.0371405
CCTGCGCA 0.0371405	CCTGCGCA	0.0371405
AGAAGGAA 0.0371405	AGAAGGAA	0.0371405
GCAAGGCC 0.0368612	GCAAGGCC	0.0368612
GCAGGAGA 0.0368612	GCAGGAGA	0.0368612
GCAGTCCC 0.0368612	GCAGTCCC	0.0368612
CGCCCACG 0.0368612	CGCCCACG	0.0368612
GGCTCTGA 0.0368612	GGCTCTGA	0.0368612
GGGGAGCA 0.0368612	GGGGAGCA	0.0368612
GGGGGCGA 0.0368612	GGGGGCGA	0.0368612
CTGGGGAA 0.0368612	CTGGGGAA	0.0368612
CTGTGGCC 0.0368612	CTGTGGCC	0.0368612
CTTCCAGC 0.0368612	CTTCCAGC	0.0368612
GACCACAC 0.0368612	GACCACAC	0.0368612
GACTCCCC 0.0368612	GACTCCCC	0.0368612
CCAGGGGA 0.0368612	CCAGGGGA	0.0368612
CCCAGGAA 0.0368612	CCCAGGAA	0.0368612
CCGTGGGC 0.0368612	CCGTGGGC	0.0368612
AGCAGCAC 0.0368612	AGCAGCAC	0.0368612
ACCCAGGA 0.0368612	ACCCAGGA	0.0368612
GCCAAGGC 0.0368612	GCCAAGGC	0.0368612
GCCAGGAC 0.0368612	GCCAGGAC	0.0368612
GCCCTCCA 0.0368612	GCCCTCCA	0.0368612
[truncated: 30,897 more rows]
