# Supplementary material for: Gli3 utilizes Hand2 to synergistically regulate tissue-specific transcriptional networks
Source: eLife. 2020 Oct 2;9:e56450. doi: 10.7554/eLife.56450 (PMC7556880; doi:10.7554/eLife.56450)
Supplement: Supplementary file 3. — Number of instances of GBM and E-box spacing and orientation varieties in Gli3-Hand2 overlap peaks. [file elife-56450-supp3.xlsx]

## Sheet: GLI3_Hand2_COSMO
TF1|TF2|{F/R}|D	COUNTS	n	mu	SD	FC	Z	p-value	COUNTS (peak-based)	TF1 name	TF2 name	TF1/TF2 strands	distance	TF1	TF2	to use
GLI3_Hand2_second_motif.jpwm|GLI3_Hand2_second_motif.jpwm|FF|34	11	100	9.57	3.0059	1.14943	0.475731	0.634266	11	GLI3_Hand2_second_motif	GLI3_Hand2_second_motif	FF	34	GLI3	GLI3	0
GLI3_Hand2_second_motif.jpwm|GLI3_Hand2_second_motif.jpwm|FR|98	2	100	3.14	1.60189	0.636943	-0.711658	0.476677	2	GLI3_Hand2_second_motif	GLI3_Hand2_second_motif	FR	98	GLI3	GLI3	0
GLI3_Hand2_second_motif.jpwm|GLI3_Hand2_second_motif.jpwm|FR|99	3	100	3.2	1.80348	0.9375	-0.110897	0.911698	3	GLI3_Hand2_second_motif	GLI3_Hand2_second_motif	FR	99	GLI3	GLI3	0
GLI3_Hand2_second_motif.jpwm|GLI3_Hand2_second_motif.jpwm|FR|90	1	100	2.82	1.67802	0.35461	-1.08461	0.278094	1	GLI3_Hand2_second_motif	GLI3_Hand2_second_motif	FR	90	GLI3	GLI3	0
GLI3_Hand2_second_motif.jpwm|GLI3_Hand2_second_motif.jpwm|FR|91	3	100	3.17	1.75841	0.946372	-0.096678	0.922982	3	GLI3_Hand2_second_motif	GLI3_Hand2_second_motif	FR	91	GLI3	GLI3	0
GLI3_Hand2_second_motif.jpwm|GLI3_Hand2_second_motif.jpwm|FR|92	5	100	3.3	1.88829	1.51515	0.900283	0.36797	5	GLI3_Hand2_second_motif	GLI3_Hand2_second_motif	FR	92	GLI3	GLI3	0
GLI3_Hand2_second_motif.jpwm|GLI3_Hand2_second_motif.jpwm|FR|94	3	100	3.21	2.25315	0.934579	-0.093203	0.925742	3	GLI3_Hand2_second_motif	GLI3_Hand2_second_motif	FR	94	GLI3	GLI3	0
GLI3_Hand2_second_motif.jpwm|GLI3_Hand2_second_motif.jpwm|FR|95	2	100	3.23	1.70475	0.619195	-0.721515	0.470593	2	GLI3_Hand2_second_motif	GLI3_Hand2_second_motif	FR	95	GLI3	GLI3	0
GLI3_Hand2_second_motif.jpwm|GLI3_Hand2_second_motif.jpwm|FR|96	1	100	3.28	1.85908	0.304878	-1.22642	0.220042	1	GLI3_Hand2_second_motif	GLI3_Hand2_second_motif	FR	96	GLI3	GLI3	0
GLI3_Hand2_second_motif.jpwm|GLI3_Hand2_second_motif.jpwm|FR|97	6	100	3.17	2.00532	1.89274	1.41125	0.158172	6	GLI3_Hand2_second_motif	GLI3_Hand2_second_motif	FR	97	GLI3	GLI3	0
GLI3_Hand2_second_motif.jpwm|GLI3_Hand2_second_motif.jpwm|FR|100	1	100	2.75	1.33617	0.363636	-1.30971	0.190293	1	GLI3_Hand2_second_motif	GLI3_Hand2_second_motif	FR	100	GLI3	GLI3	0
GLI3_Hand2_second_motif.jpwm|GLI3_Hand2_second_motif.jpwm|FF|50	12	100	8.92	2.99387	1.34529	1.02877	0.303588	12	GLI3_Hand2_second_motif	GLI3_Hand2_second_motif	FF	50	GLI3	GLI3	0
GLI3_Hand2_second_motif.jpwm|GLI3_Hand2_second_motif.jpwm|FF|51	4	100	8.51	2.94905	0.470035	-1.52931	0.126188	4	GLI3_Hand2_second_motif	GLI3_Hand2_second_motif	FF	51	GLI3	GLI3	0
GLI3_Hand2_second_motif.jpwm|GLI3_Hand2_second_motif.jpwm|FF|52	5	100	8.69	3.06065	0.575374	-1.20563	0.227962	5	GLI3_Hand2_second_motif	GLI3_Hand2_second_motif	FF	52	GLI3	GLI3	0
GLI3_Hand2_second_motif.jpwm|GLI3_Hand2_second_motif.jpwm|FF|53	12	100	8.41	2.93394	1.42687	1.22361	0.221099	12	GLI3_Hand2_second_motif	GLI3_Hand2_second_motif	FF	53	GLI3	GLI3	0
GLI3_Hand2_second_motif.jpwm|GLI3_Hand2_second_motif.jpwm|FF|54	5	100	8.5	2.73953	0.588235	-1.27759	0.201394	5	GLI3_Hand2_second_motif	GLI3_Hand2_second_motif	FF	54	GLI3	GLI3	0
GLI3_Hand2_second_motif.jpwm|GLI3_Hand2_second_motif.jpwm|FF|55	6	100	8.6	2.832	0.697674	-0.91808	0.358577	6	GLI3_Hand2_second_motif	GLI3_Hand2_second_motif	FF	55	GLI3	GLI3	0
GLI3_Hand2_second_motif.jpwm|GLI3_Hand2_second_motif.jpwm|FF|56	5	100	9.18	2.92457	0.544662	-1.42927	0.152927	5	GLI3_Hand2_second_motif	GLI3_Hand2_second_motif	FF	56	GLI3	GLI3	0
GLI3_Hand2_second_motif.jpwm|GLI3_Hand2_second_motif.jpwm|FF|57	9	100	8.4	2.91288	1.07143	0.205982	0.836805	9	GLI3_Hand2_second_motif	GLI3_Hand2_second_motif	FF	57	GLI3	GLI3	0
GLI3_Hand2_second_motif.jpwm|GLI3_Hand2_second_motif.jpwm|FF|58	15	100	9.21	3.32209	1.62866	1.74288	0.0813545	10	GLI3_Hand2_second_motif	GLI3_Hand2_second_motif	FF	58	GLI3	GLI3	0
GLI3_Hand2_second_motif.jpwm|GLI3_Hand2_second_motif.jpwm|FF|59	8	100	8.72	3.0882	0.917431	-0.233146	0.815648	8	GLI3_Hand2_second_motif	GLI3_Hand2_second_motif	FF	59	GLI3	GLI3	0
GLI3_Hand2_second_motif.jpwm|GLI3_Hand2_second_motif.jpwm|FR|49	4	100	3.19	1.66785	1.25392	0.485656	0.627211	4	GLI3_Hand2_second_motif	GLI3_Hand2_second_motif	FR	49	GLI3	GLI3	0
GLI3_Hand2_second_motif.jpwm|GLI3_Hand2_second_motif.jpwm|FR|48	1	100	3.4	1.68175	0.294118	-1.42708	0.153555	1	GLI3_Hand2_second_motif	GLI3_Hand2_second_motif	FR	48	GLI3	GLI3	0
GLI3_Hand2_second_motif.jpwm|GLI3_Hand2_second_motif.jpwm|FR|47	3	100	3.62	1.85744	0.828729	-0.333792	0.738537	3	GLI3_Hand2_second_motif	GLI3_Hand2_second_motif	FR	47	GLI3	GLI3	0
GLI3_Hand2_second_motif.jpwm|GLI3_Hand2_second_motif.jpwm|FR|45	3	100	3.89	2.12201	0.771208	-0.419414	0.674914	3	GLI3_Hand2_second_motif	GLI3_Hand2_second_motif	FR	45	GLI3	GLI3	0
GLI3_Hand2_second_motif.jpwm|GLI3_Hand2_second_motif.jpwm|FR|44	1	100	3.4	1.63917	0.294118	-1.46416	0.143151	1	GLI3_Hand2_second_motif	GLI3_Hand2_second_motif	FR	44	GLI3	GLI3	0
GLI3_Hand2_second_motif.jpwm|GLI3_Hand2_second_motif.jpwm|FR|43	2	100	3.51	1.8174	0.569801	-0.830859	0.406053	2	GLI3_Hand2_second_motif	GLI3_Hand2_second_motif	FR	43	GLI3	GLI3	0
GLI3_Hand2_second_motif.jpwm|GLI3_Hand2_second_motif.jpwm|FR|42	1	100	3.52	1.84489	0.284091	-1.36593	0.17196	1	GLI3_Hand2_second_motif	GLI3_Hand2_second_motif	FR	42	GLI3	GLI3	0
GLI3_Hand2_second_motif.jpwm|GLI3_Hand2_second_motif.jpwm|FR|41	1	100	3.72	1.6942	0.268817	-1.60548	0.108388	1	GLI3_Hand2_second_motif	GLI3_Hand2_second_motif	FR	41	GLI3	GLI3	0
GLI3_Hand2_second_motif.jpwm|GLI3_Hand2_second_motif.jpwm|FR|40	5	100	3.65	1.96626	1.36986	0.686584	0.492345	5	GLI3_Hand2_second_motif	GLI3_Hand2_second_motif	FR	40	GLI3	GLI3	0
GLI3_Hand2_second_motif.jpwm|GLI3_Hand2_second_motif.jpwm|FR|93	1	100	3.42	1.84872	0.292398	-1.30901	0.19053	1	GLI3_Hand2_second_motif	GLI3_Hand2_second_motif	FR	93	GLI3	GLI3	0
GLI3_Hand2_second_motif.jpwm|GLI3_Hand2_second_motif.jpwm|FF|69	11	100	8.39	2.97089	1.31108	0.878526	0.379658	11	GLI3_Hand2_second_motif	GLI3_Hand2_second_motif	FF	69	GLI3	GLI3	0
GLI3_Hand2_second_motif.jpwm|GLI3_Hand2_second_motif.jpwm|FF|68	10	100	7.7	2.95249	1.2987	0.779005	0.435977	10	GLI3_Hand2_second_motif	GLI3_Hand2_second_motif	FF	68	GLI3	GLI3	0
GLI3_Hand2_second_motif.jpwm|GLI3_Hand2_second_motif.jpwm|FF|65	13	100	7.94	2.75542	1.63728	1.83638	0.0663011	13	GLI3_Hand2_second_motif	GLI3_Hand2_second_motif	FF	65	GLI3	GLI3	0
GLI3_Hand2_second_motif.jpwm|GLI3_Hand2_second_motif.jpwm|FF|64	4	100	8.53	3.20497	0.468933	-1.41343	0.157529	4	GLI3_Hand2_second_motif	GLI3_Hand2_second_motif	FF	64	GLI3	GLI3	0
GLI3_Hand2_second_motif.jpwm|GLI3_Hand2_second_motif.jpwm|FF|67	12	100	7.96	2.64354	1.50754	1.52826	0.126449	12	GLI3_Hand2_second_motif	GLI3_Hand2_second_motif	FF	67	GLI3	GLI3	0
GLI3_Hand2_second_motif.jpwm|GLI3_Hand2_second_motif.jpwm|FF|66	8	100	8.85	2.96912	0.903955	-0.28628	0.774663	8	GLI3_Hand2_second_motif	GLI3_Hand2_second_motif	FF	66	GLI3	GLI3	0
GLI3_Hand2_second_motif.jpwm|GLI3_Hand2_second_motif.jpwm|FF|61	11	100	8.22	2.5607	1.3382	1.08564	0.277638	11	GLI3_Hand2_second_motif	GLI3_Hand2_second_motif	FF	61	GLI3	GLI3	0
GLI3_Hand2_second_motif.jpwm|GLI3_Hand2_second_motif.jpwm|FF|60	8	100	8.52	3.17973	0.938967	-0.163536	0.870097	8	GLI3_Hand2_second_motif	GLI3_Hand2_second_motif	FF	60	GLI3	GLI3	0
GLI3_Hand2_second_motif.jpwm|GLI3_Hand2_second_motif.jpwm|FF|63	7	100	8.52	2.89716	0.821596	-0.524652	0.599825	7	GLI3_Hand2_second_motif	GLI3_Hand2_second_motif	FF	63	GLI3	GLI3	0
GLI3_Hand2_second_motif.jpwm|GLI3_Hand2_second_motif.jpwm|FF|8	36	100	9.4	3.22866	3.82979	8.23871	1.74073e-16	35	GLI3_Hand2_second_motif	GLI3_Hand2_second_motif	FF	8	GLI3	GLI3	0
GLI3_Hand2_second_motif.jpwm|GLI3_Hand2_second_motif.jpwm|FF|0	40	100	8.5	2.73953	4.70588	11.4983	1.34535e-30	36	GLI3_Hand2_second_motif	GLI3_Hand2_second_motif	FF	0	GLI3	GLI3	0
GLI3_Hand2_second_motif.jpwm|GLI3_Hand2_second_motif.jpwm|FF|1	17	100	9.93	3.47358	1.71198	2.03536	0.0418142	16	GLI3_Hand2_second_motif	GLI3_Hand2_second_motif	FF	1	GLI3	GLI3	0
GLI3_Hand2_second_motif.jpwm|GLI3_Hand2_second_motif.jpwm|FF|26	12	100	9.19	3.1485	1.30577	0.892489	0.372131	12	GLI3_Hand2_second_motif	GLI3_Hand2_second_motif	FF	26	GLI3	GLI3	0
GLI3_Hand2_second_motif.jpwm|GLI3_Hand2_second_motif.jpwm|FR|25	3	100	3.64	1.94115	0.824176	-0.329701	0.741626	3	GLI3_Hand2_second_motif	GLI3_Hand2_second_motif	FR	25	GLI3	GLI3	0
GLI3_Hand2_second_motif.jpwm|GLI3_Hand2_second_motif.jpwm|FR|24	6	100	3.67	1.96975	1.63488	1.18289	0.236851	6	GLI3_Hand2_second_motif	GLI3_Hand2_second_motif	FR	24	GLI3	GLI3	0
GLI3_Hand2_second_motif.jpwm|GLI3_Hand2_second_motif.jpwm|RF|10	3	100	3.99	1.75519	0.75188	-0.56404	0.572727	3	GLI3_Hand2_second_motif	GLI3_Hand2_second_motif	RF	10	GLI3	GLI3	0
GLI3_Hand2_second_motif.jpwm|GLI3_Hand2_second_motif.jpwm|RF|11	1	100	3.85	1.82228	0.25974	-1.56397	0.117824	1	GLI3_Hand2_second_motif	GLI3_Hand2_second_motif	RF	11	GLI3	GLI3	0
GLI3_Hand2_second_motif.jpwm|GLI3_Hand2_second_motif.jpwm|RF|12	6	100	3.96	2.21528	1.51515	0.920876	0.357115	6	GLI3_Hand2_second_motif	GLI3_Hand2_second_motif	RF	12	GLI3	GLI3	0
GLI3_Hand2_second_motif.jpwm|GLI3_Hand2_second_motif.jpwm|RF|14	5	100	3.91	1.83179	1.27877	0.595046	0.551812	5	GLI3_Hand2_second_motif	GLI3_Hand2_second_motif	RF	14	GLI3	GLI3	0
GLI3_Hand2_second_motif.jpwm|GLI3_Hand2_second_motif.jpwm|RF|15	2	100	3.78	1.95701	0.529101	-0.90955	0.36306	2	GLI3_Hand2_second_motif	GLI3_Hand2_second_motif	RF	15	GLI3	GLI3	0
GLI3_Hand2_second_motif.jpwm|GLI3_Hand2_second_motif.jpwm|RF|16	3	100	3.72	2.0155	0.806452	-0.357232	0.720918	3	GLI3_Hand2_second_motif	GLI3_Hand2_second_motif	RF	16	GLI3	GLI3	0
GLI3_Hand2_second_motif.jpwm|GLI3_Hand2_second_motif.jpwm|RF|17	4	100	3.74	1.71517	1.06952	0.151588	0.879512	4	GLI3_Hand2_second_motif	GLI3_Hand2_second_motif	RF	17	GLI3	GLI3	0
GLI3_Hand2_second_motif.jpwm|GLI3_Hand2_second_motif.jpwm|RF|18	1	100	3.82	1.69002	0.26178	-1.66862	0.0951925	1	GLI3_Hand2_second_motif	GLI3_Hand2_second_motif	RF	18	GLI3	GLI3	0
GLI3_Hand2_second_motif.jpwm|GLI3_Hand2_second_motif.jpwm|RF|19	5	100	3.62	1.77968	1.38122	0.775419	0.438092	5	GLI3_Hand2_second_motif	GLI3_Hand2_second_motif	RF	19	GLI3	GLI3	0
GLI3_Hand2_second_motif.jpwm|GLI3_Hand2_second_motif.jpwm|RF|54	7	100	3.59	1.86999	1.94986	1.82354	0.068222	7	GLI3_Hand2_second_motif	GLI3_Hand2_second_motif	RF	54	GLI3	GLI3	0
GLI3_Hand2_second_motif.jpwm|GLI3_Hand2_second_motif.jpwm|FR|58	3	100	3.31	1.87861	0.906344	-0.165015	0.868932	3	GLI3_Hand2_second_motif	GLI3_Hand2_second_motif	FR	58	GLI3	GLI3	0
GLI3_Hand2_second_motif.jpwm|GLI3_Hand2_second_motif.jpwm|FR|59	1	100	3.52	1.77229	0.284091	-1.42189	0.155058	1	GLI3_Hand2_second_motif	GLI3_Hand2_second_motif	FR	59	GLI3	GLI3	0
GLI3_Hand2_second_motif.jpwm|GLI3_Hand2_second_motif.jpwm|FR|54	2	100	3.38	1.73368	0.591716	-0.795993	0.426036	2	GLI3_Hand2_second_motif	GLI3_Hand2_second_motif	FR	54	GLI3	GLI3	0
GLI3_Hand2_second_motif.jpwm|GLI3_Hand2_second_motif.jpwm|FR|55	3	100	3.54	1.85549	0.847458	-0.291029	0.771029	3	GLI3_Hand2_second_motif	GLI3_Hand2_second_motif	FR	55	GLI3	GLI3	0
GLI3_Hand2_second_motif.jpwm|GLI3_Hand2_second_motif.jpwm|FR|56	3	100	3.4	1.80348	0.882353	-0.221794	0.824474	3	GLI3_Hand2_second_motif	GLI3_Hand2_second_motif	FR	56	GLI3	GLI3	0
GLI3_Hand2_second_motif.jpwm|GLI3_Hand2_second_motif.jpwm|FR|57	5	100	3.43	1.59706	1.45773	0.983055	0.32558	5	GLI3_Hand2_second_motif	GLI3_Hand2_second_motif	FR	57	GLI3	GLI3	0
GLI3_Hand2_second_motif.jpwm|GLI3_Hand2_second_motif.jpwm|FR|50	3	100	3.74	1.84566	0.802139	-0.40094	0.688464	3	GLI3_Hand2_second_motif	GLI3_Hand2_second_motif	FR	50	GLI3	GLI3	0
GLI3_Hand2_second_motif.jpwm|GLI3_Hand2_second_motif.jpwm|FR|51	6	100	3.75	2.08591	1.6	1.07867	0.280736	6	GLI3_Hand2_second_motif	GLI3_Hand2_second_motif	FR	51	GLI3	GLI3	0
GLI3_Hand2_second_motif.jpwm|GLI3_Hand2_second_motif.jpwm|FR|52	3	100	3.36	1.63002	0.892857	-0.220856	0.825205	3	GLI3_Hand2_second_motif	GLI3_Hand2_second_motif	FR	52	GLI3	GLI3	0
GLI3_Hand2_second_motif.jpwm|GLI3_Hand2_second_motif.jpwm|FR|53	2	100	3.48	1.99737	0.574713	-0.740974	0.458709	2	GLI3_Hand2_second_motif	GLI3_Hand2_second_motif	FR	53	GLI3	GLI3	0
GLI3_Hand2_second_motif.jpwm|GLI3_Hand2_second_motif.jpwm|FF|78	8	100	8.48	2.44321	0.943396	-0.196463	0.844248	8	GLI3_Hand2_second_motif	GLI3_Hand2_second_motif	FF	78	GLI3	GLI3	0
GLI3_Hand2_second_motif.jpwm|GLI3_Hand2_second_motif.jpwm|FF|79	6	100	8.1	3.08957	0.740741	-0.679706	0.496691	6	GLI3_Hand2_second_motif	GLI3_Hand2_second_motif	FF	79	GLI3	GLI3	0
GLI3_Hand2_second_motif.jpwm|GLI3_Hand2_second_motif.jpwm|FF|72	8	100	8.15	2.64527	0.981595	-0.0567049	0.95478	8	GLI3_Hand2_second_motif	GLI3_Hand2_second_motif	FF	72	GLI3	GLI3	0
GLI3_Hand2_second_motif.jpwm|GLI3_Hand2_second_motif.jpwm|FF|73	6	100	8.39	3.16832	0.715137	-0.754342	0.450644	6	GLI3_Hand2_second_motif	GLI3_Hand2_second_motif	FF	73	GLI3	GLI3	0
GLI3_Hand2_second_motif.jpwm|GLI3_Hand2_second_motif.jpwm|FF|70	10	100	8.3	2.73215	1.20482	0.62222	0.533797	10	GLI3_Hand2_second_motif	GLI3_Hand2_second_motif	FF	70	GLI3	GLI3	0
GLI3_Hand2_second_motif.jpwm|GLI3_Hand2_second_motif.jpwm|FF|71	8	100	8.46	2.99973	0.945626	-0.153347	0.878125	8	GLI3_Hand2_second_motif	GLI3_Hand2_second_motif	FF	71	GLI3	GLI3	0
GLI3_Hand2_second_motif.jpwm|GLI3_Hand2_second_motif.jpwm|FF|76	8	100	7.94	2.79545	1.00756	0.0214634	0.982876	8	GLI3_Hand2_second_motif	GLI3_Hand2_second_motif	FF	76	GLI3	GLI3	0
GLI3_Hand2_second_motif.jpwm|GLI3_Hand2_second_motif.jpwm|FF|77	5	100	8.86	2.84275	0.564334	-1.35784	0.174514	5	GLI3_Hand2_second_motif	GLI3_Hand2_second_motif	FF	77	GLI3	GLI3	0
GLI3_Hand2_second_motif.jpwm|GLI3_Hand2_second_motif.jpwm|FF|74	12	100	8.68	3.05465	1.38249	1.08687	0.277096	11	GLI3_Hand2_second_motif	GLI3_Hand2_second_motif	FF	74	GLI3	GLI3	0
GLI3_Hand2_second_motif.jpwm|GLI3_Hand2_second_motif.jpwm|FF|75	4	100	8.11	2.50613	0.493218	-1.63998	0.10101	4	GLI3_Hand2_second_motif	GLI3_Hand2_second_motif	FF	75	GLI3	GLI3	0
GLI3_Hand2_second_motif.jpwm|GLI3_Hand2_second_motif.jpwm|RF|29	22	100	3.81	1.96276	5.77428	9.26757	1.90444e-20	22	GLI3_Hand2_second_motif	GLI3_Hand2_second_motif	RF	29	GLI3	GLI3	0
GLI3_Hand2_second_motif.jpwm|GLI3_Hand2_second_motif.jpwm|RF|28	5	100	3.43	1.84366	1.45773	0.851566	0.394455	5	GLI3_Hand2_second_motif	GLI3_Hand2_second_motif	RF	28	GLI3	GLI3	0
GLI3_Hand2_second_motif.jpwm|GLI3_Hand2_second_motif.jpwm|RF|25	6	100	3.99	1.85044	1.50376	1.08623	0.277379	6	GLI3_Hand2_second_motif	GLI3_Hand2_second_motif	RF	25	GLI3	GLI3	0
GLI3_Hand2_second_motif.jpwm|GLI3_Hand2_second_motif.jpwm|RF|24	7	100	3.48	1.77798	2.01149	1.97978	0.0477288	7	GLI3_Hand2_second_motif	GLI3_Hand2_second_motif	RF	24	GLI3	GLI3	0
GLI3_Hand2_second_motif.jpwm|GLI3_Hand2_second_motif.jpwm|RF|27	1	100	3.57	1.77101	0.280112	-1.45115	0.146738	1	GLI3_Hand2_second_motif	GLI3_Hand2_second_motif	RF	27	GLI3	GLI3	0
GLI3_Hand2_second_motif.jpwm|GLI3_Hand2_second_motif.jpwm|RF|26	3	100	3.74	1.75015	0.802139	-0.422821	0.672426	3	GLI3_Hand2_second_motif	GLI3_Hand2_second_motif	RF	26	GLI3	GLI3	0
GLI3_Hand2_second_motif.jpwm|GLI3_Hand2_second_motif.jpwm|RF|21	5	100	3.59	1.70617	1.39276	0.826413	0.40857	5	GLI3_Hand2_second_motif	GLI3_Hand2_second_motif	RF	21	GLI3	GLI3	0
GLI3_Hand2_second_motif.jpwm|GLI3_Hand2_second_motif.jpwm|RF|23	1	100	3.71	1.8872	0.269542	-1.43599	0.151005	1	GLI3_Hand2_second_motif	GLI3_Hand2_second_motif	RF	23	GLI3	GLI3	0
GLI3_Hand2_second_motif.jpwm|GLI3_Hand2_second_motif.jpwm|RF|22	3	100	3.53	1.75496	0.849858	-0.302	0.762652	3	GLI3_Hand2_second_motif	GLI3_Hand2_second_motif	RF	22	GLI3	GLI3	0
GLI3_Hand2_second_motif.jpwm|GLI3_Hand2_second_motif.jpwm|RF|8	3	100	3.52	2.03246	0.852273	-0.255847	0.798069	3	GLI3_Hand2_second_motif	GLI3_Hand2_second_motif	RF	8	GLI3	GLI3	0
GLI3_Hand2_second_motif.jpwm|GLI3_Hand2_second_motif.jpwm|RF|9	5	100	3.69	1.7448	1.35501	0.7508	0.452773	5	GLI3_Hand2_second_motif	GLI3_Hand2_second_motif	RF	9	GLI3	GLI3	0
GLI3_Hand2_second_motif.jpwm|GLI3_Hand2_second_motif.jpwm|RF|2	4	100	3.57	2.02637	1.12045	0.212202	0.831949	4	GLI3_Hand2_second_motif	GLI3_Hand2_second_motif	RF	2	GLI3	GLI3	0
GLI3_Hand2_second_motif.jpwm|GLI3_Hand2_second_motif.jpwm|RF|3	1	100	3.92	1.7505	0.255102	-1.6681	0.0952965	1	GLI3_Hand2_second_motif	GLI3_Hand2_second_motif	RF	3	GLI3	GLI3	0
GLI3_Hand2_second_motif.jpwm|GLI3_Hand2_second_motif.jpwm|RF|6	5	100	3.67	1.87517	1.3624	0.709269	0.478158	5	GLI3_Hand2_second_motif	GLI3_Hand2_second_motif	RF	6	GLI3	GLI3	0
GLI3_Hand2_second_motif.jpwm|GLI3_Hand2_second_motif.jpwm|RF|7	3	100	3.95	2.21736	0.759494	-0.428438	0.668332	3	GLI3_Hand2_second_motif	GLI3_Hand2_second_motif	RF	7	GLI3	GLI3	0
GLI3_Hand2_second_motif.jpwm|GLI3_Hand2_second_motif.jpwm|RF|4	5	100	4.14	1.98489	1.20773	0.433273	0.664817	5	GLI3_Hand2_second_motif	GLI3_Hand2_second_motif	RF	4	GLI3	GLI3	0
GLI3_Hand2_second_motif.jpwm|GLI3_Hand2_second_motif.jpwm|RF|5	3	100	3.95	1.69595	0.759494	-0.560156	0.575373	3	GLI3_Hand2_second_motif	GLI3_Hand2_second_motif	RF	5	GLI3	GLI3	0
GLI3_Hand2_second_motif.jpwm|GLI3_Hand2_second_motif.jpwm|RF|92	3	100	3.11	1.89041	0.96463	-0.0581885	0.953598	3	GLI3_Hand2_second_motif	GLI3_Hand2_second_motif	RF	92	GLI3	GLI3	0
GLI3_Hand2_second_motif.jpwm|GLI3_Hand2_second_motif.jpwm|FR|69	2	100	3.32	1.90629	0.60241	-0.692445	0.488658	2	GLI3_Hand2_second_motif	GLI3_Hand2_second_motif	FR	69	GLI3	GLI3	0
GLI3_Hand2_second_motif.jpwm|GLI3_Hand2_second_motif.jpwm|FR|68	1	100	3.05	1.69595	0.327869	-1.20876	0.226756	1	GLI3_Hand2_second_motif	GLI3_Hand2_second_motif	FR	68	GLI3	GLI3	0
GLI3_Hand2_second_motif.jpwm|GLI3_Hand2_second_motif.jpwm|FR|61	5	100	3.37	1.94705	1.48368	0.837163	0.402501	5	GLI3_Hand2_second_motif	GLI3_Hand2_second_motif	FR	61	GLI3	GLI3	0
GLI3_Hand2_second_motif.jpwm|GLI3_Hand2_second_motif.jpwm|FR|60	5	100	3.39	2.05429	1.47493	0.783726	0.433201	5	GLI3_Hand2_second_motif	GLI3_Hand2_second_motif	FR	60	GLI3	GLI3	0
GLI3_Hand2_second_motif.jpwm|GLI3_Hand2_second_motif.jpwm|FR|63	2	100	3.29	1.7826	0.607903	-0.72366	0.469274	2	GLI3_Hand2_second_motif	GLI3_Hand2_second_motif	FR	63	GLI3	GLI3	0
GLI3_Hand2_second_motif.jpwm|GLI3_Hand2_second_motif.jpwm|FR|62	4	100	3.49	1.74943	1.14613	0.291524	0.770651	4	GLI3_Hand2_second_motif	GLI3_Hand2_second_motif	FR	62	GLI3	GLI3	0
GLI3_Hand2_second_motif.jpwm|GLI3_Hand2_second_motif.jpwm|FR|65	3	100	3.54	1.749	0.847458	-0.308748	0.757513	3	GLI3_Hand2_second_motif	GLI3_Hand2_second_motif	FR	65	GLI3	GLI3	0
GLI3_Hand2_second_motif.jpwm|GLI3_Hand2_second_motif.jpwm|FR|67	2	100	3.65	1.92472	0.547945	-0.857268	0.391297	2	GLI3_Hand2_second_motif	GLI3_Hand2_second_motif	FR	67	GLI3	GLI3	0
GLI3_Hand2_second_motif.jpwm|GLI3_Hand2_second_motif.jpwm|FF|86	10	100	7.84	2.77332	1.27551	0.778849	0.436068	10	GLI3_Hand2_second_motif	GLI3_Hand2_second_motif	FF	86	GLI3	GLI3	0
GLI3_Hand2_second_motif.jpwm|GLI3_Hand2_second_motif.jpwm|FF|83	5	100	8.06	3.01786	0.620347	-1.01396	0.3106	5	GLI3_Hand2_second_motif	GLI3_Hand2_second_motif	FF	83	GLI3	GLI3	0
GLI3_Hand2_second_motif.jpwm|GLI3_Hand2_second_motif.jpwm|FF|82	3	100	7.92	3.02408	0.378788	-1.62694	0.103749	3	GLI3_Hand2_second_motif	GLI3_Hand2_second_motif	FF	82	GLI3	GLI3	0
GLI3_Hand2_second_motif.jpwm|GLI3_Hand2_second_motif.jpwm|FF|81	12	100	8.21	2.66399	1.46163	1.42268	0.15483	12	GLI3_Hand2_second_motif	GLI3_Hand2_second_motif	FF	81	GLI3	GLI3	0
GLI3_Hand2_second_motif.jpwm|GLI3_Hand2_second_motif.jpwm|FF|89	11	100	7.34	3.14055	1.49864	1.1654	0.243856	11	GLI3_Hand2_second_motif	GLI3_Hand2_second_motif	FF	89	GLI3	GLI3	0
GLI3_Hand2_second_motif.jpwm|GLI3_Hand2_second_motif.jpwm|FF|88	10	100	7.05	2.5717	1.41844	1.1471	0.25134	10	GLI3_Hand2_second_motif	GLI3_Hand2_second_motif	FF	88	GLI3	GLI3	0
GLI3_Hand2_second_motif.jpwm|GLI3_Hand2_second_motif.jpwm|RF|20	4	100	3.66	1.76509	1.0929	0.192624	0.847253	4	GLI3_Hand2_second_motif	GLI3_Hand2_second_motif	RF	20	GLI3	GLI3	0
GLI3_Hand2_second_motif.jpwm|GLI3_Hand2_second_motif.jpwm|RF|38	5	100	3.36	1.88305	1.4881	0.87093	0.383792	5	GLI3_Hand2_second_motif	GLI3_Hand2_second_motif	RF	38	GLI3	GLI3	0
GLI3_Hand2_second_motif.jpwm|GLI3_Hand2_second_motif.jpwm|RF|39	2	100	3.78	2.04287	0.529101	-0.871322	0.383579	2	GLI3_Hand2_second_motif	GLI3_Hand2_second_motif	RF	39	GLI3	GLI3	0
GLI3_Hand2_second_motif.jpwm|GLI3_Hand2_second_motif.jpwm|RF|32	3	100	3.34	1.8544	0.898204	-0.183348	0.854525	3	GLI3_Hand2_second_motif	GLI3_Hand2_second_motif	RF	32	GLI3	GLI3	0
GLI3_Hand2_second_motif.jpwm|GLI3_Hand2_second_motif.jpwm|RF|33	4	100	3.84	1.91601	1.04167	0.0835067	0.933449	4	GLI3_Hand2_second_motif	GLI3_Hand2_second_motif	RF	33	GLI3	GLI3	0
GLI3_Hand2_second_motif.jpwm|GLI3_Hand2_second_motif.jpwm|RF|30	5	100	4.05	2.07133	1.23457	0.458643	0.646491	5	GLI3_Hand2_second_motif	GLI3_Hand2_second_motif	RF	30	GLI3	GLI3	0
GLI3_Hand2_second_motif.jpwm|GLI3_Hand2_second_motif.jpwm|RF|31	5	100	3.74	1.87283	1.3369	0.67278	0.501087	5	GLI3_Hand2_second_motif	GLI3_Hand2_second_motif	RF	31	GLI3	GLI3	0
GLI3_Hand2_second_motif.jpwm|GLI3_Hand2_second_motif.jpwm|RF|36	4	100	3.24	1.64605	1.23457	0.46171	0.644289	4	GLI3_Hand2_second_motif	GLI3_Hand2_second_motif	RF	36	GLI3	GLI3	0
GLI3_Hand2_second_motif.jpwm|GLI3_Hand2_second_motif.jpwm|RF|37	4	100	3.56	1.82751	1.1236	0.240765	0.809738	4	GLI3_Hand2_second_motif	GLI3_Hand2_second_motif	RF	37	GLI3	GLI3	0
GLI3_Hand2_second_motif.jpwm|GLI3_Hand2_second_motif.jpwm|RF|34	2	100	3.86	2.0549	0.518135	-0.905152	0.365385	2	GLI3_Hand2_second_motif	GLI3_Hand2_second_motif	RF	34	GLI3	GLI3	0
GLI3_Hand2_second_motif.jpwm|GLI3_Hand2_second_motif.jpwm|RF|35	2	100	3.67	1.92304	0.544959	-0.868417	0.385166	2	GLI3_Hand2_second_motif	GLI3_Hand2_second_motif	RF	35	GLI3	GLI3	0
GLI3_Hand2_second_motif.jpwm|GLI3_Hand2_second_motif.jpwm|FR|76	5	100	3.64	1.94635	1.37363	0.698743	0.484712	5	GLI3_Hand2_second_motif	GLI3_Hand2_second_motif	FR	76	GLI3	GLI3	0
GLI3_Hand2_second_motif.jpwm|GLI3_Hand2_second_motif.jpwm|FR|77	3	100	3.01	1.78939	0.996678	-0.00558849	0.995541	3	GLI3_Hand2_second_motif	GLI3_Hand2_second_motif	FR	77	GLI3	GLI3	0
GLI3_Hand2_second_motif.jpwm|GLI3_Hand2_second_motif.jpwm|FR|74	5	100	3.25	1.83333	1.53846	0.954545	0.339808	5	GLI3_Hand2_second_motif	GLI3_Hand2_second_motif	FR	74	GLI3	GLI3	0
GLI3_Hand2_second_motif.jpwm|GLI3_Hand2_second_motif.jpwm|FR|75	10	100	3.56	1.94011	2.80899	3.31939	0.000902132	10	GLI3_Hand2_second_motif	GLI3_Hand2_second_motif	FR	75	GLI3	GLI3	0
GLI3_Hand2_second_motif.jpwm|GLI3_Hand2_second_motif.jpwm|FR|72	6	100	3.31	1.6919	1.81269	1.58993	0.111851	6	GLI3_Hand2_second_motif	GLI3_Hand2_second_motif	FR	72	GLI3	GLI3	0
GLI3_Hand2_second_motif.jpwm|GLI3_Hand2_second_motif.jpwm|FR|73	1	100	3.29	1.68352	0.303951	-1.36024	0.173753	1	GLI3_Hand2_second_motif	GLI3_Hand2_second_motif	FR	73	GLI3	GLI3	0
GLI3_Hand2_second_motif.jpwm|GLI3_Hand2_second_motif.jpwm|FR|70	2	100	3.51	2.13435	0.569801	-0.707475	0.479271	2	GLI3_Hand2_second_motif	GLI3_Hand2_second_motif	FR	70	GLI3	GLI3	0
GLI3_Hand2_second_motif.jpwm|GLI3_Hand2_second_motif.jpwm|FR|71	3	100	3.43	1.75956	0.874636	-0.244379	0.806937	3	GLI3_Hand2_second_motif	GLI3_Hand2_second_motif	FR	71	GLI3	GLI3	0
GLI3_Hand2_second_motif.jpwm|GLI3_Hand2_second_motif.jpwm|FR|78	6	100	3.48	1.72609	1.72414	1.45995	0.144305	6	GLI3_Hand2_second_motif	GLI3_Hand2_second_motif	FR	78	GLI3	GLI3	0
GLI3_Hand2_second_motif.jpwm|GLI3_Hand2_second_motif.jpwm|FR|79	3	100	3.37	1.69762	0.890208	-0.217952	0.827467	3	GLI3_Hand2_second_motif	GLI3_Hand2_second_motif	FR	79	GLI3	GLI3	0
GLI3_Hand2_second_motif.jpwm|GLI3_Hand2_second_motif.jpwm|FF|94	9	100	7.63	2.66536	1.17955	0.514002	0.607251	9	GLI3_Hand2_second_motif	GLI3_Hand2_second_motif	FF	94	GLI3	GLI3	0
GLI3_Hand2_second_motif.jpwm|GLI3_Hand2_second_motif.jpwm|FF|95	5	100	7.99	2.61887	0.625782	-1.14171	0.253573	5	GLI3_Hand2_second_motif	GLI3_Hand2_second_motif	FF	95	GLI3	GLI3	0
GLI3_Hand2_second_motif.jpwm|GLI3_Hand2_second_motif.jpwm|FF|96	9	100	7.37	2.47678	1.22117	0.658112	0.510466	9	GLI3_Hand2_second_motif	GLI3_Hand2_second_motif	FF	96	GLI3	GLI3	0
GLI3_Hand2_second_motif.jpwm|GLI3_Hand2_second_motif.jpwm|FF|90	8	100	8.01	3.22395	0.998752	-0.00310179	0.997525	8	GLI3_Hand2_second_motif	GLI3_Hand2_second_motif	FF	90	GLI3	GLI3	0
GLI3_Hand2_second_motif.jpwm|GLI3_Hand2_second_motif.jpwm|FF|91	14	100	8.42	2.98203	1.66271	1.87121	0.0613165	10	GLI3_Hand2_second_motif	GLI3_Hand2_second_motif	FF	91	GLI3	GLI3	0
GLI3_Hand2_second_motif.jpwm|GLI3_Hand2_second_motif.jpwm|FF|92	7	100	7.7	2.53262	0.909091	-0.276394	0.782245	7	GLI3_Hand2_second_motif	GLI3_Hand2_second_motif	FF	92	GLI3	GLI3	0
GLI3_Hand2_second_motif.jpwm|GLI3_Hand2_second_motif.jpwm|FF|93	9	100	7.79	3.08235	1.15533	0.392557	0.694647	8	GLI3_Hand2_second_motif	GLI3_Hand2_second_motif	FF	93	GLI3	GLI3	0
GLI3_Hand2_second_motif.jpwm|GLI3_Hand2_second_motif.jpwm|FF|98	4	100	7.4	2.79971	0.540541	-1.21441	0.224591	4	GLI3_Hand2_second_motif	GLI3_Hand2_second_motif	FF	98	GLI3	GLI3	0
GLI3_Hand2_second_motif.jpwm|GLI3_Hand2_second_motif.jpwm|FF|99	11	100	7.97	2.75041	1.38018	1.10165	0.270612	11	GLI3_Hand2_second_motif	GLI3_Hand2_second_motif	FF	99	GLI3	GLI3	0
GLI3_Hand2_second_motif.jpwm|GLI3_Hand2_second_motif.jpwm|FF|35	12	100	9.09	2.98851	1.32013	0.973728	0.330191	12	GLI3_Hand2_second_motif	GLI3_Hand2_second_motif	FF	35	GLI3	GLI3	0
GLI3_Hand2_second_motif.jpwm|GLI3_Hand2_second_motif.jpwm|FF|33	11	100	9.29	3.05603	1.18407	0.55955	0.575786	11	GLI3_Hand2_second_motif	GLI3_Hand2_second_motif	FF	33	GLI3	GLI3	0
GLI3_Hand2_second_motif.jpwm|GLI3_Hand2_second_motif.jpwm|FF|30	4	100	9.31	2.95315	0.429646	-1.79808	0.0721646	4	GLI3_Hand2_second_motif	GLI3_Hand2_second_motif	FF	30	GLI3	GLI3	0
GLI3_Hand2_second_motif.jpwm|GLI3_Hand2_second_motif.jpwm|RF|1	3	100	3.42	2.0898	0.877193	-0.200976	0.840717	3	GLI3_Hand2_second_motif	GLI3_Hand2_second_motif	RF	1	GLI3	GLI3	0
GLI3_Hand2_second_motif.jpwm|GLI3_Hand2_second_motif.jpwm|FR|66	3	100	3.55	1.96111	0.84507	-0.280453	0.77913	3	GLI3_Hand2_second_motif	GLI3_Hand2_second_motif	FR	66	GLI3	GLI3	0
GLI3_Hand2_second_motif.jpwm|GLI3_Hand2_second_motif.jpwm|FR|8	3	100	3.9	1.87218	0.769231	-0.480724	0.630713	3	GLI3_Hand2_second_motif	GLI3_Hand2_second_motif	FR	8	GLI3	GLI3	0
GLI3_Hand2_second_motif.jpwm|GLI3_Hand2_second_motif.jpwm|FR|2	3	100	3.8	2.00504	0.789474	-0.398994	0.689898	3	GLI3_Hand2_second_motif	GLI3_Hand2_second_motif	FR	2	GLI3	GLI3	0
GLI3_Hand2_second_motif.jpwm|GLI3_Hand2_second_motif.jpwm|FR|3	4	100	3.69	1.81294	1.08401	0.170993	0.86423	4	GLI3_Hand2_second_motif	GLI3_Hand2_second_motif	FR	3	GLI3	GLI3	0
GLI3_Hand2_second_motif.jpwm|GLI3_Hand2_second_motif.jpwm|FR|0	6	100	3.78	1.92054	1.5873	1.15592	0.247713	6	GLI3_Hand2_second_motif	GLI3_Hand2_second_motif	FR	0	GLI3	GLI3	0
GLI3_Hand2_second_motif.jpwm|GLI3_Hand2_second_motif.jpwm|FR|1	9	100	3.88	1.84927	2.31959	2.76866	0.00562872	9	GLI3_Hand2_second_motif	GLI3_Hand2_second_motif	FR	1	GLI3	GLI3	0
GLI3_Hand2_second_motif.jpwm|GLI3_Hand2_second_motif.jpwm|FR|6	6	100	3.84	1.97315	1.5625	1.09469	0.27365	6	GLI3_Hand2_second_motif	GLI3_Hand2_second_motif	FR	6	GLI3	GLI3	0
GLI3_Hand2_second_motif.jpwm|GLI3_Hand2_second_motif.jpwm|FR|5	6	100	3.89	1.96379	1.54242	1.07445	0.282619	6	GLI3_Hand2_second_motif	GLI3_Hand2_second_motif	FR	5	GLI3	GLI3	0
GLI3_Hand2_second_motif.jpwm|GLI3_Hand2_second_motif.jpwm|FR|10	4	100	3.91	1.75289	1.02302	0.0513438	0.959052	4	GLI3_Hand2_second_motif	GLI3_Hand2_second_motif	FR	10	GLI3	GLI3	0
GLI3_Hand2_second_motif.jpwm|GLI3_Hand2_second_motif.jpwm|FR|11	3	100	3.83	1.84257	0.78329	-0.450459	0.65238	3	GLI3_Hand2_second_motif	GLI3_Hand2_second_motif	FR	11	GLI3	GLI3	0
GLI3_Hand2_second_motif.jpwm|GLI3_Hand2_second_motif.jpwm|FR|12	3	100	4.14	2.00514	0.724638	-0.568537	0.56967	3	GLI3_Hand2_second_motif	GLI3_Hand2_second_motif	FR	12	GLI3	GLI3	0
GLI3_Hand2_second_motif.jpwm|GLI3_Hand2_second_motif.jpwm|FR|13	4	100	3.51	2.22245	1.1396	0.220477	0.8255	4	GLI3_Hand2_second_motif	GLI3_Hand2_second_motif	FR	13	GLI3	GLI3	0
GLI3_Hand2_second_motif.jpwm|GLI3_Hand2_second_motif.jpwm|FR|14	3	100	3.95	2.03194	0.759494	-0.467533	0.640119	3	GLI3_Hand2_second_motif	GLI3_Hand2_second_motif	FR	14	GLI3	GLI3	0
GLI3_Hand2_second_motif.jpwm|GLI3_Hand2_second_motif.jpwm|FR|15	6	100	3.53	2.01236	1.69972	1.22741	0.219667	6	GLI3_Hand2_second_motif	GLI3_Hand2_second_motif	FR	15	GLI3	GLI3	0
GLI3_Hand2_second_motif.jpwm|GLI3_Hand2_second_motif.jpwm|FR|16	4	100	3.8	1.77525	1.05263	0.11266	0.9103	4	GLI3_Hand2_second_motif	GLI3_Hand2_second_motif	FR	16	GLI3	GLI3	0
GLI3_Hand2_second_motif.jpwm|GLI3_Hand2_second_motif.jpwm|FR|17	4	100	3.88	1.77115	1.03093	0.0677526	0.945983	4	GLI3_Hand2_second_motif	GLI3_Hand2_second_motif	FR	17	GLI3	GLI3	0
GLI3_Hand2_second_motif.jpwm|GLI3_Hand2_second_motif.jpwm|FR|18	5	100	3.73	1.72829	1.34048	0.734832	0.462442	5	GLI3_Hand2_second_motif	GLI3_Hand2_second_motif	FR	18	GLI3	GLI3	0
GLI3_Hand2_second_motif.jpwm|GLI3_Hand2_second_motif.jpwm|FR|19	2	100	3.87	1.97793	0.516796	-0.945431	0.344439	2	GLI3_Hand2_second_motif	GLI3_Hand2_second_motif	FR	19	GLI3	GLI3	0
GLI3_Hand2_second_motif.jpwm|GLI3_Hand2_second_motif.jpwm|FF|87	9	100	8.25	2.77934	1.09091	0.269848	0.787277	9	GLI3_Hand2_second_motif	GLI3_Hand2_second_motif	FF	87	GLI3	GLI3	0
GLI3_Hand2_second_motif.jpwm|GLI3_Hand2_second_motif.jpwm|FF|85	6	100	8.17	2.51482	0.734394	-0.862883	0.388202	6	GLI3_Hand2_second_motif	GLI3_Hand2_second_motif	FF	85	GLI3	GLI3	0
GLI3_Hand2_second_motif.jpwm|GLI3_Hand2_second_motif.jpwm|FF|84	9	100	7.84	2.88752	1.14796	0.401729	0.687884	9	GLI3_Hand2_second_motif	GLI3_Hand2_second_motif	FF	84	GLI3	GLI3	0
GLI3_Hand2_second_motif.jpwm|GLI3_Hand2_second_motif.jpwm|FF|80	9	100	8.14	2.89207	1.10565	0.297365	0.766188	9	GLI3_Hand2_second_motif	GLI3_Hand2_second_motif	FF	80	GLI3	GLI3	0
GLI3_Hand2_second_motif.jpwm|GLI3_Hand2_second_motif.jpwm|FF|-1	1	100	0.43	0.7	2.32558	0.814286	0.415481	1	GLI3_Hand2_second_motif	GLI3_Hand2_second_motif	FF	-1	GLI3	GLI3	0
GLI3_Hand2_second_motif.jpwm|GLI3_Hand2_second_motif.jpwm|FF|-2	1	100	0.95	0.9783	1.05263	0.0511091	0.959239	1	GLI3_Hand2_second_motif	GLI3_Hand2_second_motif	FF	-2	GLI3	GLI3	0
GLI3_Hand2_second_motif.jpwm|GLI3_Hand2_second_motif.jpwm|FF|-3	2	100	1.98	1.43534	1.0101	0.013934	0.988883	2	GLI3_Hand2_second_motif	GLI3_Hand2_second_motif	FF	-3	GLI3	GLI3	0
GLI3_Hand2_second_motif.jpwm|GLI3_Hand2_second_motif.jpwm|FF|-4	163	100	40.78	6.53905	3.99706	18.6908	5.88412e-78	134	GLI3_Hand2_second_motif	GLI3_Hand2_second_motif	FF	-4	GLI3	GLI3	0
GLI3_Hand2_second_motif.jpwm|GLI3_Hand2_second_motif.jpwm|FF|-5	1	100	2.7	1.67272	0.37037	-1.01631	0.309481	1	GLI3_Hand2_second_motif	GLI3_Hand2_second_motif	FF	-5	GLI3	GLI3	0
GLI3_Hand2_second_motif.jpwm|GLI3_Hand2_second_motif.jpwm|FF|9	11	100	9.74	3.0604	1.12936	0.411711	0.680552	11	GLI3_Hand2_second_motif	GLI3_Hand2_second_motif	FF	9	GLI3	GLI3	0
GLI3_Hand2_second_motif.jpwm|GLI3_Hand2_second_motif.jpwm|FF|6	15	100	9.29	2.88603	1.61464	1.97849	0.047873	15	GLI3_Hand2_second_motif	GLI3_Hand2_second_motif	FF	6	GLI3	GLI3	0
GLI3_Hand2_second_motif.jpwm|GLI3_Hand2_second_motif.jpwm|FF|7	16	100	10.07	3.12454	1.58888	1.89788	0.0577117	16	GLI3_Hand2_second_motif	GLI3_Hand2_second_motif	FF	7	GLI3	GLI3	0
GLI3_Hand2_second_motif.jpwm|GLI3_Hand2_second_motif.jpwm|FF|4	39	100	9.77	3.35103	3.99181	8.72269	2.71659e-18	38	GLI3_Hand2_second_motif	GLI3_Hand2_second_motif	FF	4	GLI3	GLI3	0
GLI3_Hand2_second_motif.jpwm|GLI3_Hand2_second_motif.jpwm|FF|5	38	100	9.93	2.98229	3.82679	9.41224	4.85687e-21	37	GLI3_Hand2_second_motif	GLI3_Hand2_second_motif	FF	5	GLI3	GLI3	0
GLI3_Hand2_second_motif.jpwm|GLI3_Hand2_second_motif.jpwm|FF|2	9	100	9.89	2.89861	0.91001	-0.307044	0.75881	9	GLI3_Hand2_second_motif	GLI3_Hand2_second_motif	FF	2	GLI3	GLI3	0
GLI3_Hand2_second_motif.jpwm|GLI3_Hand2_second_motif.jpwm|FF|3	8	100	9.97	3.38283	0.802407	-0.582353	0.560329	8	GLI3_Hand2_second_motif	GLI3_Hand2_second_motif	FF	3	GLI3	GLI3	0
GLI3_Hand2_second_motif.jpwm|GLI3_Hand2_second_motif.jpwm|FR|29	6	100	3.63	2.13983	1.65289	1.10756	0.268051	6	GLI3_Hand2_second_motif	GLI3_Hand2_second_motif	FR	29	GLI3	GLI3	0
GLI3_Hand2_second_motif.jpwm|GLI3_Hand2_second_motif.jpwm|FR|28	5	100	3.73	2.09306	1.34048	0.606767	0.544006	5	GLI3_Hand2_second_motif	GLI3_Hand2_second_motif	FR	28	GLI3	GLI3	0
GLI3_Hand2_second_motif.jpwm|GLI3_Hand2_second_motif.jpwm|FR|27	3	100	3.36	1.67284	0.892857	-0.215203	0.829609	3	GLI3_Hand2_second_motif	GLI3_Hand2_second_motif	FR	27	GLI3	GLI3	0
GLI3_Hand2_second_motif.jpwm|GLI3_Hand2_second_motif.jpwm|FR|26	3	100	3.67	1.89659	0.817439	-0.353265	0.72389	3	GLI3_Hand2_second_motif	GLI3_Hand2_second_motif	FR	26	GLI3	GLI3	0
GLI3_Hand2_second_motif.jpwm|GLI3_Hand2_second_motif.jpwm|FR|21	8	100	3.78	1.83996	2.1164	2.29353	0.0218177	8	GLI3_Hand2_second_motif	GLI3_Hand2_second_motif	FR	21	GLI3	GLI3	0
GLI3_Hand2_second_motif.jpwm|GLI3_Hand2_second_motif.jpwm|FR|20	7	100	3.33	1.96461	2.1021	1.86805	0.0617545	7	GLI3_Hand2_second_motif	GLI3_Hand2_second_motif	FR	20	GLI3	GLI3	0
GLI3_Hand2_second_motif.jpwm|GLI3_Hand2_second_motif.jpwm|FR|23	5	100	3.67	1.88591	1.3624	0.705229	0.480668	5	GLI3_Hand2_second_motif	GLI3_Hand2_second_motif	FR	23	GLI3	GLI3	0
GLI3_Hand2_second_motif.jpwm|GLI3_Hand2_second_motif.jpwm|FR|22	4	100	3.91	1.84279	1.02302	0.0488391	0.961048	4	GLI3_Hand2_second_motif	GLI3_Hand2_second_motif	FR	22	GLI3	GLI3	0
GLI3_Hand2_second_motif.jpwm|GLI3_Hand2_second_motif.jpwm|FR|33	13	100	3.54	1.87714	3.67232	5.03959	4.66519e-07	13	GLI3_Hand2_second_motif	GLI3_Hand2_second_motif	FR	33	GLI3	GLI3	0
GLI3_Hand2_second_motif.jpwm|GLI3_Hand2_second_motif.jpwm|FR|35	3	100	3.45	1.65983	0.869565	-0.271111	0.786305	3	GLI3_Hand2_second_motif	GLI3_Hand2_second_motif	FR	35	GLI3	GLI3	0
GLI3_Hand2_second_motif.jpwm|GLI3_Hand2_second_motif.jpwm|FR|38	2	100	3.7	1.69074	0.540541	-1.00548	0.314666	2	GLI3_Hand2_second_motif	GLI3_Hand2_second_motif	FR	38	GLI3	GLI3	0
GLI3_Hand2_second_motif.jpwm|GLI3_Hand2_second_motif.jpwm|FR|39	4	100	3.5	1.79505	1.14286	0.278543	0.780596	4	GLI3_Hand2_second_motif	GLI3_Hand2_second_motif	FR	39	GLI3	GLI3	0
GLI3_Hand2_second_motif.jpwm|GLI3_Hand2_second_motif.jpwm|FR|32	8	100	3.91	1.72969	2.04604	2.36459	0.0180501	8	GLI3_Hand2_second_motif	GLI3_Hand2_second_motif	FR	32	GLI3	GLI3	0
GLI3_Hand2_second_motif.jpwm|GLI3_Hand2_second_motif.jpwm|FR|30	4	100	3.61	1.84169	1.10803	0.211762	0.832293	4	GLI3_Hand2_second_motif	GLI3_Hand2_second_motif	FR	30	GLI3	GLI3	0
GLI3_Hand2_second_motif.jpwm|GLI3_Hand2_second_motif.jpwm|FR|31	1	100	3.81	2.08261	0.262467	-1.34927	0.177251	1	GLI3_Hand2_second_motif	GLI3_Hand2_second_motif	FR	31	GLI3	GLI3	0
GLI3_Hand2_second_motif.jpwm|GLI3_Hand2_second_motif.jpwm|FR|36	5	100	3.62	2.00394	1.38122	0.688645	0.491047	5	GLI3_Hand2_second_motif	GLI3_Hand2_second_motif	FR	36	GLI3	GLI3	0
GLI3_Hand2_second_motif.jpwm|GLI3_Hand2_second_motif.jpwm|FR|37	3	100	3.42	1.79888	0.877193	-0.233479	0.81539	3	GLI3_Hand2_second_motif	GLI3_Hand2_second_motif	FR	37	GLI3	GLI3	0
GLI3_Hand2_second_motif.jpwm|GLI3_Hand2_second_motif.jpwm|FR|34	4	100	3.45	1.87689	1.15942	0.293037	0.769493	4	GLI3_Hand2_second_motif	GLI3_Hand2_second_motif	FR	34	GLI3	GLI3	0
GLI3_Hand2_second_motif.jpwm|GLI3_Hand2_second_motif.jpwm|FF|62	12	100	8.72	3.21009	1.37615	1.02178	0.306885	12	GLI3_Hand2_second_motif	GLI3_Hand2_second_motif	FF	62	GLI3	GLI3	0
GLI3_Hand2_second_motif.jpwm|GLI3_Hand2_second_motif.jpwm|RF|88	2	100	3.5	1.78942	0.571429	-0.838261	0.401884	2	GLI3_Hand2_second_motif	GLI3_Hand2_second_motif	RF	88	GLI3	GLI3	0
GLI3_Hand2_second_motif.jpwm|GLI3_Hand2_second_motif.jpwm|RF|83	2	100	2.9	1.63608	0.689655	-0.550094	0.582255	2	GLI3_Hand2_second_motif	GLI3_Hand2_second_motif	RF	83	GLI3	GLI3	0
GLI3_Hand2_second_motif.jpwm|GLI3_Hand2_second_motif.jpwm|RF|82	3	100	3.33	1.99015	0.900901	-0.165816	0.868301	3	GLI3_Hand2_second_motif	GLI3_Hand2_second_motif	RF	82	GLI3	GLI3	0
GLI3_Hand2_second_motif.jpwm|GLI3_Hand2_second_motif.jpwm|RF|81	4	100	3.33	1.80938	1.2012	0.370294	0.711164	4	GLI3_Hand2_second_motif	GLI3_Hand2_second_motif	RF	81	GLI3	GLI3	0
GLI3_Hand2_second_motif.jpwm|GLI3_Hand2_second_motif.jpwm|RF|80	7	100	3.47	1.78351	2.01729	1.97924	0.0477887	7	GLI3_Hand2_second_motif	GLI3_Hand2_second_motif	RF	80	GLI3	GLI3	0
GLI3_Hand2_second_motif.jpwm|GLI3_Hand2_second_motif.jpwm|RF|87	3	100	2.99	1.58589	1.00334	0.0063056	0.994969	3	GLI3_Hand2_second_motif	GLI3_Hand2_second_motif	RF	87	GLI3	GLI3	0
GLI3_Hand2_second_motif.jpwm|GLI3_Hand2_second_motif.jpwm|RF|86	2	100	3.43	1.74226	0.58309	-0.820775	0.411774	2	GLI3_Hand2_second_motif	GLI3_Hand2_second_motif	RF	86	GLI3	GLI3	0
GLI3_Hand2_second_motif.jpwm|GLI3_Hand2_second_motif.jpwm|RF|85	5	100	3.28	1.70608	1.52439	1.00816	0.313378	5	GLI3_Hand2_second_motif	GLI3_Hand2_second_motif	RF	85	GLI3	GLI3	0
GLI3_Hand2_second_motif.jpwm|GLI3_Hand2_second_motif.jpwm|RF|84	5	100	3.44	1.67766	1.45349	0.929866	0.35244	5	GLI3_Hand2_second_motif	GLI3_Hand2_second_motif	RF	84	GLI3	GLI3	0
GLI3_Hand2_second_motif.jpwm|GLI3_Hand2_second_motif.jpwm|FR|82	2	100	3.33	1.76987	0.600601	-0.751469	0.45237	2	GLI3_Hand2_second_motif	GLI3_Hand2_second_motif	FR	82	GLI3	GLI3	0
GLI3_Hand2_second_motif.jpwm|GLI3_Hand2_second_motif.jpwm|FR|87	3	100	2.94	1.74553	1.02041	0.0343735	0.972579	3	GLI3_Hand2_second_motif	GLI3_Hand2_second_motif	FR	87	GLI3	GLI3	0
GLI3_Hand2_second_motif.jpwm|GLI3_Hand2_second_motif.jpwm|FR|84	3	100	3.52	1.74356	0.852273	-0.29824	0.76552	3	GLI3_Hand2_second_motif	GLI3_Hand2_second_motif	FR	84	GLI3	GLI3	0
GLI3_Hand2_second_motif.jpwm|GLI3_Hand2_second_motif.jpwm|FR|9	2	100	3.76	1.79292	0.531915	-0.981641	0.326277	2	GLI3_Hand2_second_motif	GLI3_Hand2_second_motif	FR	9	GLI3	GLI3	0
GLI3_Hand2_second_motif.jpwm|GLI3_Hand2_second_motif.jpwm|FR|7	6	100	3.9	2.08651	1.53846	1.00646	0.314192	6	GLI3_Hand2_second_motif	GLI3_Hand2_second_motif	FR	7	GLI3	GLI3	0
GLI3_Hand2_second_motif.jpwm|GLI3_Hand2_second_motif.jpwm|RF|98	1	100	3.06	1.80806	0.326797	-1.13934	0.254561	1	GLI3_Hand2_second_motif	GLI3_Hand2_second_motif	RF	98	GLI3	GLI3	0
GLI3_Hand2_second_motif.jpwm|GLI3_Hand2_second_motif.jpwm|RF|99	2	100	3.18	1.68403	0.628931	-0.7007	0.48349	2	GLI3_Hand2_second_motif	GLI3_Hand2_second_motif	RF	99	GLI3	GLI3	0
GLI3_Hand2_second_motif.jpwm|GLI3_Hand2_second_motif.jpwm|RF|90	6	100	3.37	1.69166	1.78042	1.55468	0.120021	6	GLI3_Hand2_second_motif	GLI3_Hand2_second_motif	RF	90	GLI3	GLI3	0
GLI3_Hand2_second_motif.jpwm|GLI3_Hand2_second_motif.jpwm|RF|91	2	100	3.03	1.57284	0.660066	-0.654865	0.512555	2	GLI3_Hand2_second_motif	GLI3_Hand2_second_motif	RF	91	GLI3	GLI3	0
GLI3_Hand2_second_motif.jpwm|GLI3_Hand2_second_motif.jpwm|RF|93	2	100	3.15	1.64762	0.634921	-0.697977	0.485191	2	GLI3_Hand2_second_motif	GLI3_Hand2_second_motif	RF	93	GLI3	GLI3	0
GLI3_Hand2_second_motif.jpwm|GLI3_Hand2_second_motif.jpwm|RF|94	5	100	3.47	1.96667	1.44092	0.777966	0.436589	5	GLI3_Hand2_second_motif	GLI3_Hand2_second_motif	RF	94	GLI3	GLI3	0
GLI3_Hand2_second_motif.jpwm|GLI3_Hand2_second_motif.jpwm|RF|95	4	100	2.58	1.50541	1.55039	0.943264	0.345546	4	GLI3_Hand2_second_motif	GLI3_Hand2_second_motif	RF	95	GLI3	GLI3	0
GLI3_Hand2_second_motif.jpwm|GLI3_Hand2_second_motif.jpwm|RF|96	7	100	2.96	1.71694	2.36486	2.35303	0.0186214	7	GLI3_Hand2_second_motif	GLI3_Hand2_second_motif	RF	96	GLI3	GLI3	0
GLI3_Hand2_second_motif.jpwm|GLI3_Hand2_second_motif.jpwm|RF|97	3	100	3.09	1.63358	0.970874	-0.0550937	0.956064	3	GLI3_Hand2_second_motif	GLI3_Hand2_second_motif	RF	97	GLI3	GLI3	0
GLI3_Hand2_second_motif.jpwm|GLI3_Hand2_second_motif.jpwm|RF|48	1	100	3.74	1.58031	0.26738	-1.73384	0.0829466	1	GLI3_Hand2_second_motif	GLI3_Hand2_second_motif	RF	48	GLI3	GLI3	0
GLI3_Hand2_second_motif.jpwm|GLI3_Hand2_second_motif.jpwm|FF|18	6	100	9.42	3.27889	0.636943	-1.04304	0.296931	6	GLI3_Hand2_second_motif	GLI3_Hand2_second_motif	FF	18	GLI3	GLI3	0
GLI3_Hand2_second_motif.jpwm|GLI3_Hand2_second_motif.jpwm|FF|19	5	100	9.24	2.88542	0.541126	-1.46946	0.141709	5	GLI3_Hand2_second_motif	GLI3_Hand2_second_motif	FF	19	GLI3	GLI3	0
GLI3_Hand2_second_motif.jpwm|GLI3_Hand2_second_motif.jpwm|FF|14	8	100	9.78	3.37124	0.817996	-0.527996	0.597502	8	GLI3_Hand2_second_motif	GLI3_Hand2_second_motif	FF	14	GLI3	GLI3	0
GLI3_Hand2_second_motif.jpwm|GLI3_Hand2_second_motif.jpwm|FF|15	10	100	9.76	3.4819	1.02459	0.0689279	0.945047	10	GLI3_Hand2_second_motif	GLI3_Hand2_second_motif	FF	15	GLI3	GLI3	0
GLI3_Hand2_second_motif.jpwm|GLI3_Hand2_second_motif.jpwm|FF|16	12	100	9.75	3.09896	1.23077	0.726051	0.467808	12	GLI3_Hand2_second_motif	GLI3_Hand2_second_motif	FF	16	GLI3	GLI3	0
GLI3_Hand2_second_motif.jpwm|GLI3_Hand2_second_motif.jpwm|FF|17	13	100	10.06	3.23435	1.29225	0.908993	0.363354	13	GLI3_Hand2_second_motif	GLI3_Hand2_second_motif	FF	17	GLI3	GLI3	0
GLI3_Hand2_second_motif.jpwm|GLI3_Hand2_second_motif.jpwm|FF|10	23	100	10.17	3.36066	2.26155	3.8177	0.000134701	23	GLI3_Hand2_second_motif	GLI3_Hand2_second_motif	FF	10	GLI3	GLI3	0
GLI3_Hand2_second_motif.jpwm|GLI3_Hand2_second_motif.jpwm|FF|11	16	100	9.63	3.1226	1.66147	2.03997	0.0413534	16	GLI3_Hand2_second_motif	GLI3_Hand2_second_motif	FF	11	GLI3	GLI3	0
GLI3_Hand2_second_motif.jpwm|GLI3_Hand2_second_motif.jpwm|FF|12	32	100	9.46	3.00982	3.38266	7.48883	6.94898e-14	32	GLI3_Hand2_second_motif	GLI3_Hand2_second_motif	FF	12	GLI3	GLI3	0
GLI3_Hand2_second_motif.jpwm|GLI3_Hand2_second_motif.jpwm|FF|13	16	100	9.53	2.81215	1.67891	2.30073	0.0214068	16	GLI3_Hand2_second_motif	GLI3_Hand2_second_motif	FF	13	GLI3	GLI3	0
GLI3_Hand2_second_motif.jpwm|GLI3_Hand2_second_motif.jpwm|RF|49	1	100	3.49	1.54066	0.286533	-1.61619	0.106053	1	GLI3_Hand2_second_motif	GLI3_Hand2_second_motif	RF	49	GLI3	GLI3	0
GLI3_Hand2_second_motif.jpwm|GLI3_Hand2_second_motif.jpwm|RF|47	4	100	3.66	1.93438	1.0929	0.175767	0.860477	4	GLI3_Hand2_second_motif	GLI3_Hand2_second_motif	RF	47	GLI3	GLI3	0
GLI3_Hand2_second_motif.jpwm|GLI3_Hand2_second_motif.jpwm|RF|46	5	100	3.71	1.94518	1.34771	0.663177	0.507217	5	GLI3_Hand2_second_motif	GLI3_Hand2_second_motif	RF	46	GLI3	GLI3	0
GLI3_Hand2_second_motif.jpwm|GLI3_Hand2_second_motif.jpwm|RF|45	6	100	3.72	2.16529	1.6129	1.05298	0.292352	6	GLI3_Hand2_second_motif	GLI3_Hand2_second_motif	RF	45	GLI3	GLI3	0
GLI3_Hand2_second_motif.jpwm|GLI3_Hand2_second_motif.jpwm|RF|44	7	100	4.05	1.76025	1.7284	1.6759	0.0937584	7	GLI3_Hand2_second_motif	GLI3_Hand2_second_motif	RF	44	GLI3	GLI3	0
GLI3_Hand2_second_motif.jpwm|GLI3_Hand2_second_motif.jpwm|RF|43	4	100	4.01	2.0025	0.997506	-0.00499376	0.996016	4	GLI3_Hand2_second_motif	GLI3_Hand2_second_motif	RF	43	GLI3	GLI3	0
GLI3_Hand2_second_motif.jpwm|GLI3_Hand2_second_motif.jpwm|RF|42	16	100	3.59	2.1182	4.45682	5.85875	4.66363e-09	16	GLI3_Hand2_second_motif	GLI3_Hand2_second_motif	RF	42	GLI3	GLI3	0
GLI3_Hand2_second_motif.jpwm|GLI3_Hand2_second_motif.jpwm|RF|41	1	100	3.79	1.89254	0.263852	-1.47421	0.140426	1	GLI3_Hand2_second_motif	GLI3_Hand2_second_motif	RF	41	GLI3	GLI3	0
GLI3_Hand2_second_motif.jpwm|GLI3_Hand2_second_motif.jpwm|RF|40	7	100	3.31	2.14944	2.1148	1.71672	0.0860295	7	GLI3_Hand2_second_motif	GLI3_Hand2_second_motif	RF	40	GLI3	GLI3	0
GLI3_Hand2_second_motif.jpwm|GLI3_Hand2_second_motif.jpwm|FF|29	19	100	9.04	2.85657	2.10177	3.4867	0.000489024	19	GLI3_Hand2_second_motif	GLI3_Hand2_second_motif	FF	29	GLI3	GLI3	0
GLI3_Hand2_second_motif.jpwm|GLI3_Hand2_second_motif.jpwm|FF|28	12	100	9.31	3.27431	1.28894	0.821547	0.411335	12	GLI3_Hand2_second_motif	GLI3_Hand2_second_motif	FF	28	GLI3	GLI3	0
GLI3_Hand2_second_motif.jpwm|GLI3_Hand2_second_motif.jpwm|FF|21	6	100	9.46	3.20801	0.634249	-1.07855	0.280788	5	GLI3_Hand2_second_motif	GLI3_Hand2_second_motif	FF	21	GLI3	GLI3	0
GLI3_Hand2_second_motif.jpwm|GLI3_Hand2_second_motif.jpwm|FF|22	8	100	9.46	3.1186	0.845666	-0.468159	0.639671	8	GLI3_Hand2_second_motif	GLI3_Hand2_second_motif	FF	22	GLI3	GLI3	0
GLI3_Hand2_second_motif.jpwm|GLI3_Hand2_second_motif.jpwm|FF|25	22	100	9.48	2.87616	2.32068	4.35302	1.34275e-05	16	GLI3_Hand2_second_motif	GLI3_Hand2_second_motif	FF	25	GLI3	GLI3	0
GLI3_Hand2_second_motif.jpwm|GLI3_Hand2_second_motif.jpwm|FF|24	6	100	9.72	3.0487	0.617284	-1.22019	0.222391	6	GLI3_Hand2_second_motif	GLI3_Hand2_second_motif	FF	24	GLI3	GLI3	0
GLI3_Hand2_second_motif.jpwm|GLI3_Hand2_second_motif.jpwm|RF|58	4	100	3.24	1.96495	1.23457	0.386779	0.69892	4	GLI3_Hand2_second_motif	GLI3_Hand2_second_motif	RF	58	GLI3	GLI3	0
GLI3_Hand2_second_motif.jpwm|GLI3_Hand2_second_motif.jpwm|RF|59	3	100	3.55	1.77169	0.84507	-0.310438	0.756228	3	GLI3_Hand2_second_motif	GLI3_Hand2_second_motif	RF	59	GLI3	GLI3	0
GLI3_Hand2_second_motif.jpwm|GLI3_Hand2_second_motif.jpwm|RF|55	1	100	3.24	1.8484	0.308642	-1.21186	0.225565	1	GLI3_Hand2_second_motif	GLI3_Hand2_second_motif	RF	55	GLI3	GLI3	0
GLI3_Hand2_second_motif.jpwm|GLI3_Hand2_second_motif.jpwm|RF|56	3	100	3.52	1.96165	0.852273	-0.265083	0.790946	3	GLI3_Hand2_second_motif	GLI3_Hand2_second_motif	RF	56	GLI3	GLI3	0
GLI3_Hand2_second_motif.jpwm|GLI3_Hand2_second_motif.jpwm|RF|57	1	100	3.62	1.92684	0.276243	-1.35974	0.173913	1	GLI3_Hand2_second_motif	GLI3_Hand2_second_motif	RF	57	GLI3	GLI3	0
GLI3_Hand2_second_motif.jpwm|GLI3_Hand2_second_motif.jpwm|RF|50	4	100	3.76	2.07982	1.06383	0.115395	0.908132	4	GLI3_Hand2_second_motif	GLI3_Hand2_second_motif	RF	50	GLI3	GLI3	0
GLI3_Hand2_second_motif.jpwm|GLI3_Hand2_second_motif.jpwm|RF|51	3	100	3.36	1.89907	0.892857	-0.189567	0.849649	3	GLI3_Hand2_second_motif	GLI3_Hand2_second_motif	RF	51	GLI3	GLI3	0
GLI3_Hand2_second_motif.jpwm|GLI3_Hand2_second_motif.jpwm|RF|52	10	100	3.25	1.83333	3.07692	3.68182	0.000231577	10	GLI3_Hand2_second_motif	GLI3_Hand2_second_motif	RF	52	GLI3	GLI3	0
GLI3_Hand2_second_motif.jpwm|GLI3_Hand2_second_motif.jpwm|RF|53	6	100	3.51	1.83949	1.7094	1.35363	0.175853	6	GLI3_Hand2_second_motif	GLI3_Hand2_second_motif	RF	53	GLI3	GLI3	0
GLI3_Hand2_second_motif.jpwm|GLI3_Hand2_second_motif.jpwm|FR|-4	3	100	8.35	2.8369	0.359281	-1.88586	0.0593133	3	GLI3_Hand2_second_motif	GLI3_Hand2_second_motif	FR	-4	GLI3	GLI3	0
GLI3_Hand2_second_motif.jpwm|GLI3_Hand2_second_motif.jpwm|FR|-5	13	100	27.74	5.70419	0.468637	-2.58407	0.00976432	13	GLI3_Hand2_second_motif	GLI3_Hand2_second_motif	FR	-5	GLI3	GLI3	0
GLI3_Hand2_second_motif.jpwm|GLI3_Hand2_second_motif.jpwm|FR|-1	3	100	3.83	1.92828	0.78329	-0.430434	0.66688	3	GLI3_Hand2_second_motif	GLI3_Hand2_second_motif	FR	-1	GLI3	GLI3	0
GLI3_Hand2_second_motif.jpwm|GLI3_Hand2_second_motif.jpwm|FR|-2	2	100	0.85	0.857233	2.35294	1.34153	0.17975	2	GLI3_Hand2_second_motif	GLI3_Hand2_second_motif	FR	-2	GLI3	GLI3	0
GLI3_Hand2_second_motif.jpwm|GLI3_Hand2_second_motif.jpwm|FR|-3	2	100	1.78	1.25995	1.1236	0.17461	0.861386	2	GLI3_Hand2_second_motif	GLI3_Hand2_second_motif	FR	-3	GLI3	GLI3	0
GLI3_Hand2_second_motif.jpwm|GLI3_Hand2_second_motif.jpwm|FF|97	5	100	8.18	2.78662	0.611247	-1.14117	0.2538	5	GLI3_Hand2_second_motif	GLI3_Hand2_second_motif	FF	97	GLI3	GLI3	0
GLI3_Hand2_second_motif.jpwm|GLI3_Hand2_second_motif.jpwm|FF|36	11	100	9.04	3.00478	1.21681	0.652295	0.514211	11	GLI3_Hand2_second_motif	GLI3_Hand2_second_motif	FF	36	GLI3	GLI3	0
GLI3_Hand2_second_motif.jpwm|GLI3_Hand2_second_motif.jpwm|FF|37	9	100	8.75	2.93834	1.02857	0.0850821	0.932196	9	GLI3_Hand2_second_motif	GLI3_Hand2_second_motif	FF	37	GLI3	GLI3	0
GLI3_Hand2_second_motif.jpwm|GLI3_Hand2_second_motif.jpwm|FF|32	13	100	9.15	3.25786	1.42077	1.18176	0.237302	13	GLI3_Hand2_second_motif	GLI3_Hand2_second_motif	FF	32	GLI3	GLI3	0
GLI3_Hand2_second_motif.jpwm|GLI3_Hand2_second_motif.jpwm|FF|31	12	100	8.87	3.16437	1.35287	0.989139	0.322595	12	GLI3_Hand2_second_motif	GLI3_Hand2_second_motif	FF	31	GLI3	GLI3	0
GLI3_Hand2_second_motif.jpwm|GLI3_Hand2_second_motif.jpwm|FF|38	7	100	8.8	2.90941	0.795455	-0.618683	0.536125	7	GLI3_Hand2_second_motif	GLI3_Hand2_second_motif	FF	38	GLI3	GLI3	0
GLI3_Hand2_second_motif.jpwm|GLI3_Hand2_second_motif.jpwm|FF|39	12	100	9.27	2.79558	1.2945	0.976542	0.328796	12	GLI3_Hand2_second_motif	GLI3_Hand2_second_motif	FF	39	GLI3	GLI3	0
GLI3_Hand2_second_motif.jpwm|GLI3_Hand2_second_motif.jpwm|FF|20	19	100	9.89	3.2095	1.92113	2.83845	0.00453338	19	GLI3_Hand2_second_motif	GLI3_Hand2_second_motif	FF	20	GLI3	GLI3	0
GLI3_Hand2_second_motif.jpwm|GLI3_Hand2_second_motif.jpwm|FF|23	13	100	8.87	2.98025	1.46561	1.38579	0.165812	13	GLI3_Hand2_second_motif	GLI3_Hand2_second_motif	FF	23	GLI3	GLI3	0
GLI3_Hand2_second_motif.jpwm|GLI3_Hand2_second_motif.jpwm|FF|27	10	100	9.39	2.86002	1.06496	0.213285	0.831104	10	GLI3_Hand2_second_motif	GLI3_Hand2_second_motif	FF	27	GLI3	GLI3	0
GLI3_Hand2_second_motif.jpwm|GLI3_Hand2_second_motif.jpwm|RF|69	5	100	3.73	2.03433	1.34048	0.624285	0.53244	5	GLI3_Hand2_second_motif	GLI3_Hand2_second_motif	RF	69	GLI3	GLI3	0
GLI3_Hand2_second_motif.jpwm|GLI3_Hand2_second_motif.jpwm|RF|68	2	100	3.46	1.73741	0.578035	-0.840332	0.400722	2	GLI3_Hand2_second_motif	GLI3_Hand2_second_motif	RF	68	GLI3	GLI3	0
GLI3_Hand2_second_motif.jpwm|GLI3_Hand2_second_motif.jpwm|RF|61	8	100	3.29	1.85481	2.43161	2.53935	0.0111059	8	GLI3_Hand2_second_motif	GLI3_Hand2_second_motif	RF	61	GLI3	GLI3	0
GLI3_Hand2_second_motif.jpwm|GLI3_Hand2_second_motif.jpwm|RF|60	6	100	3.46	1.6107	1.7341	1.57696	0.114805	6	GLI3_Hand2_second_motif	GLI3_Hand2_second_motif	RF	60	GLI3	GLI3	0
GLI3_Hand2_second_motif.jpwm|GLI3_Hand2_second_motif.jpwm|RF|63	5	100	3.35	1.83883	1.49254	0.897307	0.369555	5	GLI3_Hand2_second_motif	GLI3_Hand2_second_motif	RF	63	GLI3	GLI3	0
GLI3_Hand2_second_motif.jpwm|GLI3_Hand2_second_motif.jpwm|RF|62	3	100	3.55	2.09557	0.84507	-0.262458	0.792968	3	GLI3_Hand2_second_motif	GLI3_Hand2_second_motif	RF	62	GLI3	GLI3	0
GLI3_Hand2_second_motif.jpwm|GLI3_Hand2_second_motif.jpwm|RF|65	2	100	3.19	1.80736	0.626959	-0.658417	0.51027	2	GLI3_Hand2_second_motif	GLI3_Hand2_second_motif	RF	65	GLI3	GLI3	0
GLI3_Hand2_second_motif.jpwm|GLI3_Hand2_second_motif.jpwm|RF|64	3	100	3.46	1.82806	0.867052	-0.251632	0.801325	3	GLI3_Hand2_second_motif	GLI3_Hand2_second_motif	RF	64	GLI3	GLI3	0
GLI3_Hand2_second_motif.jpwm|GLI3_Hand2_second_motif.jpwm|RF|67	4	100	3.44	1.79966	1.16279	0.311169	0.755672	4	GLI3_Hand2_second_motif	GLI3_Hand2_second_motif	RF	67	GLI3	GLI3	0
GLI3_Hand2_second_motif.jpwm|GLI3_Hand2_second_motif.jpwm|RF|66	4	100	3.24	1.85929	1.23457	0.408758	0.682718	4	GLI3_Hand2_second_motif	GLI3_Hand2_second_motif	RF	66	GLI3	GLI3	0
GLI3_Hand2_second_motif.jpwm|GLI3_Hand2_second_motif.jpwm|FR|89	3	100	3.28	1.96474	0.914634	-0.142513	0.886675	3	GLI3_Hand2_second_motif	GLI3_Hand2_second_motif	FR	89	GLI3	GLI3	0
GLI3_Hand2_second_motif.jpwm|GLI3_Hand2_second_motif.jpwm|FR|88	3	100	3.01	1.77807	0.996678	-0.00562409	0.995513	3	GLI3_Hand2_second_motif	GLI3_Hand2_second_motif	FR	88	GLI3	GLI3	0
GLI3_Hand2_second_motif.jpwm|GLI3_Hand2_second_motif.jpwm|FR|83	6	100	3.43	1.91883	1.74927	1.33936	0.180455	5	GLI3_Hand2_second_motif	GLI3_Hand2_second_motif	FR	83	GLI3	GLI3	0
GLI3_Hand2_second_motif.jpwm|GLI3_Hand2_second_motif.jpwm|FR|81	3	100	3.12	2.04139	0.961538	-0.0587835	0.953125	3	GLI3_Hand2_second_motif	GLI3_Hand2_second_motif	FR	81	GLI3	GLI3	0
GLI3_Hand2_second_motif.jpwm|GLI3_Hand2_second_motif.jpwm|FR|80	2	100	3.3	1.6299	0.606061	-0.797596	0.425105	2	GLI3_Hand2_second_motif	GLI3_Hand2_second_motif	FR	80	GLI3	GLI3	0
GLI3_Hand2_second_motif.jpwm|GLI3_Hand2_second_motif.jpwm|FR|86	2	100	3.22	1.88337	0.621118	-0.647776	0.51713	2	GLI3_Hand2_second_motif	GLI3_Hand2_second_motif	FR	86	GLI3	GLI3	0
GLI3_Hand2_second_motif.jpwm|GLI3_Hand2_second_motif.jpwm|FR|85	6	100	2.85	1.70783	2.10526	1.84445	0.0651174	6	GLI3_Hand2_second_motif	GLI3_Hand2_second_motif	FR	85	GLI3	GLI3	0
GLI3_Hand2_second_motif.jpwm|GLI3_Hand2_second_motif.jpwm|FF|100	11	100	8.2	3.18139	1.34146	0.88012	0.378794	11	GLI3_Hand2_second_motif	GLI3_Hand2_second_motif	FF	100	GLI3	GLI3	0
GLI3_Hand2_second_motif.jpwm|GLI3_Hand2_second_motif.jpwm|FF|43	7	100	8.68	3.10386	0.806452	-0.541262	0.588327	7	GLI3_Hand2_second_motif	GLI3_Hand2_second_motif	FF	43	GLI3	GLI3	0
GLI3_Hand2_second_motif.jpwm|GLI3_Hand2_second_motif.jpwm|FF|42	7	100	8.69	3.1485	0.805524	-0.536764	0.591431	7	GLI3_Hand2_second_motif	GLI3_Hand2_second_motif	FF	42	GLI3	GLI3	0
GLI3_Hand2_second_motif.jpwm|GLI3_Hand2_second_motif.jpwm|FF|41	8	100	9.91	3.55646	0.807265	-0.537051	0.591232	8	GLI3_Hand2_second_motif	GLI3_Hand2_second_motif	FF	41	GLI3	GLI3	0
GLI3_Hand2_second_motif.jpwm|GLI3_Hand2_second_motif.jpwm|FF|40	8	100	8.92	2.73282	0.896861	-0.336649	0.736381	8	GLI3_Hand2_second_motif	GLI3_Hand2_second_motif	FF	40	GLI3	GLI3	0
GLI3_Hand2_second_motif.jpwm|GLI3_Hand2_second_motif.jpwm|FF|47	7	100	9.14	2.906	0.765864	-0.736407	0.461483	7	GLI3_Hand2_second_motif	GLI3_Hand2_second_motif	FF	47	GLI3	GLI3	0
GLI3_Hand2_second_motif.jpwm|GLI3_Hand2_second_motif.jpwm|FF|46	5	100	9.13	2.96326	0.547645	-1.39374	0.163398	5	GLI3_Hand2_second_motif	GLI3_Hand2_second_motif	FF	46	GLI3	GLI3	0
GLI3_Hand2_second_motif.jpwm|GLI3_Hand2_second_motif.jpwm|FF|45	7	100	9.51	3.00335	0.736067	-0.835734	0.403305	7	GLI3_Hand2_second_motif	GLI3_Hand2_second_motif	FF	45	GLI3	GLI3	0
GLI3_Hand2_second_motif.jpwm|GLI3_Hand2_second_motif.jpwm|FF|44	7	100	8.47	2.79051	0.826446	-0.526785	0.598343	7	GLI3_Hand2_second_motif	GLI3_Hand2_second_motif	FF	44	GLI3	GLI3	0
GLI3_Hand2_second_motif.jpwm|GLI3_Hand2_second_motif.jpwm|FF|49	15	100	8.97	2.75774	1.67224	2.18657	0.0287739	15	GLI3_Hand2_second_motif	GLI3_Hand2_second_motif	FF	49	GLI3	GLI3	0
GLI3_Hand2_second_motif.jpwm|GLI3_Hand2_second_motif.jpwm|FF|48	8	100	9.71	2.91043	0.823893	-0.587542	0.55684	8	GLI3_Hand2_second_motif	GLI3_Hand2_second_motif	FF	48	GLI3	GLI3	0
GLI3_Hand2_second_motif.jpwm|GLI3_Hand2_second_motif.jpwm|RF|100	6	100	3.42	1.97039	1.75439	1.30939	0.190403	6	GLI3_Hand2_second_motif	GLI3_Hand2_second_motif	RF	100	GLI3	GLI3	0
GLI3_Hand2_second_motif.jpwm|GLI3_Hand2_second_motif.jpwm|RF|76	4	100	3.71	1.97609	1.07817	0.146754	0.883326	4	GLI3_Hand2_second_motif	GLI3_Hand2_second_motif	RF	76	GLI3	GLI3	0
GLI3_Hand2_second_motif.jpwm|GLI3_Hand2_second_motif.jpwm|RF|77	4	100	3.55	2.00189	1.12676	0.224787	0.822145	4	GLI3_Hand2_second_motif	GLI3_Hand2_second_motif	RF	77	GLI3	GLI3	0
GLI3_Hand2_second_motif.jpwm|GLI3_Hand2_second_motif.jpwm|RF|74	4	100	3.28	1.72375	1.21951	0.417694	0.676171	4	GLI3_Hand2_second_motif	GLI3_Hand2_second_motif	RF	74	GLI3	GLI3	0
GLI3_Hand2_second_motif.jpwm|GLI3_Hand2_second_motif.jpwm|RF|75	4	100	3.13	1.80714	1.27796	0.481423	0.630216	4	GLI3_Hand2_second_motif	GLI3_Hand2_second_motif	RF	75	GLI3	GLI3	0
GLI3_Hand2_second_motif.jpwm|GLI3_Hand2_second_motif.jpwm|RF|72	5	100	3.14	1.78671	1.59236	1.04102	0.297866	5	GLI3_Hand2_second_motif	GLI3_Hand2_second_motif	RF	72	GLI3	GLI3	0
GLI3_Hand2_second_motif.jpwm|GLI3_Hand2_second_motif.jpwm|RF|73	5	100	3.36	1.77252	1.4881	0.925238	0.354842	5	GLI3_Hand2_second_motif	GLI3_Hand2_second_motif	RF	73	GLI3	GLI3	0
GLI3_Hand2_second_motif.jpwm|GLI3_Hand2_second_motif.jpwm|RF|70	7	100	3.32	1.76315	2.10843	2.08718	0.0368721	7	GLI3_Hand2_second_motif	GLI3_Hand2_second_motif	RF	70	GLI3	GLI3	0
GLI3_Hand2_second_motif.jpwm|GLI3_Hand2_second_motif.jpwm|RF|71	3	100	3.12	1.67742	0.961538	-0.0715384	0.942969	3	GLI3_Hand2_second_motif	GLI3_Hand2_second_motif	RF	71	GLI3	GLI3	0
GLI3_Hand2_second_motif.jpwm|GLI3_Hand2_second_motif.jpwm|RF|78	3	100	3.47	1.82826	0.864553	-0.257075	0.797121	3	GLI3_Hand2_second_motif	GLI3_Hand2_second_motif	RF	78	GLI3	GLI3	0
GLI3_Hand2_second_motif.jpwm|GLI3_Hand2_second_motif.jpwm|RF|79	3	100	3.36	1.76681	0.892857	-0.203757	0.838543	3	GLI3_Hand2_second_motif	GLI3_Hand2_second_motif	RF	79	GLI3	GLI3	0
GLI3_Hand2_third_motif.jpwm|GLI3_Hand2_second_motif.jpwm|FF|78	2	100	1.95	1.30558	1.02564	0.0382971	0.969451	2	GLI3_Hand2_third_motif	GLI3_Hand2_second_motif	FF	78	GLI3	GLI3	0
GLI3_Hand2_third_motif.jpwm|GLI3_Hand2_second_motif.jpwm|FF|79	4	100	1.8	1.19764	2.22222	1.83694	0.066218	4	GLI3_Hand2_third_motif	GLI3_Hand2_second_motif	FF	79	GLI3	GLI3	0
GLI3_Hand2_third_motif.jpwm|GLI3_Hand2_second_motif.jpwm|FF|70	1	100	1.89	1.22181	0.529101	-0.728425	0.466353	1	GLI3_Hand2_third_motif	GLI3_Hand2_second_motif	FF	70	GLI3	GLI3	0
GLI3_Hand2_third_motif.jpwm|GLI3_Hand2_second_motif.jpwm|FF|72	3	100	1.87	1.22808	1.60428	0.920135	0.357502	3	GLI3_Hand2_third_motif	GLI3_Hand2_second_motif	FF	72	GLI3	GLI3	0
GLI3_Hand2_third_motif.jpwm|GLI3_Hand2_second_motif.jpwm|FF|73	3	100	2.06	1.30902	1.45631	0.718094	0.472699	3	GLI3_Hand2_third_motif	GLI3_Hand2_second_motif	FF	73	GLI3	GLI3	0
GLI3_Hand2_third_motif.jpwm|GLI3_Hand2_second_motif.jpwm|FF|74	5	100	2.09	1.55112	2.39234	1.87607	0.0606458	5	GLI3_Hand2_third_motif	GLI3_Hand2_second_motif	FF	74	GLI3	GLI3	0
GLI3_Hand2_third_motif.jpwm|GLI3_Hand2_second_motif.jpwm|FF|75	4	100	2.02	1.5307	1.9802	1.29353	0.195828	4	GLI3_Hand2_third_motif	GLI3_Hand2_second_motif	FF	75	GLI3	GLI3	0
GLI3_Hand2_third_motif.jpwm|GLI3_Hand2_second_motif.jpwm|FF|76	3	100	1.77	1.39881	1.69492	0.879319	0.379228	3	GLI3_Hand2_third_motif	GLI3_Hand2_second_motif	FF	76	GLI3	GLI3	0
GLI3_Hand2_third_motif.jpwm|GLI3_Hand2_second_motif.jpwm|FF|77	1	100	2.12	1.77684	0.471698	-0.630331	0.528478	1	GLI3_Hand2_third_motif	GLI3_Hand2_second_motif	FF	77	GLI3	GLI3	0
GLI3_Hand2_third_motif.jpwm|GLI3_Hand2_second_motif.jpwm|FF|67	5	100	2	1.54397	2.5	1.94304	0.0520107	5	GLI3_Hand2_third_motif	GLI3_Hand2_second_motif	FF	67	GLI3	GLI3	0
GLI3_Hand2_third_motif.jpwm|GLI3_Hand2_second_motif.jpwm|FF|66	5	100	1.96	1.3701	2.55102	2.21882	0.0264991	5	GLI3_Hand2_third_motif	GLI3_Hand2_second_motif	FF	66	GLI3	GLI3	0
GLI3_Hand2_third_motif.jpwm|GLI3_Hand2_second_motif.jpwm|FF|65	4	100	2.08	1.42616	1.92308	1.34627	0.178215	4	GLI3_Hand2_third_motif	GLI3_Hand2_second_motif	FF	65	GLI3	GLI3	0
GLI3_Hand2_third_motif.jpwm|GLI3_Hand2_second_motif.jpwm|FF|64	6	100	1.87	1.3231	3.20856	3.12145	0.00179965	6	GLI3_Hand2_third_motif	GLI3_Hand2_second_motif	FF	64	GLI3	GLI3	0
GLI3_Hand2_third_motif.jpwm|GLI3_Hand2_second_motif.jpwm|FF|63	1	100	1.59	1.18146	0.628931	-0.49938	0.617512	1	GLI3_Hand2_third_motif	GLI3_Hand2_second_motif	FF	63	GLI3	GLI3	0
GLI3_Hand2_third_motif.jpwm|GLI3_Hand2_second_motif.jpwm|FF|61	1	100	1.9	1.51424	0.526316	-0.594357	0.552274	1	GLI3_Hand2_third_motif	GLI3_Hand2_second_motif	FF	61	GLI3	GLI3	0
GLI3_Hand2_third_motif.jpwm|GLI3_Hand2_second_motif.jpwm|FF|60	2	100	1.91	1.37873	1.04712	0.0652772	0.947953	2	GLI3_Hand2_third_motif	GLI3_Hand2_second_motif	FF	60	GLI3	GLI3	0
GLI3_Hand2_third_motif.jpwm|GLI3_Hand2_second_motif.jpwm|FF|12	4	100	2.13	1.62465	1.87793	1.15102	0.249726	4	GLI3_Hand2_third_motif	GLI3_Hand2_second_motif	FF	12	GLI3	GLI3	0
GLI3_Hand2_third_motif.jpwm|GLI3_Hand2_second_motif.jpwm|FF|13	2	100	2.21	1.2972	0.904977	-0.161887	0.871395	2	GLI3_Hand2_third_motif	GLI3_Hand2_second_motif	FF	13	GLI3	GLI3	0
GLI3_Hand2_third_motif.jpwm|GLI3_Hand2_second_motif.jpwm|FF|11	2	100	2.32	1.65071	0.862069	-0.193856	0.846289	2	GLI3_Hand2_third_motif	GLI3_Hand2_second_motif	FF	11	GLI3	GLI3	0
GLI3_Hand2_third_motif.jpwm|GLI3_Hand2_second_motif.jpwm|FF|16	5	100	2.32	1.77457	2.15517	1.51023	0.130986	5	GLI3_Hand2_third_motif	GLI3_Hand2_second_motif	FF	16	GLI3	GLI3	0
GLI3_Hand2_third_motif.jpwm|GLI3_Hand2_second_motif.jpwm|FF|14	1	100	2.35	1.56589	0.425532	-0.862128	0.388617	1	GLI3_Hand2_third_motif	GLI3_Hand2_second_motif	FF	14	GLI3	GLI3	0
GLI3_Hand2_third_motif.jpwm|GLI3_Hand2_second_motif.jpwm|FF|15	2	100	2.11	1.28625	0.947867	-0.0855198	0.931848	2	GLI3_Hand2_third_motif	GLI3_Hand2_second_motif	FF	15	GLI3	GLI3	0
GLI3_Hand2_third_motif.jpwm|GLI3_Hand2_second_motif.jpwm|FF|18	2	100	2.01	1.45293	0.995025	-0.00688264	0.994508	2	GLI3_Hand2_third_motif	GLI3_Hand2_second_motif	FF	18	GLI3	GLI3	0
GLI3_Hand2_third_motif.jpwm|GLI3_Hand2_second_motif.jpwm|FF|19	1	100	2.22	1.58643	0.45045	-0.769021	0.441881	1	GLI3_Hand2_third_motif	GLI3_Hand2_second_motif	FF	19	GLI3	GLI3	0
GLI3_Hand2_third_motif.jpwm|GLI3_Hand2_second_motif.jpwm|FF|10	1	100	2.15	1.56589	0.465116	-0.734405	0.462702	1	GLI3_Hand2_third_motif	GLI3_Hand2_second_motif	FF	10	GLI3	GLI3	0
GLI3_Hand2_third_motif.jpwm|GLI3_Hand2_second_motif.jpwm|FF|39	4	100	2.19	1.65569	1.82648	1.0932	0.274306	4	GLI3_Hand2_third_motif	GLI3_Hand2_second_motif	FF	39	GLI3	GLI3	0
GLI3_Hand2_third_motif.jpwm|GLI3_Hand2_second_motif.jpwm|FF|34	3	100	2.14	1.37084	1.40187	0.627354	0.530427	3	GLI3_Hand2_third_motif	GLI3_Hand2_second_motif	FF	34	GLI3	GLI3	0
GLI3_Hand2_third_motif.jpwm|GLI3_Hand2_second_motif.jpwm|FF|35	2	100	1.82	1.42404	1.0989	0.126401	0.899414	2	GLI3_Hand2_third_motif	GLI3_Hand2_second_motif	FF	35	GLI3	GLI3	0
GLI3_Hand2_third_motif.jpwm|GLI3_Hand2_second_motif.jpwm|FF|36	3	100	2.07	1.40888	1.44928	0.660098	0.509191	3	GLI3_Hand2_third_motif	GLI3_Hand2_second_motif	FF	36	GLI3	GLI3	0
GLI3_Hand2_third_motif.jpwm|GLI3_Hand2_second_motif.jpwm|FF|37	4	100	1.98	1.39971	2.0202	1.44315	0.148977	4	GLI3_Hand2_third_motif	GLI3_Hand2_second_motif	FF	37	GLI3	GLI3	0
GLI3_Hand2_third_motif.jpwm|GLI3_Hand2_second_motif.jpwm|FF|30	5	100	2.2	1.31809	2.27273	2.12428	0.0336469	5	GLI3_Hand2_third_motif	GLI3_Hand2_second_motif	FF	30	GLI3	GLI3	0
GLI3_Hand2_third_motif.jpwm|GLI3_Hand2_second_motif.jpwm|FF|31	4	100	2.18	1.50675	1.83486	1.2079	0.227087	4	GLI3_Hand2_third_motif	GLI3_Hand2_second_motif	FF	31	GLI3	GLI3	0
GLI3_Hand2_third_motif.jpwm|GLI3_Hand2_second_motif.jpwm|FF|32	4	100	2.11	1.58844	1.89573	1.18985	0.234106	4	GLI3_Hand2_third_motif	GLI3_Hand2_second_motif	FF	32	GLI3	GLI3	0
GLI3_Hand2_third_motif.jpwm|GLI3_Hand2_second_motif.jpwm|FF|33	4	100	1.88	1.44446	2.12766	1.46768	0.142192	4	GLI3_Hand2_third_motif	GLI3_Hand2_second_motif	FF	33	GLI3	GLI3	0
GLI3_Hand2_third_motif.jpwm|GLI3_Hand2_second_motif.jpwm|FF|-1	2	100	3.23	1.95327	0.619195	-0.629714	0.528882	2	GLI3_Hand2_third_motif	GLI3_Hand2_second_motif	FF	-1	GLI3	GLI3	0
GLI3_Hand2_third_motif.jpwm|GLI3_Hand2_second_motif.jpwm|FF|100	1	100	1.96	1.3701	0.510204	-0.700679	0.483503	1	GLI3_Hand2_third_motif	GLI3_Hand2_second_motif	FF	100	GLI3	GLI3	0
GLI3_Hand2_third_motif.jpwm|GLI3_Hand2_second_motif.jpwm|FF|55	5	100	1.84	1.38331	2.71739	2.28438	0.0223491	5	GLI3_Hand2_third_motif	GLI3_Hand2_second_motif	FF	55	GLI3	GLI3	0
GLI3_Hand2_third_motif.jpwm|GLI3_Hand2_second_motif.jpwm|FF|29	3	100	2.38	1.51611	1.2605	0.408942	0.682582	3	GLI3_Hand2_third_motif	GLI3_Hand2_second_motif	FF	29	GLI3	GLI3	0
GLI3_Hand2_third_motif.jpwm|GLI3_Hand2_second_motif.jpwm|FF|28	2	100	2.15	1.61041	0.930233	-0.0931437	0.925789	2	GLI3_Hand2_third_motif	GLI3_Hand2_second_motif	FF	28	GLI3	GLI3	0
GLI3_Hand2_third_motif.jpwm|GLI3_Hand2_second_motif.jpwm|FF|23	1	100	2.16	1.6436	0.462963	-0.705769	0.480332	1	GLI3_Hand2_third_motif	GLI3_Hand2_second_motif	FF	23	GLI3	GLI3	0
GLI3_Hand2_third_motif.jpwm|GLI3_Hand2_second_motif.jpwm|FF|22	1	100	2.33	1.7236	0.429185	-0.771639	0.440328	1	GLI3_Hand2_third_motif	GLI3_Hand2_second_motif	FF	22	GLI3	GLI3	0
GLI3_Hand2_third_motif.jpwm|GLI3_Hand2_second_motif.jpwm|FF|21	1	100	2.37	1.28437	0.421941	-1.06667	0.286119	1	GLI3_Hand2_third_motif	GLI3_Hand2_second_motif	FF	21	GLI3	GLI3	0
GLI3_Hand2_third_motif.jpwm|GLI3_Hand2_second_motif.jpwm|FF|20	3	100	2.15	1.48647	1.39535	0.571824	0.567441	3	GLI3_Hand2_third_motif	GLI3_Hand2_second_motif	FF	20	GLI3	GLI3	0
GLI3_Hand2_third_motif.jpwm|GLI3_Hand2_second_motif.jpwm|FF|27	4	100	2.16	1.46832	1.85185	1.25313	0.210157	4	GLI3_Hand2_third_motif	GLI3_Hand2_second_motif	FF	27	GLI3	GLI3	0
GLI3_Hand2_third_motif.jpwm|GLI3_Hand2_second_motif.jpwm|FF|25	3	100	2.35	1.77738	1.2766	0.365706	0.714584	3	GLI3_Hand2_third_motif	GLI3_Hand2_second_motif	FF	25	GLI3	GLI3	0
GLI3_Hand2_third_motif.jpwm|GLI3_Hand2_second_motif.jpwm|FF|24	2	100	2.22	1.40403	0.900901	-0.156691	0.875488	2	GLI3_Hand2_third_motif	GLI3_Hand2_second_motif	FF	24	GLI3	GLI3	0
GLI3_Hand2_third_motif.jpwm|GLI3_Hand2_second_motif.jpwm|FF|95	2	100	1.99	1.43192	1.00503	0.00698361	0.994428	2	GLI3_Hand2_third_motif	GLI3_Hand2_second_motif	FF	95	GLI3	GLI3	0
GLI3_Hand2_third_motif.jpwm|GLI3_Hand2_second_motif.jpwm|FF|9	2	100	2.19	1.55502	0.913242	-0.122185	0.902752	2	GLI3_Hand2_third_motif	GLI3_Hand2_second_motif	FF	9	GLI3	GLI3	0
GLI3_Hand2_third_motif.jpwm|GLI3_Hand2_second_motif.jpwm|FF|62	2	100	2.01	1.3295	0.995025	-0.00752161	0.993999	2	GLI3_Hand2_third_motif	GLI3_Hand2_second_motif	FF	62	GLI3	GLI3	0
GLI3_Hand2_third_motif.jpwm|GLI3_Hand2_second_motif.jpwm|FF|69	3	100	1.61	1.27045	1.86335	1.0941	0.27391	3	GLI3_Hand2_third_motif	GLI3_Hand2_second_motif	FF	69	GLI3	GLI3	0
GLI3_Hand2_third_motif.jpwm|GLI3_Hand2_second_motif.jpwm|FF|68	1	100	1.8	1.43548	0.555556	-0.557304	0.577319	1	GLI3_Hand2_third_motif	GLI3_Hand2_second_motif	FF	68	GLI3	GLI3	0
GLI3_Hand2_third_motif.jpwm|GLI3_Hand2_second_motif.jpwm|FF|99	4	100	1.65	1.22578	2.42424	1.91715	0.0552184	4	GLI3_Hand2_third_motif	GLI3_Hand2_second_motif	FF	99	GLI3	GLI3	0
GLI3_Hand2_third_motif.jpwm|GLI3_Hand2_second_motif.jpwm|FF|92	1	100	1.73	1.33979	0.578035	-0.544859	0.58585	1	GLI3_Hand2_third_motif	GLI3_Hand2_second_motif	FF	92	GLI3	GLI3	0
GLI3_Hand2_third_motif.jpwm|GLI3_Hand2_second_motif.jpwm|FF|93	1	100	1.8	1.28708	0.555556	-0.621564	0.534229	1	GLI3_Hand2_third_motif	GLI3_Hand2_second_motif	FF	93	GLI3	GLI3	0
GLI3_Hand2_third_motif.jpwm|GLI3_Hand2_second_motif.jpwm|FF|90	2	100	2.06	1.54279	0.970874	-0.0388906	0.968978	2	GLI3_Hand2_third_motif	GLI3_Hand2_second_motif	FF	90	GLI3	GLI3	0
GLI3_Hand2_third_motif.jpwm|GLI3_Hand2_second_motif.jpwm|FF|91	1	100	1.73	1.22972	0.578035	-0.593629	0.55276	1	GLI3_Hand2_third_motif	GLI3_Hand2_second_motif	FF	91	GLI3	GLI3	0
GLI3_Hand2_third_motif.jpwm|GLI3_Hand2_second_motif.jpwm|FF|96	3	100	1.68	1.25433	1.78571	1.05236	0.292635	3	GLI3_Hand2_third_motif	GLI3_Hand2_second_motif	FF	96	GLI3	GLI3	0
GLI3_Hand2_third_motif.jpwm|GLI3_Hand2_second_motif.jpwm|FF|97	1	100	1.83	1.44289	0.546448	-0.575236	0.565132	1	GLI3_Hand2_third_motif	GLI3_Hand2_second_motif	FF	97	GLI3	GLI3	0
GLI3_Hand2_third_motif.jpwm|GLI3_Hand2_second_motif.jpwm|FF|94	1	100	1.86	1.36345	0.537634	-0.630754	0.528201	1	GLI3_Hand2_third_motif	GLI3_Hand2_second_motif	FF	94	GLI3	GLI3	0
GLI3_Hand2_third_motif.jpwm|GLI3_Hand2_second_motif.jpwm|FF|44	5	100	1.9	1.41064	2.63158	2.19759	0.0279785	5	GLI3_Hand2_third_motif	GLI3_Hand2_second_motif	FF	44	GLI3	GLI3	0
GLI3_Hand2_third_motif.jpwm|GLI3_Hand2_second_motif.jpwm|FF|42	2	100	1.81	1.39765	1.10497	0.135942	0.891867	2	GLI3_Hand2_third_motif	GLI3_Hand2_second_motif	FF	42	GLI3	GLI3	0
GLI3_Hand2_third_motif.jpwm|GLI3_Hand2_second_motif.jpwm|FF|89	3	100	2.31	1.41203	1.2987	0.488657	0.625085	3	GLI3_Hand2_third_motif	GLI3_Hand2_second_motif	FF	89	GLI3	GLI3	0
GLI3_Hand2_third_motif.jpwm|GLI3_Hand2_second_motif.jpwm|FF|88	2	100	1.64	1.21871	1.21951	0.295394	0.767693	2	GLI3_Hand2_third_motif	GLI3_Hand2_second_motif	FF	88	GLI3	GLI3	0
GLI3_Hand2_third_motif.jpwm|GLI3_Hand2_second_motif.jpwm|FF|81	4	100	1.76	1.14698	2.27273	1.95296	0.0508243	4	GLI3_Hand2_third_motif	GLI3_Hand2_second_motif	FF	81	GLI3	GLI3	0
GLI3_Hand2_third_motif.jpwm|GLI3_Hand2_second_motif.jpwm|FF|80	2	100	1.67	1.31852	1.1976	0.250281	0.80237	2	GLI3_Hand2_third_motif	GLI3_Hand2_second_motif	FF	80	GLI3	GLI3	0
GLI3_Hand2_third_motif.jpwm|GLI3_Hand2_second_motif.jpwm|FF|83	2	100	1.8	1.42843	1.11111	0.140014	0.888649	2	GLI3_Hand2_third_motif	GLI3_Hand2_second_motif	FF	83	GLI3	GLI3	0
GLI3_Hand2_third_motif.jpwm|GLI3_Hand2_second_motif.jpwm|FF|85	5	100	1.83	1.49784	2.73224	2.11638	0.0343129	5	GLI3_Hand2_third_motif	GLI3_Hand2_second_motif	FF	85	GLI3	GLI3	0
GLI3_Hand2_third_motif.jpwm|GLI3_Hand2_second_motif.jpwm|FF|84	3	100	1.96	1.47655	1.53061	0.704344	0.481218	3	GLI3_Hand2_third_motif	GLI3_Hand2_second_motif	FF	84	GLI3	GLI3	0
GLI3_Hand2_third_motif.jpwm|GLI3_Hand2_second_motif.jpwm|FF|87	3	100	2	1.23091	1.5	0.812404	0.41656	3	GLI3_Hand2_third_motif	GLI3_Hand2_second_motif	FF	87	GLI3	GLI3	0
GLI3_Hand2_third_motif.jpwm|GLI3_Hand2_second_motif.jpwm|FF|86	6	100	1.8	1.43548	3.33333	2.92585	0.00343518	6	GLI3_Hand2_third_motif	GLI3_Hand2_second_motif	FF	86	GLI3	GLI3	0
GLI3_Hand2_third_motif.jpwm|GLI3_Hand2_second_motif.jpwm|FF|58	10	100	1.89	1.25445	5.29101	6.465	1.01297e-10	10	GLI3_Hand2_third_motif	GLI3_Hand2_second_motif	FF	58	GLI3	GLI3	0
GLI3_Hand2_third_motif.jpwm|GLI3_Hand2_second_motif.jpwm|FF|59	4	100	1.96	1.36271	2.04082	1.49702	0.134388	4	GLI3_Hand2_third_motif	GLI3_Hand2_second_motif	FF	59	GLI3	GLI3	0
GLI3_Hand2_third_motif.jpwm|GLI3_Hand2_second_motif.jpwm|FF|56	3	100	2.13	1.59959	1.40845	0.54389	0.586518	3	GLI3_Hand2_third_motif	GLI3_Hand2_second_motif	FF	56	GLI3	GLI3	0
GLI3_Hand2_third_motif.jpwm|GLI3_Hand2_second_motif.jpwm|FF|57	2	100	2	1.49071	1	0	1	2	GLI3_Hand2_third_motif	GLI3_Hand2_second_motif	FF	57	GLI3	GLI3	0
GLI3_Hand2_third_motif.jpwm|GLI3_Hand2_second_motif.jpwm|FF|54	5	100	2.02	1.40691	2.47525	2.11812	0.0341651	5	GLI3_Hand2_third_motif	GLI3_Hand2_second_motif	FF	54	GLI3	GLI3	0
GLI3_Hand2_third_motif.jpwm|GLI3_Hand2_second_motif.jpwm|FF|52	3	100	1.91	1.4291	1.57068	0.762718	0.445631	3	GLI3_Hand2_third_motif	GLI3_Hand2_second_motif	FF	52	GLI3	GLI3	0
GLI3_Hand2_third_motif.jpwm|GLI3_Hand2_second_motif.jpwm|FF|50	2	100	1.9	1.57313	1.05263	0.0635674	0.949315	2	GLI3_Hand2_third_motif	GLI3_Hand2_second_motif	FF	50	GLI3	GLI3	0
GLI3_Hand2_third_motif.jpwm|GLI3_Hand2_second_motif.jpwm|FF|51	1	100	1.77	1.29377	0.564972	-0.59516	0.551736	1	GLI3_Hand2_third_motif	GLI3_Hand2_second_motif	FF	51	GLI3	GLI3	0
GLI3_Hand2_third_motif.jpwm|GLI3_Hand2_second_motif.jpwm|FF|38	1	100	1.94	1.2935	0.515464	-0.726713	0.467402	1	GLI3_Hand2_third_motif	GLI3_Hand2_second_motif	FF	38	GLI3	GLI3	0
GLI3_Hand2_third_motif.jpwm|GLI3_Hand2_second_motif.jpwm|FF|0	1	100	2.17	1.44987	0.460829	-0.806969	0.419684	1	GLI3_Hand2_third_motif	GLI3_Hand2_second_motif	FF	0	GLI3	GLI3	0
GLI3_Hand2_third_motif.jpwm|GLI3_Hand2_second_motif.jpwm|FF|1	3	100	2.37	1.44708	1.26582	0.435359	0.663302	3	GLI3_Hand2_third_motif	GLI3_Hand2_second_motif	FF	1	GLI3	GLI3	0
GLI3_Hand2_third_motif.jpwm|GLI3_Hand2_second_motif.jpwm|FF|3	5	100	2.2	1.5042	2.27273	1.86145	0.0626805	5	GLI3_Hand2_third_motif	GLI3_Hand2_second_motif	FF	3	GLI3	GLI3	0
GLI3_Hand2_third_motif.jpwm|GLI3_Hand2_second_motif.jpwm|FF|5	1	100	2.07	1.58436	0.483092	-0.675351	0.499453	1	GLI3_Hand2_third_motif	GLI3_Hand2_second_motif	FF	5	GLI3	GLI3	0
GLI3_Hand2_third_motif.jpwm|GLI3_Hand2_second_motif.jpwm|FF|6	2	100	2.23	1.22972	0.896861	-0.187034	0.851634	2	GLI3_Hand2_third_motif	GLI3_Hand2_second_motif	FF	6	GLI3	GLI3	0
GLI3_Hand2_third_motif.jpwm|GLI3_Hand2_second_motif.jpwm|FF|7	4	100	2.49	1.50081	1.60643	1.00612	0.314356	4	GLI3_Hand2_third_motif	GLI3_Hand2_second_motif	FF	7	GLI3	GLI3	0
GLI3_Hand2_third_motif.jpwm|GLI3_Hand2_second_motif.jpwm|FF|49	8	100	1.87	1.30775	4.27807	4.68745	2.76629e-06	8	GLI3_Hand2_third_motif	GLI3_Hand2_second_motif	FF	49	GLI3	GLI3	0
GLI3_Hand2_third_motif.jpwm|GLI3_Hand2_second_motif.jpwm|FF|48	3	100	1.97	1.38866	1.52284	0.741721	0.458256	3	GLI3_Hand2_third_motif	GLI3_Hand2_second_motif	FF	48	GLI3	GLI3	0
GLI3_Hand2_third_motif.jpwm|GLI3_Hand2_second_motif.jpwm|FF|45	1	100	2.25	1.55943	0.444444	-0.801576	0.422799	1	GLI3_Hand2_third_motif	GLI3_Hand2_second_motif	FF	45	GLI3	GLI3	0
GLI3_Hand2_third_motif.jpwm|GLI3_Hand2_second_motif.jpwm|FF|47	3	100	1.8	1.34089	1.66667	0.89493	0.370825	3	GLI3_Hand2_third_motif	GLI3_Hand2_second_motif	FF	47	GLI3	GLI3	0
GLI3_Hand2_third_motif.jpwm|GLI3_Hand2_second_motif.jpwm|FF|46	4	100	2.19	1.67389	1.82648	1.08131	0.279559	4	GLI3_Hand2_third_motif	GLI3_Hand2_second_motif	FF	46	GLI3	GLI3	0
GLI3_Hand2_third_motif.jpwm|GLI3_Hand2_second_motif.jpwm|FF|41	2	100	1.77	1.45543	1.12994	0.158029	0.874434	2	GLI3_Hand2_third_motif	GLI3_Hand2_second_motif	FF	41	GLI3	GLI3	0
GLI3_Hand2_third_motif.jpwm|GLI3_Hand2_second_motif.jpwm|FF|40	3	100	1.88	1.32787	1.59574	0.843458	0.398973	3	GLI3_Hand2_third_motif	GLI3_Hand2_second_motif	FF	40	GLI3	GLI3	0
GLI3_Hand2_third_motif.jpwm|GLI3_Hand2_second_motif.jpwm|FF|43	2	100	2.04	1.29428	0.980392	-0.0309053	0.975345	2	GLI3_Hand2_third_motif	GLI3_Hand2_second_motif	FF	43	GLI3	GLI3	0
GLI3_only_first_motif.jpwm|GLI3_Hand2_second_motif.jpwm|FF|64	2	100	0.68	0.750488	2.94118	1.75886	0.0786021	2	GLI3_only_first_motif	GLI3_Hand2_second_motif	FF	64	GLI3	GLI3	0
GLI3_only_first_motif.jpwm|GLI3_Hand2_second_motif.jpwm|FF|65	1	100	0.76	0.88899	1.31579	0.269969	0.787184	1	GLI3_only_first_motif	GLI3_Hand2_second_motif	FF	65	GLI3	GLI3	0
GLI3_only_first_motif.jpwm|GLI3_Hand2_second_motif.jpwm|FF|66	2	100	0.66	0.654742	3.0303	2.04661	0.0406966	2	GLI3_only_first_motif	GLI3_Hand2_second_motif	FF	66	GLI3	GLI3	0
GLI3_only_first_motif.jpwm|GLI3_Hand2_second_motif.jpwm|FF|60	1	100	0.75	0.957427	1.33333	0.261116	0.794003	1	GLI3_only_first_motif	GLI3_Hand2_second_motif	FF	60	GLI3	GLI3	0
GLI3_only_first_motif.jpwm|GLI3_Hand2_second_motif.jpwm|FF|62	1	100	0.68	0.77694	1.47059	0.411872	0.680433	1	GLI3_only_first_motif	GLI3_Hand2_second_motif	FF	62	GLI3	GLI3	0
GLI3_only_first_motif.jpwm|GLI3_Hand2_second_motif.jpwm|FF|63	1	100	0.79	0.879566	1.26582	0.238754	0.811296	1	GLI3_only_first_motif	GLI3_Hand2_second_motif	FF	63	GLI3	GLI3	0
GLI3_only_first_motif.jpwm|GLI3_Hand2_second_motif.jpwm|FF|68	1	100	0.74	0.824131	1.35135	0.315484	0.752394	1	GLI3_only_first_motif	GLI3_Hand2_second_motif	FF	68	GLI3	GLI3	0
GLI3_only_first_motif.jpwm|GLI3_Hand2_second_motif.jpwm|FF|69	1	100	0.9	0.834847	1.11111	0.119782	0.904656	1	GLI3_only_first_motif	GLI3_Hand2_second_motif	FF	69	GLI3	GLI3	0
GLI3_only_first_motif.jpwm|GLI3_Hand2_second_motif.jpwm|FF|100	1	100	0.46	0.642281	2.17391	0.840753	0.400486	1	GLI3_only_first_motif	GLI3_Hand2_second_motif	FF	100	GLI3	GLI3	0
GLI3_only_first_motif.jpwm|GLI3_Hand2_second_motif.jpwm|FF|97	1	100	0.64	0.703814	1.5625	0.511499	0.609002	1	GLI3_only_first_motif	GLI3_Hand2_second_motif	FF	97	GLI3	GLI3	0
GLI3_only_first_motif.jpwm|GLI3_Hand2_second_motif.jpwm|FF|11	5	100	0.83	0.865209	6.0241	4.81965	1.43812e-06	5	GLI3_only_first_motif	GLI3_Hand2_second_motif	FF	11	GLI3	GLI3	0
GLI3_only_first_motif.jpwm|GLI3_Hand2_second_motif.jpwm|FF|10	3	100	0.95	1.08595	3.15789	1.88774	0.0590604	3	GLI3_only_first_motif	GLI3_Hand2_second_motif	FF	10	GLI3	GLI3	0
GLI3_only_first_motif.jpwm|GLI3_Hand2_second_motif.jpwm|FF|13	3	100	0.83	0.888251	3.61446	2.443	0.0145656	3	GLI3_only_first_motif	GLI3_Hand2_second_motif	FF	13	GLI3	GLI3	0
GLI3_only_first_motif.jpwm|GLI3_Hand2_second_motif.jpwm|FF|12	3	100	0.88	0.890806	3.40909	2.37987	0.0173189	3	GLI3_only_first_motif	GLI3_Hand2_second_motif	FF	12	GLI3	GLI3	0
GLI3_only_first_motif.jpwm|GLI3_Hand2_second_motif.jpwm|FF|15	1	100	0.8	0.942809	1.25	0.212132	0.832004	1	GLI3_only_first_motif	GLI3_Hand2_second_motif	FF	15	GLI3	GLI3	0
GLI3_only_first_motif.jpwm|GLI3_Hand2_second_motif.jpwm|FF|39	1	100	0.7	0.822659	1.42857	0.364671	0.715357	1	GLI3_only_first_motif	GLI3_Hand2_second_motif	FF	39	GLI3	GLI3	0
GLI3_only_first_motif.jpwm|GLI3_Hand2_second_motif.jpwm|FF|38	3	100	0.8	0.942809	3.75	2.33345	0.0196244	3	GLI3_only_first_motif	GLI3_Hand2_second_motif	FF	38	GLI3	GLI3	0
GLI3_only_first_motif.jpwm|GLI3_Hand2_second_motif.jpwm|FF|37	1	100	0.82	0.95748	1.21951	0.187994	0.850882	1	GLI3_only_first_motif	GLI3_Hand2_second_motif	FF	37	GLI3	GLI3	0
GLI3_only_first_motif.jpwm|GLI3_Hand2_second_motif.jpwm|FF|36	1	100	0.81	0.939536	1.23457	0.202228	0.839739	1	GLI3_only_first_motif	GLI3_Hand2_second_motif	FF	36	GLI3	GLI3	0
GLI3_only_first_motif.jpwm|GLI3_Hand2_second_motif.jpwm|FF|35	1	100	0.84	0.950492	1.19048	0.168334	0.866321	1	GLI3_only_first_motif	GLI3_Hand2_second_motif	FF	35	GLI3	GLI3	0
GLI3_only_first_motif.jpwm|GLI3_Hand2_second_motif.jpwm|FF|33	1	100	0.87	0.895048	1.14943	0.145244	0.884519	1	GLI3_only_first_motif	GLI3_Hand2_second_motif	FF	33	GLI3	GLI3	0
GLI3_only_first_motif.jpwm|GLI3_Hand2_second_motif.jpwm|FF|31	5	100	0.83	0.817177	6.0241	5.10294	3.34425e-07	5	GLI3_only_first_motif	GLI3_Hand2_second_motif	FF	31	GLI3	GLI3	0
GLI3_only_first_motif.jpwm|GLI3_Hand2_second_motif.jpwm|FF|30	3	100	0.83	0.910711	3.61446	2.38275	0.0171836	3	GLI3_only_first_motif	GLI3_Hand2_second_motif	FF	30	GLI3	GLI3	0
GLI3_only_first_motif.jpwm|GLI3_Hand2_second_motif.jpwm|FF|28	2	100	0.75	0.903137	2.66667	1.38406	0.166339	2	GLI3_only_first_motif	GLI3_Hand2_second_motif	FF	28	GLI3	GLI3	0
GLI3_only_first_motif.jpwm|GLI3_Hand2_second_motif.jpwm|FF|29	1	100	0.79	0.742573	1.26582	0.282801	0.77733	1	GLI3_only_first_motif	GLI3_Hand2_second_motif	FF	29	GLI3	GLI3	0
GLI3_only_first_motif.jpwm|GLI3_Hand2_second_motif.jpwm|FF|21	1	100	0.73	0.86287	1.36986	0.312909	0.75435	1	GLI3_only_first_motif	GLI3_Hand2_second_motif	FF	21	GLI3	GLI3	0
GLI3_only_first_motif.jpwm|GLI3_Hand2_second_motif.jpwm|FF|22	1	100	0.8	0.864566	1.25	0.23133	0.817059	1	GLI3_only_first_motif	GLI3_Hand2_second_motif	FF	22	GLI3	GLI3	0
GLI3_only_first_motif.jpwm|GLI3_Hand2_second_motif.jpwm|FF|23	2	100	0.88	0.966928	2.27273	1.15831	0.246738	2	GLI3_only_first_motif	GLI3_Hand2_second_motif	FF	23	GLI3	GLI3	0
GLI3_only_first_motif.jpwm|GLI3_Hand2_second_motif.jpwm|FF|24	3	100	0.88	1.10353	3.40909	1.92111	0.0547181	3	GLI3_only_first_motif	GLI3_Hand2_second_motif	FF	24	GLI3	GLI3	0
GLI3_only_first_motif.jpwm|GLI3_Hand2_second_motif.jpwm|FF|26	2	100	0.76	0.922447	2.63158	1.34425	0.178867	2	GLI3_only_first_motif	GLI3_Hand2_second_motif	FF	26	GLI3	GLI3	0
GLI3_only_first_motif.jpwm|GLI3_Hand2_second_motif.jpwm|FF|27	1	100	0.84	0.918057	1.19048	0.174281	0.861645	1	GLI3_only_first_motif	GLI3_Hand2_second_motif	FF	27	GLI3	GLI3	0
GLI3_only_first_motif.jpwm|GLI3_Hand2_second_motif.jpwm|FF|9	1	100	0.91	0.911154	1.0989	0.0987758	0.921316	1	GLI3_only_first_motif	GLI3_Hand2_second_motif	FF	9	GLI3	GLI3	0
GLI3_only_first_motif.jpwm|GLI3_Hand2_second_motif.jpwm|FF|8	3	100	0.8	0.887625	3.75	2.47852	0.0131928	3	GLI3_only_first_motif	GLI3_Hand2_second_motif	FF	8	GLI3	GLI3	0
GLI3_only_first_motif.jpwm|GLI3_Hand2_second_motif.jpwm|FF|3	2	100	0.86	0.921352	2.32558	1.23731	0.215971	2	GLI3_only_first_motif	GLI3_Hand2_second_motif	FF	3	GLI3	GLI3	0
GLI3_only_first_motif.jpwm|GLI3_Hand2_second_motif.jpwm|FF|2	1	100	0.81	0.960797	1.23457	0.197752	0.843239	1	GLI3_only_first_motif	GLI3_Hand2_second_motif	FF	2	GLI3	GLI3	0
GLI3_only_first_motif.jpwm|GLI3_Hand2_second_motif.jpwm|FF|4	30	100	0.89	0.99387	33.7079	29.2895	1.40942e-188	30	GLI3_only_first_motif	GLI3_Hand2_second_motif	FF	4	GLI3	GLI3	0
GLI3_only_first_motif.jpwm|GLI3_Hand2_second_motif.jpwm|FF|7	4	100	0.84	0.825356	4.7619	3.82865	0.000128847	4	GLI3_only_first_motif	GLI3_Hand2_second_motif	FF	7	GLI3	GLI3	0
GLI3_only_first_motif.jpwm|GLI3_Hand2_second_motif.jpwm|FF|6	4	100	0.76	0.877554	5.26316	3.69208	0.000222427	4	GLI3_only_first_motif	GLI3_Hand2_second_motif	FF	6	GLI3	GLI3	0
GLI3_only_first_motif.jpwm|GLI3_Hand2_second_motif.jpwm|FF|-1	2	100	0.33	0.603943	6.06061	2.76516	0.00568948	2	GLI3_only_first_motif	GLI3_Hand2_second_motif	FF	-1	GLI3	GLI3	0
GLI3_only_first_motif.jpwm|GLI3_Hand2_second_motif.jpwm|FF|86	3	100	0.66	0.819214	4.54545	2.8564	0.00428478	3	GLI3_only_first_motif	GLI3_Hand2_second_motif	FF	86	GLI3	GLI3	0
GLI3_only_first_motif.jpwm|GLI3_Hand2_second_motif.jpwm|FF|84	3	100	0.77	0.851084	3.8961	2.62019	0.00878811	3	GLI3_only_first_motif	GLI3_Hand2_second_motif	FF	84	GLI3	GLI3	0
GLI3_only_first_motif.jpwm|GLI3_Hand2_second_motif.jpwm|FF|91	1	100	0.98	1.0539	1.02041	0.0189771	0.984859	1	GLI3_only_first_motif	GLI3_Hand2_second_motif	FF	91	GLI3	GLI3	0
GLI3_only_first_motif.jpwm|GLI3_Hand2_second_motif.jpwm|FF|99	1	100	0.69	0.787465	1.44928	0.393668	0.693826	1	GLI3_only_first_motif	GLI3_Hand2_second_motif	FF	99	GLI3	GLI3	0
GLI3_only_first_motif.jpwm|GLI3_Hand2_second_motif.jpwm|FF|90	1	100	0.9	1.03962	1.11111	0.0961891	0.92337	1	GLI3_only_first_motif	GLI3_Hand2_second_motif	FF	90	GLI3	GLI3	0
GLI3_only_first_motif.jpwm|GLI3_Hand2_second_motif.jpwm|FF|93	1	100	0.85	1.02863	1.17647	0.145825	0.88406	1	GLI3_only_first_motif	GLI3_Hand2_second_motif	FF	93	GLI3	GLI3	0
GLI3_only_first_motif.jpwm|GLI3_Hand2_second_motif.jpwm|FF|95	1	100	0.73	0.839131	1.36986	0.321761	0.747634	1	GLI3_only_first_motif	GLI3_Hand2_second_motif	FF	95	GLI3	GLI3	0
GLI3_only_first_motif.jpwm|GLI3_Hand2_second_motif.jpwm|FF|94	1	100	0.56	0.729189	1.78571	0.60341	0.546236	1	GLI3_only_first_motif	GLI3_Hand2_second_motif	FF	94	GLI3	GLI3	0
GLI3_only_first_motif.jpwm|GLI3_Hand2_second_motif.jpwm|FF|96	1	100	0.77	0.86287	1.2987	0.266552	0.789814	1	GLI3_only_first_motif	GLI3_Hand2_second_motif	FF	96	GLI3	GLI3	0
GLI3_only_first_motif.jpwm|GLI3_Hand2_second_motif.jpwm|FF|17	2	100	0.68	0.839432	2.94118	1.57249	0.115837	2	GLI3_only_first_motif	GLI3_Hand2_second_motif	FF	17	GLI3	GLI3	0
GLI3_only_first_motif.jpwm|GLI3_Hand2_second_motif.jpwm|FF|18	1	100	0.78	0.847814	1.28205	0.259491	0.795256	1	GLI3_only_first_motif	GLI3_Hand2_second_motif	FF	18	GLI3	GLI3	0
GLI3_only_first_motif.jpwm|GLI3_Hand2_second_motif.jpwm|FF|16	1	100	0.88	0.856113	1.13636	0.140168	0.888527	1	GLI3_only_first_motif	GLI3_Hand2_second_motif	FF	16	GLI3	GLI3	0
GLI3_only_first_motif.jpwm|GLI3_Hand2_second_motif.jpwm|FF|82	2	100	0.71	0.890976	2.8169	1.44785	0.147659	2	GLI3_only_first_motif	GLI3_Hand2_second_motif	FF	82	GLI3	GLI3	0
GLI3_only_first_motif.jpwm|GLI3_Hand2_second_motif.jpwm|FF|83	1	100	0.59	0.779731	1.69492	0.525823	0.599011	1	GLI3_only_first_motif	GLI3_Hand2_second_motif	FF	83	GLI3	GLI3	0
GLI3_only_first_motif.jpwm|GLI3_Hand2_second_motif.jpwm|FF|80	5	100	0.72	0.792388	6.94444	5.40139	6.6125e-08	5	GLI3_only_first_motif	GLI3_Hand2_second_motif	FF	80	GLI3	GLI3	0
GLI3_only_first_motif.jpwm|GLI3_Hand2_second_motif.jpwm|FF|85	3	100	0.79	0.879566	3.79747	2.5126	0.0119844	3	GLI3_only_first_motif	GLI3_Hand2_second_motif	FF	85	GLI3	GLI3	0
GLI3_only_first_motif.jpwm|GLI3_Hand2_second_motif.jpwm|FF|55	2	100	0.71	0.924362	2.8169	1.39556	0.162848	2	GLI3_only_first_motif	GLI3_Hand2_second_motif	FF	55	GLI3	GLI3	0
GLI3_only_first_motif.jpwm|GLI3_Hand2_second_motif.jpwm|FF|57	1	100	0.8	0.953463	1.25	0.209762	0.833854	1	GLI3_only_first_motif	GLI3_Hand2_second_motif	FF	57	GLI3	GLI3	0
GLI3_only_first_motif.jpwm|GLI3_Hand2_second_motif.jpwm|FF|56	2	100	0.58	0.727247	3.44828	1.95257	0.0508708	2	GLI3_only_first_motif	GLI3_Hand2_second_motif	FF	56	GLI3	GLI3	0
GLI3_only_first_motif.jpwm|GLI3_Hand2_second_motif.jpwm|FF|51	2	100	0.68	0.750488	2.94118	1.75886	0.0786021	2	GLI3_only_first_motif	GLI3_Hand2_second_motif	FF	51	GLI3	GLI3	0
GLI3_only_first_motif.jpwm|GLI3_Hand2_second_motif.jpwm|FF|53	4	100	0.64	0.810537	6.25	4.1454	3.39219e-05	4	GLI3_only_first_motif	GLI3_Hand2_second_motif	FF	53	GLI3	GLI3	0
GLI3_only_first_motif.jpwm|GLI3_Hand2_second_motif.jpwm|FF|52	1	100	0.68	0.77694	1.47059	0.411872	0.680433	1	GLI3_only_first_motif	GLI3_Hand2_second_motif	FF	52	GLI3	GLI3	0
GLI3_only_first_motif.jpwm|GLI3_Hand2_second_motif.jpwm|FF|48	2	100	0.82	0.92529	2.43902	1.27528	0.202212	2	GLI3_only_first_motif	GLI3_Hand2_second_motif	FF	48	GLI3	GLI3	0
GLI3_only_first_motif.jpwm|GLI3_Hand2_second_motif.jpwm|FF|49	1	100	0.74	0.927906	1.35135	0.280201	0.779324	1	GLI3_only_first_motif	GLI3_Hand2_second_motif	FF	49	GLI3	GLI3	0
GLI3_only_first_motif.jpwm|GLI3_Hand2_second_motif.jpwm|FF|46	1	100	0.79	0.945964	1.26582	0.221996	0.824317	1	GLI3_only_first_motif	GLI3_Hand2_second_motif	FF	46	GLI3	GLI3	0
GLI3_only_first_motif.jpwm|GLI3_Hand2_second_motif.jpwm|FF|44	2	100	0.76	0.911431	2.63158	1.3605	0.173673	2	GLI3_only_first_motif	GLI3_Hand2_second_motif	FF	44	GLI3	GLI3	0
GLI3_only_first_motif.jpwm|GLI3_Hand2_second_motif.jpwm|FF|42	2	100	0.73	0.814701	2.73973	1.55885	0.119031	2	GLI3_only_first_motif	GLI3_Hand2_second_motif	FF	42	GLI3	GLI3	0
GLI3_only_first_motif.jpwm|GLI3_Hand2_second_motif.jpwm|FF|43	2	100	0.78	0.970057	2.5641	1.25766	0.208515	2	GLI3_only_first_motif	GLI3_Hand2_second_motif	FF	43	GLI3	GLI3	0
GLI3_only_first_motif.jpwm|GLI3_Hand2_second_motif.jpwm|FF|40	1	100	0.81	0.895499	1.23457	0.212172	0.831973	1	GLI3_only_first_motif	GLI3_Hand2_second_motif	FF	40	GLI3	GLI3	0
GLI3_only_first_motif.jpwm|GLI3_Hand2_second_motif.jpwm|FF|79	4	100	0.76	0.965255	5.26316	3.35663	0.000788997	4	GLI3_only_first_motif	GLI3_Hand2_second_motif	FF	79	GLI3	GLI3	0
GLI3_only_first_motif.jpwm|GLI3_Hand2_second_motif.jpwm|FF|78	1	100	0.8	0.864566	1.25	0.23133	0.817059	1	GLI3_only_first_motif	GLI3_Hand2_second_motif	FF	78	GLI3	GLI3	0
GLI3_only_first_motif.jpwm|GLI3_Hand2_second_motif.jpwm|FF|71	2	100	0.73	0.814701	2.73973	1.55885	0.119031	2	GLI3_only_first_motif	GLI3_Hand2_second_motif	FF	71	GLI3	GLI3	0
GLI3_only_first_motif.jpwm|GLI3_Hand2_second_motif.jpwm|FF|77	1	100	0.75	0.808728	1.33333	0.309128	0.757224	1	GLI3_only_first_motif	GLI3_Hand2_second_motif	FF	77	GLI3	GLI3	0
GLI3_only_first_motif.jpwm|GLI3_Hand2_second_motif.jpwm|FF|76	1	100	0.78	0.785988	1.28205	0.279902	0.779552	1	GLI3_only_first_motif	GLI3_Hand2_second_motif	FF	76	GLI3	GLI3	0
GLI3_only_first_motif.jpwm|GLI3_Hand2_second_motif.jpwm|FF|74	1	100	0.58	0.727247	1.72414	0.57752	0.563588	1	GLI3_only_first_motif	GLI3_Hand2_second_motif	FF	74	GLI3	GLI3	0
M04150_2.00.jpwm|GLI3_Hand2_second_motif.jpwm|FF|100	1	100	0.73	0.750151	1.36986	0.359927	0.718902	1	Hand2	GLI3_Hand2_second_motif	FF	100	Hand2	GLI3	1
M04150_2.00.jpwm|GLI3_Hand2_second_motif.jpwm|FF|-3	5	100	3.24	1.73566	1.54321	1.01402	0.310572	5	Hand2	GLI3_Hand2_second_motif	FF	-3	Hand2	GLI3	1
M04150_2.00.jpwm|GLI3_Hand2_second_motif.jpwm|FF|-1	1	100	0.77	0.827006	1.2987	0.278112	0.780927	1	Hand2	GLI3_Hand2_second_motif	FF	-1	Hand2	GLI3	1
M04150_2.00.jpwm|GLI3_Hand2_second_motif.jpwm|FF|-4	1	100	0.68	0.839432	1.47059	0.38121	0.703047	1	Hand2	GLI3_Hand2_second_motif	FF	-4	Hand2	GLI3	1
M04150_2.00.jpwm|GLI3_Hand2_second_motif.jpwm|FF|80	1	100	0.71	0.924362	1.40845	0.31373	0.753726	1	Hand2	GLI3_Hand2_second_motif	FF	80	Hand2	GLI3	1
M04150_2.00.jpwm|GLI3_Hand2_second_motif.jpwm|FF|83	1	100	0.66	0.75505	1.51515	0.450301	0.652493	1	Hand2	GLI3_Hand2_second_motif	FF	83	Hand2	GLI3	1
M04150_2.00.jpwm|GLI3_Hand2_second_motif.jpwm|FF|84	1	100	0.56	0.795442	1.78571	0.553152	0.580159	1	Hand2	GLI3_Hand2_second_motif	FF	84	Hand2	GLI3	1
M04150_2.00.jpwm|GLI3_Hand2_second_motif.jpwm|FF|86	1	100	0.56	0.80804	1.78571	0.544527	0.586079	1	Hand2	GLI3_Hand2_second_motif	FF	86	Hand2	GLI3	1
M04150_2.00.jpwm|GLI3_Hand2_second_motif.jpwm|FF|89	1	100	0.72	0.779536	1.38889	0.359188	0.719455	1	Hand2	GLI3_Hand2_second_motif	FF	89	Hand2	GLI3	1
M04150_2.00.jpwm|GLI3_Hand2_second_motif.jpwm|FF|88	1	100	0.73	0.90849	1.36986	0.297197	0.766316	1	Hand2	GLI3_Hand2_second_motif	FF	88	Hand2	GLI3	1
M04150_2.00.jpwm|GLI3_Hand2_second_motif.jpwm|FF|96	3	100	0.67	0.71145	4.47761	3.275	0.00105662	3	Hand2	GLI3_Hand2_second_motif	FF	96	Hand2	GLI3	1
M04150_2.00.jpwm|GLI3_Hand2_second_motif.jpwm|FF|97	1	100	0.75	0.880484	1.33333	0.283935	0.77646	1	Hand2	GLI3_Hand2_second_motif	FF	97	Hand2	GLI3	1
M04150_2.00.jpwm|GLI3_Hand2_second_motif.jpwm|FF|94	2	100	0.68	0.827312	2.94118	1.59553	0.110594	2	Hand2	GLI3_Hand2_second_motif	FF	94	Hand2	GLI3	1
M04150_2.00.jpwm|GLI3_Hand2_second_motif.jpwm|FF|95	1	100	0.61	0.764027	1.63934	0.510453	0.609734	1	Hand2	GLI3_Hand2_second_motif	FF	95	Hand2	GLI3	1
M04150_2.00.jpwm|GLI3_Hand2_second_motif.jpwm|FF|90	1	100	0.68	0.736906	1.47059	0.434248	0.664108	1	Hand2	GLI3_Hand2_second_motif	FF	90	Hand2	GLI3	1
M04150_2.00.jpwm|GLI3_Hand2_second_motif.jpwm|FF|69	3	100	0.62	0.838228	4.83871	2.83932	0.00452094	3	Hand2	GLI3_Hand2_second_motif	FF	69	Hand2	GLI3	1
M04150_2.00.jpwm|GLI3_Hand2_second_motif.jpwm|FF|68	1	100	0.82	0.978352	1.21951	0.183983	0.854027	1	Hand2	GLI3_Hand2_second_motif	FF	68	Hand2	GLI3	1
M04150_2.00.jpwm|GLI3_Hand2_second_motif.jpwm|FF|61	1	100	0.68	0.96274	1.47059	0.332385	0.739599	1	Hand2	GLI3_Hand2_second_motif	FF	61	Hand2	GLI3	1
M04150_2.00.jpwm|GLI3_Hand2_second_motif.jpwm|FF|67	1	100	0.74	0.836298	1.35135	0.310894	0.755881	1	Hand2	GLI3_Hand2_second_motif	FF	67	Hand2	GLI3	1
M04150_2.00.jpwm|GLI3_Hand2_second_motif.jpwm|FF|79	1	100	0.7	0.810287	1.42857	0.370239	0.711204	1	Hand2	GLI3_Hand2_second_motif	FF	79	Hand2	GLI3	1
M04150_2.00.jpwm|GLI3_Hand2_second_motif.jpwm|FF|74	2	100	0.76	0.996154	2.63158	1.24479	0.21321	2	Hand2	GLI3_Hand2_second_motif	FF	74	Hand2	GLI3	1
M04150_2.00.jpwm|GLI3_Hand2_second_motif.jpwm|FF|76	1	100	0.63	0.860526	1.5873	0.42997	0.667218	1	Hand2	GLI3_Hand2_second_motif	FF	76	Hand2	GLI3	1
M04150_2.00.jpwm|GLI3_Hand2_second_motif.jpwm|FF|77	1	100	0.61	0.863339	1.63934	0.451735	0.65146	1	Hand2	GLI3_Hand2_second_motif	FF	77	Hand2	GLI3	1
M04150_2.00.jpwm|GLI3_Hand2_second_motif.jpwm|FF|49	1	100	0.67	0.804721	1.49254	0.41008	0.681747	1	Hand2	GLI3_Hand2_second_motif	FF	49	Hand2	GLI3	1
M04150_2.00.jpwm|GLI3_Hand2_second_motif.jpwm|FF|48	1	100	0.63	0.719919	1.5873	0.513947	0.607289	1	Hand2	GLI3_Hand2_second_motif	FF	48	Hand2	GLI3	1
M04150_2.00.jpwm|GLI3_Hand2_second_motif.jpwm|FF|44	1	100	0.64	0.797977	1.5625	0.451141	0.651888	1	Hand2	GLI3_Hand2_second_motif	FF	44	Hand2	GLI3	1
M04150_2.00.jpwm|GLI3_Hand2_second_motif.jpwm|FF|47	1	100	0.77	0.814701	1.2987	0.282312	0.777704	1	Hand2	GLI3_Hand2_second_motif	FF	47	Hand2	GLI3	1
M04150_2.00.jpwm|GLI3_Hand2_second_motif.jpwm|FF|41	1	100	0.79	0.879566	1.26582	0.238754	0.811296	1	Hand2	GLI3_Hand2_second_motif	FF	41	Hand2	GLI3	1
M04150_2.00.jpwm|GLI3_Hand2_second_motif.jpwm|FF|40	1	100	0.7	0.84686	1.42857	0.35425	0.723152	1	Hand2	GLI3_Hand2_second_motif	FF	40	Hand2	GLI3	1
M04150_2.00.jpwm|GLI3_Hand2_second_motif.jpwm|FF|42	1	100	0.81	0.895499	1.23457	0.212172	0.831973	1	Hand2	GLI3_Hand2_second_motif	FF	42	Hand2	GLI3	1
M04150_2.00.jpwm|GLI3_Hand2_second_motif.jpwm|FF|53	4	100	0.82	0.880542	4.87805	3.61141	0.000304532	4	Hand2	GLI3_Hand2_second_motif	FF	53	Hand2	GLI3	1
M04150_2.00.jpwm|GLI3_Hand2_second_motif.jpwm|FF|50	1	100	0.76	0.88899	1.31579	0.269969	0.787184	1	Hand2	GLI3_Hand2_second_motif	FF	50	Hand2	GLI3	1
M04150_2.00.jpwm|GLI3_Hand2_second_motif.jpwm|FF|51	2	100	0.88	1.00785	2.27273	1.11128	0.266448	2	Hand2	GLI3_Hand2_second_motif	FF	51	Hand2	GLI3	1
M04150_2.00.jpwm|GLI3_Hand2_second_motif.jpwm|FF|57	1	100	1	1.02494	1	0	1	1	Hand2	GLI3_Hand2_second_motif	FF	57	Hand2	GLI3	1
M04150_2.00.jpwm|GLI3_Hand2_second_motif.jpwm|FF|54	2	100	0.68	0.802521	2.94118	1.64482	0.100008	2	Hand2	GLI3_Hand2_second_motif	FF	54	Hand2	GLI3	1
M04150_2.00.jpwm|GLI3_Hand2_second_motif.jpwm|FF|55	1	100	0.78	0.882833	1.28205	0.249198	0.803208	1	Hand2	GLI3_Hand2_second_motif	FF	55	Hand2	GLI3	1
M04150_2.00.jpwm|GLI3_Hand2_second_motif.jpwm|FF|59	2	100	0.83	0.943398	2.40964	1.2402	0.214902	2	Hand2	GLI3_Hand2_second_motif	FF	59	Hand2	GLI3	1
M04150_2.00.jpwm|GLI3_Hand2_second_motif.jpwm|FF|9	1	100	0.69	0.860995	1.44928	0.360048	0.718811	1	Hand2	GLI3_Hand2_second_motif	FF	9	Hand2	GLI3	1
M04150_2.00.jpwm|GLI3_Hand2_second_motif.jpwm|FF|4	1	100	0.69	0.82505	1.44928	0.375735	0.707114	1	Hand2	GLI3_Hand2_second_motif	FF	4	Hand2	GLI3	1
M04150_2.00.jpwm|GLI3_Hand2_second_motif.jpwm|FF|5	2	100	0.87	0.917341	2.29885	1.23182	0.218016	2	Hand2	GLI3_Hand2_second_motif	FF	5	Hand2	GLI3	1
M04150_2.00.jpwm|GLI3_Hand2_second_motif.jpwm|FF|7	2	100	0.89	0.851558	2.24719	1.30349	0.192407	2	Hand2	GLI3_Hand2_second_motif	FF	7	Hand2	GLI3	1
M04150_2.00.jpwm|GLI3_Hand2_second_motif.jpwm|FF|3	4	100	0.84	0.950492	4.7619	3.3246	0.00088547	4	Hand2	GLI3_Hand2_second_motif	FF	3	Hand2	GLI3	1
M04150_2.00.jpwm|GLI3_Hand2_second_motif.jpwm|FF|25	1	100	0.86	0.8648	1.16279	0.161887	0.871395	1	Hand2	GLI3_Hand2_second_motif	FF	25	Hand2	GLI3	1
M04150_2.00.jpwm|GLI3_Hand2_second_motif.jpwm|FF|24	1	100	0.84	0.825356	1.19048	0.193856	0.846289	1	Hand2	GLI3_Hand2_second_motif	FF	24	Hand2	GLI3	1
M04150_2.00.jpwm|GLI3_Hand2_second_motif.jpwm|FF|29	2	100	0.97	1.01956	2.06186	1.01024	0.312379	2	Hand2	GLI3_Hand2_second_motif	FF	29	Hand2	GLI3	1
M04150_2.00.jpwm|GLI3_Hand2_second_motif.jpwm|FF|34	1	100	0.69	0.812715	1.44928	0.381438	0.702878	1	Hand2	GLI3_Hand2_second_motif	FF	34	Hand2	GLI3	1
M04150_2.00.jpwm|GLI3_Hand2_second_motif.jpwm|FF|36	1	100	0.9	0.989847	1.11111	0.101026	0.91953	1	Hand2	GLI3_Hand2_second_motif	FF	36	Hand2	GLI3	1
M04150_2.00.jpwm|GLI3_Hand2_second_motif.jpwm|FF|30	1	100	0.67	0.792069	1.49254	0.41663	0.676949	1	Hand2	GLI3_Hand2_second_motif	FF	30	Hand2	GLI3	1
M04150_2.00.jpwm|GLI3_Hand2_second_motif.jpwm|FF|31	1	100	0.76	0.985962	1.31579	0.243417	0.807682	1	Hand2	GLI3_Hand2_second_motif	FF	31	Hand2	GLI3	1
M04150_2.00.jpwm|GLI3_Hand2_second_motif.jpwm|FF|38	1	100	0.71	0.844411	1.40845	0.343435	0.731272	1	Hand2	GLI3_Hand2_second_motif	FF	38	Hand2	GLI3	1
M04150_2.00.jpwm|GLI3_Hand2_second_motif.jpwm|FF|73	1	100	0.59	0.739847	1.69492	0.554169	0.579463	1	Hand2	GLI3_Hand2_second_motif	FF	73	Hand2	GLI3	1
M04150_2.00.jpwm|GLI3_Hand2_second_motif.jpwm|FF|18	1	100	0.81	0.872648	1.23457	0.217728	0.827641	1	Hand2	GLI3_Hand2_second_motif	FF	18	Hand2	GLI3	1
M04150_2.00.jpwm|GLI3_Hand2_second_motif.jpwm|FF|19	1	100	0.76	0.865967	1.31579	0.277147	0.781667	1	Hand2	GLI3_Hand2_second_motif	FF	19	Hand2	GLI3	1
M04150_2.00.jpwm|GLI3_Hand2_second_motif.jpwm|FF|14	2	100	0.8	0.984732	2.5	1.21861	0.222994	2	Hand2	GLI3_Hand2_second_motif	FF	14	Hand2	GLI3	1
M04150_2.00.jpwm|GLI3_Hand2_second_motif.jpwm|FF|15	2	100	0.86	0.974628	2.32558	1.16968	0.242131	2	Hand2	GLI3_Hand2_second_motif	FF	15	Hand2	GLI3	1
M04150_2.00.jpwm|GLI3_Hand2_second_motif.jpwm|FF|13	1	100	1.01	1.15027	0.990099	-0.00869358	0.993064	1	Hand2	GLI3_Hand2_second_motif	FF	13	Hand2	GLI3	1
GLI3_Hand2_second_motif.jpwm|GLI3_Hand2_third_motif.jpwm|RF|87	1	100	2.41	1.46401	0.414938	-0.963106	0.335494	1	GLI3_Hand2_second_motif	GLI3_Hand2_third_motif	RF	87	GLI3	GLI3	0
GLI3_Hand2_second_motif.jpwm|GLI3_Hand2_third_motif.jpwm|RF|85	1	100	2.15	1.43812	0.465116	-0.799657	0.42391	1	GLI3_Hand2_second_motif	GLI3_Hand2_third_motif	RF	85	GLI3	GLI3	0
GLI3_Hand2_second_motif.jpwm|GLI3_Hand2_third_motif.jpwm|RF|84	3	100	2.49	1.66664	1.20482	0.306006	0.7596	3	GLI3_Hand2_second_motif	GLI3_Hand2_third_motif	RF	84	GLI3	GLI3	0
GLI3_Hand2_second_motif.jpwm|GLI3_Hand2_third_motif.jpwm|RF|83	1	100	2.24	1.5382	0.446429	-0.806137	0.420164	1	GLI3_Hand2_second_motif	GLI3_Hand2_third_motif	RF	83	GLI3	GLI3	0
GLI3_Hand2_second_motif.jpwm|GLI3_Hand2_third_motif.jpwm|RF|82	5	100	2.32	1.47628	2.15517	1.81538	0.0694659	5	GLI3_Hand2_second_motif	GLI3_Hand2_third_motif	RF	82	GLI3	GLI3	0
GLI3_Hand2_second_motif.jpwm|GLI3_Hand2_third_motif.jpwm|RF|81	7	100	2.35	1.63531	2.97872	2.8435	0.00446216	7	GLI3_Hand2_second_motif	GLI3_Hand2_third_motif	RF	81	GLI3	GLI3	0
GLI3_Hand2_second_motif.jpwm|GLI3_Hand2_third_motif.jpwm|RF|80	2	100	2.1	1.5209	0.952381	-0.0657506	0.947576	2	GLI3_Hand2_second_motif	GLI3_Hand2_third_motif	RF	80	GLI3	GLI3	0
GLI3_Hand2_second_motif.jpwm|GLI3_Hand2_third_motif.jpwm|RF|89	4	100	2.38	1.54253	1.68067	1.05022	0.293615	4	GLI3_Hand2_second_motif	GLI3_Hand2_third_motif	RF	89	GLI3	GLI3	0
GLI3_Hand2_second_motif.jpwm|GLI3_Hand2_third_motif.jpwm|RF|88	2	100	2.19	1.42627	0.913242	-0.133215	0.894024	2	GLI3_Hand2_second_motif	GLI3_Hand2_third_motif	RF	88	GLI3	GLI3	0
GLI3_Hand2_second_motif.jpwm|GLI3_Hand2_third_motif.jpwm|FR|60	5	100	2.16	1.48201	2.31481	1.91631	0.0553254	5	GLI3_Hand2_second_motif	GLI3_Hand2_third_motif	FR	60	GLI3	GLI3	0
GLI3_Hand2_second_motif.jpwm|GLI3_Hand2_third_motif.jpwm|FR|63	1	100	2.75	1.684	0.363636	-1.03919	0.298715	1	GLI3_Hand2_second_motif	GLI3_Hand2_third_motif	FR	63	GLI3	GLI3	0
GLI3_Hand2_second_motif.jpwm|GLI3_Hand2_third_motif.jpwm|FR|62	6	100	2.45	1.43812	2.44898	2.4685	0.0135679	6	GLI3_Hand2_second_motif	GLI3_Hand2_third_motif	FR	62	GLI3	GLI3	0
GLI3_Hand2_second_motif.jpwm|GLI3_Hand2_third_motif.jpwm|FR|64	6	100	2.53	1.81161	2.37154	1.91543	0.0554381	6	GLI3_Hand2_second_motif	GLI3_Hand2_third_motif	FR	64	GLI3	GLI3	0
GLI3_Hand2_second_motif.jpwm|GLI3_Hand2_third_motif.jpwm|FR|67	4	100	2.48	1.57941	1.6129	0.962383	0.335857	4	GLI3_Hand2_second_motif	GLI3_Hand2_third_motif	FR	67	GLI3	GLI3	0
GLI3_Hand2_second_motif.jpwm|GLI3_Hand2_third_motif.jpwm|FR|66	3	100	2.79	1.62241	1.07527	0.129437	0.897012	3	GLI3_Hand2_second_motif	GLI3_Hand2_third_motif	FR	66	GLI3	GLI3	0
GLI3_Hand2_second_motif.jpwm|GLI3_Hand2_third_motif.jpwm|FR|69	4	100	2.5	1.45297	1.6	1.03237	0.301898	4	GLI3_Hand2_second_motif	GLI3_Hand2_third_motif	FR	69	GLI3	GLI3	0
GLI3_Hand2_second_motif.jpwm|GLI3_Hand2_third_motif.jpwm|FF|79	2	100	1.84	1.22037	1.08696	0.131108	0.89569	2	GLI3_Hand2_second_motif	GLI3_Hand2_third_motif	FF	79	GLI3	GLI3	0
GLI3_Hand2_second_motif.jpwm|GLI3_Hand2_third_motif.jpwm|FF|73	1	100	1.84	1.26906	0.543478	-0.661909	0.50803	1	GLI3_Hand2_second_motif	GLI3_Hand2_third_motif	FF	73	GLI3	GLI3	0
GLI3_Hand2_second_motif.jpwm|GLI3_Hand2_third_motif.jpwm|FR|48	6	100	2.67	1.47062	2.24719	2.26435	0.0235527	6	GLI3_Hand2_second_motif	GLI3_Hand2_third_motif	FR	48	GLI3	GLI3	0
GLI3_Hand2_second_motif.jpwm|GLI3_Hand2_third_motif.jpwm|FR|40	10	100	2.63	1.5677	3.80228	4.70116	2.58687e-06	10	GLI3_Hand2_second_motif	GLI3_Hand2_third_motif	FR	40	GLI3	GLI3	0
GLI3_Hand2_second_motif.jpwm|GLI3_Hand2_third_motif.jpwm|FF|-2	2	100	0.83	0.841535	2.40964	1.39032	0.164433	2	GLI3_Hand2_second_motif	GLI3_Hand2_third_motif	FF	-2	GLI3	GLI3	0
GLI3_Hand2_second_motif.jpwm|GLI3_Hand2_third_motif.jpwm|FF|-3	1	100	2.78	1.57365	0.359712	-1.13113	0.258	1	GLI3_Hand2_second_motif	GLI3_Hand2_third_motif	FF	-3	GLI3	GLI3	0
GLI3_Hand2_second_motif.jpwm|GLI3_Hand2_third_motif.jpwm|FF|-4	10	100	16.13	4.45778	0.619963	-1.37512	0.169093	10	GLI3_Hand2_second_motif	GLI3_Hand2_third_motif	FF	-4	GLI3	GLI3	0
GLI3_Hand2_second_motif.jpwm|GLI3_Hand2_third_motif.jpwm|RF|86	3	100	2.31	1.3758	1.2987	0.501526	0.616001	3	GLI3_Hand2_second_motif	GLI3_Hand2_third_motif	RF	86	GLI3	GLI3	0
GLI3_Hand2_second_motif.jpwm|GLI3_Hand2_third_motif.jpwm|FR|59	1	100	2.5	1.51424	0.4	-0.990595	0.321884	1	GLI3_Hand2_second_motif	GLI3_Hand2_third_motif	FR	59	GLI3	GLI3	0
GLI3_Hand2_second_motif.jpwm|GLI3_Hand2_third_motif.jpwm|FR|54	3	100	2.88	1.76544	1.04167	0.0679718	0.945808	3	GLI3_Hand2_second_motif	GLI3_Hand2_third_motif	FR	54	GLI3	GLI3	0
GLI3_Hand2_second_motif.jpwm|GLI3_Hand2_third_motif.jpwm|FR|55	2	100	2.28	1.38593	0.877193	-0.20203	0.839893	2	GLI3_Hand2_second_motif	GLI3_Hand2_third_motif	FR	55	GLI3	GLI3	0
GLI3_Hand2_second_motif.jpwm|GLI3_Hand2_third_motif.jpwm|FR|56	3	100	2.52	1.48038	1.19048	0.324242	0.745755	3	GLI3_Hand2_second_motif	GLI3_Hand2_third_motif	FR	56	GLI3	GLI3	0
GLI3_Hand2_second_motif.jpwm|GLI3_Hand2_third_motif.jpwm|FR|57	4	100	2.28	1.42191	1.75439	1.20964	0.226416	4	GLI3_Hand2_second_motif	GLI3_Hand2_third_motif	FR	57	GLI3	GLI3	0
GLI3_Hand2_second_motif.jpwm|GLI3_Hand2_third_motif.jpwm|FR|50	1	100	2.59	1.59605	0.3861	-0.99621	0.319148	1	GLI3_Hand2_second_motif	GLI3_Hand2_third_motif	FR	50	GLI3	GLI3	0
GLI3_Hand2_second_motif.jpwm|GLI3_Hand2_third_motif.jpwm|FR|51	2	100	2.43	1.51261	0.823045	-0.284277	0.776198	2	GLI3_Hand2_second_motif	GLI3_Hand2_third_motif	FR	51	GLI3	GLI3	0
GLI3_Hand2_second_motif.jpwm|GLI3_Hand2_third_motif.jpwm|FR|52	4	100	2.49	1.68472	1.60643	0.896291	0.370097	4	GLI3_Hand2_second_motif	GLI3_Hand2_third_motif	FR	52	GLI3	GLI3	0
GLI3_Hand2_second_motif.jpwm|GLI3_Hand2_third_motif.jpwm|FR|53	3	100	2.76	1.61508	1.08696	0.148599	0.88187	3	GLI3_Hand2_second_motif	GLI3_Hand2_third_motif	FR	53	GLI3	GLI3	0
GLI3_Hand2_second_motif.jpwm|GLI3_Hand2_third_motif.jpwm|FR|32	4	100	2.73	1.63827	1.4652	0.775206	0.438218	4	GLI3_Hand2_second_motif	GLI3_Hand2_third_motif	FR	32	GLI3	GLI3	0
GLI3_Hand2_second_motif.jpwm|GLI3_Hand2_third_motif.jpwm|FR|33	4	100	2.53	1.81161	1.58103	0.811434	0.417116	4	GLI3_Hand2_second_motif	GLI3_Hand2_third_motif	FR	33	GLI3	GLI3	0
GLI3_Hand2_second_motif.jpwm|GLI3_Hand2_third_motif.jpwm|FR|31	4	100	2.5	1.2988	1.6	1.15492	0.248125	4	GLI3_Hand2_second_motif	GLI3_Hand2_third_motif	FR	31	GLI3	GLI3	0
GLI3_Hand2_second_motif.jpwm|GLI3_Hand2_third_motif.jpwm|RF|37	7	100	2.69	1.39041	2.60223	3.09981	0.00193644	7	GLI3_Hand2_second_motif	GLI3_Hand2_third_motif	RF	37	GLI3	GLI3	0
GLI3_Hand2_second_motif.jpwm|GLI3_Hand2_third_motif.jpwm|FF|8	1	100	2	1.23091	0.5	-0.812404	0.41656	1	GLI3_Hand2_second_motif	GLI3_Hand2_third_motif	FF	8	GLI3	GLI3	0
GLI3_Hand2_second_motif.jpwm|GLI3_Hand2_third_motif.jpwm|FF|9	2	100	2.21	1.55891	0.904977	-0.134709	0.892842	2	GLI3_Hand2_second_motif	GLI3_Hand2_third_motif	FF	9	GLI3	GLI3	0
GLI3_Hand2_second_motif.jpwm|GLI3_Hand2_third_motif.jpwm|FF|2	4	100	2.51	1.53409	1.59363	0.971259	0.331419	4	GLI3_Hand2_second_motif	GLI3_Hand2_third_motif	FF	2	GLI3	GLI3	0
GLI3_Hand2_second_motif.jpwm|GLI3_Hand2_third_motif.jpwm|FF|3	1	100	2.18	1.38082	0.458716	-0.854564	0.392793	1	GLI3_Hand2_second_motif	GLI3_Hand2_third_motif	FF	3	GLI3	GLI3	0
GLI3_Hand2_second_motif.jpwm|GLI3_Hand2_third_motif.jpwm|FF|0	2	100	1.79	1.3802	1.11732	0.152152	0.879067	2	GLI3_Hand2_second_motif	GLI3_Hand2_third_motif	FF	0	GLI3	GLI3	0
GLI3_Hand2_second_motif.jpwm|GLI3_Hand2_third_motif.jpwm|FF|1	6	100	2.23	1.67486	2.69058	2.25094	0.0243896	6	GLI3_Hand2_second_motif	GLI3_Hand2_third_motif	FF	1	GLI3	GLI3	0
GLI3_Hand2_second_motif.jpwm|GLI3_Hand2_third_motif.jpwm|FF|6	4	100	1.83	1.31852	2.18579	1.64579	0.0998071	4	GLI3_Hand2_second_motif	GLI3_Hand2_third_motif	FF	6	GLI3	GLI3	0
GLI3_Hand2_second_motif.jpwm|GLI3_Hand2_third_motif.jpwm|FF|7	3	100	2.18	1.44516	1.37615	0.567412	0.570435	3	GLI3_Hand2_second_motif	GLI3_Hand2_third_motif	FF	7	GLI3	GLI3	0
GLI3_Hand2_second_motif.jpwm|GLI3_Hand2_third_motif.jpwm|FF|4	7	100	2.01	1.37433	3.48259	3.63086	0.000282483	7	GLI3_Hand2_second_motif	GLI3_Hand2_third_motif	FF	4	GLI3	GLI3	0
GLI3_Hand2_second_motif.jpwm|GLI3_Hand2_third_motif.jpwm|FF|5	4	100	2.04	1.4628	1.96078	1.33989	0.180281	4	GLI3_Hand2_second_motif	GLI3_Hand2_third_motif	FF	5	GLI3	GLI3	0
GLI3_Hand2_second_motif.jpwm|GLI3_Hand2_third_motif.jpwm|RF|39	2	100	2.72	1.59595	0.735294	-0.451141	0.651888	2	GLI3_Hand2_second_motif	GLI3_Hand2_third_motif	RF	39	GLI3	GLI3	0
GLI3_Hand2_second_motif.jpwm|GLI3_Hand2_third_motif.jpwm|FR|9	8	100	2.65	1.684	3.01887	3.17696	0.00148828	8	GLI3_Hand2_second_motif	GLI3_Hand2_third_motif	FR	9	GLI3	GLI3	0
GLI3_Hand2_second_motif.jpwm|GLI3_Hand2_third_motif.jpwm|FR|6	3	100	2.81	1.80736	1.06762	0.105125	0.916276	3	GLI3_Hand2_second_motif	GLI3_Hand2_third_motif	FR	6	GLI3	GLI3	0
GLI3_Hand2_second_motif.jpwm|GLI3_Hand2_third_motif.jpwm|FR|7	3	100	2.61	1.49676	1.14943	0.260562	0.79443	3	GLI3_Hand2_second_motif	GLI3_Hand2_third_motif	FR	7	GLI3	GLI3	0
GLI3_Hand2_second_motif.jpwm|GLI3_Hand2_third_motif.jpwm|FR|4	8	100	2.76	1.70632	2.89855	3.07094	0.00213384	8	GLI3_Hand2_second_motif	GLI3_Hand2_third_motif	FR	4	GLI3	GLI3	0
GLI3_Hand2_second_motif.jpwm|GLI3_Hand2_third_motif.jpwm|FR|5	4	100	2.76	1.55128	1.44928	0.799341	0.424093	4	GLI3_Hand2_second_motif	GLI3_Hand2_third_motif	FR	5	GLI3	GLI3	0
GLI3_Hand2_second_motif.jpwm|GLI3_Hand2_third_motif.jpwm|FR|2	5	100	2.67	1.67606	1.87266	1.39016	0.16448	5	GLI3_Hand2_second_motif	GLI3_Hand2_third_motif	FR	2	GLI3	GLI3	0
GLI3_Hand2_second_motif.jpwm|GLI3_Hand2_third_motif.jpwm|FR|3	4	100	2.7	1.48051	1.48148	0.878074	0.379904	4	GLI3_Hand2_second_motif	GLI3_Hand2_third_motif	FR	3	GLI3	GLI3	0
GLI3_Hand2_second_motif.jpwm|GLI3_Hand2_third_motif.jpwm|FR|0	4	100	2.95	1.73132	1.35593	0.606473	0.544201	4	GLI3_Hand2_second_motif	GLI3_Hand2_third_motif	FR	0	GLI3	GLI3	0
GLI3_Hand2_second_motif.jpwm|GLI3_Hand2_third_motif.jpwm|FR|1	8	100	3.04	1.71105	2.63158	2.89881	0.00374579	8	GLI3_Hand2_second_motif	GLI3_Hand2_third_motif	FR	1	GLI3	GLI3	0
GLI3_Hand2_second_motif.jpwm|GLI3_Hand2_third_motif.jpwm|FF|25	3	100	2.17	1.42173	1.38249	0.583796	0.559357	3	GLI3_Hand2_second_motif	GLI3_Hand2_third_motif	FF	25	GLI3	GLI3	0
GLI3_Hand2_second_motif.jpwm|GLI3_Hand2_third_motif.jpwm|FF|24	4	100	2.07	1.48566	1.93237	1.29909	0.193913	4	GLI3_Hand2_second_motif	GLI3_Hand2_third_motif	FF	24	GLI3	GLI3	0
GLI3_Hand2_second_motif.jpwm|GLI3_Hand2_third_motif.jpwm|FF|28	5	100	2.1	1.31426	2.38095	2.20657	0.0273442	5	GLI3_Hand2_second_motif	GLI3_Hand2_third_motif	FF	28	GLI3	GLI3	0
GLI3_Hand2_second_motif.jpwm|GLI3_Hand2_third_motif.jpwm|FR|49	2	100	2.23	1.39157	0.896861	-0.165281	0.868723	2	GLI3_Hand2_second_motif	GLI3_Hand2_third_motif	FR	49	GLI3	GLI3	0
GLI3_Hand2_second_motif.jpwm|GLI3_Hand2_third_motif.jpwm|FR|43	3	100	2.35	1.57233	1.2766	0.413399	0.679314	3	GLI3_Hand2_second_motif	GLI3_Hand2_third_motif	FR	43	GLI3	GLI3	0
GLI3_Hand2_second_motif.jpwm|GLI3_Hand2_third_motif.jpwm|FR|42	5	100	2.52	1.76658	1.98413	1.40384	0.160366	5	GLI3_Hand2_second_motif	GLI3_Hand2_third_motif	FR	42	GLI3	GLI3	0
GLI3_Hand2_second_motif.jpwm|GLI3_Hand2_third_motif.jpwm|FR|47	3	100	2.71	1.72501	1.10701	0.168115	0.866493	3	GLI3_Hand2_second_motif	GLI3_Hand2_third_motif	FR	47	GLI3	GLI3	0
GLI3_Hand2_second_motif.jpwm|GLI3_Hand2_third_motif.jpwm|FR|46	4	100	2.69	1.64958	1.48699	0.794142	0.427113	4	GLI3_Hand2_second_motif	GLI3_Hand2_third_motif	FR	46	GLI3	GLI3	0
GLI3_Hand2_second_motif.jpwm|GLI3_Hand2_third_motif.jpwm|FR|45	4	100	2.58	1.8212	1.55039	0.779706	0.435564	4	GLI3_Hand2_second_motif	GLI3_Hand2_third_motif	FR	45	GLI3	GLI3	0
GLI3_Hand2_second_motif.jpwm|GLI3_Hand2_third_motif.jpwm|FR|44	4	100	2.41	1.51821	1.65975	1.04729	0.294966	4	GLI3_Hand2_second_motif	GLI3_Hand2_third_motif	FR	44	GLI3	GLI3	0
GLI3_Hand2_second_motif.jpwm|GLI3_Hand2_third_motif.jpwm|FR|37	1	100	2.67	1.51794	0.374532	-1.10018	0.271256	1	GLI3_Hand2_second_motif	GLI3_Hand2_third_motif	FR	37	GLI3	GLI3	0
GLI3_Hand2_second_motif.jpwm|GLI3_Hand2_third_motif.jpwm|FR|34	2	100	2.58	1.55817	0.775194	-0.372233	0.70972	2	GLI3_Hand2_second_motif	GLI3_Hand2_third_motif	FR	34	GLI3	GLI3	0
GLI3_Hand2_second_motif.jpwm|GLI3_Hand2_third_motif.jpwm|RF|91	1	100	2.18	1.52673	0.458716	-0.772893	0.439586	1	GLI3_Hand2_second_motif	GLI3_Hand2_third_motif	RF	91	GLI3	GLI3	0
GLI3_Hand2_second_motif.jpwm|GLI3_Hand2_third_motif.jpwm|RF|94	1	100	2.23	1.69285	0.44843	-0.726583	0.467481	1	GLI3_Hand2_second_motif	GLI3_Hand2_third_motif	RF	94	GLI3	GLI3	0
GLI3_Hand2_second_motif.jpwm|GLI3_Hand2_third_motif.jpwm|RF|100	4	100	2.36	1.49423	1.69492	1.09755	0.272399	4	GLI3_Hand2_second_motif	GLI3_Hand2_third_motif	RF	100	GLI3	GLI3	0
GLI3_Hand2_second_motif.jpwm|GLI3_Hand2_third_motif.jpwm|FR|90	3	100	2.29	1.49271	1.31004	0.475645	0.634327	3	GLI3_Hand2_second_motif	GLI3_Hand2_third_motif	FR	90	GLI3	GLI3	0
GLI3_Hand2_second_motif.jpwm|GLI3_Hand2_third_motif.jpwm|FR|94	2	100	2.14	1.4072	0.934579	-0.0994886	0.92075	2	GLI3_Hand2_second_motif	GLI3_Hand2_third_motif	FR	94	GLI3	GLI3	0
GLI3_Hand2_second_motif.jpwm|GLI3_Hand2_third_motif.jpwm|FR|97	3	100	1.77	1.37698	1.69492	0.893262	0.371717	3	GLI3_Hand2_second_motif	GLI3_Hand2_third_motif	FR	97	GLI3	GLI3	0
GLI3_Hand2_second_motif.jpwm|GLI3_Hand2_third_motif.jpwm|RF|-4	10	100	10.3	3.21141	0.970874	-0.093417	0.925572	10	GLI3_Hand2_second_motif	GLI3_Hand2_third_motif	RF	-4	GLI3	GLI3	0
GLI3_Hand2_second_motif.jpwm|GLI3_Hand2_third_motif.jpwm|RF|-1	1	100	0.11	0.314466	9.09091	2.83019	0.00465197	1	GLI3_Hand2_second_motif	GLI3_Hand2_third_motif	RF	-1	GLI3	GLI3	0
GLI3_Hand2_second_motif.jpwm|GLI3_Hand2_third_motif.jpwm|RF|-3	1	100	0.61	0.777135	1.63934	0.501843	0.615778	1	GLI3_Hand2_second_motif	GLI3_Hand2_third_motif	RF	-3	GLI3	GLI3	0
GLI3_Hand2_second_motif.jpwm|GLI3_Hand2_third_motif.jpwm|RF|36	4	100	2.71	1.71914	1.47601	0.750374	0.45303	4	GLI3_Hand2_second_motif	GLI3_Hand2_third_motif	RF	36	GLI3	GLI3	0
GLI3_Hand2_second_motif.jpwm|GLI3_Hand2_third_motif.jpwm|RF|34	4	100	2.46	1.81141	1.62602	0.850166	0.395233	4	GLI3_Hand2_second_motif	GLI3_Hand2_third_motif	RF	34	GLI3	GLI3	0
GLI3_Hand2_second_motif.jpwm|GLI3_Hand2_third_motif.jpwm|RF|35	5	100	3.37	1.72126	1.48368	0.946982	0.343648	5	GLI3_Hand2_second_motif	GLI3_Hand2_third_motif	RF	35	GLI3	GLI3	0
GLI3_Hand2_second_motif.jpwm|GLI3_Hand2_third_motif.jpwm|RF|32	3	100	2.64	1.59241	1.13636	0.226073	0.821145	3	GLI3_Hand2_second_motif	GLI3_Hand2_third_motif	RF	32	GLI3	GLI3	0
GLI3_Hand2_second_motif.jpwm|GLI3_Hand2_third_motif.jpwm|RF|33	4	100	2.37	1.61217	1.68776	1.01106	0.311988	4	GLI3_Hand2_second_motif	GLI3_Hand2_third_motif	RF	33	GLI3	GLI3	0
GLI3_Hand2_second_motif.jpwm|GLI3_Hand2_third_motif.jpwm|RF|30	5	100	2.81	1.76781	1.77936	1.23882	0.215412	5	GLI3_Hand2_second_motif	GLI3_Hand2_third_motif	RF	30	GLI3	GLI3	0
GLI3_Hand2_second_motif.jpwm|GLI3_Hand2_third_motif.jpwm|RF|31	4	100	2.44	1.60378	1.63934	0.9727	0.330702	4	GLI3_Hand2_second_motif	GLI3_Hand2_third_motif	RF	31	GLI3	GLI3	0
GLI3_Hand2_second_motif.jpwm|GLI3_Hand2_third_motif.jpwm|RF|38	4	100	2.62	1.44096	1.52672	0.957695	0.338216	4	GLI3_Hand2_second_motif	GLI3_Hand2_third_motif	RF	38	GLI3	GLI3	0
GLI3_Hand2_second_motif.jpwm|GLI3_Hand2_third_motif.jpwm|FR|91	6	100	2.37	1.52193	2.53165	2.38513	0.0170729	6	GLI3_Hand2_second_motif	GLI3_Hand2_third_motif	FR	91	GLI3	GLI3	0
GLI3_Hand2_second_motif.jpwm|GLI3_Hand2_third_motif.jpwm|FR|92	4	100	2.24	1.61508	1.78571	1.08973	0.275833	4	GLI3_Hand2_second_motif	GLI3_Hand2_third_motif	FR	92	GLI3	GLI3	0
GLI3_Hand2_second_motif.jpwm|GLI3_Hand2_third_motif.jpwm|FR|93	2	100	2.37	1.75611	0.843882	-0.210692	0.833127	2	GLI3_Hand2_second_motif	GLI3_Hand2_third_motif	FR	93	GLI3	GLI3	0
GLI3_Hand2_second_motif.jpwm|GLI3_Hand2_third_motif.jpwm|FR|95	2	100	2.17	1.38575	0.921659	-0.122677	0.902363	2	GLI3_Hand2_second_motif	GLI3_Hand2_third_motif	FR	95	GLI3	GLI3	0
GLI3_Hand2_second_motif.jpwm|GLI3_Hand2_third_motif.jpwm|FR|96	4	100	2.15	1.45904	1.86047	1.26796	0.204812	4	GLI3_Hand2_second_motif	GLI3_Hand2_third_motif	FR	96	GLI3	GLI3	0
GLI3_Hand2_second_motif.jpwm|GLI3_Hand2_third_motif.jpwm|FR|99	4	100	2.15	1.47282	1.86047	1.2561	0.209081	4	GLI3_Hand2_second_motif	GLI3_Hand2_third_motif	FR	99	GLI3	GLI3	0
GLI3_Hand2_second_motif.jpwm|GLI3_Hand2_third_motif.jpwm|RF|25	4	100	2.6	1.63917	1.53846	0.854092	0.393054	4	GLI3_Hand2_second_motif	GLI3_Hand2_third_motif	RF	25	GLI3	GLI3	0
GLI3_Hand2_second_motif.jpwm|GLI3_Hand2_third_motif.jpwm|RF|24	2	100	2.36	1.64851	0.847458	-0.218379	0.827134	2	GLI3_Hand2_second_motif	GLI3_Hand2_third_motif	RF	24	GLI3	GLI3	0
GLI3_Hand2_second_motif.jpwm|GLI3_Hand2_third_motif.jpwm|RF|27	3	100	2.72	1.96987	1.10294	0.142141	0.886969	3	GLI3_Hand2_second_motif	GLI3_Hand2_third_motif	RF	27	GLI3	GLI3	0
GLI3_Hand2_second_motif.jpwm|GLI3_Hand2_third_motif.jpwm|RF|26	2	100	2.97	1.69643	0.673401	-0.571789	0.567465	2	GLI3_Hand2_second_motif	GLI3_Hand2_third_motif	RF	26	GLI3	GLI3	0
GLI3_Hand2_second_motif.jpwm|GLI3_Hand2_third_motif.jpwm|RF|21	2	100	2.9	1.67874	0.689655	-0.536115	0.591879	2	GLI3_Hand2_second_motif	GLI3_Hand2_third_motif	RF	21	GLI3	GLI3	0
GLI3_Hand2_second_motif.jpwm|GLI3_Hand2_third_motif.jpwm|RF|20	2	100	2.71	1.45848	0.738007	-0.486807	0.626395	2	GLI3_Hand2_second_motif	GLI3_Hand2_third_motif	RF	20	GLI3	GLI3	0
GLI3_Hand2_second_motif.jpwm|GLI3_Hand2_third_motif.jpwm|RF|23	6	100	2.55	1.69595	2.35294	2.03425	0.0419262	6	GLI3_Hand2_second_motif	GLI3_Hand2_third_motif	RF	23	GLI3	GLI3	0
GLI3_Hand2_second_motif.jpwm|GLI3_Hand2_third_motif.jpwm|RF|22	1	100	2.77	1.60085	0.361011	-1.10566	0.268873	1	GLI3_Hand2_second_motif	GLI3_Hand2_third_motif	RF	22	GLI3	GLI3	0
GLI3_Hand2_second_motif.jpwm|GLI3_Hand2_third_motif.jpwm|RF|29	4	100	2.34	1.66497	1.7094	0.997016	0.318757	4	GLI3_Hand2_second_motif	GLI3_Hand2_third_motif	RF	29	GLI3	GLI3	0
GLI3_Hand2_second_motif.jpwm|GLI3_Hand2_third_motif.jpwm|RF|28	3	100	2.61	1.85263	1.14943	0.210512	0.833268	3	GLI3_Hand2_second_motif	GLI3_Hand2_third_motif	RF	28	GLI3	GLI3	0
GLI3_Hand2_second_motif.jpwm|GLI3_Hand2_third_motif.jpwm|RF|6	6	100	3.12	1.74819	1.92308	1.64742	0.0994718	6	GLI3_Hand2_second_motif	GLI3_Hand2_third_motif	RF	6	GLI3	GLI3	0
GLI3_Hand2_second_motif.jpwm|GLI3_Hand2_third_motif.jpwm|RF|7	4	100	2.71	1.65935	1.47601	0.777414	0.436915	4	GLI3_Hand2_second_motif	GLI3_Hand2_third_motif	RF	7	GLI3	GLI3	0
GLI3_Hand2_second_motif.jpwm|GLI3_Hand2_third_motif.jpwm|RF|4	8	100	2.57	1.46512	3.11284	3.70619	0.0002104	8	GLI3_Hand2_second_motif	GLI3_Hand2_third_motif	RF	4	GLI3	GLI3	0
GLI3_Hand2_second_motif.jpwm|GLI3_Hand2_third_motif.jpwm|RF|5	3	100	2.53	1.45265	1.18577	0.323546	0.746282	3	GLI3_Hand2_second_motif	GLI3_Hand2_third_motif	RF	5	GLI3	GLI3	0
GLI3_Hand2_second_motif.jpwm|GLI3_Hand2_third_motif.jpwm|RF|2	4	100	2.9	1.71447	1.37931	0.641599	0.521133	4	GLI3_Hand2_second_motif	GLI3_Hand2_third_motif	RF	2	GLI3	GLI3	0
GLI3_Hand2_second_motif.jpwm|GLI3_Hand2_third_motif.jpwm|RF|3	9	100	2.5	1.446	3.6	4.49517	6.95155e-06	8	GLI3_Hand2_second_motif	GLI3_Hand2_third_motif	RF	3	GLI3	GLI3	0
GLI3_Hand2_second_motif.jpwm|GLI3_Hand2_third_motif.jpwm|RF|0	3	100	0.61	0.851558	4.91803	2.80662	0.00500644	3	GLI3_Hand2_second_motif	GLI3_Hand2_third_motif	RF	0	GLI3	GLI3	0
GLI3_Hand2_second_motif.jpwm|GLI3_Hand2_third_motif.jpwm|RF|1	5	100	2.11	1.52352	2.36967	1.89692	0.057838	5	GLI3_Hand2_second_motif	GLI3_Hand2_third_motif	RF	1	GLI3	GLI3	0
GLI3_Hand2_second_motif.jpwm|GLI3_Hand2_third_motif.jpwm|RF|8	7	100	2.6	1.62057	2.69231	2.71509	0.00662586	7	GLI3_Hand2_second_motif	GLI3_Hand2_third_motif	RF	8	GLI3	GLI3	0
GLI3_Hand2_second_motif.jpwm|GLI3_Hand2_third_motif.jpwm|RF|9	4	100	3.01	1.67269	1.3289	0.591862	0.553943	4	GLI3_Hand2_second_motif	GLI3_Hand2_third_motif	RF	9	GLI3	GLI3	0
GLI3_Hand2_second_motif.jpwm|GLI3_Hand2_third_motif.jpwm|FR|89	1	100	2.44	1.55907	0.409836	-0.923626	0.355681	1	GLI3_Hand2_second_motif	GLI3_Hand2_third_motif	FR	89	GLI3	GLI3	0
GLI3_Hand2_second_motif.jpwm|GLI3_Hand2_third_motif.jpwm|FR|88	2	100	2.32	1.37716	0.862069	-0.232362	0.816256	2	GLI3_Hand2_second_motif	GLI3_Hand2_third_motif	FR	88	GLI3	GLI3	0
GLI3_Hand2_second_motif.jpwm|GLI3_Hand2_third_motif.jpwm|FR|87	2	100	2.44	1.67766	0.819672	-0.26227	0.793113	2	GLI3_Hand2_second_motif	GLI3_Hand2_third_motif	FR	87	GLI3	GLI3	0
GLI3_Hand2_second_motif.jpwm|GLI3_Hand2_third_motif.jpwm|FR|86	3	100	2.4	1.66969	1.25	0.359347	0.719335	3	GLI3_Hand2_second_motif	GLI3_Hand2_third_motif	FR	86	GLI3	GLI3	0
GLI3_Hand2_second_motif.jpwm|GLI3_Hand2_third_motif.jpwm|FR|85	5	100	2.35	1.39534	2.12766	1.89918	0.0575407	5	GLI3_Hand2_second_motif	GLI3_Hand2_third_motif	FR	85	GLI3	GLI3	0
GLI3_Hand2_second_motif.jpwm|GLI3_Hand2_third_motif.jpwm|FR|84	3	100	2.33	1.55735	1.28755	0.430217	0.667038	3	GLI3_Hand2_second_motif	GLI3_Hand2_third_motif	FR	84	GLI3	GLI3	0
GLI3_Hand2_second_motif.jpwm|GLI3_Hand2_third_motif.jpwm|FR|83	2	100	1.9	1.30655	1.05263	0.0765375	0.938991	2	GLI3_Hand2_second_motif	GLI3_Hand2_third_motif	FR	83	GLI3	GLI3	0
GLI3_Hand2_second_motif.jpwm|GLI3_Hand2_third_motif.jpwm|FR|82	3	100	2.24	1.37157	1.33929	0.554108	0.579505	3	GLI3_Hand2_second_motif	GLI3_Hand2_third_motif	FR	82	GLI3	GLI3	0
GLI3_Hand2_second_motif.jpwm|GLI3_Hand2_third_motif.jpwm|FR|81	4	100	2.36	1.41792	1.69492	1.15662	0.247427	4	GLI3_Hand2_second_motif	GLI3_Hand2_third_motif	FR	81	GLI3	GLI3	0
GLI3_Hand2_second_motif.jpwm|GLI3_Hand2_third_motif.jpwm|FR|80	4	100	2.26	1.84018	1.76991	0.94556	0.344373	4	GLI3_Hand2_second_motif	GLI3_Hand2_third_motif	FR	80	GLI3	GLI3	0
GLI3_Hand2_second_motif.jpwm|GLI3_Hand2_third_motif.jpwm|FF|65	1	100	1.84	1.16098	0.543478	-0.723526	0.469357	1	GLI3_Hand2_second_motif	GLI3_Hand2_third_motif	FF	65	GLI3	GLI3	0
GLI3_Hand2_second_motif.jpwm|GLI3_Hand2_third_motif.jpwm|FF|66	1	100	2.05	1.36608	0.487805	-0.768625	0.442116	1	GLI3_Hand2_second_motif	GLI3_Hand2_third_motif	FF	66	GLI3	GLI3	0
GLI3_Hand2_second_motif.jpwm|GLI3_Hand2_third_motif.jpwm|FF|63	1	100	1.91	1.39331	0.52356	-0.653121	0.513678	1	GLI3_Hand2_second_motif	GLI3_Hand2_third_motif	FF	63	GLI3	GLI3	0
GLI3_Hand2_second_motif.jpwm|GLI3_Hand2_third_motif.jpwm|RF|10	5	100	2.63	1.36814	1.90114	1.73227	0.0832248	5	GLI3_Hand2_second_motif	GLI3_Hand2_third_motif	RF	10	GLI3	GLI3	0
GLI3_Hand2_second_motif.jpwm|GLI3_Hand2_third_motif.jpwm|RF|11	3	100	2.78	1.64887	1.07914	0.133424	0.893858	3	GLI3_Hand2_second_motif	GLI3_Hand2_third_motif	RF	11	GLI3	GLI3	0
GLI3_Hand2_second_motif.jpwm|GLI3_Hand2_third_motif.jpwm|RF|12	3	100	2.84	2.03366	1.05634	0.078676	0.93729	3	GLI3_Hand2_second_motif	GLI3_Hand2_third_motif	RF	12	GLI3	GLI3	0
GLI3_Hand2_second_motif.jpwm|GLI3_Hand2_third_motif.jpwm|RF|13	2	100	2.68	1.68703	0.746269	-0.403076	0.686892	2	GLI3_Hand2_second_motif	GLI3_Hand2_third_motif	RF	13	GLI3	GLI3	0
GLI3_Hand2_second_motif.jpwm|GLI3_Hand2_third_motif.jpwm|RF|14	7	100	2.63	1.61842	2.6616	2.70016	0.00693063	7	GLI3_Hand2_second_motif	GLI3_Hand2_third_motif	RF	14	GLI3	GLI3	0
GLI3_Hand2_second_motif.jpwm|GLI3_Hand2_third_motif.jpwm|RF|15	4	100	2.49	1.3521	1.60643	1.11678	0.264089	4	GLI3_Hand2_second_motif	GLI3_Hand2_third_motif	RF	15	GLI3	GLI3	0
GLI3_Hand2_second_motif.jpwm|GLI3_Hand2_third_motif.jpwm|RF|16	1	100	2.51	1.55372	0.398406	-0.971862	0.331119	1	GLI3_Hand2_second_motif	GLI3_Hand2_third_motif	RF	16	GLI3	GLI3	0
GLI3_Hand2_second_motif.jpwm|GLI3_Hand2_third_motif.jpwm|FF|93	4	100	1.83	1.44987	2.18579	1.49669	0.134475	4	GLI3_Hand2_second_motif	GLI3_Hand2_third_motif	FF	93	GLI3	GLI3	0
GLI3_Hand2_second_motif.jpwm|GLI3_Hand2_third_motif.jpwm|RF|18	1	100	2.9	1.81742	0.344828	-1.04544	0.295822	1	GLI3_Hand2_second_motif	GLI3_Hand2_third_motif	RF	18	GLI3	GLI3	0
GLI3_Hand2_second_motif.jpwm|GLI3_Hand2_third_motif.jpwm|RF|19	5	100	2.64	1.63002	1.89394	1.44783	0.147664	5	GLI3_Hand2_second_motif	GLI3_Hand2_third_motif	RF	19	GLI3	GLI3	0
GLI3_Hand2_second_motif.jpwm|GLI3_Hand2_third_motif.jpwm|FF|98	2	100	1.81	1.31576	1.10497	0.144404	0.885182	2	GLI3_Hand2_second_motif	GLI3_Hand2_third_motif	FF	98	GLI3	GLI3	0
GLI3_Hand2_second_motif.jpwm|GLI3_Hand2_third_motif.jpwm|FF|99	6	100	1.6	1.28708	3.75	3.4186	0.000629441	6	GLI3_Hand2_second_motif	GLI3_Hand2_third_motif	FF	99	GLI3	GLI3	0
GLI3_Hand2_second_motif.jpwm|GLI3_Hand2_third_motif.jpwm|FF|78	1	100	2.04	1.30979	0.490196	-0.794019	0.427184	1	GLI3_Hand2_second_motif	GLI3_Hand2_third_motif	FF	78	GLI3	GLI3	0
GLI3_Hand2_second_motif.jpwm|GLI3_Hand2_third_motif.jpwm|FF|76	2	100	2.1	1.66667	0.952381	-0.06	0.952156	2	GLI3_Hand2_second_motif	GLI3_Hand2_third_motif	FF	76	GLI3	GLI3	0
GLI3_Hand2_second_motif.jpwm|GLI3_Hand2_third_motif.jpwm|FF|77	5	100	2.03	1.50726	2.46305	1.97047	0.0487846	5	GLI3_Hand2_second_motif	GLI3_Hand2_third_motif	FF	77	GLI3	GLI3	0
GLI3_Hand2_second_motif.jpwm|GLI3_Hand2_third_motif.jpwm|FF|74	3	100	1.83	1.44987	1.63934	0.806969	0.419684	3	GLI3_Hand2_second_motif	GLI3_Hand2_third_motif	FF	74	GLI3	GLI3	0
GLI3_Hand2_second_motif.jpwm|GLI3_Hand2_third_motif.jpwm|FF|75	3	100	1.8	1.3633	1.66667	0.880217	0.378742	3	GLI3_Hand2_second_motif	GLI3_Hand2_third_motif	FF	75	GLI3	GLI3	0
GLI3_Hand2_second_motif.jpwm|GLI3_Hand2_third_motif.jpwm|FF|72	2	100	1.97	1.42457	1.01523	0.021059	0.983199	2	GLI3_Hand2_second_motif	GLI3_Hand2_third_motif	FF	72	GLI3	GLI3	0
GLI3_Hand2_second_motif.jpwm|GLI3_Hand2_third_motif.jpwm|FF|70	4	100	1.8	1.33333	2.22222	1.65	0.0989429	4	GLI3_Hand2_second_motif	GLI3_Hand2_third_motif	FF	70	GLI3	GLI3	0
GLI3_Hand2_second_motif.jpwm|GLI3_Hand2_third_motif.jpwm|FF|71	3	100	1.75	1.40974	1.71429	0.886687	0.375248	3	GLI3_Hand2_second_motif	GLI3_Hand2_third_motif	FF	71	GLI3	GLI3	0
GLI3_Hand2_second_motif.jpwm|GLI3_Hand2_third_motif.jpwm|FR|25	5	100	3	1.65145	1.66667	1.21106	0.225872	5	GLI3_Hand2_second_motif	GLI3_Hand2_third_motif	FR	25	GLI3	GLI3	0
GLI3_Hand2_second_motif.jpwm|GLI3_Hand2_third_motif.jpwm|FR|24	2	100	2.7	1.74946	0.740741	-0.400124	0.689065	2	GLI3_Hand2_second_motif	GLI3_Hand2_third_motif	FR	24	GLI3	GLI3	0
GLI3_Hand2_second_motif.jpwm|GLI3_Hand2_third_motif.jpwm|FR|27	4	100	2.69	1.47501	1.48699	0.888129	0.374471	4	GLI3_Hand2_second_motif	GLI3_Hand2_third_motif	FR	27	GLI3	GLI3	0
GLI3_Hand2_second_motif.jpwm|GLI3_Hand2_third_motif.jpwm|FF|83	1	100	1.99	1.51421	0.502513	-0.653807	0.513236	1	GLI3_Hand2_second_motif	GLI3_Hand2_third_motif	FF	83	GLI3	GLI3	0
GLI3_Hand2_second_motif.jpwm|GLI3_Hand2_third_motif.jpwm|FF|82	2	100	1.99	1.47364	1.00503	0.00678592	0.994586	2	GLI3_Hand2_second_motif	GLI3_Hand2_third_motif	FF	82	GLI3	GLI3	0
GLI3_Hand2_second_motif.jpwm|GLI3_Hand2_third_motif.jpwm|FF|81	4	100	1.88	1.38009	2.12766	1.53613	0.124506	4	GLI3_Hand2_second_motif	GLI3_Hand2_third_motif	FF	81	GLI3	GLI3	0
GLI3_Hand2_second_motif.jpwm|GLI3_Hand2_third_motif.jpwm|FF|87	2	100	1.78	1.46736	1.1236	0.14993	0.88082	2	GLI3_Hand2_second_motif	GLI3_Hand2_third_motif	FF	87	GLI3	GLI3	0
GLI3_Hand2_second_motif.jpwm|GLI3_Hand2_third_motif.jpwm|FF|86	3	100	1.69	1.2366	1.77515	1.05935	0.289439	3	GLI3_Hand2_second_motif	GLI3_Hand2_third_motif	FF	86	GLI3	GLI3	0
GLI3_Hand2_second_motif.jpwm|GLI3_Hand2_third_motif.jpwm|FF|85	1	100	1.84	1.3463	0.543478	-0.623932	0.532672	1	GLI3_Hand2_second_motif	GLI3_Hand2_third_motif	FF	85	GLI3	GLI3	0
GLI3_Hand2_second_motif.jpwm|GLI3_Hand2_third_motif.jpwm|FF|84	3	100	2.16	1.48881	1.38889	0.564208	0.572613	3	GLI3_Hand2_second_motif	GLI3_Hand2_third_motif	FF	84	GLI3	GLI3	0
GLI3_Hand2_second_motif.jpwm|GLI3_Hand2_third_motif.jpwm|FF|89	4	100	1.86	1.30283	2.15054	1.64257	0.100471	4	GLI3_Hand2_second_motif	GLI3_Hand2_third_motif	FF	89	GLI3	GLI3	0
GLI3_Hand2_second_motif.jpwm|GLI3_Hand2_third_motif.jpwm|FF|88	4	100	1.92	1.33091	2.08333	1.56284	0.118089	4	GLI3_Hand2_second_motif	GLI3_Hand2_third_motif	FF	88	GLI3	GLI3	0
GLI3_Hand2_second_motif.jpwm|GLI3_Hand2_third_motif.jpwm|FF|69	1	100	1.98	1.27905	0.505051	-0.766196	0.44356	1	GLI3_Hand2_second_motif	GLI3_Hand2_third_motif	FF	69	GLI3	GLI3	0
GLI3_Hand2_second_motif.jpwm|GLI3_Hand2_third_motif.jpwm|FF|68	3	100	1.95	1.20918	1.53846	0.868356	0.3852	3	GLI3_Hand2_second_motif	GLI3_Hand2_third_motif	FF	68	GLI3	GLI3	0
GLI3_Hand2_second_motif.jpwm|GLI3_Hand2_third_motif.jpwm|FF|64	1	100	1.83	1.41461	0.546448	-0.586736	0.557381	1	GLI3_Hand2_second_motif	GLI3_Hand2_third_motif	FF	64	GLI3	GLI3	0
GLI3_Hand2_second_motif.jpwm|GLI3_Hand2_third_motif.jpwm|FF|67	4	100	2	1.42843	2	1.40014	0.161471	4	GLI3_Hand2_second_motif	GLI3_Hand2_third_motif	FF	67	GLI3	GLI3	0
GLI3_Hand2_second_motif.jpwm|GLI3_Hand2_third_motif.jpwm|FF|61	5	100	1.99	1.49406	2.51256	2.01464	0.0439422	5	GLI3_Hand2_second_motif	GLI3_Hand2_third_motif	FF	61	GLI3	GLI3	0
GLI3_Hand2_second_motif.jpwm|GLI3_Hand2_third_motif.jpwm|FF|60	1	100	1.89	1.3096	0.529101	-0.679597	0.49676	1	GLI3_Hand2_second_motif	GLI3_Hand2_third_motif	FF	60	GLI3	GLI3	0
GLI3_Hand2_second_motif.jpwm|GLI3_Hand2_third_motif.jpwm|FF|62	2	100	1.83	1.29533	1.0929	0.131241	0.895585	2	GLI3_Hand2_second_motif	GLI3_Hand2_third_motif	FF	62	GLI3	GLI3	0
GLI3_Hand2_second_motif.jpwm|GLI3_Hand2_third_motif.jpwm|RF|90	2	100	2.25	1.55943	0.888889	-0.160315	0.872633	2	GLI3_Hand2_second_motif	GLI3_Hand2_third_motif	RF	90	GLI3	GLI3	0
GLI3_Hand2_second_motif.jpwm|GLI3_Hand2_third_motif.jpwm|RF|92	2	100	2.4	1.70561	0.833333	-0.234521	0.814581	2	GLI3_Hand2_second_motif	GLI3_Hand2_third_motif	RF	92	GLI3	GLI3	0
GLI3_Hand2_second_motif.jpwm|GLI3_Hand2_third_motif.jpwm|FF|17	2	100	2.26	1.58031	0.884956	-0.164525	0.869318	2	GLI3_Hand2_second_motif	GLI3_Hand2_third_motif	FF	17	GLI3	GLI3	0
GLI3_Hand2_second_motif.jpwm|GLI3_Hand2_third_motif.jpwm|FF|11	2	100	2.23	1.59453	0.896861	-0.144243	0.885308	2	GLI3_Hand2_second_motif	GLI3_Hand2_third_motif	FF	11	GLI3	GLI3	0
GLI3_Hand2_second_motif.jpwm|GLI3_Hand2_third_motif.jpwm|RF|96	1	100	1.96	1.43492	0.510204	-0.669028	0.503478	1	GLI3_Hand2_second_motif	GLI3_Hand2_third_motif	RF	96	GLI3	GLI3	0
GLI3_Hand2_second_motif.jpwm|GLI3_Hand2_third_motif.jpwm|RF|97	2	100	2.22	1.41121	0.900901	-0.155895	0.876116	2	GLI3_Hand2_second_motif	GLI3_Hand2_third_motif	RF	97	GLI3	GLI3	0
GLI3_Hand2_second_motif.jpwm|GLI3_Hand2_third_motif.jpwm|RF|78	1	100	2.27	1.43446	0.440529	-0.88535	0.375968	1	GLI3_Hand2_second_motif	GLI3_Hand2_third_motif	RF	78	GLI3	GLI3	0
GLI3_Hand2_second_motif.jpwm|GLI3_Hand2_third_motif.jpwm|RF|79	1	100	2.32	1.65682	0.431034	-0.796707	0.425621	1	GLI3_Hand2_second_motif	GLI3_Hand2_third_motif	RF	79	GLI3	GLI3	0
GLI3_Hand2_second_motif.jpwm|GLI3_Hand2_third_motif.jpwm|RF|72	4	100	2.43	1.46512	1.64609	1.07159	0.283905	4	GLI3_Hand2_second_motif	GLI3_Hand2_third_motif	RF	72	GLI3	GLI3	0
GLI3_Hand2_second_motif.jpwm|GLI3_Hand2_third_motif.jpwm|RF|73	4	100	2.49	1.59858	1.60643	0.944589	0.344869	4	GLI3_Hand2_second_motif	GLI3_Hand2_third_motif	RF	73	GLI3	GLI3	0
GLI3_Hand2_second_motif.jpwm|GLI3_Hand2_third_motif.jpwm|RF|70	3	100	2.09	1.38604	1.43541	0.656546	0.511473	3	GLI3_Hand2_second_motif	GLI3_Hand2_third_motif	RF	70	GLI3	GLI3	0
GLI3_Hand2_second_motif.jpwm|GLI3_Hand2_third_motif.jpwm|RF|76	5	100	2.21	1.53277	2.26244	1.82023	0.068724	5	GLI3_Hand2_second_motif	GLI3_Hand2_third_motif	RF	76	GLI3	GLI3	0
GLI3_Hand2_second_motif.jpwm|GLI3_Hand2_third_motif.jpwm|RF|77	2	100	2.04	1.43492	0.980392	-0.0278762	0.977761	2	GLI3_Hand2_second_motif	GLI3_Hand2_third_motif	RF	77	GLI3	GLI3	0
GLI3_Hand2_second_motif.jpwm|GLI3_Hand2_third_motif.jpwm|RF|74	11	100	2.43	1.42315	4.52675	6.02186	1.72428e-09	11	GLI3_Hand2_second_motif	GLI3_Hand2_third_motif	RF	74	GLI3	GLI3	0
GLI3_Hand2_second_motif.jpwm|GLI3_Hand2_third_motif.jpwm|RF|75	3	100	2.28	1.58325	1.31579	0.454762	0.64928	3	GLI3_Hand2_second_motif	GLI3_Hand2_third_motif	RF	75	GLI3	GLI3	0
GLI3_Hand2_second_motif.jpwm|GLI3_Hand2_third_motif.jpwm|FF|58	1	100	1.83	1.57669	0.546448	-0.526418	0.598598	1	GLI3_Hand2_second_motif	GLI3_Hand2_third_motif	FF	58	GLI3	GLI3	0
GLI3_Hand2_second_motif.jpwm|GLI3_Hand2_third_motif.jpwm|FF|59	1	100	1.89	1.25445	0.529101	-0.709476	0.478029	1	GLI3_Hand2_second_motif	GLI3_Hand2_third_motif	FF	59	GLI3	GLI3	0
GLI3_Hand2_second_motif.jpwm|GLI3_Hand2_third_motif.jpwm|FF|50	5	100	1.99	1.41774	2.51256	2.12309	0.0337463	5	GLI3_Hand2_second_motif	GLI3_Hand2_third_motif	FF	50	GLI3	GLI3	0
GLI3_Hand2_second_motif.jpwm|GLI3_Hand2_third_motif.jpwm|FR|58	4	100	2.3	1.58592	1.73913	1.07193	0.283751	4	GLI3_Hand2_second_motif	GLI3_Hand2_third_motif	FR	58	GLI3	GLI3	0
GLI3_Hand2_second_motif.jpwm|GLI3_Hand2_third_motif.jpwm|FF|52	1	100	2.19	1.36104	0.456621	-0.874333	0.381937	1	GLI3_Hand2_second_motif	GLI3_Hand2_third_motif	FF	52	GLI3	GLI3	0
GLI3_Hand2_second_motif.jpwm|GLI3_Hand2_third_motif.jpwm|FF|53	4	100	1.85	1.5333	2.16216	1.4022	0.160854	4	GLI3_Hand2_second_motif	GLI3_Hand2_third_motif	FF	53	GLI3	GLI3	0
GLI3_Hand2_second_motif.jpwm|GLI3_Hand2_third_motif.jpwm|FF|55	1	100	2.02	1.62667	0.49505	-0.627047	0.530628	1	GLI3_Hand2_second_motif	GLI3_Hand2_third_motif	FF	55	GLI3	GLI3	0
GLI3_Hand2_second_motif.jpwm|GLI3_Hand2_third_motif.jpwm|FF|56	2	100	1.91	1.34911	1.04712	0.0667106	0.946812	2	GLI3_Hand2_second_motif	GLI3_Hand2_third_motif	FF	56	GLI3	GLI3	0
GLI3_Hand2_second_motif.jpwm|GLI3_Hand2_third_motif.jpwm|FR|38	5	100	2.63	1.63086	1.90114	1.45322	0.146162	5	GLI3_Hand2_second_motif	GLI3_Hand2_third_motif	FR	38	GLI3	GLI3	0
GLI3_Hand2_second_motif.jpwm|GLI3_Hand2_third_motif.jpwm|FR|39	3	100	2.27	1.53646	1.32159	0.475118	0.634703	3	GLI3_Hand2_second_motif	GLI3_Hand2_third_motif	FR	39	GLI3	GLI3	0
GLI3_Hand2_second_motif.jpwm|GLI3_Hand2_third_motif.jpwm|FR|36	2	100	2.65	1.59149	0.754717	-0.408423	0.682963	2	GLI3_Hand2_second_motif	GLI3_Hand2_third_motif	FR	36	GLI3	GLI3	0
GLI3_Hand2_second_motif.jpwm|GLI3_Hand2_third_motif.jpwm|FR|35	5	100	2.47	1.63581	2.02429	1.54664	0.12195	5	GLI3_Hand2_second_motif	GLI3_Hand2_third_motif	FR	35	GLI3	GLI3	0
GLI3_Hand2_second_motif.jpwm|GLI3_Hand2_third_motif.jpwm|FR|30	4	100	2.83	1.7	1.41343	0.688235	0.491305	4	GLI3_Hand2_second_motif	GLI3_Hand2_third_motif	FR	30	GLI3	GLI3	0
GLI3_Hand2_second_motif.jpwm|GLI3_Hand2_third_motif.jpwm|RF|68	8	100	2.15	1.26631	3.72093	4.61973	3.8424e-06	8	GLI3_Hand2_second_motif	GLI3_Hand2_third_motif	RF	68	GLI3	GLI3	0
GLI3_Hand2_second_motif.jpwm|GLI3_Hand2_third_motif.jpwm|RF|61	2	100	2.59	1.58971	0.772201	-0.371137	0.710535	2	GLI3_Hand2_second_motif	GLI3_Hand2_third_motif	RF	61	GLI3	GLI3	0
GLI3_Hand2_second_motif.jpwm|GLI3_Hand2_third_motif.jpwm|RF|60	4	100	2.46	1.80583	1.62602	0.852795	0.393773	4	GLI3_Hand2_second_motif	GLI3_Hand2_third_motif	RF	60	GLI3	GLI3	0
GLI3_Hand2_second_motif.jpwm|GLI3_Hand2_third_motif.jpwm|RF|63	1	100	2.35	1.71961	0.425532	-0.78506	0.432418	1	GLI3_Hand2_second_motif	GLI3_Hand2_third_motif	RF	63	GLI3	GLI3	0
GLI3_Hand2_second_motif.jpwm|GLI3_Hand2_third_motif.jpwm|RF|62	13	100	2.32	1.65682	5.60345	6.44609	1.14776e-10	13	GLI3_Hand2_second_motif	GLI3_Hand2_third_motif	RF	62	GLI3	GLI3	0
GLI3_Hand2_second_motif.jpwm|GLI3_Hand2_third_motif.jpwm|RF|65	8	100	2.32	1.64458	3.44828	3.45377	0.000552814	8	GLI3_Hand2_second_motif	GLI3_Hand2_third_motif	RF	65	GLI3	GLI3	0
GLI3_Hand2_second_motif.jpwm|GLI3_Hand2_third_motif.jpwm|RF|64	1	100	2.46	1.55972	0.406504	-0.936065	0.34924	1	GLI3_Hand2_second_motif	GLI3_Hand2_third_motif	RF	64	GLI3	GLI3	0
GLI3_Hand2_second_motif.jpwm|GLI3_Hand2_third_motif.jpwm|RF|66	6	100	2.25	1.57874	2.66667	2.37531	0.0175342	6	GLI3_Hand2_second_motif	GLI3_Hand2_third_motif	RF	66	GLI3	GLI3	0
GLI3_Hand2_second_motif.jpwm|GLI3_Hand2_third_motif.jpwm|FF|47	1	100	2	1.40705	0.5	-0.710705	0.477267	1	GLI3_Hand2_second_motif	GLI3_Hand2_third_motif	FF	47	GLI3	GLI3	0
GLI3_Hand2_second_motif.jpwm|GLI3_Hand2_third_motif.jpwm|FF|46	3	100	2.02	1.40691	1.48515	0.696562	0.486077	3	GLI3_Hand2_second_motif	GLI3_Hand2_third_motif	FF	46	GLI3	GLI3	0
GLI3_Hand2_second_motif.jpwm|GLI3_Hand2_third_motif.jpwm|FF|45	3	100	2.22	1.55427	1.35135	0.501843	0.615778	3	GLI3_Hand2_second_motif	GLI3_Hand2_third_motif	FF	45	GLI3	GLI3	0
GLI3_Hand2_second_motif.jpwm|GLI3_Hand2_third_motif.jpwm|FF|44	6	100	1.97	1.42457	3.04569	2.82893	0.00467042	6	GLI3_Hand2_second_motif	GLI3_Hand2_third_motif	FF	44	GLI3	GLI3	0
GLI3_Hand2_second_motif.jpwm|GLI3_Hand2_third_motif.jpwm|FF|43	1	100	2.16	1.39783	0.462963	-0.829855	0.406621	1	GLI3_Hand2_second_motif	GLI3_Hand2_third_motif	FF	43	GLI3	GLI3	0
GLI3_Hand2_second_motif.jpwm|GLI3_Hand2_third_motif.jpwm|FF|41	3	100	2.21	1.40917	1.35747	0.560614	0.575061	3	GLI3_Hand2_second_motif	GLI3_Hand2_third_motif	FF	41	GLI3	GLI3	0
GLI3_Hand2_second_motif.jpwm|GLI3_Hand2_third_motif.jpwm|FF|40	4	100	1.86	1.16359	2.15054	1.83914	0.065895	4	GLI3_Hand2_second_motif	GLI3_Hand2_third_motif	FF	40	GLI3	GLI3	0
GLI3_Hand2_second_motif.jpwm|GLI3_Hand2_third_motif.jpwm|FF|49	2	100	2.01	1.49406	0.995025	-0.00669316	0.99466	2	GLI3_Hand2_second_motif	GLI3_Hand2_third_motif	FF	49	GLI3	GLI3	0
GLI3_Hand2_second_motif.jpwm|GLI3_Hand2_third_motif.jpwm|FF|48	2	100	2.08	1.48174	0.961538	-0.0539906	0.956943	2	GLI3_Hand2_second_motif	GLI3_Hand2_third_motif	FF	48	GLI3	GLI3	0
GLI3_Hand2_second_motif.jpwm|GLI3_Hand2_third_motif.jpwm|FF|12	2	100	2.13	1.3533	0.938967	-0.0960617	0.923472	2	GLI3_Hand2_second_motif	GLI3_Hand2_third_motif	FF	12	GLI3	GLI3	0
GLI3_Hand2_second_motif.jpwm|GLI3_Hand2_third_motif.jpwm|FF|34	3	100	2.18	1.47285	1.37615	0.556743	0.577703	3	GLI3_Hand2_second_motif	GLI3_Hand2_third_motif	FF	34	GLI3	GLI3	0
GLI3_Hand2_second_motif.jpwm|GLI3_Hand2_third_motif.jpwm|FF|38	3	100	2.17	1.40025	1.38249	0.59275	0.553348	3	GLI3_Hand2_second_motif	GLI3_Hand2_third_motif	FF	38	GLI3	GLI3	0
GLI3_Hand2_second_motif.jpwm|GLI3_Hand2_third_motif.jpwm|FF|39	3	100	2.58	1.83226	1.16279	0.229225	0.818694	3	GLI3_Hand2_second_motif	GLI3_Hand2_third_motif	FF	39	GLI3	GLI3	0
GLI3_Hand2_second_motif.jpwm|GLI3_Hand2_third_motif.jpwm|FR|29	5	100	2.64	1.59874	1.89394	1.47617	0.1399	5	GLI3_Hand2_second_motif	GLI3_Hand2_third_motif	FR	29	GLI3	GLI3	0
GLI3_Hand2_second_motif.jpwm|GLI3_Hand2_third_motif.jpwm|FR|28	1	100	2.62	1.46184	0.381679	-1.10819	0.267778	1	GLI3_Hand2_second_motif	GLI3_Hand2_third_motif	FR	28	GLI3	GLI3	0
GLI3_Hand2_second_motif.jpwm|GLI3_Hand2_third_motif.jpwm|FR|26	8	100	2.76	1.78727	2.89855	2.93184	0.00336959	8	GLI3_Hand2_second_motif	GLI3_Hand2_third_motif	FR	26	GLI3	GLI3	0
GLI3_Hand2_second_motif.jpwm|GLI3_Hand2_third_motif.jpwm|FR|21	8	100	2.74	1.72105	2.91971	3.05627	0.00224109	8	GLI3_Hand2_second_motif	GLI3_Hand2_third_motif	FR	21	GLI3	GLI3	0
GLI3_Hand2_second_motif.jpwm|GLI3_Hand2_third_motif.jpwm|FR|20	1	100	2.57	1.51261	0.389105	-1.03794	0.299297	1	GLI3_Hand2_second_motif	GLI3_Hand2_third_motif	FR	20	GLI3	GLI3	0
GLI3_Hand2_second_motif.jpwm|GLI3_Hand2_third_motif.jpwm|FR|23	6	100	2.85	1.82228	2.10526	1.7286	0.0838802	6	GLI3_Hand2_second_motif	GLI3_Hand2_third_motif	FR	23	GLI3	GLI3	0
GLI3_Hand2_second_motif.jpwm|GLI3_Hand2_third_motif.jpwm|FR|61	1	100	2.41	1.53145	0.414938	-0.920693	0.357211	1	GLI3_Hand2_second_motif	GLI3_Hand2_third_motif	FR	61	GLI3	GLI3	0
GLI3_Hand2_second_motif.jpwm|GLI3_Hand2_third_motif.jpwm|RF|54	9	100	2.45	1.58513	3.67347	4.13216	3.59367e-05	9	GLI3_Hand2_second_motif	GLI3_Hand2_third_motif	RF	54	GLI3	GLI3	0
GLI3_Hand2_second_motif.jpwm|GLI3_Hand2_third_motif.jpwm|RF|55	2	100	2.66	1.57775	0.75188	-0.418317	0.675715	2	GLI3_Hand2_second_motif	GLI3_Hand2_third_motif	RF	55	GLI3	GLI3	0
GLI3_Hand2_second_motif.jpwm|GLI3_Hand2_third_motif.jpwm|RF|56	2	100	2.36	1.47381	0.847458	-0.244265	0.807026	2	GLI3_Hand2_second_motif	GLI3_Hand2_third_motif	RF	56	GLI3	GLI3	0
GLI3_Hand2_second_motif.jpwm|GLI3_Hand2_third_motif.jpwm|RF|57	3	100	2.2	1.62057	1.36364	0.493652	0.621552	3	GLI3_Hand2_second_motif	GLI3_Hand2_third_motif	RF	57	GLI3	GLI3	0
GLI3_Hand2_second_motif.jpwm|GLI3_Hand2_third_motif.jpwm|RF|50	6	100	2.69	1.54197	2.23048	2.1466	0.031825	6	GLI3_Hand2_second_motif	GLI3_Hand2_third_motif	RF	50	GLI3	GLI3	0
GLI3_Hand2_second_motif.jpwm|GLI3_Hand2_third_motif.jpwm|RF|51	2	100	2.49	1.51421	0.803213	-0.323601	0.74624	2	GLI3_Hand2_second_motif	GLI3_Hand2_third_motif	RF	51	GLI3	GLI3	0
GLI3_Hand2_second_motif.jpwm|GLI3_Hand2_third_motif.jpwm|RF|52	4	100	2.52	1.45976	1.5873	1.01386	0.310648	4	GLI3_Hand2_second_motif	GLI3_Hand2_third_motif	RF	52	GLI3	GLI3	0
GLI3_Hand2_second_motif.jpwm|GLI3_Hand2_third_motif.jpwm|RF|53	1	100	2.38	1.83005	0.420168	-0.754077	0.450803	1	GLI3_Hand2_second_motif	GLI3_Hand2_third_motif	RF	53	GLI3	GLI3	0
GLI3_Hand2_second_motif.jpwm|GLI3_Hand2_third_motif.jpwm|RF|58	11	100	2.39	1.59478	4.60251	5.39885	6.70683e-08	11	GLI3_Hand2_second_motif	GLI3_Hand2_third_motif	RF	58	GLI3	GLI3	0
GLI3_Hand2_second_motif.jpwm|GLI3_Hand2_third_motif.jpwm|RF|59	5	100	2.42	1.70074	2.06612	1.51698	0.129271	5	GLI3_Hand2_second_motif	GLI3_Hand2_third_motif	RF	59	GLI3	GLI3	0
GLI3_Hand2_second_motif.jpwm|GLI3_Hand2_third_motif.jpwm|FF|32	4	100	2.33	1.60211	1.71674	1.04237	0.297239	4	GLI3_Hand2_second_motif	GLI3_Hand2_third_motif	FF	32	GLI3	GLI3	0
GLI3_Hand2_second_motif.jpwm|GLI3_Hand2_third_motif.jpwm|FF|33	1	100	2.12	1.37275	0.471698	-0.81588	0.414569	1	GLI3_Hand2_second_motif	GLI3_Hand2_third_motif	FF	33	GLI3	GLI3	0
GLI3_Hand2_second_motif.jpwm|GLI3_Hand2_third_motif.jpwm|FF|30	4	100	2.09	1.34911	1.91388	1.41575	0.15685	3	GLI3_Hand2_second_motif	GLI3_Hand2_third_motif	FF	30	GLI3	GLI3	0
GLI3_Hand2_second_motif.jpwm|GLI3_Hand2_third_motif.jpwm|FF|31	4	100	2.27	1.49649	1.76211	1.15604	0.247667	4	GLI3_Hand2_second_motif	GLI3_Hand2_third_motif	FF	31	GLI3	GLI3	0
GLI3_Hand2_second_motif.jpwm|GLI3_Hand2_third_motif.jpwm|FF|36	4	100	1.93	1.40888	2.07254	1.46925	0.141765	4	GLI3_Hand2_second_motif	GLI3_Hand2_third_motif	FF	36	GLI3	GLI3	0
GLI3_Hand2_second_motif.jpwm|GLI3_Hand2_third_motif.jpwm|FF|37	4	100	1.83	1.49108	2.18579	1.45532	0.145582	4	GLI3_Hand2_second_motif	GLI3_Hand2_third_motif	FF	37	GLI3	GLI3	0
GLI3_Hand2_second_motif.jpwm|GLI3_Hand2_third_motif.jpwm|FF|35	1	100	2.12	1.43041	0.471698	-0.782995	0.43363	1	GLI3_Hand2_second_motif	GLI3_Hand2_third_motif	FF	35	GLI3	GLI3	0
GLI3_Hand2_second_motif.jpwm|GLI3_Hand2_third_motif.jpwm|FR|65	3	100	2.53	1.50726	1.18577	0.311825	0.755173	3	GLI3_Hand2_second_motif	GLI3_Hand2_third_motif	FR	65	GLI3	GLI3	0
GLI3_Hand2_second_motif.jpwm|GLI3_Hand2_third_motif.jpwm|FR|75	6	100	2.44	1.67163	2.45902	2.12966	0.0331998	6	GLI3_Hand2_second_motif	GLI3_Hand2_third_motif	FR	75	GLI3	GLI3	0
GLI3_Hand2_second_motif.jpwm|GLI3_Hand2_third_motif.jpwm|FR|-4	1	100	1.09	0.975405	0.917431	-0.0922694	0.926484	1	GLI3_Hand2_second_motif	GLI3_Hand2_third_motif	FR	-4	GLI3	GLI3	0
GLI3_Hand2_second_motif.jpwm|GLI3_Hand2_third_motif.jpwm|FR|-2	5	100	3.15	1.90891	1.5873	0.969139	0.332476	5	GLI3_Hand2_second_motif	GLI3_Hand2_third_motif	FR	-2	GLI3	GLI3	0
GLI3_Hand2_second_motif.jpwm|GLI3_Hand2_third_motif.jpwm|FR|-3	12	100	3.2	1.72913	3.75	5.08926	3.59468e-07	12	GLI3_Hand2_second_motif	GLI3_Hand2_third_motif	FR	-3	GLI3	GLI3	0
GLI3_Hand2_second_motif.jpwm|GLI3_Hand2_third_motif.jpwm|FR|-1	3	100	2.57	1.84913	1.16732	0.232541	0.816118	3	GLI3_Hand2_second_motif	GLI3_Hand2_third_motif	FR	-1	GLI3	GLI3	0
GLI3_Hand2_second_motif.jpwm|GLI3_Hand2_third_motif.jpwm|FF|100	5	100	1.84	1.36122	2.71739	2.32144	0.0202631	5	GLI3_Hand2_second_motif	GLI3_Hand2_third_motif	FF	100	GLI3	GLI3	0
GLI3_Hand2_second_motif.jpwm|GLI3_Hand2_third_motif.jpwm|FR|18	1	100	2.49	1.39621	0.401606	-1.06718	0.285892	1	GLI3_Hand2_second_motif	GLI3_Hand2_third_motif	FR	18	GLI3	GLI3	0
GLI3_Hand2_second_motif.jpwm|GLI3_Hand2_third_motif.jpwm|FR|19	4	100	2.89	1.63852	1.38408	0.677441	0.498126	4	GLI3_Hand2_second_motif	GLI3_Hand2_third_motif	FR	19	GLI3	GLI3	0
GLI3_Hand2_second_motif.jpwm|GLI3_Hand2_third_motif.jpwm|FR|10	6	100	2.76	1.62754	2.17391	1.99073	0.0465102	6	GLI3_Hand2_second_motif	GLI3_Hand2_third_motif	FR	10	GLI3	GLI3	0
GLI3_Hand2_second_motif.jpwm|GLI3_Hand2_third_motif.jpwm|FR|11	3	100	2.66	1.59684	1.12782	0.21292	0.831389	3	GLI3_Hand2_second_motif	GLI3_Hand2_third_motif	FR	11	GLI3	GLI3	0
GLI3_Hand2_second_motif.jpwm|GLI3_Hand2_third_motif.jpwm|FR|12	4	100	2.55	1.5333	1.56863	0.945672	0.344316	4	GLI3_Hand2_second_motif	GLI3_Hand2_third_motif	FR	12	GLI3	GLI3	0
GLI3_Hand2_second_motif.jpwm|GLI3_Hand2_third_motif.jpwm|FR|13	2	100	2.99	1.54066	0.668896	-0.642581	0.520496	2	GLI3_Hand2_second_motif	GLI3_Hand2_third_motif	FR	13	GLI3	GLI3	0
GLI3_Hand2_second_motif.jpwm|GLI3_Hand2_third_motif.jpwm|FR|14	7	100	2.74	1.60567	2.55474	2.6531	0.00797574	7	GLI3_Hand2_second_motif	GLI3_Hand2_third_motif	FR	14	GLI3	GLI3	0
GLI3_Hand2_second_motif.jpwm|GLI3_Hand2_third_motif.jpwm|FR|15	3	100	2.48	1.69658	1.20968	0.306499	0.759225	3	GLI3_Hand2_second_motif	GLI3_Hand2_third_motif	FR	15	GLI3	GLI3	0
GLI3_Hand2_second_motif.jpwm|GLI3_Hand2_third_motif.jpwm|FR|16	1	100	2.46	1.87714	0.406504	-0.777781	0.436698	1	GLI3_Hand2_second_motif	GLI3_Hand2_third_motif	FR	16	GLI3	GLI3	0
GLI3_Hand2_second_motif.jpwm|GLI3_Hand2_third_motif.jpwm|FR|17	6	100	2.69	1.76209	2.23048	1.87845	0.060319	6	GLI3_Hand2_second_motif	GLI3_Hand2_third_motif	FR	17	GLI3	GLI3	0
GLI3_Hand2_second_motif.jpwm|GLI3_Hand2_third_motif.jpwm|RF|71	1	100	2.47	1.72008	0.404858	-0.85461	0.392767	1	GLI3_Hand2_second_motif	GLI3_Hand2_third_motif	RF	71	GLI3	GLI3	0
GLI3_Hand2_second_motif.jpwm|GLI3_Hand2_third_motif.jpwm|RF|43	4	100	2.55	1.28216	1.56863	1.1309	0.258096	4	GLI3_Hand2_second_motif	GLI3_Hand2_third_motif	RF	43	GLI3	GLI3	0
GLI3_Hand2_second_motif.jpwm|GLI3_Hand2_third_motif.jpwm|RF|42	3	100	2.44	1.55907	1.22951	0.359188	0.719455	3	GLI3_Hand2_second_motif	GLI3_Hand2_third_motif	RF	42	GLI3	GLI3	0
GLI3_Hand2_second_motif.jpwm|GLI3_Hand2_third_motif.jpwm|RF|41	4	100	2.72	1.51811	1.47059	0.843156	0.399141	4	GLI3_Hand2_second_motif	GLI3_Hand2_third_motif	RF	41	GLI3	GLI3	0
GLI3_Hand2_second_motif.jpwm|GLI3_Hand2_third_motif.jpwm|RF|40	4	100	2.66	1.60944	1.50376	0.832587	0.405078	4	GLI3_Hand2_second_motif	GLI3_Hand2_third_motif	RF	40	GLI3	GLI3	0
GLI3_Hand2_second_motif.jpwm|GLI3_Hand2_third_motif.jpwm|RF|46	5	100	2.33	1.66397	2.14592	1.6046	0.108582	5	GLI3_Hand2_second_motif	GLI3_Hand2_third_motif	RF	46	GLI3	GLI3	0
GLI3_Hand2_second_motif.jpwm|GLI3_Hand2_third_motif.jpwm|RF|45	2	100	2.52	1.78365	0.793651	-0.291537	0.770641	2	GLI3_Hand2_second_motif	GLI3_Hand2_third_motif	RF	45	GLI3	GLI3	0
GLI3_Hand2_second_motif.jpwm|GLI3_Hand2_third_motif.jpwm|RF|44	2	100	2.43	1.57156	0.823045	-0.273614	0.784382	2	GLI3_Hand2_second_motif	GLI3_Hand2_third_motif	RF	44	GLI3	GLI3	0
GLI3_Hand2_second_motif.jpwm|GLI3_Hand2_third_motif.jpwm|RF|49	1	100	2.42	1.45074	0.413223	-0.978811	0.327673	1	GLI3_Hand2_second_motif	GLI3_Hand2_third_motif	RF	49	GLI3	GLI3	0
GLI3_Hand2_second_motif.jpwm|GLI3_Hand2_third_motif.jpwm|RF|48	1	100	2.39	1.46952	0.41841	-0.945886	0.344207	1	GLI3_Hand2_second_motif	GLI3_Hand2_third_motif	RF	48	GLI3	GLI3	0
GLI3_Hand2_second_motif.jpwm|GLI3_Hand2_third_motif.jpwm|FR|73	4	100	2.22	1.67923	1.8018	1.06001	0.289139	4	GLI3_Hand2_second_motif	GLI3_Hand2_third_motif	FR	73	GLI3	GLI3	0
GLI3_Hand2_second_motif.jpwm|GLI3_Hand2_third_motif.jpwm|FF|20	3	100	2.24	1.37157	1.33929	0.554108	0.579505	3	GLI3_Hand2_second_motif	GLI3_Hand2_third_motif	FF	20	GLI3	GLI3	0
GLI3_Hand2_second_motif.jpwm|GLI3_Hand2_third_motif.jpwm|FF|23	5	100	2.16	1.3236	2.31481	2.14566	0.0319	5	GLI3_Hand2_second_motif	GLI3_Hand2_third_motif	FF	23	GLI3	GLI3	0
GLI3_Hand2_second_motif.jpwm|GLI3_Hand2_third_motif.jpwm|FF|22	5	100	2.08	1.36833	2.40385	2.13399	0.0328436	5	GLI3_Hand2_second_motif	GLI3_Hand2_third_motif	FF	22	GLI3	GLI3	0
GLI3_Hand2_second_motif.jpwm|GLI3_Hand2_third_motif.jpwm|FF|27	4	100	2.02	1.50407	1.9802	1.31643	0.18803	4	GLI3_Hand2_second_motif	GLI3_Hand2_third_motif	FF	27	GLI3	GLI3	0
GLI3_Hand2_second_motif.jpwm|GLI3_Hand2_third_motif.jpwm|FF|26	2	100	2.03	1.54694	0.985222	-0.0193931	0.984528	2	GLI3_Hand2_second_motif	GLI3_Hand2_third_motif	FF	26	GLI3	GLI3	0
GLI3_Hand2_second_motif.jpwm|GLI3_Hand2_third_motif.jpwm|FF|29	5	100	2.2	1.66969	2.27273	1.67695	0.0935515	5	GLI3_Hand2_second_motif	GLI3_Hand2_third_motif	FF	29	GLI3	GLI3	0
GLI3_Hand2_second_motif.jpwm|GLI3_Hand2_third_motif.jpwm|FR|8	1	100	2.58	1.77058	0.387597	-0.892364	0.372198	1	GLI3_Hand2_second_motif	GLI3_Hand2_third_motif	FR	8	GLI3	GLI3	0
GLI3_Hand2_second_motif.jpwm|GLI3_Hand2_third_motif.jpwm|FF|51	3	100	1.87	1.24442	1.60428	0.908052	0.363851	3	GLI3_Hand2_second_motif	GLI3_Hand2_third_motif	FF	51	GLI3	GLI3	0
GLI3_Hand2_second_motif.jpwm|GLI3_Hand2_third_motif.jpwm|RF|98	11	100	1.95	1.51341	5.64103	5.97988	2.23301e-09	11	GLI3_Hand2_second_motif	GLI3_Hand2_third_motif	RF	98	GLI3	GLI3	0
GLI3_Hand2_second_motif.jpwm|GLI3_Hand2_third_motif.jpwm|RF|99	6	100	2.12	1.62232	2.83019	2.39164	0.0167734	6	GLI3_Hand2_second_motif	GLI3_Hand2_third_motif	RF	99	GLI3	GLI3	0
GLI3_Hand2_second_motif.jpwm|GLI3_Hand2_third_motif.jpwm|FF|18	2	100	2.2	1.66363	0.909091	-0.120219	0.90431	2	GLI3_Hand2_second_motif	GLI3_Hand2_third_motif	FF	18	GLI3	GLI3	0
GLI3_Hand2_second_motif.jpwm|GLI3_Hand2_third_motif.jpwm|FF|19	4	100	2.4	1.56992	1.66667	1.01916	0.308127	4	GLI3_Hand2_second_motif	GLI3_Hand2_third_motif	FF	19	GLI3	GLI3	0
GLI3_Hand2_second_motif.jpwm|GLI3_Hand2_third_motif.jpwm|FF|14	3	100	2.16	1.52236	1.38889	0.551775	0.581102	3	GLI3_Hand2_second_motif	GLI3_Hand2_third_motif	FF	14	GLI3	GLI3	0
GLI3_Hand2_second_motif.jpwm|GLI3_Hand2_third_motif.jpwm|FF|15	1	100	1.85	1.53987	0.540541	-0.551993	0.580953	1	GLI3_Hand2_second_motif	GLI3_Hand2_third_motif	FF	15	GLI3	GLI3	0
GLI3_Hand2_second_motif.jpwm|GLI3_Hand2_third_motif.jpwm|FF|16	4	100	2.18	1.59785	1.83486	1.13903	0.254691	4	GLI3_Hand2_second_motif	GLI3_Hand2_third_motif	FF	16	GLI3	GLI3	0
GLI3_Hand2_second_motif.jpwm|GLI3_Hand2_third_motif.jpwm|RF|93	1	100	2.36	1.61758	0.423729	-0.840762	0.400481	1	GLI3_Hand2_second_motif	GLI3_Hand2_third_motif	RF	93	GLI3	GLI3	0
GLI3_Hand2_second_motif.jpwm|GLI3_Hand2_third_motif.jpwm|FF|10	2	100	2.02	1.34825	0.990099	-0.014834	0.988165	2	GLI3_Hand2_second_motif	GLI3_Hand2_third_motif	FF	10	GLI3	GLI3	0
GLI3_Hand2_second_motif.jpwm|GLI3_Hand2_third_motif.jpwm|RF|95	3	100	2.33	1.67606	1.28755	0.399746	0.689344	3	GLI3_Hand2_second_motif	GLI3_Hand2_third_motif	RF	95	GLI3	GLI3	0
GLI3_Hand2_second_motif.jpwm|GLI3_Hand2_third_motif.jpwm|FF|13	3	100	2.06	1.41293	1.45631	0.665285	0.505868	3	GLI3_Hand2_second_motif	GLI3_Hand2_third_motif	FF	13	GLI3	GLI3	0
GLI3_Hand2_second_motif.jpwm|GLI3_Hand2_third_motif.jpwm|FR|72	2	100	2.45	1.51341	0.816327	-0.297342	0.766205	2	GLI3_Hand2_second_motif	GLI3_Hand2_third_motif	FR	72	GLI3	GLI3	0
GLI3_Hand2_second_motif.jpwm|GLI3_Hand2_third_motif.jpwm|FF|94	2	100	1.95	1.29002	1.02564	0.0387592	0.969082	2	GLI3_Hand2_second_motif	GLI3_Hand2_third_motif	FF	94	GLI3	GLI3	0
GLI3_Hand2_second_motif.jpwm|GLI3_Hand2_third_motif.jpwm|FR|70	2	100	2.25	1.38808	0.888889	-0.180105	0.85707	2	GLI3_Hand2_second_motif	GLI3_Hand2_third_motif	FR	70	GLI3	GLI3	0
GLI3_Hand2_second_motif.jpwm|GLI3_Hand2_third_motif.jpwm|FR|71	3	100	2.76	1.65218	1.08696	0.145263	0.884503	3	GLI3_Hand2_second_motif	GLI3_Hand2_third_motif	FR	71	GLI3	GLI3	0
GLI3_Hand2_second_motif.jpwm|GLI3_Hand2_third_motif.jpwm|FR|76	6	100	2.13	1.66154	2.8169	2.32917	0.0198502	6	GLI3_Hand2_second_motif	GLI3_Hand2_third_motif	FR	76	GLI3	GLI3	0
GLI3_Hand2_second_motif.jpwm|GLI3_Hand2_third_motif.jpwm|FR|77	2	100	2.53	1.55995	0.790514	-0.339755	0.734041	2	GLI3_Hand2_second_motif	GLI3_Hand2_third_motif	FR	77	GLI3	GLI3	0
GLI3_Hand2_second_motif.jpwm|GLI3_Hand2_third_motif.jpwm|FR|74	3	100	2.43	1.64688	1.23457	0.346108	0.729261	3	GLI3_Hand2_second_motif	GLI3_Hand2_third_motif	FR	74	GLI3	GLI3	0
GLI3_Hand2_second_motif.jpwm|GLI3_Hand2_third_motif.jpwm|FF|95	2	100	1.58	1.22417	1.26582	0.34309	0.731531	2	GLI3_Hand2_second_motif	GLI3_Hand2_third_motif	FF	95	GLI3	GLI3	0
GLI3_Hand2_second_motif.jpwm|GLI3_Hand2_third_motif.jpwm|FR|78	3	100	2.44	1.45171	1.22951	0.385751	0.699681	3	GLI3_Hand2_second_motif	GLI3_Hand2_third_motif	FR	78	GLI3	GLI3	0
GLI3_Hand2_second_motif.jpwm|GLI3_Hand2_third_motif.jpwm|FF|96	1	100	1.7	1.29099	0.588235	-0.542218	0.587669	1	GLI3_Hand2_second_motif	GLI3_Hand2_third_motif	FF	96	GLI3	GLI3	0
GLI3_Hand2_second_motif.jpwm|GLI3_Hand2_third_motif.jpwm|FF|90	3	100	1.65	1.35866	1.81818	0.993625	0.320405	3	GLI3_Hand2_second_motif	GLI3_Hand2_third_motif	FF	90	GLI3	GLI3	0
GLI3_Hand2_second_motif.jpwm|GLI3_Hand2_third_motif.jpwm|FF|91	1	100	1.77	1.36962	0.564972	-0.5622	0.57398	1	GLI3_Hand2_second_motif	GLI3_Hand2_third_motif	FF	91	GLI3	GLI3	0
GLI3_Hand2_second_motif.jpwm|GLI3_Hand2_third_motif.jpwm|FF|92	2	100	1.68	1.42049	1.19048	0.225275	0.821765	2	GLI3_Hand2_second_motif	GLI3_Hand2_third_motif	FF	92	GLI3	GLI3	0
GLI3_Hand2_second_motif.jpwm|GLI3_Hand2_third_motif.jpwm|RF|17	3	100	2.71	1.61617	1.10701	0.179436	0.857595	3	GLI3_Hand2_second_motif	GLI3_Hand2_third_motif	RF	17	GLI3	GLI3	0
GLI3_Hand2_third_motif.jpwm|GLI3_Hand2_third_motif.jpwm|RF|75	2	100	0.33	0.603943	6.06061	2.76516	0.00568948	2	GLI3_Hand2_third_motif	GLI3_Hand2_third_motif	RF	75	GLI3	GLI3	0
GLI3_Hand2_third_motif.jpwm|GLI3_Hand2_third_motif.jpwm|RF|76	1	100	0.35	0.55732	2.85714	1.16629	0.243495	1	GLI3_Hand2_third_motif	GLI3_Hand2_third_motif	RF	76	GLI3	GLI3	0
GLI3_Hand2_third_motif.jpwm|GLI3_Hand2_third_motif.jpwm|RF|71	1	100	0.26	0.484507	3.84615	1.52732	0.12668	1	GLI3_Hand2_third_motif	GLI3_Hand2_third_motif	RF	71	GLI3	GLI3	0
GLI3_Hand2_third_motif.jpwm|GLI3_Hand2_third_motif.jpwm|RF|73	1	100	0.22	0.462317	4.54545	1.68715	0.091574	1	GLI3_Hand2_third_motif	GLI3_Hand2_third_motif	RF	73	GLI3	GLI3	0
GLI3_Hand2_third_motif.jpwm|GLI3_Hand2_third_motif.jpwm|FR|88	1	100	0.32	0.566399	3.125	1.20057	0.229919	1	GLI3_Hand2_third_motif	GLI3_Hand2_third_motif	FR	88	GLI3	GLI3	0
GLI3_Hand2_third_motif.jpwm|GLI3_Hand2_third_motif.jpwm|FF|34	9	100	1.08	1.00182	8.33333	7.90564	2.66562e-15	9	GLI3_Hand2_third_motif	GLI3_Hand2_third_motif	FF	34	GLI3	GLI3	0
GLI3_Hand2_third_motif.jpwm|GLI3_Hand2_third_motif.jpwm|FF|35	2	100	0.95	0.936089	2.10526	1.12169	0.261995	2	GLI3_Hand2_third_motif	GLI3_Hand2_third_motif	FF	35	GLI3	GLI3	0
GLI3_Hand2_third_motif.jpwm|GLI3_Hand2_third_motif.jpwm|FF|37	1	100	0.79	0.890976	1.26582	0.235697	0.813668	1	GLI3_Hand2_third_motif	GLI3_Hand2_third_motif	FF	37	GLI3	GLI3	0
GLI3_Hand2_third_motif.jpwm|GLI3_Hand2_third_motif.jpwm|FF|30	1	100	0.79	0.967085	1.26582	0.217148	0.828093	1	GLI3_Hand2_third_motif	GLI3_Hand2_third_motif	FF	30	GLI3	GLI3	0
GLI3_Hand2_third_motif.jpwm|GLI3_Hand2_third_motif.jpwm|FF|31	7	100	0.77	0.827006	9.09091	7.5332	4.95134e-14	7	GLI3_Hand2_third_motif	GLI3_Hand2_third_motif	FF	31	GLI3	GLI3	0
GLI3_Hand2_third_motif.jpwm|GLI3_Hand2_third_motif.jpwm|FF|32	1	100	1	1.00504	1	0	1	1	GLI3_Hand2_third_motif	GLI3_Hand2_third_motif	FF	32	GLI3	GLI3	0
GLI3_Hand2_third_motif.jpwm|GLI3_Hand2_third_motif.jpwm|FF|33	3	100	0.9	1.03962	3.33333	2.01997	0.0433865	3	GLI3_Hand2_third_motif	GLI3_Hand2_third_motif	FF	33	GLI3	GLI3	0
GLI3_Hand2_third_motif.jpwm|GLI3_Hand2_third_motif.jpwm|FF|38	2	100	0.76	0.842315	2.63158	1.47213	0.140985	2	GLI3_Hand2_third_motif	GLI3_Hand2_third_motif	FF	38	GLI3	GLI3	0
GLI3_Hand2_third_motif.jpwm|GLI3_Hand2_third_motif.jpwm|FF|39	1	100	0.76	0.985962	1.31579	0.243417	0.807682	1	GLI3_Hand2_third_motif	GLI3_Hand2_third_motif	FF	39	GLI3	GLI3	0
GLI3_Hand2_third_motif.jpwm|GLI3_Hand2_third_motif.jpwm|FF|41	2	100	0.87	0.960377	2.29885	1.17662	0.239347	2	GLI3_Hand2_third_motif	GLI3_Hand2_third_motif	FF	41	GLI3	GLI3	0
GLI3_Hand2_third_motif.jpwm|GLI3_Hand2_third_motif.jpwm|FF|43	3	100	0.77	0.983243	3.8961	2.268	0.023329	3	GLI3_Hand2_third_motif	GLI3_Hand2_third_motif	FF	43	GLI3	GLI3	0
GLI3_Hand2_third_motif.jpwm|GLI3_Hand2_third_motif.jpwm|FF|42	2	100	0.94	0.951554	2.12766	1.11397	0.265293	2	GLI3_Hand2_third_motif	GLI3_Hand2_third_motif	FF	42	GLI3	GLI3	0
GLI3_Hand2_third_motif.jpwm|GLI3_Hand2_third_motif.jpwm|FF|45	2	100	0.93	0.987344	2.15054	1.08372	0.278491	2	GLI3_Hand2_third_motif	GLI3_Hand2_third_motif	FF	45	GLI3	GLI3	0
GLI3_Hand2_third_motif.jpwm|GLI3_Hand2_third_motif.jpwm|FF|44	1	100	0.83	0.921735	1.20482	0.184435	0.853672	1	GLI3_Hand2_third_motif	GLI3_Hand2_third_motif	FF	44	GLI3	GLI3	0
GLI3_Hand2_third_motif.jpwm|GLI3_Hand2_third_motif.jpwm|FF|47	1	100	0.89	0.962898	1.1236	0.114239	0.909049	1	GLI3_Hand2_third_motif	GLI3_Hand2_third_motif	FF	47	GLI3	GLI3	0
GLI3_Hand2_third_motif.jpwm|GLI3_Hand2_third_motif.jpwm|FF|46	2	100	0.92	0.928559	2.17391	1.16309	0.244792	2	GLI3_Hand2_third_motif	GLI3_Hand2_third_motif	FF	46	GLI3	GLI3	0
GLI3_Hand2_third_motif.jpwm|GLI3_Hand2_third_motif.jpwm|FF|49	1	100	0.8	0.887625	1.25	0.22532	0.82173	1	GLI3_Hand2_third_motif	GLI3_Hand2_third_motif	FF	49	GLI3	GLI3	0
GLI3_Hand2_third_motif.jpwm|GLI3_Hand2_third_motif.jpwm|RF|12	1	100	0.39	0.617833	2.5641	0.987322	0.323485	1	GLI3_Hand2_third_motif	GLI3_Hand2_third_motif	RF	12	GLI3	GLI3	0
GLI3_Hand2_third_motif.jpwm|GLI3_Hand2_third_motif.jpwm|RF|18	1	100	0.31	0.544857	3.22581	1.26639	0.205374	1	GLI3_Hand2_third_motif	GLI3_Hand2_third_motif	RF	18	GLI3	GLI3	0
GLI3_Hand2_third_motif.jpwm|GLI3_Hand2_third_motif.jpwm|FF|53	1	100	0.68	0.789834	1.47059	0.405148	0.685369	1	GLI3_Hand2_third_motif	GLI3_Hand2_third_motif	FF	53	GLI3	GLI3	0
GLI3_Hand2_third_motif.jpwm|GLI3_Hand2_third_motif.jpwm|FF|51	2	100	0.63	0.82456	3.1746	1.66149	0.0966146	2	GLI3_Hand2_third_motif	GLI3_Hand2_third_motif	FF	51	GLI3	GLI3	0
GLI3_Hand2_third_motif.jpwm|GLI3_Hand2_third_motif.jpwm|FF|56	1	100	0.72	0.995749	1.38889	0.281195	0.77856	1	GLI3_Hand2_third_motif	GLI3_Hand2_third_motif	FF	56	GLI3	GLI3	0
GLI3_Hand2_third_motif.jpwm|GLI3_Hand2_third_motif.jpwm|FF|57	2	100	0.73	0.827006	2.73973	1.53566	0.124622	2	GLI3_Hand2_third_motif	GLI3_Hand2_third_motif	FF	57	GLI3	GLI3	0
GLI3_Hand2_third_motif.jpwm|GLI3_Hand2_third_motif.jpwm|FF|54	1	100	0.73	0.789515	1.36986	0.341982	0.732364	1	GLI3_Hand2_third_motif	GLI3_Hand2_third_motif	FF	54	GLI3	GLI3	0
GLI3_Hand2_third_motif.jpwm|GLI3_Hand2_third_motif.jpwm|FF|55	2	100	0.78	0.759851	2.5641	1.60558	0.108367	2	GLI3_Hand2_third_motif	GLI3_Hand2_third_motif	FF	55	GLI3	GLI3	0
GLI3_Hand2_third_motif.jpwm|GLI3_Hand2_third_motif.jpwm|FF|58	2	100	0.84	0.950492	2.38095	1.22042	0.222305	2	GLI3_Hand2_third_motif	GLI3_Hand2_third_motif	FF	58	GLI3	GLI3	0
GLI3_Hand2_third_motif.jpwm|GLI3_Hand2_third_motif.jpwm|FF|59	2	100	0.81	0.906709	2.46914	1.31244	0.189372	2	GLI3_Hand2_third_motif	GLI3_Hand2_third_motif	FF	59	GLI3	GLI3	0
GLI3_Hand2_third_motif.jpwm|GLI3_Hand2_third_motif.jpwm|FF|100	1	100	0.66	0.806789	1.51515	0.421423	0.673446	1	GLI3_Hand2_third_motif	GLI3_Hand2_third_motif	FF	100	GLI3	GLI3	0
GLI3_Hand2_third_motif.jpwm|GLI3_Hand2_third_motif.jpwm|RF|29	1	100	0.15	0.35887	6.66667	2.36854	0.0178583	1	GLI3_Hand2_third_motif	GLI3_Hand2_third_motif	RF	29	GLI3	GLI3	0
GLI3_Hand2_third_motif.jpwm|GLI3_Hand2_third_motif.jpwm|RF|28	1	100	0.28	0.514045	3.57143	1.40066	0.161317	1	GLI3_Hand2_third_motif	GLI3_Hand2_third_motif	RF	28	GLI3	GLI3	0
GLI3_Hand2_third_motif.jpwm|GLI3_Hand2_third_motif.jpwm|RF|25	1	100	0.32	0.566399	3.125	1.20057	0.229919	1	GLI3_Hand2_third_motif	GLI3_Hand2_third_motif	RF	25	GLI3	GLI3	0
GLI3_Hand2_third_motif.jpwm|GLI3_Hand2_third_motif.jpwm|RF|23	1	100	0.39	0.633971	2.5641	0.962189	0.335955	1	GLI3_Hand2_third_motif	GLI3_Hand2_third_motif	RF	23	GLI3	GLI3	0
GLI3_Hand2_third_motif.jpwm|GLI3_Hand2_third_motif.jpwm|RF|22	1	100	0.43	0.728288	2.32558	0.782657	0.433829	1	GLI3_Hand2_third_motif	GLI3_Hand2_third_motif	RF	22	GLI3	GLI3	0
GLI3_Hand2_third_motif.jpwm|GLI3_Hand2_third_motif.jpwm|RF|20	1	100	0.34	0.606697	2.94118	1.08786	0.276658	1	GLI3_Hand2_third_motif	GLI3_Hand2_third_motif	RF	20	GLI3	GLI3	0
GLI3_Hand2_third_motif.jpwm|GLI3_Hand2_third_motif.jpwm|FF|69	1	100	0.72	0.805035	1.38889	0.347811	0.727982	1	GLI3_Hand2_third_motif	GLI3_Hand2_third_motif	FF	69	GLI3	GLI3	0
GLI3_Hand2_third_motif.jpwm|GLI3_Hand2_third_motif.jpwm|FF|68	1	100	0.86	0.816744	1.16279	0.171412	0.8639	1	GLI3_Hand2_third_motif	GLI3_Hand2_third_motif	FF	68	GLI3	GLI3	0
GLI3_Hand2_third_motif.jpwm|GLI3_Hand2_third_motif.jpwm|FF|66	6	100	0.68	0.874787	8.82353	6.08148	1.19079e-09	6	GLI3_Hand2_third_motif	GLI3_Hand2_third_motif	FF	66	GLI3	GLI3	0
GLI3_Hand2_third_motif.jpwm|GLI3_Hand2_third_motif.jpwm|FF|65	1	100	0.7	0.797724	1.42857	0.37607	0.706865	1	GLI3_Hand2_third_motif	GLI3_Hand2_third_motif	FF	65	GLI3	GLI3	0
GLI3_Hand2_third_motif.jpwm|GLI3_Hand2_third_motif.jpwm|FF|63	1	100	0.76	0.911431	1.31579	0.263322	0.792302	1	GLI3_Hand2_third_motif	GLI3_Hand2_third_motif	FF	63	GLI3	GLI3	0
GLI3_Hand2_third_motif.jpwm|GLI3_Hand2_third_motif.jpwm|FF|62	3	100	0.73	0.763498	4.10959	2.97316	0.00294753	3	GLI3_Hand2_third_motif	GLI3_Hand2_third_motif	FF	62	GLI3	GLI3	0
GLI3_Hand2_third_motif.jpwm|GLI3_Hand2_third_motif.jpwm|FF|61	2	100	0.55	0.783349	3.63636	1.85103	0.0641658	2	GLI3_Hand2_third_motif	GLI3_Hand2_third_motif	FF	61	GLI3	GLI3	0
GLI3_Hand2_third_motif.jpwm|GLI3_Hand2_third_motif.jpwm|FF|60	4	100	0.75	0.770347	5.33333	4.21888	2.4552e-05	4	GLI3_Hand2_third_motif	GLI3_Hand2_third_motif	FF	60	GLI3	GLI3	0
GLI3_Hand2_third_motif.jpwm|GLI3_Hand2_third_motif.jpwm|RF|51	1	100	0.26	0.484507	3.84615	1.52732	0.12668	1	GLI3_Hand2_third_motif	GLI3_Hand2_third_motif	RF	51	GLI3	GLI3	0
GLI3_Hand2_third_motif.jpwm|GLI3_Hand2_third_motif.jpwm|RF|39	1	100	0.29	0.518253	3.44828	1.36999	0.170691	1	GLI3_Hand2_third_motif	GLI3_Hand2_third_motif	RF	39	GLI3	GLI3	0
GLI3_Hand2_third_motif.jpwm|GLI3_Hand2_third_motif.jpwm|RF|30	2	100	0.34	0.535978	5.88235	3.09714	0.00195397	2	GLI3_Hand2_third_motif	GLI3_Hand2_third_motif	RF	30	GLI3	GLI3	0
GLI3_Hand2_third_motif.jpwm|GLI3_Hand2_third_motif.jpwm|RF|31	1	100	0.31	0.580752	3.22581	1.18811	0.234788	1	GLI3_Hand2_third_motif	GLI3_Hand2_third_motif	RF	31	GLI3	GLI3	0
GLI3_Hand2_third_motif.jpwm|GLI3_Hand2_third_motif.jpwm|RF|33	1	100	0.31	0.662029	3.22581	1.04225	0.297296	1	GLI3_Hand2_third_motif	GLI3_Hand2_third_motif	RF	33	GLI3	GLI3	0
GLI3_Hand2_third_motif.jpwm|GLI3_Hand2_third_motif.jpwm|RF|35	1	100	0.31	0.544857	3.22581	1.26639	0.205374	1	GLI3_Hand2_third_motif	GLI3_Hand2_third_motif	RF	35	GLI3	GLI3	0
GLI3_Hand2_third_motif.jpwm|GLI3_Hand2_third_motif.jpwm|RF|9	2	100	0.38	0.632136	5.26316	2.56274	0.010385	2	GLI3_Hand2_third_motif	GLI3_Hand2_third_motif	RF	9	GLI3	GLI3	0
GLI3_Hand2_third_motif.jpwm|GLI3_Hand2_third_motif.jpwm|RF|2	1	100	0.28	0.494004	3.57143	1.45748	0.144985	1	GLI3_Hand2_third_motif	GLI3_Hand2_third_motif	RF	2	GLI3	GLI3	0
GLI3_Hand2_third_motif.jpwm|GLI3_Hand2_third_motif.jpwm|RF|3	2	100	0.33	0.58698	6.06061	2.84507	0.00444014	2	GLI3_Hand2_third_motif	GLI3_Hand2_third_motif	RF	3	GLI3	GLI3	0
GLI3_Hand2_third_motif.jpwm|GLI3_Hand2_third_motif.jpwm|RF|5	1	100	0.3	0.6742	3.33333	1.03827	0.299145	1	GLI3_Hand2_third_motif	GLI3_Hand2_third_motif	RF	5	GLI3	GLI3	0
GLI3_Hand2_third_motif.jpwm|GLI3_Hand2_third_motif.jpwm|RF|7	1	100	0.28	0.494004	3.57143	1.45748	0.144985	1	GLI3_Hand2_third_motif	GLI3_Hand2_third_motif	RF	7	GLI3	GLI3	0
GLI3_Hand2_third_motif.jpwm|GLI3_Hand2_third_motif.jpwm|RF|-4	1	100	0.46	0.716614	2.17391	0.753544	0.451123	1	GLI3_Hand2_third_motif	GLI3_Hand2_third_motif	RF	-4	GLI3	GLI3	0
GLI3_Hand2_third_motif.jpwm|GLI3_Hand2_third_motif.jpwm|RF|-3	1	100	2.65	1.5267	0.377358	-1.08076	0.279802	1	GLI3_Hand2_third_motif	GLI3_Hand2_third_motif	RF	-3	GLI3	GLI3	0
GLI3_Hand2_third_motif.jpwm|GLI3_Hand2_third_motif.jpwm|FF|70	1	100	0.64	0.822904	1.5625	0.437475	0.661767	1	GLI3_Hand2_third_motif	GLI3_Hand2_third_motif	FF	70	GLI3	GLI3	0
GLI3_Hand2_third_motif.jpwm|GLI3_Hand2_third_motif.jpwm|FF|72	1	100	0.89	0.95235	1.1236	0.115504	0.908046	1	GLI3_Hand2_third_motif	GLI3_Hand2_third_motif	FF	72	GLI3	GLI3	0
GLI3_Hand2_third_motif.jpwm|GLI3_Hand2_third_motif.jpwm|FF|73	1	100	0.62	0.749141	1.6129	0.507248	0.611981	1	GLI3_Hand2_third_motif	GLI3_Hand2_third_motif	FF	73	GLI3	GLI3	0
GLI3_Hand2_third_motif.jpwm|GLI3_Hand2_third_motif.jpwm|FF|75	1	100	0.75	0.946818	1.33333	0.264042	0.791747	1	GLI3_Hand2_third_motif	GLI3_Hand2_third_motif	FF	75	GLI3	GLI3	0
GLI3_Hand2_third_motif.jpwm|GLI3_Hand2_third_motif.jpwm|FR|89	1	100	0.28	0.58741	3.57143	1.22572	0.220304	1	GLI3_Hand2_third_motif	GLI3_Hand2_third_motif	FR	89	GLI3	GLI3	0
GLI3_Hand2_third_motif.jpwm|GLI3_Hand2_third_motif.jpwm|FR|83	1	100	0.24	0.494822	4.16667	1.53591	0.124561	1	GLI3_Hand2_third_motif	GLI3_Hand2_third_motif	FR	83	GLI3	GLI3	0
GLI3_Hand2_third_motif.jpwm|GLI3_Hand2_third_motif.jpwm|FR|82	1	100	0.23	0.547815	4.34783	1.40558	0.159848	1	GLI3_Hand2_third_motif	GLI3_Hand2_third_motif	FR	82	GLI3	GLI3	0
GLI3_Hand2_third_motif.jpwm|GLI3_Hand2_third_motif.jpwm|FR|85	1	100	0.23	0.509605	4.34783	1.51098	0.130795	1	GLI3_Hand2_third_motif	GLI3_Hand2_third_motif	FR	85	GLI3	GLI3	0
GLI3_Hand2_third_motif.jpwm|GLI3_Hand2_third_motif.jpwm|FR|84	1	100	0.26	0.484507	3.84615	1.52732	0.12668	1	GLI3_Hand2_third_motif	GLI3_Hand2_third_motif	FR	84	GLI3	GLI3	0
GLI3_Hand2_third_motif.jpwm|GLI3_Hand2_third_motif.jpwm|FR|86	1	100	0.22	0.462317	4.54545	1.68715	0.091574	1	GLI3_Hand2_third_motif	GLI3_Hand2_third_motif	FR	86	GLI3	GLI3	0
GLI3_Hand2_third_motif.jpwm|GLI3_Hand2_third_motif.jpwm|FF|87	1	100	0.75	0.79614	1.33333	0.314015	0.753509	1	GLI3_Hand2_third_motif	GLI3_Hand2_third_motif	FF	87	GLI3	GLI3	0
GLI3_Hand2_third_motif.jpwm|GLI3_Hand2_third_motif.jpwm|FF|86	2	100	0.71	0.795124	2.8169	1.62239	0.10472	2	GLI3_Hand2_third_motif	GLI3_Hand2_third_motif	FF	86	GLI3	GLI3	0
GLI3_Hand2_third_motif.jpwm|GLI3_Hand2_third_motif.jpwm|FF|81	2	100	0.69	0.800189	2.89855	1.63711	0.101607	2	GLI3_Hand2_third_motif	GLI3_Hand2_third_motif	FF	81	GLI3	GLI3	0
GLI3_Hand2_third_motif.jpwm|GLI3_Hand2_third_motif.jpwm|FF|83	2	100	0.78	0.823641	2.5641	1.48123	0.138546	2	GLI3_Hand2_third_motif	GLI3_Hand2_third_motif	FF	83	GLI3	GLI3	0
GLI3_Hand2_third_motif.jpwm|GLI3_Hand2_third_motif.jpwm|FF|82	1	100	0.64	0.822904	1.5625	0.437475	0.661767	1	GLI3_Hand2_third_motif	GLI3_Hand2_third_motif	FF	82	GLI3	GLI3	0
GLI3_Hand2_third_motif.jpwm|GLI3_Hand2_third_motif.jpwm|FF|88	2	100	0.89	0.941683	2.24719	1.17874	0.238502	2	GLI3_Hand2_third_motif	GLI3_Hand2_third_motif	FF	88	GLI3	GLI3	0
GLI3_Hand2_third_motif.jpwm|GLI3_Hand2_third_motif.jpwm|FR|98	1	100	0.18	0.457927	5.55556	1.79068	0.0733448	1	GLI3_Hand2_third_motif	GLI3_Hand2_third_motif	FR	98	GLI3	GLI3	0
GLI3_Hand2_third_motif.jpwm|GLI3_Hand2_third_motif.jpwm|FR|93	1	100	0.31	0.544857	3.22581	1.26639	0.205374	1	GLI3_Hand2_third_motif	GLI3_Hand2_third_motif	FR	93	GLI3	GLI3	0
GLI3_Hand2_third_motif.jpwm|GLI3_Hand2_third_motif.jpwm|FR|90	1	100	0.27	0.489382	3.7037	1.49168	0.135784	1	GLI3_Hand2_third_motif	GLI3_Hand2_third_motif	FR	90	GLI3	GLI3	0
GLI3_Hand2_third_motif.jpwm|GLI3_Hand2_third_motif.jpwm|FR|96	1	100	0.24	0.473969	4.16667	1.60348	0.108829	1	GLI3_Hand2_third_motif	GLI3_Hand2_third_motif	FR	96	GLI3	GLI3	0
GLI3_Hand2_third_motif.jpwm|GLI3_Hand2_third_motif.jpwm|FR|94	1	100	0.26	0.463191	3.84615	1.59761	0.110129	1	GLI3_Hand2_third_motif	GLI3_Hand2_third_motif	FR	94	GLI3	GLI3	0
GLI3_Hand2_third_motif.jpwm|GLI3_Hand2_third_motif.jpwm|FF|96	1	100	0.76	0.922447	1.31579	0.260177	0.794727	1	GLI3_Hand2_third_motif	GLI3_Hand2_third_motif	FF	96	GLI3	GLI3	0
GLI3_Hand2_third_motif.jpwm|GLI3_Hand2_third_motif.jpwm|FF|94	2	100	0.72	0.888535	2.77778	1.44057	0.149705	2	GLI3_Hand2_third_motif	GLI3_Hand2_third_motif	FF	94	GLI3	GLI3	0
GLI3_Hand2_third_motif.jpwm|GLI3_Hand2_third_motif.jpwm|FF|95	1	100	0.68	0.708961	1.47059	0.451364	0.651727	1	GLI3_Hand2_third_motif	GLI3_Hand2_third_motif	FF	95	GLI3	GLI3	0
GLI3_Hand2_third_motif.jpwm|GLI3_Hand2_third_motif.jpwm|FF|93	1	100	0.73	0.897302	1.36986	0.300902	0.763489	1	GLI3_Hand2_third_motif	GLI3_Hand2_third_motif	FF	93	GLI3	GLI3	0
GLI3_Hand2_third_motif.jpwm|GLI3_Hand2_third_motif.jpwm|FF|91	2	100	0.78	0.732782	2.5641	1.66489	0.0959352	2	GLI3_Hand2_third_motif	GLI3_Hand2_third_motif	FF	91	GLI3	GLI3	0
GLI3_Hand2_third_motif.jpwm|GLI3_Hand2_third_motif.jpwm|FF|98	3	100	0.73	1.00358	4.10959	2.2619	0.0237034	3	GLI3_Hand2_third_motif	GLI3_Hand2_third_motif	FF	98	GLI3	GLI3	0
GLI3_Hand2_third_motif.jpwm|GLI3_Hand2_third_motif.jpwm|FF|99	1	100	0.68	0.839432	1.47059	0.38121	0.703047	1	GLI3_Hand2_third_motif	GLI3_Hand2_third_motif	FF	99	GLI3	GLI3	0
GLI3_Hand2_third_motif.jpwm|GLI3_Hand2_third_motif.jpwm|FR|48	1	100	0.31	0.580752	3.22581	1.18811	0.234788	1	GLI3_Hand2_third_motif	GLI3_Hand2_third_motif	FR	48	GLI3	GLI3	0
GLI3_Hand2_third_motif.jpwm|GLI3_Hand2_third_motif.jpwm|FR|45	1	100	0.27	0.529055	3.7037	1.37982	0.167642	1	GLI3_Hand2_third_motif	GLI3_Hand2_third_motif	FR	45	GLI3	GLI3	0
GLI3_Hand2_third_motif.jpwm|GLI3_Hand2_third_motif.jpwm|FR|46	1	100	0.34	0.589813	2.94118	1.119	0.26314	1	GLI3_Hand2_third_motif	GLI3_Hand2_third_motif	FR	46	GLI3	GLI3	0
GLI3_Hand2_third_motif.jpwm|GLI3_Hand2_third_motif.jpwm|FR|41	1	100	0.43	0.7	2.32558	0.814286	0.415481	1	GLI3_Hand2_third_motif	GLI3_Hand2_third_motif	FR	41	GLI3	GLI3	0
GLI3_Hand2_third_motif.jpwm|GLI3_Hand2_third_motif.jpwm|FR|40	1	100	0.36	0.594928	2.77778	1.07576	0.282034	1	GLI3_Hand2_third_motif	GLI3_Hand2_third_motif	FR	40	GLI3	GLI3	0
GLI3_Hand2_third_motif.jpwm|GLI3_Hand2_third_motif.jpwm|FR|42	1	100	0.29	0.477684	3.44828	1.48634	0.13719	1	GLI3_Hand2_third_motif	GLI3_Hand2_third_motif	FR	42	GLI3	GLI3	0
GLI3_Hand2_third_motif.jpwm|GLI3_Hand2_third_motif.jpwm|FF|-3	7	100	1.69	1.29252	4.14201	4.10826	3.98658e-05	7	GLI3_Hand2_third_motif	GLI3_Hand2_third_motif	FF	-3	GLI3	GLI3	0
GLI3_Hand2_third_motif.jpwm|GLI3_Hand2_third_motif.jpwm|FF|-1	2	100	1.09	1.06453	1.83486	0.854834	0.392643	2	GLI3_Hand2_third_motif	GLI3_Hand2_third_motif	FF	-1	GLI3	GLI3	0
GLI3_Hand2_third_motif.jpwm|GLI3_Hand2_third_motif.jpwm|FF|-5	2	100	0.45	0.641573	4.44444	2.41594	0.0156948	2	GLI3_Hand2_third_motif	GLI3_Hand2_third_motif	FF	-5	GLI3	GLI3	0
GLI3_Hand2_third_motif.jpwm|GLI3_Hand2_third_motif.jpwm|FR|68	1	100	0.28	0.533333	3.57143	1.35	0.177016	1	GLI3_Hand2_third_motif	GLI3_Hand2_third_motif	FR	68	GLI3	GLI3	0
GLI3_Hand2_third_motif.jpwm|GLI3_Hand2_third_motif.jpwm|FR|63	1	100	0.33	0.55149	3.0303	1.21489	0.224408	1	GLI3_Hand2_third_motif	GLI3_Hand2_third_motif	FR	63	GLI3	GLI3	0
GLI3_Hand2_third_motif.jpwm|GLI3_Hand2_third_motif.jpwm|FR|61	1	100	0.28	0.569955	3.57143	1.26326	0.206496	1	GLI3_Hand2_third_motif	GLI3_Hand2_third_motif	FR	61	GLI3	GLI3	0
GLI3_Hand2_third_motif.jpwm|GLI3_Hand2_third_motif.jpwm|FR|60	2	100	0.31	0.56309	6.45161	3.00129	0.00268834	2	GLI3_Hand2_third_motif	GLI3_Hand2_third_motif	FR	60	GLI3	GLI3	0
GLI3_Hand2_third_motif.jpwm|GLI3_Hand2_third_motif.jpwm|FR|67	1	100	0.23	0.468287	4.34783	1.64429	0.100116	1	GLI3_Hand2_third_motif	GLI3_Hand2_third_motif	FR	67	GLI3	GLI3	0
GLI3_Hand2_third_motif.jpwm|GLI3_Hand2_third_motif.jpwm|FR|65	1	100	0.32	0.548276	3.125	1.24025	0.214882	1	GLI3_Hand2_third_motif	GLI3_Hand2_third_motif	FR	65	GLI3	GLI3	0
GLI3_Hand2_third_motif.jpwm|GLI3_Hand2_third_motif.jpwm|FR|64	1	100	0.32	0.548276	3.125	1.24025	0.214882	1	GLI3_Hand2_third_motif	GLI3_Hand2_third_motif	FR	64	GLI3	GLI3	0
GLI3_Hand2_third_motif.jpwm|GLI3_Hand2_third_motif.jpwm|FF|8	6	100	1.04	0.973591	5.76923	5.09454	3.49583e-07	6	GLI3_Hand2_third_motif	GLI3_Hand2_third_motif	FF	8	GLI3	GLI3	0
GLI3_Hand2_third_motif.jpwm|GLI3_Hand2_third_motif.jpwm|FF|4	1	100	0.84	0.939804	1.19048	0.170248	0.864815	1	GLI3_Hand2_third_motif	GLI3_Hand2_third_motif	FF	4	GLI3	GLI3	0
GLI3_Hand2_third_motif.jpwm|GLI3_Hand2_third_motif.jpwm|FF|5	6	100	0.79	0.913369	7.59494	5.70416	1.16919e-08	5	GLI3_Hand2_third_motif	GLI3_Hand2_third_motif	FF	5	GLI3	GLI3	0
GLI3_Hand2_third_motif.jpwm|GLI3_Hand2_third_motif.jpwm|FF|6	2	100	0.89	0.962898	2.24719	1.15277	0.249005	2	GLI3_Hand2_third_motif	GLI3_Hand2_third_motif	FF	6	GLI3	GLI3	0
GLI3_Hand2_third_motif.jpwm|GLI3_Hand2_third_motif.jpwm|FF|7	2	100	0.84	0.895781	2.38095	1.29496	0.195334	2	GLI3_Hand2_third_motif	GLI3_Hand2_third_motif	FF	7	GLI3	GLI3	0
GLI3_Hand2_third_motif.jpwm|GLI3_Hand2_third_motif.jpwm|FF|0	2	100	0.85	0.891883	2.35294	1.28941	0.197256	2	GLI3_Hand2_third_motif	GLI3_Hand2_third_motif	FF	0	GLI3	GLI3	0
GLI3_Hand2_third_motif.jpwm|GLI3_Hand2_third_motif.jpwm|FF|1	2	100	1.1	1.1415	1.81818	0.788434	0.430443	2	GLI3_Hand2_third_motif	GLI3_Hand2_third_motif	FF	1	GLI3	GLI3	0
GLI3_Hand2_third_motif.jpwm|GLI3_Hand2_third_motif.jpwm|FF|3	4	100	0.95	0.845368	4.21053	3.6079	0.000308688	4	GLI3_Hand2_third_motif	GLI3_Hand2_third_motif	FF	3	GLI3	GLI3	0
GLI3_Hand2_third_motif.jpwm|GLI3_Hand2_third_motif.jpwm|RF|81	1	100	0.23	0.489382	4.34783	1.57341	0.115623	1	GLI3_Hand2_third_motif	GLI3_Hand2_third_motif	RF	81	GLI3	GLI3	0
GLI3_Hand2_third_motif.jpwm|GLI3_Hand2_third_motif.jpwm|RF|85	2	100	0.33	0.513554	6.06061	3.25185	0.00114656	2	GLI3_Hand2_third_motif	GLI3_Hand2_third_motif	RF	85	GLI3	GLI3	0
GLI3_Hand2_third_motif.jpwm|GLI3_Hand2_third_motif.jpwm|RF|84	1	100	0.29	0.498381	3.44828	1.42461	0.154269	1	GLI3_Hand2_third_motif	GLI3_Hand2_third_motif	RF	84	GLI3	GLI3	0
GLI3_Hand2_third_motif.jpwm|GLI3_Hand2_third_motif.jpwm|FR|8	1	100	0.28	0.533333	3.57143	1.35	0.177016	1	GLI3_Hand2_third_motif	GLI3_Hand2_third_motif	FR	8	GLI3	GLI3	0
GLI3_Hand2_third_motif.jpwm|GLI3_Hand2_third_motif.jpwm|FR|0	1	100	0.33	0.569512	3.0303	1.17645	0.239416	1	GLI3_Hand2_third_motif	GLI3_Hand2_third_motif	FR	0	GLI3	GLI3	0
GLI3_Hand2_third_motif.jpwm|GLI3_Hand2_third_motif.jpwm|FR|1	1	100	0.3	0.522233	3.33333	1.3404	0.180116	1	GLI3_Hand2_third_motif	GLI3_Hand2_third_motif	FR	1	GLI3	GLI3	0
GLI3_Hand2_third_motif.jpwm|GLI3_Hand2_third_motif.jpwm|FR|3	1	100	0.37	0.544115	2.7027	1.15784	0.246927	1	GLI3_Hand2_third_motif	GLI3_Hand2_third_motif	FR	3	GLI3	GLI3	0
GLI3_Hand2_third_motif.jpwm|GLI3_Hand2_third_motif.jpwm|FR|4	2	100	0.31	0.544857	6.45161	3.10173	0.00192391	2	GLI3_Hand2_third_motif	GLI3_Hand2_third_motif	FR	4	GLI3	GLI3	0
GLI3_Hand2_third_motif.jpwm|GLI3_Hand2_third_motif.jpwm|FR|7	1	100	0.33	0.513554	3.0303	1.30463	0.192017	1	GLI3_Hand2_third_motif	GLI3_Hand2_third_motif	FR	7	GLI3	GLI3	0
GLI3_Hand2_third_motif.jpwm|GLI3_Hand2_third_motif.jpwm|FR|74	1	100	0.33	0.58698	3.0303	1.14144	0.253689	1	GLI3_Hand2_third_motif	GLI3_Hand2_third_motif	FR	74	GLI3	GLI3	0
GLI3_Hand2_third_motif.jpwm|GLI3_Hand2_third_motif.jpwm|FR|76	2	100	0.29	0.53739	6.89655	3.18205	0.00146238	2	GLI3_Hand2_third_motif	GLI3_Hand2_third_motif	FR	76	GLI3	GLI3	0
GLI3_Hand2_third_motif.jpwm|GLI3_Hand2_third_motif.jpwm|FR|77	1	100	0.35	0.609272	2.85714	1.06685	0.286041	1	GLI3_Hand2_third_motif	GLI3_Hand2_third_motif	FR	77	GLI3	GLI3	0
GLI3_Hand2_third_motif.jpwm|GLI3_Hand2_third_motif.jpwm|FR|71	1	100	0.21	0.456048	4.7619	1.73227	0.0832248	1	GLI3_Hand2_third_motif	GLI3_Hand2_third_motif	FR	71	GLI3	GLI3	0
GLI3_Hand2_third_motif.jpwm|GLI3_Hand2_third_motif.jpwm|FR|73	1	100	0.25	0.457817	4	1.63821	0.101378	1	GLI3_Hand2_third_motif	GLI3_Hand2_third_motif	FR	73	GLI3	GLI3	0
GLI3_Hand2_third_motif.jpwm|GLI3_Hand2_third_motif.jpwm|FR|78	1	100	0.23	0.529055	4.34783	1.45543	0.145551	1	GLI3_Hand2_third_motif	GLI3_Hand2_third_motif	FR	78	GLI3	GLI3	0
GLI3_Hand2_third_motif.jpwm|GLI3_Hand2_third_motif.jpwm|RF|91	1	100	0.32	0.566399	3.125	1.20057	0.229919	1	GLI3_Hand2_third_motif	GLI3_Hand2_third_motif	RF	91	GLI3	GLI3	0
GLI3_Hand2_third_motif.jpwm|GLI3_Hand2_third_motif.jpwm|RF|96	1	100	0.15	0.35887	6.66667	2.36854	0.0178583	1	GLI3_Hand2_third_motif	GLI3_Hand2_third_motif	RF	96	GLI3	GLI3	0
GLI3_Hand2_third_motif.jpwm|GLI3_Hand2_third_motif.jpwm|RF|48	1	100	0.28	0.551948	3.57143	1.30447	0.192073	1	GLI3_Hand2_third_motif	GLI3_Hand2_third_motif	RF	48	GLI3	GLI3	0
GLI3_Hand2_third_motif.jpwm|GLI3_Hand2_third_motif.jpwm|RF|45	1	100	0.41	0.587668	2.43902	1.00397	0.315394	1	GLI3_Hand2_third_motif	GLI3_Hand2_third_motif	RF	45	GLI3	GLI3	0
GLI3_Hand2_third_motif.jpwm|GLI3_Hand2_third_motif.jpwm|RF|40	1	100	0.24	0.452155	4.16667	1.68084	0.0927943	1	GLI3_Hand2_third_motif	GLI3_Hand2_third_motif	RF	40	GLI3	GLI3	0
GLI3_Hand2_third_motif.jpwm|GLI3_Hand2_third_motif.jpwm|RF|42	1	100	0.39	0.601261	2.5641	1.01453	0.310328	1	GLI3_Hand2_third_motif	GLI3_Hand2_third_motif	RF	42	GLI3	GLI3	0
GLI3_Hand2_third_motif.jpwm|GLI3_Hand2_third_motif.jpwm|FR|10	1	100	0.33	0.58698	3.0303	1.14144	0.253689	1	GLI3_Hand2_third_motif	GLI3_Hand2_third_motif	FR	10	GLI3	GLI3	0
GLI3_Hand2_third_motif.jpwm|GLI3_Hand2_third_motif.jpwm|FR|17	1	100	0.4	0.586033	2.5	1.02383	0.305914	1	GLI3_Hand2_third_motif	GLI3_Hand2_third_motif	FR	17	GLI3	GLI3	0
GLI3_Hand2_third_motif.jpwm|GLI3_Hand2_third_motif.jpwm|FR|14	1	100	0.29	0.456048	3.44828	1.55685	0.119505	1	GLI3_Hand2_third_motif	GLI3_Hand2_third_motif	FR	14	GLI3	GLI3	0
GLI3_Hand2_third_motif.jpwm|GLI3_Hand2_third_motif.jpwm|FR|23	1	100	0.26	0.596623	3.84615	1.24031	0.21486	1	GLI3_Hand2_third_motif	GLI3_Hand2_third_motif	FR	23	GLI3	GLI3	0
GLI3_Hand2_third_motif.jpwm|GLI3_Hand2_third_motif.jpwm|RF|58	1	100	0.33	0.53286	3.0303	1.25737	0.208621	1	GLI3_Hand2_third_motif	GLI3_Hand2_third_motif	RF	58	GLI3	GLI3	0
GLI3_Hand2_third_motif.jpwm|GLI3_Hand2_third_motif.jpwm|RF|55	1	100	0.42	0.622475	2.38095	0.931765	0.351458	1	GLI3_Hand2_third_motif	GLI3_Hand2_third_motif	RF	55	GLI3	GLI3	0
GLI3_Hand2_third_motif.jpwm|GLI3_Hand2_third_motif.jpwm|RF|53	1	100	0.28	0.514045	3.57143	1.40066	0.161317	1	GLI3_Hand2_third_motif	GLI3_Hand2_third_motif	RF	53	GLI3	GLI3	0
GLI3_Hand2_third_motif.jpwm|GLI3_Hand2_third_motif.jpwm|FF|18	2	100	0.88	1.01782	2.27273	1.10039	0.271162	2	GLI3_Hand2_third_motif	GLI3_Hand2_third_motif	FF	18	GLI3	GLI3	0
GLI3_Hand2_third_motif.jpwm|GLI3_Hand2_third_motif.jpwm|FF|16	3	100	0.94	0.982884	3.19149	2.09587	0.0360934	3	GLI3_Hand2_third_motif	GLI3_Hand2_third_motif	FF	16	GLI3	GLI3	0
GLI3_Hand2_third_motif.jpwm|GLI3_Hand2_third_motif.jpwm|FF|17	2	100	0.92	0.939374	2.17391	1.1497	0.250267	2	GLI3_Hand2_third_motif	GLI3_Hand2_third_motif	FF	17	GLI3	GLI3	0
GLI3_Hand2_third_motif.jpwm|GLI3_Hand2_third_motif.jpwm|FF|14	3	100	0.86	0.910322	3.48837	2.35082	0.0187323	3	GLI3_Hand2_third_motif	GLI3_Hand2_third_motif	FF	14	GLI3	GLI3	0
GLI3_Hand2_third_motif.jpwm|GLI3_Hand2_third_motif.jpwm|FF|15	3	100	0.9	0.84686	3.33333	2.47975	0.0131475	3	GLI3_Hand2_third_motif	GLI3_Hand2_third_motif	FF	15	GLI3	GLI3	0
GLI3_Hand2_third_motif.jpwm|GLI3_Hand2_third_motif.jpwm|FF|12	3	100	1.03	0.999545	2.91262	1.9709	0.0487358	3	GLI3_Hand2_third_motif	GLI3_Hand2_third_motif	FF	12	GLI3	GLI3	0
GLI3_Hand2_third_motif.jpwm|GLI3_Hand2_third_motif.jpwm|FF|13	1	100	0.74	0.773553	1.35135	0.336112	0.736787	1	GLI3_Hand2_third_motif	GLI3_Hand2_third_motif	FF	13	GLI3	GLI3	0
GLI3_Hand2_third_motif.jpwm|GLI3_Hand2_third_motif.jpwm|FF|10	2	100	0.9	0.937437	2.22222	1.17341	0.24063	2	GLI3_Hand2_third_motif	GLI3_Hand2_third_motif	FF	10	GLI3	GLI3	0
GLI3_Hand2_third_motif.jpwm|GLI3_Hand2_third_motif.jpwm|FF|11	3	100	0.77	0.827006	3.8961	2.69647	0.00700781	3	GLI3_Hand2_third_motif	GLI3_Hand2_third_motif	FF	11	GLI3	GLI3	0
GLI3_Hand2_third_motif.jpwm|GLI3_Hand2_third_motif.jpwm|FR|29	1	100	0.23	0.489382	4.34783	1.57341	0.115623	1	GLI3_Hand2_third_motif	GLI3_Hand2_third_motif	FR	29	GLI3	GLI3	0
GLI3_Hand2_third_motif.jpwm|GLI3_Hand2_third_motif.jpwm|FR|26	2	100	0.26	0.504925	7.69231	3.44605	0.000568835	2	GLI3_Hand2_third_motif	GLI3_Hand2_third_motif	FR	26	GLI3	GLI3	0
GLI3_Hand2_third_motif.jpwm|GLI3_Hand2_third_motif.jpwm|FR|24	2	100	0.31	0.544857	6.45161	3.10173	0.00192391	2	GLI3_Hand2_third_motif	GLI3_Hand2_third_motif	FR	24	GLI3	GLI3	0
GLI3_Hand2_third_motif.jpwm|GLI3_Hand2_third_motif.jpwm|FR|32	1	100	0.28	0.551948	3.57143	1.30447	0.192073	1	GLI3_Hand2_third_motif	GLI3_Hand2_third_motif	FR	32	GLI3	GLI3	0
GLI3_Hand2_third_motif.jpwm|GLI3_Hand2_third_motif.jpwm|FR|33	2	100	0.31	0.506423	6.45161	3.33713	0.000846488	2	GLI3_Hand2_third_motif	GLI3_Hand2_third_motif	FR	33	GLI3	GLI3	0
GLI3_Hand2_third_motif.jpwm|GLI3_Hand2_third_motif.jpwm|RF|82	1	100	0.31	0.56309	3.22581	1.22538	0.220432	1	GLI3_Hand2_third_motif	GLI3_Hand2_third_motif	RF	82	GLI3	GLI3	0
GLI3_Hand2_third_motif.jpwm|GLI3_Hand2_third_motif.jpwm|RF|68	2	100	0.23	0.446196	8.69565	3.96687	7.28238e-05	2	GLI3_Hand2_third_motif	GLI3_Hand2_third_motif	RF	68	GLI3	GLI3	0
GLI3_Hand2_third_motif.jpwm|GLI3_Hand2_third_motif.jpwm|FF|29	1	100	0.87	0.939106	1.14943	0.13843	0.889901	1	GLI3_Hand2_third_motif	GLI3_Hand2_third_motif	FF	29	GLI3	GLI3	0
GLI3_Hand2_third_motif.jpwm|GLI3_Hand2_third_motif.jpwm|FF|23	1	100	0.92	1.09802	1.08696	0.0728582	0.941919	1	GLI3_Hand2_third_motif	GLI3_Hand2_third_motif	FF	23	GLI3	GLI3	0
GLI3_Hand2_third_motif.jpwm|GLI3_Hand2_third_motif.jpwm|FF|22	6	100	0.84	0.928994	7.14286	5.55439	2.78577e-08	6	GLI3_Hand2_third_motif	GLI3_Hand2_third_motif	FF	22	GLI3	GLI3	0
GLI3_Hand2_third_motif.jpwm|GLI3_Hand2_third_motif.jpwm|FF|21	2	100	0.89	0.930895	2.24719	1.1924	0.233104	2	GLI3_Hand2_third_motif	GLI3_Hand2_third_motif	FF	21	GLI3	GLI3	0
GLI3_Hand2_third_motif.jpwm|GLI3_Hand2_third_motif.jpwm|FF|20	3	100	0.91	0.922174	3.2967	2.26638	0.0234278	3	GLI3_Hand2_third_motif	GLI3_Hand2_third_motif	FF	20	GLI3	GLI3	0
GLI3_Hand2_third_motif.jpwm|GLI3_Hand2_third_motif.jpwm|FF|27	1	100	1.04	0.994124	0.961538	-0.0402364	0.967905	1	GLI3_Hand2_third_motif	GLI3_Hand2_third_motif	FF	27	GLI3	GLI3	0
GLI3_Hand2_third_motif.jpwm|GLI3_Hand2_third_motif.jpwm|FF|26	2	100	1.04	0.941952	1.92308	1.01916	0.308127	2	GLI3_Hand2_third_motif	GLI3_Hand2_third_motif	FF	26	GLI3	GLI3	0
GLI3_Hand2_third_motif.jpwm|GLI3_Hand2_third_motif.jpwm|FF|25	2	100	0.92	0.939374	2.17391	1.1497	0.250267	2	GLI3_Hand2_third_motif	GLI3_Hand2_third_motif	FF	25	GLI3	GLI3	0
GLI3_Hand2_third_motif.jpwm|GLI3_Hand2_third_motif.jpwm|FF|24	4	100	0.98	0.909878	4.08163	3.31912	0.000903001	4	GLI3_Hand2_third_motif	GLI3_Hand2_third_motif	FF	24	GLI3	GLI3	0
GLI3_Hand2_third_motif.jpwm|GLI3_Hand2_third_motif.jpwm|FR|38	2	100	0.26	0.504925	7.69231	3.44605	0.000568835	2	GLI3_Hand2_third_motif	GLI3_Hand2_third_motif	FR	38	GLI3	GLI3	0
GLI3_Hand2_third_motif.jpwm|GLI3_Hand2_third_motif.jpwm|FR|30	2	100	0.27	0.468287	7.40741	3.69431	0.000220481	2	GLI3_Hand2_third_motif	GLI3_Hand2_third_motif	FR	30	GLI3	GLI3	0
GLI3_Hand2_third_motif.jpwm|GLI3_Hand2_third_motif.jpwm|FR|34	1	100	0.26	0.543464	3.84615	1.36163	0.173313	1	GLI3_Hand2_third_motif	GLI3_Hand2_third_motif	FR	34	GLI3	GLI3	0
GLI3_Hand2_third_motif.jpwm|GLI3_Hand2_third_motif.jpwm|FR|35	1	100	0.34	0.554504	2.94118	1.19025	0.233947	1	GLI3_Hand2_third_motif	GLI3_Hand2_third_motif	FR	35	GLI3	GLI3	0
GLI3_Hand2_third_motif.jpwm|GLI3_Hand2_third_motif.jpwm|FR|36	1	100	0.25	0.5	4	1.5	0.133614	1	GLI3_Hand2_third_motif	GLI3_Hand2_third_motif	FR	36	GLI3	GLI3	0
GLI3_only_first_motif.jpwm|GLI3_Hand2_third_motif.jpwm|FF|-5	2	100	1.27	1.0811	1.5748	0.675235	0.499526	2	GLI3_only_first_motif	GLI3_Hand2_third_motif	FF	-5	GLI3	GLI3	0
GLI3_only_first_motif.jpwm|GLI3_Hand2_third_motif.jpwm|FF|16	1	100	0.21	0.433333	4.7619	1.82308	0.0682917	1	GLI3_only_first_motif	GLI3_Hand2_third_motif	FF	16	GLI3	GLI3	0
GLI3_only_first_motif.jpwm|GLI3_Hand2_third_motif.jpwm|FF|15	1	100	0.16	0.419716	6.25	2.00135	0.0453544	1	GLI3_only_first_motif	GLI3_Hand2_third_motif	FF	15	GLI3	GLI3	0
GLI3_only_first_motif.jpwm|GLI3_Hand2_third_motif.jpwm|FF|13	1	100	0.14	0.471833	7.14286	1.82268	0.068352	1	GLI3_only_first_motif	GLI3_Hand2_third_motif	FF	13	GLI3	GLI3	0
GLI3_only_first_motif.jpwm|GLI3_Hand2_third_motif.jpwm|FF|10	1	100	0.18	0.386123	5.55556	2.12368	0.0336972	1	GLI3_only_first_motif	GLI3_Hand2_third_motif	FF	10	GLI3	GLI3	0
GLI3_only_first_motif.jpwm|GLI3_Hand2_third_motif.jpwm|FF|28	1	100	0.21	0.456048	4.7619	1.73227	0.0832248	1	GLI3_only_first_motif	GLI3_Hand2_third_motif	FF	28	GLI3	GLI3	0
GLI3_only_first_motif.jpwm|GLI3_Hand2_third_motif.jpwm|FF|29	2	100	0.25	0.479372	8	3.65061	0.000261622	1	GLI3_only_first_motif	GLI3_Hand2_third_motif	FF	29	GLI3	GLI3	0
GLI3_only_first_motif.jpwm|GLI3_Hand2_third_motif.jpwm|FF|22	2	100	0.18	0.411452	11.1111	4.42336	9.7179e-06	2	GLI3_only_first_motif	GLI3_Hand2_third_motif	FF	22	GLI3	GLI3	0
GLI3_only_first_motif.jpwm|GLI3_Hand2_third_motif.jpwm|FF|26	1	100	0.2	0.512471	5	1.56106	0.118508	1	GLI3_only_first_motif	GLI3_Hand2_third_motif	FF	26	GLI3	GLI3	0
GLI3_only_first_motif.jpwm|GLI3_Hand2_third_motif.jpwm|FF|35	1	100	0.19	0.442559	5.26316	1.83026	0.0672105	1	GLI3_only_first_motif	GLI3_Hand2_third_motif	FF	35	GLI3	GLI3	0
GLI3_only_first_motif.jpwm|GLI3_Hand2_third_motif.jpwm|FF|34	1	100	0.14	0.348735	7.14286	2.46606	0.013661	1	GLI3_only_first_motif	GLI3_Hand2_third_motif	FF	34	GLI3	GLI3	0
GLI3_only_first_motif.jpwm|GLI3_Hand2_third_motif.jpwm|FF|30	2	100	0.17	0.450701	11.7647	4.06034	4.90008e-05	2	GLI3_only_first_motif	GLI3_Hand2_third_motif	FF	30	GLI3	GLI3	0
GLI3_only_first_motif.jpwm|GLI3_Hand2_third_motif.jpwm|FF|33	1	100	0.2	0.449467	5	1.77989	0.0750944	1	GLI3_only_first_motif	GLI3_Hand2_third_motif	FF	33	GLI3	GLI3	0
GLI3_only_first_motif.jpwm|GLI3_Hand2_third_motif.jpwm|FF|32	1	100	0.08	0.27266	12.5	3.37417	0.000740396	1	GLI3_only_first_motif	GLI3_Hand2_third_motif	FF	32	GLI3	GLI3	0
GLI3_only_first_motif.jpwm|GLI3_Hand2_third_motif.jpwm|FF|39	1	100	0.26	0.463191	3.84615	1.59761	0.110129	1	GLI3_only_first_motif	GLI3_Hand2_third_motif	FF	39	GLI3	GLI3	0
GLI3_only_first_motif.jpwm|GLI3_Hand2_third_motif.jpwm|FF|38	1	100	0.19	0.464823	5.26316	1.7426	0.0814039	1	GLI3_only_first_motif	GLI3_Hand2_third_motif	FF	38	GLI3	GLI3	0
GLI3_only_first_motif.jpwm|GLI3_Hand2_third_motif.jpwm|FF|4	1	100	0.18	0.457927	5.55556	1.79068	0.0733448	1	GLI3_only_first_motif	GLI3_Hand2_third_motif	FF	4	GLI3	GLI3	0
GLI3_only_first_motif.jpwm|GLI3_Hand2_third_motif.jpwm|FF|53	1	100	0.22	0.416333	4.54545	1.8735	0.0609995	1	GLI3_only_first_motif	GLI3_Hand2_third_motif	FF	53	GLI3	GLI3	0
GLI3_only_first_motif.jpwm|GLI3_Hand2_third_motif.jpwm|FF|52	2	100	0.21	0.456048	9.52381	3.92503	8.67206e-05	2	GLI3_only_first_motif	GLI3_Hand2_third_motif	FF	52	GLI3	GLI3	0
GLI3_only_first_motif.jpwm|GLI3_Hand2_third_motif.jpwm|FF|51	2	100	0.21	0.456048	9.52381	3.92503	8.67206e-05	2	GLI3_only_first_motif	GLI3_Hand2_third_motif	FF	51	GLI3	GLI3	0
GLI3_only_first_motif.jpwm|GLI3_Hand2_third_motif.jpwm|FF|3	3	100	0.14	0.376588	21.4286	7.59452	3.08946e-14	3	GLI3_only_first_motif	GLI3_Hand2_third_motif	FF	3	GLI3	GLI3	0
GLI3_only_first_motif.jpwm|GLI3_Hand2_third_motif.jpwm|FF|1	2	100	0.19	0.464823	10.5263	3.89395	9.86235e-05	2	GLI3_only_first_motif	GLI3_Hand2_third_motif	FF	1	GLI3	GLI3	0
GLI3_only_first_motif.jpwm|GLI3_Hand2_third_motif.jpwm|FF|0	3	100	0.23	0.468287	13.0435	5.91517	3.31527e-09	3	GLI3_only_first_motif	GLI3_Hand2_third_motif	FF	0	GLI3	GLI3	0
GLI3_only_first_motif.jpwm|GLI3_Hand2_third_motif.jpwm|FF|6	2	100	0.22	0.483673	9.09091	3.68017	0.000233075	2	GLI3_only_first_motif	GLI3_Hand2_third_motif	FF	6	GLI3	GLI3	0
GLI3_only_first_motif.jpwm|GLI3_Hand2_third_motif.jpwm|FF|69	1	100	0.2	0.512471	5	1.56106	0.118508	1	GLI3_only_first_motif	GLI3_Hand2_third_motif	FF	69	GLI3	GLI3	0
GLI3_only_first_motif.jpwm|GLI3_Hand2_third_motif.jpwm|FF|67	1	100	0.16	0.419716	6.25	2.00135	0.0453544	1	GLI3_only_first_motif	GLI3_Hand2_third_motif	FF	67	GLI3	GLI3	0
GLI3_only_first_motif.jpwm|GLI3_Hand2_third_motif.jpwm|FF|63	1	100	0.13	0.337998	7.69231	2.57398	0.0100535	1	GLI3_only_first_motif	GLI3_Hand2_third_motif	FF	63	GLI3	GLI3	0
GLI3_only_first_motif.jpwm|GLI3_Hand2_third_motif.jpwm|FF|71	2	100	0.12	0.383498	16.6667	4.90224	9.47489e-07	2	GLI3_only_first_motif	GLI3_Hand2_third_motif	FF	71	GLI3	GLI3	0
GLI3_only_first_motif.jpwm|GLI3_Hand2_third_motif.jpwm|FF|73	2	100	0.24	0.552679	8.33333	3.18449	0.00145011	2	GLI3_only_first_motif	GLI3_Hand2_third_motif	FF	73	GLI3	GLI3	0
GLI3_only_first_motif.jpwm|GLI3_Hand2_third_motif.jpwm|FF|75	1	100	0.23	0.547815	4.34783	1.40558	0.159848	1	GLI3_only_first_motif	GLI3_Hand2_third_motif	FF	75	GLI3	GLI3	0
GLI3_only_first_motif.jpwm|GLI3_Hand2_third_motif.jpwm|FF|74	1	100	0.15	0.457817	6.66667	1.85664	0.0633625	1	GLI3_only_first_motif	GLI3_Hand2_third_motif	FF	74	GLI3	GLI3	0
GLI3_only_first_motif.jpwm|GLI3_Hand2_third_motif.jpwm|FF|7	1	100	0.16	0.443129	6.25	1.89561	0.0580118	1	GLI3_only_first_motif	GLI3_Hand2_third_motif	FF	7	GLI3	GLI3	0
GLI3_only_first_motif.jpwm|GLI3_Hand2_third_motif.jpwm|FF|86	1	100	0.2	0.492366	5	1.62481	0.104204	1	GLI3_only_first_motif	GLI3_Hand2_third_motif	FF	86	GLI3	GLI3	0
GLI3_only_first_motif.jpwm|GLI3_Hand2_third_motif.jpwm|FF|87	1	100	0.15	0.411329	6.66667	2.06647	0.0387841	1	GLI3_only_first_motif	GLI3_Hand2_third_motif	FF	87	GLI3	GLI3	0
GLI3_only_first_motif.jpwm|GLI3_Hand2_third_motif.jpwm|FF|80	2	100	0.18	0.43531	11.1111	4.18093	2.90323e-05	2	GLI3_only_first_motif	GLI3_Hand2_third_motif	FF	80	GLI3	GLI3	0
GLI3_only_first_motif.jpwm|GLI3_Hand2_third_motif.jpwm|FF|83	3	100	0.19	0.419114	15.7895	6.70462	2.01932e-11	3	GLI3_only_first_motif	GLI3_Hand2_third_motif	FF	83	GLI3	GLI3	0
GLI3_only_first_motif.jpwm|GLI3_Hand2_third_motif.jpwm|FF|62	1	100	0.17	0.403395	5.88235	2.05754	0.0396345	1	GLI3_only_first_motif	GLI3_Hand2_third_motif	FF	62	GLI3	GLI3	0
GLI3_only_first_motif.jpwm|GLI3_Hand2_third_motif.jpwm|FF|61	1	100	0.14	0.376588	7.14286	2.28367	0.0223912	1	GLI3_only_first_motif	GLI3_Hand2_third_motif	FF	61	GLI3	GLI3	0
GLI3_only_first_motif.jpwm|GLI3_Hand2_third_motif.jpwm|FF|97	1	100	0.18	0.457927	5.55556	1.79068	0.0733448	1	GLI3_only_first_motif	GLI3_Hand2_third_motif	FF	97	GLI3	GLI3	0
GLI3_only_first_motif.jpwm|GLI3_Hand2_third_motif.jpwm|FF|99	2	100	0.11	0.314466	18.1818	6.01019	1.85308e-09	2	GLI3_only_first_motif	GLI3_Hand2_third_motif	FF	99	GLI3	GLI3	0
M04150_2.00.jpwm|GLI3_Hand2_third_motif.jpwm|FF|58	1	100	0.32	0.529532	3.125	1.28415	0.199088	1	Hand2	GLI3_Hand2_third_motif	FF	58	Hand2	GLI3	1
M04150_2.00.jpwm|GLI3_Hand2_third_motif.jpwm|FF|51	2	100	0.42	0.638496	4.7619	2.47457	0.0133398	2	Hand2	GLI3_Hand2_third_motif	FF	51	Hand2	GLI3	1
M04150_2.00.jpwm|GLI3_Hand2_third_motif.jpwm|FF|55	8	100	0.29	0.555869	27.5862	13.8702	9.60295e-44	8	Hand2	GLI3_Hand2_third_motif	FF	55	Hand2	GLI3	1
M04150_2.00.jpwm|GLI3_Hand2_third_motif.jpwm|FF|48	1	100	0.26	0.504925	3.84615	1.46556	0.142767	1	Hand2	GLI3_Hand2_third_motif	FF	48	Hand2	GLI3	1
M04150_2.00.jpwm|GLI3_Hand2_third_motif.jpwm|FF|40	1	100	0.37	0.562372	2.7027	1.12025	0.262605	1	Hand2	GLI3_Hand2_third_motif	FF	40	Hand2	GLI3	1
M04150_2.00.jpwm|GLI3_Hand2_third_motif.jpwm|FF|43	2	100	0.39	0.680092	5.12821	2.36733	0.0179171	2	Hand2	GLI3_Hand2_third_motif	FF	43	Hand2	GLI3	1
M04150_2.00.jpwm|GLI3_Hand2_third_motif.jpwm|FF|74	1	100	0.29	0.53739	3.44828	1.3212	0.186434	1	Hand2	GLI3_Hand2_third_motif	FF	74	Hand2	GLI3	1
M04150_2.00.jpwm|GLI3_Hand2_third_motif.jpwm|FF|77	1	100	0.19	0.419114	5.26316	1.93265	0.0532795	1	Hand2	GLI3_Hand2_third_motif	FF	77	Hand2	GLI3	1
M04150_2.00.jpwm|GLI3_Hand2_third_motif.jpwm|FF|73	1	100	0.27	0.529055	3.7037	1.37982	0.167642	1	Hand2	GLI3_Hand2_third_motif	FF	73	Hand2	GLI3	1
M04150_2.00.jpwm|GLI3_Hand2_third_motif.jpwm|FF|67	1	100	0.31	0.544857	3.22581	1.26639	0.205374	1	Hand2	GLI3_Hand2_third_motif	FF	67	Hand2	GLI3	1
M04150_2.00.jpwm|GLI3_Hand2_third_motif.jpwm|FF|69	1	100	0.2	0.471405	5	1.69706	0.089686	1	Hand2	GLI3_Hand2_third_motif	FF	69	Hand2	GLI3	1
M04150_2.00.jpwm|GLI3_Hand2_third_motif.jpwm|FF|16	1	100	0.24	0.473969	4.16667	1.60348	0.108829	1	Hand2	GLI3_Hand2_third_motif	FF	16	Hand2	GLI3	1
M04150_2.00.jpwm|GLI3_Hand2_third_motif.jpwm|FF|17	2	100	0.33	0.53286	6.06061	3.13403	0.00172421	2	Hand2	GLI3_Hand2_third_motif	FF	17	Hand2	GLI3	1
M04150_2.00.jpwm|GLI3_Hand2_third_motif.jpwm|FF|14	1	100	0.37	0.661419	2.7027	0.952498	0.340844	1	Hand2	GLI3_Hand2_third_motif	FF	14	Hand2	GLI3	1
M04150_2.00.jpwm|GLI3_Hand2_third_motif.jpwm|FF|15	1	100	0.24	0.494822	4.16667	1.53591	0.124561	1	Hand2	GLI3_Hand2_third_motif	FF	15	Hand2	GLI3	1
M04150_2.00.jpwm|GLI3_Hand2_third_motif.jpwm|FF|10	1	100	0.34	0.606697	2.94118	1.08786	0.276658	1	Hand2	GLI3_Hand2_third_motif	FF	10	Hand2	GLI3	1
M04150_2.00.jpwm|GLI3_Hand2_third_motif.jpwm|FF|11	7	100	0.33	0.603943	21.2121	11.0441	2.34144e-28	7	Hand2	GLI3_Hand2_third_motif	FF	11	Hand2	GLI3	1
M04150_2.00.jpwm|GLI3_Hand2_third_motif.jpwm|FF|18	2	100	0.35	0.592461	5.71429	2.78499	0.00535288	2	Hand2	GLI3_Hand2_third_motif	FF	18	Hand2	GLI3	1
M04150_2.00.jpwm|GLI3_Hand2_third_motif.jpwm|FF|19	2	100	0.37	0.630135	5.40541	2.58675	0.00968872	2	Hand2	GLI3_Hand2_third_motif	FF	19	Hand2	GLI3	1
M04150_2.00.jpwm|GLI3_Hand2_third_motif.jpwm|FF|31	1	100	0.22	0.504124	4.54545	1.54724	0.121806	1	Hand2	GLI3_Hand2_third_motif	FF	31	Hand2	GLI3	1
M04150_2.00.jpwm|GLI3_Hand2_third_motif.jpwm|FF|32	2	100	0.35	0.55732	5.71429	2.96059	0.00307046	2	Hand2	GLI3_Hand2_third_motif	FF	32	Hand2	GLI3	1
M04150_2.00.jpwm|GLI3_Hand2_third_motif.jpwm|FF|29	1	100	0.47	0.642831	2.12766	0.824477	0.409668	1	Hand2	GLI3_Hand2_third_motif	FF	29	Hand2	GLI3	1
M04150_2.00.jpwm|GLI3_Hand2_third_motif.jpwm|FF|28	1	100	0.24	0.494822	4.16667	1.53591	0.124561	1	Hand2	GLI3_Hand2_third_motif	FF	28	Hand2	GLI3	1
M04150_2.00.jpwm|GLI3_Hand2_third_motif.jpwm|FF|9	1	100	0.43	0.655282	2.32558	0.869855	0.38438	1	Hand2	GLI3_Hand2_third_motif	FF	9	Hand2	GLI3	1
M04150_2.00.jpwm|GLI3_Hand2_third_motif.jpwm|FF|7	1	100	0.33	0.58698	3.0303	1.14144	0.253689	1	Hand2	GLI3_Hand2_third_motif	FF	7	Hand2	GLI3	1
M04150_2.00.jpwm|GLI3_Hand2_third_motif.jpwm|FF|100	1	100	0.37	0.580056	2.7027	1.0861	0.277434	1	Hand2	GLI3_Hand2_third_motif	FF	100	Hand2	GLI3	1
M04150_2.00.jpwm|GLI3_Hand2_third_motif.jpwm|FF|93	1	100	0.22	0.462317	4.54545	1.68715	0.091574	1	Hand2	GLI3_Hand2_third_motif	FF	93	Hand2	GLI3	1
M04150_2.00.jpwm|GLI3_Hand2_third_motif.jpwm|FF|88	1	100	0.27	0.583528	3.7037	1.25101	0.210931	1	Hand2	GLI3_Hand2_third_motif	FF	88	Hand2	GLI3	1
M04150_2.00.jpwm|GLI3_Hand2_third_motif.jpwm|FF|85	1	100	0.33	0.569512	3.0303	1.17645	0.239416	1	Hand2	GLI3_Hand2_third_motif	FF	85	Hand2	GLI3	1
M04150_2.00.jpwm|GLI3_Hand2_third_motif.jpwm|FF|87	5	100	0.23	0.489382	21.7391	9.74698	1.90032e-22	5	Hand2	GLI3_Hand2_third_motif	FF	87	Hand2	GLI3	1
GLI3_Hand2_second_motif.jpwm|GLI3_only_first_motif.jpwm|FF|58	2	100	0.73	0.919541	2.73973	1.38112	0.167241	2	GLI3_Hand2_second_motif	GLI3_only_first_motif	FF	58	GLI3	GLI3	0
GLI3_Hand2_second_motif.jpwm|GLI3_only_first_motif.jpwm|FR|28	3	100	0.72	0.85375	4.16667	2.67057	0.00757223	2	GLI3_Hand2_second_motif	GLI3_only_first_motif	FR	28	GLI3	GLI3	0
GLI3_Hand2_second_motif.jpwm|GLI3_only_first_motif.jpwm|FR|29	6	100	0.8	0.876172	7.5	5.93491	2.94007e-09	6	GLI3_Hand2_second_motif	GLI3_only_first_motif	FR	29	GLI3	GLI3	0
GLI3_Hand2_second_motif.jpwm|GLI3_only_first_motif.jpwm|FR|21	5	100	0.71	0.868006	7.04225	4.94236	7.71816e-07	3	GLI3_Hand2_second_motif	GLI3_only_first_motif	FR	21	GLI3	GLI3	0
GLI3_Hand2_second_motif.jpwm|GLI3_only_first_motif.jpwm|RF|9	1	100	0.89	1.01399	1.1236	0.108482	0.913613	1	GLI3_Hand2_second_motif	GLI3_only_first_motif	RF	9	GLI3	GLI3	0
GLI3_Hand2_second_motif.jpwm|GLI3_only_first_motif.jpwm|RF|3	4	100	0.72	0.817486	5.55556	4.0123	6.01293e-05	4	GLI3_Hand2_second_motif	GLI3_only_first_motif	RF	3	GLI3	GLI3	0
GLI3_Hand2_second_motif.jpwm|GLI3_only_first_motif.jpwm|RF|1	1	100	0.86	0.899158	1.16279	0.155701	0.876269	1	GLI3_Hand2_second_motif	GLI3_only_first_motif	RF	1	GLI3	GLI3	0
GLI3_Hand2_second_motif.jpwm|GLI3_only_first_motif.jpwm|RF|0	1	100	1.25	1.02863	0.8	-0.243042	0.807973	1	GLI3_Hand2_second_motif	GLI3_only_first_motif	RF	0	GLI3	GLI3	0
GLI3_Hand2_second_motif.jpwm|GLI3_only_first_motif.jpwm|RF|7	1	100	0.65	0.757121	1.53846	0.462277	0.643882	1	GLI3_Hand2_second_motif	GLI3_only_first_motif	RF	7	GLI3	GLI3	0
GLI3_Hand2_second_motif.jpwm|GLI3_only_first_motif.jpwm|RF|6	1	100	0.73	0.851084	1.36986	0.317243	0.75106	1	GLI3_Hand2_second_motif	GLI3_only_first_motif	RF	6	GLI3	GLI3	0
GLI3_Hand2_second_motif.jpwm|GLI3_only_first_motif.jpwm|RF|5	1	100	0.64	0.85894	1.5625	0.419121	0.675127	1	GLI3_Hand2_second_motif	GLI3_only_first_motif	RF	5	GLI3	GLI3	0
GLI3_Hand2_second_motif.jpwm|GLI3_only_first_motif.jpwm|RF|4	1	100	0.72	0.8655	1.38889	0.323512	0.746307	1	GLI3_Hand2_second_motif	GLI3_only_first_motif	RF	4	GLI3	GLI3	0
GLI3_Hand2_second_motif.jpwm|GLI3_only_first_motif.jpwm|RF|93	4	100	0.49	0.703455	8.16327	4.98966	6.04855e-07	4	GLI3_Hand2_second_motif	GLI3_only_first_motif	RF	93	GLI3	GLI3	0
GLI3_Hand2_second_motif.jpwm|GLI3_only_first_motif.jpwm|RF|99	2	100	0.6	0.80403	3.33333	1.74123	0.0816436	2	GLI3_Hand2_second_motif	GLI3_only_first_motif	RF	99	GLI3	GLI3	0
GLI3_Hand2_second_motif.jpwm|GLI3_only_first_motif.jpwm|RF|78	2	100	0.73	0.919541	2.73973	1.38112	0.167241	2	GLI3_Hand2_second_motif	GLI3_only_first_motif	RF	78	GLI3	GLI3	0
GLI3_Hand2_second_motif.jpwm|GLI3_only_first_motif.jpwm|RF|75	1	100	0.75	0.880484	1.33333	0.283935	0.77646	1	GLI3_Hand2_second_motif	GLI3_only_first_motif	RF	75	GLI3	GLI3	0
GLI3_Hand2_second_motif.jpwm|GLI3_only_first_motif.jpwm|RF|74	5	100	0.67	0.921735	7.46269	4.69766	2.63158e-06	5	GLI3_Hand2_second_motif	GLI3_only_first_motif	RF	74	GLI3	GLI3	0
GLI3_Hand2_second_motif.jpwm|GLI3_only_first_motif.jpwm|RF|77	1	100	0.61	0.827495	1.63934	0.471302	0.637425	1	GLI3_Hand2_second_motif	GLI3_only_first_motif	RF	77	GLI3	GLI3	0
GLI3_Hand2_second_motif.jpwm|GLI3_only_first_motif.jpwm|RF|76	3	100	0.56	0.78264	5.35714	3.11765	0.00182297	3	GLI3_Hand2_second_motif	GLI3_only_first_motif	RF	76	GLI3	GLI3	0
GLI3_Hand2_second_motif.jpwm|GLI3_only_first_motif.jpwm|RF|73	2	100	0.65	0.857233	3.07692	1.57483	0.115295	2	GLI3_Hand2_second_motif	GLI3_only_first_motif	RF	73	GLI3	GLI3	0
GLI3_Hand2_second_motif.jpwm|GLI3_only_first_motif.jpwm|RF|72	2	100	0.58	0.727247	3.44828	1.95257	0.0508708	2	GLI3_Hand2_second_motif	GLI3_only_first_motif	RF	72	GLI3	GLI3	0
GLI3_Hand2_second_motif.jpwm|GLI3_only_first_motif.jpwm|FR|17	3	100	0.67	0.888251	4.47761	2.62313	0.00871254	3	GLI3_Hand2_second_motif	GLI3_only_first_motif	FR	17	GLI3	GLI3	0
GLI3_Hand2_second_motif.jpwm|GLI3_only_first_motif.jpwm|FR|16	1	100	0.65	0.857233	1.53846	0.40829	0.683061	1	GLI3_Hand2_second_motif	GLI3_only_first_motif	FR	16	GLI3	GLI3	0
GLI3_Hand2_second_motif.jpwm|GLI3_only_first_motif.jpwm|FR|15	2	100	0.78	0.823641	2.5641	1.48123	0.138546	2	GLI3_Hand2_second_motif	GLI3_only_first_motif	FR	15	GLI3	GLI3	0
GLI3_Hand2_second_motif.jpwm|GLI3_only_first_motif.jpwm|FR|14	2	100	0.65	0.808728	3.07692	1.66929	0.0950602	2	GLI3_Hand2_second_motif	GLI3_only_first_motif	FR	14	GLI3	GLI3	0
GLI3_Hand2_second_motif.jpwm|GLI3_only_first_motif.jpwm|FR|13	2	100	0.74	0.87178	2.7027	1.44532	0.148368	2	GLI3_Hand2_second_motif	GLI3_only_first_motif	FR	13	GLI3	GLI3	0
GLI3_Hand2_second_motif.jpwm|GLI3_only_first_motif.jpwm|FR|12	1	100	0.65	0.868936	1.53846	0.402791	0.687102	1	GLI3_Hand2_second_motif	GLI3_only_first_motif	FR	12	GLI3	GLI3	0
GLI3_Hand2_second_motif.jpwm|GLI3_only_first_motif.jpwm|FR|11	1	100	0.73	0.851084	1.36986	0.317243	0.75106	1	GLI3_Hand2_second_motif	GLI3_only_first_motif	FR	11	GLI3	GLI3	0
GLI3_Hand2_second_motif.jpwm|GLI3_only_first_motif.jpwm|FR|10	1	100	0.57	0.768772	1.75439	0.559334	0.575934	1	GLI3_Hand2_second_motif	GLI3_only_first_motif	FR	10	GLI3	GLI3	0
GLI3_Hand2_second_motif.jpwm|GLI3_only_first_motif.jpwm|FR|19	2	100	0.69	0.906709	2.89855	1.44479	0.148518	2	GLI3_Hand2_second_motif	GLI3_only_first_motif	FR	19	GLI3	GLI3	0
GLI3_Hand2_second_motif.jpwm|GLI3_only_first_motif.jpwm|FR|18	2	100	0.91	0.888706	2.1978	1.2265	0.22001	2	GLI3_Hand2_second_motif	GLI3_only_first_motif	FR	18	GLI3	GLI3	0
GLI3_Hand2_second_motif.jpwm|GLI3_only_first_motif.jpwm|FR|22	1	100	0.67	0.865209	1.49254	0.381411	0.702898	1	GLI3_Hand2_second_motif	GLI3_only_first_motif	FR	22	GLI3	GLI3	0
GLI3_Hand2_second_motif.jpwm|GLI3_only_first_motif.jpwm|FR|23	2	100	0.67	0.725509	2.98507	1.8332	0.0667736	2	GLI3_Hand2_second_motif	GLI3_only_first_motif	FR	23	GLI3	GLI3	0
GLI3_Hand2_second_motif.jpwm|GLI3_only_first_motif.jpwm|FR|20	4	100	0.57	0.728288	7.01754	4.70967	2.48115e-06	3	GLI3_Hand2_second_motif	GLI3_only_first_motif	FR	20	GLI3	GLI3	0
GLI3_Hand2_second_motif.jpwm|GLI3_only_first_motif.jpwm|FR|27	1	100	0.57	0.742028	1.75439	0.579493	0.562257	1	GLI3_Hand2_second_motif	GLI3_only_first_motif	FR	27	GLI3	GLI3	0
GLI3_Hand2_second_motif.jpwm|GLI3_only_first_motif.jpwm|FR|24	2	100	0.57	0.755518	3.50877	1.89274	0.0583924	1	GLI3_Hand2_second_motif	GLI3_only_first_motif	FR	24	GLI3	GLI3	0
GLI3_Hand2_second_motif.jpwm|GLI3_only_first_motif.jpwm|FR|25	2	100	0.56	0.78264	3.57143	1.83993	0.065779	2	GLI3_Hand2_second_motif	GLI3_only_first_motif	FR	25	GLI3	GLI3	0
GLI3_Hand2_second_motif.jpwm|GLI3_only_first_motif.jpwm|RF|80	1	100	0.52	0.731402	1.92308	0.656273	0.511648	1	GLI3_Hand2_second_motif	GLI3_only_first_motif	RF	80	GLI3	GLI3	0
GLI3_Hand2_second_motif.jpwm|GLI3_only_first_motif.jpwm|RF|81	2	100	0.7	0.904534	2.85714	1.4372	0.15066	2	GLI3_Hand2_second_motif	GLI3_only_first_motif	RF	81	GLI3	GLI3	0
GLI3_Hand2_second_motif.jpwm|GLI3_only_first_motif.jpwm|RF|83	1	100	0.74	0.916956	1.35135	0.283547	0.776758	1	GLI3_Hand2_second_motif	GLI3_only_first_motif	RF	83	GLI3	GLI3	0
GLI3_Hand2_second_motif.jpwm|GLI3_only_first_motif.jpwm|RF|85	1	100	0.72	0.725857	1.38889	0.385751	0.699681	1	GLI3_Hand2_second_motif	GLI3_only_first_motif	RF	85	GLI3	GLI3	0
GLI3_Hand2_second_motif.jpwm|GLI3_only_first_motif.jpwm|RF|86	1	100	0.58	0.754515	1.72414	0.556649	0.577767	1	GLI3_Hand2_second_motif	GLI3_only_first_motif	RF	86	GLI3	GLI3	0
GLI3_Hand2_second_motif.jpwm|GLI3_only_first_motif.jpwm|RF|87	2	100	0.61	0.80271	3.27869	1.73163	0.0833388	2	GLI3_Hand2_second_motif	GLI3_only_first_motif	RF	87	GLI3	GLI3	0
GLI3_Hand2_second_motif.jpwm|GLI3_only_first_motif.jpwm|RF|89	1	100	0.61	0.75069	1.63934	0.519522	0.603397	1	GLI3_Hand2_second_motif	GLI3_only_first_motif	RF	89	GLI3	GLI3	0
GLI3_Hand2_second_motif.jpwm|GLI3_only_first_motif.jpwm|RF|68	1	100	0.53	0.809726	1.88679	0.580443	0.561616	1	GLI3_Hand2_second_motif	GLI3_only_first_motif	RF	68	GLI3	GLI3	0
GLI3_Hand2_second_motif.jpwm|GLI3_only_first_motif.jpwm|RF|69	3	100	0.52	0.717459	5.76923	3.45664	0.000546948	3	GLI3_Hand2_second_motif	GLI3_only_first_motif	RF	69	GLI3	GLI3	0
GLI3_Hand2_second_motif.jpwm|GLI3_only_first_motif.jpwm|RF|66	2	100	0.67	0.829445	2.98507	1.60348	0.108829	2	GLI3_Hand2_second_motif	GLI3_only_first_motif	RF	66	GLI3	GLI3	0
GLI3_Hand2_second_motif.jpwm|GLI3_only_first_motif.jpwm|RF|67	3	100	0.58	0.713223	5.17241	3.39305	0.000691193	3	GLI3_Hand2_second_motif	GLI3_only_first_motif	RF	67	GLI3	GLI3	0
GLI3_Hand2_second_motif.jpwm|GLI3_only_first_motif.jpwm|RF|63	3	100	0.58	0.830966	5.17241	2.91227	0.0035881	3	GLI3_Hand2_second_motif	GLI3_only_first_motif	RF	63	GLI3	GLI3	0
GLI3_Hand2_second_motif.jpwm|GLI3_only_first_motif.jpwm|RF|60	1	100	0.68	0.789834	1.47059	0.405148	0.685369	1	GLI3_Hand2_second_motif	GLI3_only_first_motif	RF	60	GLI3	GLI3	0
GLI3_Hand2_second_motif.jpwm|GLI3_only_first_motif.jpwm|FF|84	1	100	0.74	0.786502	1.35135	0.330578	0.740964	1	GLI3_Hand2_second_motif	GLI3_only_first_motif	FF	84	GLI3	GLI3	0
GLI3_Hand2_second_motif.jpwm|GLI3_only_first_motif.jpwm|RF|58	1	100	0.63	0.895048	1.5873	0.413386	0.679324	1	GLI3_Hand2_second_motif	GLI3_only_first_motif	RF	58	GLI3	GLI3	0
GLI3_Hand2_second_motif.jpwm|GLI3_only_first_motif.jpwm|FR|100	1	100	0.62	0.762505	1.6129	0.498357	0.618232	1	GLI3_Hand2_second_motif	GLI3_only_first_motif	FR	100	GLI3	GLI3	0
GLI3_Hand2_second_motif.jpwm|GLI3_only_first_motif.jpwm|FR|94	1	100	0.67	0.97499	1.49254	0.338465	0.735013	1	GLI3_Hand2_second_motif	GLI3_only_first_motif	FR	94	GLI3	GLI3	0
GLI3_Hand2_second_motif.jpwm|GLI3_only_first_motif.jpwm|FR|90	1	100	0.47	0.717107	2.12766	0.739081	0.459858	1	GLI3_Hand2_second_motif	GLI3_only_first_motif	FR	90	GLI3	GLI3	0
GLI3_Hand2_second_motif.jpwm|GLI3_only_first_motif.jpwm|RF|59	2	100	0.69	0.872648	2.89855	1.50118	0.13331	2	GLI3_Hand2_second_motif	GLI3_only_first_motif	RF	59	GLI3	GLI3	0
GLI3_Hand2_second_motif.jpwm|GLI3_only_first_motif.jpwm|RF|53	1	100	0.66	0.768312	1.51515	0.442529	0.658107	1	GLI3_Hand2_second_motif	GLI3_only_first_motif	RF	53	GLI3	GLI3	0
GLI3_Hand2_second_motif.jpwm|GLI3_only_first_motif.jpwm|RF|52	2	100	0.6	0.724743	3.33333	1.93172	0.0533942	2	GLI3_Hand2_second_motif	GLI3_only_first_motif	RF	52	GLI3	GLI3	0
GLI3_Hand2_second_motif.jpwm|GLI3_only_first_motif.jpwm|RF|51	2	100	0.55	0.672324	3.63636	2.1567	0.0310293	2	GLI3_Hand2_second_motif	GLI3_only_first_motif	RF	51	GLI3	GLI3	0
GLI3_Hand2_second_motif.jpwm|GLI3_only_first_motif.jpwm|RF|57	4	100	0.72	0.792388	5.55556	4.13939	3.48236e-05	3	GLI3_Hand2_second_motif	GLI3_only_first_motif	RF	57	GLI3	GLI3	0
GLI3_Hand2_second_motif.jpwm|GLI3_only_first_motif.jpwm|RF|56	1	100	0.76	0.922447	1.31579	0.260177	0.794727	1	GLI3_Hand2_second_motif	GLI3_only_first_motif	RF	56	GLI3	GLI3	0
GLI3_Hand2_second_motif.jpwm|GLI3_only_first_motif.jpwm|RF|55	2	100	0.49	0.688946	4.08163	2.19175	0.0283973	2	GLI3_Hand2_second_motif	GLI3_only_first_motif	RF	55	GLI3	GLI3	0
GLI3_Hand2_second_motif.jpwm|GLI3_only_first_motif.jpwm|RF|54	1	100	0.71	0.85629	1.40845	0.33867	0.734858	1	GLI3_Hand2_second_motif	GLI3_only_first_motif	RF	54	GLI3	GLI3	0
GLI3_Hand2_second_motif.jpwm|GLI3_only_first_motif.jpwm|RF|97	2	100	0.68	0.897584	2.94118	1.47061	0.141395	2	GLI3_Hand2_second_motif	GLI3_only_first_motif	RF	97	GLI3	GLI3	0
GLI3_Hand2_second_motif.jpwm|GLI3_only_first_motif.jpwm|RF|96	1	100	0.45	0.729951	2.22222	0.753475	0.451164	1	GLI3_Hand2_second_motif	GLI3_only_first_motif	RF	96	GLI3	GLI3	0
GLI3_Hand2_second_motif.jpwm|GLI3_only_first_motif.jpwm|RF|95	1	100	0.68	0.85138	1.47059	0.37586	0.707021	1	GLI3_Hand2_second_motif	GLI3_only_first_motif	RF	95	GLI3	GLI3	0
GLI3_Hand2_second_motif.jpwm|GLI3_only_first_motif.jpwm|RF|92	1	100	0.57	0.714284	1.75439	0.602001	0.547173	1	GLI3_Hand2_second_motif	GLI3_only_first_motif	RF	92	GLI3	GLI3	0
GLI3_Hand2_second_motif.jpwm|GLI3_only_first_motif.jpwm|RF|90	1	100	0.72	0.899832	1.38889	0.311169	0.755672	1	GLI3_Hand2_second_motif	GLI3_only_first_motif	RF	90	GLI3	GLI3	0
GLI3_Hand2_second_motif.jpwm|GLI3_only_first_motif.jpwm|FF|35	1	100	0.83	0.93263	1.20482	0.18228	0.855363	1	GLI3_Hand2_second_motif	GLI3_only_first_motif	FF	35	GLI3	GLI3	0
GLI3_Hand2_second_motif.jpwm|GLI3_only_first_motif.jpwm|FF|37	5	100	0.93	0.934793	5.37634	4.3539	1.33734e-05	5	GLI3_Hand2_second_motif	GLI3_only_first_motif	FF	37	GLI3	GLI3	0
GLI3_Hand2_second_motif.jpwm|GLI3_only_first_motif.jpwm|FF|36	1	100	0.93	0.781801	1.07527	0.0895369	0.928655	1	GLI3_Hand2_second_motif	GLI3_only_first_motif	FF	36	GLI3	GLI3	0
GLI3_Hand2_second_motif.jpwm|GLI3_only_first_motif.jpwm|FF|32	2	100	0.9	0.969223	2.22222	1.13493	0.256405	2	GLI3_Hand2_second_motif	GLI3_only_first_motif	FF	32	GLI3	GLI3	0
GLI3_Hand2_second_motif.jpwm|GLI3_only_first_motif.jpwm|RF|44	2	100	0.7	0.84686	2.85714	1.53508	0.124764	2	GLI3_Hand2_second_motif	GLI3_only_first_motif	RF	44	GLI3	GLI3	0
GLI3_Hand2_second_motif.jpwm|GLI3_only_first_motif.jpwm|RF|46	2	100	0.79	0.844411	2.53165	1.43295	0.151872	2	GLI3_Hand2_second_motif	GLI3_only_first_motif	RF	46	GLI3	GLI3	0
GLI3_Hand2_second_motif.jpwm|GLI3_only_first_motif.jpwm|RF|47	2	100	0.67	0.841535	2.98507	1.58044	0.114005	2	GLI3_Hand2_second_motif	GLI3_only_first_motif	RF	47	GLI3	GLI3	0
GLI3_Hand2_second_motif.jpwm|GLI3_only_first_motif.jpwm|RF|40	2	100	0.59	0.739847	3.38983	1.9058	0.0566763	2	GLI3_Hand2_second_motif	GLI3_only_first_motif	RF	40	GLI3	GLI3	0
GLI3_Hand2_second_motif.jpwm|GLI3_only_first_motif.jpwm|RF|41	1	100	0.74	0.84829	1.35135	0.306499	0.759225	1	GLI3_Hand2_second_motif	GLI3_only_first_motif	RF	41	GLI3	GLI3	0
GLI3_Hand2_second_motif.jpwm|GLI3_only_first_motif.jpwm|RF|42	2	100	0.56	0.80804	3.57143	1.78209	0.0747347	2	GLI3_Hand2_second_motif	GLI3_only_first_motif	RF	42	GLI3	GLI3	0
GLI3_Hand2_second_motif.jpwm|GLI3_only_first_motif.jpwm|RF|43	1	100	0.53	0.717107	1.88679	0.655411	0.512203	1	GLI3_Hand2_second_motif	GLI3_only_first_motif	RF	43	GLI3	GLI3	0
GLI3_Hand2_second_motif.jpwm|GLI3_only_first_motif.jpwm|RF|48	1	100	0.61	0.777135	1.63934	0.501843	0.615778	1	GLI3_Hand2_second_motif	GLI3_only_first_motif	RF	48	GLI3	GLI3	0
GLI3_Hand2_second_motif.jpwm|GLI3_only_first_motif.jpwm|RF|49	2	100	0.64	0.718022	3.125	1.89409	0.0582127	2	GLI3_Hand2_second_motif	GLI3_only_first_motif	RF	49	GLI3	GLI3	0
GLI3_Hand2_second_motif.jpwm|GLI3_only_first_motif.jpwm|RF|79	2	100	0.61	0.764027	3.27869	1.81931	0.0688646	2	GLI3_Hand2_second_motif	GLI3_only_first_motif	RF	79	GLI3	GLI3	0
GLI3_Hand2_second_motif.jpwm|GLI3_only_first_motif.jpwm|RF|70	2	100	0.57	0.742028	3.50877	1.92715	0.0539609	2	GLI3_Hand2_second_motif	GLI3_only_first_motif	RF	70	GLI3	GLI3	0
GLI3_Hand2_second_motif.jpwm|GLI3_only_first_motif.jpwm|FF|25	2	100	0.84	0.928994	2.38095	1.24866	0.211789	2	GLI3_Hand2_second_motif	GLI3_only_first_motif	FF	25	GLI3	GLI3	0
GLI3_Hand2_second_motif.jpwm|GLI3_only_first_motif.jpwm|FF|28	2	100	0.76	0.88899	2.63158	1.39484	0.163064	2	GLI3_Hand2_second_motif	GLI3_only_first_motif	FF	28	GLI3	GLI3	0
GLI3_Hand2_second_motif.jpwm|GLI3_only_first_motif.jpwm|FF|29	1	100	0.75	0.808728	1.33333	0.309128	0.757224	1	GLI3_Hand2_second_motif	GLI3_only_first_motif	FF	29	GLI3	GLI3	0
GLI3_Hand2_second_motif.jpwm|GLI3_only_first_motif.jpwm|RF|30	1	100	0.73	0.941254	1.36986	0.286851	0.774226	1	GLI3_Hand2_second_motif	GLI3_only_first_motif	RF	30	GLI3	GLI3	0
GLI3_Hand2_second_motif.jpwm|GLI3_only_first_motif.jpwm|RF|33	1	100	0.66	0.806789	1.51515	0.421423	0.673446	1	GLI3_Hand2_second_motif	GLI3_only_first_motif	RF	33	GLI3	GLI3	0
GLI3_Hand2_second_motif.jpwm|GLI3_only_first_motif.jpwm|RF|35	3	100	0.59	0.779731	5.08475	3.09081	0.00199611	3	GLI3_Hand2_second_motif	GLI3_only_first_motif	RF	35	GLI3	GLI3	0
GLI3_Hand2_second_motif.jpwm|GLI3_only_first_motif.jpwm|RF|34	1	100	0.69	0.812715	1.44928	0.381438	0.702878	1	GLI3_Hand2_second_motif	GLI3_only_first_motif	RF	34	GLI3	GLI3	0
GLI3_Hand2_second_motif.jpwm|GLI3_only_first_motif.jpwm|RF|37	3	100	0.61	0.777135	4.91803	3.0754	0.00210222	3	GLI3_Hand2_second_motif	GLI3_only_first_motif	RF	37	GLI3	GLI3	0
GLI3_Hand2_second_motif.jpwm|GLI3_only_first_motif.jpwm|FF|85	3	100	0.58	0.780831	5.17241	3.09926	0.00194003	3	GLI3_Hand2_second_motif	GLI3_only_first_motif	FF	85	GLI3	GLI3	0
GLI3_Hand2_second_motif.jpwm|GLI3_only_first_motif.jpwm|FR|-1	3	100	0.69	0.991835	4.34783	2.32902	0.0198582	3	GLI3_Hand2_second_motif	GLI3_only_first_motif	FR	-1	GLI3	GLI3	0
GLI3_Hand2_second_motif.jpwm|GLI3_only_first_motif.jpwm|FR|-6	8	100	5.54	2.71702	1.44404	0.905402	0.365252	8	GLI3_Hand2_second_motif	GLI3_only_first_motif	FR	-6	GLI3	GLI3	0
GLI3_Hand2_second_motif.jpwm|GLI3_only_first_motif.jpwm|FR|-5	2	100	2.97	1.59833	0.673401	-0.606885	0.543927	2	GLI3_Hand2_second_motif	GLI3_only_first_motif	FR	-5	GLI3	GLI3	0
GLI3_Hand2_second_motif.jpwm|GLI3_only_first_motif.jpwm|FR|-4	4	100	0.54	0.783929	7.40741	4.41366	1.01636e-05	4	GLI3_Hand2_second_motif	GLI3_only_first_motif	FR	-4	GLI3	GLI3	0
GLI3_Hand2_second_motif.jpwm|GLI3_only_first_motif.jpwm|FF|12	1	100	1.01	1.08707	0.990099	-0.00919906	0.99266	1	GLI3_Hand2_second_motif	GLI3_only_first_motif	FF	12	GLI3	GLI3	0
GLI3_Hand2_second_motif.jpwm|GLI3_only_first_motif.jpwm|FF|11	1	100	0.77	0.86287	1.2987	0.266552	0.789814	1	GLI3_Hand2_second_motif	GLI3_only_first_motif	FF	11	GLI3	GLI3	0
GLI3_Hand2_second_motif.jpwm|GLI3_only_first_motif.jpwm|FF|10	4	100	0.99	0.999949	4.0404	3.01015	0.00261117	4	GLI3_Hand2_second_motif	GLI3_only_first_motif	FF	10	GLI3	GLI3	0
GLI3_Hand2_second_motif.jpwm|GLI3_only_first_motif.jpwm|FF|17	3	100	0.96	0.886715	3.125	2.30063	0.0214127	3	GLI3_Hand2_second_motif	GLI3_only_first_motif	FF	17	GLI3	GLI3	0
GLI3_Hand2_second_motif.jpwm|GLI3_only_first_motif.jpwm|FF|16	1	100	0.78	0.847814	1.28205	0.259491	0.795256	1	GLI3_Hand2_second_motif	GLI3_only_first_motif	FF	16	GLI3	GLI3	0
GLI3_Hand2_second_motif.jpwm|GLI3_only_first_motif.jpwm|FF|15	1	100	0.89	0.851558	1.1236	0.129175	0.897219	1	GLI3_Hand2_second_motif	GLI3_only_first_motif	FF	15	GLI3	GLI3	0
GLI3_Hand2_second_motif.jpwm|GLI3_only_first_motif.jpwm|FF|14	3	100	0.86	0.953674	3.48837	2.24395	0.0248355	3	GLI3_Hand2_second_motif	GLI3_only_first_motif	FF	14	GLI3	GLI3	0
GLI3_Hand2_second_motif.jpwm|GLI3_only_first_motif.jpwm|FF|18	1	100	0.87	0.939106	1.14943	0.13843	0.889901	1	GLI3_Hand2_second_motif	GLI3_only_first_motif	FF	18	GLI3	GLI3	0
GLI3_Hand2_second_motif.jpwm|GLI3_only_first_motif.jpwm|RF|26	14	100	0.7	0.834847	20	15.9311	3.85757e-57	14	GLI3_Hand2_second_motif	GLI3_only_first_motif	RF	26	GLI3	GLI3	0
GLI3_Hand2_second_motif.jpwm|GLI3_only_first_motif.jpwm|RF|27	1	100	0.68	0.802521	1.47059	0.398743	0.690082	1	GLI3_Hand2_second_motif	GLI3_only_first_motif	RF	27	GLI3	GLI3	0
GLI3_Hand2_second_motif.jpwm|GLI3_only_first_motif.jpwm|RF|24	2	100	0.65	0.857233	3.07692	1.57483	0.115295	2	GLI3_Hand2_second_motif	GLI3_only_first_motif	RF	24	GLI3	GLI3	0
GLI3_Hand2_second_motif.jpwm|GLI3_only_first_motif.jpwm|RF|25	3	100	0.53	0.731057	5.66038	3.37867	0.000728376	3	GLI3_Hand2_second_motif	GLI3_only_first_motif	RF	25	GLI3	GLI3	0
GLI3_Hand2_second_motif.jpwm|GLI3_only_first_motif.jpwm|RF|28	1	100	0.58	0.727247	1.72414	0.57752	0.563588	1	GLI3_Hand2_second_motif	GLI3_only_first_motif	RF	28	GLI3	GLI3	0
GLI3_Hand2_second_motif.jpwm|GLI3_only_first_motif.jpwm|RF|29	2	100	0.73	0.839131	2.73973	1.51347	0.13016	2	GLI3_Hand2_second_motif	GLI3_only_first_motif	RF	29	GLI3	GLI3	0
GLI3_Hand2_second_motif.jpwm|GLI3_only_first_motif.jpwm|FR|2	4	100	0.63	0.747454	6.34921	4.50864	6.52442e-06	4	GLI3_Hand2_second_motif	GLI3_only_first_motif	FR	2	GLI3	GLI3	0
GLI3_Hand2_second_motif.jpwm|GLI3_only_first_motif.jpwm|FR|0	2	100	0.8	0.9101	2.5	1.31854	0.187324	2	GLI3_Hand2_second_motif	GLI3_only_first_motif	FR	0	GLI3	GLI3	0
GLI3_Hand2_second_motif.jpwm|GLI3_only_first_motif.jpwm|FR|7	3	100	0.68	0.802521	4.41176	2.89089	0.00384154	3	GLI3_Hand2_second_motif	GLI3_only_first_motif	FR	7	GLI3	GLI3	0
GLI3_Hand2_second_motif.jpwm|GLI3_only_first_motif.jpwm|FR|6	1	100	0.64	0.718022	1.5625	0.501377	0.616106	1	GLI3_Hand2_second_motif	GLI3_only_first_motif	FR	6	GLI3	GLI3	0
GLI3_Hand2_second_motif.jpwm|GLI3_only_first_motif.jpwm|FR|5	2	100	0.73	0.851084	2.73973	1.49222	0.135643	2	GLI3_Hand2_second_motif	GLI3_only_first_motif	FR	5	GLI3	GLI3	0
GLI3_Hand2_second_motif.jpwm|GLI3_only_first_motif.jpwm|FR|4	4	100	0.78	0.938298	5.12821	3.43174	0.000599714	4	GLI3_Hand2_second_motif	GLI3_only_first_motif	FR	4	GLI3	GLI3	0
GLI3_Hand2_second_motif.jpwm|GLI3_only_first_motif.jpwm|FF|33	2	100	0.87	0.883691	2.29885	1.27873	0.200993	2	GLI3_Hand2_second_motif	GLI3_only_first_motif	FF	33	GLI3	GLI3	0
GLI3_Hand2_second_motif.jpwm|GLI3_only_first_motif.jpwm|RF|19	1	100	0.67	0.804721	1.49254	0.41008	0.681747	1	GLI3_Hand2_second_motif	GLI3_only_first_motif	RF	19	GLI3	GLI3	0
GLI3_Hand2_second_motif.jpwm|GLI3_only_first_motif.jpwm|RF|18	2	100	0.43	0.670519	4.65116	2.34147	0.019208	2	GLI3_Hand2_second_motif	GLI3_only_first_motif	RF	18	GLI3	GLI3	0
GLI3_Hand2_second_motif.jpwm|GLI3_only_first_motif.jpwm|RF|17	1	100	0.62	0.735534	1.6129	0.516632	0.605413	1	GLI3_Hand2_second_motif	GLI3_only_first_motif	RF	17	GLI3	GLI3	0
GLI3_Hand2_second_motif.jpwm|GLI3_only_first_motif.jpwm|RF|16	1	100	0.52	0.703239	1.92308	0.682556	0.494888	1	GLI3_Hand2_second_motif	GLI3_only_first_motif	RF	16	GLI3	GLI3	0
GLI3_Hand2_second_motif.jpwm|GLI3_only_first_motif.jpwm|RF|14	2	100	0.68	0.763829	2.94118	1.72814	0.0839638	2	GLI3_Hand2_second_motif	GLI3_only_first_motif	RF	14	GLI3	GLI3	0
GLI3_Hand2_second_motif.jpwm|GLI3_only_first_motif.jpwm|RF|13	1	100	0.68	0.839432	1.47059	0.38121	0.703047	1	GLI3_Hand2_second_motif	GLI3_only_first_motif	RF	13	GLI3	GLI3	0
GLI3_Hand2_second_motif.jpwm|GLI3_only_first_motif.jpwm|RF|12	3	100	0.51	0.75872	5.88235	3.28184	0.00103132	3	GLI3_Hand2_second_motif	GLI3_only_first_motif	RF	12	GLI3	GLI3	0
GLI3_Hand2_second_motif.jpwm|GLI3_only_first_motif.jpwm|RF|11	2	100	0.65	0.914253	3.07692	1.47662	0.139779	2	GLI3_Hand2_second_motif	GLI3_only_first_motif	RF	11	GLI3	GLI3	0
GLI3_Hand2_second_motif.jpwm|GLI3_only_first_motif.jpwm|FF|7	4	100	0.75	0.914253	5.33333	3.55481	0.000378246	4	GLI3_Hand2_second_motif	GLI3_only_first_motif	FF	7	GLI3	GLI3	0
GLI3_Hand2_second_motif.jpwm|GLI3_only_first_motif.jpwm|FF|6	2	100	0.81	0.860995	2.46914	1.38212	0.166935	2	GLI3_Hand2_second_motif	GLI3_only_first_motif	FF	6	GLI3	GLI3	0
GLI3_Hand2_second_motif.jpwm|GLI3_only_first_motif.jpwm|FF|4	5	100	0.94	0.930081	5.31915	4.36521	1.27e-05	5	GLI3_Hand2_second_motif	GLI3_only_first_motif	FF	4	GLI3	GLI3	0
GLI3_Hand2_second_motif.jpwm|GLI3_only_first_motif.jpwm|FF|3	2	100	0.89	0.87496	2.24719	1.26863	0.204573	2	GLI3_Hand2_second_motif	GLI3_only_first_motif	FF	3	GLI3	GLI3	0
GLI3_Hand2_second_motif.jpwm|GLI3_only_first_motif.jpwm|FF|2	2	100	0.8	0.887625	2.5	1.35192	0.1764	2	GLI3_Hand2_second_motif	GLI3_only_first_motif	FF	2	GLI3	GLI3	0
GLI3_Hand2_second_motif.jpwm|GLI3_only_first_motif.jpwm|FF|1	6	100	0.84	0.981856	7.14286	5.25536	1.47739e-07	6	GLI3_Hand2_second_motif	GLI3_only_first_motif	FF	1	GLI3	GLI3	0
GLI3_Hand2_second_motif.jpwm|GLI3_only_first_motif.jpwm|FF|9	5	100	0.9	1.06837	5.55556	3.83762	0.000124231	5	GLI3_Hand2_second_motif	GLI3_only_first_motif	FF	9	GLI3	GLI3	0
GLI3_Hand2_second_motif.jpwm|GLI3_only_first_motif.jpwm|FF|8	1	100	0.84	0.971513	1.19048	0.164691	0.869187	1	GLI3_Hand2_second_motif	GLI3_only_first_motif	FF	8	GLI3	GLI3	0
GLI3_Hand2_second_motif.jpwm|GLI3_only_first_motif.jpwm|FR|99	1	100	0.59	0.779731	1.69492	0.525823	0.599011	1	GLI3_Hand2_second_motif	GLI3_only_first_motif	FR	99	GLI3	GLI3	0
GLI3_Hand2_second_motif.jpwm|GLI3_only_first_motif.jpwm|FR|98	2	100	0.52	0.758521	3.84615	1.95117	0.0510372	2	GLI3_Hand2_second_motif	GLI3_only_first_motif	FR	98	GLI3	GLI3	0
GLI3_Hand2_second_motif.jpwm|GLI3_only_first_motif.jpwm|FR|97	2	100	0.52	0.703239	3.84615	2.10455	0.0353308	2	GLI3_Hand2_second_motif	GLI3_only_first_motif	FR	97	GLI3	GLI3	0
GLI3_Hand2_second_motif.jpwm|GLI3_only_first_motif.jpwm|FR|96	1	100	0.58	0.767786	1.72414	0.547028	0.58436	1	GLI3_Hand2_second_motif	GLI3_only_first_motif	FR	96	GLI3	GLI3	0
GLI3_Hand2_second_motif.jpwm|GLI3_only_first_motif.jpwm|FF|78	2	100	0.68	0.863163	2.94118	1.52926	0.1262	2	GLI3_Hand2_second_motif	GLI3_only_first_motif	FF	78	GLI3	GLI3	0
GLI3_Hand2_second_motif.jpwm|GLI3_only_first_motif.jpwm|FF|71	1	100	0.84	0.872938	1.19048	0.183289	0.854571	1	GLI3_Hand2_second_motif	GLI3_only_first_motif	FF	71	GLI3	GLI3	0
GLI3_Hand2_second_motif.jpwm|GLI3_only_first_motif.jpwm|FF|72	1	100	0.78	0.894201	1.28205	0.24603	0.805659	1	GLI3_Hand2_second_motif	GLI3_only_first_motif	FF	72	GLI3	GLI3	0
GLI3_Hand2_second_motif.jpwm|GLI3_only_first_motif.jpwm|FF|75	1	100	0.72	0.8655	1.38889	0.323512	0.746307	1	GLI3_Hand2_second_motif	GLI3_only_first_motif	FF	75	GLI3	GLI3	0
GLI3_Hand2_second_motif.jpwm|GLI3_only_first_motif.jpwm|FF|76	2	100	0.72	0.85375	2.77778	1.49927	0.133804	2	GLI3_Hand2_second_motif	GLI3_only_first_motif	FF	76	GLI3	GLI3	0
GLI3_Hand2_second_motif.jpwm|GLI3_only_first_motif.jpwm|FR|82	2	100	0.62	0.707535	3.22581	1.95043	0.0511245	2	GLI3_Hand2_second_motif	GLI3_only_first_motif	FR	82	GLI3	GLI3	0
GLI3_Hand2_second_motif.jpwm|GLI3_only_first_motif.jpwm|FR|84	2	100	0.52	0.658741	3.84615	2.24671	0.0246585	2	GLI3_Hand2_second_motif	GLI3_only_first_motif	FR	84	GLI3	GLI3	0
GLI3_Hand2_second_motif.jpwm|GLI3_only_first_motif.jpwm|FR|85	3	100	0.65	0.79614	4.61538	2.95174	0.00315985	2	GLI3_Hand2_second_motif	GLI3_only_first_motif	FR	85	GLI3	GLI3	0
GLI3_Hand2_second_motif.jpwm|GLI3_only_first_motif.jpwm|FR|86	2	100	0.56	0.700937	3.57143	2.05439	0.0399378	2	GLI3_Hand2_second_motif	GLI3_only_first_motif	FR	86	GLI3	GLI3	0
GLI3_Hand2_second_motif.jpwm|GLI3_only_first_motif.jpwm|FR|88	1	100	0.53	0.744746	1.88679	0.631088	0.527983	1	GLI3_Hand2_second_motif	GLI3_only_first_motif	FR	88	GLI3	GLI3	0
GLI3_Hand2_second_motif.jpwm|GLI3_only_first_motif.jpwm|FR|81	1	100	0.59	0.766667	1.69492	0.534783	0.5928	1	GLI3_Hand2_second_motif	GLI3_only_first_motif	FR	81	GLI3	GLI3	0
GLI3_Hand2_second_motif.jpwm|GLI3_only_first_motif.jpwm|FR|87	2	100	0.62	0.82609	3.22581	1.67052	0.0948164	2	GLI3_Hand2_second_motif	GLI3_only_first_motif	FR	87	GLI3	GLI3	0
GLI3_Hand2_second_motif.jpwm|GLI3_only_first_motif.jpwm|FF|69	1	100	0.79	0.890976	1.26582	0.235697	0.813668	1	GLI3_Hand2_second_motif	GLI3_only_first_motif	FF	69	GLI3	GLI3	0
GLI3_Hand2_second_motif.jpwm|GLI3_only_first_motif.jpwm|FF|62	5	100	0.94	1.05237	5.31915	3.85797	0.000114332	5	GLI3_Hand2_second_motif	GLI3_only_first_motif	FF	62	GLI3	GLI3	0
GLI3_Hand2_second_motif.jpwm|GLI3_only_first_motif.jpwm|FF|61	1	100	0.87	0.895048	1.14943	0.145244	0.884519	1	GLI3_Hand2_second_motif	GLI3_only_first_motif	FF	61	GLI3	GLI3	0
GLI3_Hand2_second_motif.jpwm|GLI3_only_first_motif.jpwm|FF|66	1	100	0.7	0.858705	1.42857	0.349363	0.726816	1	GLI3_Hand2_second_motif	GLI3_only_first_motif	FF	66	GLI3	GLI3	0
GLI3_Hand2_second_motif.jpwm|GLI3_only_first_motif.jpwm|FF|64	1	100	0.7	0.797724	1.42857	0.37607	0.706865	1	GLI3_Hand2_second_motif	GLI3_only_first_motif	FF	64	GLI3	GLI3	0
GLI3_Hand2_second_motif.jpwm|GLI3_only_first_motif.jpwm|FF|65	1	100	0.74	0.88329	1.35135	0.294354	0.768487	1	GLI3_Hand2_second_motif	GLI3_only_first_motif	FF	65	GLI3	GLI3	0
GLI3_Hand2_second_motif.jpwm|GLI3_only_first_motif.jpwm|FR|75	2	100	0.53	0.70288	3.77358	2.0914	0.0364927	2	GLI3_Hand2_second_motif	GLI3_only_first_motif	FR	75	GLI3	GLI3	0
GLI3_Hand2_second_motif.jpwm|GLI3_only_first_motif.jpwm|FR|77	1	100	0.59	0.779731	1.69492	0.525823	0.599011	1	GLI3_Hand2_second_motif	GLI3_only_first_motif	FR	77	GLI3	GLI3	0
GLI3_Hand2_second_motif.jpwm|GLI3_only_first_motif.jpwm|FR|76	1	100	0.67	0.779212	1.49254	0.423505	0.671927	1	GLI3_Hand2_second_motif	GLI3_only_first_motif	FR	76	GLI3	GLI3	0
GLI3_Hand2_second_motif.jpwm|GLI3_only_first_motif.jpwm|FR|71	1	100	0.54	0.744271	1.85185	0.618054	0.536539	1	GLI3_Hand2_second_motif	GLI3_only_first_motif	FR	71	GLI3	GLI3	0
GLI3_Hand2_second_motif.jpwm|GLI3_only_first_motif.jpwm|FR|70	1	100	0.65	0.715979	1.53846	0.488841	0.624954	1	GLI3_Hand2_second_motif	GLI3_only_first_motif	FR	70	GLI3	GLI3	0
GLI3_Hand2_second_motif.jpwm|GLI3_only_first_motif.jpwm|FF|57	2	100	0.76	0.865967	2.63158	1.43193	0.152165	2	GLI3_Hand2_second_motif	GLI3_only_first_motif	FF	57	GLI3	GLI3	0
GLI3_Hand2_second_motif.jpwm|GLI3_only_first_motif.jpwm|FF|56	1	100	0.67	0.876805	1.49254	0.376366	0.706645	1	GLI3_Hand2_second_motif	GLI3_only_first_motif	FF	56	GLI3	GLI3	0
GLI3_Hand2_second_motif.jpwm|GLI3_only_first_motif.jpwm|FF|55	2	100	0.8	0.864566	2.5	1.38798	0.165143	2	GLI3_Hand2_second_motif	GLI3_only_first_motif	FF	55	GLI3	GLI3	0
GLI3_Hand2_second_motif.jpwm|GLI3_only_first_motif.jpwm|FF|53	3	100	1.02	0.974213	2.94118	2.03241	0.0421122	3	GLI3_Hand2_second_motif	GLI3_only_first_motif	FF	53	GLI3	GLI3	0
GLI3_Hand2_second_motif.jpwm|GLI3_only_first_motif.jpwm|FF|52	1	100	1.02	1.03455	0.980392	-0.019332	0.984576	1	GLI3_Hand2_second_motif	GLI3_only_first_motif	FF	52	GLI3	GLI3	0
GLI3_Hand2_second_motif.jpwm|GLI3_only_first_motif.jpwm|FF|51	1	100	0.9	0.893297	1.11111	0.111945	0.910867	1	GLI3_Hand2_second_motif	GLI3_only_first_motif	FF	51	GLI3	GLI3	0
GLI3_Hand2_second_motif.jpwm|GLI3_only_first_motif.jpwm|FF|50	2	100	0.97	1.04886	2.06186	0.982021	0.326089	2	GLI3_Hand2_second_motif	GLI3_only_first_motif	FF	50	GLI3	GLI3	0
GLI3_Hand2_second_motif.jpwm|GLI3_only_first_motif.jpwm|FF|59	1	100	0.75	0.833333	1.33333	0.3	0.764177	1	GLI3_Hand2_second_motif	GLI3_only_first_motif	FF	59	GLI3	GLI3	0
GLI3_Hand2_second_motif.jpwm|GLI3_only_first_motif.jpwm|FR|31	2	100	0.64	0.822904	3.125	1.65268	0.0983954	2	GLI3_Hand2_second_motif	GLI3_only_first_motif	FR	31	GLI3	GLI3	0
GLI3_Hand2_second_motif.jpwm|GLI3_only_first_motif.jpwm|FR|32	9	100	0.53	0.744746	16.9811	11.373	5.69902e-30	9	GLI3_Hand2_second_motif	GLI3_only_first_motif	FR	32	GLI3	GLI3	0
GLI3_Hand2_second_motif.jpwm|GLI3_only_first_motif.jpwm|FR|34	2	100	0.66	0.901402	3.0303	1.48657	0.137128	2	GLI3_Hand2_second_motif	GLI3_only_first_motif	FR	34	GLI3	GLI3	0
GLI3_Hand2_second_motif.jpwm|GLI3_only_first_motif.jpwm|FR|37	1	100	0.83	0.899551	1.20482	0.188983	0.850106	1	GLI3_Hand2_second_motif	GLI3_only_first_motif	FR	37	GLI3	GLI3	0
GLI3_Hand2_second_motif.jpwm|GLI3_only_first_motif.jpwm|FR|8	1	100	0.57	0.768772	1.75439	0.559334	0.575934	1	GLI3_Hand2_second_motif	GLI3_only_first_motif	FR	8	GLI3	GLI3	0
GLI3_Hand2_second_motif.jpwm|GLI3_only_first_motif.jpwm|FR|66	2	100	0.77	0.874498	2.5974	1.40652	0.15957	2	GLI3_Hand2_second_motif	GLI3_only_first_motif	FR	66	GLI3	GLI3	0
GLI3_Hand2_second_motif.jpwm|GLI3_only_first_motif.jpwm|FR|67	1	100	0.56	0.729189	1.78571	0.60341	0.546236	1	GLI3_Hand2_second_motif	GLI3_only_first_motif	FR	67	GLI3	GLI3	0
GLI3_Hand2_second_motif.jpwm|GLI3_only_first_motif.jpwm|FR|64	1	100	0.67	0.910711	1.49254	0.362354	0.717087	1	GLI3_Hand2_second_motif	GLI3_only_first_motif	FR	64	GLI3	GLI3	0
GLI3_Hand2_second_motif.jpwm|GLI3_only_first_motif.jpwm|FR|65	2	100	0.61	0.80271	3.27869	1.73163	0.0833388	2	GLI3_Hand2_second_motif	GLI3_only_first_motif	FR	65	GLI3	GLI3	0
GLI3_Hand2_second_motif.jpwm|GLI3_only_first_motif.jpwm|FR|63	1	100	0.62	0.735534	1.6129	0.516632	0.605413	1	GLI3_Hand2_second_motif	GLI3_only_first_motif	FR	63	GLI3	GLI3	0
GLI3_Hand2_second_motif.jpwm|GLI3_only_first_motif.jpwm|FR|60	3	100	0.53	0.717107	5.66038	3.4444	0.000572338	3	GLI3_Hand2_second_motif	GLI3_only_first_motif	FR	60	GLI3	GLI3	0
GLI3_Hand2_second_motif.jpwm|GLI3_only_first_motif.jpwm|FR|61	1	100	0.69	0.837203	1.44928	0.370281	0.711173	1	GLI3_Hand2_second_motif	GLI3_only_first_motif	FR	61	GLI3	GLI3	0
GLI3_Hand2_second_motif.jpwm|GLI3_only_first_motif.jpwm|FR|68	1	100	0.56	0.742913	1.78571	0.592263	0.553674	1	GLI3_Hand2_second_motif	GLI3_only_first_motif	FR	68	GLI3	GLI3	0
GLI3_Hand2_second_motif.jpwm|GLI3_only_first_motif.jpwm|FF|40	1	100	1.07	1.07548	0.934579	-0.065087	0.948105	1	GLI3_Hand2_second_motif	GLI3_only_first_motif	FF	40	GLI3	GLI3	0
GLI3_Hand2_second_motif.jpwm|GLI3_only_first_motif.jpwm|FF|41	1	100	0.92	0.917617	1.08696	0.0871824	0.930527	1	GLI3_Hand2_second_motif	GLI3_only_first_motif	FF	41	GLI3	GLI3	0
GLI3_Hand2_second_motif.jpwm|GLI3_only_first_motif.jpwm|FF|24	3	100	0.93	0.879107	3.22581	2.35466	0.0185395	3	GLI3_Hand2_second_motif	GLI3_only_first_motif	FF	24	GLI3	GLI3	0
GLI3_Hand2_second_motif.jpwm|GLI3_only_first_motif.jpwm|FR|93	1	100	0.66	0.781348	1.51515	0.435145	0.663457	1	GLI3_Hand2_second_motif	GLI3_only_first_motif	FR	93	GLI3	GLI3	0
GLI3_Hand2_second_motif.jpwm|GLI3_only_first_motif.jpwm|FF|45	1	100	0.79	0.782317	1.26582	0.268433	0.788366	1	GLI3_Hand2_second_motif	GLI3_only_first_motif	FF	45	GLI3	GLI3	0
GLI3_Hand2_second_motif.jpwm|GLI3_only_first_motif.jpwm|FF|46	2	100	0.78	0.823641	2.5641	1.48123	0.138546	2	GLI3_Hand2_second_motif	GLI3_only_first_motif	FF	46	GLI3	GLI3	0
GLI3_Hand2_second_motif.jpwm|GLI3_only_first_motif.jpwm|FF|47	1	100	0.85	0.988571	1.17647	0.151734	0.879397	1	GLI3_Hand2_second_motif	GLI3_only_first_motif	FF	47	GLI3	GLI3	0
GLI3_Hand2_second_motif.jpwm|GLI3_only_first_motif.jpwm|FF|48	4	100	0.8	0.887625	5	3.60512	0.000312003	4	GLI3_Hand2_second_motif	GLI3_only_first_motif	FF	48	GLI3	GLI3	0
GLI3_Hand2_second_motif.jpwm|GLI3_only_first_motif.jpwm|FF|49	1	100	0.78	0.859645	1.28205	0.25592	0.798013	1	GLI3_Hand2_second_motif	GLI3_only_first_motif	FF	49	GLI3	GLI3	0
GLI3_Hand2_second_motif.jpwm|GLI3_only_first_motif.jpwm|FR|91	1	100	0.55	0.808728	1.81818	0.55643	0.577917	1	GLI3_Hand2_second_motif	GLI3_only_first_motif	FR	91	GLI3	GLI3	0
GLI3_Hand2_second_motif.jpwm|GLI3_only_first_motif.jpwm|FR|1	2	100	0.71	0.924362	2.8169	1.39556	0.162848	2	GLI3_Hand2_second_motif	GLI3_only_first_motif	FR	1	GLI3	GLI3	0
GLI3_Hand2_second_motif.jpwm|GLI3_only_first_motif.jpwm|FR|52	2	100	0.66	0.806789	3.0303	1.6609	0.0967327	2	GLI3_Hand2_second_motif	GLI3_only_first_motif	FR	52	GLI3	GLI3	0
GLI3_Hand2_second_motif.jpwm|GLI3_only_first_motif.jpwm|FR|50	4	100	0.68	0.763829	5.88235	4.34652	1.38312e-05	4	GLI3_Hand2_second_motif	GLI3_only_first_motif	FR	50	GLI3	GLI3	0
GLI3_Hand2_second_motif.jpwm|GLI3_only_first_motif.jpwm|FR|57	2	100	0.56	0.729189	3.57143	1.9748	0.0482913	2	GLI3_Hand2_second_motif	GLI3_only_first_motif	FR	57	GLI3	GLI3	0
GLI3_Hand2_second_motif.jpwm|GLI3_only_first_motif.jpwm|FR|56	2	100	0.5	0.771984	4	1.94304	0.0520107	2	GLI3_Hand2_second_motif	GLI3_only_first_motif	FR	56	GLI3	GLI3	0
GLI3_Hand2_second_motif.jpwm|GLI3_only_first_motif.jpwm|FR|59	2	100	0.73	0.86287	2.73973	1.47183	0.141066	2	GLI3_Hand2_second_motif	GLI3_only_first_motif	FR	59	GLI3	GLI3	0
GLI3_Hand2_second_motif.jpwm|GLI3_only_first_motif.jpwm|FF|99	2	100	0.71	0.807728	2.8169	1.59707	0.11025	2	GLI3_Hand2_second_motif	GLI3_only_first_motif	FF	99	GLI3	GLI3	0
GLI3_Hand2_second_motif.jpwm|GLI3_only_first_motif.jpwm|FF|92	2	100	0.76	0.88899	2.63158	1.39484	0.163064	2	GLI3_Hand2_second_motif	GLI3_only_first_motif	FF	92	GLI3	GLI3	0
GLI3_Hand2_second_motif.jpwm|GLI3_only_first_motif.jpwm|FF|91	2	100	0.67	0.817177	2.98507	1.62755	0.103619	2	GLI3_Hand2_second_motif	GLI3_only_first_motif	FF	91	GLI3	GLI3	0
GLI3_Hand2_second_motif.jpwm|GLI3_only_first_motif.jpwm|FF|95	2	100	0.68	0.827312	2.94118	1.59553	0.110594	2	GLI3_Hand2_second_motif	GLI3_only_first_motif	FF	95	GLI3	GLI3	0
GLI3_Hand2_second_motif.jpwm|GLI3_only_first_motif.jpwm|FR|54	1	100	0.48	0.703239	2.08333	0.739435	0.459643	1	GLI3_Hand2_second_motif	GLI3_only_first_motif	FR	54	GLI3	GLI3	0
GLI3_Hand2_second_motif.jpwm|GLI3_only_first_motif.jpwm|FF|31	1	100	0.96	0.920255	1.04167	0.0434662	0.96533	1	GLI3_Hand2_second_motif	GLI3_only_first_motif	FF	31	GLI3	GLI3	0
GLI3_Hand2_second_motif.jpwm|GLI3_only_first_motif.jpwm|FF|26	1	100	0.84	0.939804	1.19048	0.170248	0.864815	1	GLI3_Hand2_second_motif	GLI3_only_first_motif	FF	26	GLI3	GLI3	0
GLI3_Hand2_second_motif.jpwm|GLI3_only_first_motif.jpwm|FR|48	3	100	0.65	0.74366	4.61538	3.16005	0.00157744	3	GLI3_Hand2_second_motif	GLI3_only_first_motif	FR	48	GLI3	GLI3	0
GLI3_Hand2_second_motif.jpwm|GLI3_only_first_motif.jpwm|FR|49	1	100	0.75	0.925235	1.33333	0.270201	0.787005	1	GLI3_Hand2_second_motif	GLI3_only_first_motif	FR	49	GLI3	GLI3	0
GLI3_Hand2_second_motif.jpwm|GLI3_only_first_motif.jpwm|FF|27	1	100	0.71	0.844411	1.40845	0.343435	0.731272	1	GLI3_Hand2_second_motif	GLI3_only_first_motif	FF	27	GLI3	GLI3	0
GLI3_Hand2_second_motif.jpwm|GLI3_only_first_motif.jpwm|FR|44	1	100	0.76	1.02612	1.31579	0.23389	0.81507	1	GLI3_Hand2_second_motif	GLI3_only_first_motif	FR	44	GLI3	GLI3	0
GLI3_Hand2_second_motif.jpwm|GLI3_only_first_motif.jpwm|FR|47	1	100	0.49	0.658971	2.04082	0.773934	0.43897	1	GLI3_Hand2_second_motif	GLI3_only_first_motif	FR	47	GLI3	GLI3	0
GLI3_Hand2_second_motif.jpwm|GLI3_only_first_motif.jpwm|FR|41	1	100	0.68	0.85138	1.47059	0.37586	0.707021	1	GLI3_Hand2_second_motif	GLI3_only_first_motif	FR	41	GLI3	GLI3	0
GLI3_Hand2_second_motif.jpwm|GLI3_only_first_motif.jpwm|FR|42	1	100	0.59	0.877266	1.69492	0.467361	0.640242	1	GLI3_Hand2_second_motif	GLI3_only_first_motif	FR	42	GLI3	GLI3	0
GLI3_Hand2_second_motif.jpwm|GLI3_only_first_motif.jpwm|FR|43	1	100	0.71	0.832363	1.40845	0.348406	0.727536	1	GLI3_Hand2_second_motif	GLI3_only_first_motif	FR	43	GLI3	GLI3	0
GLI3_Hand2_second_motif.jpwm|GLI3_only_first_motif.jpwm|FF|22	2	100	0.8	0.828775	2.5	1.44792	0.14764	2	GLI3_Hand2_second_motif	GLI3_only_first_motif	FF	22	GLI3	GLI3	0
GLI3_Hand2_second_motif.jpwm|GLI3_only_first_motif.jpwm|FF|23	1	100	0.91	0.9	1.0989	0.1	0.920344	1	GLI3_Hand2_second_motif	GLI3_only_first_motif	FF	23	GLI3	GLI3	0
GLI3_Hand2_second_motif.jpwm|GLI3_only_first_motif.jpwm|FF|20	1	100	0.88	0.977319	1.13636	0.122785	0.902277	1	GLI3_Hand2_second_motif	GLI3_only_first_motif	FF	20	GLI3	GLI3	0
GLI3_Hand2_second_motif.jpwm|GLI3_only_first_motif.jpwm|FF|21	2	100	0.87	0.906263	2.29885	1.24688	0.212442	2	GLI3_Hand2_second_motif	GLI3_only_first_motif	FF	21	GLI3	GLI3	0
GLI3_Hand2_second_motif.jpwm|GLI3_only_first_motif.jpwm|RF|-2	1	100	0.33	0.493493	3.0303	1.35767	0.174569	1	GLI3_Hand2_second_motif	GLI3_only_first_motif	RF	-2	GLI3	GLI3	0
GLI3_Hand2_second_motif.jpwm|GLI3_only_first_motif.jpwm|RF|-1	2	100	1.62	1.27747	1.23457	0.297464	0.766112	2	GLI3_Hand2_second_motif	GLI3_only_first_motif	RF	-1	GLI3	GLI3	0
GLI3_Hand2_second_motif.jpwm|GLI3_only_first_motif.jpwm|FF|86	1	100	0.5	0.703526	2	0.710705	0.477267	1	GLI3_Hand2_second_motif	GLI3_only_first_motif	FF	86	GLI3	GLI3	0
GLI3_Hand2_second_motif.jpwm|GLI3_only_first_motif.jpwm|FF|87	5	100	1.01	0.948098	4.9505	4.20843	2.57154e-05	5	GLI3_Hand2_second_motif	GLI3_only_first_motif	FF	87	GLI3	GLI3	0
GLI3_Hand2_second_motif.jpwm|GLI3_only_first_motif.jpwm|FF|81	1	100	0.77	0.897302	1.2987	0.256324	0.797701	1	GLI3_Hand2_second_motif	GLI3_only_first_motif	FF	81	GLI3	GLI3	0
GLI3_Hand2_second_motif.jpwm|GLI3_only_first_motif.jpwm|FF|82	2	100	0.57	0.685418	3.50877	2.08632	0.0369498	2	GLI3_Hand2_second_motif	GLI3_only_first_motif	FF	82	GLI3	GLI3	0
GLI3_Hand2_second_motif.jpwm|GLI3_only_first_motif.jpwm|FF|90	2	100	0.84	0.939804	2.38095	1.2343	0.217091	2	GLI3_Hand2_second_motif	GLI3_only_first_motif	FF	90	GLI3	GLI3	0
GLI3_Hand2_second_motif.jpwm|GLI3_only_first_motif.jpwm|FF|97	1	100	0.65	0.946818	1.53846	0.369659	0.711636	1	GLI3_Hand2_second_motif	GLI3_only_first_motif	FF	97	GLI3	GLI3	0
GLI3_Hand2_second_motif.jpwm|GLI3_only_first_motif.jpwm|FF|94	2	100	0.76	0.842315	2.63158	1.47213	0.140985	2	GLI3_Hand2_second_motif	GLI3_only_first_motif	FF	94	GLI3	GLI3	0
GLI3_Hand2_second_motif.jpwm|GLI3_only_first_motif.jpwm|FR|39	1	100	0.65	0.833333	1.53846	0.42	0.674485	1	GLI3_Hand2_second_motif	GLI3_only_first_motif	FR	39	GLI3	GLI3	0
GLI3_Hand2_second_motif.jpwm|GLI3_only_first_motif.jpwm|FR|30	2	100	0.63	0.705748	3.1746	1.9412	0.0522338	2	GLI3_Hand2_second_motif	GLI3_only_first_motif	FR	30	GLI3	GLI3	0
GLI3_Hand2_second_motif.jpwm|GLI3_only_first_motif.jpwm|FR|35	4	100	0.68	0.736906	5.88235	4.50532	6.62717e-06	4	GLI3_Hand2_second_motif	GLI3_only_first_motif	FR	35	GLI3	GLI3	0
GLI3_Hand2_second_motif.jpwm|GLI3_only_first_motif.jpwm|FR|36	1	100	0.73	0.897302	1.36986	0.300902	0.763489	1	GLI3_Hand2_second_motif	GLI3_only_first_motif	FR	36	GLI3	GLI3	0
GLI3_Hand2_second_motif.jpwm|GLI3_only_first_motif.jpwm|FF|-3	5	100	0.44	0.624742	11.3636	7.29901	2.89896e-13	5	GLI3_Hand2_second_motif	GLI3_only_first_motif	FF	-3	GLI3	GLI3	0
GLI3_Hand2_second_motif.jpwm|GLI3_only_first_motif.jpwm|FF|-2	1	100	1.48	1.21006	0.675676	-0.396675	0.691607	1	GLI3_Hand2_second_motif	GLI3_only_first_motif	FF	-2	GLI3	GLI3	0
GLI3_Hand2_second_motif.jpwm|GLI3_only_first_motif.jpwm|FF|-1	2	100	1.2	1.08246	1.66667	0.739058	0.459872	2	GLI3_Hand2_second_motif	GLI3_only_first_motif	FF	-1	GLI3	GLI3	0
GLI3_Hand2_third_motif.jpwm|GLI3_only_first_motif.jpwm|FR|1	2	100	0.23	0.468287	8.69565	3.77973	0.000156998	2	GLI3_Hand2_third_motif	GLI3_only_first_motif	FR	1	GLI3	GLI3	0
GLI3_Hand2_third_motif.jpwm|GLI3_only_first_motif.jpwm|FR|3	4	100	0.25	0.609272	16	6.15489	7.51303e-10	4	GLI3_Hand2_third_motif	GLI3_only_first_motif	FR	3	GLI3	GLI3	0
GLI3_Hand2_third_motif.jpwm|GLI3_only_first_motif.jpwm|FR|5	1	100	0.27	0.468287	3.7037	1.55887	0.119027	1	GLI3_Hand2_third_motif	GLI3_only_first_motif	FR	5	GLI3	GLI3	0
GLI3_Hand2_third_motif.jpwm|GLI3_only_first_motif.jpwm|FR|7	1	100	0.36	0.559942	2.77778	1.14297	0.253049	1	GLI3_Hand2_third_motif	GLI3_only_first_motif	FR	7	GLI3	GLI3	0
GLI3_Hand2_third_motif.jpwm|GLI3_only_first_motif.jpwm|FR|6	1	100	0.27	0.547815	3.7037	1.33257	0.182674	1	GLI3_Hand2_third_motif	GLI3_only_first_motif	FR	6	GLI3	GLI3	0
GLI3_Hand2_third_motif.jpwm|GLI3_only_first_motif.jpwm|FR|9	2	100	0.28	0.569955	7.14286	3.01778	0.00254631	2	GLI3_Hand2_third_motif	GLI3_only_first_motif	FR	9	GLI3	GLI3	0
GLI3_Hand2_third_motif.jpwm|GLI3_only_first_motif.jpwm|FR|8	4	100	0.23	0.529055	17.3913	7.12592	1.03391e-12	4	GLI3_Hand2_third_motif	GLI3_only_first_motif	FR	8	GLI3	GLI3	0
GLI3_Hand2_third_motif.jpwm|GLI3_only_first_motif.jpwm|FR|68	1	100	0.24	0.514831	4.16667	1.47621	0.139886	1	GLI3_Hand2_third_motif	GLI3_only_first_motif	FR	68	GLI3	GLI3	0
GLI3_Hand2_third_motif.jpwm|GLI3_only_first_motif.jpwm|FR|69	2	100	0.2	0.512471	10	3.5124	0.000444086	2	GLI3_Hand2_third_motif	GLI3_only_first_motif	FR	69	GLI3	GLI3	0
GLI3_Hand2_third_motif.jpwm|GLI3_only_first_motif.jpwm|FR|60	1	100	0.29	0.591096	3.44828	1.20116	0.229689	1	GLI3_Hand2_third_motif	GLI3_only_first_motif	FR	60	GLI3	GLI3	0
GLI3_Hand2_third_motif.jpwm|GLI3_only_first_motif.jpwm|FR|62	1	100	0.31	0.525991	3.22581	1.31181	0.189585	1	GLI3_Hand2_third_motif	GLI3_only_first_motif	FR	62	GLI3	GLI3	0
GLI3_Hand2_third_motif.jpwm|GLI3_only_first_motif.jpwm|FR|64	1	100	0.15	0.385992	6.66667	2.20212	0.027657	1	GLI3_Hand2_third_motif	GLI3_only_first_motif	FR	64	GLI3	GLI3	0
GLI3_Hand2_third_motif.jpwm|GLI3_only_first_motif.jpwm|FR|66	2	100	0.21	0.477684	9.52381	3.74725	0.000178785	2	GLI3_Hand2_third_motif	GLI3_only_first_motif	FR	66	GLI3	GLI3	0
GLI3_Hand2_third_motif.jpwm|GLI3_only_first_motif.jpwm|FF|12	1	100	0.18	0.519907	5.55556	1.57721	0.114748	1	GLI3_Hand2_third_motif	GLI3_only_first_motif	FF	12	GLI3	GLI3	0
GLI3_Hand2_third_motif.jpwm|GLI3_only_first_motif.jpwm|RF|49	1	100	0.22	0.561024	4.54545	1.39032	0.164433	1	GLI3_Hand2_third_motif	GLI3_only_first_motif	RF	49	GLI3	GLI3	0
GLI3_Hand2_third_motif.jpwm|GLI3_only_first_motif.jpwm|RF|47	3	100	0.31	0.56309	9.67742	4.77721	1.77745e-06	3	GLI3_Hand2_third_motif	GLI3_only_first_motif	RF	47	GLI3	GLI3	0
GLI3_Hand2_third_motif.jpwm|GLI3_only_first_motif.jpwm|RF|42	1	100	0.25	0.51981	4	1.44284	0.149067	1	GLI3_Hand2_third_motif	GLI3_only_first_motif	RF	42	GLI3	GLI3	0
GLI3_Hand2_third_motif.jpwm|GLI3_only_first_motif.jpwm|RF|43	3	100	0.3	0.559581	10	4.82504	1.39978e-06	3	GLI3_Hand2_third_motif	GLI3_only_first_motif	RF	43	GLI3	GLI3	0
GLI3_Hand2_third_motif.jpwm|GLI3_only_first_motif.jpwm|RF|41	1	100	0.24	0.473969	4.16667	1.60348	0.108829	1	GLI3_Hand2_third_motif	GLI3_only_first_motif	RF	41	GLI3	GLI3	0
GLI3_Hand2_third_motif.jpwm|GLI3_only_first_motif.jpwm|FF|54	2	100	0.1	0.333333	20	5.7	1.19807e-08	2	GLI3_Hand2_third_motif	GLI3_only_first_motif	FF	54	GLI3	GLI3	0
GLI3_Hand2_third_motif.jpwm|GLI3_only_first_motif.jpwm|FR|79	1	100	0.29	0.591096	3.44828	1.20116	0.229689	1	GLI3_Hand2_third_motif	GLI3_only_first_motif	FR	79	GLI3	GLI3	0
GLI3_Hand2_third_motif.jpwm|GLI3_only_first_motif.jpwm|FR|73	1	100	0.26	0.561743	3.84615	1.31733	0.187729	1	GLI3_Hand2_third_motif	GLI3_only_first_motif	FR	73	GLI3	GLI3	0
GLI3_Hand2_third_motif.jpwm|GLI3_only_first_motif.jpwm|FR|72	1	100	0.29	0.555869	3.44828	1.27728	0.201503	1	GLI3_Hand2_third_motif	GLI3_only_first_motif	FR	72	GLI3	GLI3	0
GLI3_Hand2_third_motif.jpwm|GLI3_only_first_motif.jpwm|FR|71	2	100	0.15	0.35887	13.3333	5.15507	2.53542e-07	2	GLI3_Hand2_third_motif	GLI3_only_first_motif	FR	71	GLI3	GLI3	0
GLI3_Hand2_third_motif.jpwm|GLI3_only_first_motif.jpwm|FR|74	1	100	0.24	0.452155	4.16667	1.68084	0.0927943	1	GLI3_Hand2_third_motif	GLI3_only_first_motif	FR	74	GLI3	GLI3	0
GLI3_Hand2_third_motif.jpwm|GLI3_only_first_motif.jpwm|FF|5	1	100	0.23	0.422953	4.34783	1.82054	0.0686776	1	GLI3_Hand2_third_motif	GLI3_only_first_motif	FF	5	GLI3	GLI3	0
GLI3_Hand2_third_motif.jpwm|GLI3_only_first_motif.jpwm|FF|7	1	100	0.15	0.411329	6.66667	2.06647	0.0387841	1	GLI3_Hand2_third_motif	GLI3_only_first_motif	FF	7	GLI3	GLI3	0
GLI3_Hand2_third_motif.jpwm|GLI3_only_first_motif.jpwm|FF|0	2	100	0.19	0.394277	10.5263	4.59068	4.41808e-06	2	GLI3_Hand2_third_motif	GLI3_only_first_motif	FF	0	GLI3	GLI3	0
GLI3_Hand2_third_motif.jpwm|GLI3_only_first_motif.jpwm|FF|9	1	100	0.18	0.386123	5.55556	2.12368	0.0336972	1	GLI3_Hand2_third_motif	GLI3_only_first_motif	FF	9	GLI3	GLI3	0
GLI3_Hand2_third_motif.jpwm|GLI3_only_first_motif.jpwm|RF|50	1	100	0.28	0.494004	3.57143	1.45748	0.144985	1	GLI3_Hand2_third_motif	GLI3_only_first_motif	RF	50	GLI3	GLI3	0
GLI3_Hand2_third_motif.jpwm|GLI3_only_first_motif.jpwm|RF|55	2	100	0.18	0.386123	11.1111	4.71352	2.43468e-06	2	GLI3_Hand2_third_motif	GLI3_only_first_motif	RF	55	GLI3	GLI3	0
GLI3_Hand2_third_motif.jpwm|GLI3_only_first_motif.jpwm|RF|54	2	100	0.23	0.489382	8.69565	3.6168	0.000298262	2	GLI3_Hand2_third_motif	GLI3_only_first_motif	RF	54	GLI3	GLI3	0
GLI3_Hand2_third_motif.jpwm|GLI3_only_first_motif.jpwm|RF|57	1	100	0.21	0.433333	4.7619	1.82308	0.0682917	1	GLI3_Hand2_third_motif	GLI3_only_first_motif	RF	57	GLI3	GLI3	0
GLI3_Hand2_third_motif.jpwm|GLI3_only_first_motif.jpwm|RF|56	4	100	0.2	0.512471	20	7.41506	1.21572e-13	4	GLI3_Hand2_third_motif	GLI3_only_first_motif	RF	56	GLI3	GLI3	0
GLI3_Hand2_third_motif.jpwm|GLI3_only_first_motif.jpwm|FF|28	1	100	0.29	0.607944	3.44828	1.16787	0.242859	1	GLI3_Hand2_third_motif	GLI3_only_first_motif	FF	28	GLI3	GLI3	0
GLI3_Hand2_third_motif.jpwm|GLI3_only_first_motif.jpwm|FF|29	2	100	0.14	0.348735	14.2857	5.33356	9.6305e-08	2	GLI3_Hand2_third_motif	GLI3_only_first_motif	FF	29	GLI3	GLI3	0
GLI3_Hand2_third_motif.jpwm|GLI3_only_first_motif.jpwm|FR|46	1	100	0.2	0.449467	5	1.77989	0.0750944	1	GLI3_Hand2_third_motif	GLI3_only_first_motif	FR	46	GLI3	GLI3	0
GLI3_Hand2_third_motif.jpwm|GLI3_only_first_motif.jpwm|FR|44	1	100	0.25	0.479372	4	1.56455	0.11769	1	GLI3_Hand2_third_motif	GLI3_only_first_motif	FR	44	GLI3	GLI3	0
GLI3_Hand2_third_motif.jpwm|GLI3_only_first_motif.jpwm|FR|42	2	100	0.2	0.426401	10	4.22137	2.42817e-05	2	GLI3_Hand2_third_motif	GLI3_only_first_motif	FR	42	GLI3	GLI3	0
GLI3_Hand2_third_motif.jpwm|GLI3_only_first_motif.jpwm|FR|41	1	100	0.23	0.446196	4.34783	1.7257	0.0844016	1	GLI3_Hand2_third_motif	GLI3_only_first_motif	FR	41	GLI3	GLI3	0
GLI3_Hand2_third_motif.jpwm|GLI3_only_first_motif.jpwm|FR|49	1	100	0.21	0.53739	4.7619	1.47007	0.141543	1	GLI3_Hand2_third_motif	GLI3_only_first_motif	FR	49	GLI3	GLI3	0
GLI3_Hand2_third_motif.jpwm|GLI3_only_first_motif.jpwm|FF|39	1	100	0.17	0.377525	5.88235	2.19853	0.0279114	1	GLI3_Hand2_third_motif	GLI3_only_first_motif	FF	39	GLI3	GLI3	0
GLI3_Hand2_third_motif.jpwm|GLI3_only_first_motif.jpwm|FF|38	1	100	0.18	0.43531	5.55556	1.88371	0.0596036	1	GLI3_Hand2_third_motif	GLI3_only_first_motif	FF	38	GLI3	GLI3	0
GLI3_Hand2_third_motif.jpwm|GLI3_only_first_motif.jpwm|FF|31	1	100	0.2	0.471405	5	1.69706	0.089686	1	GLI3_Hand2_third_motif	GLI3_only_first_motif	FF	31	GLI3	GLI3	0
GLI3_Hand2_third_motif.jpwm|GLI3_only_first_motif.jpwm|FF|30	1	100	0.2	0.449467	5	1.77989	0.0750944	1	GLI3_Hand2_third_motif	GLI3_only_first_motif	FF	30	GLI3	GLI3	0
GLI3_Hand2_third_motif.jpwm|GLI3_only_first_motif.jpwm|FF|36	1	100	0.12	0.326599	8.33333	2.69444	0.00705073	1	GLI3_Hand2_third_motif	GLI3_only_first_motif	FF	36	GLI3	GLI3	0
GLI3_Hand2_third_motif.jpwm|GLI3_only_first_motif.jpwm|FF|34	5	100	0.11	0.345096	45.4545	14.17	1.4052e-45	5	GLI3_Hand2_third_motif	GLI3_only_first_motif	FF	34	GLI3	GLI3	0
GLI3_Hand2_third_motif.jpwm|GLI3_only_first_motif.jpwm|FR|50	1	100	0.26	0.484507	3.84615	1.52732	0.12668	1	GLI3_Hand2_third_motif	GLI3_only_first_motif	FR	50	GLI3	GLI3	0
GLI3_Hand2_third_motif.jpwm|GLI3_only_first_motif.jpwm|FR|53	1	100	0.26	0.484507	3.84615	1.52732	0.12668	1	GLI3_Hand2_third_motif	GLI3_only_first_motif	FR	53	GLI3	GLI3	0
GLI3_Hand2_third_motif.jpwm|GLI3_only_first_motif.jpwm|FR|52	1	100	0.34	0.623123	2.94118	1.05918	0.289518	1	GLI3_Hand2_third_motif	GLI3_only_first_motif	FR	52	GLI3	GLI3	0
GLI3_Hand2_third_motif.jpwm|GLI3_only_first_motif.jpwm|FR|55	1	100	0.33	0.55149	3.0303	1.21489	0.224408	1	GLI3_Hand2_third_motif	GLI3_only_first_motif	FR	55	GLI3	GLI3	0
GLI3_Hand2_third_motif.jpwm|GLI3_only_first_motif.jpwm|FR|54	1	100	0.26	0.543464	3.84615	1.36163	0.173313	1	GLI3_Hand2_third_motif	GLI3_only_first_motif	FR	54	GLI3	GLI3	0
GLI3_Hand2_third_motif.jpwm|GLI3_only_first_motif.jpwm|FR|57	1	100	0.29	0.53739	3.44828	1.3212	0.186434	1	GLI3_Hand2_third_motif	GLI3_only_first_motif	FR	57	GLI3	GLI3	0
GLI3_Hand2_third_motif.jpwm|GLI3_only_first_motif.jpwm|FF|80	1	100	0.25	0.538891	4	1.39175	0.163999	1	GLI3_Hand2_third_motif	GLI3_only_first_motif	FF	80	GLI3	GLI3	0
GLI3_Hand2_third_motif.jpwm|GLI3_only_first_motif.jpwm|RF|100	1	100	0.19	0.394277	5.26316	2.05439	0.0399378	1	GLI3_Hand2_third_motif	GLI3_only_first_motif	RF	100	GLI3	GLI3	0
GLI3_Hand2_third_motif.jpwm|GLI3_only_first_motif.jpwm|FR|89	1	100	0.2	0.492366	5	1.62481	0.104204	1	GLI3_Hand2_third_motif	GLI3_only_first_motif	FR	89	GLI3	GLI3	0
GLI3_Hand2_third_motif.jpwm|GLI3_only_first_motif.jpwm|FR|83	1	100	0.27	0.446196	3.7037	1.63605	0.101829	1	GLI3_Hand2_third_motif	GLI3_only_first_motif	FR	83	GLI3	GLI3	0
GLI3_Hand2_third_motif.jpwm|GLI3_only_first_motif.jpwm|FR|80	1	100	0.12	0.326599	8.33333	2.69444	0.00705073	1	GLI3_Hand2_third_motif	GLI3_only_first_motif	FR	80	GLI3	GLI3	0
GLI3_Hand2_third_motif.jpwm|GLI3_only_first_motif.jpwm|FR|86	2	100	0.26	0.484507	7.69231	3.59128	0.000329063	2	GLI3_Hand2_third_motif	GLI3_only_first_motif	FR	86	GLI3	GLI3	0
GLI3_Hand2_third_motif.jpwm|GLI3_only_first_motif.jpwm|FR|84	1	100	0.22	0.483673	4.54545	1.61266	0.106818	1	GLI3_Hand2_third_motif	GLI3_only_first_motif	FR	84	GLI3	GLI3	0
GLI3_Hand2_third_motif.jpwm|GLI3_only_first_motif.jpwm|RF|82	1	100	0.32	0.583961	3.125	1.16446	0.244237	1	GLI3_Hand2_third_motif	GLI3_only_first_motif	RF	82	GLI3	GLI3	0
GLI3_Hand2_third_motif.jpwm|GLI3_only_first_motif.jpwm|RF|83	1	100	0.17	0.450701	5.88235	1.84158	0.0655372	1	GLI3_Hand2_third_motif	GLI3_only_first_motif	RF	83	GLI3	GLI3	0
GLI3_Hand2_third_motif.jpwm|GLI3_only_first_motif.jpwm|RF|86	1	100	0.09	0.320826	11.1111	2.83643	0.00456211	1	GLI3_Hand2_third_motif	GLI3_only_first_motif	RF	86	GLI3	GLI3	0
GLI3_Hand2_third_motif.jpwm|GLI3_only_first_motif.jpwm|RF|88	1	100	0.29	0.498381	3.44828	1.42461	0.154269	1	GLI3_Hand2_third_motif	GLI3_only_first_motif	RF	88	GLI3	GLI3	0
GLI3_Hand2_third_motif.jpwm|GLI3_only_first_motif.jpwm|FF|10	1	100	0.15	0.385992	6.66667	2.20212	0.027657	1	GLI3_Hand2_third_motif	GLI3_only_first_motif	FF	10	GLI3	GLI3	0
GLI3_Hand2_third_motif.jpwm|GLI3_only_first_motif.jpwm|FF|13	2	100	0.2	0.426401	10	4.22137	2.42817e-05	2	GLI3_Hand2_third_motif	GLI3_only_first_motif	FF	13	GLI3	GLI3	0
GLI3_Hand2_third_motif.jpwm|GLI3_only_first_motif.jpwm|FF|14	1	100	0.22	0.439927	4.54545	1.77302	0.0762248	1	GLI3_Hand2_third_motif	GLI3_only_first_motif	FF	14	GLI3	GLI3	0
GLI3_Hand2_third_motif.jpwm|GLI3_only_first_motif.jpwm|FF|16	1	100	0.14	0.348735	7.14286	2.46606	0.013661	1	GLI3_Hand2_third_motif	GLI3_only_first_motif	FF	16	GLI3	GLI3	0
GLI3_Hand2_third_motif.jpwm|GLI3_only_first_motif.jpwm|FR|95	1	100	0.19	0.394277	5.26316	2.05439	0.0399378	1	GLI3_Hand2_third_motif	GLI3_only_first_motif	FR	95	GLI3	GLI3	0
GLI3_Hand2_third_motif.jpwm|GLI3_only_first_motif.jpwm|FR|91	2	100	0.27	0.649086	7.40741	2.66528	0.00769232	2	GLI3_Hand2_third_motif	GLI3_only_first_motif	FR	91	GLI3	GLI3	0
GLI3_Hand2_third_motif.jpwm|GLI3_only_first_motif.jpwm|FR|92	1	100	0.18	0.411452	5.55556	1.99294	0.0462679	1	GLI3_Hand2_third_motif	GLI3_only_first_motif	FR	92	GLI3	GLI3	0
GLI3_Hand2_third_motif.jpwm|GLI3_only_first_motif.jpwm|FR|99	1	100	0.22	0.504124	4.54545	1.54724	0.121806	1	GLI3_Hand2_third_motif	GLI3_only_first_motif	FR	99	GLI3	GLI3	0
GLI3_Hand2_third_motif.jpwm|GLI3_only_first_motif.jpwm|FR|98	1	100	0.22	0.523778	4.54545	1.48918	0.13644	1	GLI3_Hand2_third_motif	GLI3_only_first_motif	FR	98	GLI3	GLI3	0
GLI3_Hand2_third_motif.jpwm|GLI3_only_first_motif.jpwm|RF|99	2	100	0.2	0.402015	10	4.47744	7.55422e-06	2	GLI3_Hand2_third_motif	GLI3_only_first_motif	RF	99	GLI3	GLI3	0
GLI3_Hand2_third_motif.jpwm|GLI3_only_first_motif.jpwm|RF|95	1	100	0.13	0.337998	7.69231	2.57398	0.0100535	1	GLI3_Hand2_third_motif	GLI3_only_first_motif	RF	95	GLI3	GLI3	0
GLI3_Hand2_third_motif.jpwm|GLI3_only_first_motif.jpwm|RF|91	2	100	0.21	0.477684	9.52381	3.74725	0.000178785	2	GLI3_Hand2_third_motif	GLI3_only_first_motif	RF	91	GLI3	GLI3	0
GLI3_Hand2_third_motif.jpwm|GLI3_only_first_motif.jpwm|RF|92	1	100	0.26	0.484507	3.84615	1.52732	0.12668	1	GLI3_Hand2_third_motif	GLI3_only_first_motif	RF	92	GLI3	GLI3	0
GLI3_Hand2_third_motif.jpwm|GLI3_only_first_motif.jpwm|FR|25	1	100	0.28	0.514045	3.57143	1.40066	0.161317	1	GLI3_Hand2_third_motif	GLI3_only_first_motif	FR	25	GLI3	GLI3	0
GLI3_Hand2_third_motif.jpwm|GLI3_only_first_motif.jpwm|RF|1	3	100	0.3	0.502519	10	5.37293	7.74665e-08	3	GLI3_Hand2_third_motif	GLI3_only_first_motif	RF	1	GLI3	GLI3	0
GLI3_Hand2_third_motif.jpwm|GLI3_only_first_motif.jpwm|RF|0	3	100	0.5	0.717741	6	3.48315	0.000495546	3	GLI3_Hand2_third_motif	GLI3_only_first_motif	RF	0	GLI3	GLI3	0
GLI3_Hand2_third_motif.jpwm|GLI3_only_first_motif.jpwm|RF|3	3	100	0.3	0.481999	10	5.60167	2.12298e-08	3	GLI3_Hand2_third_motif	GLI3_only_first_motif	RF	3	GLI3	GLI3	0
GLI3_Hand2_third_motif.jpwm|GLI3_only_first_motif.jpwm|RF|5	1	100	0.22	0.523778	4.54545	1.48918	0.13644	1	GLI3_Hand2_third_motif	GLI3_only_first_motif	RF	5	GLI3	GLI3	0
GLI3_Hand2_third_motif.jpwm|GLI3_only_first_motif.jpwm|FF|71	1	100	0.17	0.377525	5.88235	2.19853	0.0279114	1	GLI3_Hand2_third_motif	GLI3_only_first_motif	FF	71	GLI3	GLI3	0
GLI3_Hand2_third_motif.jpwm|GLI3_only_first_motif.jpwm|FR|-3	3	100	0.88	0.902074	3.40909	2.35014	0.0187664	3	GLI3_Hand2_third_motif	GLI3_only_first_motif	FR	-3	GLI3	GLI3	0
GLI3_Hand2_third_motif.jpwm|GLI3_only_first_motif.jpwm|FR|-2	1	100	0.18	0.411452	5.55556	1.99294	0.0462679	1	GLI3_Hand2_third_motif	GLI3_only_first_motif	FR	-2	GLI3	GLI3	0
GLI3_Hand2_third_motif.jpwm|GLI3_only_first_motif.jpwm|FR|-5	4	100	0.44	0.656283	9.09091	5.42449	5.81199e-08	4	GLI3_Hand2_third_motif	GLI3_only_first_motif	FR	-5	GLI3	GLI3	0
GLI3_Hand2_third_motif.jpwm|GLI3_only_first_motif.jpwm|FF|8	1	100	0.18	0.411452	5.55556	1.99294	0.0462679	1	GLI3_Hand2_third_motif	GLI3_only_first_motif	FF	8	GLI3	GLI3	0
GLI3_Hand2_third_motif.jpwm|GLI3_only_first_motif.jpwm|RF|24	1	100	0.3	0.559581	3.33333	1.25094	0.210958	1	GLI3_Hand2_third_motif	GLI3_only_first_motif	RF	24	GLI3	GLI3	0
GLI3_Hand2_third_motif.jpwm|GLI3_only_first_motif.jpwm|RF|25	1	100	0.29	0.53739	3.44828	1.3212	0.186434	1	GLI3_Hand2_third_motif	GLI3_only_first_motif	RF	25	GLI3	GLI3	0
GLI3_Hand2_third_motif.jpwm|GLI3_only_first_motif.jpwm|RF|26	1	100	0.23	0.446196	4.34783	1.7257	0.0844016	1	GLI3_Hand2_third_motif	GLI3_only_first_motif	RF	26	GLI3	GLI3	0
GLI3_Hand2_third_motif.jpwm|GLI3_only_first_motif.jpwm|RF|20	2	100	0.24	0.494822	8.33333	3.55684	0.000375347	2	GLI3_Hand2_third_motif	GLI3_only_first_motif	RF	20	GLI3	GLI3	0
GLI3_Hand2_third_motif.jpwm|GLI3_only_first_motif.jpwm|RF|21	1	100	0.24	0.494822	4.16667	1.53591	0.124561	1	GLI3_Hand2_third_motif	GLI3_only_first_motif	RF	21	GLI3	GLI3	0
GLI3_Hand2_third_motif.jpwm|GLI3_only_first_motif.jpwm|RF|38	2	100	0.34	0.554504	5.88235	2.99367	0.00275647	2	GLI3_Hand2_third_motif	GLI3_only_first_motif	RF	38	GLI3	GLI3	0
GLI3_Hand2_third_motif.jpwm|GLI3_only_first_motif.jpwm|RF|37	2	100	0.26	0.484507	7.69231	3.59128	0.000329063	2	GLI3_Hand2_third_motif	GLI3_only_first_motif	RF	37	GLI3	GLI3	0
GLI3_Hand2_third_motif.jpwm|GLI3_only_first_motif.jpwm|RF|34	3	100	0.36	0.5777	8.33333	4.56985	4.88084e-06	3	GLI3_Hand2_third_motif	GLI3_only_first_motif	RF	34	GLI3	GLI3	0
GLI3_Hand2_third_motif.jpwm|GLI3_only_first_motif.jpwm|RF|33	1	100	0.25	0.479372	4	1.56455	0.11769	1	GLI3_Hand2_third_motif	GLI3_only_first_motif	RF	33	GLI3	GLI3	0
GLI3_Hand2_third_motif.jpwm|GLI3_only_first_motif.jpwm|RF|32	2	100	0.3	0.57735	6.66667	2.94449	0.00323491	2	GLI3_Hand2_third_motif	GLI3_only_first_motif	RF	32	GLI3	GLI3	0
GLI3_Hand2_third_motif.jpwm|GLI3_only_first_motif.jpwm|RF|31	1	100	0.21	0.433333	4.7619	1.82308	0.0682917	1	GLI3_Hand2_third_motif	GLI3_only_first_motif	RF	31	GLI3	GLI3	0
GLI3_Hand2_third_motif.jpwm|GLI3_only_first_motif.jpwm|FF|89	1	100	0.14	0.376588	7.14286	2.28367	0.0223912	1	GLI3_Hand2_third_motif	GLI3_only_first_motif	FF	89	GLI3	GLI3	0
GLI3_Hand2_third_motif.jpwm|GLI3_only_first_motif.jpwm|FF|84	1	100	0.19	0.394277	5.26316	2.05439	0.0399378	1	GLI3_Hand2_third_motif	GLI3_only_first_motif	FF	84	GLI3	GLI3	0
GLI3_Hand2_third_motif.jpwm|GLI3_only_first_motif.jpwm|FR|24	2	100	0.34	0.572431	5.88235	2.89991	0.00373264	2	GLI3_Hand2_third_motif	GLI3_only_first_motif	FR	24	GLI3	GLI3	0
GLI3_Hand2_third_motif.jpwm|GLI3_only_first_motif.jpwm|FR|26	1	100	0.32	0.583961	3.125	1.16446	0.244237	1	GLI3_Hand2_third_motif	GLI3_only_first_motif	FR	26	GLI3	GLI3	0
GLI3_Hand2_third_motif.jpwm|GLI3_only_first_motif.jpwm|FR|28	8	100	0.19	0.442559	42.1053	17.6474	1.06627e-69	8	GLI3_Hand2_third_motif	GLI3_only_first_motif	FR	28	GLI3	GLI3	0
GLI3_Hand2_third_motif.jpwm|GLI3_only_first_motif.jpwm|FF|98	1	100	0.16	0.394917	6.25	2.12703	0.0334177	1	GLI3_Hand2_third_motif	GLI3_only_first_motif	FF	98	GLI3	GLI3	0
GLI3_Hand2_third_motif.jpwm|GLI3_only_first_motif.jpwm|FF|90	1	100	0.21	0.498381	4.7619	1.58513	0.112936	1	GLI3_Hand2_third_motif	GLI3_only_first_motif	FF	90	GLI3	GLI3	0
GLI3_Hand2_third_motif.jpwm|GLI3_only_first_motif.jpwm|FF|24	2	100	0.18	0.43531	11.1111	4.18093	2.90323e-05	2	GLI3_Hand2_third_motif	GLI3_only_first_motif	FF	24	GLI3	GLI3	0
GLI3_Hand2_third_motif.jpwm|GLI3_only_first_motif.jpwm|FF|83	1	100	0.21	0.498381	4.7619	1.58513	0.112936	1	GLI3_Hand2_third_motif	GLI3_only_first_motif	FF	83	GLI3	GLI3	0
GLI3_Hand2_third_motif.jpwm|GLI3_only_first_motif.jpwm|RF|-3	1	100	0.12	0.326599	8.33333	2.69444	0.00705073	1	GLI3_Hand2_third_motif	GLI3_only_first_motif	RF	-3	GLI3	GLI3	0
GLI3_Hand2_third_motif.jpwm|GLI3_only_first_motif.jpwm|RF|-5	1	100	0.01	0.1	100	9.9	4.16275e-23	1	GLI3_Hand2_third_motif	GLI3_only_first_motif	RF	-5	GLI3	GLI3	0
GLI3_Hand2_third_motif.jpwm|GLI3_only_first_motif.jpwm|FR|37	1	100	0.28	0.58741	3.57143	1.22572	0.220304	1	GLI3_Hand2_third_motif	GLI3_only_first_motif	FR	37	GLI3	GLI3	0
GLI3_Hand2_third_motif.jpwm|GLI3_only_first_motif.jpwm|FR|30	9	100	0.22	0.439927	40.9091	19.9579	1.28035e-88	9	GLI3_Hand2_third_motif	GLI3_only_first_motif	FR	30	GLI3	GLI3	0
GLI3_Hand2_third_motif.jpwm|GLI3_only_first_motif.jpwm|FR|38	1	100	0.23	0.468287	4.34783	1.64429	0.100116	1	GLI3_Hand2_third_motif	GLI3_only_first_motif	FR	38	GLI3	GLI3	0
GLI3_Hand2_third_motif.jpwm|GLI3_only_first_motif.jpwm|RF|17	1	100	0.33	0.58698	3.0303	1.14144	0.253689	1	GLI3_Hand2_third_motif	GLI3_only_first_motif	RF	17	GLI3	GLI3	0
GLI3_Hand2_third_motif.jpwm|GLI3_only_first_motif.jpwm|RF|16	1	100	0.43	0.555141	2.32558	1.02677	0.304531	1	GLI3_Hand2_third_motif	GLI3_only_first_motif	RF	16	GLI3	GLI3	0
GLI3_Hand2_third_motif.jpwm|GLI3_only_first_motif.jpwm|RF|11	2	100	0.33	0.58698	6.06061	2.84507	0.00444014	2	GLI3_Hand2_third_motif	GLI3_only_first_motif	RF	11	GLI3	GLI3	0
GLI3_Hand2_third_motif.jpwm|GLI3_only_first_motif.jpwm|RF|12	1	100	0.21	0.477684	4.7619	1.65381	0.0981654	1	GLI3_Hand2_third_motif	GLI3_only_first_motif	RF	12	GLI3	GLI3	0
GLI3_Hand2_third_motif.jpwm|GLI3_only_first_motif.jpwm|FF|64	2	100	0.2	0.402015	10	4.47744	7.55422e-06	2	GLI3_Hand2_third_motif	GLI3_only_first_motif	FF	64	GLI3	GLI3	0
GLI3_Hand2_third_motif.jpwm|GLI3_only_first_motif.jpwm|FF|65	1	100	0.14	0.376588	7.14286	2.28367	0.0223912	1	GLI3_Hand2_third_motif	GLI3_only_first_motif	FF	65	GLI3	GLI3	0
GLI3_Hand2_third_motif.jpwm|GLI3_only_first_motif.jpwm|FF|61	1	100	0.18	0.411452	5.55556	1.99294	0.0462679	1	GLI3_Hand2_third_motif	GLI3_only_first_motif	FF	61	GLI3	GLI3	0
GLI3_Hand2_third_motif.jpwm|GLI3_only_first_motif.jpwm|FF|63	1	100	0.21	0.433333	4.7619	1.82308	0.0682917	1	GLI3_Hand2_third_motif	GLI3_only_first_motif	FF	63	GLI3	GLI3	0
GLI3_Hand2_third_motif.jpwm|GLI3_only_first_motif.jpwm|FR|22	1	100	0.3	0.541229	3.33333	1.29335	0.195889	1	GLI3_Hand2_third_motif	GLI3_only_first_motif	FR	22	GLI3	GLI3	0
GLI3_Hand2_third_motif.jpwm|GLI3_only_first_motif.jpwm|FR|29	1	100	0.25	0.5	4	1.5	0.133614	1	GLI3_Hand2_third_motif	GLI3_only_first_motif	FR	29	GLI3	GLI3	0
GLI3_Hand2_third_motif.jpwm|GLI3_only_first_motif.jpwm|RF|62	1	100	0.21	0.433333	4.7619	1.82308	0.0682917	1	GLI3_Hand2_third_motif	GLI3_only_first_motif	RF	62	GLI3	GLI3	0
GLI3_Hand2_third_motif.jpwm|GLI3_only_first_motif.jpwm|RF|69	1	100	0.23	0.422953	4.34783	1.82054	0.0686776	1	GLI3_Hand2_third_motif	GLI3_only_first_motif	RF	69	GLI3	GLI3	0
GLI3_Hand2_third_motif.jpwm|GLI3_only_first_motif.jpwm|FF|76	2	100	0.11	0.345096	18.1818	5.47674	4.33221e-08	2	GLI3_Hand2_third_motif	GLI3_only_first_motif	FF	76	GLI3	GLI3	0
GLI3_Hand2_third_motif.jpwm|GLI3_only_first_motif.jpwm|FF|74	1	100	0.18	0.43531	5.55556	1.88371	0.0596036	1	GLI3_Hand2_third_motif	GLI3_only_first_motif	FF	74	GLI3	GLI3	0
GLI3_Hand2_third_motif.jpwm|GLI3_only_first_motif.jpwm|FF|42	1	100	0.16	0.394917	6.25	2.12703	0.0334177	1	GLI3_Hand2_third_motif	GLI3_only_first_motif	FF	42	GLI3	GLI3	0
GLI3_Hand2_third_motif.jpwm|GLI3_only_first_motif.jpwm|FR|18	1	100	0.23	0.529055	4.34783	1.45543	0.145551	1	GLI3_Hand2_third_motif	GLI3_only_first_motif	FR	18	GLI3	GLI3	0
GLI3_Hand2_third_motif.jpwm|GLI3_only_first_motif.jpwm|FR|16	4	100	0.31	0.544857	12.9032	6.77242	1.26642e-11	4	GLI3_Hand2_third_motif	GLI3_only_first_motif	FR	16	GLI3	GLI3	0
GLI3_Hand2_third_motif.jpwm|GLI3_only_first_motif.jpwm|FR|10	4	100	0.32	0.548276	12.5	6.71195	1.92036e-11	4	GLI3_Hand2_third_motif	GLI3_only_first_motif	FR	10	GLI3	GLI3	0
GLI3_Hand2_third_motif.jpwm|GLI3_only_first_motif.jpwm|FR|13	3	100	0.33	0.603943	9.09091	4.42095	9.82702e-06	3	GLI3_Hand2_third_motif	GLI3_only_first_motif	FR	13	GLI3	GLI3	0
GLI3_Hand2_third_motif.jpwm|GLI3_only_first_motif.jpwm|FR|12	1	100	0.37	0.562372	2.7027	1.12025	0.262605	1	GLI3_Hand2_third_motif	GLI3_only_first_motif	FR	12	GLI3	GLI3	0
GLI3_Hand2_third_motif.jpwm|GLI3_only_first_motif.jpwm|RF|74	4	100	0.15	0.385992	26.6667	9.9743	1.97494e-23	4	GLI3_Hand2_third_motif	GLI3_only_first_motif	RF	74	GLI3	GLI3	0
GLI3_Hand2_third_motif.jpwm|GLI3_only_first_motif.jpwm|FF|41	1	100	0.17	0.403395	5.88235	2.05754	0.0396345	1	GLI3_Hand2_third_motif	GLI3_only_first_motif	FF	41	GLI3	GLI3	0
GLI3_Hand2_third_motif.jpwm|GLI3_only_first_motif.jpwm|FF|46	1	100	0.13	0.337998	7.69231	2.57398	0.0100535	1	GLI3_Hand2_third_motif	GLI3_only_first_motif	FF	46	GLI3	GLI3	0
GLI3_Hand2_third_motif.jpwm|GLI3_only_first_motif.jpwm|FF|48	1	100	0.18	0.457927	5.55556	1.79068	0.0733448	1	GLI3_Hand2_third_motif	GLI3_only_first_motif	FF	48	GLI3	GLI3	0
GLI3_only_first_motif.jpwm|GLI3_only_first_motif.jpwm|FF|89	1	100	0.11	0.399368	9.09091	2.22852	0.0258459	1	GLI3_only_first_motif	GLI3_only_first_motif	FF	89	GLI3	GLI3	0
GLI3_only_first_motif.jpwm|GLI3_only_first_motif.jpwm|FF|80	1	100	0.05	0.219043	20	4.33705	1.44408e-05	1	GLI3_only_first_motif	GLI3_only_first_motif	FF	80	GLI3	GLI3	0
GLI3_only_first_motif.jpwm|GLI3_only_first_motif.jpwm|FR|1	1	100	0.02	0.140705	50	6.96491	3.28609e-12	1	GLI3_only_first_motif	GLI3_only_first_motif	FR	1	GLI3	GLI3	0
GLI3_only_first_motif.jpwm|GLI3_only_first_motif.jpwm|FF|6	1	100	0.06	0.238683	16.6667	3.93827	8.20699e-05	1	GLI3_only_first_motif	GLI3_only_first_motif	FF	6	GLI3	GLI3	0
GLI3_only_first_motif.jpwm|GLI3_only_first_motif.jpwm|FF|7	1	100	0.05	0.219043	20	4.33705	1.44408e-05	1	GLI3_only_first_motif	GLI3_only_first_motif	FF	7	GLI3	GLI3	0
GLI3_only_first_motif.jpwm|GLI3_only_first_motif.jpwm|FF|1	1	100	0.03	0.171447	33.3333	5.65774	1.53381e-08	1	GLI3_only_first_motif	GLI3_only_first_motif	FF	1	GLI3	GLI3	0
GLI3_only_first_motif.jpwm|GLI3_only_first_motif.jpwm|FF|3	2	100	0.06	0.238683	33.3333	8.12793	4.36695e-16	2	GLI3_only_first_motif	GLI3_only_first_motif	FF	3	GLI3	GLI3	0
GLI3_only_first_motif.jpwm|GLI3_only_first_motif.jpwm|FF|8	1	100	0.08	0.27266	12.5	3.37417	0.000740396	1	GLI3_only_first_motif	GLI3_only_first_motif	FF	8	GLI3	GLI3	0
GLI3_only_first_motif.jpwm|GLI3_only_first_motif.jpwm|FF|9	2	100	0.07	0.256432	28.5714	7.52635	5.21783e-14	2	GLI3_only_first_motif	GLI3_only_first_motif	FF	9	GLI3	GLI3	0
GLI3_only_first_motif.jpwm|GLI3_only_first_motif.jpwm|FF|93	1	100	0.05	0.219043	20	4.33705	1.44408e-05	1	GLI3_only_first_motif	GLI3_only_first_motif	FF	93	GLI3	GLI3	0
GLI3_only_first_motif.jpwm|GLI3_only_first_motif.jpwm|FR|99	1	100	1	1	1	0	1	1	GLI3_only_first_motif	GLI3_only_first_motif	FR	99	GLI3	GLI3	0
GLI3_only_first_motif.jpwm|GLI3_only_first_motif.jpwm|FR|84	1	100	0.04	0.196946	25	4.87442	1.09127e-06	1	GLI3_only_first_motif	GLI3_only_first_motif	FR	84	GLI3	GLI3	0
GLI3_only_first_motif.jpwm|GLI3_only_first_motif.jpwm|RF|38	1	100	0.03	0.171447	33.3333	5.65774	1.53381e-08	1	GLI3_only_first_motif	GLI3_only_first_motif	RF	38	GLI3	GLI3	0
GLI3_only_first_motif.jpwm|GLI3_only_first_motif.jpwm|RF|32	1	100	0.04	0.196946	25	4.87442	1.09127e-06	1	GLI3_only_first_motif	GLI3_only_first_motif	RF	32	GLI3	GLI3	0
GLI3_only_first_motif.jpwm|GLI3_only_first_motif.jpwm|FF|73	1	100	0.06	0.238683	16.6667	3.93827	8.20699e-05	1	GLI3_only_first_motif	GLI3_only_first_motif	FF	73	GLI3	GLI3	0
GLI3_only_first_motif.jpwm|GLI3_only_first_motif.jpwm|FF|40	1	100	0.08	0.27266	12.5	3.37417	0.000740396	1	GLI3_only_first_motif	GLI3_only_first_motif	FF	40	GLI3	GLI3	0
GLI3_only_first_motif.jpwm|GLI3_only_first_motif.jpwm|FF|71	1	100	0.1	0.362372	10	2.48364	0.0130048	1	GLI3_only_first_motif	GLI3_only_first_motif	FF	71	GLI3	GLI3	0
GLI3_only_first_motif.jpwm|GLI3_only_first_motif.jpwm|FF|100	1	100	0.04	0.196946	25	4.87442	1.09127e-06	1	GLI3_only_first_motif	GLI3_only_first_motif	FF	100	GLI3	GLI3	0
GLI3_only_first_motif.jpwm|GLI3_only_first_motif.jpwm|FF|52	2	100	0.06	0.277798	33.3333	6.98349	2.87932e-12	2	GLI3_only_first_motif	GLI3_only_first_motif	FF	52	GLI3	GLI3	0
GLI3_only_first_motif.jpwm|GLI3_only_first_motif.jpwm|FF|50	1	100	0.05	0.219043	20	4.33705	1.44408e-05	1	GLI3_only_first_motif	GLI3_only_first_motif	FF	50	GLI3	GLI3	0
GLI3_only_first_motif.jpwm|GLI3_only_first_motif.jpwm|FF|57	2	100	0.07	0.256432	28.5714	7.52635	5.21783e-14	2	GLI3_only_first_motif	GLI3_only_first_motif	FF	57	GLI3	GLI3	0
GLI3_only_first_motif.jpwm|GLI3_only_first_motif.jpwm|RF|65	1	100	0.03	0.171447	33.3333	5.65774	1.53381e-08	1	GLI3_only_first_motif	GLI3_only_first_motif	RF	65	GLI3	GLI3	0
GLI3_only_first_motif.jpwm|GLI3_only_first_motif.jpwm|RF|60	1	100	0.05	0.219043	20	4.33705	1.44408e-05	1	GLI3_only_first_motif	GLI3_only_first_motif	RF	60	GLI3	GLI3	0
GLI3_only_first_motif.jpwm|GLI3_only_first_motif.jpwm|FF|24	1	100	0.08	0.27266	12.5	3.37417	0.000740396	1	GLI3_only_first_motif	GLI3_only_first_motif	FF	24	GLI3	GLI3	0
GLI3_only_first_motif.jpwm|GLI3_only_first_motif.jpwm|FF|23	1	100	0.08	0.27266	12.5	3.37417	0.000740396	1	GLI3_only_first_motif	GLI3_only_first_motif	FF	23	GLI3	GLI3	0
GLI3_only_first_motif.jpwm|GLI3_only_first_motif.jpwm|FF|21	2	100	0.09	0.320826	22.2222	5.95338	2.62655e-09	2	GLI3_only_first_motif	GLI3_only_first_motif	FF	21	GLI3	GLI3	0
GLI3_only_first_motif.jpwm|GLI3_only_first_motif.jpwm|FF|20	1	100	0.13	0.337998	7.69231	2.57398	0.0100535	1	GLI3_only_first_motif	GLI3_only_first_motif	FF	20	GLI3	GLI3	0
GLI3_only_first_motif.jpwm|GLI3_only_first_motif.jpwm|FR|23	1	100	0.04	0.196946	25	4.87442	1.09127e-06	1	GLI3_only_first_motif	GLI3_only_first_motif	FR	23	GLI3	GLI3	0
GLI3_only_first_motif.jpwm|GLI3_only_first_motif.jpwm|FR|20	2	100	0.06	0.238683	33.3333	8.12793	4.36695e-16	2	GLI3_only_first_motif	GLI3_only_first_motif	FR	20	GLI3	GLI3	0
GLI3_only_first_motif.jpwm|GLI3_only_first_motif.jpwm|FR|27	1	100	0.05	0.219043	20	4.33705	1.44408e-05	1	GLI3_only_first_motif	GLI3_only_first_motif	FR	27	GLI3	GLI3	0
GLI3_only_first_motif.jpwm|GLI3_only_first_motif.jpwm|FR|24	1	100	0.02	0.140705	50	6.96491	3.28609e-12	1	GLI3_only_first_motif	GLI3_only_first_motif	FR	24	GLI3	GLI3	0
GLI3_only_first_motif.jpwm|GLI3_only_first_motif.jpwm|FR|28	1	100	0.04	0.196946	25	4.87442	1.09127e-06	1	GLI3_only_first_motif	GLI3_only_first_motif	FR	28	GLI3	GLI3	0
GLI3_only_first_motif.jpwm|GLI3_only_first_motif.jpwm|FF|97	1	100	0.07	0.256432	14.2857	3.62669	0.000287081	1	GLI3_only_first_motif	GLI3_only_first_motif	FF	97	GLI3	GLI3	0
GLI3_only_first_motif.jpwm|GLI3_only_first_motif.jpwm|FF|38	1	100	0.06	0.238683	16.6667	3.93827	8.20699e-05	1	GLI3_only_first_motif	GLI3_only_first_motif	FF	38	GLI3	GLI3	0
GLI3_only_first_motif.jpwm|GLI3_only_first_motif.jpwm|FF|32	1	100	0.11	0.314466	9.09091	2.83019	0.00465197	1	GLI3_only_first_motif	GLI3_only_first_motif	FF	32	GLI3	GLI3	0
GLI3_only_first_motif.jpwm|GLI3_only_first_motif.jpwm|FR|-5	1	100	0.02	0.140705	50	6.96491	3.28609e-12	1	GLI3_only_first_motif	GLI3_only_first_motif	FR	-5	GLI3	GLI3	0
GLI3_only_first_motif.jpwm|GLI3_only_first_motif.jpwm|FR|33	1	100	0.02	0.140705	50	6.96491	3.28609e-12	1	GLI3_only_first_motif	GLI3_only_first_motif	FR	33	GLI3	GLI3	0
GLI3_only_first_motif.jpwm|GLI3_only_first_motif.jpwm|FR|36	1	100	0.05	0.219043	20	4.33705	1.44408e-05	1	GLI3_only_first_motif	GLI3_only_first_motif	FR	36	GLI3	GLI3	0
GLI3_only_first_motif.jpwm|GLI3_only_first_motif.jpwm|RF|9	1	100	0.04	0.196946	25	4.87442	1.09127e-06	1	GLI3_only_first_motif	GLI3_only_first_motif	RF	9	GLI3	GLI3	0
GLI3_only_first_motif.jpwm|GLI3_only_first_motif.jpwm|RF|0	1	100	0.03	0.171447	33.3333	5.65774	1.53381e-08	1	GLI3_only_first_motif	GLI3_only_first_motif	RF	0	GLI3	GLI3	0
GLI3_only_first_motif.jpwm|GLI3_only_first_motif.jpwm|RF|54	1	100	0.03	0.171447	33.3333	5.65774	1.53381e-08	1	GLI3_only_first_motif	GLI3_only_first_motif	RF	54	GLI3	GLI3	0
GLI3_only_first_motif.jpwm|GLI3_only_first_motif.jpwm|FR|19	1	100	0.08	0.27266	12.5	3.37417	0.000740396	1	GLI3_only_first_motif	GLI3_only_first_motif	FR	19	GLI3	GLI3	0
GLI3_only_first_motif.jpwm|GLI3_only_first_motif.jpwm|FF|-5	1	100	0.01	0.1	100	9.9	4.16275e-23	1	GLI3_only_first_motif	GLI3_only_first_motif	FF	-5	GLI3	GLI3	0
GLI3_only_first_motif.jpwm|GLI3_only_first_motif.jpwm|FR|65	1	100	0.06	0.238683	16.6667	3.93827	8.20699e-05	1	GLI3_only_first_motif	GLI3_only_first_motif	FR	65	GLI3	GLI3	0
GLI3_only_first_motif.jpwm|GLI3_only_first_motif.jpwm|RF|83	1	100	0.02	0.140705	50	6.96491	3.28609e-12	1	GLI3_only_first_motif	GLI3_only_first_motif	RF	83	GLI3	GLI3	0
GLI3_only_first_motif.jpwm|GLI3_only_first_motif.jpwm|FR|49	1	100	0.01	0.1	100	9.9	4.16275e-23	1	GLI3_only_first_motif	GLI3_only_first_motif	FR	49	GLI3	GLI3	0
GLI3_only_first_motif.jpwm|GLI3_only_first_motif.jpwm|FF|36	2	100	0.12	0.383498	16.6667	4.90224	9.47489e-07	2	GLI3_only_first_motif	GLI3_only_first_motif	FF	36	GLI3	GLI3	0
M04150_2.00.jpwm|GLI3_only_first_motif.jpwm|FF|33	1	100	0.12	0.326599	8.33333	2.69444	0.00705073	1	Hand2	GLI3_only_first_motif	FF	33	Hand2	GLI3	1
M04150_2.00.jpwm|GLI3_only_first_motif.jpwm|FF|35	1	100	0.05	0.219043	20	4.33705	1.44408e-05	1	Hand2	GLI3_only_first_motif	FF	35	Hand2	GLI3	1
M04150_2.00.jpwm|GLI3_only_first_motif.jpwm|FF|26	1	100	0.09	0.287623	11.1111	3.16386	0.00155693	1	Hand2	GLI3_only_first_motif	FF	26	Hand2	GLI3	1
M04150_2.00.jpwm|GLI3_only_first_motif.jpwm|FF|27	1	100	0.09	0.287623	11.1111	3.16386	0.00155693	1	Hand2	GLI3_only_first_motif	FF	27	Hand2	GLI3	1
M04150_2.00.jpwm|GLI3_only_first_motif.jpwm|FF|21	1	100	0.11	0.314466	9.09091	2.83019	0.00465197	1	Hand2	GLI3_only_first_motif	FF	21	Hand2	GLI3	1
M04150_2.00.jpwm|GLI3_only_first_motif.jpwm|FF|-6	5	100	2.37	1.48837	2.1097	1.76703	0.0772231	5	Hand2	GLI3_only_first_motif	FF	-6	Hand2	GLI3	1
M04150_2.00.jpwm|GLI3_only_first_motif.jpwm|FF|65	1	100	0.09	0.320826	11.1111	2.83643	0.00456211	1	Hand2	GLI3_only_first_motif	FF	65	Hand2	GLI3	1
M04150_2.00.jpwm|GLI3_only_first_motif.jpwm|FF|91	1	100	0.07	0.256432	14.2857	3.62669	0.000287081	1	Hand2	GLI3_only_first_motif	FF	91	Hand2	GLI3	1
M04150_2.00.jpwm|GLI3_only_first_motif.jpwm|FF|93	1	100	0.05	0.219043	20	4.33705	1.44408e-05	1	Hand2	GLI3_only_first_motif	FF	93	Hand2	GLI3	1
M04150_2.00.jpwm|GLI3_only_first_motif.jpwm|FF|81	1	100	0.07	0.256432	14.2857	3.62669	0.000287081	1	Hand2	GLI3_only_first_motif	FF	81	Hand2	GLI3	1
M04150_2.00.jpwm|GLI3_only_first_motif.jpwm|FF|100	2	100	0.04	0.196946	50	9.95195	2.47297e-23	2	Hand2	GLI3_only_first_motif	FF	100	Hand2	GLI3	1
M04150_2.00.jpwm|GLI3_only_first_motif.jpwm|FF|50	1	100	0.09	0.320826	11.1111	2.83643	0.00456211	1	Hand2	GLI3_only_first_motif	FF	50	Hand2	GLI3	1
M04150_2.00.jpwm|GLI3_only_first_motif.jpwm|FF|54	1	100	0.18	0.411452	5.55556	1.99294	0.0462679	1	Hand2	GLI3_only_first_motif	FF	54	Hand2	GLI3	1
M04150_2.00.jpwm|GLI3_only_first_motif.jpwm|FF|56	2	100	0.11	0.345096	18.1818	5.47674	4.33221e-08	2	Hand2	GLI3_only_first_motif	FF	56	Hand2	GLI3	1
M04150_2.00.jpwm|GLI3_only_first_motif.jpwm|FF|47	1	100	0.1	0.301511	10	2.98496	0.00283613	1	Hand2	GLI3_only_first_motif	FF	47	Hand2	GLI3	1
M04150_2.00.jpwm|GLI3_only_first_motif.jpwm|FF|71	1	100	0.13	0.337998	7.69231	2.57398	0.0100535	1	Hand2	GLI3_only_first_motif	FF	71	Hand2	GLI3	1
M04150_2.00.jpwm|GLI3_only_first_motif.jpwm|FF|8	1	100	0.1	0.362372	10	2.48364	0.0130048	1	Hand2	GLI3_only_first_motif	FF	8	Hand2	GLI3	1
M04150_2.00.jpwm|GLI3_only_first_motif.jpwm|FF|2	1	100	0.03	0.171447	33.3333	5.65774	1.53381e-08	1	Hand2	GLI3_only_first_motif	FF	2	Hand2	GLI3	1
M04150_2.00.jpwm|GLI3_only_first_motif.jpwm|FF|64	1	100	0.12	0.356186	8.33333	2.47062	0.013488	1	Hand2	GLI3_only_first_motif	FF	64	Hand2	GLI3	1
M04150_2.00.jpwm|GLI3_only_first_motif.jpwm|FF|12	1	100	0.13	0.366667	7.69231	2.37273	0.0176573	1	Hand2	GLI3_only_first_motif	FF	12	Hand2	GLI3	1
GLI3_Hand2_second_motif.jpwm|M04150_2.00.jpwm|FF|38	2	100	1.02	0.984527	1.96078	0.995402	0.319541	2	GLI3_Hand2_second_motif	Hand2	FF	38	GLI3	Hand2	1
GLI3_Hand2_second_motif.jpwm|M04150_2.00.jpwm|FF|30	1	100	0.84	0.884433	1.19048	0.180907	0.856441	1	GLI3_Hand2_second_motif	Hand2	FF	30	GLI3	Hand2	1
GLI3_Hand2_second_motif.jpwm|M04150_2.00.jpwm|FF|31	1	100	0.79	0.945964	1.26582	0.221996	0.824317	1	GLI3_Hand2_second_motif	Hand2	FF	31	GLI3	Hand2	1
GLI3_Hand2_second_motif.jpwm|M04150_2.00.jpwm|FF|33	2	100	0.86	0.984937	2.32558	1.15743	0.247095	2	GLI3_Hand2_second_motif	Hand2	FF	33	GLI3	Hand2	1
GLI3_Hand2_second_motif.jpwm|M04150_2.00.jpwm|RF|4	3	100	0.97	0.869866	3.09278	2.33369	0.0196118	3	GLI3_Hand2_second_motif	Hand2	RF	4	GLI3	Hand2	1
GLI3_Hand2_second_motif.jpwm|M04150_2.00.jpwm|RF|5	1	100	0.91	0.954468	1.0989	0.0942933	0.924876	1	GLI3_Hand2_second_motif	Hand2	RF	5	GLI3	Hand2	1
GLI3_Hand2_second_motif.jpwm|M04150_2.00.jpwm|RF|6	1	100	0.97	1.05844	1.03093	0.0283435	0.977388	1	GLI3_Hand2_second_motif	Hand2	RF	6	GLI3	Hand2	1
GLI3_Hand2_second_motif.jpwm|M04150_2.00.jpwm|RF|0	2	100	1.35	1.25831	1.48148	0.516568	0.605458	2	GLI3_Hand2_second_motif	Hand2	RF	0	GLI3	Hand2	1
GLI3_Hand2_second_motif.jpwm|M04150_2.00.jpwm|RF|2	1	100	1.03	1.0096	0.970874	-0.0297147	0.976295	1	GLI3_Hand2_second_motif	Hand2	RF	2	GLI3	Hand2	1
GLI3_Hand2_second_motif.jpwm|M04150_2.00.jpwm|RF|3	1	100	1.27	1.09041	0.787402	-0.247614	0.804433	1	GLI3_Hand2_second_motif	Hand2	RF	3	GLI3	Hand2	1
GLI3_Hand2_second_motif.jpwm|M04150_2.00.jpwm|FF|37	1	100	0.78	0.959587	1.28205	0.229265	0.818663	1	GLI3_Hand2_second_motif	Hand2	FF	37	GLI3	Hand2	1
GLI3_Hand2_second_motif.jpwm|M04150_2.00.jpwm|RF|8	1	100	1.06	1.00323	0.943396	-0.059807	0.952309	1	GLI3_Hand2_second_motif	Hand2	RF	8	GLI3	Hand2	1
GLI3_Hand2_second_motif.jpwm|M04150_2.00.jpwm|RF|9	2	100	0.78	0.77303	2.5641	1.5782	0.114519	2	GLI3_Hand2_second_motif	Hand2	RF	9	GLI3	Hand2	1
GLI3_Hand2_second_motif.jpwm|M04150_2.00.jpwm|FR|69	1	100	0.96	0.909212	1.04167	0.0439941	0.964909	1	GLI3_Hand2_second_motif	Hand2	FR	69	GLI3	Hand2	1
GLI3_Hand2_second_motif.jpwm|M04150_2.00.jpwm|FR|68	1	100	0.83	0.899551	1.20482	0.188983	0.850106	1	GLI3_Hand2_second_motif	Hand2	FR	68	GLI3	Hand2	1
GLI3_Hand2_second_motif.jpwm|M04150_2.00.jpwm|FR|63	2	100	0.86	0.964208	2.32558	1.18232	0.23708	2	GLI3_Hand2_second_motif	Hand2	FR	63	GLI3	Hand2	1
GLI3_Hand2_second_motif.jpwm|M04150_2.00.jpwm|FR|61	2	100	0.77	0.86287	2.5974	1.42547	0.15402	2	GLI3_Hand2_second_motif	Hand2	FR	61	GLI3	Hand2	1
GLI3_Hand2_second_motif.jpwm|M04150_2.00.jpwm|FR|60	1	100	0.9	0.958745	1.11111	0.104303	0.916929	1	GLI3_Hand2_second_motif	Hand2	FR	60	GLI3	Hand2	1
GLI3_Hand2_second_motif.jpwm|M04150_2.00.jpwm|RF|29	2	100	1.08	1.12528	1.85185	0.817572	0.413602	2	GLI3_Hand2_second_motif	Hand2	RF	29	GLI3	Hand2	1
GLI3_Hand2_second_motif.jpwm|M04150_2.00.jpwm|RF|27	1	100	0.97	1.0096	1.03093	0.0297147	0.976295	1	GLI3_Hand2_second_motif	Hand2	RF	27	GLI3	Hand2	1
GLI3_Hand2_second_motif.jpwm|M04150_2.00.jpwm|RF|24	2	100	0.99	0.999949	2.0202	1.01005	0.312471	2	GLI3_Hand2_second_motif	Hand2	RF	24	GLI3	Hand2	1
GLI3_Hand2_second_motif.jpwm|M04150_2.00.jpwm|RF|21	1	100	0.92	1.1693	1.08696	0.0684167	0.945454	1	GLI3_Hand2_second_motif	Hand2	RF	21	GLI3	Hand2	1
GLI3_Hand2_second_motif.jpwm|M04150_2.00.jpwm|RF|20	1	100	0.98	1.08227	1.02041	0.0184796	0.985256	1	GLI3_Hand2_second_motif	Hand2	RF	20	GLI3	Hand2	1
GLI3_Hand2_second_motif.jpwm|M04150_2.00.jpwm|FF|8	1	100	0.82	0.946872	1.21951	0.1901	0.849231	1	GLI3_Hand2_second_motif	Hand2	FF	8	GLI3	Hand2	1
GLI3_Hand2_second_motif.jpwm|M04150_2.00.jpwm|FF|4	2	100	0.78	0.835814	2.5641	1.45965	0.144385	2	GLI3_Hand2_second_motif	Hand2	FF	4	GLI3	Hand2	1
GLI3_Hand2_second_motif.jpwm|M04150_2.00.jpwm|FF|5	3	100	0.87	0.981187	3.44828	2.17084	0.0299432	3	GLI3_Hand2_second_motif	Hand2	FF	5	GLI3	Hand2	1
GLI3_Hand2_second_motif.jpwm|M04150_2.00.jpwm|FF|6	2	100	0.96	1.10937	2.08333	0.937467	0.348518	2	GLI3_Hand2_second_motif	Hand2	FF	6	GLI3	Hand2	1
GLI3_Hand2_second_motif.jpwm|M04150_2.00.jpwm|FR|79	1	100	0.83	0.954045	1.20482	0.178189	0.858575	1	GLI3_Hand2_second_motif	Hand2	FR	79	GLI3	Hand2	1
GLI3_Hand2_second_motif.jpwm|M04150_2.00.jpwm|FR|72	1	100	0.81	0.895499	1.23457	0.212172	0.831973	1	GLI3_Hand2_second_motif	Hand2	FR	72	GLI3	Hand2	1
GLI3_Hand2_second_motif.jpwm|M04150_2.00.jpwm|FR|74	1	100	0.64	0.689312	1.5625	0.52226	0.60149	1	GLI3_Hand2_second_motif	Hand2	FR	74	GLI3	Hand2	1
GLI3_Hand2_second_motif.jpwm|M04150_2.00.jpwm|FR|75	1	100	0.59	0.9	1.69492	0.455556	0.64871	1	GLI3_Hand2_second_motif	Hand2	FR	75	GLI3	Hand2	1
GLI3_Hand2_second_motif.jpwm|M04150_2.00.jpwm|FR|76	1	100	0.77	0.983243	1.2987	0.23392	0.815047	1	GLI3_Hand2_second_motif	Hand2	FR	76	GLI3	Hand2	1
GLI3_Hand2_second_motif.jpwm|M04150_2.00.jpwm|FF|49	1	100	0.74	0.88329	1.35135	0.294354	0.768487	1	GLI3_Hand2_second_motif	Hand2	FF	49	GLI3	Hand2	1
GLI3_Hand2_second_motif.jpwm|M04150_2.00.jpwm|FF|47	1	100	0.87	1.05078	1.14943	0.123717	0.901539	1	GLI3_Hand2_second_motif	Hand2	FF	47	GLI3	Hand2	1
GLI3_Hand2_second_motif.jpwm|M04150_2.00.jpwm|RF|35	1	100	0.86	0.93225	1.16279	0.150174	0.880627	1	GLI3_Hand2_second_motif	Hand2	RF	35	GLI3	Hand2	1
GLI3_Hand2_second_motif.jpwm|M04150_2.00.jpwm|RF|37	9	100	0.93	0.855818	9.67742	9.42958	4.11749e-21	9	GLI3_Hand2_second_motif	Hand2	RF	37	GLI3	Hand2	1
GLI3_Hand2_second_motif.jpwm|M04150_2.00.jpwm|RF|31	3	100	0.84	0.76171	3.57143	2.83573	0.00457218	3	GLI3_Hand2_second_motif	Hand2	RF	31	GLI3	Hand2	1
GLI3_Hand2_second_motif.jpwm|M04150_2.00.jpwm|RF|33	11	100	0.99	1.01	11.1111	9.91089	3.7332e-23	11	GLI3_Hand2_second_motif	Hand2	RF	33	GLI3	Hand2	1
GLI3_Hand2_second_motif.jpwm|M04150_2.00.jpwm|FF|10	2	100	0.87	0.883691	2.29885	1.27873	0.200993	2	GLI3_Hand2_second_motif	Hand2	FF	10	GLI3	Hand2	1
GLI3_Hand2_second_motif.jpwm|M04150_2.00.jpwm|FF|11	1	100	0.74	0.916956	1.35135	0.283547	0.776758	1	GLI3_Hand2_second_motif	Hand2	FF	11	GLI3	Hand2	1
GLI3_Hand2_second_motif.jpwm|M04150_2.00.jpwm|FF|16	2	100	0.87	0.960377	2.29885	1.17662	0.239347	2	GLI3_Hand2_second_motif	Hand2	FF	16	GLI3	Hand2	1
GLI3_Hand2_second_motif.jpwm|M04150_2.00.jpwm|FF|14	2	100	0.76	0.854223	2.63158	1.45161	0.14661	2	GLI3_Hand2_second_motif	Hand2	FF	14	GLI3	Hand2	1
GLI3_Hand2_second_motif.jpwm|M04150_2.00.jpwm|FR|8	1	100	0.86	0.85304	1.16279	0.164119	0.869637	1	GLI3_Hand2_second_motif	Hand2	FR	8	GLI3	Hand2	1
GLI3_Hand2_second_motif.jpwm|M04150_2.00.jpwm|FR|9	2	100	0.95	0.880484	2.10526	1.19253	0.233055	2	GLI3_Hand2_second_motif	Hand2	FR	9	GLI3	Hand2	1
GLI3_Hand2_second_motif.jpwm|M04150_2.00.jpwm|FR|4	1	100	0.82	0.903193	1.21951	0.199293	0.842034	1	GLI3_Hand2_second_motif	Hand2	FR	4	GLI3	Hand2	1
GLI3_Hand2_second_motif.jpwm|M04150_2.00.jpwm|FR|6	2	100	1.04	1.05333	1.92308	0.911399	0.362085	2	GLI3_Hand2_second_motif	Hand2	FR	6	GLI3	Hand2	1
GLI3_Hand2_second_motif.jpwm|M04150_2.00.jpwm|FR|1	2	100	0.93	0.901794	2.15054	1.18652	0.235415	2	GLI3_Hand2_second_motif	Hand2	FR	1	GLI3	Hand2	1
GLI3_Hand2_second_motif.jpwm|M04150_2.00.jpwm|FR|2	1	100	1.05	0.96792	0.952381	-0.0516572	0.958802	1	GLI3_Hand2_second_motif	Hand2	FR	2	GLI3	Hand2	1
GLI3_Hand2_second_motif.jpwm|M04150_2.00.jpwm|FR|44	2	100	0.84	1.05141	2.38095	1.10328	0.269904	2	GLI3_Hand2_second_motif	Hand2	FR	44	GLI3	Hand2	1
GLI3_Hand2_second_motif.jpwm|M04150_2.00.jpwm|FR|47	1	100	0.88	0.997775	1.13636	0.120268	0.904271	1	GLI3_Hand2_second_motif	Hand2	FR	47	GLI3	Hand2	1
GLI3_Hand2_second_motif.jpwm|M04150_2.00.jpwm|FR|46	2	100	0.71	0.795124	2.8169	1.62239	0.10472	2	GLI3_Hand2_second_motif	Hand2	FR	46	GLI3	Hand2	1
GLI3_Hand2_second_motif.jpwm|M04150_2.00.jpwm|FR|41	2	100	1.04	0.920255	1.92308	1.04319	0.296861	2	GLI3_Hand2_second_motif	Hand2	FR	41	GLI3	Hand2	1
GLI3_Hand2_second_motif.jpwm|M04150_2.00.jpwm|FR|43	1	100	0.84	0.928994	1.19048	0.172229	0.863257	1	GLI3_Hand2_second_motif	Hand2	FR	43	GLI3	Hand2	1
GLI3_Hand2_second_motif.jpwm|M04150_2.00.jpwm|FR|42	2	100	0.86	0.887853	2.32558	1.284	0.199143	2	GLI3_Hand2_second_motif	Hand2	FR	42	GLI3	Hand2	1
GLI3_Hand2_second_motif.jpwm|M04150_2.00.jpwm|FF|65	2	100	0.63	0.812217	3.1746	1.68674	0.0916532	2	GLI3_Hand2_second_motif	Hand2	FF	65	GLI3	Hand2	1
GLI3_Hand2_second_motif.jpwm|M04150_2.00.jpwm|FF|62	1	100	0.81	1.05117	1.23457	0.180752	0.856562	1	GLI3_Hand2_second_motif	Hand2	FF	62	GLI3	Hand2	1
GLI3_Hand2_second_motif.jpwm|M04150_2.00.jpwm|FF|60	2	100	0.73	0.897302	2.73973	1.41535	0.156965	2	GLI3_Hand2_second_motif	Hand2	FF	60	GLI3	Hand2	1
GLI3_Hand2_second_motif.jpwm|M04150_2.00.jpwm|FF|69	2	100	0.71	0.769297	2.8169	1.67686	0.0935708	2	GLI3_Hand2_second_motif	Hand2	FF	69	GLI3	Hand2	1
GLI3_Hand2_second_motif.jpwm|M04150_2.00.jpwm|FR|52	1	100	0.86	0.953674	1.16279	0.146801	0.883289	1	GLI3_Hand2_second_motif	Hand2	FR	52	GLI3	Hand2	1
GLI3_Hand2_second_motif.jpwm|M04150_2.00.jpwm|FR|50	1	100	0.89	0.983654	1.1236	0.111828	0.91096	1	GLI3_Hand2_second_motif	Hand2	FR	50	GLI3	Hand2	1
GLI3_Hand2_second_motif.jpwm|M04150_2.00.jpwm|FR|51	2	100	0.9	1	2.22222	1.1	0.271332	2	GLI3_Hand2_second_motif	Hand2	FR	51	GLI3	Hand2	1
GLI3_Hand2_second_motif.jpwm|M04150_2.00.jpwm|FR|56	1	100	0.84	0.861289	1.19048	0.185768	0.852627	1	GLI3_Hand2_second_motif	Hand2	FR	56	GLI3	Hand2	1
GLI3_Hand2_second_motif.jpwm|M04150_2.00.jpwm|FR|57	1	100	0.89	1.03372	1.1236	0.106411	0.915256	1	GLI3_Hand2_second_motif	Hand2	FR	57	GLI3	Hand2	1
GLI3_Hand2_second_motif.jpwm|M04150_2.00.jpwm|FR|54	1	100	0.69	0.774531	1.44928	0.400242	0.688978	1	GLI3_Hand2_second_motif	Hand2	FR	54	GLI3	Hand2	1
GLI3_Hand2_second_motif.jpwm|M04150_2.00.jpwm|FR|55	1	100	0.96	0.931166	1.04167	0.0429569	0.965736	1	GLI3_Hand2_second_motif	Hand2	FR	55	GLI3	Hand2	1
GLI3_Hand2_second_motif.jpwm|M04150_2.00.jpwm|FR|58	1	100	0.7	0.771984	1.42857	0.388609	0.697565	1	GLI3_Hand2_second_motif	Hand2	FR	58	GLI3	Hand2	1
GLI3_Hand2_second_motif.jpwm|M04150_2.00.jpwm|FR|59	1	100	1.06	0.993108	0.943396	-0.0604164	0.951824	1	GLI3_Hand2_second_motif	Hand2	FR	59	GLI3	Hand2	1
GLI3_Hand2_second_motif.jpwm|M04150_2.00.jpwm|FF|39	1	100	0.94	1.01325	1.06383	0.0592157	0.95278	1	GLI3_Hand2_second_motif	Hand2	FF	39	GLI3	Hand2	1
GLI3_Hand2_second_motif.jpwm|M04150_2.00.jpwm|RF|16	1	100	0.98	0.931817	1.02041	0.0214634	0.982876	1	GLI3_Hand2_second_motif	Hand2	RF	16	GLI3	Hand2	1
GLI3_Hand2_second_motif.jpwm|M04150_2.00.jpwm|RF|14	3	100	1.11	1.13614	2.7027	1.66353	0.0962061	3	GLI3_Hand2_second_motif	Hand2	RF	14	GLI3	Hand2	1
GLI3_Hand2_second_motif.jpwm|M04150_2.00.jpwm|RF|10	2	100	1	1.02494	2	0.975665	0.32923	2	GLI3_Hand2_second_motif	Hand2	RF	10	GLI3	Hand2	1
GLI3_Hand2_second_motif.jpwm|M04150_2.00.jpwm|RF|11	1	100	0.83	0.899551	1.20482	0.188983	0.850106	1	GLI3_Hand2_second_motif	Hand2	RF	11	GLI3	Hand2	1
GLI3_Hand2_second_motif.jpwm|M04150_2.00.jpwm|RF|18	1	100	0.91	0.865675	1.0989	0.103965	0.917197	1	GLI3_Hand2_second_motif	Hand2	RF	18	GLI3	Hand2	1
GLI3_Hand2_second_motif.jpwm|M04150_2.00.jpwm|FF|75	1	100	0.83	1.0736	1.20482	0.158345	0.874185	1	GLI3_Hand2_second_motif	Hand2	FF	75	GLI3	Hand2	1
GLI3_Hand2_second_motif.jpwm|M04150_2.00.jpwm|FF|70	1	100	0.76	0.88899	1.31579	0.269969	0.787184	1	GLI3_Hand2_second_motif	Hand2	FF	70	GLI3	Hand2	1
GLI3_Hand2_second_motif.jpwm|M04150_2.00.jpwm|FF|71	1	100	0.5	0.703526	2	0.710705	0.477267	1	GLI3_Hand2_second_motif	Hand2	FF	71	GLI3	Hand2	1
GLI3_Hand2_second_motif.jpwm|M04150_2.00.jpwm|FF|73	1	100	0.8	0.9101	1.25	0.219756	0.826061	1	GLI3_Hand2_second_motif	Hand2	FF	73	GLI3	Hand2	1
GLI3_Hand2_second_motif.jpwm|M04150_2.00.jpwm|FF|79	2	100	0.73	0.885974	2.73973	1.43345	0.151729	2	GLI3_Hand2_second_motif	Hand2	FF	79	GLI3	Hand2	1
GLI3_Hand2_second_motif.jpwm|M04150_2.00.jpwm|FR|27	1	100	0.86	0.829019	1.16279	0.168874	0.865896	1	GLI3_Hand2_second_motif	Hand2	FR	27	GLI3	Hand2	1
GLI3_Hand2_second_motif.jpwm|M04150_2.00.jpwm|FR|26	2	100	0.91	0.943826	2.1978	1.15487	0.248142	2	GLI3_Hand2_second_motif	Hand2	FR	26	GLI3	Hand2	1
GLI3_Hand2_second_motif.jpwm|M04150_2.00.jpwm|FR|25	1	100	1.1	1.08711	0.909091	-0.0919866	0.926709	1	GLI3_Hand2_second_motif	Hand2	FR	25	GLI3	Hand2	1
GLI3_Hand2_second_motif.jpwm|M04150_2.00.jpwm|FR|24	1	100	0.96	0.96316	1.04167	0.04153	0.966873	1	GLI3_Hand2_second_motif	Hand2	FR	24	GLI3	Hand2	1
GLI3_Hand2_second_motif.jpwm|M04150_2.00.jpwm|FR|22	3	100	0.7	0.731679	4.28571	3.14346	0.00166965	3	GLI3_Hand2_second_motif	Hand2	FR	22	GLI3	Hand2	1
GLI3_Hand2_second_motif.jpwm|M04150_2.00.jpwm|FR|21	2	100	0.91	0.975405	2.1978	1.11748	0.263787	2	GLI3_Hand2_second_motif	Hand2	FR	21	GLI3	Hand2	1
GLI3_Hand2_second_motif.jpwm|M04150_2.00.jpwm|FR|28	3	100	0.89	0.88643	3.37079	2.38034	0.0172969	3	GLI3_Hand2_second_motif	Hand2	FR	28	GLI3	Hand2	1
GLI3_Hand2_second_motif.jpwm|M04150_2.00.jpwm|FF|48	1	100	0.85	0.957427	1.17647	0.15667	0.875505	1	GLI3_Hand2_second_motif	Hand2	FF	48	GLI3	Hand2	1
GLI3_Hand2_second_motif.jpwm|M04150_2.00.jpwm|FF|41	2	100	0.72	0.792388	2.77778	1.61537	0.106231	2	GLI3_Hand2_second_motif	Hand2	FF	41	GLI3	Hand2	1
GLI3_Hand2_second_motif.jpwm|M04150_2.00.jpwm|FF|40	2	100	0.75	0.903137	2.66667	1.38406	0.166339	2	GLI3_Hand2_second_motif	Hand2	FF	40	GLI3	Hand2	1
GLI3_Hand2_second_motif.jpwm|M04150_2.00.jpwm|FF|42	1	100	0.74	0.860115	1.35135	0.302285	0.762435	1	GLI3_Hand2_second_motif	Hand2	FF	42	GLI3	Hand2	1
GLI3_Hand2_second_motif.jpwm|M04150_2.00.jpwm|FF|45	3	100	0.6	0.696311	5	3.44674	0.000567399	3	GLI3_Hand2_second_motif	Hand2	FF	45	GLI3	Hand2	1
GLI3_Hand2_second_motif.jpwm|M04150_2.00.jpwm|FF|44	1	100	0.76	0.81798	1.31579	0.293406	0.769212	1	GLI3_Hand2_second_motif	Hand2	FF	44	GLI3	Hand2	1
GLI3_Hand2_second_motif.jpwm|M04150_2.00.jpwm|FF|46	2	100	0.73	0.86287	2.73973	1.47183	0.141066	2	GLI3_Hand2_second_motif	Hand2	FF	46	GLI3	Hand2	1
GLI3_Hand2_second_motif.jpwm|M04150_2.00.jpwm|FF|21	1	100	0.83	0.829445	1.20482	0.204956	0.837606	1	GLI3_Hand2_second_motif	Hand2	FF	21	GLI3	Hand2	1
GLI3_Hand2_second_motif.jpwm|M04150_2.00.jpwm|FF|20	2	100	0.87	0.860526	2.29885	1.31315	0.189132	2	GLI3_Hand2_second_motif	Hand2	FF	20	GLI3	Hand2	1
GLI3_Hand2_second_motif.jpwm|M04150_2.00.jpwm|FR|34	1	100	0.88	1.07572	1.13636	0.111553	0.911178	1	GLI3_Hand2_second_motif	Hand2	FR	34	GLI3	Hand2	1
GLI3_Hand2_second_motif.jpwm|M04150_2.00.jpwm|FR|30	1	100	0.91	0.888706	1.0989	0.101271	0.919335	1	GLI3_Hand2_second_motif	Hand2	FR	30	GLI3	Hand2	1
GLI3_Hand2_second_motif.jpwm|M04150_2.00.jpwm|FR|31	2	100	0.97	0.936952	2.06186	1.09931	0.271633	2	GLI3_Hand2_second_motif	Hand2	FR	31	GLI3	Hand2	1
GLI3_Hand2_second_motif.jpwm|M04150_2.00.jpwm|FR|32	1	100	0.92	0.917617	1.08696	0.0871824	0.930527	1	GLI3_Hand2_second_motif	Hand2	FR	32	GLI3	Hand2	1
GLI3_Hand2_second_motif.jpwm|M04150_2.00.jpwm|FR|33	1	100	0.74	0.773553	1.35135	0.336112	0.736787	1	GLI3_Hand2_second_motif	Hand2	FR	33	GLI3	Hand2	1
GLI3_Hand2_second_motif.jpwm|M04150_2.00.jpwm|FR|38	1	100	1.05	0.914253	0.952381	-0.0546895	0.956386	1	GLI3_Hand2_second_motif	Hand2	FR	38	GLI3	Hand2	1
GLI3_Hand2_second_motif.jpwm|M04150_2.00.jpwm|FR|39	1	100	0.86	0.887853	1.16279	0.157684	0.874706	1	GLI3_Hand2_second_motif	Hand2	FR	39	GLI3	Hand2	1
GLI3_Hand2_second_motif.jpwm|M04150_2.00.jpwm|FF|56	1	100	0.91	0.922174	1.0989	0.0975955	0.922253	1	GLI3_Hand2_second_motif	Hand2	FF	56	GLI3	Hand2	1
GLI3_Hand2_second_motif.jpwm|M04150_2.00.jpwm|FF|57	4	100	0.9	0.858705	4.44444	3.61009	0.000306092	4	GLI3_Hand2_second_motif	Hand2	FF	57	GLI3	Hand2	1
GLI3_Hand2_second_motif.jpwm|M04150_2.00.jpwm|FF|54	1	100	0.87	0.928287	1.14943	0.140043	0.888626	1	GLI3_Hand2_second_motif	Hand2	FF	54	GLI3	Hand2	1
GLI3_Hand2_second_motif.jpwm|M04150_2.00.jpwm|RF|23	1	100	1.04	1.19697	0.961538	-0.0334178	0.973341	1	GLI3_Hand2_second_motif	Hand2	RF	23	GLI3	Hand2	1
GLI3_Hand2_second_motif.jpwm|M04150_2.00.jpwm|RF|22	1	100	0.99	0.904478	1.0101	0.0110561	0.991179	1	GLI3_Hand2_second_motif	Hand2	RF	22	GLI3	Hand2	1
GLI3_Hand2_second_motif.jpwm|M04150_2.00.jpwm|FF|85	1	100	0.84	0.872938	1.19048	0.183289	0.854571	1	GLI3_Hand2_second_motif	Hand2	FF	85	GLI3	Hand2	1
GLI3_Hand2_second_motif.jpwm|M04150_2.00.jpwm|FF|84	1	100	0.72	0.805035	1.38889	0.347811	0.727982	1	GLI3_Hand2_second_motif	Hand2	FF	84	GLI3	Hand2	1
GLI3_Hand2_second_motif.jpwm|M04150_2.00.jpwm|FF|81	1	100	0.75	0.880484	1.33333	0.283935	0.77646	1	GLI3_Hand2_second_motif	Hand2	FF	81	GLI3	Hand2	1
GLI3_Hand2_second_motif.jpwm|M04150_2.00.jpwm|FF|80	1	100	0.69	0.82505	1.44928	0.375735	0.707114	1	GLI3_Hand2_second_motif	Hand2	FF	80	GLI3	Hand2	1
GLI3_Hand2_second_motif.jpwm|M04150_2.00.jpwm|FF|82	1	100	0.74	0.860115	1.35135	0.302285	0.762435	1	GLI3_Hand2_second_motif	Hand2	FF	82	GLI3	Hand2	1
GLI3_Hand2_second_motif.jpwm|M04150_2.00.jpwm|FF|88	1	100	0.74	0.949428	1.35135	0.273849	0.784201	1	GLI3_Hand2_second_motif	Hand2	FF	88	GLI3	Hand2	1
GLI3_Hand2_second_motif.jpwm|M04150_2.00.jpwm|FR|18	1	100	0.77	0.941254	1.2987	0.244355	0.806956	1	GLI3_Hand2_second_motif	Hand2	FR	18	GLI3	Hand2	1
GLI3_Hand2_second_motif.jpwm|M04150_2.00.jpwm|FR|19	1	100	0.88	0.755853	1.13636	0.158761	0.873857	1	GLI3_Hand2_second_motif	Hand2	FR	19	GLI3	Hand2	1
GLI3_Hand2_second_motif.jpwm|M04150_2.00.jpwm|FR|16	3	100	1.22	1.11537	2.45902	1.59589	0.110514	3	GLI3_Hand2_second_motif	Hand2	FR	16	GLI3	Hand2	1
GLI3_Hand2_second_motif.jpwm|M04150_2.00.jpwm|FR|17	3	100	0.87	1.03138	3.44828	2.0652	0.038904	3	GLI3_Hand2_second_motif	Hand2	FR	17	GLI3	Hand2	1
GLI3_Hand2_second_motif.jpwm|M04150_2.00.jpwm|FR|15	2	100	0.88	0.856113	2.27273	1.30824	0.190792	2	GLI3_Hand2_second_motif	Hand2	FR	15	GLI3	Hand2	1
GLI3_Hand2_second_motif.jpwm|M04150_2.00.jpwm|FR|12	1	100	1.04	0.77746	0.961538	-0.0514496	0.958967	1	GLI3_Hand2_second_motif	Hand2	FR	12	GLI3	Hand2	1
GLI3_Hand2_second_motif.jpwm|M04150_2.00.jpwm|FR|13	2	100	1.02	1.09157	1.96078	0.897793	0.369296	2	GLI3_Hand2_second_motif	Hand2	FR	13	GLI3	Hand2	1
GLI3_Hand2_second_motif.jpwm|M04150_2.00.jpwm|FR|10	1	100	1.09	1.14676	0.917431	-0.0784822	0.937444	1	GLI3_Hand2_second_motif	Hand2	FR	10	GLI3	Hand2	1
GLI3_Hand2_second_motif.jpwm|M04150_2.00.jpwm|FF|53	2	100	0.81	0.837203	2.46914	1.4214	0.155201	2	GLI3_Hand2_second_motif	Hand2	FF	53	GLI3	Hand2	1
GLI3_Hand2_second_motif.jpwm|M04150_2.00.jpwm|RF|41	9	100	0.87	0.939106	10.3448	8.65717	4.83604e-18	9	GLI3_Hand2_second_motif	Hand2	RF	41	GLI3	Hand2	1
GLI3_Hand2_second_motif.jpwm|M04150_2.00.jpwm|FF|99	1	100	0.63	0.760847	1.5873	0.4863	0.626755	1	GLI3_Hand2_second_motif	Hand2	FF	99	GLI3	Hand2	1
GLI3_Hand2_second_motif.jpwm|M04150_2.00.jpwm|FF|92	1	100	0.6	0.765414	1.66667	0.522593	0.601258	1	GLI3_Hand2_second_motif	Hand2	FF	92	GLI3	Hand2	1
GLI3_Hand2_second_motif.jpwm|M04150_2.00.jpwm|FF|94	1	100	0.62	0.678382	1.6129	0.560156	0.575373	1	GLI3_Hand2_second_motif	Hand2	FF	94	GLI3	Hand2	1
GLI3_Hand2_second_motif.jpwm|M04150_2.00.jpwm|FF|22	1	100	0.72	0.922009	1.38889	0.303685	0.761368	1	GLI3_Hand2_second_motif	Hand2	FF	22	GLI3	Hand2	1
GLI3_Hand2_second_motif.jpwm|M04150_2.00.jpwm|FF|27	1	100	0.73	0.827006	1.36986	0.326479	0.744062	1	GLI3_Hand2_second_motif	Hand2	FF	27	GLI3	Hand2	1
GLI3_Hand2_second_motif.jpwm|M04150_2.00.jpwm|RF|86	1	100	0.65	0.845368	1.53846	0.414021	0.678859	1	GLI3_Hand2_second_motif	Hand2	RF	86	GLI3	Hand2	1
GLI3_Hand2_second_motif.jpwm|M04150_2.00.jpwm|RF|-2	4	100	3.61	1.99441	1.10803	0.195546	0.844965	3	GLI3_Hand2_second_motif	Hand2	RF	-2	GLI3	Hand2	1
GLI3_Hand2_second_motif.jpwm|M04150_2.00.jpwm|RF|65	1	100	0.74	0.824131	1.35135	0.315484	0.752394	1	GLI3_Hand2_second_motif	Hand2	RF	65	GLI3	Hand2	1
GLI3_Hand2_second_motif.jpwm|M04150_2.00.jpwm|FF|-3	1	100	0.78	0.894201	1.28205	0.24603	0.805659	1	GLI3_Hand2_second_motif	Hand2	FF	-3	GLI3	Hand2	1
GLI3_Hand2_second_motif.jpwm|M04150_2.00.jpwm|FF|-1	2	100	0.78	0.938298	2.5641	1.30023	0.193524	2	GLI3_Hand2_second_motif	Hand2	FF	-1	GLI3	Hand2	1
GLI3_Hand2_second_motif.jpwm|M04150_2.00.jpwm|RF|88	2	100	0.87	1.03138	2.29885	1.09562	0.273244	2	GLI3_Hand2_second_motif	Hand2	RF	88	GLI3	Hand2	1
GLI3_Hand2_second_motif.jpwm|M04150_2.00.jpwm|RF|81	2	100	0.84	0.895781	2.38095	1.29496	0.195334	2	GLI3_Hand2_second_motif	Hand2	RF	81	GLI3	Hand2	1
GLI3_Hand2_second_motif.jpwm|M04150_2.00.jpwm|RF|83	2	100	0.89	0.851558	2.24719	1.30349	0.192407	2	GLI3_Hand2_second_motif	Hand2	RF	83	GLI3	Hand2	1
GLI3_Hand2_second_motif.jpwm|M04150_2.00.jpwm|RF|82	1	100	0.85	0.957427	1.17647	0.15667	0.875505	1	GLI3_Hand2_second_motif	Hand2	RF	82	GLI3	Hand2	1
GLI3_Hand2_second_motif.jpwm|M04150_2.00.jpwm|RF|62	4	100	1.03	0.958271	3.8835	3.09933	0.00193957	4	GLI3_Hand2_second_motif	Hand2	RF	62	GLI3	Hand2	1
GLI3_Hand2_second_motif.jpwm|M04150_2.00.jpwm|RF|61	3	100	0.89	0.941683	3.37079	2.24067	0.0250476	3	GLI3_Hand2_second_motif	Hand2	RF	61	GLI3	Hand2	1
GLI3_Hand2_second_motif.jpwm|M04150_2.00.jpwm|RF|60	2	100	1.03	1.04886	1.94175	0.924816	0.355061	2	GLI3_Hand2_second_motif	Hand2	RF	60	GLI3	Hand2	1
GLI3_Hand2_second_motif.jpwm|M04150_2.00.jpwm|RF|67	2	100	0.86	0.85304	2.32558	1.3364	0.181419	2	GLI3_Hand2_second_motif	Hand2	RF	67	GLI3	Hand2	1
GLI3_Hand2_second_motif.jpwm|M04150_2.00.jpwm|RF|66	1	100	0.96	0.886715	1.04167	0.0451103	0.964019	1	GLI3_Hand2_second_motif	Hand2	RF	66	GLI3	Hand2	1
GLI3_Hand2_second_motif.jpwm|M04150_2.00.jpwm|RF|68	1	100	0.86	0.887853	1.16279	0.157684	0.874706	1	GLI3_Hand2_second_motif	Hand2	RF	68	GLI3	Hand2	1
GLI3_Hand2_second_motif.jpwm|M04150_2.00.jpwm|FR|-2	2	100	1.39	1.29408	1.43885	0.471377	0.637372	2	GLI3_Hand2_second_motif	Hand2	FR	-2	GLI3	Hand2	1
GLI3_Hand2_second_motif.jpwm|M04150_2.00.jpwm|RF|32	2	100	0.94	1.01325	2.12766	1.04614	0.295495	2	GLI3_Hand2_second_motif	Hand2	RF	32	GLI3	Hand2	1
GLI3_Hand2_second_motif.jpwm|M04150_2.00.jpwm|RF|98	1	100	0.77	0.930461	1.2987	0.247189	0.804762	1	GLI3_Hand2_second_motif	Hand2	RF	98	GLI3	Hand2	1
GLI3_Hand2_second_motif.jpwm|M04150_2.00.jpwm|RF|96	1	100	0.92	0.872475	1.08696	0.0916932	0.926942	1	GLI3_Hand2_second_motif	Hand2	RF	96	GLI3	Hand2	1
GLI3_Hand2_second_motif.jpwm|M04150_2.00.jpwm|RF|97	1	100	0.75	0.946818	1.33333	0.264042	0.791747	1	GLI3_Hand2_second_motif	Hand2	RF	97	GLI3	Hand2	1
GLI3_Hand2_second_motif.jpwm|M04150_2.00.jpwm|RF|95	2	100	0.83	0.943398	2.40964	1.2402	0.214902	2	GLI3_Hand2_second_motif	Hand2	RF	95	GLI3	Hand2	1
GLI3_Hand2_second_motif.jpwm|M04150_2.00.jpwm|RF|92	1	100	0.71	0.807728	1.40845	0.359032	0.719571	1	GLI3_Hand2_second_motif	Hand2	RF	92	GLI3	Hand2	1
GLI3_Hand2_second_motif.jpwm|M04150_2.00.jpwm|RF|70	1	100	0.87	1.09779	1.14943	0.118419	0.905735	1	GLI3_Hand2_second_motif	Hand2	RF	70	GLI3	Hand2	1
GLI3_Hand2_second_motif.jpwm|M04150_2.00.jpwm|RF|72	1	100	0.59	0.683056	1.69492	0.600244	0.548344	1	GLI3_Hand2_second_motif	Hand2	RF	72	GLI3	Hand2	1
GLI3_Hand2_second_motif.jpwm|M04150_2.00.jpwm|RF|73	2	100	0.77	0.827006	2.5974	1.48729	0.136938	2	GLI3_Hand2_second_motif	Hand2	RF	73	GLI3	Hand2	1
GLI3_Hand2_second_motif.jpwm|M04150_2.00.jpwm|RF|74	1	100	0.78	0.871316	1.28205	0.252492	0.800661	1	GLI3_Hand2_second_motif	Hand2	RF	74	GLI3	Hand2	1
GLI3_Hand2_second_motif.jpwm|M04150_2.00.jpwm|RF|75	1	100	0.83	1.00559	1.20482	0.169055	0.865753	1	GLI3_Hand2_second_motif	Hand2	RF	75	GLI3	Hand2	1
GLI3_Hand2_second_motif.jpwm|M04150_2.00.jpwm|RF|77	1	100	0.79	0.879566	1.26582	0.238754	0.811296	1	GLI3_Hand2_second_motif	Hand2	RF	77	GLI3	Hand2	1
GLI3_Hand2_second_motif.jpwm|M04150_2.00.jpwm|FF|15	2	100	0.73	0.827006	2.73973	1.53566	0.124622	2	GLI3_Hand2_second_motif	Hand2	FF	15	GLI3	Hand2	1
GLI3_Hand2_second_motif.jpwm|M04150_2.00.jpwm|FF|19	1	100	0.89	0.973331	1.1236	0.113014	0.91002	1	GLI3_Hand2_second_motif	Hand2	FF	19	GLI3	Hand2	1
GLI3_Hand2_second_motif.jpwm|M04150_2.00.jpwm|FR|80	2	100	0.74	0.84829	2.7027	1.48534	0.137453	2	GLI3_Hand2_second_motif	Hand2	FR	80	GLI3	Hand2	1
GLI3_Hand2_second_motif.jpwm|M04150_2.00.jpwm|FR|83	1	100	0.69	0.906709	1.44928	0.341896	0.732429	1	GLI3_Hand2_second_motif	Hand2	FR	83	GLI3	Hand2	1
GLI3_Hand2_second_motif.jpwm|M04150_2.00.jpwm|FR|84	1	100	0.83	0.853454	1.20482	0.199191	0.842114	1	GLI3_Hand2_second_motif	Hand2	FR	84	GLI3	Hand2	1
GLI3_Hand2_second_motif.jpwm|M04150_2.00.jpwm|FR|87	1	100	0.85	0.880484	1.17647	0.170361	0.864726	1	GLI3_Hand2_second_motif	Hand2	FR	87	GLI3	Hand2	1
GLI3_Hand2_second_motif.jpwm|M04150_2.00.jpwm|FR|89	1	100	0.78	0.916515	1.28205	0.24004	0.810299	1	GLI3_Hand2_second_motif	Hand2	FR	89	GLI3	Hand2	1
GLI3_Hand2_second_motif.jpwm|M04150_2.00.jpwm|FR|88	2	100	0.85	0.891883	2.35294	1.28941	0.197256	2	GLI3_Hand2_second_motif	Hand2	FR	88	GLI3	Hand2	1
GLI3_Hand2_second_motif.jpwm|M04150_2.00.jpwm|RF|47	2	100	0.99	0.979538	2.0202	1.0311	0.302495	2	GLI3_Hand2_second_motif	Hand2	RF	47	GLI3	Hand2	1
GLI3_Hand2_second_motif.jpwm|M04150_2.00.jpwm|RF|40	1	100	0.83	0.853454	1.20482	0.199191	0.842114	1	GLI3_Hand2_second_motif	Hand2	RF	40	GLI3	Hand2	1
GLI3_Hand2_second_motif.jpwm|M04150_2.00.jpwm|RF|43	2	100	0.96	0.994124	2.08333	1.04615	0.295493	2	GLI3_Hand2_second_motif	Hand2	RF	43	GLI3	Hand2	1
GLI3_Hand2_second_motif.jpwm|M04150_2.00.jpwm|FF|28	1	100	0.71	0.844411	1.40845	0.343435	0.731272	1	GLI3_Hand2_second_motif	Hand2	FF	28	GLI3	Hand2	1
GLI3_Hand2_second_motif.jpwm|M04150_2.00.jpwm|FF|25	1	100	0.86	0.816744	1.16279	0.171412	0.8639	1	GLI3_Hand2_second_motif	Hand2	FF	25	GLI3	Hand2	1
GLI3_Hand2_second_motif.jpwm|M04150_2.00.jpwm|FR|94	1	100	0.78	0.894201	1.28205	0.24603	0.805659	1	GLI3_Hand2_second_motif	Hand2	FR	94	GLI3	Hand2	1
GLI3_Hand2_second_motif.jpwm|M04150_2.00.jpwm|FR|95	1	100	0.8	0.840875	1.25	0.237847	0.811999	1	GLI3_Hand2_second_motif	Hand2	FR	95	GLI3	Hand2	1
GLI3_Hand2_second_motif.jpwm|M04150_2.00.jpwm|RF|59	2	100	0.89	0.897753	2.24719	1.23642	0.216302	2	GLI3_Hand2_second_motif	Hand2	RF	59	GLI3	Hand2	1
GLI3_Hand2_second_motif.jpwm|M04150_2.00.jpwm|RF|58	1	100	0.78	0.835814	1.28205	0.263216	0.792384	1	GLI3_Hand2_second_motif	Hand2	RF	58	GLI3	Hand2	1
GLI3_Hand2_second_motif.jpwm|M04150_2.00.jpwm|RF|52	1	100	0.86	0.804281	1.16279	0.174068	0.861812	1	GLI3_Hand2_second_motif	Hand2	RF	52	GLI3	Hand2	1
GLI3_Hand2_second_motif.jpwm|M04150_2.00.jpwm|RF|53	9	100	1.01	0.915578	8.91089	8.72673	2.62144e-18	9	GLI3_Hand2_second_motif	Hand2	RF	53	GLI3	Hand2	1
GLI3_Hand2_second_motif.jpwm|M04150_2.00.jpwm|RF|50	1	100	0.94	0.951554	1.06383	0.0630548	0.949723	1	GLI3_Hand2_second_motif	Hand2	RF	50	GLI3	Hand2	1
GLI3_Hand2_second_motif.jpwm|M04150_2.00.jpwm|RF|51	2	100	1.03	1.16736	1.94175	0.830935	0.40601	2	GLI3_Hand2_second_motif	Hand2	RF	51	GLI3	Hand2	1
GLI3_Hand2_second_motif.jpwm|M04150_2.00.jpwm|RF|56	1	100	0.77	0.86287	1.2987	0.266552	0.789814	1	GLI3_Hand2_second_motif	Hand2	RF	56	GLI3	Hand2	1
GLI3_Hand2_second_motif.jpwm|M04150_2.00.jpwm|RF|57	1	100	0.72	0.817486	1.38889	0.342514	0.731964	1	GLI3_Hand2_second_motif	Hand2	RF	57	GLI3	Hand2	1
GLI3_Hand2_second_motif.jpwm|M04150_2.00.jpwm|RF|54	2	100	0.83	0.943398	2.40964	1.2402	0.214902	2	GLI3_Hand2_second_motif	Hand2	RF	54	GLI3	Hand2	1
GLI3_Hand2_second_motif.jpwm|M04150_2.00.jpwm|RF|55	2	100	0.76	0.830237	2.63158	1.49355	0.135293	2	GLI3_Hand2_second_motif	Hand2	RF	55	GLI3	Hand2	1
GLI3_Hand2_third_motif.jpwm|M04150_2.00.jpwm|FR|100	1	100	0.2	0.512471	5	1.56106	0.118508	1	GLI3_Hand2_third_motif	Hand2	FR	100	GLI3	Hand2	1
GLI3_Hand2_third_motif.jpwm|M04150_2.00.jpwm|RF|6	2	100	0.25	0.51981	8	3.36662	0.000760962	2	GLI3_Hand2_third_motif	Hand2	RF	6	GLI3	Hand2	1
GLI3_Hand2_third_motif.jpwm|M04150_2.00.jpwm|FF|24	2	100	0.37	0.597216	5.40541	2.72933	0.00634628	2	GLI3_Hand2_third_motif	Hand2	FF	24	GLI3	Hand2	1
GLI3_Hand2_third_motif.jpwm|M04150_2.00.jpwm|FF|27	2	100	0.33	0.55149	6.06061	3.02816	0.00246049	2	GLI3_Hand2_third_motif	Hand2	FF	27	GLI3	Hand2	1
GLI3_Hand2_third_motif.jpwm|M04150_2.00.jpwm|FF|21	1	100	0.23	0.468287	4.34783	1.64429	0.100116	1	GLI3_Hand2_third_motif	Hand2	FF	21	GLI3	Hand2	1
GLI3_Hand2_third_motif.jpwm|M04150_2.00.jpwm|RF|11	1	100	0.28	0.514045	3.57143	1.40066	0.161317	1	GLI3_Hand2_third_motif	Hand2	RF	11	GLI3	Hand2	1
GLI3_Hand2_third_motif.jpwm|M04150_2.00.jpwm|FF|29	1	100	0.3	0.541229	3.33333	1.29335	0.195889	1	GLI3_Hand2_third_motif	Hand2	FF	29	GLI3	Hand2	1
GLI3_Hand2_third_motif.jpwm|M04150_2.00.jpwm|FF|28	1	100	0.29	0.518253	3.44828	1.36999	0.170691	1	GLI3_Hand2_third_motif	Hand2	FF	28	GLI3	Hand2	1
GLI3_Hand2_third_motif.jpwm|M04150_2.00.jpwm|FR|-6	6	100	6.83	2.87116	0.878477	-0.289082	0.772518	6	GLI3_Hand2_third_motif	Hand2	FR	-6	GLI3	Hand2	1
GLI3_Hand2_third_motif.jpwm|M04150_2.00.jpwm|FF|13	1	100	0.36	0.541603	2.77778	1.18168	0.237333	1	GLI3_Hand2_third_motif	Hand2	FF	13	GLI3	Hand2	1
GLI3_Hand2_third_motif.jpwm|M04150_2.00.jpwm|FF|18	2	100	0.34	0.496859	5.88235	3.34099	0.000834804	2	GLI3_Hand2_third_motif	Hand2	FF	18	GLI3	Hand2	1
GLI3_Hand2_third_motif.jpwm|M04150_2.00.jpwm|FF|16	1	100	0.32	0.566399	3.125	1.20057	0.229919	1	GLI3_Hand2_third_motif	Hand2	FF	16	GLI3	Hand2	1
GLI3_Hand2_third_motif.jpwm|M04150_2.00.jpwm|RF|78	1	100	0.17	0.472582	5.88235	1.75631	0.0790354	1	GLI3_Hand2_third_motif	Hand2	RF	78	GLI3	Hand2	1
GLI3_Hand2_third_motif.jpwm|M04150_2.00.jpwm|RF|79	1	100	0.23	0.489382	4.34783	1.57341	0.115623	1	GLI3_Hand2_third_motif	Hand2	RF	79	GLI3	Hand2	1
GLI3_Hand2_third_motif.jpwm|M04150_2.00.jpwm|RF|76	1	100	0.26	0.524549	3.84615	1.41074	0.158322	1	GLI3_Hand2_third_motif	Hand2	RF	76	GLI3	Hand2	1
GLI3_Hand2_third_motif.jpwm|M04150_2.00.jpwm|RF|74	1	100	0.29	0.591096	3.44828	1.20116	0.229689	1	GLI3_Hand2_third_motif	Hand2	RF	74	GLI3	Hand2	1
GLI3_Hand2_third_motif.jpwm|M04150_2.00.jpwm|RF|72	1	100	0.31	0.506423	3.22581	1.3625	0.173041	1	GLI3_Hand2_third_motif	Hand2	RF	72	GLI3	Hand2	1
GLI3_Hand2_third_motif.jpwm|M04150_2.00.jpwm|RF|73	1	100	0.18	0.386123	5.55556	2.12368	0.0336972	1	GLI3_Hand2_third_motif	Hand2	RF	73	GLI3	Hand2	1
GLI3_Hand2_third_motif.jpwm|M04150_2.00.jpwm|RF|71	2	100	0.27	0.489382	7.40741	3.53507	0.000407668	2	GLI3_Hand2_third_motif	Hand2	RF	71	GLI3	Hand2	1
GLI3_Hand2_third_motif.jpwm|M04150_2.00.jpwm|RF|84	1	100	0.21	0.477684	4.7619	1.65381	0.0981654	1	GLI3_Hand2_third_motif	Hand2	RF	84	GLI3	Hand2	1
GLI3_Hand2_third_motif.jpwm|M04150_2.00.jpwm|RF|46	3	100	0.14	0.376588	21.4286	7.59452	3.08946e-14	3	GLI3_Hand2_third_motif	Hand2	RF	46	GLI3	Hand2	1
GLI3_Hand2_third_motif.jpwm|M04150_2.00.jpwm|RF|65	1	100	0.2	0.492366	5	1.62481	0.104204	1	GLI3_Hand2_third_motif	Hand2	RF	65	GLI3	Hand2	1
GLI3_Hand2_third_motif.jpwm|M04150_2.00.jpwm|RF|66	1	100	0.22	0.416333	4.54545	1.8735	0.0609995	1	GLI3_Hand2_third_motif	Hand2	RF	66	GLI3	Hand2	1
GLI3_Hand2_third_motif.jpwm|M04150_2.00.jpwm|FR|39	1	100	0.3	0.541229	3.33333	1.29335	0.195889	1	GLI3_Hand2_third_motif	Hand2	FR	39	GLI3	Hand2	1
GLI3_Hand2_third_motif.jpwm|M04150_2.00.jpwm|FR|32	1	100	0.19	0.419114	5.26316	1.93265	0.0532795	1	GLI3_Hand2_third_motif	Hand2	FR	32	GLI3	Hand2	1
GLI3_Hand2_third_motif.jpwm|M04150_2.00.jpwm|FR|34	1	100	0.28	0.494004	3.57143	1.45748	0.144985	1	GLI3_Hand2_third_motif	Hand2	FR	34	GLI3	Hand2	1
GLI3_Hand2_third_motif.jpwm|M04150_2.00.jpwm|RF|52	1	100	0.22	0.462317	4.54545	1.68715	0.091574	1	GLI3_Hand2_third_motif	Hand2	RF	52	GLI3	Hand2	1
GLI3_Hand2_third_motif.jpwm|M04150_2.00.jpwm|RF|55	1	100	0.33	0.569512	3.0303	1.17645	0.239416	1	GLI3_Hand2_third_motif	Hand2	RF	55	GLI3	Hand2	1
GLI3_Hand2_third_motif.jpwm|M04150_2.00.jpwm|RF|56	1	100	0.23	0.509605	4.34783	1.51098	0.130795	1	GLI3_Hand2_third_motif	Hand2	RF	56	GLI3	Hand2	1
GLI3_Hand2_third_motif.jpwm|M04150_2.00.jpwm|RF|59	3	100	0.21	0.498381	14.2857	5.59812	2.16683e-08	3	GLI3_Hand2_third_motif	Hand2	RF	59	GLI3	Hand2	1
GLI3_Hand2_third_motif.jpwm|M04150_2.00.jpwm|RF|10	1	100	0.28	0.533333	3.57143	1.35	0.177016	1	GLI3_Hand2_third_motif	Hand2	RF	10	GLI3	Hand2	1
GLI3_Hand2_third_motif.jpwm|M04150_2.00.jpwm|FF|20	1	100	0.32	0.583961	3.125	1.16446	0.244237	1	GLI3_Hand2_third_motif	Hand2	FF	20	GLI3	Hand2	1
GLI3_Hand2_third_motif.jpwm|M04150_2.00.jpwm|FF|23	1	100	0.24	0.514831	4.16667	1.47621	0.139886	1	GLI3_Hand2_third_motif	Hand2	FF	23	GLI3	Hand2	1
GLI3_Hand2_third_motif.jpwm|M04150_2.00.jpwm|RF|18	1	100	0.31	0.525991	3.22581	1.31181	0.189585	1	GLI3_Hand2_third_motif	Hand2	RF	18	GLI3	Hand2	1
GLI3_Hand2_third_motif.jpwm|M04150_2.00.jpwm|RF|19	1	100	0.4	0.651339	2.5	0.921179	0.356957	1	GLI3_Hand2_third_motif	Hand2	RF	19	GLI3	Hand2	1
GLI3_Hand2_third_motif.jpwm|M04150_2.00.jpwm|FR|21	2	100	0.22	0.483673	9.09091	3.68017	0.000233075	2	GLI3_Hand2_third_motif	Hand2	FR	21	GLI3	Hand2	1
GLI3_Hand2_third_motif.jpwm|M04150_2.00.jpwm|FR|24	1	100	0.26	0.484507	3.84615	1.52732	0.12668	1	GLI3_Hand2_third_motif	Hand2	FR	24	GLI3	Hand2	1
GLI3_Hand2_third_motif.jpwm|M04150_2.00.jpwm|FR|27	1	100	0.24	0.452155	4.16667	1.68084	0.0927943	1	GLI3_Hand2_third_motif	Hand2	FR	27	GLI3	Hand2	1
GLI3_Hand2_third_motif.jpwm|M04150_2.00.jpwm|FR|26	1	100	0.18	0.386123	5.55556	2.12368	0.0336972	1	GLI3_Hand2_third_motif	Hand2	FR	26	GLI3	Hand2	1
GLI3_Hand2_third_motif.jpwm|M04150_2.00.jpwm|RF|47	2	100	0.2	0.471405	10	3.81838	0.000134333	2	GLI3_Hand2_third_motif	Hand2	RF	47	GLI3	Hand2	1
GLI3_Hand2_third_motif.jpwm|M04150_2.00.jpwm|FF|-5	8	100	13.15	3.80158	0.608365	-1.3547	0.175513	8	GLI3_Hand2_third_motif	Hand2	FF	-5	GLI3	Hand2	1
GLI3_Hand2_third_motif.jpwm|M04150_2.00.jpwm|RF|42	1	100	0.3	0.559581	3.33333	1.25094	0.210958	1	GLI3_Hand2_third_motif	Hand2	RF	42	GLI3	Hand2	1
GLI3_Hand2_third_motif.jpwm|M04150_2.00.jpwm|RF|41	1	100	0.2	0.426401	5	1.87617	0.0606324	1	GLI3_Hand2_third_motif	Hand2	RF	41	GLI3	Hand2	1
GLI3_Hand2_third_motif.jpwm|M04150_2.00.jpwm|FF|-3	1	100	1.31	1.19507	0.763359	-0.2594	0.795327	1	GLI3_Hand2_third_motif	Hand2	FF	-3	GLI3	Hand2	1
GLI3_Hand2_third_motif.jpwm|M04150_2.00.jpwm|RF|49	1	100	0.29	0.498381	3.44828	1.42461	0.154269	1	GLI3_Hand2_third_motif	Hand2	RF	49	GLI3	Hand2	1
GLI3_Hand2_third_motif.jpwm|M04150_2.00.jpwm|FR|12	2	100	0.39	0.617833	5.12821	2.60588	0.00916376	2	GLI3_Hand2_third_motif	Hand2	FR	12	GLI3	Hand2	1
GLI3_Hand2_third_motif.jpwm|M04150_2.00.jpwm|FR|93	1	100	0.23	0.509605	4.34783	1.51098	0.130795	1	GLI3_Hand2_third_motif	Hand2	FR	93	GLI3	Hand2	1
GLI3_Hand2_third_motif.jpwm|M04150_2.00.jpwm|FF|-2	2	100	0.54	0.702377	3.7037	2.07866	0.037649	2	GLI3_Hand2_third_motif	Hand2	FF	-2	GLI3	Hand2	1
GLI3_Hand2_third_motif.jpwm|M04150_2.00.jpwm|FF|47	1	100	0.26	0.524549	3.84615	1.41074	0.158322	1	GLI3_Hand2_third_motif	Hand2	FF	47	GLI3	Hand2	1
GLI3_Hand2_third_motif.jpwm|M04150_2.00.jpwm|FF|46	1	100	0.34	0.623123	2.94118	1.05918	0.289518	1	GLI3_Hand2_third_motif	Hand2	FF	46	GLI3	Hand2	1
GLI3_Hand2_third_motif.jpwm|M04150_2.00.jpwm|FF|48	1	100	0.19	0.394277	5.26316	2.05439	0.0399378	1	GLI3_Hand2_third_motif	Hand2	FF	48	GLI3	Hand2	1
GLI3_Hand2_third_motif.jpwm|M04150_2.00.jpwm|FF|92	1	100	0.16	0.368453	6.25	2.2798	0.0226194	1	GLI3_Hand2_third_motif	Hand2	FF	92	GLI3	Hand2	1
GLI3_Hand2_third_motif.jpwm|M04150_2.00.jpwm|FF|99	1	100	0.32	0.566399	3.125	1.20057	0.229919	1	GLI3_Hand2_third_motif	Hand2	FF	99	GLI3	Hand2	1
GLI3_Hand2_third_motif.jpwm|M04150_2.00.jpwm|FR|76	1	100	0.21	0.433333	4.7619	1.82308	0.0682917	1	GLI3_Hand2_third_motif	Hand2	FR	76	GLI3	Hand2	1
GLI3_Hand2_third_motif.jpwm|M04150_2.00.jpwm|FR|71	1	100	0.23	0.468287	4.34783	1.64429	0.100116	1	GLI3_Hand2_third_motif	Hand2	FR	71	GLI3	Hand2	1
GLI3_Hand2_third_motif.jpwm|M04150_2.00.jpwm|RF|99	1	100	0.16	0.486588	6.25	1.72631	0.0842922	1	GLI3_Hand2_third_motif	Hand2	RF	99	GLI3	Hand2	1
GLI3_Hand2_third_motif.jpwm|M04150_2.00.jpwm|RF|97	2	100	0.18	0.411452	11.1111	4.42336	9.7179e-06	2	GLI3_Hand2_third_motif	Hand2	RF	97	GLI3	Hand2	1
GLI3_Hand2_third_motif.jpwm|M04150_2.00.jpwm|FR|66	1	100	0.19	0.442559	5.26316	1.83026	0.0672105	1	GLI3_Hand2_third_motif	Hand2	FR	66	GLI3	Hand2	1
GLI3_Hand2_third_motif.jpwm|M04150_2.00.jpwm|FR|62	1	100	0.24	0.514831	4.16667	1.47621	0.139886	1	GLI3_Hand2_third_motif	Hand2	FR	62	GLI3	Hand2	1
GLI3_Hand2_third_motif.jpwm|M04150_2.00.jpwm|RF|88	1	100	0.2	0.471405	5	1.69706	0.089686	1	GLI3_Hand2_third_motif	Hand2	RF	88	GLI3	Hand2	1
GLI3_Hand2_third_motif.jpwm|M04150_2.00.jpwm|FF|78	1	100	0.31	0.544857	3.22581	1.26639	0.205374	1	GLI3_Hand2_third_motif	Hand2	FF	78	GLI3	Hand2	1
GLI3_Hand2_third_motif.jpwm|M04150_2.00.jpwm|FF|72	1	100	0.22	0.439927	4.54545	1.77302	0.0762248	1	GLI3_Hand2_third_motif	Hand2	FF	72	GLI3	Hand2	1
GLI3_Hand2_third_motif.jpwm|M04150_2.00.jpwm|FF|73	1	100	0.32	0.583961	3.125	1.16446	0.244237	1	GLI3_Hand2_third_motif	Hand2	FF	73	GLI3	Hand2	1
GLI3_Hand2_third_motif.jpwm|M04150_2.00.jpwm|FF|70	1	100	0.3	0.460566	3.33333	1.51987	0.128544	1	GLI3_Hand2_third_motif	Hand2	FF	70	GLI3	Hand2	1
GLI3_Hand2_third_motif.jpwm|M04150_2.00.jpwm|FF|71	1	100	0.23	0.446196	4.34783	1.7257	0.0844016	1	GLI3_Hand2_third_motif	Hand2	FF	71	GLI3	Hand2	1
GLI3_Hand2_third_motif.jpwm|M04150_2.00.jpwm|FF|75	1	100	0.27	0.509605	3.7037	1.43248	0.152006	1	GLI3_Hand2_third_motif	Hand2	FF	75	GLI3	Hand2	1
GLI3_Hand2_third_motif.jpwm|M04150_2.00.jpwm|FR|81	1	100	0.21	0.433333	4.7619	1.82308	0.0682917	1	GLI3_Hand2_third_motif	Hand2	FR	81	GLI3	Hand2	1
GLI3_Hand2_third_motif.jpwm|M04150_2.00.jpwm|FR|54	2	100	0.37	0.580056	5.40541	2.81007	0.004953	2	GLI3_Hand2_third_motif	Hand2	FR	54	GLI3	Hand2	1
GLI3_Hand2_third_motif.jpwm|M04150_2.00.jpwm|FR|56	1	100	0.29	0.573752	3.44828	1.23747	0.215914	1	GLI3_Hand2_third_motif	Hand2	FR	56	GLI3	Hand2	1
GLI3_Hand2_third_motif.jpwm|M04150_2.00.jpwm|FF|68	1	100	0.34	0.572431	2.94118	1.15298	0.248919	1	GLI3_Hand2_third_motif	Hand2	FF	68	GLI3	Hand2	1
GLI3_Hand2_third_motif.jpwm|M04150_2.00.jpwm|FF|61	1	100	0.26	0.440844	3.84615	1.6786	0.0932304	1	GLI3_Hand2_third_motif	Hand2	FF	61	GLI3	Hand2	1
GLI3_Hand2_third_motif.jpwm|M04150_2.00.jpwm|FF|60	1	100	0.32	0.5101	3.125	1.33307	0.182508	1	GLI3_Hand2_third_motif	Hand2	FF	60	GLI3	Hand2	1
GLI3_Hand2_third_motif.jpwm|M04150_2.00.jpwm|FF|65	1	100	0.33	0.55149	3.0303	1.21489	0.224408	1	GLI3_Hand2_third_motif	Hand2	FF	65	GLI3	Hand2	1
GLI3_Hand2_third_motif.jpwm|M04150_2.00.jpwm|RF|94	1	100	0.39	0.58422	2.5641	1.04413	0.296427	1	GLI3_Hand2_third_motif	Hand2	RF	94	GLI3	Hand2	1
GLI3_Hand2_third_motif.jpwm|M04150_2.00.jpwm|RF|39	1	100	0.33	0.55149	3.0303	1.21489	0.224408	1	GLI3_Hand2_third_motif	Hand2	RF	39	GLI3	Hand2	1
GLI3_Hand2_third_motif.jpwm|M04150_2.00.jpwm|FF|-1	1	100	0.4	0.568535	2.5	1.05534	0.291268	1	GLI3_Hand2_third_motif	Hand2	FF	-1	GLI3	Hand2	1
GLI3_Hand2_third_motif.jpwm|M04150_2.00.jpwm|FF|11	1	100	0.42	0.638496	2.38095	0.908385	0.363675	1	GLI3_Hand2_third_motif	Hand2	FF	11	GLI3	Hand2	1
GLI3_Hand2_third_motif.jpwm|M04150_2.00.jpwm|FR|47	1	100	0.27	0.489382	3.7037	1.49168	0.135784	1	GLI3_Hand2_third_motif	Hand2	FR	47	GLI3	Hand2	1
GLI3_Hand2_third_motif.jpwm|M04150_2.00.jpwm|FR|46	1	100	0.22	0.439927	4.54545	1.77302	0.0762248	1	GLI3_Hand2_third_motif	Hand2	FR	46	GLI3	Hand2	1
GLI3_Hand2_third_motif.jpwm|M04150_2.00.jpwm|FR|44	1	100	0.22	0.504124	4.54545	1.54724	0.121806	1	GLI3_Hand2_third_motif	Hand2	FR	44	GLI3	Hand2	1
GLI3_Hand2_third_motif.jpwm|M04150_2.00.jpwm|FR|41	1	100	0.26	0.543464	3.84615	1.36163	0.173313	1	GLI3_Hand2_third_motif	Hand2	FR	41	GLI3	Hand2	1
GLI3_Hand2_third_motif.jpwm|M04150_2.00.jpwm|FR|40	1	100	0.21	0.477684	4.7619	1.65381	0.0981654	1	GLI3_Hand2_third_motif	Hand2	FR	40	GLI3	Hand2	1
GLI3_Hand2_third_motif.jpwm|M04150_2.00.jpwm|FF|58	1	100	0.27	0.509605	3.7037	1.43248	0.152006	1	GLI3_Hand2_third_motif	Hand2	FF	58	GLI3	Hand2	1
GLI3_Hand2_third_motif.jpwm|M04150_2.00.jpwm|FF|59	2	100	0.39	0.680092	5.12821	2.36733	0.0179171	2	GLI3_Hand2_third_motif	Hand2	FF	59	GLI3	Hand2	1
GLI3_Hand2_third_motif.jpwm|M04150_2.00.jpwm|FF|54	1	100	0.24	0.473969	4.16667	1.60348	0.108829	1	GLI3_Hand2_third_motif	Hand2	FF	54	GLI3	Hand2	1
GLI3_Hand2_third_motif.jpwm|M04150_2.00.jpwm|FF|55	1	100	0.39	0.633971	2.5641	0.962189	0.335955	1	GLI3_Hand2_third_motif	Hand2	FF	55	GLI3	Hand2	1
GLI3_Hand2_third_motif.jpwm|M04150_2.00.jpwm|FF|52	1	100	0.28	0.494004	3.57143	1.45748	0.144985	1	GLI3_Hand2_third_motif	Hand2	FF	52	GLI3	Hand2	1
GLI3_Hand2_third_motif.jpwm|M04150_2.00.jpwm|FF|53	1	100	0.31	0.580752	3.22581	1.18811	0.234788	1	GLI3_Hand2_third_motif	Hand2	FF	53	GLI3	Hand2	1
GLI3_Hand2_third_motif.jpwm|M04150_2.00.jpwm|FF|6	1	100	0.43	0.607279	2.32558	0.938613	0.34793	1	GLI3_Hand2_third_motif	Hand2	FF	6	GLI3	Hand2	1
GLI3_Hand2_third_motif.jpwm|M04150_2.00.jpwm|FF|7	1	100	0.35	0.625631	2.85714	1.03895	0.298827	1	GLI3_Hand2_third_motif	Hand2	FF	7	GLI3	Hand2	1
GLI3_Hand2_third_motif.jpwm|M04150_2.00.jpwm|FF|5	3	100	0.31	0.580752	9.67742	4.63193	3.62279e-06	3	GLI3_Hand2_third_motif	Hand2	FF	5	GLI3	Hand2	1
GLI3_Hand2_third_motif.jpwm|M04150_2.00.jpwm|FR|90	1	100	0.27	0.509605	3.7037	1.43248	0.152006	1	GLI3_Hand2_third_motif	Hand2	FR	90	GLI3	Hand2	1
GLI3_Hand2_third_motif.jpwm|M04150_2.00.jpwm|FR|98	1	100	0.29	0.607944	3.44828	1.16787	0.242859	1	GLI3_Hand2_third_motif	Hand2	FR	98	GLI3	Hand2	1
GLI3_Hand2_third_motif.jpwm|M04150_2.00.jpwm|RF|32	2	100	0.27	0.529055	7.40741	3.26998	0.00107554	2	GLI3_Hand2_third_motif	Hand2	RF	32	GLI3	Hand2	1
GLI3_Hand2_third_motif.jpwm|M04150_2.00.jpwm|FF|42	1	100	0.33	0.569512	3.0303	1.17645	0.239416	1	GLI3_Hand2_third_motif	Hand2	FF	42	GLI3	Hand2	1
GLI3_Hand2_third_motif.jpwm|M04150_2.00.jpwm|RF|36	1	100	0.2	0.449467	5	1.77989	0.0750944	1	GLI3_Hand2_third_motif	Hand2	RF	36	GLI3	Hand2	1
GLI3_Hand2_third_motif.jpwm|M04150_2.00.jpwm|FR|8	1	100	0.21	0.433333	4.7619	1.82308	0.0682917	1	GLI3_Hand2_third_motif	Hand2	FR	8	GLI3	Hand2	1
GLI3_Hand2_third_motif.jpwm|M04150_2.00.jpwm|FR|2	1	100	0.22	0.483673	4.54545	1.61266	0.106818	1	GLI3_Hand2_third_motif	Hand2	FR	2	GLI3	Hand2	1
GLI3_Hand2_third_motif.jpwm|M04150_2.00.jpwm|FR|0	2	100	0.25	0.51981	8	3.36662	0.000760962	2	GLI3_Hand2_third_motif	Hand2	FR	0	GLI3	Hand2	1
GLI3_Hand2_third_motif.jpwm|M04150_2.00.jpwm|FF|31	1	100	0.31	0.525991	3.22581	1.31181	0.189585	1	GLI3_Hand2_third_motif	Hand2	FF	31	GLI3	Hand2	1
GLI3_Hand2_third_motif.jpwm|M04150_2.00.jpwm|RF|29	1	100	0.27	0.489382	3.7037	1.49168	0.135784	1	GLI3_Hand2_third_motif	Hand2	RF	29	GLI3	Hand2	1
GLI3_Hand2_third_motif.jpwm|M04150_2.00.jpwm|FR|89	1	100	0.19	0.419114	5.26316	1.93265	0.0532795	1	GLI3_Hand2_third_motif	Hand2	FR	89	GLI3	Hand2	1
GLI3_Hand2_third_motif.jpwm|M04150_2.00.jpwm|FR|80	1	100	0.28	0.514045	3.57143	1.40066	0.161317	1	GLI3_Hand2_third_motif	Hand2	FR	80	GLI3	Hand2	1
GLI3_Hand2_third_motif.jpwm|M04150_2.00.jpwm|FR|84	1	100	0.2	0.512471	5	1.56106	0.118508	1	GLI3_Hand2_third_motif	Hand2	FR	84	GLI3	Hand2	1
GLI3_Hand2_third_motif.jpwm|M04150_2.00.jpwm|RF|20	1	100	0.32	0.566399	3.125	1.20057	0.229919	1	GLI3_Hand2_third_motif	Hand2	RF	20	GLI3	Hand2	1
GLI3_Hand2_third_motif.jpwm|M04150_2.00.jpwm|FF|35	1	100	0.31	0.544857	3.22581	1.26639	0.205374	1	GLI3_Hand2_third_motif	Hand2	FF	35	GLI3	Hand2	1
GLI3_Hand2_third_motif.jpwm|M04150_2.00.jpwm|FF|32	1	100	0.29	0.518253	3.44828	1.36999	0.170691	1	GLI3_Hand2_third_motif	Hand2	FF	32	GLI3	Hand2	1
GLI3_Hand2_third_motif.jpwm|M04150_2.00.jpwm|FF|33	1	100	0.35	0.592461	2.85714	1.09712	0.27259	1	GLI3_Hand2_third_motif	Hand2	FF	33	GLI3	Hand2	1
GLI3_Hand2_third_motif.jpwm|M04150_2.00.jpwm|RF|26	1	100	0.19	0.394277	5.26316	2.05439	0.0399378	1	GLI3_Hand2_third_motif	Hand2	RF	26	GLI3	Hand2	1
GLI3_only_first_motif.jpwm|M04150_2.00.jpwm|FR|41	1	100	0.07	0.256432	14.2857	3.62669	0.000287081	1	GLI3_only_first_motif	Hand2	FR	41	GLI3	Hand2	1
GLI3_only_first_motif.jpwm|M04150_2.00.jpwm|FR|42	1	100	0.13	0.366667	7.69231	2.37273	0.0176573	1	GLI3_only_first_motif	Hand2	FR	42	GLI3	Hand2	1
GLI3_only_first_motif.jpwm|M04150_2.00.jpwm|RF|75	1	100	0.09	0.287623	11.1111	3.16386	0.00155693	1	GLI3_only_first_motif	Hand2	RF	75	GLI3	Hand2	1
GLI3_only_first_motif.jpwm|M04150_2.00.jpwm|RF|70	1	100	0.11	0.314466	9.09091	2.83019	0.00465197	1	GLI3_only_first_motif	Hand2	RF	70	GLI3	Hand2	1
GLI3_only_first_motif.jpwm|M04150_2.00.jpwm|RF|73	1	100	0.09	0.287623	11.1111	3.16386	0.00155693	1	GLI3_only_first_motif	Hand2	RF	73	GLI3	Hand2	1
GLI3_only_first_motif.jpwm|M04150_2.00.jpwm|FR|8	1	100	0.09	0.320826	11.1111	2.83643	0.00456211	1	GLI3_only_first_motif	Hand2	FR	8	GLI3	Hand2	1
GLI3_only_first_motif.jpwm|M04150_2.00.jpwm|RF|63	1	100	0.12	0.356186	8.33333	2.47062	0.013488	1	GLI3_only_first_motif	Hand2	RF	63	GLI3	Hand2	1
GLI3_only_first_motif.jpwm|M04150_2.00.jpwm|RF|60	1	100	0.09	0.320826	11.1111	2.83643	0.00456211	1	GLI3_only_first_motif	Hand2	RF	60	GLI3	Hand2	1
GLI3_only_first_motif.jpwm|M04150_2.00.jpwm|RF|53	1	100	0.12	0.455716	8.33333	1.93103	0.0534795	1	GLI3_only_first_motif	Hand2	RF	53	GLI3	Hand2	1
GLI3_only_first_motif.jpwm|M04150_2.00.jpwm|RF|56	1	100	0.06	0.238683	16.6667	3.93827	8.20699e-05	1	GLI3_only_first_motif	Hand2	RF	56	GLI3	Hand2	1
GLI3_only_first_motif.jpwm|M04150_2.00.jpwm|RF|59	1	100	0.07	0.256432	14.2857	3.62669	0.000287081	1	GLI3_only_first_motif	Hand2	RF	59	GLI3	Hand2	1
GLI3_only_first_motif.jpwm|M04150_2.00.jpwm|RF|1	1	100	0.12	0.326599	8.33333	2.69444	0.00705073	1	GLI3_only_first_motif	Hand2	RF	1	GLI3	Hand2	1
GLI3_only_first_motif.jpwm|M04150_2.00.jpwm|RF|7	1	100	0.13	0.337998	7.69231	2.57398	0.0100535	1	GLI3_only_first_motif	Hand2	RF	7	GLI3	Hand2	1
GLI3_only_first_motif.jpwm|M04150_2.00.jpwm|RF|5	2	100	0.12	0.326599	16.6667	5.7563	8.59771e-09	2	GLI3_only_first_motif	Hand2	RF	5	GLI3	Hand2	1
GLI3_only_first_motif.jpwm|M04150_2.00.jpwm|RF|44	1	100	0.09	0.287623	11.1111	3.16386	0.00155693	1	GLI3_only_first_motif	Hand2	RF	44	GLI3	Hand2	1
GLI3_only_first_motif.jpwm|M04150_2.00.jpwm|RF|40	2	100	0.1	0.301511	20	6.30159	2.94613e-10	2	GLI3_only_first_motif	Hand2	RF	40	GLI3	Hand2	1
GLI3_only_first_motif.jpwm|M04150_2.00.jpwm|RF|48	1	100	0.12	0.326599	8.33333	2.69444	0.00705073	1	GLI3_only_first_motif	Hand2	RF	48	GLI3	Hand2	1
GLI3_only_first_motif.jpwm|M04150_2.00.jpwm|RF|49	1	100	0.08	0.307482	12.5	2.99204	0.00277119	1	GLI3_only_first_motif	Hand2	RF	49	GLI3	Hand2	1
GLI3_only_first_motif.jpwm|M04150_2.00.jpwm|FF|95	1	100	0.05	0.219043	20	4.33705	1.44408e-05	1	GLI3_only_first_motif	Hand2	FF	95	GLI3	Hand2	1
GLI3_only_first_motif.jpwm|M04150_2.00.jpwm|FF|82	1	100	0.04	0.196946	25	4.87442	1.09127e-06	1	GLI3_only_first_motif	Hand2	FF	82	GLI3	Hand2	1
GLI3_only_first_motif.jpwm|M04150_2.00.jpwm|FF|83	1	100	0.05	0.261116	20	3.63822	0.000274526	1	GLI3_only_first_motif	Hand2	FF	83	GLI3	Hand2	1
GLI3_only_first_motif.jpwm|M04150_2.00.jpwm|FF|78	1	100	0.06	0.238683	16.6667	3.93827	8.20699e-05	1	GLI3_only_first_motif	Hand2	FF	78	GLI3	Hand2	1
GLI3_only_first_motif.jpwm|M04150_2.00.jpwm|FF|72	1	100	0.12	0.356186	8.33333	2.47062	0.013488	1	GLI3_only_first_motif	Hand2	FF	72	GLI3	Hand2	1
GLI3_only_first_motif.jpwm|M04150_2.00.jpwm|RF|92	2	100	0.05	0.219043	40	8.90237	5.46691e-19	2	GLI3_only_first_motif	Hand2	RF	92	GLI3	Hand2	1
GLI3_only_first_motif.jpwm|M04150_2.00.jpwm|FF|68	1	100	0.09	0.287623	11.1111	3.16386	0.00155693	1	GLI3_only_first_motif	Hand2	FF	68	GLI3	Hand2	1
GLI3_only_first_motif.jpwm|M04150_2.00.jpwm|FF|69	1	100	0.08	0.27266	12.5	3.37417	0.000740396	1	GLI3_only_first_motif	Hand2	FF	69	GLI3	Hand2	1
GLI3_only_first_motif.jpwm|M04150_2.00.jpwm|FF|66	1	100	0.11	0.314466	9.09091	2.83019	0.00465197	1	GLI3_only_first_motif	Hand2	FF	66	GLI3	Hand2	1
GLI3_only_first_motif.jpwm|M04150_2.00.jpwm|FR|31	1	100	0.11	0.314466	9.09091	2.83019	0.00465197	1	GLI3_only_first_motif	Hand2	FR	31	GLI3	Hand2	1
GLI3_only_first_motif.jpwm|M04150_2.00.jpwm|FR|30	1	100	0.12	0.326599	8.33333	2.69444	0.00705073	1	GLI3_only_first_motif	Hand2	FR	30	GLI3	Hand2	1
GLI3_only_first_motif.jpwm|M04150_2.00.jpwm|RF|88	1	100	0.07	0.256432	14.2857	3.62669	0.000287081	1	GLI3_only_first_motif	Hand2	RF	88	GLI3	Hand2	1
GLI3_only_first_motif.jpwm|M04150_2.00.jpwm|FF|9	1	100	0.12	0.326599	8.33333	2.69444	0.00705073	1	GLI3_only_first_motif	Hand2	FF	9	GLI3	Hand2	1
GLI3_only_first_motif.jpwm|M04150_2.00.jpwm|FF|4	2	100	0.07	0.256432	28.5714	7.52635	5.21783e-14	2	GLI3_only_first_motif	Hand2	FF	4	GLI3	Hand2	1
GLI3_only_first_motif.jpwm|M04150_2.00.jpwm|FR|1	1	100	0.11	0.314466	9.09091	2.83019	0.00465197	1	GLI3_only_first_motif	Hand2	FR	1	GLI3	Hand2	1
GLI3_only_first_motif.jpwm|M04150_2.00.jpwm|FR|7	1	100	0.13	0.366667	7.69231	2.37273	0.0176573	1	GLI3_only_first_motif	Hand2	FR	7	GLI3	Hand2	1
GLI3_only_first_motif.jpwm|M04150_2.00.jpwm|FR|26	1	100	0.1	0.362372	10	2.48364	0.0130048	1	GLI3_only_first_motif	Hand2	FR	26	GLI3	Hand2	1
GLI3_only_first_motif.jpwm|M04150_2.00.jpwm|FR|24	1	100	0.13	0.366667	7.69231	2.37273	0.0176573	1	GLI3_only_first_motif	Hand2	FR	24	GLI3	Hand2	1
GLI3_only_first_motif.jpwm|M04150_2.00.jpwm|FF|40	2	100	0.05	0.219043	40	8.90237	5.46691e-19	2	GLI3_only_first_motif	Hand2	FF	40	GLI3	Hand2	1
GLI3_only_first_motif.jpwm|M04150_2.00.jpwm|FF|43	1	100	0.02	0.140705	50	6.96491	3.28609e-12	1	GLI3_only_first_motif	Hand2	FF	43	GLI3	Hand2	1
GLI3_only_first_motif.jpwm|M04150_2.00.jpwm|FF|44	1	100	0.06	0.238683	16.6667	3.93827	8.20699e-05	1	GLI3_only_first_motif	Hand2	FF	44	GLI3	Hand2	1
GLI3_only_first_motif.jpwm|M04150_2.00.jpwm|FF|45	1	100	0.03	0.171447	33.3333	5.65774	1.53381e-08	1	GLI3_only_first_motif	Hand2	FF	45	GLI3	Hand2	1
GLI3_only_first_motif.jpwm|M04150_2.00.jpwm|RF|-5	4	100	1.25	1.14922	3.2	2.39293	0.0167146	3	GLI3_only_first_motif	Hand2	RF	-5	GLI3	Hand2	1
GLI3_only_first_motif.jpwm|M04150_2.00.jpwm|FR|15	1	100	0.14	0.376588	7.14286	2.28367	0.0223912	1	GLI3_only_first_motif	Hand2	FR	15	GLI3	Hand2	1
GLI3_only_first_motif.jpwm|M04150_2.00.jpwm|FR|14	1	100	0.11	0.314466	9.09091	2.83019	0.00465197	1	GLI3_only_first_motif	Hand2	FR	14	GLI3	Hand2	1
GLI3_only_first_motif.jpwm|M04150_2.00.jpwm|FR|12	2	100	0.05	0.219043	40	8.90237	5.46691e-19	2	GLI3_only_first_motif	Hand2	FR	12	GLI3	Hand2	1
GLI3_only_first_motif.jpwm|M04150_2.00.jpwm|FR|10	1	100	0.1	0.301511	10	2.98496	0.00283613	1	GLI3_only_first_motif	Hand2	FR	10	GLI3	Hand2	1
GLI3_only_first_motif.jpwm|M04150_2.00.jpwm|FF|30	1	100	0.1	0.301511	10	2.98496	0.00283613	1	GLI3_only_first_motif	Hand2	FF	30	GLI3	Hand2	1
GLI3_only_first_motif.jpwm|M04150_2.00.jpwm|FF|39	1	100	0.1	0.301511	10	2.98496	0.00283613	1	GLI3_only_first_motif	Hand2	FF	39	GLI3	Hand2	1
GLI3_only_first_motif.jpwm|M04150_2.00.jpwm|FF|20	1	100	0.1	0.301511	10	2.98496	0.00283613	1	GLI3_only_first_motif	Hand2	FF	20	GLI3	Hand2	1
GLI3_only_first_motif.jpwm|M04150_2.00.jpwm|FR|75	1	100	0.09	0.320826	11.1111	2.83643	0.00456211	1	GLI3_only_first_motif	Hand2	FR	75	GLI3	Hand2	1
GLI3_only_first_motif.jpwm|M04150_2.00.jpwm|FR|79	1	100	0.06	0.238683	16.6667	3.93827	8.20699e-05	1	GLI3_only_first_motif	Hand2	FR	79	GLI3	Hand2	1
GLI3_only_first_motif.jpwm|M04150_2.00.jpwm|FR|78	1	100	0.05	0.219043	20	4.33705	1.44408e-05	1	GLI3_only_first_motif	Hand2	FR	78	GLI3	Hand2	1
GLI3_only_first_motif.jpwm|M04150_2.00.jpwm|FF|18	1	100	0.14	0.376588	7.14286	2.28367	0.0223912	1	GLI3_only_first_motif	Hand2	FF	18	GLI3	Hand2	1
GLI3_only_first_motif.jpwm|M04150_2.00.jpwm|FF|16	1	100	0.05	0.219043	20	4.33705	1.44408e-05	1	GLI3_only_first_motif	Hand2	FF	16	GLI3	Hand2	1
GLI3_only_first_motif.jpwm|M04150_2.00.jpwm|FF|15	1	100	0.13	0.366667	7.69231	2.37273	0.0176573	1	GLI3_only_first_motif	Hand2	FF	15	GLI3	Hand2	1
GLI3_only_first_motif.jpwm|M04150_2.00.jpwm|FF|14	1	100	0.07	0.256432	14.2857	3.62669	0.000287081	1	GLI3_only_first_motif	Hand2	FF	14	GLI3	Hand2	1
GLI3_only_first_motif.jpwm|M04150_2.00.jpwm|RF|21	1	100	0.09	0.320826	11.1111	2.83643	0.00456211	1	GLI3_only_first_motif	Hand2	RF	21	GLI3	Hand2	1
GLI3_only_first_motif.jpwm|M04150_2.00.jpwm|RF|28	1	100	0.1	0.389249	10	2.31214	0.0207699	1	GLI3_only_first_motif	Hand2	RF	28	GLI3	Hand2	1
GLI3_only_first_motif.jpwm|M04150_2.00.jpwm|FR|67	1	100	0.08	0.27266	12.5	3.37417	0.000740396	1	GLI3_only_first_motif	Hand2	FR	67	GLI3	Hand2	1
GLI3_only_first_motif.jpwm|M04150_2.00.jpwm|RF|17	1	100	0.13	0.366667	7.69231	2.37273	0.0176573	1	GLI3_only_first_motif	Hand2	RF	17	GLI3	Hand2	1
GLI3_only_first_motif.jpwm|M04150_2.00.jpwm|RF|13	1	100	0.11	0.314466	9.09091	2.83019	0.00465197	1	GLI3_only_first_motif	Hand2	RF	13	GLI3	Hand2	1
GLI3_only_first_motif.jpwm|M04150_2.00.jpwm|RF|12	1	100	0.15	0.435194	6.66667	1.95315	0.0508017	1	GLI3_only_first_motif	Hand2	RF	12	GLI3	Hand2	1
M04150_2.00.jpwm|M04150_2.00.jpwm|FF|72	1	100	0.08	0.27266	12.5	3.37417	0.000740396	1	Hand2	Hand2	FF	72	Hand2	Hand2	0
M04150_2.00.jpwm|M04150_2.00.jpwm|FF|2	4	100	0.11	0.314466	36.3636	12.3702	3.78994e-35	1	Hand2	Hand2	FF	2	Hand2	Hand2	0
M04150_2.00.jpwm|M04150_2.00.jpwm|FF|3	1	100	0.22	0.462317	4.54545	1.68715	0.091574	1	Hand2	Hand2	FF	3	Hand2	Hand2	0
M04150_2.00.jpwm|M04150_2.00.jpwm|FF|1	1	100	0.22	0.416333	4.54545	1.8735	0.0609995	1	Hand2	Hand2	FF	1	Hand2	Hand2	0
M04150_2.00.jpwm|M04150_2.00.jpwm|FF|8	2	100	0.12	0.326599	16.6667	5.7563	8.59771e-09	2	Hand2	Hand2	FF	8	Hand2	Hand2	0
M04150_2.00.jpwm|M04150_2.00.jpwm|FF|83	2	100	0.18	0.457927	11.1111	3.97443	7.05468e-05	2	Hand2	Hand2	FF	83	Hand2	Hand2	0
M04150_2.00.jpwm|M04150_2.00.jpwm|RF|84	1	100	0.05	0.219043	20	4.33705	1.44408e-05	1	Hand2	Hand2	RF	84	Hand2	Hand2	0
M04150_2.00.jpwm|M04150_2.00.jpwm|FR|85	1	100	0.02	0.140705	50	6.96491	3.28609e-12	1	Hand2	Hand2	FR	85	Hand2	Hand2	0
M04150_2.00.jpwm|M04150_2.00.jpwm|FF|76	1	100	0.15	0.385992	6.66667	2.20212	0.027657	1	Hand2	Hand2	FF	76	Hand2	Hand2	0
M04150_2.00.jpwm|M04150_2.00.jpwm|RF|93	1	100	0.02	0.140705	50	6.96491	3.28609e-12	1	Hand2	Hand2	RF	93	Hand2	Hand2	0
M04150_2.00.jpwm|M04150_2.00.jpwm|FR|84	1	100	0.05	0.219043	20	4.33705	1.44408e-05	1	Hand2	Hand2	FR	84	Hand2	Hand2	0
M04150_2.00.jpwm|M04150_2.00.jpwm|RF|6	1	100	0.05	0.219043	20	4.33705	1.44408e-05	1	Hand2	Hand2	RF	6	Hand2	Hand2	0
M04150_2.00.jpwm|M04150_2.00.jpwm|RF|4	1	100	0.06	0.238683	16.6667	3.93827	8.20699e-05	1	Hand2	Hand2	RF	4	Hand2	Hand2	0
M04150_2.00.jpwm|M04150_2.00.jpwm|RF|51	1	100	0.09	0.320826	11.1111	2.83643	0.00456211	1	Hand2	Hand2	RF	51	Hand2	Hand2	0
M04150_2.00.jpwm|M04150_2.00.jpwm|FR|62	1	100	0.06	0.238683	16.6667	3.93827	8.20699e-05	1	Hand2	Hand2	FR	62	Hand2	Hand2	0
M04150_2.00.jpwm|M04150_2.00.jpwm|RF|78	1	100	0.04	0.196946	25	4.87442	1.09127e-06	1	Hand2	Hand2	RF	78	Hand2	Hand2	0
M04150_2.00.jpwm|M04150_2.00.jpwm|FF|9	3	100	0.13	0.366667	23.0769	7.82727	4.98567e-15	2	Hand2	Hand2	FF	9	Hand2	Hand2	0
M04150_2.00.jpwm|M04150_2.00.jpwm|FF|14	3	100	0.13	0.366667	23.0769	7.82727	4.98567e-15	1	Hand2	Hand2	FF	14	Hand2	Hand2	0
M04150_2.00.jpwm|M04150_2.00.jpwm|FF|16	2	100	0.11	0.314466	18.1818	6.01019	1.85308e-09	2	Hand2	Hand2	FF	16	Hand2	Hand2	0
M04150_2.00.jpwm|M04150_2.00.jpwm|FF|17	1	100	0.19	0.442559	5.26316	1.83026	0.0672105	1	Hand2	Hand2	FF	17	Hand2	Hand2	0
M04150_2.00.jpwm|M04150_2.00.jpwm|FF|10	1	100	0.15	0.411329	6.66667	2.06647	0.0387841	1	Hand2	Hand2	FF	10	Hand2	Hand2	0
M04150_2.00.jpwm|M04150_2.00.jpwm|FF|11	2	100	0.14	0.376588	14.2857	4.93909	7.84878e-07	2	Hand2	Hand2	FF	11	Hand2	Hand2	0
M04150_2.00.jpwm|M04150_2.00.jpwm|FF|19	4	100	0.19	0.442559	21.0526	8.60902	7.36884e-18	1	Hand2	Hand2	FF	19	Hand2	Hand2	0
M04150_2.00.jpwm|M04150_2.00.jpwm|RF|9	1	100	0.09	0.320826	11.1111	2.83643	0.00456211	1	Hand2	Hand2	RF	9	Hand2	Hand2	0
M04150_2.00.jpwm|M04150_2.00.jpwm|FF|27	1	100	0.14	0.348735	7.14286	2.46606	0.013661	1	Hand2	Hand2	FF	27	Hand2	Hand2	0
M04150_2.00.jpwm|M04150_2.00.jpwm|FF|26	3	100	0.13	0.366667	23.0769	7.82727	4.98567e-15	2	Hand2	Hand2	FF	26	Hand2	Hand2	0
M04150_2.00.jpwm|M04150_2.00.jpwm|FF|28	2	100	0.12	0.356186	16.6667	5.27814	1.30504e-07	2	Hand2	Hand2	FF	28	Hand2	Hand2	0
M04150_2.00.jpwm|M04150_2.00.jpwm|FR|12	1	100	0.08	0.307482	12.5	2.99204	0.00277119	1	Hand2	Hand2	FR	12	Hand2	Hand2	0
M04150_2.00.jpwm|M04150_2.00.jpwm|RF|24	1	100	0.06	0.238683	16.6667	3.93827	8.20699e-05	1	Hand2	Hand2	RF	24	Hand2	Hand2	0
M04150_2.00.jpwm|M04150_2.00.jpwm|RF|23	1	100	0.06	0.238683	16.6667	3.93827	8.20699e-05	1	Hand2	Hand2	RF	23	Hand2	Hand2	0
M04150_2.00.jpwm|M04150_2.00.jpwm|RF|28	1	100	0.1	0.301511	10	2.98496	0.00283613	1	Hand2	Hand2	RF	28	Hand2	Hand2	0
M04150_2.00.jpwm|M04150_2.00.jpwm|FF|38	1	100	0.1	0.301511	10	2.98496	0.00283613	1	Hand2	Hand2	FF	38	Hand2	Hand2	0
M04150_2.00.jpwm|M04150_2.00.jpwm|FF|32	2	100	0.1	0.301511	20	6.30159	2.94613e-10	2	Hand2	Hand2	FF	32	Hand2	Hand2	0
M04150_2.00.jpwm|M04150_2.00.jpwm|RF|30	1	100	0.12	0.356186	8.33333	2.47062	0.013488	1	Hand2	Hand2	RF	30	Hand2	Hand2	0
M04150_2.00.jpwm|M04150_2.00.jpwm|FF|48	3	100	0.15	0.35887	20	7.94159	1.99609e-15	1	Hand2	Hand2	FF	48	Hand2	Hand2	0
M04150_2.00.jpwm|M04150_2.00.jpwm|FF|47	1	100	0.14	0.348735	7.14286	2.46606	0.013661	1	Hand2	Hand2	FF	47	Hand2	Hand2	0
M04150_2.00.jpwm|M04150_2.00.jpwm|FF|77	2	100	0.14	0.426875	14.2857	4.35725	1.31708e-05	1	Hand2	Hand2	FF	77	Hand2	Hand2	0
M04150_2.00.jpwm|M04150_2.00.jpwm|FR|31	1	100	0.07	0.256432	14.2857	3.62669	0.000287081	1	Hand2	Hand2	FR	31	Hand2	Hand2	0
M04150_2.00.jpwm|M04150_2.00.jpwm|FR|-1	1	100	0.02	0.140705	50	6.96491	3.28609e-12	1	Hand2	Hand2	FR	-1	Hand2	Hand2	0
M04150_2.00.jpwm|M04150_2.00.jpwm|FF|53	1	100	0.09	0.287623	11.1111	3.16386	0.00155693	1	Hand2	Hand2	FF	53	Hand2	Hand2	0
