# Supplementary material for: Gli3 utilizes Hand2 to synergistically regulate tissue-specific transcriptional networks
Source: eLife. 2020 Oct 2;9:e56450. doi: 10.7554/eLife.56450 (PMC7556880; doi:10.7554/eLife.56450)
Supplement: Supplementary file 4. [file elife-56450-supp4.xlsx]

## Sheet: E11.5_MANP_CHIP_GLI3_REP1_REP2_
#	This file is generated by MACS version 2.1.1.20160309
#	Command line: callpeak -t E11.5_MANP_CHIP_G3BF2_REP1_REP2_po	oled.sorted.bam -c ../../INPUT_CTRL/E11.5_MANP_INPUT_REP1_REP2_pooled.sorted.bam -f BAM -g mm -n E11.5_MANP_CHIP_G3BF_REP1_REP2_pooled_q0.01 -q 0.01 -m 5 50 --call-summits -B --trackline
#	ARGUMENTS LIST:
#	name = E11.5_MANP_CHIP_G3BF_REP1_REP2_pooled_q0.01
#	format = BAM
#	ChIP-seq file = ['E11.5_MANP_CHIP_G3BF2_REP1_REP2_pooled.sor	ted.bam']
#	control file = ['../../INPUT_CTRL/E11.5_MANP_INPUT_REP1_REP2	_pooled.sorted.bam']
#	effective genome size = 1.87e+09
#	band width = 300
#	model fold = [5, 50]
#	qvalue cutoff = 1.00e-02
#	Larger dataset will be scaled towards smaller dataset.
#	Range for calculating regional lambda is: 1000 bps and 10000	bps
#	Broad region calling is off
#	Paired-End mode is off
#	Searching for subpeak summits is on
#	tag size is determined as 68 bps
#	total tags in treatment: 55541559
#	tags after filtering in treatment: 33373485
#	maximum duplicate tags at the same position in treatment = 1
#	Redundant rate in treatment: 0.40
#	total tags in control: 72690292
#	tags after filtering in control: 51128427
#	maximum duplicate tags at the same position in control = 1
#	Redundant rate in control: 0.30
#	d = 149
#	alternative fragment length(s) may be 149 bps
c	hr start end length abs_summit pileup -log10(pvalue) fold_enr	ichment -log10(qvalue) name
c	hr1 3670644 3670965 322 3670822 31.00 22.94677 8.74515 19.382	61 E11.5_MANP_CHIP_G3BF_REP1_REP2_pooled_q0.01_peak_1
c	hr1 4571587 4572065 479 4571764 19.00 10.98767 5.46572 7.9702	6 E11.5_MANP_CHIP_G3BF_REP1_REP2_pooled_q0.01_peak_2
c	hr1 4785395 4785642 248 4785542 23.00 11.19078 4.88159 8.1624	4 E11.5_MANP_CHIP_G3BF_REP1_REP2_pooled_q0.01_peak_3
c	hr1 4807557 4807734 178 4807715 12.00 5.33746 3.55272 2.71634	E11.5_MANP_CHIP_G3BF_REP1_REP2_pooled_q0.01_peak_4
c	hr1 4807834 4808210 377 4807954 16.00 8.41648 4.64586 5.55904	E11.5_MANP_CHIP_G3BF_REP1_REP2_pooled_q0.01_peak_5
c	hr1 4857440 4858324 885 4857894 63.00 63.05638 17.49030 58.60	437 E11.5_MANP_CHIP_G3BF_REP1_REP2_pooled_q0.01_peak_6a
c	hr1 4857440 4858324 885 4858098 46.00 40.57973 12.84444 36.52	060 E11.5_MANP_CHIP_G3BF_REP1_REP2_pooled_q0.01_peak_6b
c	hr1 5022778 5022982 205 5022880 22.00 13.74746 6.28558 10.571	94 E11.5_MANP_CHIP_G3BF_REP1_REP2_pooled_q0.01_peak_7
c	hr1 5083119 5083553 435 5083196 16.00 8.26679 4.56593 5.44596	E11.5_MANP_CHIP_G3BF_REP1_REP2_pooled_q0.01_peak_8a
c	hr1 5083119 5083553 435 5083455 17.00 6.73634 3.66119 4.03008	E11.5_MANP_CHIP_G3BF_REP1_REP2_pooled_q0.01_peak_8b
c	hr1 6214465 6215180 716 6214520 17.00 8.20573 4.37716 5.38658	E11.5_MANP_CHIP_G3BF_REP1_REP2_pooled_q0.01_peak_9a
c	hr1 6214465 6215180 716 6214759 23.00 7.77364 3.49109 4.96894	E11.5_MANP_CHIP_G3BF_REP1_REP2_pooled_q0.01_peak_9b
c	hr1 6214465 6215180 716 6215040 25.00 16.67223 7.10544 13.358	40 E11.5_MANP_CHIP_G3BF_REP1_REP2_pooled_q0.01_peak_9c
c	hr1 6441263 6441489 227 6441343 13.00 6.06527 3.82600 3.38153	E11.5_MANP_CHIP_G3BF_REP1_REP2_pooled_q0.01_peak_10
c	hr1 7088547 7088795 249 7088674 18.00 10.10829 5.19243 7.1429	8 E11.5_MANP_CHIP_G3BF_REP1_REP2_pooled_q0.01_peak_11
c	hr1 7088902 7089355 454 7089130 23.00 14.70505 6.55886 11.482	59 E11.5_MANP_CHIP_G3BF_REP1_REP2_pooled_q0.01_peak_12
c	hr1 7397682 7397872 191 7397810 14.00 6.82220 4.09929 4.07683	E11.5_MANP_CHIP_G3BF_REP1_REP2_pooled_q0.01_peak_13
c	hr1 7398314 7398579 266 7398429 27.00 16.46606 6.56708 13.181	94 E11.5_MANP_CHIP_G3BF_REP1_REP2_pooled_q0.01_peak_14
c	hr1 7430153 7430398 246 7430291 33.00 16.26201 5.46456 12.988	19 E11.5_MANP_CHIP_G3BF_REP1_REP2_pooled_q0.01_peak_15
c	hr1 8123094 8123533 440 8123305 158.00 216.08217 43.45247 210	.56102 E11.5_MANP_CHIP_G3BF_REP1_REP2_pooled_q0.01_peak_16
c	hr1 9298477 9298707 231 9298590 32.00 21.36000 7.73977 17.866	47 E11.5_MANP_CHIP_G3BF_REP1_REP2_pooled_q0.01_peak_17
c	hr1 9545314 9545517 204 9545395 15.00 6.42739 3.75262 3.72916	E11.5_MANP_CHIP_G3BF_REP1_REP2_pooled_q0.01_peak_18
c	hr1 9545588 9546016 429 9545739 18.00 8.99552 4.62033 6.12223	E11.5_MANP_CHIP_G3BF_REP1_REP2_pooled_q0.01_peak_19a
c	hr1 9545588 9546016 429 9545930 21.00 7.41601 3.53589 4.65666	E11.5_MANP_CHIP_G3BF_REP1_REP2_pooled_q0.01_peak_19b
c	hr1 9700182 9700335 154 9700250 15.00 7.60646 4.37258 4.80472	E11.5_MANP_CHIP_G3BF_REP1_REP2_pooled_q0.01_peak_20
c	hr1 9700446 9700754 309 9700663 14.00 6.82220 4.09929 4.07683	E11.5_MANP_CHIP_G3BF_REP1_REP2_pooled_q0.01_peak_21
c	hr1 9748077 9748427 351 9748258 16.00 6.06792 3.45779 3.38153	E11.5_MANP_CHIP_G3BF_REP1_REP2_pooled_q0.01_peak_22
c	hr1 9798422 9798589 168 9798467 13.00 6.06527 3.82600 3.38153	E11.5_MANP_CHIP_G3BF_REP1_REP2_pooled_q0.01_peak_23
c	hr1 9943475 9944165 691 9944009 45.00 35.49615 10.78877 31.57	141 E11.5_MANP_CHIP_G3BF_REP1_REP2_pooled_q0.01_peak_24
c	hr1 10037695 10038128 434 10037869 15.00 7.60646 4.37258 4.80	472 E11.5_MANP_CHIP_G3BF_REP1_REP2_pooled_q0.01_peak_25
c	hr1 10039852 10040171 320 10040033 23.00 12.82070 5.62892 9.6	9682 E11.5_MANP_CHIP_G3BF_REP1_REP2_pooled_q0.01_peak_26
c	hr1 10232193 10233494 1302 10232305 22.00 13.74746 6.28558 10	.57194 E11.5_MANP_CHIP_G3BF_REP1_REP2_pooled_q0.01_peak_27a
c	hr1 10232193 10233494 1302 10232724 18.00 10.10829 5.19243 7.	14298 E11.5_MANP_CHIP_G3BF_REP1_REP2_pooled_q0.01_peak_27b
c	hr1 10232193 10233494 1302 10232924 26.00 17.68052 7.37872 14	.32329 E11.5_MANP_CHIP_G3BF_REP1_REP2_pooled_q0.01_peak_27c
c	hr1 10232193 10233494 1302 10233188 26.00 17.68052 7.37872 14	.32329 E11.5_MANP_CHIP_G3BF_REP1_REP2_pooled_q0.01_peak_27d
c	hr1 10993517 10994128 612 10993671 14.00 5.73077 3.51808 3.09	497 E11.5_MANP_CHIP_G3BF_REP1_REP2_pooled_q0.01_peak_28a
c	hr1 10993517 10994128 612 10993877 14.00 6.69293 4.02877 3.99	055 E11.5_MANP_CHIP_G3BF_REP1_REP2_pooled_q0.01_peak_28b
c	hr1 11414148 11414344 197 11414225 16.00 8.41648 4.64586 5.55	904 E11.5_MANP_CHIP_G3BF_REP1_REP2_pooled_q0.01_peak_29
c	hr1 11977612 11978033 422 11977812 18.00 8.66541 4.45623 5.79	866 E11.5_MANP_CHIP_G3BF_REP1_REP2_pooled_q0.01_peak_30
c	hr1 12644666 12644955 290 12644805 88.00 99.55711 24.32245 94	.70894 E11.5_MANP_CHIP_G3BF_REP1_REP2_pooled_q0.01_peak_31
c	hr1 12692154 12692461 308 12692342 13.00 6.06527 3.82600 3.38	153 E11.5_MANP_CHIP_G3BF_REP1_REP2_pooled_q0.01_peak_32
c	hr1 12990891 12991084 194 12991036 13.00 6.06527 3.82600 3.38	153 E11.5_MANP_CHIP_G3BF_REP1_REP2_pooled_q0.01_peak_33
c	hr1 12992213 12992376 164 12992298 20.00 11.41729 5.49669 8.3	8526 E11.5_MANP_CHIP_G3BF_REP1_REP2_pooled_q0.01_peak_34
c	hr1 13372636 13374111 1476 13372764 30.00 19.36089 7.27069 15	.94879 E11.5_MANP_CHIP_G3BF_REP1_REP2_pooled_q0.01_peak_35a
c	hr1 13372636 13374111 1476 13373021 21.00 12.80816 6.01229 9.	68985 E11.5_MANP_CHIP_G3BF_REP1_REP2_pooled_q0.01_peak_35b
c	hr1 13372636 13374111 1476 13373493 31.00 18.09393 6.50879 14	.72956 E11.5_MANP_CHIP_G3BF_REP1_REP2_pooled_q0.01_peak_35c
c	hr1 13372636 13374111 1476 13373977 20.00 11.88794 5.73901 8.	81922 E11.5_MANP_CHIP_G3BF_REP1_REP2_pooled_q0.01_peak_35d
c	hr1 13374203 13374411 209 13374319 19.00 7.06863 3.59120 4.31	928 E11.5_MANP_CHIP_G3BF_REP1_REP2_pooled_q0.01_peak_36
c	hr1 13589014 13589869 856 13589314 21.00 12.80816 6.01229 9.6	8985 E11.5_MANP_CHIP_G3BF_REP1_REP2_pooled_q0.01_peak_37a
c	hr1 13589014 13589869 856 13589607 23.00 14.70505 6.55886 11.	48259 E11.5_MANP_CHIP_G3BF_REP1_REP2_pooled_q0.01_peak_37b
c	hr1 13771253 13771418 166 13771376 22.00 9.12981 4.12988 6.25	313 E11.5_MANP_CHIP_G3BF_REP1_REP2_pooled_q0.01_peak_38
c	hr1 13860975 13861250 276 13861147 19.00 10.80724 5.37169 7.8	2372 E11.5_MANP_CHIP_G3BF_REP1_REP2_pooled_q0.01_peak_39
c	hr1 14004693 14004875 183 14004838 12.00 5.33746 3.55272 2.71	634 E11.5_MANP_CHIP_G3BF_REP1_REP2_pooled_q0.01_peak_40
c	hr1 14054143 14054391 249 14054250 28.00 19.74358 7.92529 16.	30083 E11.5_MANP_CHIP_G3BF_REP1_REP2_pooled_q0.01_peak_41
c	hr1 14184958 14185240 283 14185083 37.00 29.70242 10.38487 25	.92228 E11.5_MANP_CHIP_G3BF_REP1_REP2_pooled_q0.01_peak_42
c	hr1 14307180 14307549 370 14307371 19.00 10.98767 5.46572 7.9	7026 E11.5_MANP_CHIP_G3BF_REP1_REP2_pooled_q0.01_peak_43
c	hr1 14309617 14310095 479 14309749 21.00 9.62773 4.47479 6.70	316 E11.5_MANP_CHIP_G3BF_REP1_REP2_pooled_q0.01_peak_44a
c	hr1 14309617 14310095 479 14309946 21.00 12.80816 6.01229 9.6	8985 E11.5_MANP_CHIP_G3BF_REP1_REP2_pooled_q0.01_peak_44b
c	hr1 14506542 14506918 377 14506646 17.00 9.25085 4.91915 6.33	859 E11.5_MANP_CHIP_G3BF_REP1_REP2_pooled_q0.01_peak_45
c	hr1 15286480 15287269 790 15286632 17.00 9.25085 4.91915 6.33	859 E11.5_MANP_CHIP_G3BF_REP1_REP2_pooled_q0.01_peak_46a
c	hr1 15286480 15287269 790 15286890 14.00 6.82220 4.09929 4.07	683 E11.5_MANP_CHIP_G3BF_REP1_REP2_pooled_q0.01_peak_46b
c	hr1 15286480 15287269 790 15287147 11.00 4.64076 3.27943 2.08	535 E11.5_MANP_CHIP_G3BF_REP1_REP2_pooled_q0.01_peak_46c
c	hr1 15805617 15806478 862 15805782 31.00 22.94677 8.74515 19.	38261 E11.5_MANP_CHIP_G3BF_REP1_REP2_pooled_q0.01_peak_47a
c	hr1 15805617 15806478 862 15806304 11.00 4.64076 3.27943 2.08	535 E11.5_MANP_CHIP_G3BF_REP1_REP2_pooled_q0.01_peak_47b
c	hr1 15805617 15806478 862 15806340 16.00 7.14960 3.98715 4.39	330 E11.5_MANP_CHIP_G3BF_REP1_REP2_pooled_q0.01_peak_47c
c	hr1 15892536 15892686 151 15892632 15.00 7.60646 4.37258 4.80	472 E11.5_MANP_CHIP_G3BF_REP1_REP2_pooled_q0.01_peak_48
c	hr1 16104081 16104410 330 16104256 20.00 11.88794 5.73901 8.8	1922 E11.5_MANP_CHIP_G3BF_REP1_REP2_pooled_q0.01_peak_49
c	hr1 16104664 16105645 982 16104765 17.00 7.89603 4.22169 5.08	356 E11.5_MANP_CHIP_G3BF_REP1_REP2_pooled_q0.01_peak_50a
c	hr1 16104664 16105645 982 16105007 26.00 17.68052 7.37872 14.	32329 E11.5_MANP_CHIP_G3BF_REP1_REP2_pooled_q0.01_peak_50b
c	hr1 16105856 16106068 213 16106045 14.00 4.80458 3.05099 2.24	391 E11.5_MANP_CHIP_G3BF_REP1_REP2_pooled_q0.01_peak_51
c	hr1 16136878 16137094 217 16137010 20.00 11.88794 5.73901 8.8	1922 E11.5_MANP_CHIP_G3BF_REP1_REP2_pooled_q0.01_peak_52
c	hr1 16202050 16202206 157 16202126 17.00 9.25085 4.91915 6.33	859 E11.5_MANP_CHIP_G3BF_REP1_REP2_pooled_q0.01_peak_53
c	hr1 16342938 16343116 179 16343016 20.00 8.87424 4.27139 6.00	180 E11.5_MANP_CHIP_G3BF_REP1_REP2_pooled_q0.01_peak_54
c	hr1 16518716 16519274 559 16518920 16.00 8.41648 4.64586 5.55	904 E11.5_MANP_CHIP_G3BF_REP1_REP2_pooled_q0.01_peak_55a
c	hr1 16518716 16519274 559 16519164 18.00 10.10829 5.19243 7.1	4298 E11.5_MANP_CHIP_G3BF_REP1_REP2_pooled_q0.01_peak_55b
c	hr1 16519361 16519573 213 16519447 19.00 10.98767 5.46572 7.9	7026 E11.5_MANP_CHIP_G3BF_REP1_REP2_pooled_q0.01_peak_56
c	hr1 16519703 16520162 460 16519830 27.00 16.46606 6.56708 13.	18194 E11.5_MANP_CHIP_G3BF_REP1_REP2_pooled_q0.01_peak_57a
c	hr1 16519703 16520162 460 16520049 21.00 12.80816 6.01229 9.6	8985 E11.5_MANP_CHIP_G3BF_REP1_REP2_pooled_q0.01_peak_57b
c	hr1 16618555 16618746 192 16618677 22.00 13.74746 6.28558 10.	57194 E11.5_MANP_CHIP_G3BF_REP1_REP2_pooled_q0.01_peak_58
c	hr1 16618845 16619665 821 16618947 20.00 11.88794 5.73901 8.8	1922 E11.5_MANP_CHIP_G3BF_REP1_REP2_pooled_q0.01_peak_59a
c	hr1 16618845 16619665 821 16619147 32.00 19.02124 6.71219 15.	61584 E11.5_MANP_CHIP_G3BF_REP1_REP2_pooled_q0.01_peak_59b
c	hr1 16618845 16619665 821 16619514 18.00 10.10829 5.19243 7.1	4298 E11.5_MANP_CHIP_G3BF_REP1_REP2_pooled_q0.01_peak_59c
c	hr1 16656429 16657129 701 16656837 46.00 33.21080 9.55978 29.	34756 E11.5_MANP_CHIP_G3BF_REP1_REP2_pooled_q0.01_peak_60
c	hr1 16665122 16665765 644 16665309 36.00 27.66827 9.68464 23.	95154 E11.5_MANP_CHIP_G3BF_REP1_REP2_pooled_q0.01_peak_61a
c	hr1 16665122 16665765 644 16665486 41.00 30.95509 9.85062 27.	13732 E11.5_MANP_CHIP_G3BF_REP1_REP2_pooled_q0.01_peak_61b
c	hr1 17097656 17097968 313 17097786 15.00 7.60646 4.37258 4.80	472 E11.5_MANP_CHIP_G3BF_REP1_REP2_pooled_q0.01_peak_62
c	hr1 17145497 17145762 266 17145640 26.00 17.68052 7.37872 14.	32329 E11.5_MANP_CHIP_G3BF_REP1_REP2_pooled_q0.01_peak_63
c	hr1 17450719 17450867 149 17450790 14.00 6.82220 4.09929 4.07	683 E11.5_MANP_CHIP_G3BF_REP1_REP2_pooled_q0.01_peak_64
c	hr1 17451253 17451589 337 17451424 30.00 19.36089 7.27069 15.	94879 E11.5_MANP_CHIP_G3BF_REP1_REP2_pooled_q0.01_peak_65
c	hr1 17727151 17727508 358 17727471 14.00 6.82220 4.09929 4.07	683 E11.5_MANP_CHIP_G3BF_REP1_REP2_pooled_q0.01_peak_66
c	hr1 17727661 17727815 155 17727734 16.00 8.41648 4.64586 5.55	904 E11.5_MANP_CHIP_G3BF_REP1_REP2_pooled_q0.01_peak_67
c	hr1 20135245 20135457 213 20135335 15.00 7.60646 4.37258 4.80	472 E11.5_MANP_CHIP_G3BF_REP1_REP2_pooled_q0.01_peak_68
c	hr1 20466266 20466852 587 20466612 84.00 93.48758 23.22931 88	.69501 E11.5_MANP_CHIP_G3BF_REP1_REP2_pooled_q0.01_peak_69
c	hr1 20819907 20820234 328 20820065 19.00 9.45664 4.69077 6.53	596 E11.5_MANP_CHIP_G3BF_REP1_REP2_pooled_q0.01_peak_70
c	hr1 21078926 21079266 341 21079151 19.00 10.98767 5.46572 7.9	7026 E11.5_MANP_CHIP_G3BF_REP1_REP2_pooled_q0.01_peak_71
c	hr1 21079483 21079665 183 21079578 21.00 12.80816 6.01229 9.6	8985 E11.5_MANP_CHIP_G3BF_REP1_REP2_pooled_q0.01_peak_72
c	hr1 21218550 21218747 198 21218631 16.00 8.41648 4.64586 5.55	904 E11.5_MANP_CHIP_G3BF_REP1_REP2_pooled_q0.01_peak_73
c	hr1 21521518 21521831 314 21521686 26.00 15.53067 6.33254 12.	29179 E11.5_MANP_CHIP_G3BF_REP1_REP2_pooled_q0.01_peak_74
c	hr1 22805474 22805990 517 22805741 23.00 12.82070 5.62892 9.6	9682 E11.5_MANP_CHIP_G3BF_REP1_REP2_pooled_q0.01_peak_75
c	hr1 23256342 23256998 657 23256415 19.00 9.45664 4.69077 6.53	596 E11.5_MANP_CHIP_G3BF_REP1_REP2_pooled_q0.01_peak_76a
c	hr1 23256342 23256998 657 23256644 22.00 10.40017 4.67819 7.4	2281 E11.5_MANP_CHIP_G3BF_REP1_REP2_pooled_q0.01_peak_76b
c	hr1 23256342 23256998 657 23256829 20.00 11.88794 5.73901 8.8	1922 E11.5_MANP_CHIP_G3BF_REP1_REP2_pooled_q0.01_peak_76c
c	hr1 23382866 23383087 222 23382962 16.00 8.41648 4.64586 5.55	904 E11.5_MANP_CHIP_G3BF_REP1_REP2_pooled_q0.01_peak_77
c	hr1 23921680 23922278 599 23921818 18.00 10.10829 5.19243 7.1	4298 E11.5_MANP_CHIP_G3BF_REP1_REP2_pooled_q0.01_peak_78a
c	hr1 23921680 23922278 599 23922181 19.00 10.98767 5.46572 7.9	7026 E11.5_MANP_CHIP_G3BF_REP1_REP2_pooled_q0.01_peak_78b
c	hr1 24005300 24005579 280 24005495 19.00 9.45664 4.69077 6.53	596 E11.5_MANP_CHIP_G3BF_REP1_REP2_pooled_q0.01_peak_79
c	hr1 24099417 24100304 888 24099475 14.00 6.14722 3.73599 3.45	996 E11.5_MANP_CHIP_G3BF_REP1_REP2_pooled_q0.01_peak_80a
c	hr1 24099417 24100304 888 24099708 18.00 7.42758 3.86459 4.66	513 E11.5_MANP_CHIP_G3BF_REP1_REP2_pooled_q0.01_peak_80b
c	hr1 24099417 24100304 888 24099969 27.00 10.40657 4.07294 7.4	2899 E11.5_MANP_CHIP_G3BF_REP1_REP2_pooled_q0.01_peak_80c
c	hr1 24099417 24100304 888 24100105 29.00 18.38166 7.03616 15.	01118 E11.5_MANP_CHIP_G3BF_REP1_REP2_pooled_q0.01_peak_80d
c	hr1 24100590 24100814 225 24100731 17.00 9.25085 4.91915 6.33	859 E11.5_MANP_CHIP_G3BF_REP1_REP2_pooled_q0.01_peak_81
c	hr1 24196212 24196446 235 24196369 17.00 7.89603 4.22169 5.08	356 E11.5_MANP_CHIP_G3BF_REP1_REP2_pooled_q0.01_peak_82
c	hr1 24569566 24569947 382 24569785 42.00 32.07565 10.08516 28	.22521 E11.5_MANP_CHIP_G3BF_REP1_REP2_pooled_q0.01_peak_83
c	hr1 24611560 24612650 1091 24611795 169.00 15.54173 1.98006 1	2.30282 E11.5_MANP_CHIP_G3BF_REP1_REP2_pooled_q0.01_peak_84a
c	hr1 24611560 24612650 1091 24612127 131.00 7.43586 1.64654 4.	67341 E11.5_MANP_CHIP_G3BF_REP1_REP2_pooled_q0.01_peak_84b
c	hr1 24611560 24612650 1091 24612480 183.00 22.43351 2.25954 1	8.89997 E11.5_MANP_CHIP_G3BF_REP1_REP2_pooled_q0.01_peak_84c
c	hr1 24613193 24616167 2975 24613425 173.00 12.73512 1.81919 9	.64789 E11.5_MANP_CHIP_G3BF_REP1_REP2_pooled_q0.01_peak_85a
c	hr1 24613193 24616167 2975 24613671 174.00 16.23421 1.99421 1	2.96087 E11.5_MANP_CHIP_G3BF_REP1_REP2_pooled_q0.01_peak_85b
c	hr1 24613193 24616167 2975 24613885 175.00 16.98770 2.02808 1	3.67198 E11.5_MANP_CHIP_G3BF_REP1_REP2_pooled_q0.01_peak_85c
c	hr1 24613193 24616167 2975 24614155 161.00 13.44268 1.90134 1	0.30952 E11.5_MANP_CHIP_G3BF_REP1_REP2_pooled_q0.01_peak_85d
c	hr1 24613193 24616167 2975 24614611 168.00 12.11812 1.80384 9	.03872 E11.5_MANP_CHIP_G3BF_REP1_REP2_pooled_q0.01_peak_85e
c	hr1 24613193 24616167 2975 24614996 185.00 17.56132 2.01335 1	4.23250 E11.5_MANP_CHIP_G3BF_REP1_REP2_pooled_q0.01_peak_85f
c	hr1 24613193 24616167 2975 24615299 165.00 15.76345 2.00970 1	2.49365 E11.5_MANP_CHIP_G3BF_REP1_REP2_pooled_q0.01_peak_85g
c	hr1 24613193 24616167 2975 24615505 141.00 9.63591 1.75636 6.	71133 E11.5_MANP_CHIP_G3BF_REP1_REP2_pooled_q0.01_peak_85h
c	hr1 24613193 24616167 2975 24615913 176.00 19.02097 2.12625 1	5.61584 E11.5_MANP_CHIP_G3BF_REP1_REP2_pooled_q0.01_peak_85i
c	hr1 24678481 24679083 603 24678691 16.00 8.26679 4.56593 5.44	596 E11.5_MANP_CHIP_G3BF_REP1_REP2_pooled_q0.01_peak_86a
c	hr1 24678481 24679083 603 24678939 14.00 5.73077 3.51808 3.09	497 E11.5_MANP_CHIP_G3BF_REP1_REP2_pooled_q0.01_peak_86b
c	hr1 25228558 25228917 360 25228777 83.00 78.39799 17.08557 73	.76316 E11.5_MANP_CHIP_G3BF_REP1_REP2_pooled_q0.01_peak_87
c	hr1 25830587 25830752 166 25830715 15.00 7.60646 4.37258 4.80	472 E11.5_MANP_CHIP_G3BF_REP1_REP2_pooled_q0.01_peak_88
c	hr1 29049144 29049421 278 29049264 31.00 22.94677 8.74515 19.	38261 E11.5_MANP_CHIP_G3BF_REP1_REP2_pooled_q0.01_peak_89
c	hr1 30778605 30778895 291 30778811 14.00 6.82220 4.09929 4.07	683 E11.5_MANP_CHIP_G3BF_REP1_REP2_pooled_q0.01_peak_90
c	hr1 30873033 30873896 864 30873137 19.00 10.98767 5.46572 7.9	7026 E11.5_MANP_CHIP_G3BF_REP1_REP2_pooled_q0.01_peak_91a
c	hr1 30873033 30873896 864 30873507 36.00 28.54655 10.11158 24	.80025 E11.5_MANP_CHIP_G3BF_REP1_REP2_pooled_q0.01_peak_91b
c	hr1 30948527 30948879 353 30948771 16.00 8.41648 4.64586 5.55	904 E11.5_MANP_CHIP_G3BF_REP1_REP2_pooled_q0.01_peak_92
c	hr1 30948993 30949681 689 30949201 27.00 18.70449 7.65201 15.	30417 E11.5_MANP_CHIP_G3BF_REP1_REP2_pooled_q0.01_peak_93a
c	hr1 30948993 30949681 689 30949447 43.00 36.86421 12.02458 32	.89013 E11.5_MANP_CHIP_G3BF_REP1_REP2_pooled_q0.01_peak_93b
c	hr1 30949814 30950248 435 30949984 36.00 20.65369 6.64372 17.	19692 E11.5_MANP_CHIP_G3BF_REP1_REP2_pooled_q0.01_peak_94
c	hr1 31095850 31096070 221 31095945 15.00 7.60646 4.37258 4.80	472 E11.5_MANP_CHIP_G3BF_REP1_REP2_pooled_q0.01_peak_95
c	hr1 33669671 33670344 674 33669745 14.00 6.82220 4.09929 4.07	683 E11.5_MANP_CHIP_G3BF_REP1_REP2_pooled_q0.01_peak_96a
c	hr1 33669671 33670344 674 33669939 14.00 6.82220 4.09929 4.07	683 E11.5_MANP_CHIP_G3BF_REP1_REP2_pooled_q0.01_peak_96b
c	hr1 33719903 33720464 562 33720095 38.00 30.86952 10.65815 27	.05543 E11.5_MANP_CHIP_G3BF_REP1_REP2_pooled_q0.01_peak_97
c	hr1 33757522 33757915 394 33757609 16.00 8.41648 4.64586 5.55	904 E11.5_MANP_CHIP_G3BF_REP1_REP2_pooled_q0.01_peak_98
c	hr1 33763888 33764386 499 33764057 50.00 45.66067 13.93758 41	.49469 E11.5_MANP_CHIP_G3BF_REP1_REP2_pooled_q0.01_peak_99
c	hr1 33813830 33814740 911 33814226 44.00 38.09327 12.29787 34	.09045 E11.5_MANP_CHIP_G3BF_REP1_REP2_pooled_q0.01_peak_100a
c	hr1 33813830 33814740 911 33814457 45.00 39.33184 12.57115 35	.30061 E11.5_MANP_CHIP_G3BF_REP1_REP2_pooled_q0.01_peak_100b
c	hr1 34434807 34435082 276 34434924 19.00 10.98767 5.46572 7.9	7026 E11.5_MANP_CHIP_G3BF_REP1_REP2_pooled_q0.01_peak_101
c	hr1 34439075 34439244 170 34439105 11.00 4.64076 3.27943 2.08	535 E11.5_MANP_CHIP_G3BF_REP1_REP2_pooled_q0.01_peak_102
c	hr1 34439899 34440204 306 34440076 12.00 5.33746 3.55272 2.71	634 E11.5_MANP_CHIP_G3BF_REP1_REP2_pooled_q0.01_peak_103
c	hr1 34536668 34536999 332 34536840 56.00 48.71859 13.36870 44	.49790 E11.5_MANP_CHIP_G3BF_REP1_REP2_pooled_q0.01_peak_104
c	hr1 34579602 34579765 164 34579684 18.00 10.10829 5.19243 7.1	4298 E11.5_MANP_CHIP_G3BF_REP1_REP2_pooled_q0.01_peak_105
c	hr1 34707187 34707437 251 34707329 26.00 9.72455 3.92748 6.79	835 E11.5_MANP_CHIP_G3BF_REP1_REP2_pooled_q0.01_peak_106
c	hr1 34842351 34843037 687 34842624 27.00 18.44181 7.52036 15.	07000 E11.5_MANP_CHIP_G3BF_REP1_REP2_pooled_q0.01_peak_107a
c	hr1 34842351 34843037 687 34842935 21.00 11.10059 5.15985 8.0	7674 E11.5_MANP_CHIP_G3BF_REP1_REP2_pooled_q0.01_peak_107b
c	hr1 35755994 35756227 234 35756074 15.00 7.60646 4.37258 4.80	472 E11.5_MANP_CHIP_G3BF_REP1_REP2_pooled_q0.01_peak_108
c	hr1 36065110 36065287 178 36065159 11.00 4.64076 3.27943 2.08	535 E11.5_MANP_CHIP_G3BF_REP1_REP2_pooled_q0.01_peak_109
c	hr1 36068264 36068440 177 36068362 15.00 7.60646 4.37258 4.80	472 E11.5_MANP_CHIP_G3BF_REP1_REP2_pooled_q0.01_peak_110
c	hr1 36244114 36244380 267 36244161 12.00 4.76964 3.23786 2.21	284 E11.5_MANP_CHIP_G3BF_REP1_REP2_pooled_q0.01_peak_111
c	hr1 36307786 36307966 181 36307872 16.00 8.41648 4.64586 5.55	904 E11.5_MANP_CHIP_G3BF_REP1_REP2_pooled_q0.01_peak_112
c	hr1 36368505 36369375 871 36368640 24.00 15.44841 6.71461 12.	21472 E11.5_MANP_CHIP_G3BF_REP1_REP2_pooled_q0.01_peak_113a
c	hr1 36368505 36369375 871 36368913 39.00 28.74474 9.38154 24.	99456 E11.5_MANP_CHIP_G3BF_REP1_REP2_pooled_q0.01_peak_113b
c	hr1 36368505 36369375 871 36369228 33.00 17.95958 6.10504 14.	59911 E11.5_MANP_CHIP_G3BF_REP1_REP2_pooled_q0.01_peak_113c
c	hr1 36471816 36472067 252 36471971 14.00 6.82220 4.09929 4.07	683 E11.5_MANP_CHIP_G3BF_REP1_REP2_pooled_q0.01_peak_114
c	hr1 36511920 36512123 204 36512021 19.00 10.98767 5.46572 7.9	7026 E11.5_MANP_CHIP_G3BF_REP1_REP2_pooled_q0.01_peak_115
c	hr1 36512512 36512851 340 36512612 18.00 10.10829 5.19243 7.1	4298 E11.5_MANP_CHIP_G3BF_REP1_REP2_pooled_q0.01_peak_116
c	hr1 36546851 36547237 387 36546999 16.00 8.41648 4.64586 5.55	904 E11.5_MANP_CHIP_G3BF_REP1_REP2_pooled_q0.01_peak_117a
c	hr1 36546851 36547237 387 36547127 18.00 10.10829 5.19243 7.1	4298 E11.5_MANP_CHIP_G3BF_REP1_REP2_pooled_q0.01_peak_117b
c	hr1 36548053 36548302 250 36548215 15.00 7.60646 4.37258 4.80	472 E11.5_MANP_CHIP_G3BF_REP1_REP2_pooled_q0.01_peak_118
c	hr1 36556460 36558355 1896 36556770 32.00 15.44615 5.30384 12	.21388 E11.5_MANP_CHIP_G3BF_REP1_REP2_pooled_q0.01_peak_119a
c	hr1 36556460 36558355 1896 36557130 34.00 22.82980 7.94727 19	.29251 E11.5_MANP_CHIP_G3BF_REP1_REP2_pooled_q0.01_peak_119b
c	hr1 36556460 36558355 1896 36557511 30.00 19.20240 7.19797 15	.79557 E11.5_MANP_CHIP_G3BF_REP1_REP2_pooled_q0.01_peak_119c
c	hr1 36556460 36558355 1896 36557781 25.00 15.08436 6.32256 11	.85922 E11.5_MANP_CHIP_G3BF_REP1_REP2_pooled_q0.01_peak_119d
c	hr1 36556460 36558355 1896 36557947 23.00 9.85413 4.30944 6.9	2564 E11.5_MANP_CHIP_G3BF_REP1_REP2_pooled_q0.01_peak_119e
c	hr1 36588318 36588881 564 36588614 52.00 48.25232 14.48416 44	.03549 E11.5_MANP_CHIP_G3BF_REP1_REP2_pooled_q0.01_peak_120
c	hr1 36709621 36709950 330 36709843 19.00 8.14055 4.06799 5.32	214 E11.5_MANP_CHIP_G3BF_REP1_REP2_pooled_q0.01_peak_121
c	hr1 36938878 36939879 1002 36938974 12.00 5.06901 3.40271 2.4	9672 E11.5_MANP_CHIP_G3BF_REP1_REP2_pooled_q0.01_peak_122a
c	hr1 36938878 36939879 1002 36939172 19.00 9.45664 4.69077 6.5	3596 E11.5_MANP_CHIP_G3BF_REP1_REP2_pooled_q0.01_peak_122b
c	hr1 36938878 36939879 1002 36939514 38.00 30.86952 10.65815 2	7.05543 E11.5_MANP_CHIP_G3BF_REP1_REP2_pooled_q0.01_peak_122c
c	hr1 36938878 36939879 1002 36939795 22.00 13.74746 6.28558 10	.57194 E11.5_MANP_CHIP_G3BF_REP1_REP2_pooled_q0.01_peak_122d
c	hr1 36940002 36940150 149 36940063 15.00 7.60646 4.37258 4.80	472 E11.5_MANP_CHIP_G3BF_REP1_REP2_pooled_q0.01_peak_123
c	hr1 37093337 37093510 174 37093409 17.00 9.25085 4.91915 6.33	859 E11.5_MANP_CHIP_G3BF_REP1_REP2_pooled_q0.01_peak_124
c	hr1 37122175 37122619 445 37122396 55.00 29.96845 6.84586 26.	18301 E11.5_MANP_CHIP_G3BF_REP1_REP2_pooled_q0.01_peak_125
c	hr1 37185381 37185534 154 37185454 18.00 8.66541 4.45623 5.79	866 E11.5_MANP_CHIP_G3BF_REP1_REP2_pooled_q0.01_peak_126
c	hr1 37207341 37207531 191 37207507 12.00 5.33746 3.55272 2.71	634 E11.5_MANP_CHIP_G3BF_REP1_REP2_pooled_q0.01_peak_127
c	hr1 37218478 37218677 200 37218581 23.00 11.19078 4.88159 8.1	6244 E11.5_MANP_CHIP_G3BF_REP1_REP2_pooled_q0.01_peak_128
c	hr1 37299937 37300276 340 37300016 15.00 4.61463 2.87296 2.08	535 E11.5_MANP_CHIP_G3BF_REP1_REP2_pooled_q0.01_peak_129a
c	hr1 37299937 37300276 340 37300193 11.00 4.64076 3.27943 2.08	535 E11.5_MANP_CHIP_G3BF_REP1_REP2_pooled_q0.01_peak_129b
c	hr1 37430252 37430683 432 37430332 19.00 10.28788 5.10498 7.3	1436 E11.5_MANP_CHIP_G3BF_REP1_REP2_pooled_q0.01_peak_130a
c	hr1 37430252 37430683 432 37430574 16.00 7.43893 4.13398 4.67	599 E11.5_MANP_CHIP_G3BF_REP1_REP2_pooled_q0.01_peak_130b
c	hr1 37540691 37540971 281 37540761 16.00 6.06792 3.45779 3.38	153 E11.5_MANP_CHIP_G3BF_REP1_REP2_pooled_q0.01_peak_131a
c	hr1 37540691 37540971 281 37540897 16.00 8.41648 4.64586 5.55	904 E11.5_MANP_CHIP_G3BF_REP1_REP2_pooled_q0.01_peak_131b
c	hr1 37864642 37864871 230 37864748 17.00 9.25085 4.91915 6.33	859 E11.5_MANP_CHIP_G3BF_REP1_REP2_pooled_q0.01_peak_132
c	hr1 37890447 37890656 210 37890546 21.00 12.80816 6.01229 9.6	8985 E11.5_MANP_CHIP_G3BF_REP1_REP2_pooled_q0.01_peak_133
c	hr1 37996980 37997253 274 37997107 28.00 19.74358 7.92529 16.	30083 E11.5_MANP_CHIP_G3BF_REP1_REP2_pooled_q0.01_peak_134
c	hr1 37997987 37998546 560 37998245 21.00 11.10059 5.15985 8.0	7674 E11.5_MANP_CHIP_G3BF_REP1_REP2_pooled_q0.01_peak_135
c	hr1 38129170 38129728 559 38129511 28.00 19.74358 7.92529 16.	30083 E11.5_MANP_CHIP_G3BF_REP1_REP2_pooled_q0.01_peak_136
c	hr1 38607116 38607287 172 38607203 14.00 6.82220 4.09929 4.07	683 E11.5_MANP_CHIP_G3BF_REP1_REP2_pooled_q0.01_peak_137
c	hr1 38627061 38627355 295 38627160 17.00 9.25085 4.91915 6.33	859 E11.5_MANP_CHIP_G3BF_REP1_REP2_pooled_q0.01_peak_138
c	hr1 38627695 38627994 300 38627781 15.00 7.60646 4.37258 4.80	472 E11.5_MANP_CHIP_G3BF_REP1_REP2_pooled_q0.01_peak_139a
c	hr1 38627695 38627994 300 38627903 19.00 9.45664 4.69077 6.53	596 E11.5_MANP_CHIP_G3BF_REP1_REP2_pooled_q0.01_peak_139b
c	hr1 38757832 38758149 318 38757991 36.00 28.54655 10.11158 24	.80025 E11.5_MANP_CHIP_G3BF_REP1_REP2_pooled_q0.01_peak_140
c	hr1 38897959 38898139 181 38898050 14.00 6.82220 4.09929 4.07	683 E11.5_MANP_CHIP_G3BF_REP1_REP2_pooled_q0.01_peak_141
c	hr1 38939683 38939857 175 38939771 20.00 11.88794 5.73901 8.8	1922 E11.5_MANP_CHIP_G3BF_REP1_REP2_pooled_q0.01_peak_142
c	hr1 38987813 38988185 373 38988062 18.00 10.10829 5.19243 7.1	4298 E11.5_MANP_CHIP_G3BF_REP1_REP2_pooled_q0.01_peak_143
c	hr1 39367809 39368589 781 39367966 25.00 16.07442 6.80542 12.	80246 E11.5_MANP_CHIP_G3BF_REP1_REP2_pooled_q0.01_peak_144a
c	hr1 39367809 39368589 781 39368406 20.00 8.87424 4.27139 6.00	180 E11.5_MANP_CHIP_G3BF_REP1_REP2_pooled_q0.01_peak_144b
c	hr1 39478283 39478723 441 39478630 14.00 6.82220 4.09929 4.07	683 E11.5_MANP_CHIP_G3BF_REP1_REP2_pooled_q0.01_peak_145
c	hr1 39535770 39536209 440 39535950 40.00 33.23634 11.20473 29	.35288 E11.5_MANP_CHIP_G3BF_REP1_REP2_pooled_q0.01_peak_146
c	hr1 39576530 39577691 1162 39576942 38.00 30.86952 10.65815 2	7.05543 E11.5_MANP_CHIP_G3BF_REP1_REP2_pooled_q0.01_peak_147a
c	hr1 39576530 39577691 1162 39577241 35.00 27.40221 9.83829 23	.69099 E11.5_MANP_CHIP_G3BF_REP1_REP2_pooled_q0.01_peak_147b
c	hr1 39576530 39577691 1162 39577665 12.00 5.33746 3.55272 2.7	1634 E11.5_MANP_CHIP_G3BF_REP1_REP2_pooled_q0.01_peak_147c
c	hr1 39747214 39747512 299 39747319 20.00 11.88794 5.73901 8.8	1922 E11.5_MANP_CHIP_G3BF_REP1_REP2_pooled_q0.01_peak_148
c	hr1 39900313 39900877 565 39900454 27.00 18.70449 7.65201 15.	30417 E11.5_MANP_CHIP_G3BF_REP1_REP2_pooled_q0.01_peak_149a
c	hr1 39900313 39900877 565 39900672 36.00 28.54655 10.11158 24	.80025 E11.5_MANP_CHIP_G3BF_REP1_REP2_pooled_q0.01_peak_149b
c	hr1 39900956 39901760 805 39901197 34.00 26.26973 9.56501 22.	59474 E11.5_MANP_CHIP_G3BF_REP1_REP2_pooled_q0.01_peak_150a
c	hr1 39900956 39901760 805 39901489 26.00 16.70029 6.89173 13.	38561 E11.5_MANP_CHIP_G3BF_REP1_REP2_pooled_q0.01_peak_150b
c	hr1 39900956 39901760 805 39901664 25.00 14.61092 6.09800 11.	41868 E11.5_MANP_CHIP_G3BF_REP1_REP2_pooled_q0.01_peak_150c
c	hr1 41275125 41275310 186 41275225 12.00 5.33746 3.55272 2.71	634 E11.5_MANP_CHIP_G3BF_REP1_REP2_pooled_q0.01_peak_151
c	hr1 41327008 41327350 343 41327248 24.00 15.68020 6.83215 12.	41189 E11.5_MANP_CHIP_G3BF_REP1_REP2_pooled_q0.01_peak_152
c	hr1 42215443 42215674 232 42215544 25.00 10.11742 4.17878 7.1	5153 E11.5_MANP_CHIP_G3BF_REP1_REP2_pooled_q0.01_peak_153
c	hr1 42436508 42436695 188 42436593 23.00 12.82070 5.62892 9.6	9682 E11.5_MANP_CHIP_G3BF_REP1_REP2_pooled_q0.01_peak_154
c	hr1 42686707 42686896 190 42686828 13.00 6.06527 3.82600 3.38	153 E11.5_MANP_CHIP_G3BF_REP1_REP2_pooled_q0.01_peak_155
c	hr1 42695790 42695938 149 42695892 11.00 4.64076 3.27943 2.08	535 E11.5_MANP_CHIP_G3BF_REP1_REP2_pooled_q0.01_peak_156
c	hr1 42696369 42696548 180 42696460 17.00 9.25085 4.91915 6.33	859 E11.5_MANP_CHIP_G3BF_REP1_REP2_pooled_q0.01_peak_157
c	hr1 42851129 42851473 345 42851345 27.00 18.70449 7.65201 15.	30417 E11.5_MANP_CHIP_G3BF_REP1_REP2_pooled_q0.01_peak_158
c	hr1 42952751 42953523 773 42952957 16.00 8.41648 4.64586 5.55	904 E11.5_MANP_CHIP_G3BF_REP1_REP2_pooled_q0.01_peak_159a
c	hr1 42952751 42953523 773 42953211 27.00 18.70449 7.65201 15.	30417 E11.5_MANP_CHIP_G3BF_REP1_REP2_pooled_q0.01_peak_159b
c	hr1 43092220 43092435 216 43092359 18.00 10.10829 5.19243 7.1	4298 E11.5_MANP_CHIP_G3BF_REP1_REP2_pooled_q0.01_peak_160
c	hr1 43098257 43098921 665 43098327 13.00 6.06527 3.82600 3.38	153 E11.5_MANP_CHIP_G3BF_REP1_REP2_pooled_q0.01_peak_161a
c	hr1 43098257 43098921 665 43098604 30.00 21.86518 8.47186 18.	34202 E11.5_MANP_CHIP_G3BF_REP1_REP2_pooled_q0.01_peak_161b
c	hr1 43098257 43098921 665 43098818 21.00 12.80816 6.01229 9.6	8985 E11.5_MANP_CHIP_G3BF_REP1_REP2_pooled_q0.01_peak_161c
c	hr1 43445151 43446875 1725 43445550 82.00 83.35843 19.46670 7	8.66670 E11.5_MANP_CHIP_G3BF_REP1_REP2_pooled_q0.01_peak_162a
c	hr1 43445151 43446875 1725 43445999 34.00 26.26973 9.56501 22	.59474 E11.5_MANP_CHIP_G3BF_REP1_REP2_pooled_q0.01_peak_162b
c	hr1 43445151 43446875 1725 43446307 19.00 10.98767 5.46572 7.	97026 E11.5_MANP_CHIP_G3BF_REP1_REP2_pooled_q0.01_peak_162c
c	hr1 43445151 43446875 1725 43446643 15.00 7.60646 4.37258 4.8	0472 E11.5_MANP_CHIP_G3BF_REP1_REP2_pooled_q0.01_peak_162d
c	hr1 43676721 43676885 165 43676805 16.00 8.41648 4.64586 5.55	904 E11.5_MANP_CHIP_G3BF_REP1_REP2_pooled_q0.01_peak_163
c	hr1 43827382 43827753 372 43827579 27.00 16.98057 6.80891 13.	66485 E11.5_MANP_CHIP_G3BF_REP1_REP2_pooled_q0.01_peak_164
c	hr1 43827884 43828173 290 43827999 22.00 12.92761 5.87073 9.7	9838 E11.5_MANP_CHIP_G3BF_REP1_REP2_pooled_q0.01_peak_165
c	hr1 43933966 43934564 599 43934247 41.00 30.95509 9.85062 27.	13732 E11.5_MANP_CHIP_G3BF_REP1_REP2_pooled_q0.01_peak_166
c	hr1 44102116 44102447 332 44102248 15.00 7.60646 4.37258 4.80	472 E11.5_MANP_CHIP_G3BF_REP1_REP2_pooled_q0.01_peak_167a
c	hr1 44102116 44102447 332 44102358 14.00 6.82220 4.09929 4.07	683 E11.5_MANP_CHIP_G3BF_REP1_REP2_pooled_q0.01_peak_167b
c	hr1 44118465 44118827 363 44118688 21.00 12.80816 6.01229 9.6	8985 E11.5_MANP_CHIP_G3BF_REP1_REP2_pooled_q0.01_peak_168
c	hr1 44119156 44120015 860 44119394 21.00 12.80816 6.01229 9.6	8985 E11.5_MANP_CHIP_G3BF_REP1_REP2_pooled_q0.01_peak_169a
c	hr1 44119156 44120015 860 44119642 23.00 14.70505 6.55886 11.	48259 E11.5_MANP_CHIP_G3BF_REP1_REP2_pooled_q0.01_peak_169b
c	hr1 44119156 44120015 860 44119903 20.00 11.88794 5.73901 8.8	1922 E11.5_MANP_CHIP_G3BF_REP1_REP2_pooled_q0.01_peak_169c
c	hr1 44147734 44148244 511 44147999 29.00 14.54405 5.38680 11.	35712 E11.5_MANP_CHIP_G3BF_REP1_REP2_pooled_q0.01_peak_170
c	hr1 44551528 44551720 193 44551667 13.00 6.06527 3.82600 3.38	153 E11.5_MANP_CHIP_G3BF_REP1_REP2_pooled_q0.01_peak_171
c	hr1 44551832 44552540 709 44551974 16.00 8.41648 4.64586 5.55	904 E11.5_MANP_CHIP_G3BF_REP1_REP2_pooled_q0.01_peak_172a
c	hr1 44551832 44552540 709 44552197 20.00 11.88794 5.73901 8.8	1922 E11.5_MANP_CHIP_G3BF_REP1_REP2_pooled_q0.01_peak_172b
c	hr1 44551832 44552540 709 44552409 14.00 6.82220 4.09929 4.07	683 E11.5_MANP_CHIP_G3BF_REP1_REP2_pooled_q0.01_peak_172c
c	hr1 44951120 44951394 275 44951249 60.00 58.93180 16.67044 54	.53807 E11.5_MANP_CHIP_G3BF_REP1_REP2_pooled_q0.01_peak_173
c	hr1 45311645 45311823 179 45311748 12.00 5.33746 3.55272 2.71	634 E11.5_MANP_CHIP_G3BF_REP1_REP2_pooled_q0.01_peak_174
c	hr1 45316780 45317066 287 45316942 20.00 6.78582 3.37517 4.07	683 E11.5_MANP_CHIP_G3BF_REP1_REP2_pooled_q0.01_peak_175
c	hr1 45502431 45502579 149 45502469 11.00 4.64076 3.27943 2.08	535 E11.5_MANP_CHIP_G3BF_REP1_REP2_pooled_q0.01_peak_176
c	hr1 45761457 45761694 238 45761529 11.00 4.64076 3.27943 2.08	535 E11.5_MANP_CHIP_G3BF_REP1_REP2_pooled_q0.01_peak_177
c	hr1 45795262 45795648 387 45795381 15.00 7.60646 4.37258 4.80	472 E11.5_MANP_CHIP_G3BF_REP1_REP2_pooled_q0.01_peak_178
c	hr1 46066789 46067170 382 46067038 19.00 10.98767 5.46572 7.9	7026 E11.5_MANP_CHIP_G3BF_REP1_REP2_pooled_q0.01_peak_179
c	hr1 46852874 46853535 662 46853029 32.00 24.04164 9.01844 20.	43975 E11.5_MANP_CHIP_G3BF_REP1_REP2_pooled_q0.01_peak_180a
c	hr1 46852874 46853535 662 46853335 34.00 26.26973 9.56501 22.	59474 E11.5_MANP_CHIP_G3BF_REP1_REP2_pooled_q0.01_peak_180b
c	hr1 46853941 46854180 240 46853990 13.00 6.06527 3.82600 3.38	153 E11.5_MANP_CHIP_G3BF_REP1_REP2_pooled_q0.01_peak_181
c	hr1 51478233 51478465 233 51478369 20.00 11.88794 5.73901 8.8	1922 E11.5_MANP_CHIP_G3BF_REP1_REP2_pooled_q0.01_peak_182
c	hr1 51914942 51916108 1167 51915028 14.00 6.82220 4.09929 4.0	7683 E11.5_MANP_CHIP_G3BF_REP1_REP2_pooled_q0.01_peak_183a
c	hr1 51914942 51916108 1167 51915334 43.00 36.86421 12.02458 3	2.89013 E11.5_MANP_CHIP_G3BF_REP1_REP2_pooled_q0.01_peak_183b
c	hr1 51914942 51916108 1167 51915894 20.00 10.26867 4.92531 7.	29611 E11.5_MANP_CHIP_G3BF_REP1_REP2_pooled_q0.01_peak_183c
c	hr1 52231948 52232759 812 52232243 18.00 10.10829 5.19243 7.1	4298 E11.5_MANP_CHIP_G3BF_REP1_REP2_pooled_q0.01_peak_184a
c	hr1 52231948 52232759 812 52232422 22.00 10.40017 4.67819 7.4	2281 E11.5_MANP_CHIP_G3BF_REP1_REP2_pooled_q0.01_peak_184b
c	hr1 52231948 52232759 812 52232681 16.00 6.72711 3.77670 4.02	401 E11.5_MANP_CHIP_G3BF_REP1_REP2_pooled_q0.01_peak_184c
c	hr1 52232959 52233275 317 52233132 29.00 13.07706 4.82167 9.9	4660 E11.5_MANP_CHIP_G3BF_REP1_REP2_pooled_q0.01_peak_185
c	hr1 52524145 52524475 331 52524226 14.00 6.82220 4.09929 4.07	683 E11.5_MANP_CHIP_G3BF_REP1_REP2_pooled_q0.01_peak_186
c	hr1 52549642 52549865 224 52549749 27.00 18.70449 7.65201 15.	30417 E11.5_MANP_CHIP_G3BF_REP1_REP2_pooled_q0.01_peak_187
c	hr1 52630723 52631040 318 52630849 14.00 5.73077 3.51808 3.09	497 E11.5_MANP_CHIP_G3BF_REP1_REP2_pooled_q0.01_peak_188
c	hr1 52727160 52727308 149 52727246 15.00 6.42739 3.75262 3.72	916 E11.5_MANP_CHIP_G3BF_REP1_REP2_pooled_q0.01_peak_189
c	hr1 52817114 52817852 739 52817379 23.00 14.70505 6.55886 11.	48259 E11.5_MANP_CHIP_G3BF_REP1_REP2_pooled_q0.01_peak_190a
c	hr1 52817114 52817852 739 52817611 16.00 6.06792 3.45779 3.38	153 E11.5_MANP_CHIP_G3BF_REP1_REP2_pooled_q0.01_peak_190b
c	hr1 52845161 52845410 250 52845237 14.00 5.73077 3.51808 3.09	497 E11.5_MANP_CHIP_G3BF_REP1_REP2_pooled_q0.01_peak_191
c	hr1 53296846 53297032 187 53296931 22.00 11.95153 5.39439 8.8	7686 E11.5_MANP_CHIP_G3BF_REP1_REP2_pooled_q0.01_peak_192
c	hr1 53297166 53297332 167 53297242 15.00 7.60646 4.37258 4.80	472 E11.5_MANP_CHIP_G3BF_REP1_REP2_pooled_q0.01_peak_193
c	hr1 53313562 53313838 277 53313708 18.00 10.10829 5.19243 7.1	4298 E11.5_MANP_CHIP_G3BF_REP1_REP2_pooled_q0.01_peak_194
c	hr1 53352453 53352656 204 53352536 20.00 11.88794 5.73901 8.8	1922 E11.5_MANP_CHIP_G3BF_REP1_REP2_pooled_q0.01_peak_195
c	hr1 53706666 53706887 222 53706730 14.00 5.73077 3.51808 3.09	497 E11.5_MANP_CHIP_G3BF_REP1_REP2_pooled_q0.01_peak_196
c	hr1 53784843 53785202 360 53785113 21.00 9.62773 4.47479 6.70	316 E11.5_MANP_CHIP_G3BF_REP1_REP2_pooled_q0.01_peak_197
c	hr1 54194782 54195201 420 54194989 12.00 5.33746 3.55272 2.71	634 E11.5_MANP_CHIP_G3BF_REP1_REP2_pooled_q0.01_peak_198
c	hr1 54438437 54439112 676 54438559 20.00 8.87424 4.27139 6.00	180 E11.5_MANP_CHIP_G3BF_REP1_REP2_pooled_q0.01_peak_199a
c	hr1 54438437 54439112 676 54438756 24.00 14.78019 6.38123 11.	55643 E11.5_MANP_CHIP_G3BF_REP1_REP2_pooled_q0.01_peak_199b
c	hr1 54438437 54439112 676 54438955 31.00 21.76575 8.16797 18.	26808 E11.5_MANP_CHIP_G3BF_REP1_REP2_pooled_q0.01_peak_199c
c	hr1 54906965 54907257 293 54907177 17.00 9.25085 4.91915 6.33	859 E11.5_MANP_CHIP_G3BF_REP1_REP2_pooled_q0.01_peak_200
c	hr1 54925800 54926340 541 54925928 19.00 10.98767 5.46572 7.9	7026 E11.5_MANP_CHIP_G3BF_REP1_REP2_pooled_q0.01_peak_201a
c	hr1 54925800 54926340 541 54926220 24.00 15.68020 6.83215 12.	41189 E11.5_MANP_CHIP_G3BF_REP1_REP2_pooled_q0.01_peak_201b
c	hr1 54926463 54926780 318 54926541 23.00 12.82070 5.62892 9.6	9682 E11.5_MANP_CHIP_G3BF_REP1_REP2_pooled_q0.01_peak_202
c	hr1 54931354 54931618 265 54931476 22.00 13.74746 6.28558 10.	57194 E11.5_MANP_CHIP_G3BF_REP1_REP2_pooled_q0.01_peak_203
c	hr1 54980482 54980673 192 54980588 13.00 6.06527 3.82600 3.38	153 E11.5_MANP_CHIP_G3BF_REP1_REP2_pooled_q0.01_peak_204
c	hr1 54981990 54982145 156 54982070 18.00 10.10829 5.19243 7.1	4298 E11.5_MANP_CHIP_G3BF_REP1_REP2_pooled_q0.01_peak_205
c	hr1 55026600 55027651 1052 55027091 48.00 35.39799 9.96658 31	.47703 E11.5_MANP_CHIP_G3BF_REP1_REP2_pooled_q0.01_peak_206a
c	hr1 55026600 55027651 1052 55027260 62.00 51.61861 12.81418 4	7.34862 E11.5_MANP_CHIP_G3BF_REP1_REP2_pooled_q0.01_peak_206b
c	hr1 55052881 55053272 392 55052976 25.00 16.67223 7.10544 13.	35840 E11.5_MANP_CHIP_G3BF_REP1_REP2_pooled_q0.01_peak_207a
c	hr1 55052881 55053272 392 55053169 17.00 9.25085 4.91915 6.33	859 E11.5_MANP_CHIP_G3BF_REP1_REP2_pooled_q0.01_peak_207b
c	hr1 55087023 55088684 1662 55087376 22.00 13.53623 6.17744 10	.40137 E11.5_MANP_CHIP_G3BF_REP1_REP2_pooled_q0.01_peak_208a
c	hr1 55087023 55088684 1662 55087720 46.00 33.21080 9.55978 29	.34756 E11.5_MANP_CHIP_G3BF_REP1_REP2_pooled_q0.01_peak_208b
c	hr1 55087023 55088684 1662 55088062 47.00 37.82338 11.25785 3	3.83892 E11.5_MANP_CHIP_G3BF_REP1_REP2_pooled_q0.01_peak_208c
c	hr1 55087023 55088684 1662 55088455 20.00 11.88794 5.73901 8.	81922 E11.5_MANP_CHIP_G3BF_REP1_REP2_pooled_q0.01_peak_208d
c	hr1 55130950 55132258 1309 55131369 48.00 39.00049 11.49239 3	4.98802 E11.5_MANP_CHIP_G3BF_REP1_REP2_pooled_q0.01_peak_209a
c	hr1 55130950 55132258 1309 55131639 39.00 29.50605 9.72702 25	.74769 E11.5_MANP_CHIP_G3BF_REP1_REP2_pooled_q0.01_peak_209b
c	hr1 55130950 55132258 1309 55131967 16.00 6.06792 3.45779 3.3	8153 E11.5_MANP_CHIP_G3BF_REP1_REP2_pooled_q0.01_peak_209c
c	hr1 55130950 55132258 1309 55132163 20.00 11.88794 5.73901 8.	81922 E11.5_MANP_CHIP_G3BF_REP1_REP2_pooled_q0.01_peak_209d
c	hr1 55224112 55224427 316 55224249 19.00 10.98767 5.46572 7.9	7026 E11.5_MANP_CHIP_G3BF_REP1_REP2_pooled_q0.01_peak_210
c	hr1 55406190 55406338 149 55406239 12.00 5.33746 3.55272 2.71	634 E11.5_MANP_CHIP_G3BF_REP1_REP2_pooled_q0.01_peak_211
c	hr1 56016784 56017057 274 56016930 50.00 45.66067 13.93758 41	.49469 E11.5_MANP_CHIP_G3BF_REP1_REP2_pooled_q0.01_peak_212
c	hr1 56286591 56287119 529 56286840 54.00 50.87638 15.03073 46	.61304 E11.5_MANP_CHIP_G3BF_REP1_REP2_pooled_q0.01_peak_213
c	hr1 56865329 56865507 179 56865484 11.00 4.64076 3.27943 2.08	535 E11.5_MANP_CHIP_G3BF_REP1_REP2_pooled_q0.01_peak_214
c	hr1 56969541 56969795 255 56969652 17.00 9.25085 4.91915 6.33	859 E11.5_MANP_CHIP_G3BF_REP1_REP2_pooled_q0.01_peak_215
c	hr1 56969908 56970067 160 56970004 15.00 7.60646 4.37258 4.80	472 E11.5_MANP_CHIP_G3BF_REP1_REP2_pooled_q0.01_peak_216
c	hr1 56972029 56973359 1331 56972189 17.00 9.25085 4.91915 6.3	3859 E11.5_MANP_CHIP_G3BF_REP1_REP2_pooled_q0.01_peak_217a
c	hr1 56972029 56973359 1331 56972609 20.00 8.87424 4.27139 6.0	0180 E11.5_MANP_CHIP_G3BF_REP1_REP2_pooled_q0.01_peak_217b
c	hr1 56972029 56973359 1331 56972964 28.00 17.41656 6.80162 14	.08928 E11.5_MANP_CHIP_G3BF_REP1_REP2_pooled_q0.01_peak_217c
c	hr1 56973521 56973771 251 56973684 11.00 4.54195 3.22301 2.03	764 E11.5_MANP_CHIP_G3BF_REP1_REP2_pooled_q0.01_peak_218
c	hr1 57222941 57223103 163 57223048 21.00 12.80816 6.01229 9.6	8985 E11.5_MANP_CHIP_G3BF_REP1_REP2_pooled_q0.01_peak_219
c	hr1 57377633 57378031 399 57377753 21.00 12.60720 5.90886 9.5	2120 E11.5_MANP_CHIP_G3BF_REP1_REP2_pooled_q0.01_peak_220
c	hr1 57406097 57407158 1062 57406593 33.00 20.72483 7.24051 17	.26723 E11.5_MANP_CHIP_G3BF_REP1_REP2_pooled_q0.01_peak_221a
c	hr1 57406097 57407158 1062 57406766 34.00 15.57427 5.09117 12	.33512 E11.5_MANP_CHIP_G3BF_REP1_REP2_pooled_q0.01_peak_221b
c	hr1 57406097 57407158 1062 57407013 30.00 15.37788 5.56636 12	.14984 E11.5_MANP_CHIP_G3BF_REP1_REP2_pooled_q0.01_peak_221c
c	hr1 57774204 57774456 253 57774304 11.00 4.64076 3.27943 2.08	535 E11.5_MANP_CHIP_G3BF_REP1_REP2_pooled_q0.01_peak_222
c	hr1 57774736 57775361 626 57774851 23.00 9.85413 4.30944 6.92	564 E11.5_MANP_CHIP_G3BF_REP1_REP2_pooled_q0.01_peak_223a
c	hr1 57774736 57775361 626 57775080 33.00 25.14942 9.29172 21.	51036 E11.5_MANP_CHIP_G3BF_REP1_REP2_pooled_q0.01_peak_223b
c	hr1 57775461 57775669 209 57775535 11.00 4.64076 3.27943 2.08	535 E11.5_MANP_CHIP_G3BF_REP1_REP2_pooled_q0.01_peak_224
c	hr1 57969538 57970117 580 57969952 37.00 27.78014 9.46451 24.	06287 E11.5_MANP_CHIP_G3BF_REP1_REP2_pooled_q0.01_peak_225
c	hr1 57995631 57995830 200 57995725 11.00 4.64076 3.27943 2.08	535 E11.5_MANP_CHIP_G3BF_REP1_REP2_pooled_q0.01_peak_226
c	hr1 57995932 57996399 468 57996033 15.00 7.60646 4.37258 4.80	472 E11.5_MANP_CHIP_G3BF_REP1_REP2_pooled_q0.01_peak_227a
c	hr1 57995932 57996399 468 57996157 15.00 7.60646 4.37258 4.80	472 E11.5_MANP_CHIP_G3BF_REP1_REP2_pooled_q0.01_peak_227b
c	hr1 57995932 57996399 468 57996310 16.00 6.06792 3.45779 3.38	153 E11.5_MANP_CHIP_G3BF_REP1_REP2_pooled_q0.01_peak_227c
c	hr1 58392423 58393331 909 58392506 15.00 7.60646 4.37258 4.80	472 E11.5_MANP_CHIP_G3BF_REP1_REP2_pooled_q0.01_peak_228a
c	hr1 58392423 58393331 909 58392697 23.00 14.70505 6.55886 11.	48259 E11.5_MANP_CHIP_G3BF_REP1_REP2_pooled_q0.01_peak_228b
c	hr1 58392423 58393331 909 58392913 24.00 15.68020 6.83215 12.	41189 E11.5_MANP_CHIP_G3BF_REP1_REP2_pooled_q0.01_peak_228c
c	hr1 58392423 58393331 909 58393223 30.00 21.86518 8.47186 18.	34202 E11.5_MANP_CHIP_G3BF_REP1_REP2_pooled_q0.01_peak_228d
c	hr1 58393516 58393767 252 58393677 19.00 10.98767 5.46572 7.9	7026 E11.5_MANP_CHIP_G3BF_REP1_REP2_pooled_q0.01_peak_229
c	hr1 58423329 58424044 716 58423414 19.00 10.98767 5.46572 7.9	7026 E11.5_MANP_CHIP_G3BF_REP1_REP2_pooled_q0.01_peak_230a
c	hr1 58423329 58424044 716 58423647 39.00 32.04759 10.93144 28	.20100 E11.5_MANP_CHIP_G3BF_REP1_REP2_pooled_q0.01_peak_230b
c	hr1 58445149 58445920 772 58445260 14.00 6.82220 4.09929 4.07	683 E11.5_MANP_CHIP_G3BF_REP1_REP2_pooled_q0.01_peak_231a
c	hr1 58445149 58445920 772 58445475 17.00 9.25085 4.91915 6.33	859 E11.5_MANP_CHIP_G3BF_REP1_REP2_pooled_q0.01_peak_231b
c	hr1 58445149 58445920 772 58445689 14.00 6.82220 4.09929 4.07	683 E11.5_MANP_CHIP_G3BF_REP1_REP2_pooled_q0.01_peak_231c
c	hr1 58504555 58504984 430 58504672 24.00 15.68020 6.83215 12.	41189 E11.5_MANP_CHIP_G3BF_REP1_REP2_pooled_q0.01_peak_232
c	hr1 58505070 58505440 371 58505266 18.00 10.10829 5.19243 7.1	4298 E11.5_MANP_CHIP_G3BF_REP1_REP2_pooled_q0.01_peak_233
c	hr1 58586270 58586548 279 58586462 20.00 11.88794 5.73901 8.8	1922 E11.5_MANP_CHIP_G3BF_REP1_REP2_pooled_q0.01_peak_234
c	hr1 58711344 58711828 485 58711513 21.00 9.62773 4.47479 6.70	316 E11.5_MANP_CHIP_G3BF_REP1_REP2_pooled_q0.01_peak_235
c	hr1 58713245 58713479 235 58713388 15.00 7.60646 4.37258 4.80	472 E11.5_MANP_CHIP_G3BF_REP1_REP2_pooled_q0.01_peak_236
c	hr1 58973154 58973350 197 58973254 13.00 4.72869 3.11022 2.17	292 E11.5_MANP_CHIP_G3BF_REP1_REP2_pooled_q0.01_peak_237
c	hr1 58973572 58974004 433 58973669 19.00 9.57980 4.75114 6.65	842 E11.5_MANP_CHIP_G3BF_REP1_REP2_pooled_q0.01_peak_238a
c	hr1 58973572 58974004 433 58973889 19.00 8.14055 4.06799 5.32	214 E11.5_MANP_CHIP_G3BF_REP1_REP2_pooled_q0.01_peak_238b
c	hr1 59119868 59120562 695 59119957 23.00 14.70505 6.55886 11.	48259 E11.5_MANP_CHIP_G3BF_REP1_REP2_pooled_q0.01_peak_239a
c	hr1 59119868 59120562 695 59120166 21.00 12.80816 6.01229 9.6	8985 E11.5_MANP_CHIP_G3BF_REP1_REP2_pooled_q0.01_peak_239b
c	hr1 59119868 59120562 695 59120394 18.00 10.10829 5.19243 7.1	4298 E11.5_MANP_CHIP_G3BF_REP1_REP2_pooled_q0.01_peak_239c
c	hr1 59237002 59237233 232 59237100 28.00 17.41656 6.80162 14.	08928 E11.5_MANP_CHIP_G3BF_REP1_REP2_pooled_q0.01_peak_240
c	hr1 59315604 59315762 159 59315688 13.00 6.06527 3.82600 3.38	153 E11.5_MANP_CHIP_G3BF_REP1_REP2_pooled_q0.01_peak_241
c	hr1 59376044 59376518 475 59376392 23.00 13.84513 6.12598 10.	66850 E11.5_MANP_CHIP_G3BF_REP1_REP2_pooled_q0.01_peak_242
c	hr1 59423589 59423756 168 59423665 15.00 7.60646 4.37258 4.80	472 E11.5_MANP_CHIP_G3BF_REP1_REP2_pooled_q0.01_peak_243
c	hr1 59464717 59464891 175 59464799 18.00 10.10829 5.19243 7.1	4298 E11.5_MANP_CHIP_G3BF_REP1_REP2_pooled_q0.01_peak_244
c	hr1 59481153 59481577 425 59481345 19.00 10.98767 5.46572 7.9	7026 E11.5_MANP_CHIP_G3BF_REP1_REP2_pooled_q0.01_peak_245
c	hr1 59482102 59483053 952 59482278 31.00 22.94677 8.74515 19.	38261 E11.5_MANP_CHIP_G3BF_REP1_REP2_pooled_q0.01_peak_246a
c	hr1 59482102 59483053 952 59482461 26.00 17.68052 7.37872 14.	32329 E11.5_MANP_CHIP_G3BF_REP1_REP2_pooled_q0.01_peak_246b
c	hr1 59482102 59483053 952 59482785 20.00 10.26867 4.92531 7.2	9611 E11.5_MANP_CHIP_G3BF_REP1_REP2_pooled_q0.01_peak_246c
c	hr1 59483244 59483705 462 59483606 16.00 5.19348 3.05252 2.61	892 E11.5_MANP_CHIP_G3BF_REP1_REP2_pooled_q0.01_peak_247
c	hr1 59483817 59484162 346 59484152 13.00 5.06128 3.28354 2.49	038 E11.5_MANP_CHIP_G3BF_REP1_REP2_pooled_q0.01_peak_248
c	hr1 59515570 59515765 196 59515667 20.00 11.88794 5.73901 8.8	1922 E11.5_MANP_CHIP_G3BF_REP1_REP2_pooled_q0.01_peak_249
c	hr1 59553571 59553983 413 59553815 26.00 13.66477 5.49179 10.	52614 E11.5_MANP_CHIP_G3BF_REP1_REP2_pooled_q0.01_peak_250
c	hr1 59670057 59671315 1259 59670300 30.00 17.17986 6.30539 13	.85869 E11.5_MANP_CHIP_G3BF_REP1_REP2_pooled_q0.01_peak_251a
c	hr1 59670057 59671315 1259 59670465 28.00 19.74358 7.92529 16	.30083 E11.5_MANP_CHIP_G3BF_REP1_REP2_pooled_q0.01_peak_251b
c	hr1 59670057 59671315 1259 59670683 40.00 31.69346 10.46522 2	7.86898 E11.5_MANP_CHIP_G3BF_REP1_REP2_pooled_q0.01_peak_251c
c	hr1 59670057 59671315 1259 59671001 38.00 27.65545 9.14700 23	.93954 E11.5_MANP_CHIP_G3BF_REP1_REP2_pooled_q0.01_peak_251d
c	hr1 59684990 59685561 572 59685097 19.00 10.98767 5.46572 7.9	7026 E11.5_MANP_CHIP_G3BF_REP1_REP2_pooled_q0.01_peak_252a
c	hr1 59684990 59685561 572 59685423 20.00 11.88794 5.73901 8.8	1922 E11.5_MANP_CHIP_G3BF_REP1_REP2_pooled_q0.01_peak_252b
c	hr1 59685772 59686014 243 59685921 12.00 5.33746 3.55272 2.71	634 E11.5_MANP_CHIP_G3BF_REP1_REP2_pooled_q0.01_peak_253
c	hr1 59762302 59763370 1069 59762495 48.00 43.10269 13.39101 3	8.99024 E11.5_MANP_CHIP_G3BF_REP1_REP2_pooled_q0.01_peak_254a
c	hr1 59762302 59763370 1069 59762926 22.00 11.95153 5.39439 8.	87686 E11.5_MANP_CHIP_G3BF_REP1_REP2_pooled_q0.01_peak_254b
c	hr1 59762302 59763370 1069 59763227 38.00 30.86952 10.65815 2	7.05543 E11.5_MANP_CHIP_G3BF_REP1_REP2_pooled_q0.01_peak_254c
c	hr1 59763456 59764235 780 59763597 33.00 19.96143 6.91559 16.	51522 E11.5_MANP_CHIP_G3BF_REP1_REP2_pooled_q0.01_peak_255a
c	hr1 59763456 59764235 780 59764070 36.00 28.54655 10.11158 24	.80025 E11.5_MANP_CHIP_G3BF_REP1_REP2_pooled_q0.01_peak_255b
c	hr1 59764385 59764582 198 59764472 14.00 6.82220 4.09929 4.07	683 E11.5_MANP_CHIP_G3BF_REP1_REP2_pooled_q0.01_peak_256
c	hr1 59912893 59913472 580 59913085 24.00 15.68020 6.83215 12.	41189 E11.5_MANP_CHIP_G3BF_REP1_REP2_pooled_q0.01_peak_257a
c	hr1 59912893 59913472 580 59913278 25.00 14.61092 6.09800 11.	41868 E11.5_MANP_CHIP_G3BF_REP1_REP2_pooled_q0.01_peak_257b
c	hr1 59913553 59913884 332 59913671 25.00 12.82373 5.28839 9.6	9685 E11.5_MANP_CHIP_G3BF_REP1_REP2_pooled_q0.01_peak_258
c	hr1 60098320 60098754 435 60098483 24.00 15.68020 6.83215 12.	41189 E11.5_MANP_CHIP_G3BF_REP1_REP2_pooled_q0.01_peak_259a
c	hr1 60098320 60098754 435 60098654 19.00 10.98767 5.46572 7.9	7026 E11.5_MANP_CHIP_G3BF_REP1_REP2_pooled_q0.01_peak_259b
c	hr1 60180532 60181159 628 60180683 19.00 8.14055 4.06799 5.32	214 E11.5_MANP_CHIP_G3BF_REP1_REP2_pooled_q0.01_peak_260a
c	hr1 60180532 60181159 628 60181035 23.00 14.70505 6.55886 11.	48259 E11.5_MANP_CHIP_G3BF_REP1_REP2_pooled_q0.01_peak_260b
c	hr1 60343077 60343548 472 60343381 19.00 8.14055 4.06799 5.32	214 E11.5_MANP_CHIP_G3BF_REP1_REP2_pooled_q0.01_peak_261
c	hr1 60409106 60410207 1102 60409408 27.00 18.70449 7.65201 15	.30417 E11.5_MANP_CHIP_G3BF_REP1_REP2_pooled_q0.01_peak_262a
c	hr1 60409106 60410207 1102 60409820 30.00 19.36089 7.27069 15	.94879 E11.5_MANP_CHIP_G3BF_REP1_REP2_pooled_q0.01_peak_262b
c	hr1 60409106 60410207 1102 60410099 23.00 14.70505 6.55886 11	.48259 E11.5_MANP_CHIP_G3BF_REP1_REP2_pooled_q0.01_peak_262c
c	hr1 60566055 60566752 698 60566168 16.00 8.41648 4.64586 5.55	904 E11.5_MANP_CHIP_G3BF_REP1_REP2_pooled_q0.01_peak_263a
c	hr1 60566055 60566752 698 60566472 16.00 8.41648 4.64586 5.55	904 E11.5_MANP_CHIP_G3BF_REP1_REP2_pooled_q0.01_peak_263b
c	hr1 60567075 60567342 268 60567170 15.00 7.60646 4.37258 4.80	472 E11.5_MANP_CHIP_G3BF_REP1_REP2_pooled_q0.01_peak_264
c	hr1 60860664 60860922 259 60860808 49.00 44.37739 13.66430 40	.23867 E11.5_MANP_CHIP_G3BF_REP1_REP2_pooled_q0.01_peak_265
c	hr1 61233453 61234493 1041 61233551 20.00 11.88794 5.73901 8.	81922 E11.5_MANP_CHIP_G3BF_REP1_REP2_pooled_q0.01_peak_266a
c	hr1 61233453 61234493 1041 61233946 17.00 9.25085 4.91915 6.3	3859 E11.5_MANP_CHIP_G3BF_REP1_REP2_pooled_q0.01_peak_266b
c	hr1 61233453 61234493 1041 61234282 21.00 12.80816 6.01229 9.	68985 E11.5_MANP_CHIP_G3BF_REP1_REP2_pooled_q0.01_peak_266c
c	hr1 61715948 61716342 395 61716183 37.00 29.70242 10.38487 25	.92228 E11.5_MANP_CHIP_G3BF_REP1_REP2_pooled_q0.01_peak_267
c	hr1 62016529 62016822 294 62016671 26.00 17.68052 7.37872 14.	32329 E11.5_MANP_CHIP_G3BF_REP1_REP2_pooled_q0.01_peak_268
c	hr1 62412443 62412731 289 62412571 33.00 25.14942 9.29172 21.	51036 E11.5_MANP_CHIP_G3BF_REP1_REP2_pooled_q0.01_peak_269
c	hr1 62703580 62703795 216 62703713 17.00 9.25085 4.91915 6.33	859 E11.5_MANP_CHIP_G3BF_REP1_REP2_pooled_q0.01_peak_270
c	hr1 62706666 62707029 364 62706887 15.00 7.60646 4.37258 4.80	472 E11.5_MANP_CHIP_G3BF_REP1_REP2_pooled_q0.01_peak_271
c	hr1 62901532 62901703 172 62901645 19.00 10.98767 5.46572 7.9	7026 E11.5_MANP_CHIP_G3BF_REP1_REP2_pooled_q0.01_peak_272
c	hr1 62908674 62908949 276 62908824 24.00 15.68020 6.83215 12.	41189 E11.5_MANP_CHIP_G3BF_REP1_REP2_pooled_q0.01_peak_273
c	hr1 63113377 63114601 1225 63113758 69.00 71.48445 19.13002 6	6.92284 E11.5_MANP_CHIP_G3BF_REP1_REP2_pooled_q0.01_peak_274a
c	hr1 63113377 63114601 1225 63114267 81.00 88.98854 22.40945 8	4.24165 E11.5_MANP_CHIP_G3BF_REP1_REP2_pooled_q0.01_peak_274b
c	hr1 63176868 63177531 664 63177029 33.00 25.14942 9.29172 21.	51036 E11.5_MANP_CHIP_G3BF_REP1_REP2_pooled_q0.01_peak_275a
c	hr1 63176868 63177531 664 63177229 28.00 17.41656 6.80162 14.	08928 E11.5_MANP_CHIP_G3BF_REP1_REP2_pooled_q0.01_peak_275b
c	hr1 63273194 63273652 459 63273560 20.00 10.26867 4.92531 7.2	9611 E11.5_MANP_CHIP_G3BF_REP1_REP2_pooled_q0.01_peak_276
c	hr1 63445978 63446261 284 63446011 11.00 4.64076 3.27943 2.08	535 E11.5_MANP_CHIP_G3BF_REP1_REP2_pooled_q0.01_peak_277
c	hr1 63614713 63614910 198 63614793 18.00 10.10829 5.19243 7.1	4298 E11.5_MANP_CHIP_G3BF_REP1_REP2_pooled_q0.01_peak_278
c	hr1 63730588 63730991 404 63730825 18.00 10.10829 5.19243 7.1	4298 E11.5_MANP_CHIP_G3BF_REP1_REP2_pooled_q0.01_peak_279
c	hr1 64121073 64121232 160 64121141 17.00 9.25085 4.91915 6.33	859 E11.5_MANP_CHIP_G3BF_REP1_REP2_pooled_q0.01_peak_280
c	hr1 64121668 64122420 753 64122017 39.00 32.04759 10.93144 28	.20100 E11.5_MANP_CHIP_G3BF_REP1_REP2_pooled_q0.01_peak_281
c	hr1 64374510 64374706 197 64374604 24.00 15.68020 6.83215 12.	41189 E11.5_MANP_CHIP_G3BF_REP1_REP2_pooled_q0.01_peak_282
c	hr1 64532352 64532720 369 64532533 24.00 11.99886 5.08499 8.9	2108 E11.5_MANP_CHIP_G3BF_REP1_REP2_pooled_q0.01_peak_283
c	hr1 64532817 64533284 468 64532971 26.00 17.68052 7.37872 14.	32329 E11.5_MANP_CHIP_G3BF_REP1_REP2_pooled_q0.01_peak_284a
c	hr1 64532817 64533284 468 64533149 34.00 26.26973 9.56501 22.	59474 E11.5_MANP_CHIP_G3BF_REP1_REP2_pooled_q0.01_peak_284b
c	hr1 64533452 64533878 427 64533563 20.00 11.88794 5.73901 8.8	1922 E11.5_MANP_CHIP_G3BF_REP1_REP2_pooled_q0.01_peak_285
c	hr1 64616824 64617926 1103 64617026 24.00 15.44841 6.71461 12	.21472 E11.5_MANP_CHIP_G3BF_REP1_REP2_pooled_q0.01_peak_286a
c	hr1 64616824 64617926 1103 64617410 21.00 12.80816 6.01229 9.	68985 E11.5_MANP_CHIP_G3BF_REP1_REP2_pooled_q0.01_peak_286b
c	hr1 64616824 64617926 1103 64617576 22.00 13.74746 6.28558 10	.57194 E11.5_MANP_CHIP_G3BF_REP1_REP2_pooled_q0.01_peak_286c
c	hr1 64616824 64617926 1103 64617810 22.00 13.74746 6.28558 10	.57194 E11.5_MANP_CHIP_G3BF_REP1_REP2_pooled_q0.01_peak_286d
c	hr1 64690462 64690650 189 64690560 14.00 6.82220 4.09929 4.07	683 E11.5_MANP_CHIP_G3BF_REP1_REP2_pooled_q0.01_peak_287
c	hr1 64691108 64691450 343 64691231 17.00 9.25085 4.91915 6.33	859 E11.5_MANP_CHIP_G3BF_REP1_REP2_pooled_q0.01_peak_288
c	hr1 64736018 64736185 168 64736105 13.00 6.06527 3.82600 3.38	153 E11.5_MANP_CHIP_G3BF_REP1_REP2_pooled_q0.01_peak_289
c	hr1 64956448 64956763 316 64956671 13.00 6.06527 3.82600 3.38	153 E11.5_MANP_CHIP_G3BF_REP1_REP2_pooled_q0.01_peak_290
c	hr1 65178962 65179439 478 65179048 21.00 12.80816 6.01229 9.6	8985 E11.5_MANP_CHIP_G3BF_REP1_REP2_pooled_q0.01_peak_291a
c	hr1 65178962 65179439 478 65179311 18.00 10.10829 5.19243 7.1	4298 E11.5_MANP_CHIP_G3BF_REP1_REP2_pooled_q0.01_peak_291b
c	hr1 65186696 65187055 360 65186891 20.00 11.88794 5.73901 8.8	1922 E11.5_MANP_CHIP_G3BF_REP1_REP2_pooled_q0.01_peak_292
c	hr1 65235510 65235670 161 65235583 16.00 8.41648 4.64586 5.55	904 E11.5_MANP_CHIP_G3BF_REP1_REP2_pooled_q0.01_peak_293
c	hr1 66245676 66245826 151 66245748 14.00 6.82220 4.09929 4.07	683 E11.5_MANP_CHIP_G3BF_REP1_REP2_pooled_q0.01_peak_294
c	hr1 66468011 66468345 335 66468148 34.00 20.91411 7.11899 17.	42805 E11.5_MANP_CHIP_G3BF_REP1_REP2_pooled_q0.01_peak_295
c	hr1 66700813 66701277 465 66700988 14.00 6.82220 4.09929 4.07	683 E11.5_MANP_CHIP_G3BF_REP1_REP2_pooled_q0.01_peak_296a
c	hr1 66700813 66701277 465 66701208 13.00 6.06527 3.82600 3.38	153 E11.5_MANP_CHIP_G3BF_REP1_REP2_pooled_q0.01_peak_296b
c	hr1 66816447 66816941 495 66816831 18.00 10.10829 5.19243 7.1	4298 E11.5_MANP_CHIP_G3BF_REP1_REP2_pooled_q0.01_peak_297
c	hr1 66817153 66817532 380 66817248 21.00 12.80816 6.01229 9.6	8985 E11.5_MANP_CHIP_G3BF_REP1_REP2_pooled_q0.01_peak_298a
c	hr1 66817153 66817532 380 66817426 20.00 11.88794 5.73901 8.8	1922 E11.5_MANP_CHIP_G3BF_REP1_REP2_pooled_q0.01_peak_298b
c	hr1 66863020 66863230 211 66863121 13.00 5.77171 3.66446 3.13	443 E11.5_MANP_CHIP_G3BF_REP1_REP2_pooled_q0.01_peak_299
c	hr1 69105145 69105311 167 69105199 12.00 5.33746 3.55272 2.71	634 E11.5_MANP_CHIP_G3BF_REP1_REP2_pooled_q0.01_peak_300
c	hr1 69241811 69242076 266 69241956 28.00 19.74358 7.92529 16.	30083 E11.5_MANP_CHIP_G3BF_REP1_REP2_pooled_q0.01_peak_301
c	hr1 69456719 69456891 173 69456807 18.00 10.10829 5.19243 7.1	4298 E11.5_MANP_CHIP_G3BF_REP1_REP2_pooled_q0.01_peak_302
c	hr1 69687644 69688001 358 69687752 13.00 6.06527 3.82600 3.38	153 E11.5_MANP_CHIP_G3BF_REP1_REP2_pooled_q0.01_peak_303
c	hr1 69787407 69787680 274 69787505 24.00 13.70739 5.86346 10.	56365 E11.5_MANP_CHIP_G3BF_REP1_REP2_pooled_q0.01_peak_304
c	hr1 70725688 70725859 172 70725772 23.00 14.70505 6.55886 11.	48259 E11.5_MANP_CHIP_G3BF_REP1_REP2_pooled_q0.01_peak_305
c	hr1 71102643 71102989 347 71102806 27.00 18.05574 7.32892 14.	69405 E11.5_MANP_CHIP_G3BF_REP1_REP2_pooled_q0.01_peak_306
c	hr1 71557163 71557457 295 71557282 18.00 10.10829 5.19243 7.1	4298 E11.5_MANP_CHIP_G3BF_REP1_REP2_pooled_q0.01_peak_307
c	hr1 71652557 71653906 1350 71653122 35.00 27.40221 9.83829 23	.69099 E11.5_MANP_CHIP_G3BF_REP1_REP2_pooled_q0.01_peak_308a
c	hr1 71652557 71653906 1350 71653610 16.00 8.41648 4.64586 5.5	5904 E11.5_MANP_CHIP_G3BF_REP1_REP2_pooled_q0.01_peak_308b
c	hr1 72226064 72226691 628 72226436 38.00 27.65545 9.14700 23.	93954 E11.5_MANP_CHIP_G3BF_REP1_REP2_pooled_q0.01_peak_309
c	hr1 72236729 72237227 499 72237020 53.00 45.01389 12.66508 40	.86836 E11.5_MANP_CHIP_G3BF_REP1_REP2_pooled_q0.01_peak_310
c	hr1 72243997 72244729 733 72244274 67.00 68.64951 18.58345 64	.12151 E11.5_MANP_CHIP_G3BF_REP1_REP2_pooled_q0.01_peak_311
c	hr1 72254714 72255620 907 72255240 75.00 80.13430 20.76973 75	.47377 E11.5_MANP_CHIP_G3BF_REP1_REP2_pooled_q0.01_peak_312
c	hr1 72284080 72284375 296 72284201 13.00 6.06527 3.82600 3.38	153 E11.5_MANP_CHIP_G3BF_REP1_REP2_pooled_q0.01_peak_313
c	hr1 72307332 72307743 412 72307583 23.00 14.70505 6.55886 11.	48259 E11.5_MANP_CHIP_G3BF_REP1_REP2_pooled_q0.01_peak_314
c	hr1 72537065 72537281 217 72537167 40.00 29.84470 9.61608 26.	06034 E11.5_MANP_CHIP_G3BF_REP1_REP2_pooled_q0.01_peak_315
c	hr1 72711164 72711771 608 72711400 22.00 12.36345 5.59304 9.2	7996 E11.5_MANP_CHIP_G3BF_REP1_REP2_pooled_q0.01_peak_316a
c	hr1 72711164 72711771 608 72711664 15.00 6.69638 3.89081 3.99	350 E11.5_MANP_CHIP_G3BF_REP1_REP2_pooled_q0.01_peak_316b
c	hr1 72823836 72824147 312 72823945 14.00 5.73077 3.51808 3.09	497 E11.5_MANP_CHIP_G3BF_REP1_REP2_pooled_q0.01_peak_317
c	hr1 72824559 72825032 474 72824740 15.00 7.60646 4.37258 4.80	472 E11.5_MANP_CHIP_G3BF_REP1_REP2_pooled_q0.01_peak_318
c	hr1 73251985 73252286 302 73252174 16.00 8.04724 4.44970 5.23	277 E11.5_MANP_CHIP_G3BF_REP1_REP2_pooled_q0.01_peak_319
c	hr1 73758242 73758642 401 73758607 16.00 7.14960 3.98715 4.39	330 E11.5_MANP_CHIP_G3BF_REP1_REP2_pooled_q0.01_peak_320
c	hr1 73826412 73826562 151 73826487 16.00 8.41648 4.64586 5.55	904 E11.5_MANP_CHIP_G3BF_REP1_REP2_pooled_q0.01_peak_321
c	hr1 74040845 74041019 175 74040923 18.00 9.21770 4.73226 6.33	859 E11.5_MANP_CHIP_G3BF_REP1_REP2_pooled_q0.01_peak_322
c	hr1 74125061 74125402 342 74125263 19.00 10.98767 5.46572 7.9	7026 E11.5_MANP_CHIP_G3BF_REP1_REP2_pooled_q0.01_peak_323
c	hr1 74236582 74237206 625 74236804 26.00 15.53067 6.33254 12.	29179 E11.5_MANP_CHIP_G3BF_REP1_REP2_pooled_q0.01_peak_324a
c	hr1 74236582 74237206 625 74237034 23.00 14.70505 6.55886 11.	48259 E11.5_MANP_CHIP_G3BF_REP1_REP2_pooled_q0.01_peak_324b
c	hr1 74274974 74275304 331 74275119 64.00 36.15851 7.35888 32.	21185 E11.5_MANP_CHIP_G3BF_REP1_REP2_pooled_q0.01_peak_325
c	hr1 74284412 74284663 252 74284547 21.00 12.80816 6.01229 9.6	8985 E11.5_MANP_CHIP_G3BF_REP1_REP2_pooled_q0.01_peak_326
c	hr1 74285096 74285248 153 74285166 18.00 10.10829 5.19243 7.1	4298 E11.5_MANP_CHIP_G3BF_REP1_REP2_pooled_q0.01_peak_327
c	hr1 74386692 74387171 480 74386989 27.00 14.52143 5.69519 11.	33578 E11.5_MANP_CHIP_G3BF_REP1_REP2_pooled_q0.01_peak_328
c	hr1 74391314 74392622 1309 74391526 14.00 5.73077 3.51808 3.0	9497 E11.5_MANP_CHIP_G3BF_REP1_REP2_pooled_q0.01_peak_329a
c	hr1 74391314 74392622 1309 74391926 40.00 33.23634 11.20473 2	9.35288 E11.5_MANP_CHIP_G3BF_REP1_REP2_pooled_q0.01_peak_329b
c	hr1 74391314 74392622 1309 74392152 37.00 26.57711 8.91246 22	.89555 E11.5_MANP_CHIP_G3BF_REP1_REP2_pooled_q0.01_peak_329c
c	hr1 74397481 74397879 399 74397778 20.00 11.88794 5.73901 8.8	1922 E11.5_MANP_CHIP_G3BF_REP1_REP2_pooled_q0.01_peak_330
c	hr1 74398093 74398275 183 74398191 17.00 7.89603 4.22169 5.08	356 E11.5_MANP_CHIP_G3BF_REP1_REP2_pooled_q0.01_peak_331
c	hr1 74506014 74506915 902 74506317 38.00 30.86952 10.65815 27	.05543 E11.5_MANP_CHIP_G3BF_REP1_REP2_pooled_q0.01_peak_332
c	hr1 74587658 74587945 288 74587817 16.00 7.43893 4.13398 4.67	599 E11.5_MANP_CHIP_G3BF_REP1_REP2_pooled_q0.01_peak_333
c	hr1 74601180 74601384 205 74601325 12.00 5.22852 3.49160 2.65	192 E11.5_MANP_CHIP_G3BF_REP1_REP2_pooled_q0.01_peak_334
c	hr1 74661663 74662363 701 74661865 30.00 21.13997 8.11416 17.	65235 E11.5_MANP_CHIP_G3BF_REP1_REP2_pooled_q0.01_peak_335a
c	hr1 74661663 74662363 701 74662097 24.00 9.41637 4.01806 6.50	269 E11.5_MANP_CHIP_G3BF_REP1_REP2_pooled_q0.01_peak_335b
c	hr1 74773283 74773505 223 74773406 29.00 20.79730 8.19858 17.	31392 E11.5_MANP_CHIP_G3BF_REP1_REP2_pooled_q0.01_peak_336
c	hr1 74776663 74777194 532 74776789 16.00 8.41648 4.64586 5.55	904 E11.5_MANP_CHIP_G3BF_REP1_REP2_pooled_q0.01_peak_337a
c	hr1 74776663 74777194 532 74777053 26.00 17.68052 7.37872 14.	32329 E11.5_MANP_CHIP_G3BF_REP1_REP2_pooled_q0.01_peak_337b
c	hr1 74816888 74817226 339 74816961 12.00 5.33746 3.55272 2.71	634 E11.5_MANP_CHIP_G3BF_REP1_REP2_pooled_q0.01_peak_338a
c	hr1 74816888 74817226 339 74817135 16.00 8.41648 4.64586 5.55	904 E11.5_MANP_CHIP_G3BF_REP1_REP2_pooled_q0.01_peak_338b
c	hr1 74858099 74858248 150 74858226 18.00 8.66541 4.45623 5.79	866 E11.5_MANP_CHIP_G3BF_REP1_REP2_pooled_q0.01_peak_339
c	hr1 74891601 74891831 231 74891716 31.00 22.94677 8.74515 19.	38261 E11.5_MANP_CHIP_G3BF_REP1_REP2_pooled_q0.01_peak_340
c	hr1 75124643 75125287 645 75124980 18.00 10.10829 5.19243 7.1	4298 E11.5_MANP_CHIP_G3BF_REP1_REP2_pooled_q0.01_peak_341
c	hr1 75142500 75142937 438 75142644 17.00 9.25085 4.91915 6.33	859 E11.5_MANP_CHIP_G3BF_REP1_REP2_pooled_q0.01_peak_342a
c	hr1 75142500 75142937 438 75142905 16.00 8.41648 4.64586 5.55	904 E11.5_MANP_CHIP_G3BF_REP1_REP2_pooled_q0.01_peak_342b
c	hr1 75180149 75180316 168 75180185 14.00 6.50346 3.92621 3.80	374 E11.5_MANP_CHIP_G3BF_REP1_REP2_pooled_q0.01_peak_343
c	hr1 75191766 75191955 190 75191863 17.00 9.25085 4.91915 6.33	859 E11.5_MANP_CHIP_G3BF_REP1_REP2_pooled_q0.01_peak_344
c	hr1 75210789 75211215 427 75210950 39.00 32.04759 10.93144 28	.20100 E11.5_MANP_CHIP_G3BF_REP1_REP2_pooled_q0.01_peak_345
c	hr1 75277312 75277466 155 75277381 23.00 14.70505 6.55886 11.	48259 E11.5_MANP_CHIP_G3BF_REP1_REP2_pooled_q0.01_peak_346
c	hr1 75316994 75317373 380 75317122 24.00 15.44841 6.71461 12.	21472 E11.5_MANP_CHIP_G3BF_REP1_REP2_pooled_q0.01_peak_347
c	hr1 75317983 75318215 233 75318078 18.00 6.42162 3.41164 3.72	916 E11.5_MANP_CHIP_G3BF_REP1_REP2_pooled_q0.01_peak_348
c	hr1 75342930 75343150 221 75343061 18.00 10.10829 5.19243 7.1	4298 E11.5_MANP_CHIP_G3BF_REP1_REP2_pooled_q0.01_peak_349
c	hr1 75381849 75382342 494 75381997 24.00 15.68020 6.83215 12.	41189 E11.5_MANP_CHIP_G3BF_REP1_REP2_pooled_q0.01_peak_350a
c	hr1 75381849 75382342 494 75382230 21.00 12.80816 6.01229 9.6	8985 E11.5_MANP_CHIP_G3BF_REP1_REP2_pooled_q0.01_peak_350b
c	hr1 75382416 75382668 253 75382498 14.00 6.82220 4.09929 4.07	683 E11.5_MANP_CHIP_G3BF_REP1_REP2_pooled_q0.01_peak_351
c	hr1 75458484 75458718 235 75458516 12.00 5.33746 3.55272 2.71	634 E11.5_MANP_CHIP_G3BF_REP1_REP2_pooled_q0.01_peak_352
c	hr1 75479047 75479658 612 75479260 18.00 6.42162 3.41164 3.72	916 E11.5_MANP_CHIP_G3BF_REP1_REP2_pooled_q0.01_peak_353a
c	hr1 75479047 75479658 612 75479505 21.00 8.42360 3.95032 5.56	468 E11.5_MANP_CHIP_G3BF_REP1_REP2_pooled_q0.01_peak_353b
c	hr1 75495046 75495365 320 75495182 21.00 8.42360 3.95032 5.56	468 E11.5_MANP_CHIP_G3BF_REP1_REP2_pooled_q0.01_peak_354
c	hr1 75505486 75506521 1036 75505916 49.00 43.88777 13.42922 3	9.76694 E11.5_MANP_CHIP_G3BF_REP1_REP2_pooled_q0.01_peak_355a
c	hr1 75505486 75506521 1036 75506239 42.00 32.07565 10.08516 2	8.22521 E11.5_MANP_CHIP_G3BF_REP1_REP2_pooled_q0.01_peak_355b
c	hr1 75521075 75521674 600 75521420 96.00 111.92567 26.50874 1	06.97902 E11.5_MANP_CHIP_G3BF_REP1_REP2_pooled_q0.01_peak_356
c	hr1 75546288 75546749 462 75546437 21.00 12.80816 6.01229 9.6	8985 E11.5_MANP_CHIP_G3BF_REP1_REP2_pooled_q0.01_peak_357a
c	hr1 75546288 75546749 462 75546597 21.00 12.80816 6.01229 9.6	8985 E11.5_MANP_CHIP_G3BF_REP1_REP2_pooled_q0.01_peak_357b
c	hr1 75559568 75559947 380 75559735 33.00 22.37907 7.97431 18.	84602 E11.5_MANP_CHIP_G3BF_REP1_REP2_pooled_q0.01_peak_358
c	hr1 75667658 75668316 659 75667793 64.00 64.44482 17.76359 59	.97326 E11.5_MANP_CHIP_G3BF_REP1_REP2_pooled_q0.01_peak_359
c	hr1 75833498 75833769 272 75833604 25.00 14.61092 6.09800 11.	41868 E11.5_MANP_CHIP_G3BF_REP1_REP2_pooled_q0.01_peak_360
c	hr1 75844283 75844453 171 75844359 17.00 9.25085 4.91915 6.33	859 E11.5_MANP_CHIP_G3BF_REP1_REP2_pooled_q0.01_peak_361
c	hr1 76247086 76247591 506 76247295 61.00 60.29976 16.94373 55	.88474 E11.5_MANP_CHIP_G3BF_REP1_REP2_pooled_q0.01_peak_362
c	hr1 76467784 76467951 168 76467860 14.00 6.82220 4.09929 4.07	683 E11.5_MANP_CHIP_G3BF_REP1_REP2_pooled_q0.01_peak_363
c	hr1 76907287 76907455 169 76907360 23.00 12.82070 5.62892 9.6	9682 E11.5_MANP_CHIP_G3BF_REP1_REP2_pooled_q0.01_peak_364
c	hr1 77227141 77227311 171 77227238 21.00 9.62773 4.47479 6.70	316 E11.5_MANP_CHIP_G3BF_REP1_REP2_pooled_q0.01_peak_365
c	hr1 77241234 77241501 268 77241350 15.00 7.60646 4.37258 4.80	472 E11.5_MANP_CHIP_G3BF_REP1_REP2_pooled_q0.01_peak_366
c	hr1 77405081 77405253 173 77405170 16.00 8.41648 4.64586 5.55	904 E11.5_MANP_CHIP_G3BF_REP1_REP2_pooled_q0.01_peak_367
c	hr1 77514098 77515255 1158 77514180 15.00 7.60646 4.37258 4.8	0472 E11.5_MANP_CHIP_G3BF_REP1_REP2_pooled_q0.01_peak_368a
c	hr1 77514098 77515255 1158 77514334 19.00 7.06863 3.59120 4.3	1928 E11.5_MANP_CHIP_G3BF_REP1_REP2_pooled_q0.01_peak_368b
c	hr1 77514098 77515255 1158 77514704 24.00 15.68020 6.83215 12	.41189 E11.5_MANP_CHIP_G3BF_REP1_REP2_pooled_q0.01_peak_368c
c	hr1 77514098 77515255 1158 77515009 20.00 7.73626 3.77076 4.9	3182 E11.5_MANP_CHIP_G3BF_REP1_REP2_pooled_q0.01_peak_368d
c	hr1 77516141 77516519 379 77516389 31.00 22.94677 8.74515 19.	38261 E11.5_MANP_CHIP_G3BF_REP1_REP2_pooled_q0.01_peak_369
c	hr1 78089954 78090191 238 78090099 16.00 8.41648 4.64586 5.55	904 E11.5_MANP_CHIP_G3BF_REP1_REP2_pooled_q0.01_peak_370
c	hr1 78309568 78309871 304 78309725 25.00 16.67223 7.10544 13.	35840 E11.5_MANP_CHIP_G3BF_REP1_REP2_pooled_q0.01_peak_371
c	hr1 78488628 78488779 152 78488734 18.00 10.10829 5.19243 7.1	4298 E11.5_MANP_CHIP_G3BF_REP1_REP2_pooled_q0.01_peak_372
c	hr1 78657793 78658953 1161 78657989 38.00 30.86952 10.65815 2	7.05543 E11.5_MANP_CHIP_G3BF_REP1_REP2_pooled_q0.01_peak_373a
c	hr1 78657793 78658953 1161 78658490 18.00 10.10829 5.19243 7.	14298 E11.5_MANP_CHIP_G3BF_REP1_REP2_pooled_q0.01_peak_373b
c	hr1 78657793 78658953 1161 78658806 35.00 19.74374 6.46416 16	.30083 E11.5_MANP_CHIP_G3BF_REP1_REP2_pooled_q0.01_peak_373c
c	hr1 78876264 78876472 209 78876375 24.00 15.68020 6.83215 12.	41189 E11.5_MANP_CHIP_G3BF_REP1_REP2_pooled_q0.01_peak_374
c	hr1 78939868 78940052 185 78939956 20.00 10.26867 4.92531 7.2	9611 E11.5_MANP_CHIP_G3BF_REP1_REP2_pooled_q0.01_peak_375
c	hr1 79439936 79440120 185 79440031 20.00 11.88794 5.73901 8.8	1922 E11.5_MANP_CHIP_G3BF_REP1_REP2_pooled_q0.01_peak_376
c	hr1 79761375 79761708 334 79761626 21.00 12.80816 6.01229 9.6	8985 E11.5_MANP_CHIP_G3BF_REP1_REP2_pooled_q0.01_peak_377
c	hr1 79776003 79776462 460 79776114 24.00 15.68020 6.83215 12.	41189 E11.5_MANP_CHIP_G3BF_REP1_REP2_pooled_q0.01_peak_378a
c	hr1 79776003 79776462 460 79776372 17.00 9.25085 4.91915 6.33	859 E11.5_MANP_CHIP_G3BF_REP1_REP2_pooled_q0.01_peak_378b
c	hr1 79822203 79822351 149 79822275 13.00 6.06527 3.82600 3.38	153 E11.5_MANP_CHIP_G3BF_REP1_REP2_pooled_q0.01_peak_379
c	hr1 79858254 79858495 242 79858362 13.00 6.06527 3.82600 3.38	153 E11.5_MANP_CHIP_G3BF_REP1_REP2_pooled_q0.01_peak_380
c	hr1 79858577 79858909 333 79858661 13.00 5.06128 3.28354 2.49	038 E11.5_MANP_CHIP_G3BF_REP1_REP2_pooled_q0.01_peak_381a
c	hr1 79858577 79858909 333 79858855 16.00 7.14960 3.98715 4.39	330 E11.5_MANP_CHIP_G3BF_REP1_REP2_pooled_q0.01_peak_381b
c	hr1 80240063 80240386 324 80240236 19.00 10.98767 5.46572 7.9	7026 E11.5_MANP_CHIP_G3BF_REP1_REP2_pooled_q0.01_peak_382
c	hr1 80339671 80340433 763 80339843 18.00 10.10829 5.19243 7.1	4298 E11.5_MANP_CHIP_G3BF_REP1_REP2_pooled_q0.01_peak_383a
c	hr1 80339671 80340433 763 80340243 43.00 36.86421 12.02458 32	.89013 E11.5_MANP_CHIP_G3BF_REP1_REP2_pooled_q0.01_peak_383b
c	hr1 80340531 80340766 236 80340648 26.00 17.68052 7.37872 14.	32329 E11.5_MANP_CHIP_G3BF_REP1_REP2_pooled_q0.01_peak_384
c	hr1 81593492 81593819 328 81593694 21.00 11.49203 5.34986 8.4	5933 E11.5_MANP_CHIP_G3BF_REP1_REP2_pooled_q0.01_peak_385
c	hr1 81608892 81609164 273 81609029 30.00 21.86518 8.47186 18.	34202 E11.5_MANP_CHIP_G3BF_REP1_REP2_pooled_q0.01_peak_386
c	hr1 82112462 82112816 355 82112641 72.00 43.74738 8.26459 39.	63046 E11.5_MANP_CHIP_G3BF_REP1_REP2_pooled_q0.01_peak_387
c	hr1 82261209 82261524 316 82261429 13.00 6.06527 3.82600 3.38	153 E11.5_MANP_CHIP_G3BF_REP1_REP2_pooled_q0.01_peak_388
c	hr1 82262363 82262647 285 82262534 21.00 12.80816 6.01229 9.6	8985 E11.5_MANP_CHIP_G3BF_REP1_REP2_pooled_q0.01_peak_389
c	hr1 82283397 82283723 327 82283510 27.00 18.70449 7.65201 15.	30417 E11.5_MANP_CHIP_G3BF_REP1_REP2_pooled_q0.01_peak_390
c	hr1 82290987 82292075 1089 82291132 25.00 16.67223 7.10544 13	.35840 E11.5_MANP_CHIP_G3BF_REP1_REP2_pooled_q0.01_peak_391a
c	hr1 82290987 82292075 1089 82291443 19.00 10.98767 5.46572 7.	97026 E11.5_MANP_CHIP_G3BF_REP1_REP2_pooled_q0.01_peak_391b
c	hr1 82290987 82292075 1089 82291787 48.00 43.10269 13.39101 3	8.99024 E11.5_MANP_CHIP_G3BF_REP1_REP2_pooled_q0.01_peak_391c
c	hr1 82316671 82316978 308 82316776 15.00 7.60646 4.37258 4.80	472 E11.5_MANP_CHIP_G3BF_REP1_REP2_pooled_q0.01_peak_392
c	hr1 82476437 82476597 161 82476523 13.00 5.60446 3.57349 2.97	600 E11.5_MANP_CHIP_G3BF_REP1_REP2_pooled_q0.01_peak_393
c	hr1 82724809 82725358 550 82725031 44.00 38.09327 12.29787 34	.09045 E11.5_MANP_CHIP_G3BF_REP1_REP2_pooled_q0.01_peak_394a
c	hr1 82724809 82725358 550 82725199 35.00 27.40221 9.83829 23.	69099 E11.5_MANP_CHIP_G3BF_REP1_REP2_pooled_q0.01_peak_394b
c	hr1 82839313 82840217 905 82839816 30.00 19.36089 7.27069 15.	94879 E11.5_MANP_CHIP_G3BF_REP1_REP2_pooled_q0.01_peak_395
c	hr1 83038337 83038509 173 83038445 13.00 6.06527 3.82600 3.38	153 E11.5_MANP_CHIP_G3BF_REP1_REP2_pooled_q0.01_peak_396
c	hr1 84696238 84696492 255 84696351 23.00 12.82070 5.62892 9.6	9682 E11.5_MANP_CHIP_G3BF_REP1_REP2_pooled_q0.01_peak_397
c	hr1 84838487 84840319 1833 84838810 28.00 19.74358 7.92529 16	.30083 E11.5_MANP_CHIP_G3BF_REP1_REP2_pooled_q0.01_peak_398a
c	hr1 84838487 84840319 1833 84839068 24.00 15.68020 6.83215 12	.41189 E11.5_MANP_CHIP_G3BF_REP1_REP2_pooled_q0.01_peak_398b
c	hr1 84838487 84840319 1833 84839323 25.00 16.67223 7.10544 13	.35840 E11.5_MANP_CHIP_G3BF_REP1_REP2_pooled_q0.01_peak_398c
c	hr1 84838487 84840319 1833 84839447 22.00 11.95153 5.39439 8.	87686 E11.5_MANP_CHIP_G3BF_REP1_REP2_pooled_q0.01_peak_398d
c	hr1 84838487 84840319 1833 84839727 18.00 10.10829 5.19243 7.	14298 E11.5_MANP_CHIP_G3BF_REP1_REP2_pooled_q0.01_peak_398e
c	hr1 84838487 84840319 1833 84839984 21.00 12.80816 6.01229 9.	68985 E11.5_MANP_CHIP_G3BF_REP1_REP2_pooled_q0.01_peak_398f
c	hr1 84838487 84840319 1833 84840169 14.00 4.80458 3.05099 2.2	4391 E11.5_MANP_CHIP_G3BF_REP1_REP2_pooled_q0.01_peak_398g
c	hr1 85731504 85731676 173 85731582 15.00 7.60646 4.37258 4.80	472 E11.5_MANP_CHIP_G3BF_REP1_REP2_pooled_q0.01_peak_399
c	hr1 85793423 85793847 425 85793559 24.00 14.78019 6.38123 11.	55643 E11.5_MANP_CHIP_G3BF_REP1_REP2_pooled_q0.01_peak_400a
c	hr1 85793423 85793847 425 85793734 24.00 14.46461 6.22665 11.	28342 E11.5_MANP_CHIP_G3BF_REP1_REP2_pooled_q0.01_peak_400b
c	hr1 85793939 85794158 220 85794009 18.00 10.10829 5.19243 7.1	4298 E11.5_MANP_CHIP_G3BF_REP1_REP2_pooled_q0.01_peak_401
c	hr1 85894504 85895338 835 85894669 26.00 17.68052 7.37872 14.	32329 E11.5_MANP_CHIP_G3BF_REP1_REP2_pooled_q0.01_peak_402a
c	hr1 85894504 85895338 835 85894852 20.00 11.88794 5.73901 8.8	1922 E11.5_MANP_CHIP_G3BF_REP1_REP2_pooled_q0.01_peak_402b
c	hr1 85894504 85895338 835 85895119 21.00 12.80816 6.01229 9.6	8985 E11.5_MANP_CHIP_G3BF_REP1_REP2_pooled_q0.01_peak_402c
c	hr1 86064578 86065211 634 86064722 28.00 18.68307 7.40223 15.	30417 E11.5_MANP_CHIP_G3BF_REP1_REP2_pooled_q0.01_peak_403a
c	hr1 86064578 86065211 634 86065004 14.00 6.82220 4.09929 4.07	683 E11.5_MANP_CHIP_G3BF_REP1_REP2_pooled_q0.01_peak_403b
c	hr1 86154362 86154772 411 86154472 15.00 7.60646 4.37258 4.80	472 E11.5_MANP_CHIP_G3BF_REP1_REP2_pooled_q0.01_peak_404
c	hr1 86303264 86303412 149 86303386 14.00 6.82220 4.09929 4.07	683 E11.5_MANP_CHIP_G3BF_REP1_REP2_pooled_q0.01_peak_405
c	hr1 86358584 86359434 851 86358769 22.00 11.95153 5.39439 8.8	7686 E11.5_MANP_CHIP_G3BF_REP1_REP2_pooled_q0.01_peak_406a
c	hr1 86358584 86359434 851 86359013 21.00 8.42360 3.95032 5.56	468 E11.5_MANP_CHIP_G3BF_REP1_REP2_pooled_q0.01_peak_406b
c	hr1 86358584 86359434 851 86359241 39.00 29.50605 9.72702 25.	74769 E11.5_MANP_CHIP_G3BF_REP1_REP2_pooled_q0.01_peak_406c
c	hr1 86359643 86360076 434 86359818 26.00 13.66477 5.49179 10.	52614 E11.5_MANP_CHIP_G3BF_REP1_REP2_pooled_q0.01_peak_407
c	hr1 86434148 86434362 215 86434293 16.00 8.41648 4.64586 5.55	904 E11.5_MANP_CHIP_G3BF_REP1_REP2_pooled_q0.01_peak_408
c	hr1 86434628 86434793 166 86434714 22.00 12.09632 5.46381 9.0	1696 E11.5_MANP_CHIP_G3BF_REP1_REP2_pooled_q0.01_peak_409
c	hr1 86440731 86441008 278 86440731 12.00 5.33746 3.55272 2.71	634 E11.5_MANP_CHIP_G3BF_REP1_REP2_pooled_q0.01_peak_410
c	hr1 86441645 86442912 1268 86442107 31.00 22.94677 8.74515 19	.38261 E11.5_MANP_CHIP_G3BF_REP1_REP2_pooled_q0.01_peak_411a
c	hr1 86441645 86442912 1268 86442284 32.00 24.04164 9.01844 20	.43975 E11.5_MANP_CHIP_G3BF_REP1_REP2_pooled_q0.01_peak_411b
c	hr1 86441645 86442912 1268 86442764 24.00 15.68020 6.83215 12	.41189 E11.5_MANP_CHIP_G3BF_REP1_REP2_pooled_q0.01_peak_411c
c	hr1 86464878 86465161 284 86464916 15.00 6.42739 3.75262 3.72	916 E11.5_MANP_CHIP_G3BF_REP1_REP2_pooled_q0.01_peak_412
c	hr1 86487062 86487629 568 86487253 22.00 11.95153 5.39439 8.8	7686 E11.5_MANP_CHIP_G3BF_REP1_REP2_pooled_q0.01_peak_413a
c	hr1 86487062 86487629 568 86487516 19.00 9.45664 4.69077 6.53	596 E11.5_MANP_CHIP_G3BF_REP1_REP2_pooled_q0.01_peak_413b
c	hr1 86487726 86488111 386 86487964 16.00 8.41648 4.64586 5.55	904 E11.5_MANP_CHIP_G3BF_REP1_REP2_pooled_q0.01_peak_414
c	hr1 86503384 86504734 1351 86503845 24.00 15.68020 6.83215 12	.41189 E11.5_MANP_CHIP_G3BF_REP1_REP2_pooled_q0.01_peak_415a
c	hr1 86503384 86504734 1351 86504039 33.00 17.95958 6.10504 14	.59911 E11.5_MANP_CHIP_G3BF_REP1_REP2_pooled_q0.01_peak_415b
c	hr1 86503384 86504734 1351 86504391 27.00 16.46606 6.56708 13	.18194 E11.5_MANP_CHIP_G3BF_REP1_REP2_pooled_q0.01_peak_415c
c	hr1 86509525 86509710 186 86509633 12.00 5.33746 3.55272 2.71	634 E11.5_MANP_CHIP_G3BF_REP1_REP2_pooled_q0.01_peak_416
c	hr1 86512005 86512157 153 86512078 14.00 6.82220 4.09929 4.07	683 E11.5_MANP_CHIP_G3BF_REP1_REP2_pooled_q0.01_peak_417
c	hr1 86524595 86526439 1845 86524913 16.00 8.26679 4.56593 5.4	4596 E11.5_MANP_CHIP_G3BF_REP1_REP2_pooled_q0.01_peak_418a
c	hr1 86524595 86526439 1845 86525197 19.00 8.14055 4.06799 5.3	2214 E11.5_MANP_CHIP_G3BF_REP1_REP2_pooled_q0.01_peak_418b
c	hr1 86524595 86526439 1845 86525619 17.00 8.63094 4.59448 5.7	7035 E11.5_MANP_CHIP_G3BF_REP1_REP2_pooled_q0.01_peak_418c
c	hr1 86524595 86526439 1845 86526094 32.00 24.04164 9.01844 20	.43975 E11.5_MANP_CHIP_G3BF_REP1_REP2_pooled_q0.01_peak_418d
c	hr1 86526511 86529144 2634 86526872 45.00 35.49615 10.78877 3	1.57141 E11.5_MANP_CHIP_G3BF_REP1_REP2_pooled_q0.01_peak_419a
c	hr1 86526511 86529144 2634 86527091 49.00 33.43489 8.97800 29	.54940 E11.5_MANP_CHIP_G3BF_REP1_REP2_pooled_q0.01_peak_419b
c	hr1 86526511 86529144 2634 86527277 50.00 45.16072 13.69780 4	1.01437 E11.5_MANP_CHIP_G3BF_REP1_REP2_pooled_q0.01_peak_419c
c	hr1 86526511 86529144 2634 86527497 57.00 54.87074 15.85059 5	0.54016 E11.5_MANP_CHIP_G3BF_REP1_REP2_pooled_q0.01_peak_419d
c	hr1 86526511 86529144 2634 86527745 47.00 41.83675 13.11773 3	7.75009 E11.5_MANP_CHIP_G3BF_REP1_REP2_pooled_q0.01_peak_419e
c	hr1 86526511 86529144 2634 86528149 31.00 13.27953 4.65479 10	.14690 E11.5_MANP_CHIP_G3BF_REP1_REP2_pooled_q0.01_peak_419f
c	hr1 86526511 86529144 2634 86528498 41.00 32.29551 10.46078 2	8.44197 E11.5_MANP_CHIP_G3BF_REP1_REP2_pooled_q0.01_peak_419g
c	hr1 86526511 86529144 2634 86529032 24.00 13.70739 5.86346 10	.56365 E11.5_MANP_CHIP_G3BF_REP1_REP2_pooled_q0.01_peak_419h
c	hr1 86531957 86532303 347 86532066 18.00 10.10829 5.19243 7.1	4298 E11.5_MANP_CHIP_G3BF_REP1_REP2_pooled_q0.01_peak_420
c	hr1 86582493 86582672 180 86582566 19.00 9.45664 4.69077 6.53	596 E11.5_MANP_CHIP_G3BF_REP1_REP2_pooled_q0.01_peak_421
c	hr1 86586980 86587306 327 86587123 32.00 21.97726 8.02479 18.	45106 E11.5_MANP_CHIP_G3BF_REP1_REP2_pooled_q0.01_peak_422
c	hr1 86703651 86704230 580 86703741 16.00 8.41648 4.64586 5.55	904 E11.5_MANP_CHIP_G3BF_REP1_REP2_pooled_q0.01_peak_423a
c	hr1 86703651 86704230 580 86704004 25.00 16.67223 7.10544 13.	35840 E11.5_MANP_CHIP_G3BF_REP1_REP2_pooled_q0.01_peak_423b
c	hr1 87213670 87214510 841 87213790 27.00 18.70449 7.65201 15.	30417 E11.5_MANP_CHIP_G3BF_REP1_REP2_pooled_q0.01_peak_424a
c	hr1 87213670 87214510 841 87214068 17.00 9.25085 4.91915 6.33	859 E11.5_MANP_CHIP_G3BF_REP1_REP2_pooled_q0.01_peak_424b
c	hr1 87213670 87214510 841 87214209 21.00 12.80816 6.01229 9.6	8985 E11.5_MANP_CHIP_G3BF_REP1_REP2_pooled_q0.01_peak_424c
c	hr1 87327026 87327371 346 87327169 22.00 13.74746 6.28558 10.	57194 E11.5_MANP_CHIP_G3BF_REP1_REP2_pooled_q0.01_peak_425
c	hr1 87327498 87327698 201 87327561 12.00 5.33746 3.55272 2.71	634 E11.5_MANP_CHIP_G3BF_REP1_REP2_pooled_q0.01_peak_426
c	hr1 87755931 87756376 446 87756102 18.00 10.10829 5.19243 7.1	4298 E11.5_MANP_CHIP_G3BF_REP1_REP2_pooled_q0.01_peak_427a
c	hr1 87755931 87756376 446 87756271 18.00 10.10829 5.19243 7.1	4298 E11.5_MANP_CHIP_G3BF_REP1_REP2_pooled_q0.01_peak_427b
c	hr1 87795811 87796089 279 87795938 44.00 38.09327 12.29787 34	.09045 E11.5_MANP_CHIP_G3BF_REP1_REP2_pooled_q0.01_peak_428
c	hr1 87853333 87853904 572 87853445 24.00 15.68020 6.83215 12.	41189 E11.5_MANP_CHIP_G3BF_REP1_REP2_pooled_q0.01_peak_429a
c	hr1 87853333 87853904 572 87853626 36.00 28.54655 10.11158 24	.80025 E11.5_MANP_CHIP_G3BF_REP1_REP2_pooled_q0.01_peak_429b
c	hr1 88008164 88008616 453 88008398 33.00 25.14942 9.29172 21.	51036 E11.5_MANP_CHIP_G3BF_REP1_REP2_pooled_q0.01_peak_430
c	hr1 88205469 88205687 219 88205570 17.00 9.25085 4.91915 6.33	859 E11.5_MANP_CHIP_G3BF_REP1_REP2_pooled_q0.01_peak_431
c	hr1 88275814 88276048 235 88275885 18.00 4.87802 2.76378 2.31	665 E11.5_MANP_CHIP_G3BF_REP1_REP2_pooled_q0.01_peak_432
c	hr1 88276547 88278092 1546 88276783 19.00 5.90109 3.10248 3.2	6145 E11.5_MANP_CHIP_G3BF_REP1_REP2_pooled_q0.01_peak_433a
c	hr1 88276547 88278092 1546 88277305 59.00 31.62717 6.79282 27	.80422 E11.5_MANP_CHIP_G3BF_REP1_REP2_pooled_q0.01_peak_433b
c	hr1 88276547 88278092 1546 88277484 75.00 46.69271 8.60423 42	.51955 E11.5_MANP_CHIP_G3BF_REP1_REP2_pooled_q0.01_peak_433c
c	hr1 88526303 88526613 311 88526461 45.00 39.33184 12.57115 35	.30061 E11.5_MANP_CHIP_G3BF_REP1_REP2_pooled_q0.01_peak_434
c	hr1 88700850 88701291 442 88701188 17.00 9.09092 4.83452 6.21	578 E11.5_MANP_CHIP_G3BF_REP1_REP2_pooled_q0.01_peak_435
c	hr1 88701526 88702486 961 88701583 17.00 7.89603 4.22169 5.08	356 E11.5_MANP_CHIP_G3BF_REP1_REP2_pooled_q0.01_peak_436a
c	hr1 88701526 88702486 961 88701854 21.00 9.62773 4.47479 6.70	316 E11.5_MANP_CHIP_G3BF_REP1_REP2_pooled_q0.01_peak_436b
c	hr1 88701526 88702486 961 88702014 19.00 8.74559 4.34920 5.87	803 E11.5_MANP_CHIP_G3BF_REP1_REP2_pooled_q0.01_peak_436c
c	hr1 88701526 88702486 961 88702393 12.00 4.62894 3.16128 2.08	535 E11.5_MANP_CHIP_G3BF_REP1_REP2_pooled_q0.01_peak_436d
c	hr1 88865546 88865851 306 88865717 42.00 32.07565 10.08516 28	.22521 E11.5_MANP_CHIP_G3BF_REP1_REP2_pooled_q0.01_peak_437
c	hr1 89070301 89071155 855 89070504 20.00 5.97848 3.05470 3.33	667 E11.5_MANP_CHIP_G3BF_REP1_REP2_pooled_q0.01_peak_438a
c	hr1 89070301 89071155 855 89070744 30.00 19.36089 7.27069 15.	94879 E11.5_MANP_CHIP_G3BF_REP1_REP2_pooled_q0.01_peak_438b
c	hr1 89070301 89071155 855 89070931 24.00 14.78019 6.38123 11.	55643 E11.5_MANP_CHIP_G3BF_REP1_REP2_pooled_q0.01_peak_438c
c	hr1 89454389 89454720 332 89454578 26.00 17.68052 7.37872 14.	32329 E11.5_MANP_CHIP_G3BF_REP1_REP2_pooled_q0.01_peak_439
c	hr1 89577265 89577426 162 89577349 16.00 8.41648 4.64586 5.55	904 E11.5_MANP_CHIP_G3BF_REP1_REP2_pooled_q0.01_peak_440
c	hr1 89580001 89580208 208 89580100 17.00 9.25085 4.91915 6.33	859 E11.5_MANP_CHIP_G3BF_REP1_REP2_pooled_q0.01_peak_441
c	hr1 89673890 89674073 184 89673980 21.00 12.80816 6.01229 9.6	8985 E11.5_MANP_CHIP_G3BF_REP1_REP2_pooled_q0.01_peak_442
c	hr1 89764007 89764262 256 89764154 21.00 12.80816 6.01229 9.6	8985 E11.5_MANP_CHIP_G3BF_REP1_REP2_pooled_q0.01_peak_443
c	hr1 89781972 89782120 149 89782054 17.00 9.25085 4.91915 6.33	859 E11.5_MANP_CHIP_G3BF_REP1_REP2_pooled_q0.01_peak_444
c	hr1 89816987 89817249 263 89817119 39.00 32.04759 10.93144 28	.20100 E11.5_MANP_CHIP_G3BF_REP1_REP2_pooled_q0.01_peak_445
c	hr1 89922927 89923170 244 89923057 21.00 12.80816 6.01229 9.6	8985 E11.5_MANP_CHIP_G3BF_REP1_REP2_pooled_q0.01_peak_446
c	hr1 89930740 89930901 162 89930804 12.00 4.91620 3.31824 2.35	358 E11.5_MANP_CHIP_G3BF_REP1_REP2_pooled_q0.01_peak_447
c	hr1 89931008 89931197 190 89931122 13.00 6.06527 3.82600 3.38	153 E11.5_MANP_CHIP_G3BF_REP1_REP2_pooled_q0.01_peak_448
c	hr1 89968617 89968765 149 89968711 14.00 6.82220 4.09929 4.07	683 E11.5_MANP_CHIP_G3BF_REP1_REP2_pooled_q0.01_peak_449
c	hr1 90028405 90028716 312 90028557 91.00 104.16036 25.14231 9	9.27311 E11.5_MANP_CHIP_G3BF_REP1_REP2_pooled_q0.01_peak_450
c	hr1 90100550 90100713 164 90100624 24.00 11.99886 5.08499 8.9	2108 E11.5_MANP_CHIP_G3BF_REP1_REP2_pooled_q0.01_peak_451
c	hr1 90335366 90336010 645 90335514 14.00 6.82220 4.09929 4.07	683 E11.5_MANP_CHIP_G3BF_REP1_REP2_pooled_q0.01_peak_452a
c	hr1 90335366 90336010 645 90335828 49.00 44.37739 13.66430 40	.23867 E11.5_MANP_CHIP_G3BF_REP1_REP2_pooled_q0.01_peak_452b
c	hr1 90603481 90603910 430 90603604 35.00 27.40221 9.83829 23.	69099 E11.5_MANP_CHIP_G3BF_REP1_REP2_pooled_q0.01_peak_453
c	hr1 90651094 90651358 265 90651183 17.00 6.73634 3.66119 4.03	008 E11.5_MANP_CHIP_G3BF_REP1_REP2_pooled_q0.01_peak_454
c	hr1 90794358 90794680 323 90794539 40.00 20.48233 5.96394 17.	02880 E11.5_MANP_CHIP_G3BF_REP1_REP2_pooled_q0.01_peak_455
c	hr1 90836400 90836724 325 90836541 16.00 7.14960 3.98715 4.39	330 E11.5_MANP_CHIP_G3BF_REP1_REP2_pooled_q0.01_peak_456
c	hr1 90973354 90973502 149 90973445 20.00 11.88794 5.73901 8.8	1922 E11.5_MANP_CHIP_G3BF_REP1_REP2_pooled_q0.01_peak_457
c	hr1 90998800 90999129 330 90998895 18.00 10.10829 5.19243 7.1	4298 E11.5_MANP_CHIP_G3BF_REP1_REP2_pooled_q0.01_peak_458
c	hr1 91249704 91251031 1328 91250210 20.00 11.88794 5.73901 8.	81922 E11.5_MANP_CHIP_G3BF_REP1_REP2_pooled_q0.01_peak_459a
c	hr1 91249704 91251031 1328 91250430 22.00 13.74746 6.28558 10	.57194 E11.5_MANP_CHIP_G3BF_REP1_REP2_pooled_q0.01_peak_459b
c	hr1 91249704 91251031 1328 91250630 24.00 15.68020 6.83215 12	.41189 E11.5_MANP_CHIP_G3BF_REP1_REP2_pooled_q0.01_peak_459c
c	hr1 91369048 91369219 172 91369126 16.00 8.41648 4.64586 5.55	904 E11.5_MANP_CHIP_G3BF_REP1_REP2_pooled_q0.01_peak_460
c	hr1 91398130 91398751 622 91398375 21.00 12.80816 6.01229 9.6	8985 E11.5_MANP_CHIP_G3BF_REP1_REP2_pooled_q0.01_peak_461a
c	hr1 91398130 91398751 622 91398618 22.00 13.74746 6.28558 10.	57194 E11.5_MANP_CHIP_G3BF_REP1_REP2_pooled_q0.01_peak_461b
c	hr1 91412950 91413216 267 91413121 20.00 10.26867 4.92531 7.2	9611 E11.5_MANP_CHIP_G3BF_REP1_REP2_pooled_q0.01_peak_462
c	hr1 91414173 91414546 374 91414356 21.00 9.62773 4.47479 6.70	316 E11.5_MANP_CHIP_G3BF_REP1_REP2_pooled_q0.01_peak_463
c	hr1 91459394 91459807 414 91459491 20.00 7.73626 3.77076 4.93	182 E11.5_MANP_CHIP_G3BF_REP1_REP2_pooled_q0.01_peak_464
c	hr1 91494832 91494991 160 91494904 17.00 7.89603 4.22169 5.08	356 E11.5_MANP_CHIP_G3BF_REP1_REP2_pooled_q0.01_peak_465
c	hr1 91633021 91633336 316 91633177 23.00 14.70505 6.55886 11.	48259 E11.5_MANP_CHIP_G3BF_REP1_REP2_pooled_q0.01_peak_466
c	hr1 91760216 91760528 313 91760312 15.00 5.42355 3.25439 2.79	831 E11.5_MANP_CHIP_G3BF_REP1_REP2_pooled_q0.01_peak_467
c	hr1 91800865 91801308 444 91800985 23.00 12.82070 5.62892 9.6	9682 E11.5_MANP_CHIP_G3BF_REP1_REP2_pooled_q0.01_peak_468a
c	hr1 91800865 91801308 444 91801205 17.00 9.25085 4.91915 6.33	859 E11.5_MANP_CHIP_G3BF_REP1_REP2_pooled_q0.01_peak_468b
c	hr1 91801443 91801929 487 91801799 26.00 14.80570 5.99828 11.	58154 E11.5_MANP_CHIP_G3BF_REP1_REP2_pooled_q0.01_peak_469
c	hr1 91802052 91802447 396 91802141 16.00 6.06792 3.45779 3.38	153 E11.5_MANP_CHIP_G3BF_REP1_REP2_pooled_q0.01_peak_470a
c	hr1 91802052 91802447 396 91802336 13.00 5.77171 3.66446 3.13	443 E11.5_MANP_CHIP_G3BF_REP1_REP2_pooled_q0.01_peak_470b
c	hr1 91802605 91802830 226 91802707 13.00 6.06527 3.82600 3.38	153 E11.5_MANP_CHIP_G3BF_REP1_REP2_pooled_q0.01_peak_471
c	hr1 92179296 92179771 476 92179567 16.00 8.41648 4.64586 5.55	904 E11.5_MANP_CHIP_G3BF_REP1_REP2_pooled_q0.01_peak_472a
c	hr1 92179296 92179771 476 92179722 14.00 6.82220 4.09929 4.07	683 E11.5_MANP_CHIP_G3BF_REP1_REP2_pooled_q0.01_peak_472b
c	hr1 92180682 92180850 169 92180752 25.00 13.91630 5.77612 10.	73863 E11.5_MANP_CHIP_G3BF_REP1_REP2_pooled_q0.01_peak_473
c	hr1 92180976 92181158 183 92181067 21.00 11.75523 5.47945 8.7	1890 E11.5_MANP_CHIP_G3BF_REP1_REP2_pooled_q0.01_peak_474
c	hr1 92371753 92371999 247 92371880 32.00 24.04164 9.01844 20.	43975 E11.5_MANP_CHIP_G3BF_REP1_REP2_pooled_q0.01_peak_475
c	hr1 92473384 92473813 430 92473655 25.00 12.82373 5.28839 9.6	9685 E11.5_MANP_CHIP_G3BF_REP1_REP2_pooled_q0.01_peak_476
c	hr1 92611088 92611439 352 92611252 88.00 74.57279 14.30430 69	.97590 E11.5_MANP_CHIP_G3BF_REP1_REP2_pooled_q0.01_peak_477
c	hr1 92641761 92642168 408 92641833 18.00 9.93812 5.10310 7.00	789 E11.5_MANP_CHIP_G3BF_REP1_REP2_pooled_q0.01_peak_478
c	hr1 92687119 92687272 154 92687185 21.00 11.10059 5.15985 8.0	7674 E11.5_MANP_CHIP_G3BF_REP1_REP2_pooled_q0.01_peak_479
c	hr1 92791469 92791720 252 92791628 13.00 6.06527 3.82600 3.38	153 E11.5_MANP_CHIP_G3BF_REP1_REP2_pooled_q0.01_peak_480
c	hr1 92831342 92831588 247 92831457 28.00 19.74358 7.92529 16.	30083 E11.5_MANP_CHIP_G3BF_REP1_REP2_pooled_q0.01_peak_481
c	hr1 92831739 92832881 1143 92832132 22.00 10.40017 4.67819 7.	42281 E11.5_MANP_CHIP_G3BF_REP1_REP2_pooled_q0.01_peak_482a
c	hr1 92831739 92832881 1143 92832273 26.00 15.53067 6.33254 12	.29179 E11.5_MANP_CHIP_G3BF_REP1_REP2_pooled_q0.01_peak_482b
c	hr1 92831739 92832881 1143 92832459 19.00 10.98767 5.46572 7.	97026 E11.5_MANP_CHIP_G3BF_REP1_REP2_pooled_q0.01_peak_482c
c	hr1 92831739 92832881 1143 92832784 22.00 13.74746 6.28558 10	.57194 E11.5_MANP_CHIP_G3BF_REP1_REP2_pooled_q0.01_peak_482d
c	hr1 92834105 92834263 159 92834158 11.00 4.64076 3.27943 2.08	535 E11.5_MANP_CHIP_G3BF_REP1_REP2_pooled_q0.01_peak_483
c	hr1 92906807 92907405 599 92906897 13.00 6.06527 3.82600 3.38	153 E11.5_MANP_CHIP_G3BF_REP1_REP2_pooled_q0.01_peak_484a
c	hr1 92906807 92907405 599 92907299 20.00 11.41729 5.49669 8.3	8526 E11.5_MANP_CHIP_G3BF_REP1_REP2_pooled_q0.01_peak_484b
c	hr1 92910575 92910744 170 92910626 11.00 4.64076 3.27943 2.08	535 E11.5_MANP_CHIP_G3BF_REP1_REP2_pooled_q0.01_peak_485
c	hr1 92911017 92911213 197 92911120 17.00 7.81106 4.17946 5.00	598 E11.5_MANP_CHIP_G3BF_REP1_REP2_pooled_q0.01_peak_486
c	hr1 92934792 92934975 184 92934879 16.00 7.63386 4.23412 4.83	112 E11.5_MANP_CHIP_G3BF_REP1_REP2_pooled_q0.01_peak_487
c	hr1 93176595 93177414 820 93176793 31.00 16.22535 5.74592 12.	95202 E11.5_MANP_CHIP_G3BF_REP1_REP2_pooled_q0.01_peak_488a
c	hr1 93176595 93177414 820 93177277 30.00 13.85328 4.98240 10.	67613 E11.5_MANP_CHIP_G3BF_REP1_REP2_pooled_q0.01_peak_488b
c	hr1 93206439 93206612 174 93206524 20.00 10.88916 5.23039 7.9	0424 E11.5_MANP_CHIP_G3BF_REP1_REP2_pooled_q0.01_peak_489
c	hr1 93272605 93272831 227 93272725 24.00 15.68020 6.83215 12.	41189 E11.5_MANP_CHIP_G3BF_REP1_REP2_pooled_q0.01_peak_490
c	hr1 93305500 93305984 485 93305687 17.00 7.89603 4.22169 5.08	356 E11.5_MANP_CHIP_G3BF_REP1_REP2_pooled_q0.01_peak_491a
c	hr1 93305500 93305984 485 93305905 14.00 6.82220 4.09929 4.07	683 E11.5_MANP_CHIP_G3BF_REP1_REP2_pooled_q0.01_peak_491b
c	hr1 93342575 93342784 210 93342644 13.00 6.06527 3.82600 3.38	153 E11.5_MANP_CHIP_G3BF_REP1_REP2_pooled_q0.01_peak_492
c	hr1 93343070 93343389 320 93343246 16.00 7.14960 3.98715 4.39	330 E11.5_MANP_CHIP_G3BF_REP1_REP2_pooled_q0.01_peak_493
c	hr1 93343699 93344037 339 93343891 23.00 14.15814 6.28193 10.	97878 E11.5_MANP_CHIP_G3BF_REP1_REP2_pooled_q0.01_peak_494
c	hr1 93444930 93445712 783 93445058 22.00 11.95153 5.39439 8.8	7686 E11.5_MANP_CHIP_G3BF_REP1_REP2_pooled_q0.01_peak_495a
c	hr1 93444930 93445712 783 93445363 34.00 26.26973 9.56501 22.	59474 E11.5_MANP_CHIP_G3BF_REP1_REP2_pooled_q0.01_peak_495b
c	hr1 93477969 93479417 1449 93478334 175.00 231.29291 41.27878	225.69597 E11.5_MANP_CHIP_G3BF_REP1_REP2_pooled_q0.01_peak_496a
c	hr1 93477969 93479417 1449 93479154 36.00 28.54655 10.11158 2	4.80025 E11.5_MANP_CHIP_G3BF_REP1_REP2_pooled_q0.01_peak_496b
c	hr1 93479492 93479684 193 93479547 12.00 5.33746 3.55272 2.71	634 E11.5_MANP_CHIP_G3BF_REP1_REP2_pooled_q0.01_peak_497
c	hr1 93511624 93512339 716 93511717 15.00 7.60646 4.37258 4.80	472 E11.5_MANP_CHIP_G3BF_REP1_REP2_pooled_q0.01_peak_498a
c	hr1 93511624 93512339 716 93512088 15.00 7.60646 4.37258 4.80	472 E11.5_MANP_CHIP_G3BF_REP1_REP2_pooled_q0.01_peak_498b
c	hr1 93635249 93635691 443 93635555 30.00 15.37788 5.56636 12.	14984 E11.5_MANP_CHIP_G3BF_REP1_REP2_pooled_q0.01_peak_499
c	hr1 93668920 93669068 149 93668960 12.00 5.33746 3.55272 2.71	634 E11.5_MANP_CHIP_G3BF_REP1_REP2_pooled_q0.01_peak_500
c	hr1 93685756 93686057 302 93686013 13.00 6.06527 3.82600 3.38	153 E11.5_MANP_CHIP_G3BF_REP1_REP2_pooled_q0.01_peak_501
c	hr1 93686320 93686921 602 93686486 19.00 10.98767 5.46572 7.9	7026 E11.5_MANP_CHIP_G3BF_REP1_REP2_pooled_q0.01_peak_502a
c	hr1 93686320 93686921 602 93686691 14.00 4.80458 3.05099 2.24	391 E11.5_MANP_CHIP_G3BF_REP1_REP2_pooled_q0.01_peak_502b
c	hr1 93686320 93686921 602 93686782 14.00 6.82220 4.09929 4.07	683 E11.5_MANP_CHIP_G3BF_REP1_REP2_pooled_q0.01_peak_502c
c	hr1 93753910 93755548 1639 93754007 15.00 7.60646 4.37258 4.8	0472 E11.5_MANP_CHIP_G3BF_REP1_REP2_pooled_q0.01_peak_503a
c	hr1 93753910 93755548 1639 93754247 15.00 7.60646 4.37258 4.8	0472 E11.5_MANP_CHIP_G3BF_REP1_REP2_pooled_q0.01_peak_503b
c	hr1 93753910 93755548 1639 93754534 26.00 17.68052 7.37872 14	.32329 E11.5_MANP_CHIP_G3BF_REP1_REP2_pooled_q0.01_peak_503c
c	hr1 93753910 93755548 1639 93755010 25.00 16.67223 7.10544 13	.35840 E11.5_MANP_CHIP_G3BF_REP1_REP2_pooled_q0.01_peak_503d
c	hr1 93753910 93755548 1639 93755472 16.00 8.41648 4.64586 5.5	5904 E11.5_MANP_CHIP_G3BF_REP1_REP2_pooled_q0.01_peak_503e
c	hr1 93801588 93801921 334 93801816 21.00 9.62773 4.47479 6.70	316 E11.5_MANP_CHIP_G3BF_REP1_REP2_pooled_q0.01_peak_504
c	hr1 93804034 93804248 215 93804131 23.00 11.94145 5.21904 8.8	7252 E11.5_MANP_CHIP_G3BF_REP1_REP2_pooled_q0.01_peak_505
c	hr1 93825112 93825526 415 93825341 24.00 15.68020 6.83215 12.	41189 E11.5_MANP_CHIP_G3BF_REP1_REP2_pooled_q0.01_peak_506
c	hr1 95313621 95314100 480 95313791 25.00 12.82373 5.28839 9.6	9685 E11.5_MANP_CHIP_G3BF_REP1_REP2_pooled_q0.01_peak_507
c	hr1 95830852 95831041 190 95830907 12.00 5.33746 3.55272 2.71	634 E11.5_MANP_CHIP_G3BF_REP1_REP2_pooled_q0.01_peak_508
c	hr1 97660748 97660968 221 97660870 14.00 4.80458 3.05099 2.24	391 E11.5_MANP_CHIP_G3BF_REP1_REP2_pooled_q0.01_peak_509
c	hr1 97661536 97661988 453 97661795 21.00 12.80816 6.01229 9.6	8985 E11.5_MANP_CHIP_G3BF_REP1_REP2_pooled_q0.01_peak_510
c	hr1 97769671 97770549 879 97769907 22.00 11.95153 5.39439 8.8	7686 E11.5_MANP_CHIP_G3BF_REP1_REP2_pooled_q0.01_peak_511a
c	hr1 97769671 97770549 879 97770376 17.00 9.25085 4.91915 6.33	859 E11.5_MANP_CHIP_G3BF_REP1_REP2_pooled_q0.01_peak_511b
c	hr1 98051123 98051359 237 98051261 23.00 14.70505 6.55886 11.	48259 E11.5_MANP_CHIP_G3BF_REP1_REP2_pooled_q0.01_peak_512
c	hr1 99772244 99772489 246 99772377 19.00 9.45664 4.69077 6.53	596 E11.5_MANP_CHIP_G3BF_REP1_REP2_pooled_q0.01_peak_513
c	hr1 100231495 100231807 313 100231584 15.00 7.26249 4.18795 4	.50415 E11.5_MANP_CHIP_G3BF_REP1_REP2_pooled_q0.01_peak_514a
c	hr1 100231495 100231807 313 100231721 15.00 7.06624 4.08399 4	.31840 E11.5_MANP_CHIP_G3BF_REP1_REP2_pooled_q0.01_peak_514b
c	hr1 105663251 105663666 416 105663469 21.00 11.10059 5.15985	8.07674 E11.5_MANP_CHIP_G3BF_REP1_REP2_pooled_q0.01_peak_515
c	hr1 105663852 105664294 443 105664046 27.00 18.70449 7.65201	15.30417 E11.5_MANP_CHIP_G3BF_REP1_REP2_pooled_q0.01_peak_516
c	hr1 105819846 105820036 191 105819957 16.00 5.19348 3.05252 2	.61892 E11.5_MANP_CHIP_G3BF_REP1_REP2_pooled_q0.01_peak_517
c	hr1 105991355 105991505 151 105991402 11.00 4.64076 3.27943 2	.08535 E11.5_MANP_CHIP_G3BF_REP1_REP2_pooled_q0.01_peak_518
c	hr1 106171642 106171794 153 106171728 14.00 6.82220 4.09929 4	.07683 E11.5_MANP_CHIP_G3BF_REP1_REP2_pooled_q0.01_peak_519
c	hr1 106171874 106172047 174 106171969 13.00 6.06527 3.82600 3	.38153 E11.5_MANP_CHIP_G3BF_REP1_REP2_pooled_q0.01_peak_520
c	hr1 106172444 106172984 541 106172525 17.00 7.89603 4.22169 5	.08356 E11.5_MANP_CHIP_G3BF_REP1_REP2_pooled_q0.01_peak_521a
c	hr1 106172444 106172984 541 106172751 11.00 4.64076 3.27943 2	.08535 E11.5_MANP_CHIP_G3BF_REP1_REP2_pooled_q0.01_peak_521b
c	hr1 106172444 106172984 541 106172925 18.00 9.68839 4.97319 6	.76243 E11.5_MANP_CHIP_G3BF_REP1_REP2_pooled_q0.01_peak_521c
c	hr1 106372549 106372759 211 106372627 19.00 10.98767 5.46572	7.97026 E11.5_MANP_CHIP_G3BF_REP1_REP2_pooled_q0.01_peak_522
c	hr1 106629899 106630327 429 106630173 20.00 11.88794 5.73901	8.81922 E11.5_MANP_CHIP_G3BF_REP1_REP2_pooled_q0.01_peak_523
c	hr1 106713532 106714330 799 106713809 17.00 9.25085 4.91915 6	.33859 E11.5_MANP_CHIP_G3BF_REP1_REP2_pooled_q0.01_peak_524a
c	hr1 106713532 106714330 799 106714156 23.00 14.70505 6.55886	11.48259 E11.5_MANP_CHIP_G3BF_REP1_REP2_pooled_q0.01_peak_524b
c	hr1 106714484 106714789 306 106714624 40.00 33.23634 11.20473	29.35288 E11.5_MANP_CHIP_G3BF_REP1_REP2_pooled_q0.01_peak_525
c	hr1 106759501 106760076 576 106759937 48.00 43.10269 13.39101	38.99024 E11.5_MANP_CHIP_G3BF_REP1_REP2_pooled_q0.01_peak_526
c	hr1 106796161 106796684 524 106796239 15.00 7.46699 4.29735 4	.70223 E11.5_MANP_CHIP_G3BF_REP1_REP2_pooled_q0.01_peak_527a
c	hr1 106796161 106796684 524 106796550 20.00 10.26867 4.92531	7.29611 E11.5_MANP_CHIP_G3BF_REP1_REP2_pooled_q0.01_peak_527b
c	hr1 107774494 107774734 241 107774592 33.00 25.14942 9.29172	21.51036 E11.5_MANP_CHIP_G3BF_REP1_REP2_pooled_q0.01_peak_528
c	hr1 111864359 111864908 550 111864809 24.00 11.99886 5.08499	8.92108 E11.5_MANP_CHIP_G3BF_REP1_REP2_pooled_q0.01_peak_529
c	hr1 118310825 118311268 444 118311055 21.00 11.10059 5.15985	8.07674 E11.5_MANP_CHIP_G3BF_REP1_REP2_pooled_q0.01_peak_530
c	hr1 118389206 118389796 591 118389625 18.00 10.10829 5.19243	7.14298 E11.5_MANP_CHIP_G3BF_REP1_REP2_pooled_q0.01_peak_531
c	hr1 118389946 118390373 428 118390115 17.00 6.73634 3.66119 4	.03008 E11.5_MANP_CHIP_G3BF_REP1_REP2_pooled_q0.01_peak_532
c	hr1 118459077 118459244 168 118459164 18.00 10.10829 5.19243	7.14298 E11.5_MANP_CHIP_G3BF_REP1_REP2_pooled_q0.01_peak_533
c	hr1 119047868 119048159 292 119048039 19.00 10.98767 5.46572	7.97026 E11.5_MANP_CHIP_G3BF_REP1_REP2_pooled_q0.01_peak_534
c	hr1 119052074 119052289 216 119052203 13.00 6.06527 3.82600 3	.38153 E11.5_MANP_CHIP_G3BF_REP1_REP2_pooled_q0.01_peak_535
c	hr1 119052411 119053886 1476 119052524 16.00 8.41648 4.64586	5.55904 E11.5_MANP_CHIP_G3BF_REP1_REP2_pooled_q0.01_peak_536a
c	hr1 119052411 119053886 1476 119052726 19.00 10.98767 5.46572	7.97026 E11.5_MANP_CHIP_G3BF_REP1_REP2_pooled_q0.01_peak_536b
c	hr1 119052411 119053886 1476 119053014 22.00 13.74746 6.28558	10.57194 E11.5_MANP_CHIP_G3BF_REP1_REP2_pooled_q0.01_peak_536c
c	hr1 119052411 119053886 1476 119053430 35.00 27.40221 9.83829	23.69099 E11.5_MANP_CHIP_G3BF_REP1_REP2_pooled_q0.01_peak_536d
c	hr1 119054094 119054470 377 119054386 20.00 11.88794 5.73901	8.81922 E11.5_MANP_CHIP_G3BF_REP1_REP2_pooled_q0.01_peak_537
c	hr1 119526246 119526674 429 119526339 16.00 8.41648 4.64586 5	.55904 E11.5_MANP_CHIP_G3BF_REP1_REP2_pooled_q0.01_peak_538
c	hr1 119648387 119649006 620 119648501 16.00 8.41648 4.64586 5	.55904 E11.5_MANP_CHIP_G3BF_REP1_REP2_pooled_q0.01_peak_539a
c	hr1 119648387 119649006 620 119648864 25.00 15.73212 6.63648	12.46249 E11.5_MANP_CHIP_G3BF_REP1_REP2_pooled_q0.01_peak_539b
c	hr1 119836998 119837500 503 119837215 24.00 15.68020 6.83215	12.41189 E11.5_MANP_CHIP_G3BF_REP1_REP2_pooled_q0.01_peak_540
c	hr1 120120585 120120972 388 120120882 18.00 10.10829 5.19243	7.14298 E11.5_MANP_CHIP_G3BF_REP1_REP2_pooled_q0.01_peak_541
c	hr1 120121193 120121662 470 120121360 17.00 9.25085 4.91915 6	.33859 E11.5_MANP_CHIP_G3BF_REP1_REP2_pooled_q0.01_peak_542a
c	hr1 120121193 120121662 470 120121574 11.00 4.64076 3.27943 2	.08535 E11.5_MANP_CHIP_G3BF_REP1_REP2_pooled_q0.01_peak_542b
c	hr1 120159984 120160246 263 120160100 24.00 15.68020 6.83215	12.41189 E11.5_MANP_CHIP_G3BF_REP1_REP2_pooled_q0.01_peak_543
c	hr1 121327872 121328127 256 121327968 18.00 10.10829 5.19243	7.14298 E11.5_MANP_CHIP_G3BF_REP1_REP2_pooled_q0.01_peak_544
c	hr1 121441248 121441404 157 121441325 14.00 6.82220 4.09929 4	.07683 E11.5_MANP_CHIP_G3BF_REP1_REP2_pooled_q0.01_peak_545
c	hr1 121567498 121568207 710 121567634 18.00 10.10829 5.19243	7.14298 E11.5_MANP_CHIP_G3BF_REP1_REP2_pooled_q0.01_peak_546a
c	hr1 121567498 121568207 710 121567865 20.00 10.26867 4.92531	7.29611 E11.5_MANP_CHIP_G3BF_REP1_REP2_pooled_q0.01_peak_546b
c	hr1 121567498 121568207 710 121568133 15.00 7.60646 4.37258 4	.80472 E11.5_MANP_CHIP_G3BF_REP1_REP2_pooled_q0.01_peak_546c
c	hr1 121782344 121782530 187 121782433 16.00 8.41648 4.64586 5	.55904 E11.5_MANP_CHIP_G3BF_REP1_REP2_pooled_q0.01_peak_547
c	hr1 121945491 121945646 156 121945563 13.00 6.06527 3.82600 3	.38153 E11.5_MANP_CHIP_G3BF_REP1_REP2_pooled_q0.01_peak_548
c	hr1 122044901 122045062 162 122044986 20.00 11.88794 5.73901	8.81922 E11.5_MANP_CHIP_G3BF_REP1_REP2_pooled_q0.01_peak_549
c	hr1 125434885 125435630 746 125435360 38.00 24.84312 7.93259	21.22897 E11.5_MANP_CHIP_G3BF_REP1_REP2_pooled_q0.01_peak_550
c	hr1 125435702 125436065 364 125435959 28.00 17.41656 6.80162	14.08928 E11.5_MANP_CHIP_G3BF_REP1_REP2_pooled_q0.01_peak_551
c	hr1 125560342 125561419 1078 125560636 92.00 97.69034 21.8120	8 92.86476 E11.5_MANP_CHIP_G3BF_REP1_REP2_pooled_q0.01_peak_552a
c	hr1 125560342 125561419 1078 125561131 26.00 16.70029 6.89173	13.38561 E11.5_MANP_CHIP_G3BF_REP1_REP2_pooled_q0.01_peak_552b
c	hr1 125560342 125561419 1078 125561353 18.00 10.10829 5.19243	7.14298 E11.5_MANP_CHIP_G3BF_REP1_REP2_pooled_q0.01_peak_552c
c	hr1 125910212 125910377 166 125910281 11.00 4.64076 3.27943 2	.08535 E11.5_MANP_CHIP_G3BF_REP1_REP2_pooled_q0.01_peak_553
c	hr1 125910758 125911153 396 125910967 17.00 9.25085 4.91915 6	.33859 E11.5_MANP_CHIP_G3BF_REP1_REP2_pooled_q0.01_peak_554
c	hr1 127204868 127205310 443 127205114 21.00 11.10059 5.15985	8.07674 E11.5_MANP_CHIP_G3BF_REP1_REP2_pooled_q0.01_peak_555
c	hr1 127217797 127218082 286 127217936 32.00 24.04164 9.01844	20.43975 E11.5_MANP_CHIP_G3BF_REP1_REP2_pooled_q0.01_peak_556
c	hr1 127442866 127443242 377 127443138 31.00 22.94677 8.74515	19.38261 E11.5_MANP_CHIP_G3BF_REP1_REP2_pooled_q0.01_peak_557
c	hr1 127496831 127497053 223 127496938 25.00 16.67223 7.10544	13.35840 E11.5_MANP_CHIP_G3BF_REP1_REP2_pooled_q0.01_peak_558
c	hr1 127537486 127537885 400 127537675 65.00 47.59179 10.60768	43.39577 E11.5_MANP_CHIP_G3BF_REP1_REP2_pooled_q0.01_peak_559
c	hr1 127773726 127773911 186 127773804 18.00 10.10829 5.19243	7.14298 E11.5_MANP_CHIP_G3BF_REP1_REP2_pooled_q0.01_peak_560
c	hr1 127774100 127774879 780 127774379 35.00 27.40221 9.83829	23.69099 E11.5_MANP_CHIP_G3BF_REP1_REP2_pooled_q0.01_peak_561a
c	hr1 127774100 127774879 780 127774715 20.00 10.26867 4.92531	7.29611 E11.5_MANP_CHIP_G3BF_REP1_REP2_pooled_q0.01_peak_561b
c	hr1 127868744 127869144 401 127868867 24.00 15.68020 6.83215	12.41189 E11.5_MANP_CHIP_G3BF_REP1_REP2_pooled_q0.01_peak_562
c	hr1 128103331 128103561 231 128103447 22.00 13.74746 6.28558	10.57194 E11.5_MANP_CHIP_G3BF_REP1_REP2_pooled_q0.01_peak_563
c	hr1 128103710 128103873 164 128103781 15.00 7.60646 4.37258 4	.80472 E11.5_MANP_CHIP_G3BF_REP1_REP2_pooled_q0.01_peak_564
c	hr1 128244264 128244831 568 128244445 24.00 10.59585 4.48900	7.61518 E11.5_MANP_CHIP_G3BF_REP1_REP2_pooled_q0.01_peak_565
c	hr1 128359115 128359716 602 128359251 21.00 12.80816 6.01229	9.68985 E11.5_MANP_CHIP_G3BF_REP1_REP2_pooled_q0.01_peak_566a
c	hr1 128359115 128359716 602 128359576 34.00 26.26973 9.56501	22.59474 E11.5_MANP_CHIP_G3BF_REP1_REP2_pooled_q0.01_peak_566b
c	hr1 128416771 128417368 598 128417024 25.00 16.67223 7.10544	13.35840 E11.5_MANP_CHIP_G3BF_REP1_REP2_pooled_q0.01_peak_567a
c	hr1 128416771 128417368 598 128417227 30.00 21.86518 8.47186	18.34202 E11.5_MANP_CHIP_G3BF_REP1_REP2_pooled_q0.01_peak_567b
c	hr1 130717132 130717896 765 130717202 17.00 6.73634 3.66119 4	.03008 E11.5_MANP_CHIP_G3BF_REP1_REP2_pooled_q0.01_peak_568a
c	hr1 130717132 130717896 765 130717388 15.00 7.60646 4.37258 4	.80472 E11.5_MANP_CHIP_G3BF_REP1_REP2_pooled_q0.01_peak_568b
c	hr1 130717132 130717896 765 130717628 22.00 8.06499 3.69662 5	.24993 E11.5_MANP_CHIP_G3BF_REP1_REP2_pooled_q0.01_peak_568c
c	hr1 130717132 130717896 765 130717802 19.00 10.98767 5.46572	7.97026 E11.5_MANP_CHIP_G3BF_REP1_REP2_pooled_q0.01_peak_568d
c	hr1 131088982 131089163 182 131089076 18.00 10.10829 5.19243	7.14298 E11.5_MANP_CHIP_G3BF_REP1_REP2_pooled_q0.01_peak_569
c	hr1 131097030 131097806 777 131097326 26.00 12.12893 4.84812	9.04830 E11.5_MANP_CHIP_G3BF_REP1_REP2_pooled_q0.01_peak_570a
c	hr1 131097030 131097806 777 131097725 20.00 11.88794 5.73901	8.81922 E11.5_MANP_CHIP_G3BF_REP1_REP2_pooled_q0.01_peak_570b
c	hr1 131137762 131137922 161 131137843 16.00 8.41648 4.64586 5	.55904 E11.5_MANP_CHIP_G3BF_REP1_REP2_pooled_q0.01_peak_571
c	hr1 131138083 131138261 179 131138162 17.00 9.09092 4.83452 6	.21578 E11.5_MANP_CHIP_G3BF_REP1_REP2_pooled_q0.01_peak_572
c	hr1 131526144 131527370 1227 131526203 14.00 6.82220 4.09929	4.07683 E11.5_MANP_CHIP_G3BF_REP1_REP2_pooled_q0.01_peak_573a
c	hr1 131526144 131527370 1227 131526421 13.00 6.06527 3.82600	3.38153 E11.5_MANP_CHIP_G3BF_REP1_REP2_pooled_q0.01_peak_573b
c	hr1 131526144 131527370 1227 131526897 15.00 6.42739 3.75262	3.72916 E11.5_MANP_CHIP_G3BF_REP1_REP2_pooled_q0.01_peak_573c
c	hr1 131526144 131527370 1227 131527186 22.00 10.40017 4.67819	7.42281 E11.5_MANP_CHIP_G3BF_REP1_REP2_pooled_q0.01_peak_573d
c	hr1 131527989 131528397 409 131528131 24.00 13.70739 5.86346	10.56365 E11.5_MANP_CHIP_G3BF_REP1_REP2_pooled_q0.01_peak_574
c	hr1 131827665 131828390 726 131827763 20.00 11.69725 5.64027	8.66180 E11.5_MANP_CHIP_G3BF_REP1_REP2_pooled_q0.01_peak_575a
c	hr1 131827665 131828390 726 131828135 48.00 43.10269 13.39101	38.99024 E11.5_MANP_CHIP_G3BF_REP1_REP2_pooled_q0.01_peak_575b
c	hr1 131910129 131910309 181 131910215 21.00 12.80816 6.01229	9.68985 E11.5_MANP_CHIP_G3BF_REP1_REP2_pooled_q0.01_peak_576
c	hr1 131910419 131911432 1014 131910811 45.00 39.33184 12.5711	5 35.30061 E11.5_MANP_CHIP_G3BF_REP1_REP2_pooled_q0.01_peak_577a
c	hr1 131910419 131911432 1014 131911050 30.00 21.86518 8.47186	18.34202 E11.5_MANP_CHIP_G3BF_REP1_REP2_pooled_q0.01_peak_577b
c	hr1 131910419 131911432 1014 131911304 18.00 10.10829 5.19243	7.14298 E11.5_MANP_CHIP_G3BF_REP1_REP2_pooled_q0.01_peak_577c
c	hr1 132007318 132008316 999 132007416 22.00 13.74746 6.28558	10.57194 E11.5_MANP_CHIP_G3BF_REP1_REP2_pooled_q0.01_peak_578a
c	hr1 132007318 132008316 999 132007679 28.00 19.74358 7.92529	16.30083 E11.5_MANP_CHIP_G3BF_REP1_REP2_pooled_q0.01_peak_578b
c	hr1 132007318 132008316 999 132007890 35.00 27.40221 9.83829	23.69099 E11.5_MANP_CHIP_G3BF_REP1_REP2_pooled_q0.01_peak_578c
c	hr1 132007318 132008316 999 132008231 21.00 12.80816 6.01229	9.68985 E11.5_MANP_CHIP_G3BF_REP1_REP2_pooled_q0.01_peak_578d
c	hr1 132008430 132008578 149 132008500 13.00 6.06527 3.82600 3	.38153 E11.5_MANP_CHIP_G3BF_REP1_REP2_pooled_q0.01_peak_579
c	hr1 132116740 132116888 149 132116831 15.00 6.42739 3.75262 3	.72916 E11.5_MANP_CHIP_G3BF_REP1_REP2_pooled_q0.01_peak_580
c	hr1 132190665 132190967 303 132190909 14.00 6.82220 4.09929 4	.07683 E11.5_MANP_CHIP_G3BF_REP1_REP2_pooled_q0.01_peak_581
c	hr1 132192059 132192314 256 132192154 23.00 11.19078 4.88159	8.16244 E11.5_MANP_CHIP_G3BF_REP1_REP2_pooled_q0.01_peak_582
c	hr1 132256232 132256380 149 132256304 15.00 7.60646 4.37258 4	.80472 E11.5_MANP_CHIP_G3BF_REP1_REP2_pooled_q0.01_peak_583
c	hr1 132391344 132391559 216 132391448 24.00 15.68020 6.83215	12.41189 E11.5_MANP_CHIP_G3BF_REP1_REP2_pooled_q0.01_peak_584
c	hr1 132391781 132391929 149 132391886 15.00 6.42739 3.75262 3	.72916 E11.5_MANP_CHIP_G3BF_REP1_REP2_pooled_q0.01_peak_585
c	hr1 132417526 132418106 581 132417834 28.00 19.74358 7.92529	16.30083 E11.5_MANP_CHIP_G3BF_REP1_REP2_pooled_q0.01_peak_586
c	hr1 132476993 132477230 238 132477167 16.00 8.41648 4.64586 5	.55904 E11.5_MANP_CHIP_G3BF_REP1_REP2_pooled_q0.01_peak_587
c	hr1 132477401 132477561 161 132477475 16.00 7.14960 3.98715 4	.39330 E11.5_MANP_CHIP_G3BF_REP1_REP2_pooled_q0.01_peak_588
c	hr1 132624887 132625417 531 132625002 36.00 22.85559 7.52579	19.31590 E11.5_MANP_CHIP_G3BF_REP1_REP2_pooled_q0.01_peak_589a
c	hr1 132624887 132625417 531 132625280 51.00 32.80243 8.35757	28.94655 E11.5_MANP_CHIP_G3BF_REP1_REP2_pooled_q0.01_peak_589b
c	hr1 132733928 132734169 242 132734043 42.00 35.64489 11.75130	31.70040 E11.5_MANP_CHIP_G3BF_REP1_REP2_pooled_q0.01_peak_590
c	hr1 132799416 132799570 155 132799486 16.00 7.83645 4.33924 5	.03032 E11.5_MANP_CHIP_G3BF_REP1_REP2_pooled_q0.01_peak_591
c	hr1 132888280 132888428 149 132888351 18.00 10.10829 5.19243	7.14298 E11.5_MANP_CHIP_G3BF_REP1_REP2_pooled_q0.01_peak_592
c	hr1 133025002 133025732 731 133025245 46.00 40.57973 12.84444	36.52060 E11.5_MANP_CHIP_G3BF_REP1_REP2_pooled_q0.01_peak_593a
c	hr1 133025002 133025732 731 133025610 20.00 11.88794 5.73901	8.81922 E11.5_MANP_CHIP_G3BF_REP1_REP2_pooled_q0.01_peak_593b
c	hr1 133033809 133034081 273 133033944 19.00 10.98767 5.46572	7.97026 E11.5_MANP_CHIP_G3BF_REP1_REP2_pooled_q0.01_peak_594
c	hr1 133045825 133046606 782 133046246 28.00 19.74358 7.92529	16.30083 E11.5_MANP_CHIP_G3BF_REP1_REP2_pooled_q0.01_peak_595
c	hr1 133077197 133077741 545 133077344 69.00 65.51574 16.41770	61.03783 E11.5_MANP_CHIP_G3BF_REP1_REP2_pooled_q0.01_peak_596a
c	hr1 133077197 133077741 545 133077611 18.00 7.42758 3.86459 4	.66513 E11.5_MANP_CHIP_G3BF_REP1_REP2_pooled_q0.01_peak_596b
c	hr1 133131177 133132002 826 133131426 30.00 21.86518 8.47186	18.34202 E11.5_MANP_CHIP_G3BF_REP1_REP2_pooled_q0.01_peak_597a
c	hr1 133131177 133132002 826 133131712 30.00 19.36089 7.27069	15.94879 E11.5_MANP_CHIP_G3BF_REP1_REP2_pooled_q0.01_peak_597b
c	hr1 133181064 133181260 197 133181179 21.00 12.80816 6.01229	9.68985 E11.5_MANP_CHIP_G3BF_REP1_REP2_pooled_q0.01_peak_598
c	hr1 133237750 133237913 164 133237827 20.00 11.88794 5.73901	8.81922 E11.5_MANP_CHIP_G3BF_REP1_REP2_pooled_q0.01_peak_599
c	hr1 133306934 133307131 198 133307070 16.00 8.41648 4.64586 5	.55904 E11.5_MANP_CHIP_G3BF_REP1_REP2_pooled_q0.01_peak_600
c	hr1 133323267 133323451 185 133323351 15.00 7.60646 4.37258 4	.80472 E11.5_MANP_CHIP_G3BF_REP1_REP2_pooled_q0.01_peak_601
c	hr1 133423665 133423813 149 133423746 14.00 6.82220 4.09929 4	.07683 E11.5_MANP_CHIP_G3BF_REP1_REP2_pooled_q0.01_peak_602
c	hr1 133423944 133424360 417 133424064 16.00 8.41648 4.64586 5	.55904 E11.5_MANP_CHIP_G3BF_REP1_REP2_pooled_q0.01_peak_603a
c	hr1 133423944 133424360 417 133424246 18.00 10.10829 5.19243	7.14298 E11.5_MANP_CHIP_G3BF_REP1_REP2_pooled_q0.01_peak_603b
c	hr1 133448687 133448836 150 133448766 17.00 7.89603 4.22169 5	.08356 E11.5_MANP_CHIP_G3BF_REP1_REP2_pooled_q0.01_peak_604
c	hr1 133596641 133596989 349 133596848 30.00 20.12866 7.62865	16.68128 E11.5_MANP_CHIP_G3BF_REP1_REP2_pooled_q0.01_peak_605
c	hr1 133609671 133610469 799 133610145 69.00 71.48445 19.13002	66.92284 E11.5_MANP_CHIP_G3BF_REP1_REP2_pooled_q0.01_peak_606
c	hr1 133660602 133661424 823 133660684 14.00 6.82220 4.09929 4	.07683 E11.5_MANP_CHIP_G3BF_REP1_REP2_pooled_q0.01_peak_607a
c	hr1 133660602 133661424 823 133661073 35.00 27.40221 9.83829	23.69099 E11.5_MANP_CHIP_G3BF_REP1_REP2_pooled_q0.01_peak_607b
c	hr1 133660602 133661424 823 133661257 28.00 17.41656 6.80162	14.08928 E11.5_MANP_CHIP_G3BF_REP1_REP2_pooled_q0.01_peak_607c
c	hr1 133742206 133742354 149 133742273 13.00 6.06527 3.82600 3	.38153 E11.5_MANP_CHIP_G3BF_REP1_REP2_pooled_q0.01_peak_608
c	hr1 134061075 134061372 298 134061181 36.00 28.54655 10.11158	24.80025 E11.5_MANP_CHIP_G3BF_REP1_REP2_pooled_q0.01_peak_609
c	hr1 134063315 134063541 227 134063433 15.00 7.60646 4.37258 4	.80472 E11.5_MANP_CHIP_G3BF_REP1_REP2_pooled_q0.01_peak_610
c	hr1 134273485 134273672 188 134273585 18.00 10.10829 5.19243	7.14298 E11.5_MANP_CHIP_G3BF_REP1_REP2_pooled_q0.01_peak_611
c	hr1 134299089 134299239 151 134299191 20.00 10.26867 4.92531	7.29611 E11.5_MANP_CHIP_G3BF_REP1_REP2_pooled_q0.01_peak_612
c	hr1 134361443 134361948 506 134361601 22.00 13.74746 6.28558	10.57194 E11.5_MANP_CHIP_G3BF_REP1_REP2_pooled_q0.01_peak_613a
c	hr1 134361443 134361948 506 134361812 25.00 16.43015 6.98319	13.15099 E11.5_MANP_CHIP_G3BF_REP1_REP2_pooled_q0.01_peak_613b
c	hr1 134405569 134406181 613 134405862 53.00 45.01389 12.66508	40.86836 E11.5_MANP_CHIP_G3BF_REP1_REP2_pooled_q0.01_peak_614
c	hr1 134415113 134415305 193 134415234 15.00 6.42739 3.75262 3	.72916 E11.5_MANP_CHIP_G3BF_REP1_REP2_pooled_q0.01_peak_615
c	hr1 134415449 134415973 525 134415620 36.00 28.54655 10.11158	24.80025 E11.5_MANP_CHIP_G3BF_REP1_REP2_pooled_q0.01_peak_616
c	hr1 134455501 134455799 299 134455665 14.00 6.82220 4.09929 4	.07683 E11.5_MANP_CHIP_G3BF_REP1_REP2_pooled_q0.01_peak_617
c	hr1 134556594 134556987 394 134556691 20.00 11.88794 5.73901	8.81922 E11.5_MANP_CHIP_G3BF_REP1_REP2_pooled_q0.01_peak_618a
c	hr1 134556594 134556987 394 134556896 23.00 14.70505 6.55886	11.48259 E11.5_MANP_CHIP_G3BF_REP1_REP2_pooled_q0.01_peak_618b
c	hr1 134560053 134561486 1434 134560255 36.00 22.85559 7.52579	19.31590 E11.5_MANP_CHIP_G3BF_REP1_REP2_pooled_q0.01_peak_619a
c	hr1 134560053 134561486 1434 134560669 35.00 27.40221 9.83829	23.69099 E11.5_MANP_CHIP_G3BF_REP1_REP2_pooled_q0.01_peak_619b
c	hr1 134560053 134561486 1434 134561097 34.00 23.41066 8.20885	19.83944 E11.5_MANP_CHIP_G3BF_REP1_REP2_pooled_q0.01_peak_619c
c	hr1 134664957 134665148 192 134665052 23.00 14.70505 6.55886	11.48259 E11.5_MANP_CHIP_G3BF_REP1_REP2_pooled_q0.01_peak_620
c	hr1 134955586 134955980 395 134955896 22.00 10.40017 4.67819	7.42281 E11.5_MANP_CHIP_G3BF_REP1_REP2_pooled_q0.01_peak_621
c	hr1 134962629 134962847 219 134962688 12.00 5.33746 3.55272 2	.71634 E11.5_MANP_CHIP_G3BF_REP1_REP2_pooled_q0.01_peak_622
c	hr1 134976251 134976493 243 134976363 19.00 8.14055 4.06799 5	.32214 E11.5_MANP_CHIP_G3BF_REP1_REP2_pooled_q0.01_peak_623
c	hr1 135146289 135146530 242 135146394 15.00 7.06624 4.08399 4	.31840 E11.5_MANP_CHIP_G3BF_REP1_REP2_pooled_q0.01_peak_624
c	hr1 135146844 135147753 910 135146975 36.00 24.89268 8.40139	21.27824 E11.5_MANP_CHIP_G3BF_REP1_REP2_pooled_q0.01_peak_625
c	hr1 135283352 135284128 777 135283535 20.00 11.88794 5.73901	8.81922 E11.5_MANP_CHIP_G3BF_REP1_REP2_pooled_q0.01_peak_626a
c	hr1 135283352 135284128 777 135283848 31.00 22.94677 8.74515	19.38261 E11.5_MANP_CHIP_G3BF_REP1_REP2_pooled_q0.01_peak_626b
c	hr1 135313246 135313715 470 135313628 14.00 6.82220 4.09929 4	.07683 E11.5_MANP_CHIP_G3BF_REP1_REP2_pooled_q0.01_peak_627
c	hr1 135375082 135375504 423 135375192 24.00 15.68020 6.83215	12.41189 E11.5_MANP_CHIP_G3BF_REP1_REP2_pooled_q0.01_peak_628
c	hr1 135429959 135430792 834 135430334 32.00 24.04164 9.01844	20.43975 E11.5_MANP_CHIP_G3BF_REP1_REP2_pooled_q0.01_peak_629a
c	hr1 135429959 135430792 834 135430560 11.00 4.64076 3.27943 2	.08535 E11.5_MANP_CHIP_G3BF_REP1_REP2_pooled_q0.01_peak_629b
c	hr1 135429959 135430792 834 135430714 15.00 7.60646 4.37258 4	.80472 E11.5_MANP_CHIP_G3BF_REP1_REP2_pooled_q0.01_peak_629c
c	hr1 135510276 135510488 213 135510337 13.00 6.06527 3.82600 3	.38153 E11.5_MANP_CHIP_G3BF_REP1_REP2_pooled_q0.01_peak_630
c	hr1 135524030 135524496 467 135524130 14.00 6.82220 4.09929 4	.07683 E11.5_MANP_CHIP_G3BF_REP1_REP2_pooled_q0.01_peak_631a
c	hr1 135524030 135524496 467 135524362 29.00 20.79730 8.19858	17.31392 E11.5_MANP_CHIP_G3BF_REP1_REP2_pooled_q0.01_peak_631b
c	hr1 135634861 135635078 218 135634965 30.00 21.86518 8.47186	18.34202 E11.5_MANP_CHIP_G3BF_REP1_REP2_pooled_q0.01_peak_632
c	hr1 135687932 135688170 239 135688071 17.00 9.25085 4.91915 6	.33859 E11.5_MANP_CHIP_G3BF_REP1_REP2_pooled_q0.01_peak_633
c	hr1 135698785 135698951 167 135698857 14.00 6.82220 4.09929 4	.07683 E11.5_MANP_CHIP_G3BF_REP1_REP2_pooled_q0.01_peak_634
c	hr1 135729110 135729461 352 135729284 30.00 21.86518 8.47186	18.34202 E11.5_MANP_CHIP_G3BF_REP1_REP2_pooled_q0.01_peak_635
c	hr1 135765923 135766584 662 135766235 36.00 20.65369 6.64372	17.19692 E11.5_MANP_CHIP_G3BF_REP1_REP2_pooled_q0.01_peak_636a
c	hr1 135765923 135766584 662 135766474 17.00 7.89603 4.22169 5	.08356 E11.5_MANP_CHIP_G3BF_REP1_REP2_pooled_q0.01_peak_636b
c	hr1 135980181 135980338 158 135980257 20.00 11.88794 5.73901	8.81922 E11.5_MANP_CHIP_G3BF_REP1_REP2_pooled_q0.01_peak_637
c	hr1 136017953 136018684 732 136018163 35.00 27.40221 9.83829	23.69099 E11.5_MANP_CHIP_G3BF_REP1_REP2_pooled_q0.01_peak_638a
c	hr1 136017953 136018684 732 136018367 24.00 15.44841 6.71461	12.21472 E11.5_MANP_CHIP_G3BF_REP1_REP2_pooled_q0.01_peak_638b
c	hr1 136051398 136051570 173 136051446 13.00 6.06527 3.82600 3	.38153 E11.5_MANP_CHIP_G3BF_REP1_REP2_pooled_q0.01_peak_639
c	hr1 136131487 136131652 166 136131550 15.00 5.42355 3.25439 2	.79831 E11.5_MANP_CHIP_G3BF_REP1_REP2_pooled_q0.01_peak_640
c	hr1 136131809 136132024 216 136131947 12.00 5.33746 3.55272 2	.71634 E11.5_MANP_CHIP_G3BF_REP1_REP2_pooled_q0.01_peak_641
c	hr1 136140297 136140508 212 136140376 18.00 10.10829 5.19243	7.14298 E11.5_MANP_CHIP_G3BF_REP1_REP2_pooled_q0.01_peak_642
c	hr1 136170241 136170444 204 136170340 33.00 19.96143 6.91559	16.51522 E11.5_MANP_CHIP_G3BF_REP1_REP2_pooled_q0.01_peak_643
c	hr1 136233982 136234358 377 136234235 19.00 10.98767 5.46572	7.97026 E11.5_MANP_CHIP_G3BF_REP1_REP2_pooled_q0.01_peak_644
c	hr1 136345095 136346383 1289 136345319 21.00 12.80816 6.01229	9.68985 E11.5_MANP_CHIP_G3BF_REP1_REP2_pooled_q0.01_peak_645a
c	hr1 136345095 136346383 1289 136345744 31.00 16.22535 5.74592	12.95202 E11.5_MANP_CHIP_G3BF_REP1_REP2_pooled_q0.01_peak_645b
c	hr1 136345095 136346383 1289 136346014 34.00 23.41066 8.20885	19.83944 E11.5_MANP_CHIP_G3BF_REP1_REP2_pooled_q0.01_peak_645c
c	hr1 136415009 136415652 644 136415428 22.00 13.74746 6.28558	10.57194 E11.5_MANP_CHIP_G3BF_REP1_REP2_pooled_q0.01_peak_646
c	hr1 136551100 136551286 187 136551224 15.00 7.60646 4.37258 4	.80472 E11.5_MANP_CHIP_G3BF_REP1_REP2_pooled_q0.01_peak_647
c	hr1 136551548 136551696 149 136551639 15.00 7.60646 4.37258 4	.80472 E11.5_MANP_CHIP_G3BF_REP1_REP2_pooled_q0.01_peak_648
c	hr1 136588167 136589312 1146 136588317 17.00 9.25085 4.91915	6.33859 E11.5_MANP_CHIP_G3BF_REP1_REP2_pooled_q0.01_peak_649a
c	hr1 136588167 136589312 1146 136588482 23.00 14.70505 6.55886	11.48259 E11.5_MANP_CHIP_G3BF_REP1_REP2_pooled_q0.01_peak_649b
c	hr1 136588167 136589312 1146 136589041 133.00 172.52969 36.62	032 167.23706 E11.5_MANP_CHIP_G3BF_REP1_REP2_pooled_q0.01_peak_649c
c	hr1 136624944 136625749 806 136625033 23.00 14.70505 6.55886	11.48259 E11.5_MANP_CHIP_G3BF_REP1_REP2_pooled_q0.01_peak_650a
c	hr1 136624944 136625749 806 136625272 32.00 24.04164 9.01844	20.43975 E11.5_MANP_CHIP_G3BF_REP1_REP2_pooled_q0.01_peak_650b
c	hr1 136624944 136625749 806 136625642 15.00 7.60646 4.37258 4	.80472 E11.5_MANP_CHIP_G3BF_REP1_REP2_pooled_q0.01_peak_650c
c	hr1 136737865 136738092 228 136737959 37.00 29.70242 10.38487	25.92228 E11.5_MANP_CHIP_G3BF_REP1_REP2_pooled_q0.01_peak_651
c	hr1 136958237 136958532 296 136958392 41.00 34.43552 11.47801	30.52167 E11.5_MANP_CHIP_G3BF_REP1_REP2_pooled_q0.01_peak_652
c	hr1 137894973 137895230 258 137895092 31.00 20.35381 7.50523	16.90069 E11.5_MANP_CHIP_G3BF_REP1_REP2_pooled_q0.01_peak_653
c	hr1 137898540 137898858 319 137898696 28.00 19.74358 7.92529	16.30083 E11.5_MANP_CHIP_G3BF_REP1_REP2_pooled_q0.01_peak_654
c	hr1 137899407 137899571 165 137899478 16.00 8.41648 4.64586 5	.55904 E11.5_MANP_CHIP_G3BF_REP1_REP2_pooled_q0.01_peak_655
c	hr1 137899906 137900610 705 137899976 14.00 6.82220 4.09929 4	.07683 E11.5_MANP_CHIP_G3BF_REP1_REP2_pooled_q0.01_peak_656a
c	hr1 137899906 137900610 705 137900215 29.00 20.79730 8.19858	17.31392 E11.5_MANP_CHIP_G3BF_REP1_REP2_pooled_q0.01_peak_656b
c	hr1 137899906 137900610 705 137900511 21.00 12.80816 6.01229	9.68985 E11.5_MANP_CHIP_G3BF_REP1_REP2_pooled_q0.01_peak_656c
c	hr1 138619350 138619907 558 138619466 24.00 15.68020 6.83215	12.41189 E11.5_MANP_CHIP_G3BF_REP1_REP2_pooled_q0.01_peak_657
c	hr1 138856254 138856843 590 138856402 15.00 7.60646 4.37258 4	.80472 E11.5_MANP_CHIP_G3BF_REP1_REP2_pooled_q0.01_peak_658a
c	hr1 138856254 138856843 590 138856713 33.00 25.14942 9.29172	21.51036 E11.5_MANP_CHIP_G3BF_REP1_REP2_pooled_q0.01_peak_658b
c	hr1 138876590 138876847 258 138876680 14.00 6.82220 4.09929 4	.07683 E11.5_MANP_CHIP_G3BF_REP1_REP2_pooled_q0.01_peak_659
c	hr1 138963480 138964065 586 138963702 17.00 8.41428 4.48319 5	.55904 E11.5_MANP_CHIP_G3BF_REP1_REP2_pooled_q0.01_peak_660a
c	hr1 138963480 138964065 586 138963881 19.00 10.98767 5.46572	7.97026 E11.5_MANP_CHIP_G3BF_REP1_REP2_pooled_q0.01_peak_660b
c	hr1 138964141 138964307 167 138964212 17.00 6.73634 3.66119 4	.03008 E11.5_MANP_CHIP_G3BF_REP1_REP2_pooled_q0.01_peak_661
c	hr1 139422240 139422836 597 139422402 26.00 17.05725 7.06717	13.74051 E11.5_MANP_CHIP_G3BF_REP1_REP2_pooled_q0.01_peak_662a
c	hr1 139422240 139422836 597 139422690 20.00 10.26867 4.92531	7.29611 E11.5_MANP_CHIP_G3BF_REP1_REP2_pooled_q0.01_peak_662b
c	hr1 139454461 139454616 156 139454534 15.00 7.60646 4.37258 4	.80472 E11.5_MANP_CHIP_G3BF_REP1_REP2_pooled_q0.01_peak_663
c	hr1 139454868 139455126 259 139454960 22.00 13.53623 6.17744	10.40137 E11.5_MANP_CHIP_G3BF_REP1_REP2_pooled_q0.01_peak_664
c	hr1 141140680 141140847 168 141140760 18.00 10.10829 5.19243	7.14298 E11.5_MANP_CHIP_G3BF_REP1_REP2_pooled_q0.01_peak_665
c	hr1 142966090 142966316 227 142966194 21.00 12.80816 6.01229	9.68985 E11.5_MANP_CHIP_G3BF_REP1_REP2_pooled_q0.01_peak_666
c	hr1 143702160 143702395 236 143702220 13.00 6.06527 3.82600 3	.38153 E11.5_MANP_CHIP_G3BF_REP1_REP2_pooled_q0.01_peak_667
c	hr1 143702472 143702989 518 143702595 19.00 9.45664 4.69077 6	.53596 E11.5_MANP_CHIP_G3BF_REP1_REP2_pooled_q0.01_peak_668a
c	hr1 143702472 143702989 518 143702783 32.00 24.04164 9.01844	20.43975 E11.5_MANP_CHIP_G3BF_REP1_REP2_pooled_q0.01_peak_668b
c	hr1 143739565 143739847 283 143739693 29.00 20.79730 8.19858	17.31392 E11.5_MANP_CHIP_G3BF_REP1_REP2_pooled_q0.01_peak_669
c	hr1 143777079 143777646 568 143777148 15.00 4.61463 2.87296 2	.08535 E11.5_MANP_CHIP_G3BF_REP1_REP2_pooled_q0.01_peak_670a
c	hr1 143777079 143777646 568 143777419 21.00 12.80816 6.01229	9.68985 E11.5_MANP_CHIP_G3BF_REP1_REP2_pooled_q0.01_peak_670b
c	hr1 143777775 143778015 241 143777865 11.00 4.64076 3.27943 2	.08535 E11.5_MANP_CHIP_G3BF_REP1_REP2_pooled_q0.01_peak_671
c	hr1 144003973 144004244 272 144004096 21.00 12.80816 6.01229	9.68985 E11.5_MANP_CHIP_G3BF_REP1_REP2_pooled_q0.01_peak_672
c	hr1 144183715 144184114 400 144183863 22.00 13.53623 6.17744	10.40137 E11.5_MANP_CHIP_G3BF_REP1_REP2_pooled_q0.01_peak_673a
c	hr1 144183715 144184114 400 144183986 24.00 14.78019 6.38123	11.55643 E11.5_MANP_CHIP_G3BF_REP1_REP2_pooled_q0.01_peak_673b
c	hr1 145828460 145828622 163 145828532 13.00 6.06527 3.82600 3	.38153 E11.5_MANP_CHIP_G3BF_REP1_REP2_pooled_q0.01_peak_674
c	hr1 146106878 146107234 357 146107064 142.00 175.53293 33.539	01 170.22758 E11.5_MANP_CHIP_G3BF_REP1_REP2_pooled_q0.01_peak_675
c	hr1 146724927 146725102 176 146725027 17.00 9.25085 4.91915 6	.33859 E11.5_MANP_CHIP_G3BF_REP1_REP2_pooled_q0.01_peak_676
c	hr1 150392720 150393106 387 150392961 27.00 9.39668 3.71975 6	.48363 E11.5_MANP_CHIP_G3BF_REP1_REP2_pooled_q0.01_peak_677
c	hr1 150393315 150393837 523 150393641 18.00 6.42162 3.41164 3	.72916 E11.5_MANP_CHIP_G3BF_REP1_REP2_pooled_q0.01_peak_678
c	hr1 150743218 150743447 230 150743348 24.00 15.68020 6.83215	12.41189 E11.5_MANP_CHIP_G3BF_REP1_REP2_pooled_q0.01_peak_679
c	hr1 150993223 150993404 182 150993297 14.00 6.82220 4.09929 4	.07683 E11.5_MANP_CHIP_G3BF_REP1_REP2_pooled_q0.01_peak_680
c	hr1 151344466 151345239 774 151344625 32.00 21.36000 7.73977	17.86647 E11.5_MANP_CHIP_G3BF_REP1_REP2_pooled_q0.01_peak_681a
c	hr1 151344466 151345239 774 151345124 21.00 12.80816 6.01229	9.68985 E11.5_MANP_CHIP_G3BF_REP1_REP2_pooled_q0.01_peak_681b
c	hr1 151428052 151428493 442 151428170 16.00 5.19348 3.05252 2	.61892 E11.5_MANP_CHIP_G3BF_REP1_REP2_pooled_q0.01_peak_682a
c	hr1 151428052 151428493 442 151428364 24.00 15.68020 6.83215	12.41189 E11.5_MANP_CHIP_G3BF_REP1_REP2_pooled_q0.01_peak_682b
c	hr1 151428613 151429152 540 151428765 21.00 11.10059 5.15985	8.07674 E11.5_MANP_CHIP_G3BF_REP1_REP2_pooled_q0.01_peak_683a
c	hr1 151428613 151429152 540 151429057 19.00 10.98767 5.46572	7.97026 E11.5_MANP_CHIP_G3BF_REP1_REP2_pooled_q0.01_peak_683b
c	hr1 151500030 151500994 965 151500256 48.00 43.10269 13.39101	38.99024 E11.5_MANP_CHIP_G3BF_REP1_REP2_pooled_q0.01_peak_684a
c	hr1 151500030 151500994 965 151500478 37.00 29.70242 10.38487	25.92228 E11.5_MANP_CHIP_G3BF_REP1_REP2_pooled_q0.01_peak_684b
c	hr1 151603365 151603611 247 151603485 37.00 29.70242 10.38487	25.92228 E11.5_MANP_CHIP_G3BF_REP1_REP2_pooled_q0.01_peak_685
c	hr1 151755184 151755570 387 151755495 12.00 5.33746 3.55272 2	.71634 E11.5_MANP_CHIP_G3BF_REP1_REP2_pooled_q0.01_peak_686
c	hr1 152089603 152090304 702 152089946 27.00 16.46606 6.56708	13.18194 E11.5_MANP_CHIP_G3BF_REP1_REP2_pooled_q0.01_peak_687
c	hr1 152090412 152090624 213 152090521 19.00 10.98767 5.46572	7.97026 E11.5_MANP_CHIP_G3BF_REP1_REP2_pooled_q0.01_peak_688
c	hr1 152386295 152386725 431 152386417 16.00 8.41648 4.64586 5	.55904 E11.5_MANP_CHIP_G3BF_REP1_REP2_pooled_q0.01_peak_689a
c	hr1 152386295 152386725 431 152386654 15.00 5.42355 3.25439 2	.79831 E11.5_MANP_CHIP_G3BF_REP1_REP2_pooled_q0.01_peak_689b
c	hr1 152400226 152400475 250 152400315 16.00 6.06792 3.45779 3	.38153 E11.5_MANP_CHIP_G3BF_REP1_REP2_pooled_q0.01_peak_690
c	hr1 152575172 152575407 236 152575304 16.00 8.41648 4.64586 5	.55904 E11.5_MANP_CHIP_G3BF_REP1_REP2_pooled_q0.01_peak_691
c	hr1 152576589 152576919 331 152576720 32.00 24.04164 9.01844	20.43975 E11.5_MANP_CHIP_G3BF_REP1_REP2_pooled_q0.01_peak_692
c	hr1 152583138 152583598 461 152583233 24.00 14.78019 6.38123	11.55643 E11.5_MANP_CHIP_G3BF_REP1_REP2_pooled_q0.01_peak_693a
c	hr1 152583138 152583598 461 152583519 15.00 6.42739 3.75262 3	.72916 E11.5_MANP_CHIP_G3BF_REP1_REP2_pooled_q0.01_peak_693b
c	hr1 152624847 152625443 597 152624984 17.00 9.25085 4.91915 6	.33859 E11.5_MANP_CHIP_G3BF_REP1_REP2_pooled_q0.01_peak_694
c	hr1 152766574 152767067 494 152766738 19.00 10.98767 5.46572	7.97026 E11.5_MANP_CHIP_G3BF_REP1_REP2_pooled_q0.01_peak_695a
c	hr1 152766574 152767067 494 152766971 16.00 8.41648 4.64586 5	.55904 E11.5_MANP_CHIP_G3BF_REP1_REP2_pooled_q0.01_peak_695b
c	hr1 152901855 152902722 868 152902110 19.00 10.98767 5.46572	7.97026 E11.5_MANP_CHIP_G3BF_REP1_REP2_pooled_q0.01_peak_696a
c	hr1 152901855 152902722 868 152902333 20.00 11.88794 5.73901	8.81922 E11.5_MANP_CHIP_G3BF_REP1_REP2_pooled_q0.01_peak_696b
c	hr1 152901855 152902722 868 152902536 32.00 24.04164 9.01844	20.43975 E11.5_MANP_CHIP_G3BF_REP1_REP2_pooled_q0.01_peak_696c
c	hr1 152902905 152903232 328 152903032 23.00 14.70505 6.55886	11.48259 E11.5_MANP_CHIP_G3BF_REP1_REP2_pooled_q0.01_peak_697
c	hr1 152956237 152956554 318 152956392 29.00 16.27946 6.10199	13.00298 E11.5_MANP_CHIP_G3BF_REP1_REP2_pooled_q0.01_peak_698
c	hr1 153331971 153332938 968 153332123 17.00 9.25085 4.91915 6	.33859 E11.5_MANP_CHIP_G3BF_REP1_REP2_pooled_q0.01_peak_699a
c	hr1 153331971 153332938 968 153332751 33.00 14.79680 4.94571	11.57279 E11.5_MANP_CHIP_G3BF_REP1_REP2_pooled_q0.01_peak_699b
c	hr1 153486418 153486602 185 153486501 11.00 4.64076 3.27943 2	.08535 E11.5_MANP_CHIP_G3BF_REP1_REP2_pooled_q0.01_peak_700
c	hr1 153486684 153487770 1087 153486981 27.00 18.70449 7.65201	15.30417 E11.5_MANP_CHIP_G3BF_REP1_REP2_pooled_q0.01_peak_701a
c	hr1 153486684 153487770 1087 153487304 57.00 54.87074 15.8505	9 50.54016 E11.5_MANP_CHIP_G3BF_REP1_REP2_pooled_q0.01_peak_701b
c	hr1 153486684 153487770 1087 153487514 56.00 53.53170 15.5773	0 49.22254 E11.5_MANP_CHIP_G3BF_REP1_REP2_pooled_q0.01_peak_701c
c	hr1 153899386 153900970 1585 153899682 18.00 7.42758 3.86459	4.66513 E11.5_MANP_CHIP_G3BF_REP1_REP2_pooled_q0.01_peak_702a
c	hr1 153899386 153900970 1585 153900077 50.00 45.16072 13.6978	0 41.01437 E11.5_MANP_CHIP_G3BF_REP1_REP2_pooled_q0.01_peak_702b
c	hr1 153899386 153900970 1585 153900476 105.00 125.11191 28.46	995 120.07157 E11.5_MANP_CHIP_G3BF_REP1_REP2_pooled_q0.01_peak_702c
c	hr1 153901147 153901498 352 153901428 20.00 11.88794 5.73901	8.81922 E11.5_MANP_CHIP_G3BF_REP1_REP2_pooled_q0.01_peak_703
c	hr1 154788199 154788387 189 154788279 29.00 20.79730 8.19858	17.31392 E11.5_MANP_CHIP_G3BF_REP1_REP2_pooled_q0.01_peak_704
c	hr1 154995855 154996097 243 154996009 21.00 7.41601 3.53589 4	.65666 E11.5_MANP_CHIP_G3BF_REP1_REP2_pooled_q0.01_peak_705
c	hr1 155082936 155084225 1290 155083068 17.00 7.89603 4.22169	5.08356 E11.5_MANP_CHIP_G3BF_REP1_REP2_pooled_q0.01_peak_706a
c	hr1 155082936 155084225 1290 155083705 49.00 42.47234 12.7624	6 38.38061 E11.5_MANP_CHIP_G3BF_REP1_REP2_pooled_q0.01_peak_706b
c	hr1 155082936 155084225 1290 155084005 57.00 54.87074 15.8505	9 50.54016 E11.5_MANP_CHIP_G3BF_REP1_REP2_pooled_q0.01_peak_706c
c	hr1 155088917 155089226 310 155089076 27.00 16.46606 6.56708	13.18194 E11.5_MANP_CHIP_G3BF_REP1_REP2_pooled_q0.01_peak_707
c	hr1 155098478 155099192 715 155098584 27.00 18.70449 7.65201	15.30417 E11.5_MANP_CHIP_G3BF_REP1_REP2_pooled_q0.01_peak_708a
c	hr1 155098478 155099192 715 155098984 25.00 13.38670 5.53686	10.25364 E11.5_MANP_CHIP_G3BF_REP1_REP2_pooled_q0.01_peak_708b
c	hr1 155099342 155099819 478 155099570 30.00 18.18631 6.74126	14.82174 E11.5_MANP_CHIP_G3BF_REP1_REP2_pooled_q0.01_peak_709
c	hr1 155102534 155102693 160 155102608 20.00 11.88794 5.73901	8.81922 E11.5_MANP_CHIP_G3BF_REP1_REP2_pooled_q0.01_peak_710
c	hr1 155158683 155159290 608 155158868 20.00 11.88794 5.73901	8.81922 E11.5_MANP_CHIP_G3BF_REP1_REP2_pooled_q0.01_peak_711a
c	hr1 155158683 155159290 608 155159165 16.00 8.41648 4.64586 5	.55904 E11.5_MANP_CHIP_G3BF_REP1_REP2_pooled_q0.01_peak_711b
c	hr1 155211200 155211352 153 155211272 11.00 4.64076 3.27943 2	.08535 E11.5_MANP_CHIP_G3BF_REP1_REP2_pooled_q0.01_peak_712
c	hr1 155212289 155212894 606 155212650 140.00 161.36945 28.679	35 156.13574 E11.5_MANP_CHIP_G3BF_REP1_REP2_pooled_q0.01_peak_713
c	hr1 155229287 155229505 219 155229394 16.00 8.41648 4.64586 5	.55904 E11.5_MANP_CHIP_G3BF_REP1_REP2_pooled_q0.01_peak_714
c	hr1 155244150 155244907 758 155244266 23.00 12.18673 5.33181	9.10584 E11.5_MANP_CHIP_G3BF_REP1_REP2_pooled_q0.01_peak_715a
c	hr1 155244150 155244907 758 155244609 16.00 7.83645 4.33924 5	.03032 E11.5_MANP_CHIP_G3BF_REP1_REP2_pooled_q0.01_peak_715b
c	hr1 155416825 155417402 578 155416915 14.00 6.82220 4.09929 4	.07683 E11.5_MANP_CHIP_G3BF_REP1_REP2_pooled_q0.01_peak_716a
c	hr1 155416825 155417402 578 155417185 16.00 8.41648 4.64586 5	.55904 E11.5_MANP_CHIP_G3BF_REP1_REP2_pooled_q0.01_peak_716b
c	hr1 155416825 155417402 578 155417309 17.00 9.25085 4.91915 6	.33859 E11.5_MANP_CHIP_G3BF_REP1_REP2_pooled_q0.01_peak_716c
c	hr1 155557859 155558800 942 155558034 18.00 6.42162 3.41164 3	.72916 E11.5_MANP_CHIP_G3BF_REP1_REP2_pooled_q0.01_peak_717a
c	hr1 155557859 155558800 942 155558255 30.00 19.56354 7.36427	16.14960 E11.5_MANP_CHIP_G3BF_REP1_REP2_pooled_q0.01_peak_717b
c	hr1 155557859 155558800 942 155558579 24.00 9.41637 4.01806 6	.50269 E11.5_MANP_CHIP_G3BF_REP1_REP2_pooled_q0.01_peak_717c
c	hr1 155722281 155722508 228 155722391 23.00 14.70505 6.55886	11.48259 E11.5_MANP_CHIP_G3BF_REP1_REP2_pooled_q0.01_peak_718
c	hr1 155812980 155813189 210 155813087 18.00 6.42162 3.41164 3	.72916 E11.5_MANP_CHIP_G3BF_REP1_REP2_pooled_q0.01_peak_719
c	hr1 155972695 155973261 567 155973087 30.00 21.86518 8.47186	18.34202 E11.5_MANP_CHIP_G3BF_REP1_REP2_pooled_q0.01_peak_720
c	hr1 155973451 155973724 274 155973575 18.00 10.10829 5.19243	7.14298 E11.5_MANP_CHIP_G3BF_REP1_REP2_pooled_q0.01_peak_721
c	hr1 156035398 156036693 1296 156035619 30.00 21.86518 8.47186	18.34202 E11.5_MANP_CHIP_G3BF_REP1_REP2_pooled_q0.01_peak_722a
c	hr1 156035398 156036693 1296 156035838 26.00 17.68052 7.37872	14.32329 E11.5_MANP_CHIP_G3BF_REP1_REP2_pooled_q0.01_peak_722b
c	hr1 156035398 156036693 1296 156036024 16.00 7.14960 3.98715	4.39330 E11.5_MANP_CHIP_G3BF_REP1_REP2_pooled_q0.01_peak_722c
c	hr1 156035398 156036693 1296 156036315 35.00 19.74374 6.46416	16.30083 E11.5_MANP_CHIP_G3BF_REP1_REP2_pooled_q0.01_peak_722d
c	hr1 156040845 156041302 458 156041002 25.00 14.61092 6.09800	11.41868 E11.5_MANP_CHIP_G3BF_REP1_REP2_pooled_q0.01_peak_723
c	hr1 156473987 156474297 311 156474128 27.00 16.46606 6.56708	13.18194 E11.5_MANP_CHIP_G3BF_REP1_REP2_pooled_q0.01_peak_724
c	hr1 156558603 156559460 858 156558956 48.00 43.10269 13.39101	38.99024 E11.5_MANP_CHIP_G3BF_REP1_REP2_pooled_q0.01_peak_725a
c	hr1 156558603 156559460 858 156559338 18.00 9.93812 5.10310 7	.00789 E11.5_MANP_CHIP_G3BF_REP1_REP2_pooled_q0.01_peak_725b
c	hr1 156614307 156614513 207 156614428 17.00 5.79621 3.23208 3	.15738 E11.5_MANP_CHIP_G3BF_REP1_REP2_pooled_q0.01_peak_726
c	hr1 156718372 156718773 402 156718477 20.00 11.88794 5.73901	8.81922 E11.5_MANP_CHIP_G3BF_REP1_REP2_pooled_q0.01_peak_727a
c	hr1 156718372 156718773 402 156718659 22.00 13.74746 6.28558	10.57194 E11.5_MANP_CHIP_G3BF_REP1_REP2_pooled_q0.01_peak_727b
c	hr1 156752054 156752206 153 156752160 12.00 5.33746 3.55272 2	.71634 E11.5_MANP_CHIP_G3BF_REP1_REP2_pooled_q0.01_peak_728
c	hr1 156760961 156761215 255 156761055 12.00 5.22852 3.49160 2	.65192 E11.5_MANP_CHIP_G3BF_REP1_REP2_pooled_q0.01_peak_729
c	hr1 156843311 156843612 302 156843449 31.00 18.09393 6.50879	14.72956 E11.5_MANP_CHIP_G3BF_REP1_REP2_pooled_q0.01_peak_730
c	hr1 156938677 156939632 956 156938764 16.00 8.41648 4.64586 5	.55904 E11.5_MANP_CHIP_G3BF_REP1_REP2_pooled_q0.01_peak_731a
c	hr1 156938677 156939632 956 156939160 29.00 20.79730 8.19858	17.31392 E11.5_MANP_CHIP_G3BF_REP1_REP2_pooled_q0.01_peak_731b
c	hr1 156938677 156939632 956 156939511 20.00 11.88794 5.73901	8.81922 E11.5_MANP_CHIP_G3BF_REP1_REP2_pooled_q0.01_peak_731c
c	hr1 156939720 156940011 292 156939803 22.00 13.74746 6.28558	10.57194 E11.5_MANP_CHIP_G3BF_REP1_REP2_pooled_q0.01_peak_732
c	hr1 156964307 156964650 344 156964416 35.00 24.45441 8.44339	20.84498 E11.5_MANP_CHIP_G3BF_REP1_REP2_pooled_q0.01_peak_733
c	hr1 157048279 157048677 399 157048516 25.00 16.67223 7.10544	13.35840 E11.5_MANP_CHIP_G3BF_REP1_REP2_pooled_q0.01_peak_734
c	hr1 157412356 157412562 207 157412462 16.00 8.41648 4.64586 5	.55904 E11.5_MANP_CHIP_G3BF_REP1_REP2_pooled_q0.01_peak_735
c	hr1 158019299 158019468 170 158019383 19.00 8.14055 4.06799 5	.32214 E11.5_MANP_CHIP_G3BF_REP1_REP2_pooled_q0.01_peak_736
c	hr1 158362618 158362778 161 158362690 15.00 7.60646 4.37258 4	.80472 E11.5_MANP_CHIP_G3BF_REP1_REP2_pooled_q0.01_peak_737
c	hr1 158464180 158464380 201 158464284 18.00 10.10829 5.19243	7.14298 E11.5_MANP_CHIP_G3BF_REP1_REP2_pooled_q0.01_peak_738
c	hr1 158860317 158860589 273 158860446 36.00 28.54655 10.11158	24.80025 E11.5_MANP_CHIP_G3BF_REP1_REP2_pooled_q0.01_peak_739
c	hr1 159232223 159233092 870 159232359 41.00 33.42960 10.99338	29.54510 E11.5_MANP_CHIP_G3BF_REP1_REP2_pooled_q0.01_peak_740a
c	hr1 159232223 159233092 870 159232877 26.00 17.68052 7.37872	14.32329 E11.5_MANP_CHIP_G3BF_REP1_REP2_pooled_q0.01_peak_740b
c	hr1 160195274 160195483 210 160195374 19.00 10.98767 5.46572	7.97026 E11.5_MANP_CHIP_G3BF_REP1_REP2_pooled_q0.01_peak_741
c	hr1 160212265 160212831 567 160212513 18.00 8.66541 4.45623 5	.79866 E11.5_MANP_CHIP_G3BF_REP1_REP2_pooled_q0.01_peak_742a
c	hr1 160212265 160212831 567 160212725 26.00 17.68052 7.37872	14.32329 E11.5_MANP_CHIP_G3BF_REP1_REP2_pooled_q0.01_peak_742b
c	hr1 160213080 160213415 336 160213266 22.00 12.92761 5.87073	9.79838 E11.5_MANP_CHIP_G3BF_REP1_REP2_pooled_q0.01_peak_743
c	hr1 160224155 160224340 186 160224276 22.00 11.95153 5.39439	8.87686 E11.5_MANP_CHIP_G3BF_REP1_REP2_pooled_q0.01_peak_744
c	hr1 160792185 160792922 738 160792257 14.00 6.82220 4.09929 4	.07683 E11.5_MANP_CHIP_G3BF_REP1_REP2_pooled_q0.01_peak_745a
c	hr1 160792185 160792922 738 160792486 16.00 7.83645 4.33924 5	.03032 E11.5_MANP_CHIP_G3BF_REP1_REP2_pooled_q0.01_peak_745b
c	hr1 160792185 160792922 738 160792720 28.00 12.31489 4.66095	9.23197 E11.5_MANP_CHIP_G3BF_REP1_REP2_pooled_q0.01_peak_745c
c	hr1 160906373 160907129 757 160906561 52.00 43.79469 12.43054	39.67470 E11.5_MANP_CHIP_G3BF_REP1_REP2_pooled_q0.01_peak_746a
c	hr1 160906373 160907129 757 160906771 51.00 42.58360 12.19600	38.48883 E11.5_MANP_CHIP_G3BF_REP1_REP2_pooled_q0.01_peak_746b
c	hr1 161034315 161034935 621 161034503 16.00 8.41648 4.64586 5	.55904 E11.5_MANP_CHIP_G3BF_REP1_REP2_pooled_q0.01_peak_747a
c	hr1 161034315 161034935 621 161034791 26.00 15.53067 6.33254	12.29179 E11.5_MANP_CHIP_G3BF_REP1_REP2_pooled_q0.01_peak_747b
c	hr1 161035094 161035960 867 161035262 45.00 32.13079 9.35638	28.27850 E11.5_MANP_CHIP_G3BF_REP1_REP2_pooled_q0.01_peak_748a
c	hr1 161035094 161035960 867 161035490 31.00 22.94677 8.74515	19.38261 E11.5_MANP_CHIP_G3BF_REP1_REP2_pooled_q0.01_peak_748b
c	hr1 161035094 161035960 867 161035721 21.00 12.80816 6.01229	9.68985 E11.5_MANP_CHIP_G3BF_REP1_REP2_pooled_q0.01_peak_748c
c	hr1 161070433 161070697 265 161070562 16.00 8.41648 4.64586 5	.55904 E11.5_MANP_CHIP_G3BF_REP1_REP2_pooled_q0.01_peak_749
c	hr1 161070789 161070943 155 161070877 14.00 6.82220 4.09929 4	.07683 E11.5_MANP_CHIP_G3BF_REP1_REP2_pooled_q0.01_peak_750
c	hr1 161131224 161131619 396 161131297 15.00 7.60646 4.37258 4	.80472 E11.5_MANP_CHIP_G3BF_REP1_REP2_pooled_q0.01_peak_751a
c	hr1 161131224 161131619 396 161131545 20.00 8.87424 4.27139 6	.00180 E11.5_MANP_CHIP_G3BF_REP1_REP2_pooled_q0.01_peak_751b
c	hr1 161142656 161142910 255 161142687 12.00 5.33746 3.55272 2	.71634 E11.5_MANP_CHIP_G3BF_REP1_REP2_pooled_q0.01_peak_752
c	hr1 161250078 161250358 281 161250190 16.00 8.41648 4.64586 5	.55904 E11.5_MANP_CHIP_G3BF_REP1_REP2_pooled_q0.01_peak_753
c	hr1 161250846 161251147 302 161251055 22.00 13.74746 6.28558	10.57194 E11.5_MANP_CHIP_G3BF_REP1_REP2_pooled_q0.01_peak_754
c	hr1 161876065 161876770 706 161876416 20.00 7.73626 3.77076 4	.93182 E11.5_MANP_CHIP_G3BF_REP1_REP2_pooled_q0.01_peak_755a
c	hr1 161876065 161876770 706 161876608 25.00 16.67223 7.10544	13.35840 E11.5_MANP_CHIP_G3BF_REP1_REP2_pooled_q0.01_peak_755b
c	hr1 161968961 161969242 282 161969115 34.00 25.93491 9.40045	22.28432 E11.5_MANP_CHIP_G3BF_REP1_REP2_pooled_q0.01_peak_756
c	hr1 161984121 161984309 189 161984205 23.00 13.54371 5.97759	10.40821 E11.5_MANP_CHIP_G3BF_REP1_REP2_pooled_q0.01_peak_757
c	hr1 162008731 162008904 174 162008816 14.00 6.82220 4.09929 4	.07683 E11.5_MANP_CHIP_G3BF_REP1_REP2_pooled_q0.01_peak_758
c	hr1 162024066 162024223 158 162024152 18.00 10.10829 5.19243	7.14298 E11.5_MANP_CHIP_G3BF_REP1_REP2_pooled_q0.01_peak_759
c	hr1 162074750 162074904 155 162074851 18.00 8.66541 4.45623 5	.79866 E11.5_MANP_CHIP_G3BF_REP1_REP2_pooled_q0.01_peak_760
c	hr1 162186751 162186973 223 162186851 26.00 17.42814 7.25178	14.09954 E11.5_MANP_CHIP_G3BF_REP1_REP2_pooled_q0.01_peak_761
c	hr1 162217675 162221219 3545 162217841 35.00 27.05709 9.66904	23.37041 E11.5_MANP_CHIP_G3BF_REP1_REP2_pooled_q0.01_peak_762a
c	hr1 162217675 162221219 3545 162218172 31.00 22.94677 8.74515	19.38261 E11.5_MANP_CHIP_G3BF_REP1_REP2_pooled_q0.01_peak_762b
c	hr1 162217675 162221219 3545 162218406 27.00 18.70449 7.65201	15.30417 E11.5_MANP_CHIP_G3BF_REP1_REP2_pooled_q0.01_peak_762c
c	hr1 162217675 162221219 3545 162218676 37.00 29.70242 10.3848	7 25.92228 E11.5_MANP_CHIP_G3BF_REP1_REP2_pooled_q0.01_peak_762d
c	hr1 162217675 162221219 3545 162219029 29.00 20.79730 8.19858	17.31392 E11.5_MANP_CHIP_G3BF_REP1_REP2_pooled_q0.01_peak_762e
c	hr1 162217675 162221219 3545 162219404 24.00 15.68020 6.83215	12.41189 E11.5_MANP_CHIP_G3BF_REP1_REP2_pooled_q0.01_peak_762f
c	hr1 162217675 162221219 3545 162219677 20.00 11.88794 5.73901	8.81922 E11.5_MANP_CHIP_G3BF_REP1_REP2_pooled_q0.01_peak_762g
c	hr1 162217675 162221219 3545 162220045 23.00 14.70505 6.55886	11.48259 E11.5_MANP_CHIP_G3BF_REP1_REP2_pooled_q0.01_peak_762h
c	hr1 162217675 162221219 3545 162220198 20.00 11.88794 5.73901	8.81922 E11.5_MANP_CHIP_G3BF_REP1_REP2_pooled_q0.01_peak_762i
c	hr1 162217675 162221219 3545 162220557 28.00 19.74358 7.92529	16.30083 E11.5_MANP_CHIP_G3BF_REP1_REP2_pooled_q0.01_peak_762j
c	hr1 162217675 162221219 3545 162220790 62.00 61.67465 17.2170	2 57.24139 E11.5_MANP_CHIP_G3BF_REP1_REP2_pooled_q0.01_peak_762k
c	hr1 162221653 162222183 531 162221733 20.00 11.88794 5.73901	8.81922 E11.5_MANP_CHIP_G3BF_REP1_REP2_pooled_q0.01_peak_763a
c	hr1 162221653 162222183 531 162221975 14.00 6.82220 4.09929 4	.07683 E11.5_MANP_CHIP_G3BF_REP1_REP2_pooled_q0.01_peak_763b
c	hr1 162223071 162223287 217 162223180 13.00 6.06527 3.82600 3	.38153 E11.5_MANP_CHIP_G3BF_REP1_REP2_pooled_q0.01_peak_764
c	hr1 162224732 162225316 585 162224848 14.00 6.82220 4.09929 4	.07683 E11.5_MANP_CHIP_G3BF_REP1_REP2_pooled_q0.01_peak_765a
c	hr1 162224732 162225316 585 162225013 18.00 10.10829 5.19243	7.14298 E11.5_MANP_CHIP_G3BF_REP1_REP2_pooled_q0.01_peak_765b
c	hr1 162225480 162225955 476 162225704 35.00 27.40221 9.83829	23.69099 E11.5_MANP_CHIP_G3BF_REP1_REP2_pooled_q0.01_peak_766
c	hr1 162226046 162226201 156 162226120 17.00 8.85629 4.71145 5	.98691 E11.5_MANP_CHIP_G3BF_REP1_REP2_pooled_q0.01_peak_767
c	hr1 162530748 162530913 166 162530830 17.00 9.25085 4.91915 6	.33859 E11.5_MANP_CHIP_G3BF_REP1_REP2_pooled_q0.01_peak_768
c	hr1 162570497 162571148 652 162570623 19.00 10.98767 5.46572	7.97026 E11.5_MANP_CHIP_G3BF_REP1_REP2_pooled_q0.01_peak_769a
c	hr1 162570497 162571148 652 162571017 24.00 15.68020 6.83215	12.41189 E11.5_MANP_CHIP_G3BF_REP1_REP2_pooled_q0.01_peak_769b
c	hr1 162739875 162740551 677 162740050 29.00 18.38166 7.03616	15.01118 E11.5_MANP_CHIP_G3BF_REP1_REP2_pooled_q0.01_peak_770a
c	hr1 162739875 162740551 677 162740389 38.00 30.86952 10.65815	27.05543 E11.5_MANP_CHIP_G3BF_REP1_REP2_pooled_q0.01_peak_770b
c	hr1 162740657 162740849 193 162740720 14.00 6.82220 4.09929 4	.07683 E11.5_MANP_CHIP_G3BF_REP1_REP2_pooled_q0.01_peak_771
c	hr1 163301559 163301734 176 163301635 23.00 14.48354 6.44603	11.30065 E11.5_MANP_CHIP_G3BF_REP1_REP2_pooled_q0.01_peak_772
c	hr1 163310203 163310899 697 163310422 16.00 8.41648 4.64586 5	.55904 E11.5_MANP_CHIP_G3BF_REP1_REP2_pooled_q0.01_peak_773a
c	hr1 163310203 163310899 697 163310652 17.00 6.73634 3.66119 4	.03008 E11.5_MANP_CHIP_G3BF_REP1_REP2_pooled_q0.01_peak_773b
c	hr1 163310976 163312988 2013 163311243 18.00 10.10829 5.19243	7.14298 E11.5_MANP_CHIP_G3BF_REP1_REP2_pooled_q0.01_peak_774a
c	hr1 163310976 163312988 2013 163311525 23.00 14.70505 6.55886	11.48259 E11.5_MANP_CHIP_G3BF_REP1_REP2_pooled_q0.01_peak_774b
c	hr1 163310976 163312988 2013 163311723 29.00 20.79730 8.19858	17.31392 E11.5_MANP_CHIP_G3BF_REP1_REP2_pooled_q0.01_peak_774c
c	hr1 163310976 163312988 2013 163312023 37.00 29.70242 10.3848	7 25.92228 E11.5_MANP_CHIP_G3BF_REP1_REP2_pooled_q0.01_peak_774d
c	hr1 163310976 163312988 2013 163312369 40.00 29.84470 9.61608	26.06034 E11.5_MANP_CHIP_G3BF_REP1_REP2_pooled_q0.01_peak_774e
c	hr1 163313091 163313744 654 163313176 17.00 9.09092 4.83452 6	.21578 E11.5_MANP_CHIP_G3BF_REP1_REP2_pooled_q0.01_peak_775a
c	hr1 163313091 163313744 654 163313599 30.00 19.36089 7.27069	15.94879 E11.5_MANP_CHIP_G3BF_REP1_REP2_pooled_q0.01_peak_775b
c	hr1 163314065 163314294 230 163314126 11.00 4.64076 3.27943 2	.08535 E11.5_MANP_CHIP_G3BF_REP1_REP2_pooled_q0.01_peak_776
c	hr1 163314653 163315405 753 163315193 53.00 49.56038 14.75744	45.31981 E11.5_MANP_CHIP_G3BF_REP1_REP2_pooled_q0.01_peak_777
c	hr1 163355749 163356089 341 163355985 18.00 10.10829 5.19243	7.14298 E11.5_MANP_CHIP_G3BF_REP1_REP2_pooled_q0.01_peak_778
c	hr1 163358075 163358587 513 163358209 22.00 11.95153 5.39439	8.87686 E11.5_MANP_CHIP_G3BF_REP1_REP2_pooled_q0.01_peak_779a
c	hr1 163358075 163358587 513 163358410 15.00 7.46699 4.29735 4	.70223 E11.5_MANP_CHIP_G3BF_REP1_REP2_pooled_q0.01_peak_779b
c	hr1 163377932 163378107 176 163378003 13.00 5.06128 3.28354 2	.49038 E11.5_MANP_CHIP_G3BF_REP1_REP2_pooled_q0.01_peak_780
c	hr1 163403785 163404062 278 163403854 14.00 6.82220 4.09929 4	.07683 E11.5_MANP_CHIP_G3BF_REP1_REP2_pooled_q0.01_peak_781
c	hr1 163571022 163571205 184 163571104 14.00 6.82220 4.09929 4	.07683 E11.5_MANP_CHIP_G3BF_REP1_REP2_pooled_q0.01_peak_782
c	hr1 163609988 163610266 279 163610104 40.00 33.23634 11.20473	29.35288 E11.5_MANP_CHIP_G3BF_REP1_REP2_pooled_q0.01_peak_783
c	hr1 163669931 163670151 221 163670024 13.00 6.06527 3.82600 3	.38153 E11.5_MANP_CHIP_G3BF_REP1_REP2_pooled_q0.01_peak_784
c	hr1 163929741 163930499 759 163930031 33.00 25.14942 9.29172	21.51036 E11.5_MANP_CHIP_G3BF_REP1_REP2_pooled_q0.01_peak_785a
c	hr1 163929741 163930499 759 163930263 26.00 17.68052 7.37872	14.32329 E11.5_MANP_CHIP_G3BF_REP1_REP2_pooled_q0.01_peak_785b
c	hr1 163994570 163994948 379 163994706 17.00 9.09092 4.83452 6	.21578 E11.5_MANP_CHIP_G3BF_REP1_REP2_pooled_q0.01_peak_786
c	hr1 165236545 165236869 325 165236759 22.00 13.74746 6.28558	10.57194 E11.5_MANP_CHIP_G3BF_REP1_REP2_pooled_q0.01_peak_787
c	hr1 165281513 165282251 739 165281595 15.00 7.60646 4.37258 4	.80472 E11.5_MANP_CHIP_G3BF_REP1_REP2_pooled_q0.01_peak_788a
c	hr1 165281513 165282251 739 165281934 39.00 32.04759 10.93144	28.20100 E11.5_MANP_CHIP_G3BF_REP1_REP2_pooled_q0.01_peak_788b
c	hr1 165282344 165282643 300 165282413 14.00 6.82220 4.09929 4	.07683 E11.5_MANP_CHIP_G3BF_REP1_REP2_pooled_q0.01_peak_789
c	hr1 165344586 165344734 149 165344648 13.00 6.06527 3.82600 3	.38153 E11.5_MANP_CHIP_G3BF_REP1_REP2_pooled_q0.01_peak_790
c	hr1 165459974 165461553 1580 165460319 20.00 8.87424 4.27139	6.00180 E11.5_MANP_CHIP_G3BF_REP1_REP2_pooled_q0.01_peak_791a
c	hr1 165459974 165461553 1580 165460586 17.00 9.25085 4.91915	6.33859 E11.5_MANP_CHIP_G3BF_REP1_REP2_pooled_q0.01_peak_791b
c	hr1 165459974 165461553 1580 165460694 17.00 9.25085 4.91915	6.33859 E11.5_MANP_CHIP_G3BF_REP1_REP2_pooled_q0.01_peak_791c
c	hr1 165459974 165461553 1580 165460856 18.00 10.10829 5.19243	7.14298 E11.5_MANP_CHIP_G3BF_REP1_REP2_pooled_q0.01_peak_791d
c	hr1 165459974 165461553 1580 165461382 15.00 7.60646 4.37258	4.80472 E11.5_MANP_CHIP_G3BF_REP1_REP2_pooled_q0.01_peak_791e
c	hr1 165633856 165634925 1070 165634005 22.00 10.40017 4.67819	7.42281 E11.5_MANP_CHIP_G3BF_REP1_REP2_pooled_q0.01_peak_792a
c	hr1 165633856 165634925 1070 165634420 35.00 24.45441 8.44339	20.84498 E11.5_MANP_CHIP_G3BF_REP1_REP2_pooled_q0.01_peak_792b
c	hr1 165633856 165634925 1070 165634823 16.00 8.41648 4.64586	5.55904 E11.5_MANP_CHIP_G3BF_REP1_REP2_pooled_q0.01_peak_792c
c	hr1 165641509 165641922 414 165641620 21.00 12.80816 6.01229	9.68985 E11.5_MANP_CHIP_G3BF_REP1_REP2_pooled_q0.01_peak_793
c	hr1 165641996 165643254 1259 165642177 18.00 10.10829 5.19243	7.14298 E11.5_MANP_CHIP_G3BF_REP1_REP2_pooled_q0.01_peak_794a
c	hr1 165641996 165643254 1259 165642517 29.00 20.79730 8.19858	17.31392 E11.5_MANP_CHIP_G3BF_REP1_REP2_pooled_q0.01_peak_794b
c	hr1 165641996 165643254 1259 165642762 24.00 15.68020 6.83215	12.41189 E11.5_MANP_CHIP_G3BF_REP1_REP2_pooled_q0.01_peak_794c
c	hr1 165641996 165643254 1259 165643134 25.00 16.67223 7.10544	13.35840 E11.5_MANP_CHIP_G3BF_REP1_REP2_pooled_q0.01_peak_794d
c	hr1 165658717 165658865 149 165658827 13.00 6.06527 3.82600 3	.38153 E11.5_MANP_CHIP_G3BF_REP1_REP2_pooled_q0.01_peak_795
c	hr1 166001387 166002743 1357 166001658 20.00 7.73626 3.77076	4.93182 E11.5_MANP_CHIP_G3BF_REP1_REP2_pooled_q0.01_peak_796a
c	hr1 166001387 166002743 1357 166001826 23.00 14.70505 6.55886	11.48259 E11.5_MANP_CHIP_G3BF_REP1_REP2_pooled_q0.01_peak_796b
c	hr1 166001387 166002743 1357 166002231 26.00 17.68052 7.37872	14.32329 E11.5_MANP_CHIP_G3BF_REP1_REP2_pooled_q0.01_peak_796c
c	hr1 166001387 166002743 1357 166002511 28.00 17.41656 6.80162	14.08928 E11.5_MANP_CHIP_G3BF_REP1_REP2_pooled_q0.01_peak_796d
c	hr1 166003111 166003411 301 166003168 16.00 8.04724 4.44970 5	.23277 E11.5_MANP_CHIP_G3BF_REP1_REP2_pooled_q0.01_peak_797
c	hr1 166378854 166379131 278 166379030 19.00 10.98767 5.46572	7.97026 E11.5_MANP_CHIP_G3BF_REP1_REP2_pooled_q0.01_peak_798
c	hr1 166379306 166380141 836 166379426 34.00 26.26973 9.56501	22.59474 E11.5_MANP_CHIP_G3BF_REP1_REP2_pooled_q0.01_peak_799a
c	hr1 166379306 166380141 836 166379843 18.00 10.10829 5.19243	7.14298 E11.5_MANP_CHIP_G3BF_REP1_REP2_pooled_q0.01_peak_799b
c	hr1 166409105 166409279 175 166409159 13.00 6.06527 3.82600 3	.38153 E11.5_MANP_CHIP_G3BF_REP1_REP2_pooled_q0.01_peak_800
c	hr1 166409356 166409850 495 166409520 13.00 6.06527 3.82600 3	.38153 E11.5_MANP_CHIP_G3BF_REP1_REP2_pooled_q0.01_peak_801a
c	hr1 166409356 166409850 495 166409709 21.00 12.80816 6.01229	9.68985 E11.5_MANP_CHIP_G3BF_REP1_REP2_pooled_q0.01_peak_801b
c	hr1 166964594 166964775 182 166964677 23.00 14.70505 6.55886	11.48259 E11.5_MANP_CHIP_G3BF_REP1_REP2_pooled_q0.01_peak_802
c	hr1 167079585 167079802 218 167079692 19.00 7.06863 3.59120 4	.31928 E11.5_MANP_CHIP_G3BF_REP1_REP2_pooled_q0.01_peak_803
c	hr1 167187889 167188104 216 167187999 19.00 10.98767 5.46572	7.97026 E11.5_MANP_CHIP_G3BF_REP1_REP2_pooled_q0.01_peak_804
c	hr1 167283745 167285369 1625 167284127 23.00 12.82070 5.62892	9.69682 E11.5_MANP_CHIP_G3BF_REP1_REP2_pooled_q0.01_peak_805a
c	hr1 167283745 167285369 1625 167284521 22.00 13.53623 6.17744	10.40137 E11.5_MANP_CHIP_G3BF_REP1_REP2_pooled_q0.01_peak_805b
c	hr1 167283745 167285369 1625 167284807 25.00 14.61092 6.09800	11.41868 E11.5_MANP_CHIP_G3BF_REP1_REP2_pooled_q0.01_peak_805c
c	hr1 167283745 167285369 1625 167285063 23.00 14.70505 6.55886	11.48259 E11.5_MANP_CHIP_G3BF_REP1_REP2_pooled_q0.01_peak_805d
c	hr1 167308160 167308929 770 167308458 26.00 10.83456 4.33951	7.85048 E11.5_MANP_CHIP_G3BF_REP1_REP2_pooled_q0.01_peak_806a
c	hr1 167308160 167308929 770 167308842 15.00 7.06624 4.08399 4	.31840 E11.5_MANP_CHIP_G3BF_REP1_REP2_pooled_q0.01_peak_806b
c	hr1 167350061 167350458 398 167350249 19.00 10.98767 5.46572	7.97026 E11.5_MANP_CHIP_G3BF_REP1_REP2_pooled_q0.01_peak_807
c	hr1 167394217 167394402 186 167394302 15.00 7.60646 4.37258 4	.80472 E11.5_MANP_CHIP_G3BF_REP1_REP2_pooled_q0.01_peak_808
c	hr1 168214099 168214385 287 168214343 14.00 6.82220 4.09929 4	.07683 E11.5_MANP_CHIP_G3BF_REP1_REP2_pooled_q0.01_peak_809
c	hr1 168384203 168384460 258 168384309 15.00 7.60646 4.37258 4	.80472 E11.5_MANP_CHIP_G3BF_REP1_REP2_pooled_q0.01_peak_810
c	hr1 168385541 168385769 229 168385659 20.00 11.88794 5.73901	8.81922 E11.5_MANP_CHIP_G3BF_REP1_REP2_pooled_q0.01_peak_811
c	hr1 168431050 168431697 648 168431168 15.00 7.60646 4.37258 4	.80472 E11.5_MANP_CHIP_G3BF_REP1_REP2_pooled_q0.01_peak_812a
c	hr1 168431050 168431697 648 168431478 23.00 12.82070 5.62892	9.69682 E11.5_MANP_CHIP_G3BF_REP1_REP2_pooled_q0.01_peak_812b
c	hr1 168431784 168432136 353 168431874 15.00 7.60646 4.37258 4	.80472 E11.5_MANP_CHIP_G3BF_REP1_REP2_pooled_q0.01_peak_813a
c	hr1 168431784 168432136 353 168432035 14.00 6.82220 4.09929 4	.07683 E11.5_MANP_CHIP_G3BF_REP1_REP2_pooled_q0.01_peak_813b
c	hr1 168732820 168733286 467 168733119 43.00 36.86421 12.02458	32.89013 E11.5_MANP_CHIP_G3BF_REP1_REP2_pooled_q0.01_peak_814
c	hr1 168754271 168754607 337 168754502 22.00 13.74746 6.28558	10.57194 E11.5_MANP_CHIP_G3BF_REP1_REP2_pooled_q0.01_peak_815
c	hr1 168791997 168792485 489 168792103 27.00 11.56723 4.50023	8.53386 E11.5_MANP_CHIP_G3BF_REP1_REP2_pooled_q0.01_peak_816
c	hr1 169357918 169358080 163 169357992 20.00 11.88794 5.73901	8.81922 E11.5_MANP_CHIP_G3BF_REP1_REP2_pooled_q0.01_peak_817
c	hr1 169531188 169531650 463 169531506 27.00 18.70449 7.65201	15.30417 E11.5_MANP_CHIP_G3BF_REP1_REP2_pooled_q0.01_peak_818
c	hr1 169719731 169719889 159 169719864 16.00 8.41648 4.64586 5	.55904 E11.5_MANP_CHIP_G3BF_REP1_REP2_pooled_q0.01_peak_819
c	hr1 169851775 169851953 179 169851860 15.00 7.60646 4.37258 4	.80472 E11.5_MANP_CHIP_G3BF_REP1_REP2_pooled_q0.01_peak_820
c	hr1 169969515 169969782 268 169969586 15.00 7.60646 4.37258 4	.80472 E11.5_MANP_CHIP_G3BF_REP1_REP2_pooled_q0.01_peak_821
c	hr1 170037391 170037555 165 170037461 14.00 6.82220 4.09929 4	.07683 E11.5_MANP_CHIP_G3BF_REP1_REP2_pooled_q0.01_peak_822
c	hr1 170109871 170110035 165 170109959 13.00 6.06527 3.82600 3	.38153 E11.5_MANP_CHIP_G3BF_REP1_REP2_pooled_q0.01_peak_823
c	hr1 170110178 170110430 253 170110315 15.00 6.42739 3.75262 3	.72916 E11.5_MANP_CHIP_G3BF_REP1_REP2_pooled_q0.01_peak_824
c	hr1 170110553 170110809 257 170110702 15.00 7.60646 4.37258 4	.80472 E11.5_MANP_CHIP_G3BF_REP1_REP2_pooled_q0.01_peak_825
c	hr1 170174581 170174827 247 170174726 21.00 9.62773 4.47479 6	.70316 E11.5_MANP_CHIP_G3BF_REP1_REP2_pooled_q0.01_peak_826
c	hr1 170175094 170175372 279 170175249 16.00 7.14960 3.98715 4	.39330 E11.5_MANP_CHIP_G3BF_REP1_REP2_pooled_q0.01_peak_827
c	hr1 170214773 170215408 636 170215284 33.00 12.38103 4.15642	9.29746 E11.5_MANP_CHIP_G3BF_REP1_REP2_pooled_q0.01_peak_828
c	hr1 170255348 170255792 445 170255443 21.00 12.80816 6.01229	9.68985 E11.5_MANP_CHIP_G3BF_REP1_REP2_pooled_q0.01_peak_829a
c	hr1 170255348 170255792 445 170255669 31.00 22.94677 8.74515	19.38261 E11.5_MANP_CHIP_G3BF_REP1_REP2_pooled_q0.01_peak_829b
c	hr1 170438928 170439099 172 170439020 16.00 8.41648 4.64586 5	.55904 E11.5_MANP_CHIP_G3BF_REP1_REP2_pooled_q0.01_peak_830
c	hr1 170644445 170644682 238 170644590 11.00 4.64076 3.27943 2	.08535 E11.5_MANP_CHIP_G3BF_REP1_REP2_pooled_q0.01_peak_831
c	hr1 170884853 170885019 167 170884951 16.00 8.41648 4.64586 5	.55904 E11.5_MANP_CHIP_G3BF_REP1_REP2_pooled_q0.01_peak_832
c	hr1 170885168 170885368 201 170885260 17.00 9.25085 4.91915 6	.33859 E11.5_MANP_CHIP_G3BF_REP1_REP2_pooled_q0.01_peak_833
c	hr1 171033853 171034098 246 171033977 33.00 22.37907 7.97431	18.84602 E11.5_MANP_CHIP_G3BF_REP1_REP2_pooled_q0.01_peak_834
c	hr1 171036970 171037183 214 171037099 17.00 9.25085 4.91915 6	.33859 E11.5_MANP_CHIP_G3BF_REP1_REP2_pooled_q0.01_peak_835
c	hr1 171037902 171038305 404 171038129 20.00 10.26867 4.92531	7.29611 E11.5_MANP_CHIP_G3BF_REP1_REP2_pooled_q0.01_peak_836
c	hr1 171038561 171038712 152 171038672 18.00 10.10829 5.19243	7.14298 E11.5_MANP_CHIP_G3BF_REP1_REP2_pooled_q0.01_peak_837
c	hr1 171044554 171045087 534 171044913 23.00 14.70505 6.55886	11.48259 E11.5_MANP_CHIP_G3BF_REP1_REP2_pooled_q0.01_peak_838
c	hr1 171063693 171065838 2146 171064195 65.00 39.94216 8.24734	35.90678 E11.5_MANP_CHIP_G3BF_REP1_REP2_pooled_q0.01_peak_839a
c	hr1 171063693 171065838 2146 171064732 60.00 34.54640 7.45710	30.63157 E11.5_MANP_CHIP_G3BF_REP1_REP2_pooled_q0.01_peak_839b
c	hr1 171063693 171065838 2146 171065350 74.00 53.94176 10.8182	4 49.62997 E11.5_MANP_CHIP_G3BF_REP1_REP2_pooled_q0.01_peak_839c
c	hr1 171066009 171066351 343 171066196 25.00 8.97096 3.75032 6	.09817 E11.5_MANP_CHIP_G3BF_REP1_REP2_pooled_q0.01_peak_840
c	hr1 171066614 171066832 219 171066705 24.00 7.53314 3.32121 4	.76816 E11.5_MANP_CHIP_G3BF_REP1_REP2_pooled_q0.01_peak_841
c	hr1 171069955 171070139 185 171069987 24.00 6.74884 3.04986 4	.04256 E11.5_MANP_CHIP_G3BF_REP1_REP2_pooled_q0.01_peak_842
c	hr1 171070390 171070816 427 171070450 21.00 5.72893 2.88959 3	.09497 E11.5_MANP_CHIP_G3BF_REP1_REP2_pooled_q0.01_peak_843a
c	hr1 171070390 171070816 427 171070690 29.00 6.78882 2.78008 4	.07683 E11.5_MANP_CHIP_G3BF_REP1_REP2_pooled_q0.01_peak_843b
c	hr1 171071483 171073842 2360 171071535 19.00 5.59903 2.98105	2.97170 E11.5_MANP_CHIP_G3BF_REP1_REP2_pooled_q0.01_peak_844a
c	hr1 171071483 171073842 2360 171071851 58.00 37.51071 8.65607	33.53431 E11.5_MANP_CHIP_G3BF_REP1_REP2_pooled_q0.01_peak_844b
c	hr1 171071483 171073842 2360 171072431 48.00 19.58310 4.83314	16.16913 E11.5_MANP_CHIP_G3BF_REP1_REP2_pooled_q0.01_peak_844c
c	hr1 171071483 171073842 2360 171072754 31.00 12.10737 4.25742	9.02798 E11.5_MANP_CHIP_G3BF_REP1_REP2_pooled_q0.01_peak_844d
c	hr1 171071483 171073842 2360 171073069 48.00 19.58310 4.83314	16.16913 E11.5_MANP_CHIP_G3BF_REP1_REP2_pooled_q0.01_peak_844e
c	hr1 171071483 171073842 2360 171073463 26.00 9.49786 3.84601	6.57705 E11.5_MANP_CHIP_G3BF_REP1_REP2_pooled_q0.01_peak_844f
c	hr1 171074056 171074482 427 171074143 27.00 10.55316 4.12562	7.57386 E11.5_MANP_CHIP_G3BF_REP1_REP2_pooled_q0.01_peak_845a
c	hr1 171074056 171074482 427 171074367 29.00 12.24632 4.51742	9.16531 E11.5_MANP_CHIP_G3BF_REP1_REP2_pooled_q0.01_peak_845b
c	hr1 171078055 171078442 388 171078276 33.00 6.49092 2.53693 3	.79258 E11.5_MANP_CHIP_G3BF_REP1_REP2_pooled_q0.01_peak_846
c	hr1 171079097 171080892 1796 171079228 35.00 17.29574 5.55931	13.97399 E11.5_MANP_CHIP_G3BF_REP1_REP2_pooled_q0.01_peak_847a
c	hr1 171079097 171080892 1796 171079484 63.00 44.00334 9.82419	39.88243 E11.5_MANP_CHIP_G3BF_REP1_REP2_pooled_q0.01_peak_847b
c	hr1 171079097 171080892 1796 171079814 26.00 10.48504 4.20740	7.50726 E11.5_MANP_CHIP_G3BF_REP1_REP2_pooled_q0.01_peak_847c
c	hr1 171079097 171080892 1796 171080071 58.00 34.85729 7.83805	30.94036 E11.5_MANP_CHIP_G3BF_REP1_REP2_pooled_q0.01_peak_847d
c	hr1 171079097 171080892 1796 171080697 49.00 23.23977 5.69434	19.67394 E11.5_MANP_CHIP_G3BF_REP1_REP2_pooled_q0.01_peak_847e
c	hr1 171081299 171082076 778 171081445 26.00 8.75988 3.58690 5	.89221 E11.5_MANP_CHIP_G3BF_REP1_REP2_pooled_q0.01_peak_848a
c	hr1 171081299 171082076 778 171081735 28.00 12.99904 4.92186	9.86940 E11.5_MANP_CHIP_G3BF_REP1_REP2_pooled_q0.01_peak_848b
c	hr1 171081299 171082076 778 171081943 30.00 11.39468 4.11830	8.36399 E11.5_MANP_CHIP_G3BF_REP1_REP2_pooled_q0.01_peak_848c
c	hr1 171102202 171103339 1138 171102392 20.00 11.88794 5.73901	8.81922 E11.5_MANP_CHIP_G3BF_REP1_REP2_pooled_q0.01_peak_849a
c	hr1 171102202 171103339 1138 171102762 19.00 8.14055 4.06799	5.32214 E11.5_MANP_CHIP_G3BF_REP1_REP2_pooled_q0.01_peak_849b
c	hr1 171102202 171103339 1138 171103070 24.00 13.70739 5.86346	10.56365 E11.5_MANP_CHIP_G3BF_REP1_REP2_pooled_q0.01_peak_849c
c	hr1 171111223 171111526 304 171111333 14.00 6.82220 4.09929 4	.07683 E11.5_MANP_CHIP_G3BF_REP1_REP2_pooled_q0.01_peak_850
c	hr1 171114025 171114192 168 171114166 12.00 5.33746 3.55272 2	.71634 E11.5_MANP_CHIP_G3BF_REP1_REP2_pooled_q0.01_peak_851
c	hr1 171150030 171150923 894 171150470 47.00 31.36366 8.61888	27.54120 E11.5_MANP_CHIP_G3BF_REP1_REP2_pooled_q0.01_peak_852
c	hr1 171193784 171193951 168 171193870 24.00 15.68020 6.83215	12.41189 E11.5_MANP_CHIP_G3BF_REP1_REP2_pooled_q0.01_peak_853
c	hr1 171222289 171223106 818 171222714 91.00 104.16036 25.1423	1 99.27311 E11.5_MANP_CHIP_G3BF_REP1_REP2_pooled_q0.01_peak_854a
c	hr1 171222289 171223106 818 171223009 18.00 10.10829 5.19243	7.14298 E11.5_MANP_CHIP_G3BF_REP1_REP2_pooled_q0.01_peak_854b
c	hr1 171246893 171247342 450 171247002 27.00 18.70449 7.65201	15.30417 E11.5_MANP_CHIP_G3BF_REP1_REP2_pooled_q0.01_peak_855a
c	hr1 171246893 171247342 450 171247215 33.00 25.14942 9.29172	21.51036 E11.5_MANP_CHIP_G3BF_REP1_REP2_pooled_q0.01_peak_855b
c	hr1 171270131 171270480 350 171270251 21.00 12.80816 6.01229	9.68985 E11.5_MANP_CHIP_G3BF_REP1_REP2_pooled_q0.01_peak_856
c	hr1 171287475 171288059 585 171287839 32.00 24.04164 9.01844	20.43975 E11.5_MANP_CHIP_G3BF_REP1_REP2_pooled_q0.01_peak_857
c	hr1 171294341 171294940 600 171294474 19.00 10.98767 5.46572	7.97026 E11.5_MANP_CHIP_G3BF_REP1_REP2_pooled_q0.01_peak_858a
c	hr1 171294341 171294940 600 171294816 24.00 15.68020 6.83215	12.41189 E11.5_MANP_CHIP_G3BF_REP1_REP2_pooled_q0.01_peak_858b
c	hr1 171328710 171329955 1246 171329010 32.00 24.04164 9.01844	20.43975 E11.5_MANP_CHIP_G3BF_REP1_REP2_pooled_q0.01_peak_859a
c	hr1 171328710 171329955 1246 171329375 37.00 29.70242 10.3848	7 25.92228 E11.5_MANP_CHIP_G3BF_REP1_REP2_pooled_q0.01_peak_859b
c	hr1 171328710 171329955 1246 171329669 23.00 14.70505 6.55886	11.48259 E11.5_MANP_CHIP_G3BF_REP1_REP2_pooled_q0.01_peak_859c
c	hr1 171345594 171346131 538 171345816 28.00 15.39316 5.89859	12.16241 E11.5_MANP_CHIP_G3BF_REP1_REP2_pooled_q0.01_peak_860
c	hr1 171411019 171411171 153 171411130 15.00 7.60646 4.37258 4	.80472 E11.5_MANP_CHIP_G3BF_REP1_REP2_pooled_q0.01_peak_861
c	hr1 171411287 171412383 1097 171411416 25.00 12.82373 5.28839	9.69685 E11.5_MANP_CHIP_G3BF_REP1_REP2_pooled_q0.01_peak_862a
c	hr1 171411287 171412383 1097 171411753 30.00 21.57160 8.32612	18.07612 E11.5_MANP_CHIP_G3BF_REP1_REP2_pooled_q0.01_peak_862b
c	hr1 171411287 171412383 1097 171412110 24.00 10.59585 4.48900	7.61518 E11.5_MANP_CHIP_G3BF_REP1_REP2_pooled_q0.01_peak_862c
c	hr1 171502942 171503920 979 171503103 32.00 24.04164 9.01844	20.43975 E11.5_MANP_CHIP_G3BF_REP1_REP2_pooled_q0.01_peak_863a
c	hr1 171502942 171503920 979 171503482 25.00 15.40237 6.47572	12.17070 E11.5_MANP_CHIP_G3BF_REP1_REP2_pooled_q0.01_peak_863b
c	hr1 171502942 171503920 979 171503599 25.00 14.19393 5.90368	11.01388 E11.5_MANP_CHIP_G3BF_REP1_REP2_pooled_q0.01_peak_863c
c	hr1 172026479 172027792 1314 172026587 13.00 6.06527 3.82600	3.38153 E11.5_MANP_CHIP_G3BF_REP1_REP2_pooled_q0.01_peak_864a
c	hr1 172026479 172027792 1314 172026736 13.00 6.06527 3.82600	3.38153 E11.5_MANP_CHIP_G3BF_REP1_REP2_pooled_q0.01_peak_864b
c	hr1 172026479 172027792 1314 172027028 35.00 21.87894 7.32239	18.35325 E11.5_MANP_CHIP_G3BF_REP1_REP2_pooled_q0.01_peak_864c
c	hr1 172082540 172083342 803 172082737 17.00 9.25085 4.91915 6	.33859 E11.5_MANP_CHIP_G3BF_REP1_REP2_pooled_q0.01_peak_865a
c	hr1 172082540 172083342 803 172082938 27.00 18.70449 7.65201	15.30417 E11.5_MANP_CHIP_G3BF_REP1_REP2_pooled_q0.01_peak_865b
c	hr1 172126778 172127003 226 172126899 17.00 9.25085 4.91915 6	.33859 E11.5_MANP_CHIP_G3BF_REP1_REP2_pooled_q0.01_peak_866
c	hr1 172148070 172148913 844 172148286 49.00 39.33179 11.35324	35.30061 E11.5_MANP_CHIP_G3BF_REP1_REP2_pooled_q0.01_peak_867a
c	hr1 172148070 172148913 844 172148579 29.00 16.27946 6.10199	13.00298 E11.5_MANP_CHIP_G3BF_REP1_REP2_pooled_q0.01_peak_867b
c	hr1 172148070 172148913 844 172148820 15.00 7.60646 4.37258 4	.80472 E11.5_MANP_CHIP_G3BF_REP1_REP2_pooled_q0.01_peak_867c
c	hr1 172221253 172221628 376 172221330 14.00 6.82220 4.09929 4	.07683 E11.5_MANP_CHIP_G3BF_REP1_REP2_pooled_q0.01_peak_868
c	hr1 172221833 172221981 149 172221954 11.00 4.64076 3.27943 2	.08535 E11.5_MANP_CHIP_G3BF_REP1_REP2_pooled_q0.01_peak_869
c	hr1 172310186 172310411 226 172310303 20.00 10.63965 5.10669	7.65837 E11.5_MANP_CHIP_G3BF_REP1_REP2_pooled_q0.01_peak_870
c	hr1 172326270 172326440 171 172326385 13.00 5.60446 3.57349 2	.97600 E11.5_MANP_CHIP_G3BF_REP1_REP2_pooled_q0.01_peak_871
c	hr1 172376305 172376790 486 172376380 15.00 7.60646 4.37258 4	.80472 E11.5_MANP_CHIP_G3BF_REP1_REP2_pooled_q0.01_peak_872a
c	hr1 172376305 172376790 486 172376632 18.00 10.10829 5.19243	7.14298 E11.5_MANP_CHIP_G3BF_REP1_REP2_pooled_q0.01_peak_872b
c	hr1 172456394 172456542 149 172456476 17.00 9.25085 4.91915 6	.33859 E11.5_MANP_CHIP_G3BF_REP1_REP2_pooled_q0.01_peak_873
c	hr1 172481933 172482230 298 172482048 13.00 6.06527 3.82600 3	.38153 E11.5_MANP_CHIP_G3BF_REP1_REP2_pooled_q0.01_peak_874
c	hr1 172500111 172500689 579 172500268 24.00 13.70739 5.86346	10.56365 E11.5_MANP_CHIP_G3BF_REP1_REP2_pooled_q0.01_peak_875
c	hr1 172618046 172618711 666 172618388 147.00 196.69211 40.446	32 191.27287 E11.5_MANP_CHIP_G3BF_REP1_REP2_pooled_q0.01_peak_876
c	hr1 172632708 172632962 255 172632832 19.00 10.98767 5.46572	7.97026 E11.5_MANP_CHIP_G3BF_REP1_REP2_pooled_q0.01_peak_877
c	hr1 173350308 173350749 442 173350480 29.00 20.79730 8.19858	17.31392 E11.5_MANP_CHIP_G3BF_REP1_REP2_pooled_q0.01_peak_878
c	hr1 173361714 173362015 302 173361866 142.00 187.99393 39.079	90 182.61977 E11.5_MANP_CHIP_G3BF_REP1_REP2_pooled_q0.01_peak_879
c	hr1 174501932 174502258 327 174502031 17.00 9.25085 4.91915 6	.33859 E11.5_MANP_CHIP_G3BF_REP1_REP2_pooled_q0.01_peak_880
c	hr1 175079916 175080119 204 175080013 28.00 19.74358 7.92529	16.30083 E11.5_MANP_CHIP_G3BF_REP1_REP2_pooled_q0.01_peak_881
c	hr1 175492037 175492225 189 175492140 19.00 9.45664 4.69077 6	.53596 E11.5_MANP_CHIP_G3BF_REP1_REP2_pooled_q0.01_peak_882
c	hr1 175625009 175625562 554 175625187 22.00 13.74746 6.28558	10.57194 E11.5_MANP_CHIP_G3BF_REP1_REP2_pooled_q0.01_peak_883a
c	hr1 175625009 175625562 554 175625470 17.00 9.25085 4.91915 6	.33859 E11.5_MANP_CHIP_G3BF_REP1_REP2_pooled_q0.01_peak_883b
c	hr1 175692260 175692886 627 175692366 23.00 14.15814 6.28193	10.97878 E11.5_MANP_CHIP_G3BF_REP1_REP2_pooled_q0.01_peak_884a
c	hr1 175692260 175692886 627 175692530 25.00 11.35432 4.66856	8.32383 E11.5_MANP_CHIP_G3BF_REP1_REP2_pooled_q0.01_peak_884b
c	hr1 175692260 175692886 627 175692806 13.00 5.06128 3.28354 2	.49038 E11.5_MANP_CHIP_G3BF_REP1_REP2_pooled_q0.01_peak_884c
c	hr1 175880494 175881126 633 175880620 26.00 17.68052 7.37872	14.32329 E11.5_MANP_CHIP_G3BF_REP1_REP2_pooled_q0.01_peak_885a
c	hr1 175880494 175881126 633 175881036 22.00 13.74746 6.28558	10.57194 E11.5_MANP_CHIP_G3BF_REP1_REP2_pooled_q0.01_peak_885b
c	hr1 176697152 176697375 224 176697265 23.00 14.70505 6.55886	11.48259 E11.5_MANP_CHIP_G3BF_REP1_REP2_pooled_q0.01_peak_886
c	hr1 176813435 176814133 699 176813633 26.00 16.70029 6.89173	13.38561 E11.5_MANP_CHIP_G3BF_REP1_REP2_pooled_q0.01_peak_887a
c	hr1 176813435 176814133 699 176813955 31.00 22.94677 8.74515	19.38261 E11.5_MANP_CHIP_G3BF_REP1_REP2_pooled_q0.01_peak_887b
c	hr1 176814455 176814680 226 176814580 15.00 7.60646 4.37258 4	.80472 E11.5_MANP_CHIP_G3BF_REP1_REP2_pooled_q0.01_peak_888
c	hr1 177257283 177259227 1945 177257435 13.00 6.06527 3.82600	3.38153 E11.5_MANP_CHIP_G3BF_REP1_REP2_pooled_q0.01_peak_889a
c	hr1 177257283 177259227 1945 177257928 33.00 25.14942 9.29172	21.51036 E11.5_MANP_CHIP_G3BF_REP1_REP2_pooled_q0.01_peak_889b
c	hr1 177257283 177259227 1945 177258687 24.00 15.68020 6.83215	12.41189 E11.5_MANP_CHIP_G3BF_REP1_REP2_pooled_q0.01_peak_889c
c	hr1 177257283 177259227 1945 177258865 21.00 12.80816 6.01229	9.68985 E11.5_MANP_CHIP_G3BF_REP1_REP2_pooled_q0.01_peak_889d
c	hr1 177257283 177259227 1945 177259123 18.00 10.10829 5.19243	7.14298 E11.5_MANP_CHIP_G3BF_REP1_REP2_pooled_q0.01_peak_889e
c	hr1 177382910 177383101 192 177383010 20.00 11.88794 5.73901	8.81922 E11.5_MANP_CHIP_G3BF_REP1_REP2_pooled_q0.01_peak_890
c	hr1 177441558 177441920 363 177441784 21.00 12.80816 6.01229	9.68985 E11.5_MANP_CHIP_G3BF_REP1_REP2_pooled_q0.01_peak_891
c	hr1 177519033 177519295 263 177519226 11.00 4.64076 3.27943 2	.08535 E11.5_MANP_CHIP_G3BF_REP1_REP2_pooled_q0.01_peak_892
c	hr1 177795610 177796741 1132 177795928 34.00 26.26973 9.56501	22.59474 E11.5_MANP_CHIP_G3BF_REP1_REP2_pooled_q0.01_peak_893a
c	hr1 177795610 177796741 1132 177796241 27.00 18.70449 7.65201	15.30417 E11.5_MANP_CHIP_G3BF_REP1_REP2_pooled_q0.01_peak_893b
c	hr1 177795610 177796741 1132 177796465 16.00 7.14960 3.98715	4.39330 E11.5_MANP_CHIP_G3BF_REP1_REP2_pooled_q0.01_peak_893c
c	hr1 177795610 177796741 1132 177796646 24.00 15.68020 6.83215	12.41189 E11.5_MANP_CHIP_G3BF_REP1_REP2_pooled_q0.01_peak_893d
c	hr1 178187682 178187918 237 178187748 16.00 8.04724 4.44970 5	.23277 E11.5_MANP_CHIP_G3BF_REP1_REP2_pooled_q0.01_peak_894
c	hr1 178276143 178276844 702 178276584 50.00 45.66067 13.93758	41.49469 E11.5_MANP_CHIP_G3BF_REP1_REP2_pooled_q0.01_peak_895
c	hr1 178318191 178319584 1394 178318292 20.00 11.88794 5.73901	8.81922 E11.5_MANP_CHIP_G3BF_REP1_REP2_pooled_q0.01_peak_896a
c	hr1 178318191 178319584 1394 178318637 29.00 20.79730 8.19858	17.31392 E11.5_MANP_CHIP_G3BF_REP1_REP2_pooled_q0.01_peak_896b
c	hr1 178318191 178319584 1394 178318981 26.00 17.68052 7.37872	14.32329 E11.5_MANP_CHIP_G3BF_REP1_REP2_pooled_q0.01_peak_896c
c	hr1 178318191 178319584 1394 178319281 20.00 11.41729 5.49669	8.38526 E11.5_MANP_CHIP_G3BF_REP1_REP2_pooled_q0.01_peak_896d
c	hr1 178318191 178319584 1394 178319561 12.00 5.33746 3.55272	2.71634 E11.5_MANP_CHIP_G3BF_REP1_REP2_pooled_q0.01_peak_896e
c	hr1 178336082 178338142 2061 178336161 16.00 8.41648 4.64586	5.55904 E11.5_MANP_CHIP_G3BF_REP1_REP2_pooled_q0.01_peak_897a
c	hr1 178336082 178338142 2061 178336631 24.00 15.68020 6.83215	12.41189 E11.5_MANP_CHIP_G3BF_REP1_REP2_pooled_q0.01_peak_897b
c	hr1 178336082 178338142 2061 178337006 53.00 37.67887 9.69624	33.69828 E11.5_MANP_CHIP_G3BF_REP1_REP2_pooled_q0.01_peak_897c
c	hr1 178336082 178338142 2061 178337326 65.00 65.83990 18.0368	7 61.34968 E11.5_MANP_CHIP_G3BF_REP1_REP2_pooled_q0.01_peak_897d
c	hr1 178336082 178338142 2061 178337543 60.00 58.93180 16.6704	4 54.53807 E11.5_MANP_CHIP_G3BF_REP1_REP2_pooled_q0.01_peak_897e
c	hr1 178336082 178338142 2061 178338015 26.00 15.53067 6.33254	12.29179 E11.5_MANP_CHIP_G3BF_REP1_REP2_pooled_q0.01_peak_897f
c	hr1 178405401 178406880 1480 178405572 17.00 9.25085 4.91915	6.33859 E11.5_MANP_CHIP_G3BF_REP1_REP2_pooled_q0.01_peak_898a
c	hr1 178405401 178406880 1480 178405884 37.00 26.57711 8.91246	22.89555 E11.5_MANP_CHIP_G3BF_REP1_REP2_pooled_q0.01_peak_898b
c	hr1 178405401 178406880 1480 178406362 115.00 141.23338 31.15	579 136.09816 E11.5_MANP_CHIP_G3BF_REP1_REP2_pooled_q0.01_peak_898c
c	hr1 178528672 178529294 623 178528851 20.00 8.87424 4.27139 6	.00180 E11.5_MANP_CHIP_G3BF_REP1_REP2_pooled_q0.01_peak_899a
c	hr1 178528672 178529294 623 178529100 15.00 6.35365 3.71508 3	.66371 E11.5_MANP_CHIP_G3BF_REP1_REP2_pooled_q0.01_peak_899b
c	hr1 178530336 178530727 392 178530491 17.00 7.62406 4.08716 4	.82207 E11.5_MANP_CHIP_G3BF_REP1_REP2_pooled_q0.01_peak_900
c	hr1 179060537 179060984 448 179060839 12.00 5.33746 3.55272 2	.71634 E11.5_MANP_CHIP_G3BF_REP1_REP2_pooled_q0.01_peak_901
c	hr1 179087548 179087901 354 179087776 29.00 18.38166 7.03616	15.01118 E11.5_MANP_CHIP_G3BF_REP1_REP2_pooled_q0.01_peak_902
c	hr1 179108142 179108309 168 179108212 19.00 8.14055 4.06799 5	.32214 E11.5_MANP_CHIP_G3BF_REP1_REP2_pooled_q0.01_peak_903
c	hr1 179136449 179136752 304 179136585 29.00 20.79730 8.19858	17.31392 E11.5_MANP_CHIP_G3BF_REP1_REP2_pooled_q0.01_peak_904
c	hr1 179142303 179142451 149 179142379 15.00 7.60646 4.37258 4	.80472 E11.5_MANP_CHIP_G3BF_REP1_REP2_pooled_q0.01_peak_905
c	hr1 179446509 179446906 398 179446688 81.00 81.95284 19.23216	77.27628 E11.5_MANP_CHIP_G3BF_REP1_REP2_pooled_q0.01_peak_906
c	hr1 179545971 179546240 270 179546124 21.00 12.80816 6.01229	9.68985 E11.5_MANP_CHIP_G3BF_REP1_REP2_pooled_q0.01_peak_907
c	hr1 179574754 179574902 149 179574827 19.00 9.45664 4.69077 6	.53596 E11.5_MANP_CHIP_G3BF_REP1_REP2_pooled_q0.01_peak_908
c	hr1 179667969 179668159 191 179668056 17.00 9.25085 4.91915 6	.33859 E11.5_MANP_CHIP_G3BF_REP1_REP2_pooled_q0.01_peak_909
c	hr1 179668244 179668718 475 179668476 21.00 9.62773 4.47479 6	.70316 E11.5_MANP_CHIP_G3BF_REP1_REP2_pooled_q0.01_peak_910
c	hr1 179802724 179803757 1034 179803390 58.00 56.21718 16.1238	7 51.86526 E11.5_MANP_CHIP_G3BF_REP1_REP2_pooled_q0.01_peak_911
c	hr1 179847867 179848069 203 179847946 15.00 7.60646 4.37258 4	.80472 E11.5_MANP_CHIP_G3BF_REP1_REP2_pooled_q0.01_peak_912
c	hr1 179959526 179959801 276 179959701 19.00 9.45664 4.69077 6	.53596 E11.5_MANP_CHIP_G3BF_REP1_REP2_pooled_q0.01_peak_913
c	hr1 179959986 179960150 165 179960124 17.00 7.89603 4.22169 5	.08356 E11.5_MANP_CHIP_G3BF_REP1_REP2_pooled_q0.01_peak_914
c	hr1 179960317 179960610 294 179960441 20.00 11.88794 5.73901	8.81922 E11.5_MANP_CHIP_G3BF_REP1_REP2_pooled_q0.01_peak_915
c	hr1 180286099 180286339 241 180286198 14.00 5.73077 3.51808 3	.09497 E11.5_MANP_CHIP_G3BF_REP1_REP2_pooled_q0.01_peak_916
c	hr1 180330715 180331219 505 180330877 17.00 9.25085 4.91915 6	.33859 E11.5_MANP_CHIP_G3BF_REP1_REP2_pooled_q0.01_peak_917a
c	hr1 180330715 180331219 505 180331111 19.00 10.98767 5.46572	7.97026 E11.5_MANP_CHIP_G3BF_REP1_REP2_pooled_q0.01_peak_917b
c	hr1 180482991 180483203 213 180483047 11.00 4.64076 3.27943 2	.08535 E11.5_MANP_CHIP_G3BF_REP1_REP2_pooled_q0.01_peak_918
c	hr1 180568836 180569339 504 180569075 28.00 19.74358 7.92529	16.30083 E11.5_MANP_CHIP_G3BF_REP1_REP2_pooled_q0.01_peak_919
c	hr1 180640487 180641961 1475 180640710 18.00 8.66541 4.45623	5.79866 E11.5_MANP_CHIP_G3BF_REP1_REP2_pooled_q0.01_peak_920a
c	hr1 180640487 180641961 1475 180640936 37.00 23.84374 7.72919	20.26654 E11.5_MANP_CHIP_G3BF_REP1_REP2_pooled_q0.01_peak_920b
c	hr1 180640487 180641961 1475 180641396 49.00 28.53230 7.27310	24.80025 E11.5_MANP_CHIP_G3BF_REP1_REP2_pooled_q0.01_peak_920c
c	hr1 180726050 180726521 472 180726137 26.00 13.66477 5.49179	10.52614 E11.5_MANP_CHIP_G3BF_REP1_REP2_pooled_q0.01_peak_921a
c	hr1 180726050 180726521 472 180726445 24.00 15.10785 6.54368	11.88141 E11.5_MANP_CHIP_G3BF_REP1_REP2_pooled_q0.01_peak_921b
c	hr1 180763870 180764154 285 180764025 16.00 8.41648 4.64586 5	.55904 E11.5_MANP_CHIP_G3BF_REP1_REP2_pooled_q0.01_peak_922
c	hr1 180811722 180812191 470 180811821 23.00 14.70505 6.55886	11.48259 E11.5_MANP_CHIP_G3BF_REP1_REP2_pooled_q0.01_peak_923a
c	hr1 180811722 180812191 470 180812116 12.00 5.33746 3.55272 2	.71634 E11.5_MANP_CHIP_G3BF_REP1_REP2_pooled_q0.01_peak_923b
c	hr1 180812279 180813648 1370 180812633 34.00 26.26973 9.56501	22.59474 E11.5_MANP_CHIP_G3BF_REP1_REP2_pooled_q0.01_peak_924a
c	hr1 180812279 180813648 1370 180813467 35.00 21.87894 7.32239	18.35325 E11.5_MANP_CHIP_G3BF_REP1_REP2_pooled_q0.01_peak_924b
c	hr1 180813756 180814508 753 180813952 36.00 28.54655 10.11158	24.80025 E11.5_MANP_CHIP_G3BF_REP1_REP2_pooled_q0.01_peak_925a
c	hr1 180813756 180814508 753 180814224 33.00 25.14942 9.29172	21.51036 E11.5_MANP_CHIP_G3BF_REP1_REP2_pooled_q0.01_peak_925b
c	hr1 180850619 180850772 154 180850684 16.00 5.19348 3.05252 2	.61892 E11.5_MANP_CHIP_G3BF_REP1_REP2_pooled_q0.01_peak_926
c	hr1 180851027 180851455 429 180851116 15.00 7.26249 4.18795 4	.50415 E11.5_MANP_CHIP_G3BF_REP1_REP2_pooled_q0.01_peak_927a
c	hr1 180851027 180851455 429 180851282 20.00 7.73626 3.77076 4	.93182 E11.5_MANP_CHIP_G3BF_REP1_REP2_pooled_q0.01_peak_927b
c	hr1 180904292 180904914 623 180904433 30.00 19.36089 7.27069	15.94879 E11.5_MANP_CHIP_G3BF_REP1_REP2_pooled_q0.01_peak_928
c	hr1 180942205 180942387 183 180942295 16.00 8.41648 4.64586 5	.55904 E11.5_MANP_CHIP_G3BF_REP1_REP2_pooled_q0.01_peak_929
c	hr1 181143971 181144527 557 181144039 16.00 8.41648 4.64586 5	.55904 E11.5_MANP_CHIP_G3BF_REP1_REP2_pooled_q0.01_peak_930a
c	hr1 181143971 181144527 557 181144332 28.00 19.74358 7.92529	16.30083 E11.5_MANP_CHIP_G3BF_REP1_REP2_pooled_q0.01_peak_930b
c	hr1 181150957 181151328 372 181151079 28.00 15.39316 5.89859	12.16241 E11.5_MANP_CHIP_G3BF_REP1_REP2_pooled_q0.01_peak_931
c	hr1 181210964 181212360 1397 181211094 18.00 10.10829 5.19243	7.14298 E11.5_MANP_CHIP_G3BF_REP1_REP2_pooled_q0.01_peak_932a
c	hr1 181210964 181212360 1397 181211623 35.00 27.40221 9.83829	23.69099 E11.5_MANP_CHIP_G3BF_REP1_REP2_pooled_q0.01_peak_932b
c	hr1 181210964 181212360 1397 181212080 20.00 10.26867 4.92531	7.29611 E11.5_MANP_CHIP_G3BF_REP1_REP2_pooled_q0.01_peak_932c
c	hr1 181352303 181352497 195 181352382 13.00 6.06527 3.82600 3	.38153 E11.5_MANP_CHIP_G3BF_REP1_REP2_pooled_q0.01_peak_933
c	hr1 181465228 181465459 232 181465329 23.00 14.70505 6.55886	11.48259 E11.5_MANP_CHIP_G3BF_REP1_REP2_pooled_q0.01_peak_934
c	hr1 181562133 181562374 242 181562252 30.00 21.86518 8.47186	18.34202 E11.5_MANP_CHIP_G3BF_REP1_REP2_pooled_q0.01_peak_935
c	hr1 181743290 181743744 455 181743363 16.00 5.19348 3.05252 2	.61892 E11.5_MANP_CHIP_G3BF_REP1_REP2_pooled_q0.01_peak_936a
c	hr1 181743290 181743744 455 181743650 19.00 10.54240 5.23494	7.56312 E11.5_MANP_CHIP_G3BF_REP1_REP2_pooled_q0.01_peak_936b
c	hr1 181841669 181841825 157 181841811 15.00 5.42355 3.25439 2	.79831 E11.5_MANP_CHIP_G3BF_REP1_REP2_pooled_q0.01_peak_937
c	hr1 181841905 181842324 420 181842121 17.00 9.25085 4.91915 6	.33859 E11.5_MANP_CHIP_G3BF_REP1_REP2_pooled_q0.01_peak_938
c	hr1 181842519 181842673 155 181842642 18.00 5.58518 3.05373 2	.95791 E11.5_MANP_CHIP_G3BF_REP1_REP2_pooled_q0.01_peak_939
c	hr1 181888895 181889056 162 181888975 15.00 7.60646 4.37258 4	.80472 E11.5_MANP_CHIP_G3BF_REP1_REP2_pooled_q0.01_peak_940
c	hr1 182018636 182019073 438 182018727 14.00 6.82220 4.09929 4	.07683 E11.5_MANP_CHIP_G3BF_REP1_REP2_pooled_q0.01_peak_941a
c	hr1 182018636 182019073 438 182018894 17.00 9.25085 4.91915 6	.33859 E11.5_MANP_CHIP_G3BF_REP1_REP2_pooled_q0.01_peak_941b
c	hr1 182019215 182020761 1547 182019361 37.00 26.57711 8.91246	22.89555 E11.5_MANP_CHIP_G3BF_REP1_REP2_pooled_q0.01_peak_942a
c	hr1 182019215 182020761 1547 182019622 21.00 10.99307 5.10823	7.97535 E11.5_MANP_CHIP_G3BF_REP1_REP2_pooled_q0.01_peak_942b
c	hr1 182019215 182020761 1547 182019819 14.00 6.32173 3.82874	3.63220 E11.5_MANP_CHIP_G3BF_REP1_REP2_pooled_q0.01_peak_942c
c	hr1 182019215 182020761 1547 182019980 14.00 6.82220 4.09929	4.07683 E11.5_MANP_CHIP_G3BF_REP1_REP2_pooled_q0.01_peak_942d
c	hr1 182019215 182020761 1547 182020229 24.00 15.68020 6.83215	12.41189 E11.5_MANP_CHIP_G3BF_REP1_REP2_pooled_q0.01_peak_942e
c	hr1 182019215 182020761 1547 182020531 22.00 10.40017 4.67819	7.42281 E11.5_MANP_CHIP_G3BF_REP1_REP2_pooled_q0.01_peak_942f
c	hr1 182113573 182113792 220 182113673 19.00 7.06863 3.59120 4	.31928 E11.5_MANP_CHIP_G3BF_REP1_REP2_pooled_q0.01_peak_943
c	hr1 182124748 182125312 565 182125047 38.00 30.86952 10.65815	27.05543 E11.5_MANP_CHIP_G3BF_REP1_REP2_pooled_q0.01_peak_944
c	hr1 182145567 182146068 502 182145820 97.00 105.03372 22.9847	8 100.14245 E11.5_MANP_CHIP_G3BF_REP1_REP2_pooled_q0.01_peak_945
c	hr1 182282172 182282747 576 182282291 14.00 5.73077 3.51808 3	.09497 E11.5_MANP_CHIP_G3BF_REP1_REP2_pooled_q0.01_peak_946a
c	hr1 182282172 182282747 576 182282629 27.00 18.05574 7.32892	14.69405 E11.5_MANP_CHIP_G3BF_REP1_REP2_pooled_q0.01_peak_946b
c	hr1 182341166 182341566 401 182341301 25.00 16.67223 7.10544	13.35840 E11.5_MANP_CHIP_G3BF_REP1_REP2_pooled_q0.01_peak_947a
c	hr1 182341166 182341566 401 182341440 20.00 11.41729 5.49669	8.38526 E11.5_MANP_CHIP_G3BF_REP1_REP2_pooled_q0.01_peak_947b
c	hr1 182408694 182408945 252 182408837 23.00 12.82070 5.62892	9.69682 E11.5_MANP_CHIP_G3BF_REP1_REP2_pooled_q0.01_peak_948
c	hr1 182409090 182409666 577 182409234 46.00 33.21080 9.55978	29.34756 E11.5_MANP_CHIP_G3BF_REP1_REP2_pooled_q0.01_peak_949
c	hr1 182409847 182409995 149 182409937 15.00 7.60646 4.37258 4	.80472 E11.5_MANP_CHIP_G3BF_REP1_REP2_pooled_q0.01_peak_950
c	hr1 182500933 182501149 217 182500983 11.00 4.64076 3.27943 2	.08535 E11.5_MANP_CHIP_G3BF_REP1_REP2_pooled_q0.01_peak_951
c	hr1 182516859 182517632 774 182517176 29.00 20.79730 8.19858	17.31392 E11.5_MANP_CHIP_G3BF_REP1_REP2_pooled_q0.01_peak_952a
c	hr1 182516859 182517632 774 182517458 29.00 14.54405 5.38680	11.35712 E11.5_MANP_CHIP_G3BF_REP1_REP2_pooled_q0.01_peak_952b
c	hr1 182638844 182639410 567 182639276 28.00 19.47061 7.78895	16.05710 E11.5_MANP_CHIP_G3BF_REP1_REP2_pooled_q0.01_peak_953
c	hr1 183147670 183147872 203 183147841 12.00 5.33746 3.55272 2	.71634 E11.5_MANP_CHIP_G3BF_REP1_REP2_pooled_q0.01_peak_954
c	hr1 183221198 183221495 298 183221360 22.00 13.74746 6.28558	10.57194 E11.5_MANP_CHIP_G3BF_REP1_REP2_pooled_q0.01_peak_955
c	hr1 183345128 183345548 421 183345419 13.00 5.06128 3.28354 2	.49038 E11.5_MANP_CHIP_G3BF_REP1_REP2_pooled_q0.01_peak_956
c	hr1 183369125 183369685 561 183369240 21.00 11.10059 5.15985	8.07674 E11.5_MANP_CHIP_G3BF_REP1_REP2_pooled_q0.01_peak_957a
c	hr1 183369125 183369685 561 183369538 19.00 10.28788 5.10498	7.31436 E11.5_MANP_CHIP_G3BF_REP1_REP2_pooled_q0.01_peak_957b
c	hr1 183669114 183669415 302 183669280 30.00 19.36089 7.27069	15.94879 E11.5_MANP_CHIP_G3BF_REP1_REP2_pooled_q0.01_peak_958
c	hr1 184033385 184034101 717 184033691 16.00 8.26679 4.56593 5	.44596 E11.5_MANP_CHIP_G3BF_REP1_REP2_pooled_q0.01_peak_959a
c	hr1 184033385 184034101 717 184034026 11.00 4.54195 3.22301 2	.03764 E11.5_MANP_CHIP_G3BF_REP1_REP2_pooled_q0.01_peak_959b
c	hr1 184033385 184034101 717 184034045 15.00 6.42739 3.75262 3	.72916 E11.5_MANP_CHIP_G3BF_REP1_REP2_pooled_q0.01_peak_959c
c	hr1 184244600 184244935 336 184244843 12.00 5.33746 3.55272 2	.71634 E11.5_MANP_CHIP_G3BF_REP1_REP2_pooled_q0.01_peak_960
c	hr1 184845385 184845790 406 184845506 16.00 8.41648 4.64586 5	.55904 E11.5_MANP_CHIP_G3BF_REP1_REP2_pooled_q0.01_peak_961
c	hr1 184999205 184999564 360 184999440 22.00 13.74746 6.28558	10.57194 E11.5_MANP_CHIP_G3BF_REP1_REP2_pooled_q0.01_peak_962
c	hr1 185000112 185000306 195 185000282 13.00 6.06527 3.82600 3	.38153 E11.5_MANP_CHIP_G3BF_REP1_REP2_pooled_q0.01_peak_963
c	hr1 185328832 185329340 509 185329005 18.00 10.10829 5.19243	7.14298 E11.5_MANP_CHIP_G3BF_REP1_REP2_pooled_q0.01_peak_964a
c	hr1 185328832 185329340 509 185329227 20.00 11.88794 5.73901	8.81922 E11.5_MANP_CHIP_G3BF_REP1_REP2_pooled_q0.01_peak_964b
c	hr1 185363188 185363556 369 185363259 14.00 6.82220 4.09929 4	.07683 E11.5_MANP_CHIP_G3BF_REP1_REP2_pooled_q0.01_peak_965
c	hr1 185730288 185730536 249 185730428 28.00 19.74358 7.92529	16.30083 E11.5_MANP_CHIP_G3BF_REP1_REP2_pooled_q0.01_peak_966
c	hr1 185730990 185731301 312 185731198 24.00 15.68020 6.83215	12.41189 E11.5_MANP_CHIP_G3BF_REP1_REP2_pooled_q0.01_peak_967
c	hr1 185741258 185741741 484 185741555 38.00 30.86952 10.65815	27.05543 E11.5_MANP_CHIP_G3BF_REP1_REP2_pooled_q0.01_peak_968
c	hr1 186271465 186271750 286 186271626 41.00 34.43552 11.47801	30.52167 E11.5_MANP_CHIP_G3BF_REP1_REP2_pooled_q0.01_peak_969
c	hr1 186703964 186704121 158 186704036 16.00 8.41648 4.64586 5	.55904 E11.5_MANP_CHIP_G3BF_REP1_REP2_pooled_q0.01_peak_970
c	hr1 186704216 186704419 204 186704336 12.00 5.33746 3.55272 2	.71634 E11.5_MANP_CHIP_G3BF_REP1_REP2_pooled_q0.01_peak_971
c	hr1 186705090 186705683 594 186705198 20.00 11.88794 5.73901	8.81922 E11.5_MANP_CHIP_G3BF_REP1_REP2_pooled_q0.01_peak_972a
c	hr1 186705090 186705683 594 186705459 17.00 7.89603 4.22169 5	.08356 E11.5_MANP_CHIP_G3BF_REP1_REP2_pooled_q0.01_peak_972b
c	hr1 186749123 186749673 551 186749234 16.00 7.14960 3.98715 4	.39330 E11.5_MANP_CHIP_G3BF_REP1_REP2_pooled_q0.01_peak_973a
c	hr1 186749123 186749673 551 186749405 23.00 14.70505 6.55886	11.48259 E11.5_MANP_CHIP_G3BF_REP1_REP2_pooled_q0.01_peak_973b
c	hr1 186749123 186749673 551 186749554 22.00 13.74746 6.28558	10.57194 E11.5_MANP_CHIP_G3BF_REP1_REP2_pooled_q0.01_peak_973c
c	hr1 187215494 187215716 223 187215606 16.00 8.41648 4.64586 5	.55904 E11.5_MANP_CHIP_G3BF_REP1_REP2_pooled_q0.01_peak_974
c	hr1 187353061 187353510 450 187353184 25.00 12.82373 5.28839	9.69685 E11.5_MANP_CHIP_G3BF_REP1_REP2_pooled_q0.01_peak_975
c	hr1 187353644 187353834 191 187353746 14.00 6.82220 4.09929 4	.07683 E11.5_MANP_CHIP_G3BF_REP1_REP2_pooled_q0.01_peak_976
c	hr1 187354045 187354867 823 187354188 19.00 10.98767 5.46572	7.97026 E11.5_MANP_CHIP_G3BF_REP1_REP2_pooled_q0.01_peak_977a
c	hr1 187354045 187354867 823 187354636 13.00 6.06527 3.82600 3	.38153 E11.5_MANP_CHIP_G3BF_REP1_REP2_pooled_q0.01_peak_977b
c	hr1 187354045 187354867 823 187354686 14.00 5.73077 3.51808 3	.09497 E11.5_MANP_CHIP_G3BF_REP1_REP2_pooled_q0.01_peak_977c
c	hr1 187355029 187355955 927 187355092 14.00 6.50346 3.92621 3	.80374 E11.5_MANP_CHIP_G3BF_REP1_REP2_pooled_q0.01_peak_978a
c	hr1 187355029 187355955 927 187355369 19.00 7.06863 3.59120 4	.31928 E11.5_MANP_CHIP_G3BF_REP1_REP2_pooled_q0.01_peak_978b
c	hr1 187355029 187355955 927 187355633 29.00 18.38166 7.03616	15.01118 E11.5_MANP_CHIP_G3BF_REP1_REP2_pooled_q0.01_peak_978c
c	hr1 187356341 187356538 198 187356474 16.00 8.41648 4.64586 5	.55904 E11.5_MANP_CHIP_G3BF_REP1_REP2_pooled_q0.01_peak_979
c	hr1 188660460 188660696 237 188660590 25.00 16.67223 7.10544	13.35840 E11.5_MANP_CHIP_G3BF_REP1_REP2_pooled_q0.01_peak_980
c	hr1 189007363 189007930 568 189007721 29.00 20.79730 8.19858	17.31392 E11.5_MANP_CHIP_G3BF_REP1_REP2_pooled_q0.01_peak_981
c	hr1 189430104 189430540 437 189430242 17.00 9.25085 4.91915 6	.33859 E11.5_MANP_CHIP_G3BF_REP1_REP2_pooled_q0.01_peak_982
c	hr1 189623837 189623985 149 189623960 19.00 10.98767 5.46572	7.97026 E11.5_MANP_CHIP_G3BF_REP1_REP2_pooled_q0.01_peak_983
c	hr1 189687892 189688128 237 189687962 15.00 7.60646 4.37258 4	.80472 E11.5_MANP_CHIP_G3BF_REP1_REP2_pooled_q0.01_peak_984
c	hr1 189727513 189728662 1150 189727757 16.00 8.41648 4.64586	5.55904 E11.5_MANP_CHIP_G3BF_REP1_REP2_pooled_q0.01_peak_985a
c	hr1 189727513 189728662 1150 189728019 26.00 15.53067 6.33254	12.29179 E11.5_MANP_CHIP_G3BF_REP1_REP2_pooled_q0.01_peak_985b
c	hr1 189727513 189728662 1150 189728362 21.00 12.80816 6.01229	9.68985 E11.5_MANP_CHIP_G3BF_REP1_REP2_pooled_q0.01_peak_985c
c	hr1 189882987 189883150 164 189883061 16.00 6.06792 3.45779 3	.38153 E11.5_MANP_CHIP_G3BF_REP1_REP2_pooled_q0.01_peak_986
c	hr1 189921437 189921602 166 189921484 11.00 4.64076 3.27943 2	.08535 E11.5_MANP_CHIP_G3BF_REP1_REP2_pooled_q0.01_peak_987
c	hr1 189921877 189922278 402 189922165 22.00 13.74746 6.28558	10.57194 E11.5_MANP_CHIP_G3BF_REP1_REP2_pooled_q0.01_peak_988
c	hr1 189922419 189922571 153 189922522 16.00 7.14960 3.98715 4	.39330 E11.5_MANP_CHIP_G3BF_REP1_REP2_pooled_q0.01_peak_989
c	hr1 189922785 189922965 181 189922858 14.00 6.82220 4.09929 4	.07683 E11.5_MANP_CHIP_G3BF_REP1_REP2_pooled_q0.01_peak_990
c	hr1 190911642 190912045 404 190911970 14.00 6.69293 4.02877 3	.99055 E11.5_MANP_CHIP_G3BF_REP1_REP2_pooled_q0.01_peak_991
c	hr1 190928533 190929278 746 190928713 27.00 18.44181 7.52036	15.07000 E11.5_MANP_CHIP_G3BF_REP1_REP2_pooled_q0.01_peak_992a
c	hr1 190928533 190929278 746 190929118 16.00 6.06792 3.45779 3	.38153 E11.5_MANP_CHIP_G3BF_REP1_REP2_pooled_q0.01_peak_992b
c	hr1 190977956 190978160 205 190978044 17.00 7.89603 4.22169 5	.08356 E11.5_MANP_CHIP_G3BF_REP1_REP2_pooled_q0.01_peak_993
c	hr1 190978275 190978616 342 190978348 18.00 8.66541 4.45623 5	.79866 E11.5_MANP_CHIP_G3BF_REP1_REP2_pooled_q0.01_peak_994a
c	hr1 190978275 190978616 342 190978543 12.00 5.33746 3.55272 2	.71634 E11.5_MANP_CHIP_G3BF_REP1_REP2_pooled_q0.01_peak_994b
c	hr1 190978742 190979254 513 190978904 21.00 11.10059 5.15985	8.07674 E11.5_MANP_CHIP_G3BF_REP1_REP2_pooled_q0.01_peak_995a
c	hr1 190978742 190979254 513 190979111 20.00 11.88794 5.73901	8.81922 E11.5_MANP_CHIP_G3BF_REP1_REP2_pooled_q0.01_peak_995b
c	hr1 191025669 191026205 537 191025796 17.00 6.73634 3.66119 4	.03008 E11.5_MANP_CHIP_G3BF_REP1_REP2_pooled_q0.01_peak_996a
c	hr1 191025669 191026205 537 191026090 19.00 10.98767 5.46572	7.97026 E11.5_MANP_CHIP_G3BF_REP1_REP2_pooled_q0.01_peak_996b
c	hr1 191062267 191062420 154 191062347 18.00 8.57482 4.41166 5	.71526 E11.5_MANP_CHIP_G3BF_REP1_REP2_pooled_q0.01_peak_997
c	hr1 191062742 191063431 690 191062927 28.00 19.74358 7.92529	16.30083 E11.5_MANP_CHIP_G3BF_REP1_REP2_pooled_q0.01_peak_998a
c	hr1 191062742 191063431 690 191063172 26.00 13.66477 5.49179	10.52614 E11.5_MANP_CHIP_G3BF_REP1_REP2_pooled_q0.01_peak_998b
c	hr1 191097833 191098578 746 191098157 98.00 98.95739 20.13656	94.11972 E11.5_MANP_CHIP_G3BF_REP1_REP2_pooled_q0.01_peak_999
c	hr1 191120943 191121100 158 191121006 41.00 7.56958 2.52014 4	.80453 E11.5_MANP_CHIP_G3BF_REP1_REP2_pooled_q0.01_peak_1000
c	hr1 191182936 191183113 178 191183082 12.00 5.33746 3.55272 2	.71634 E11.5_MANP_CHIP_G3BF_REP1_REP2_pooled_q0.01_peak_1001
c	hr1 191224498 191224663 166 191224608 15.00 7.60646 4.37258 4	.80472 E11.5_MANP_CHIP_G3BF_REP1_REP2_pooled_q0.01_peak_1002
c	hr1 191224758 191225050 293 191224836 15.00 7.60646 4.37258 4	.80472 E11.5_MANP_CHIP_G3BF_REP1_REP2_pooled_q0.01_peak_1003a
c	hr1 191224758 191225050 293 191224948 12.00 5.33746 3.55272 2	.71634 E11.5_MANP_CHIP_G3BF_REP1_REP2_pooled_q0.01_peak_1003b
c	hr1 191317756 191318238 483 191317984 23.00 14.70505 6.55886	11.48259 E11.5_MANP_CHIP_G3BF_REP1_REP2_pooled_q0.01_peak_1004
c	hr1 191325845 191326129 285 191325966 17.00 7.81106 4.17946 5	.00598 E11.5_MANP_CHIP_G3BF_REP1_REP2_pooled_q0.01_peak_1005
c	hr1 191396139 191397192 1054 191396354 18.00 8.37538 4.31423	5.55411 E11.5_MANP_CHIP_G3BF_REP1_REP2_pooled_q0.01_peak_1006a
c	hr1 191396139 191397192 1054 191396920 42.00 35.64489 11.7513	0 31.70040 E11.5_MANP_CHIP_G3BF_REP1_REP2_pooled_q0.01_peak_1006b
c	hr1 191397320 191397566 247 191397436 20.00 11.88794 5.73901	8.81922 E11.5_MANP_CHIP_G3BF_REP1_REP2_pooled_q0.01_peak_1007
c	hr1 191574490 191574691 202 191574600 14.00 6.82220 4.09929 4	.07683 E11.5_MANP_CHIP_G3BF_REP1_REP2_pooled_q0.01_peak_1008
c	hr1 191574825 191575588 764 191575206 20.00 11.88794 5.73901	8.81922 E11.5_MANP_CHIP_G3BF_REP1_REP2_pooled_q0.01_peak_1009a
c	hr1 191574825 191575588 764 191575433 26.00 17.68052 7.37872	14.32329 E11.5_MANP_CHIP_G3BF_REP1_REP2_pooled_q0.01_peak_1009b
c	hr1 191575739 191575971 233 191575903 17.00 9.09092 4.83452 6	.21578 E11.5_MANP_CHIP_G3BF_REP1_REP2_pooled_q0.01_peak_1010
c	hr1 191717614 191719232 1619 191718134 50.00 45.66067 13.9375	8 41.49469 E11.5_MANP_CHIP_G3BF_REP1_REP2_pooled_q0.01_peak_1011a
c	hr1 191717614 191719232 1619 191718589 22.00 11.95153 5.39439	8.87686 E11.5_MANP_CHIP_G3BF_REP1_REP2_pooled_q0.01_peak_1011b
c	hr1 191717614 191719232 1619 191718815 24.00 9.41637 4.01806	6.50269 E11.5_MANP_CHIP_G3BF_REP1_REP2_pooled_q0.01_peak_1011c
c	hr1 191817820 191818074 255 191817970 17.00 9.25085 4.91915 6	.33859 E11.5_MANP_CHIP_G3BF_REP1_REP2_pooled_q0.01_peak_1012
c	hr1 191821479 191821969 491 191821601 24.00 15.68020 6.83215	12.41189 E11.5_MANP_CHIP_G3BF_REP1_REP2_pooled_q0.01_peak_1013a
c	hr1 191821479 191821969 491 191821803 18.00 10.10829 5.19243	7.14298 E11.5_MANP_CHIP_G3BF_REP1_REP2_pooled_q0.01_peak_1013b
c	hr1 191906786 191907054 269 191906880 14.00 6.82220 4.09929 4	.07683 E11.5_MANP_CHIP_G3BF_REP1_REP2_pooled_q0.01_peak_1014
c	hr1 192136458 192136624 167 192136545 17.00 9.09092 4.83452 6	.21578 E11.5_MANP_CHIP_G3BF_REP1_REP2_pooled_q0.01_peak_1015
c	hr1 192136876 192137024 149 192136953 13.00 6.06527 3.82600 3	.38153 E11.5_MANP_CHIP_G3BF_REP1_REP2_pooled_q0.01_peak_1016
c	hr1 192137197 192137588 392 192137471 17.00 9.25085 4.91915 6	.33859 E11.5_MANP_CHIP_G3BF_REP1_REP2_pooled_q0.01_peak_1017
c	hr1 192137686 192138579 894 192137942 28.00 19.74358 7.92529	16.30083 E11.5_MANP_CHIP_G3BF_REP1_REP2_pooled_q0.01_peak_1018a
c	hr1 192137686 192138579 894 192138134 19.00 10.98767 5.46572	7.97026 E11.5_MANP_CHIP_G3BF_REP1_REP2_pooled_q0.01_peak_1018b
c	hr1 192137686 192138579 894 192138316 21.00 9.62773 4.47479 6	.70316 E11.5_MANP_CHIP_G3BF_REP1_REP2_pooled_q0.01_peak_1018c
c	hr1 192457608 192457807 200 192457692 19.00 10.98767 5.46572	7.97026 E11.5_MANP_CHIP_G3BF_REP1_REP2_pooled_q0.01_peak_1019
c	hr1 192770630 192770920 291 192770878 15.00 6.42739 3.75262 3	.72916 E11.5_MANP_CHIP_G3BF_REP1_REP2_pooled_q0.01_peak_1020
c	hr1 192789975 192790123 149 192790040 16.00 7.14960 3.98715 4	.39330 E11.5_MANP_CHIP_G3BF_REP1_REP2_pooled_q0.01_peak_1021
c	hr1 192796406 192796563 158 192796475 21.00 9.11007 4.24539 6	.23488 E11.5_MANP_CHIP_G3BF_REP1_REP2_pooled_q0.01_peak_1022
c	hr1 192799501 192800194 694 192799651 31.00 20.35381 7.50523	16.90069 E11.5_MANP_CHIP_G3BF_REP1_REP2_pooled_q0.01_peak_1023a
c	hr1 192799501 192800194 694 192800032 13.00 5.06128 3.28354 2	.49038 E11.5_MANP_CHIP_G3BF_REP1_REP2_pooled_q0.01_peak_1023b
c	hr1 192823137 192823488 352 192823344 49.00 41.80168 12.45331	37.73216 E11.5_MANP_CHIP_G3BF_REP1_REP2_pooled_q0.01_peak_1024
c	hr1 192833639 192833899 261 192833759 15.00 5.42355 3.25439 2	.79831 E11.5_MANP_CHIP_G3BF_REP1_REP2_pooled_q0.01_peak_1025
c	hr1 192834878 192835413 536 192835128 32.00 12.79520 4.38399	9.68985 E11.5_MANP_CHIP_G3BF_REP1_REP2_pooled_q0.01_peak_1026
c	hr1 192854958 192855343 386 192855075 28.00 17.41656 6.80162	14.08928 E11.5_MANP_CHIP_G3BF_REP1_REP2_pooled_q0.01_peak_1027
c	hr1 192855461 192856174 714 192855563 12.00 5.33746 3.55272 2	.71634 E11.5_MANP_CHIP_G3BF_REP1_REP2_pooled_q0.01_peak_1028a
c	hr1 192855461 192856174 714 192855723 13.00 6.06527 3.82600 3	.38153 E11.5_MANP_CHIP_G3BF_REP1_REP2_pooled_q0.01_peak_1028b
c	hr1 192855461 192856174 714 192855868 18.00 10.10829 5.19243	7.14298 E11.5_MANP_CHIP_G3BF_REP1_REP2_pooled_q0.01_peak_1028c
c	hr1 192855461 192856174 714 192856058 22.00 13.74746 6.28558	10.57194 E11.5_MANP_CHIP_G3BF_REP1_REP2_pooled_q0.01_peak_1028d
c	hr1 193035391 193035730 340 193035565 19.00 10.98767 5.46572	7.97026 E11.5_MANP_CHIP_G3BF_REP1_REP2_pooled_q0.01_peak_1029
c	hr1 193036012 193036289 278 193036120 17.00 7.89603 4.22169 5	.08356 E11.5_MANP_CHIP_G3BF_REP1_REP2_pooled_q0.01_peak_1030
c	hr1 193130362 193130572 211 193130430 16.00 8.41648 4.64586 5	.55904 E11.5_MANP_CHIP_G3BF_REP1_REP2_pooled_q0.01_peak_1031
c	hr1 193172958 193173918 961 193173312 27.00 18.70449 7.65201	15.30417 E11.5_MANP_CHIP_G3BF_REP1_REP2_pooled_q0.01_peak_1032a
c	hr1 193172958 193173918 961 193173708 23.00 14.70505 6.55886	11.48259 E11.5_MANP_CHIP_G3BF_REP1_REP2_pooled_q0.01_peak_1032b
c	hr1 193227739 193228002 264 193227876 45.00 6.99319 2.30815 4	.24647 E11.5_MANP_CHIP_G3BF_REP1_REP2_pooled_q0.01_peak_1033
c	hr1 193382480 193382689 210 193382570 26.00 13.66477 5.49179	10.52614 E11.5_MANP_CHIP_G3BF_REP1_REP2_pooled_q0.01_peak_1034
c	hr1 193386226 193386628 403 193386375 27.00 18.70449 7.65201	15.30417 E11.5_MANP_CHIP_G3BF_REP1_REP2_pooled_q0.01_peak_1035
c	hr1 193419190 193419486 297 193419322 38.00 30.86952 10.65815	27.05543 E11.5_MANP_CHIP_G3BF_REP1_REP2_pooled_q0.01_peak_1036
c	hr1 193514470 193514748 279 193514621 25.00 14.61092 6.09800	11.41868 E11.5_MANP_CHIP_G3BF_REP1_REP2_pooled_q0.01_peak_1037
c	hr1 193665709 193665872 164 193665795 14.00 6.82220 4.09929 4	.07683 E11.5_MANP_CHIP_G3BF_REP1_REP2_pooled_q0.01_peak_1038
c	hr1 193738923 193739077 155 193738996 18.00 10.10829 5.19243	7.14298 E11.5_MANP_CHIP_G3BF_REP1_REP2_pooled_q0.01_peak_1039
c	hr1 194619913 194620133 221 194620012 17.00 8.20573 4.37716 5	.38658 E11.5_MANP_CHIP_G3BF_REP1_REP2_pooled_q0.01_peak_1040
c	hr1 194620232 194620397 166 194620317 14.00 5.73077 3.51808 3	.09497 E11.5_MANP_CHIP_G3BF_REP1_REP2_pooled_q0.01_peak_1041
c	hr1 194700493 194700706 214 194700567 24.00 13.70739 5.86346	10.56365 E11.5_MANP_CHIP_G3BF_REP1_REP2_pooled_q0.01_peak_1042
c	hr1 194976431 194976669 239 194976552 18.00 10.10829 5.19243	7.14298 E11.5_MANP_CHIP_G3BF_REP1_REP2_pooled_q0.01_peak_1043
c	hr1 195130941 195131358 418 195131104 20.00 11.69725 5.64027	8.66180 E11.5_MANP_CHIP_G3BF_REP1_REP2_pooled_q0.01_peak_1044
c	hr1 195241546 195241774 229 195241718 68.00 10.70486 2.42829	7.72339 E11.5_MANP_CHIP_G3BF_REP1_REP2_pooled_q0.01_peak_1045
c	hr1 195371677 195372003 327 195371834 104.00 9.20545 1.90296	6.32841 E11.5_MANP_CHIP_G3BF_REP1_REP2_pooled_q0.01_peak_1046
c	hr10 3109426 3110485 1060 3109653 49.00 44.37739 13.66430 40.	23867 E11.5_MANP_CHIP_G3BF_REP1_REP2_pooled_q0.01_peak_1047a
c	hr10 3109426 3110485 1060 3110038 81.00 88.98854 22.40945 84.	24165 E11.5_MANP_CHIP_G3BF_REP1_REP2_pooled_q0.01_peak_1047b
c	hr10 3109426 3110485 1060 3110334 59.00 57.57091 16.39716 53.	19894 E11.5_MANP_CHIP_G3BF_REP1_REP2_pooled_q0.01_peak_1047c
c	hr10 3111279 3114031 2753 3111434 40.00 33.23634 11.20473 29.	35288 E11.5_MANP_CHIP_G3BF_REP1_REP2_pooled_q0.01_peak_1048a
c	hr10 3111279 3114031 2753 3111634 52.00 48.25232 14.48416 44.	03549 E11.5_MANP_CHIP_G3BF_REP1_REP2_pooled_q0.01_peak_1048b
c	hr10 3111279 3114031 2753 3111962 43.00 36.86421 12.02458 32.	89013 E11.5_MANP_CHIP_G3BF_REP1_REP2_pooled_q0.01_peak_1048c
c	hr10 3111279 3114031 2753 3112416 36.00 28.54655 10.11158 24.	80025 E11.5_MANP_CHIP_G3BF_REP1_REP2_pooled_q0.01_peak_1048d
c	hr10 3111279 3114031 2753 3112862 80.00 87.49931 22.13616 82.	76656 E11.5_MANP_CHIP_G3BF_REP1_REP2_pooled_q0.01_peak_1048e
c	hr10 3111279 3114031 2753 3113403 55.00 52.20021 15.30401 47.	91404 E11.5_MANP_CHIP_G3BF_REP1_REP2_pooled_q0.01_peak_1048f
c	hr10 3111279 3114031 2753 3113838 85.00 94.99750 23.50259 90.	19088 E11.5_MANP_CHIP_G3BF_REP1_REP2_pooled_q0.01_peak_1048g
c	hr10 3114153 3115344 1192 3114284 40.00 33.23634 11.20473 29.	35288 E11.5_MANP_CHIP_G3BF_REP1_REP2_pooled_q0.01_peak_1049a
c	hr10 3114153 3115344 1192 3114592 50.00 45.66067 13.93758 41.	49469 E11.5_MANP_CHIP_G3BF_REP1_REP2_pooled_q0.01_peak_1049b
c	hr10 3114153 3115344 1192 3114951 75.00 80.13430 20.76973 75.	47377 E11.5_MANP_CHIP_G3BF_REP1_REP2_pooled_q0.01_peak_1049c
c	hr10 3114153 3115344 1192 3115220 42.00 35.64489 11.75130 31.	70040 E11.5_MANP_CHIP_G3BF_REP1_REP2_pooled_q0.01_peak_1049d
c	hr10 3116041 3117202 1162 3116236 42.00 35.64489 11.75130 31.	70040 E11.5_MANP_CHIP_G3BF_REP1_REP2_pooled_q0.01_peak_1050a
c	hr10 3116041 3117202 1162 3116459 48.00 43.10269 13.39101 38.	99024 E11.5_MANP_CHIP_G3BF_REP1_REP2_pooled_q0.01_peak_1050b
c	hr10 3116041 3117202 1162 3116654 57.00 54.87074 15.85059 50.	54016 E11.5_MANP_CHIP_G3BF_REP1_REP2_pooled_q0.01_peak_1050c
c	hr10 3116041 3117202 1162 3117040 43.00 36.86421 12.02458 32.	89013 E11.5_MANP_CHIP_G3BF_REP1_REP2_pooled_q0.01_peak_1050d
c	hr10 3740329 3740510 182 3740405 14.00 6.82220 4.09929 4.0768	3 E11.5_MANP_CHIP_G3BF_REP1_REP2_pooled_q0.01_peak_1051
c	hr10 3740702 3741271 570 3740787 12.00 5.33746 3.55272 2.7163	4 E11.5_MANP_CHIP_G3BF_REP1_REP2_pooled_q0.01_peak_1052
c	hr10 3973346 3973616 271 3973506 15.00 7.60646 4.37258 4.8047	2 E11.5_MANP_CHIP_G3BF_REP1_REP2_pooled_q0.01_peak_1053
c	hr10 4210438 4210841 404 4210638 34.00 18.84559 6.28460 15.44	345 E11.5_MANP_CHIP_G3BF_REP1_REP2_pooled_q0.01_peak_1054
c	hr10 4210943 4211116 174 4211038 16.00 8.41648 4.64586 5.5590	4 E11.5_MANP_CHIP_G3BF_REP1_REP2_pooled_q0.01_peak_1055
c	hr10 4387138 4387553 416 4387359 45.00 39.33184 12.57115 35.3	0061 E11.5_MANP_CHIP_G3BF_REP1_REP2_pooled_q0.01_peak_1056
c	hr10 4387694 4388393 700 4387788 20.00 11.88794 5.73901 8.819	22 E11.5_MANP_CHIP_G3BF_REP1_REP2_pooled_q0.01_peak_1057
c	hr10 4432114 4432274 161 4432190 14.00 6.82220 4.09929 4.0768	3 E11.5_MANP_CHIP_G3BF_REP1_REP2_pooled_q0.01_peak_1058
c	hr10 4432544 4433143 600 4432738 20.00 11.88794 5.73901 8.819	22 E11.5_MANP_CHIP_G3BF_REP1_REP2_pooled_q0.01_peak_1059a
c	hr10 4432544 4433143 600 4432888 14.00 6.82220 4.09929 4.0768	3 E11.5_MANP_CHIP_G3BF_REP1_REP2_pooled_q0.01_peak_1059b
c	hr10 5070953 5071129 177 5071029 16.00 8.41648 4.64586 5.5590	4 E11.5_MANP_CHIP_G3BF_REP1_REP2_pooled_q0.01_peak_1060
c	hr10 5697589 5697778 190 5697660 13.00 6.06527 3.82600 3.3815	3 E11.5_MANP_CHIP_G3BF_REP1_REP2_pooled_q0.01_peak_1061
c	hr10 5804807 5805424 618 5804880 17.00 9.25085 4.91915 6.3385	9 E11.5_MANP_CHIP_G3BF_REP1_REP2_pooled_q0.01_peak_1062a
c	hr10 5804807 5805424 618 5805103 19.00 9.45664 4.69077 6.5359	6 E11.5_MANP_CHIP_G3BF_REP1_REP2_pooled_q0.01_peak_1062b
c	hr10 5805750 5805935 186 5805850 16.00 7.14960 3.98715 4.3933	0 E11.5_MANP_CHIP_G3BF_REP1_REP2_pooled_q0.01_peak_1063
c	hr10 5806097 5806249 153 5806179 16.00 8.41648 4.64586 5.5590	4 E11.5_MANP_CHIP_G3BF_REP1_REP2_pooled_q0.01_peak_1064
c	hr10 5823286 5824227 942 5823419 28.00 19.74358 7.92529 16.30	083 E11.5_MANP_CHIP_G3BF_REP1_REP2_pooled_q0.01_peak_1065a
c	hr10 5823286 5824227 942 5823851 47.00 37.82338 11.25785 33.8	3892 E11.5_MANP_CHIP_G3BF_REP1_REP2_pooled_q0.01_peak_1065b
c	hr10 6788817 6788983 167 6788887 23.00 11.19078 4.88159 8.162	44 E11.5_MANP_CHIP_G3BF_REP1_REP2_pooled_q0.01_peak_1066
c	hr10 6867503 6867727 225 6867601 20.00 10.26867 4.92531 7.296	11 E11.5_MANP_CHIP_G3BF_REP1_REP2_pooled_q0.01_peak_1067
c	hr10 7210967 7211727 761 7211032 14.00 5.73077 3.51808 3.0949	7 E11.5_MANP_CHIP_G3BF_REP1_REP2_pooled_q0.01_peak_1068a
c	hr10 7210967 7211727 761 7211275 16.00 8.41648 4.64586 5.5590	4 E11.5_MANP_CHIP_G3BF_REP1_REP2_pooled_q0.01_peak_1068b
c	hr10 7212038 7212255 218 7212106 13.00 5.06128 3.28354 2.4903	8 E11.5_MANP_CHIP_G3BF_REP1_REP2_pooled_q0.01_peak_1069
c	hr10 7589589 7589984 396 7589831 16.00 8.41648 4.64586 5.5590	4 E11.5_MANP_CHIP_G3BF_REP1_REP2_pooled_q0.01_peak_1070
c	hr10 7662716 7663285 570 7662945 18.00 8.66541 4.45623 5.7986	6 E11.5_MANP_CHIP_G3BF_REP1_REP2_pooled_q0.01_peak_1071
c	hr10 7663358 7663820 463 7663436 14.00 6.82220 4.09929 4.0768	3 E11.5_MANP_CHIP_G3BF_REP1_REP2_pooled_q0.01_peak_1072
c	hr10 7680871 7681946 1076 7681052 33.00 22.37907 7.97431 18.8	4602 E11.5_MANP_CHIP_G3BF_REP1_REP2_pooled_q0.01_peak_1073a
c	hr10 7680871 7681946 1076 7681330 40.00 33.23634 11.20473 29.	35288 E11.5_MANP_CHIP_G3BF_REP1_REP2_pooled_q0.01_peak_1073b
c	hr10 7680871 7681946 1076 7681540 49.00 44.37739 13.66430 40.	23867 E11.5_MANP_CHIP_G3BF_REP1_REP2_pooled_q0.01_peak_1073c
c	hr10 7680871 7681946 1076 7681712 38.00 24.84312 7.93259 21.2	2897 E11.5_MANP_CHIP_G3BF_REP1_REP2_pooled_q0.01_peak_1073d
c	hr10 7726051 7726210 160 7726122 16.00 6.06792 3.45779 3.3815	3 E11.5_MANP_CHIP_G3BF_REP1_REP2_pooled_q0.01_peak_1074
c	hr10 7780531 7780946 416 7780777 27.00 16.46606 6.56708 13.18	194 E11.5_MANP_CHIP_G3BF_REP1_REP2_pooled_q0.01_peak_1075
c	hr10 7792502 7793121 620 7792735 40.00 33.23634 11.20473 29.3	5288 E11.5_MANP_CHIP_G3BF_REP1_REP2_pooled_q0.01_peak_1076a
c	hr10 7792502 7793121 620 7793019 17.00 9.25085 4.91915 6.3385	9 E11.5_MANP_CHIP_G3BF_REP1_REP2_pooled_q0.01_peak_1076b
c	hr10 7955392 7956963 1572 7955484 15.00 7.60646 4.37258 4.804	72 E11.5_MANP_CHIP_G3BF_REP1_REP2_pooled_q0.01_peak_1077a
c	hr10 7955392 7956963 1572 7955912 31.00 22.94677 8.74515 19.3	8261 E11.5_MANP_CHIP_G3BF_REP1_REP2_pooled_q0.01_peak_1077b
c	hr10 7955392 7956963 1572 7956529 51.00 46.95237 14.21087 42.	76136 E11.5_MANP_CHIP_G3BF_REP1_REP2_pooled_q0.01_peak_1077c
c	hr10 8518263 8518971 709 8518361 16.00 6.06792 3.45779 3.3815	3 E11.5_MANP_CHIP_G3BF_REP1_REP2_pooled_q0.01_peak_1078a
c	hr10 8518263 8518971 709 8518732 30.00 19.36089 7.27069 15.94	879 E11.5_MANP_CHIP_G3BF_REP1_REP2_pooled_q0.01_peak_1078b
c	hr10 8813997 8814294 298 8814137 37.00 29.33666 10.20621 25.5	7937 E11.5_MANP_CHIP_G3BF_REP1_REP2_pooled_q0.01_peak_1079
c	hr10 8885719 8886253 535 8886045 26.00 15.53067 6.33254 12.29	179 E11.5_MANP_CHIP_G3BF_REP1_REP2_pooled_q0.01_peak_1080
c	hr10 8886356 8886589 234 8886440 16.00 7.14960 3.98715 4.3933	0 E11.5_MANP_CHIP_G3BF_REP1_REP2_pooled_q0.01_peak_1081
c	hr10 9900965 9901187 223 9901076 27.00 18.70449 7.65201 15.30	417 E11.5_MANP_CHIP_G3BF_REP1_REP2_pooled_q0.01_peak_1082
c	hr10 10355730 10356045 316 10355892 25.00 16.67223 7.10544 13	.35840 E11.5_MANP_CHIP_G3BF_REP1_REP2_pooled_q0.01_peak_1083
c	hr10 11081576 11081738 163 11081654 19.00 10.98767 5.46572 7.	97026 E11.5_MANP_CHIP_G3BF_REP1_REP2_pooled_q0.01_peak_1084
c	hr10 11149376 11149920 545 11149631 27.00 18.70449 7.65201 15	.30417 E11.5_MANP_CHIP_G3BF_REP1_REP2_pooled_q0.01_peak_1085
c	hr10 11280451 11282354 1904 11280649 43.00 36.86421 12.02458	32.89013 E11.5_MANP_CHIP_G3BF_REP1_REP2_pooled_q0.01_peak_1086a
c	hr10 11280451 11282354 1904 11280904 29.00 20.79730 8.19858 1	7.31392 E11.5_MANP_CHIP_G3BF_REP1_REP2_pooled_q0.01_peak_1086b
c	hr10 11280451 11282354 1904 11281130 23.00 14.70505 6.55886 1	1.48259 E11.5_MANP_CHIP_G3BF_REP1_REP2_pooled_q0.01_peak_1086c
c	hr10 11280451 11282354 1904 11281419 45.00 39.33184 12.57115	35.30061 E11.5_MANP_CHIP_G3BF_REP1_REP2_pooled_q0.01_peak_1086d
c	hr10 11280451 11282354 1904 11281705 36.00 28.54655 10.11158	24.80025 E11.5_MANP_CHIP_G3BF_REP1_REP2_pooled_q0.01_peak_1086e
c	hr10 11280451 11282354 1904 11282131 20.00 10.26867 4.92531 7	.29611 E11.5_MANP_CHIP_G3BF_REP1_REP2_pooled_q0.01_peak_1086f
c	hr10 11318022 11318181 160 11318095 12.00 5.33746 3.55272 2.7	1634 E11.5_MANP_CHIP_G3BF_REP1_REP2_pooled_q0.01_peak_1087
c	hr10 11343233 11344025 793 11343472 25.00 16.67223 7.10544 13	.35840 E11.5_MANP_CHIP_G3BF_REP1_REP2_pooled_q0.01_peak_1088a
c	hr10 11343233 11344025 793 11343674 27.00 18.70449 7.65201 15	.30417 E11.5_MANP_CHIP_G3BF_REP1_REP2_pooled_q0.01_peak_1088b
c	hr10 12106919 12107112 194 12107029 21.00 12.80816 6.01229 9.	68985 E11.5_MANP_CHIP_G3BF_REP1_REP2_pooled_q0.01_peak_1089
c	hr10 12759816 12759989 174 12759895 21.00 12.80816 6.01229 9.	68985 E11.5_MANP_CHIP_G3BF_REP1_REP2_pooled_q0.01_peak_1090
c	hr10 12846770 12847077 308 12846862 27.00 18.70449 7.65201 15	.30417 E11.5_MANP_CHIP_G3BF_REP1_REP2_pooled_q0.01_peak_1091
c	hr10 12868855 12869505 651 12868964 22.00 13.74746 6.28558 10	.57194 E11.5_MANP_CHIP_G3BF_REP1_REP2_pooled_q0.01_peak_1092a
c	hr10 12868855 12869505 651 12869357 17.00 9.25085 4.91915 6.3	3859 E11.5_MANP_CHIP_G3BF_REP1_REP2_pooled_q0.01_peak_1092b
c	hr10 12915888 12916165 278 12916061 21.00 12.80816 6.01229 9.	68985 E11.5_MANP_CHIP_G3BF_REP1_REP2_pooled_q0.01_peak_1093
c	hr10 12922511 12923030 520 12922654 26.00 17.68052 7.37872 14	.32329 E11.5_MANP_CHIP_G3BF_REP1_REP2_pooled_q0.01_peak_1094a
c	hr10 12922511 12923030 520 12922869 22.00 13.74746 6.28558 10	.57194 E11.5_MANP_CHIP_G3BF_REP1_REP2_pooled_q0.01_peak_1094b
c	hr10 12964124 12964650 527 12964509 28.00 19.74358 7.92529 16	.30083 E11.5_MANP_CHIP_G3BF_REP1_REP2_pooled_q0.01_peak_1095
c	hr10 13111613 13111804 192 13111727 16.00 8.41648 4.64586 5.5	5904 E11.5_MANP_CHIP_G3BF_REP1_REP2_pooled_q0.01_peak_1096
c	hr10 13117315 13117656 342 13117450 21.00 12.31210 5.75843 9.	22969 E11.5_MANP_CHIP_G3BF_REP1_REP2_pooled_q0.01_peak_1097
c	hr10 13323914 13324233 320 13324063 15.00 7.60646 4.37258 4.8	0472 E11.5_MANP_CHIP_G3BF_REP1_REP2_pooled_q0.01_peak_1098
c	hr10 13553104 13553317 214 13553225 24.00 13.70739 5.86346 10	.56365 E11.5_MANP_CHIP_G3BF_REP1_REP2_pooled_q0.01_peak_1099
c	hr10 13713219 13713427 209 13713320 25.00 12.82373 5.28839 9.	69685 E11.5_MANP_CHIP_G3BF_REP1_REP2_pooled_q0.01_peak_1100
c	hr10 13845234 13845446 213 13845326 19.00 10.98767 5.46572 7.	97026 E11.5_MANP_CHIP_G3BF_REP1_REP2_pooled_q0.01_peak_1101
c	hr10 13964965 13965353 389 13965082 23.00 14.70505 6.55886 11	.48259 E11.5_MANP_CHIP_G3BF_REP1_REP2_pooled_q0.01_peak_1102
c	hr10 13965522 13966310 789 13965687 24.00 15.68020 6.83215 12	.41189 E11.5_MANP_CHIP_G3BF_REP1_REP2_pooled_q0.01_peak_1103a
c	hr10 13965522 13966310 789 13965953 14.00 6.82220 4.09929 4.0	7683 E11.5_MANP_CHIP_G3BF_REP1_REP2_pooled_q0.01_peak_1103b
c	hr10 13966586 13966824 239 13966740 15.00 7.60646 4.37258 4.8	0472 E11.5_MANP_CHIP_G3BF_REP1_REP2_pooled_q0.01_peak_1104
c	hr10 13966935 13967520 586 13967023 20.00 11.88794 5.73901 8.	81922 E11.5_MANP_CHIP_G3BF_REP1_REP2_pooled_q0.01_peak_1105a
c	hr10 13966935 13967520 586 13967268 18.00 7.42758 3.86459 4.6	6513 E11.5_MANP_CHIP_G3BF_REP1_REP2_pooled_q0.01_peak_1105b
c	hr10 14041075 14041394 320 14041217 44.00 38.09327 12.29787 3	4.09045 E11.5_MANP_CHIP_G3BF_REP1_REP2_pooled_q0.01_peak_1106
c	hr10 14210287 14210588 302 14210422 23.00 8.73201 3.85734 5.8	6461 E11.5_MANP_CHIP_G3BF_REP1_REP2_pooled_q0.01_peak_1107
c	hr10 14705154 14705561 408 14705341 20.00 10.26867 4.92531 7.	29611 E11.5_MANP_CHIP_G3BF_REP1_REP2_pooled_q0.01_peak_1108
c	hr10 14760224 14760448 225 14760346 16.00 8.41648 4.64586 5.5	5904 E11.5_MANP_CHIP_G3BF_REP1_REP2_pooled_q0.01_peak_1109
c	hr10 15300226 15300467 242 15300341 18.00 10.10829 5.19243 7.	14298 E11.5_MANP_CHIP_G3BF_REP1_REP2_pooled_q0.01_peak_1110
c	hr10 17074649 17074979 331 17074805 31.00 20.35381 7.50523 16	.90069 E11.5_MANP_CHIP_G3BF_REP1_REP2_pooled_q0.01_peak_1111
c	hr10 17722419 17722577 159 17722493 14.00 6.82220 4.09929 4.0	7683 E11.5_MANP_CHIP_G3BF_REP1_REP2_pooled_q0.01_peak_1112
c	hr10 17722868 17724022 1155 17723170 30.00 21.86518 8.47186 1	8.34202 E11.5_MANP_CHIP_G3BF_REP1_REP2_pooled_q0.01_peak_1113a
c	hr10 17722868 17724022 1155 17723499 23.00 14.70505 6.55886 1	1.48259 E11.5_MANP_CHIP_G3BF_REP1_REP2_pooled_q0.01_peak_1113b
c	hr10 17722868 17724022 1155 17723747 18.00 8.66541 4.45623 5.	79866 E11.5_MANP_CHIP_G3BF_REP1_REP2_pooled_q0.01_peak_1113c
c	hr10 17724190 17724700 511 17724281 16.00 8.04724 4.44970 5.2	3277 E11.5_MANP_CHIP_G3BF_REP1_REP2_pooled_q0.01_peak_1114a
c	hr10 17724190 17724700 511 17724488 27.00 12.91910 5.02768 9.	79080 E11.5_MANP_CHIP_G3BF_REP1_REP2_pooled_q0.01_peak_1114b
c	hr10 17947104 17947498 395 17947422 14.00 6.82220 4.09929 4.0	7683 E11.5_MANP_CHIP_G3BF_REP1_REP2_pooled_q0.01_peak_1115
c	hr10 18022110 18023249 1140 18022376 24.00 15.68020 6.83215 1	2.41189 E11.5_MANP_CHIP_G3BF_REP1_REP2_pooled_q0.01_peak_1116a
c	hr10 18022110 18023249 1140 18022673 19.00 10.98767 5.46572 7	.97026 E11.5_MANP_CHIP_G3BF_REP1_REP2_pooled_q0.01_peak_1116b
c	hr10 18022110 18023249 1140 18022968 22.00 11.95153 5.39439 8	.87686 E11.5_MANP_CHIP_G3BF_REP1_REP2_pooled_q0.01_peak_1116c
c	hr10 18055312 18056493 1182 18055382 11.00 4.64076 3.27943 2.	08535 E11.5_MANP_CHIP_G3BF_REP1_REP2_pooled_q0.01_peak_1117a
c	hr10 18055312 18056493 1182 18055559 15.00 7.60646 4.37258 4.	80472 E11.5_MANP_CHIP_G3BF_REP1_REP2_pooled_q0.01_peak_1117b
c	hr10 18055312 18056493 1182 18055724 18.00 8.66541 4.45623 5.	79866 E11.5_MANP_CHIP_G3BF_REP1_REP2_pooled_q0.01_peak_1117c
c	hr10 18055312 18056493 1182 18056192 23.00 14.70505 6.55886 1	1.48259 E11.5_MANP_CHIP_G3BF_REP1_REP2_pooled_q0.01_peak_1117d
c	hr10 18318514 18319398 885 18318623 23.00 11.19078 4.88159 8.	16244 E11.5_MANP_CHIP_G3BF_REP1_REP2_pooled_q0.01_peak_1118a
c	hr10 18318514 18319398 885 18318925 28.00 19.74358 7.92529 16	.30083 E11.5_MANP_CHIP_G3BF_REP1_REP2_pooled_q0.01_peak_1118b
c	hr10 18318514 18319398 885 18319203 33.00 25.14942 9.29172 21	.51036 E11.5_MANP_CHIP_G3BF_REP1_REP2_pooled_q0.01_peak_1118c
c	hr10 18407702 18407886 185 18407791 14.00 6.82220 4.09929 4.0	7683 E11.5_MANP_CHIP_G3BF_REP1_REP2_pooled_q0.01_peak_1119
c	hr10 18545842 18546011 170 18545931 14.00 6.82220 4.09929 4.0	7683 E11.5_MANP_CHIP_G3BF_REP1_REP2_pooled_q0.01_peak_1120
c	hr10 18845089 18845291 203 18845165 15.00 7.60646 4.37258 4.8	0472 E11.5_MANP_CHIP_G3BF_REP1_REP2_pooled_q0.01_peak_1121
c	hr10 19591942 19592328 387 19592102 21.00 12.80816 6.01229 9.	68985 E11.5_MANP_CHIP_G3BF_REP1_REP2_pooled_q0.01_peak_1122
c	hr10 19907352 19907776 425 19907541 44.00 38.09327 12.29787 3	4.09045 E11.5_MANP_CHIP_G3BF_REP1_REP2_pooled_q0.01_peak_1123
c	hr10 19933810 19934316 507 19934153 33.00 22.37907 7.97431 18	.84602 E11.5_MANP_CHIP_G3BF_REP1_REP2_pooled_q0.01_peak_1124
c	hr10 19934539 19934988 450 19934624 14.00 5.73077 3.51808 3.0	9497 E11.5_MANP_CHIP_G3BF_REP1_REP2_pooled_q0.01_peak_1125a
c	hr10 19934539 19934988 450 19934915 14.00 5.73077 3.51808 3.0	9497 E11.5_MANP_CHIP_G3BF_REP1_REP2_pooled_q0.01_peak_1125b
c	hr10 20073308 20073474 167 20073387 21.00 11.10059 5.15985 8.	07674 E11.5_MANP_CHIP_G3BF_REP1_REP2_pooled_q0.01_peak_1126
c	hr10 20185407 20185556 150 20185485 17.00 9.25085 4.91915 6.3	3859 E11.5_MANP_CHIP_G3BF_REP1_REP2_pooled_q0.01_peak_1127
c	hr10 20311911 20312346 436 20312137 22.00 13.74746 6.28558 10	.57194 E11.5_MANP_CHIP_G3BF_REP1_REP2_pooled_q0.01_peak_1128
c	hr10 20312428 20313565 1138 20312632 41.00 30.95509 9.85062 2	7.13732 E11.5_MANP_CHIP_G3BF_REP1_REP2_pooled_q0.01_peak_1129a
c	hr10 20312428 20313565 1138 20313039 28.00 15.39316 5.89859 1	2.16241 E11.5_MANP_CHIP_G3BF_REP1_REP2_pooled_q0.01_peak_1129b
c	hr10 20312428 20313565 1138 20313466 13.00 6.06527 3.82600 3.	38153 E11.5_MANP_CHIP_G3BF_REP1_REP2_pooled_q0.01_peak_1129c
c	hr10 20347800 20348000 201 20347899 20.00 11.88794 5.73901 8.	81922 E11.5_MANP_CHIP_G3BF_REP1_REP2_pooled_q0.01_peak_1130
c	hr10 20951977 20952487 511 20952391 14.00 6.82220 4.09929 4.0	7683 E11.5_MANP_CHIP_G3BF_REP1_REP2_pooled_q0.01_peak_1131
c	hr10 21145246 21145396 151 21145314 13.00 6.06527 3.82600 3.3	8153 E11.5_MANP_CHIP_G3BF_REP1_REP2_pooled_q0.01_peak_1132
c	hr10 21160672 21161048 377 21160829 24.00 15.68020 6.83215 12	.41189 E11.5_MANP_CHIP_G3BF_REP1_REP2_pooled_q0.01_peak_1133
c	hr10 21161232 21161785 554 21161310 15.00 7.60646 4.37258 4.8	0472 E11.5_MANP_CHIP_G3BF_REP1_REP2_pooled_q0.01_peak_1134a
c	hr10 21161232 21161785 554 21161649 31.00 22.94677 8.74515 19	.38261 E11.5_MANP_CHIP_G3BF_REP1_REP2_pooled_q0.01_peak_1134b
c	hr10 21296057 21296486 430 21296109 15.00 7.60646 4.37258 4.8	0472 E11.5_MANP_CHIP_G3BF_REP1_REP2_pooled_q0.01_peak_1135a
c	hr10 21296057 21296486 430 21296350 17.00 9.25085 4.91915 6.3	3859 E11.5_MANP_CHIP_G3BF_REP1_REP2_pooled_q0.01_peak_1135b
c	hr10 21669045 21669375 331 21669192 38.00 30.86952 10.65815 2	7.05543 E11.5_MANP_CHIP_G3BF_REP1_REP2_pooled_q0.01_peak_1136
c	hr10 21829190 21829427 238 21829332 14.00 6.82220 4.09929 4.0	7683 E11.5_MANP_CHIP_G3BF_REP1_REP2_pooled_q0.01_peak_1137
c	hr10 21937300 21937510 211 21937370 13.00 6.06527 3.82600 3.3	8153 E11.5_MANP_CHIP_G3BF_REP1_REP2_pooled_q0.01_peak_1138
c	hr10 21994110 21994317 208 21994207 14.00 6.82220 4.09929 4.0	7683 E11.5_MANP_CHIP_G3BF_REP1_REP2_pooled_q0.01_peak_1139
c	hr10 22058456 22058654 199 22058571 13.00 6.06527 3.82600 3.3	8153 E11.5_MANP_CHIP_G3BF_REP1_REP2_pooled_q0.01_peak_1140
c	hr10 22148446 22148930 485 22148687 22.00 13.74746 6.28558 10	.57194 E11.5_MANP_CHIP_G3BF_REP1_REP2_pooled_q0.01_peak_1141
c	hr10 22273951 22274166 216 22274060 26.00 9.72455 3.92748 6.7	9835 E11.5_MANP_CHIP_G3BF_REP1_REP2_pooled_q0.01_peak_1142
c	hr10 22644952 22645346 395 22645096 17.00 9.25085 4.91915 6.3	3859 E11.5_MANP_CHIP_G3BF_REP1_REP2_pooled_q0.01_peak_1143
c	hr10 22730703 22731979 1277 22730840 20.00 11.88794 5.73901 8	.81922 E11.5_MANP_CHIP_G3BF_REP1_REP2_pooled_q0.01_peak_1144a
c	hr10 22730703 22731979 1277 22731034 23.00 14.70505 6.55886 1	1.48259 E11.5_MANP_CHIP_G3BF_REP1_REP2_pooled_q0.01_peak_1144b
c	hr10 22730703 22731979 1277 22731269 24.00 13.70739 5.86346 1	0.56365 E11.5_MANP_CHIP_G3BF_REP1_REP2_pooled_q0.01_peak_1144c
c	hr10 22730703 22731979 1277 22731627 18.00 7.42758 3.86459 4.	66513 E11.5_MANP_CHIP_G3BF_REP1_REP2_pooled_q0.01_peak_1144d
c	hr10 23349213 23349423 211 23349305 14.00 6.82220 4.09929 4.0	7683 E11.5_MANP_CHIP_G3BF_REP1_REP2_pooled_q0.01_peak_1145
c	hr10 23349959 23350606 648 23350023 14.00 6.82220 4.09929 4.0	7683 E11.5_MANP_CHIP_G3BF_REP1_REP2_pooled_q0.01_peak_1146a
c	hr10 23349959 23350606 648 23350420 22.00 13.74746 6.28558 10	.57194 E11.5_MANP_CHIP_G3BF_REP1_REP2_pooled_q0.01_peak_1146b
c	hr10 23562343 23562750 408 23562533 48.00 27.60120 7.12764 23	.88945 E11.5_MANP_CHIP_G3BF_REP1_REP2_pooled_q0.01_peak_1147
c	hr10 23711977 23712130 154 23712044 16.00 7.14960 3.98715 4.3	9330 E11.5_MANP_CHIP_G3BF_REP1_REP2_pooled_q0.01_peak_1148
c	hr10 23741958 23742284 327 23742117 44.00 38.09327 12.29787 3	4.09045 E11.5_MANP_CHIP_G3BF_REP1_REP2_pooled_q0.01_peak_1149
c	hr10 23786612 23787441 830 23786734 19.00 7.06863 3.59120 4.3	1928 E11.5_MANP_CHIP_G3BF_REP1_REP2_pooled_q0.01_peak_1150a
c	hr10 23786612 23787441 830 23787115 25.00 16.67223 7.10544 13	.35840 E11.5_MANP_CHIP_G3BF_REP1_REP2_pooled_q0.01_peak_1150b
c	hr10 23806253 23806518 266 23806323 14.00 6.82220 4.09929 4.0	7683 E11.5_MANP_CHIP_G3BF_REP1_REP2_pooled_q0.01_peak_1151
c	hr10 23898512 23898851 340 23898699 32.00 21.36000 7.73977 17	.86647 E11.5_MANP_CHIP_G3BF_REP1_REP2_pooled_q0.01_peak_1152
c	hr10 24222088 24222265 178 24222172 15.00 7.60646 4.37258 4.8	0472 E11.5_MANP_CHIP_G3BF_REP1_REP2_pooled_q0.01_peak_1153
c	hr10 24298594 24298806 213 24298719 14.00 6.82220 4.09929 4.0	7683 E11.5_MANP_CHIP_G3BF_REP1_REP2_pooled_q0.01_peak_1154
c	hr10 24340539 24340706 168 24340677 18.00 8.66541 4.45623 5.7	9866 E11.5_MANP_CHIP_G3BF_REP1_REP2_pooled_q0.01_peak_1155
c	hr10 24482172 24482393 222 24482376 13.00 6.06527 3.82600 3.3	8153 E11.5_MANP_CHIP_G3BF_REP1_REP2_pooled_q0.01_peak_1156
c	hr10 24595529 24595844 316 24595648 27.00 18.70449 7.65201 15	.30417 E11.5_MANP_CHIP_G3BF_REP1_REP2_pooled_q0.01_peak_1157
c	hr10 24712072 24712352 281 24712124 11.00 4.54195 3.22301 2.0	3764 E11.5_MANP_CHIP_G3BF_REP1_REP2_pooled_q0.01_peak_1158
c	hr10 24869837 24870026 190 24869917 19.00 10.98767 5.46572 7.	97026 E11.5_MANP_CHIP_G3BF_REP1_REP2_pooled_q0.01_peak_1159
c	hr10 24870123 24870388 266 24870192 14.00 6.82220 4.09929 4.0	7683 E11.5_MANP_CHIP_G3BF_REP1_REP2_pooled_q0.01_peak_1160
c	hr10 25297067 25297299 233 25297185 18.00 10.10829 5.19243 7.	14298 E11.5_MANP_CHIP_G3BF_REP1_REP2_pooled_q0.01_peak_1161
c	hr10 25359618 25359766 149 25359708 12.00 5.33746 3.55272 2.7	1634 E11.5_MANP_CHIP_G3BF_REP1_REP2_pooled_q0.01_peak_1162
c	hr10 25359852 25360276 425 25359961 21.00 9.62773 4.47479 6.7	0316 E11.5_MANP_CHIP_G3BF_REP1_REP2_pooled_q0.01_peak_1163
c	hr10 25411703 25412139 437 25411965 23.00 14.15814 6.28193 10	.97878 E11.5_MANP_CHIP_G3BF_REP1_REP2_pooled_q0.01_peak_1164
c	hr10 25437064 25437471 408 25437190 19.00 10.98767 5.46572 7.	97026 E11.5_MANP_CHIP_G3BF_REP1_REP2_pooled_q0.01_peak_1165a
c	hr10 25437064 25437471 408 25437385 16.00 8.41648 4.64586 5.5	5904 E11.5_MANP_CHIP_G3BF_REP1_REP2_pooled_q0.01_peak_1165b
c	hr10 26082200 26082348 149 26082273 21.00 12.80816 6.01229 9.	68985 E11.5_MANP_CHIP_G3BF_REP1_REP2_pooled_q0.01_peak_1166
c	hr10 26107792 26107957 166 26107862 22.00 9.12981 4.12988 6.2	5313 E11.5_MANP_CHIP_G3BF_REP1_REP2_pooled_q0.01_peak_1167
c	hr10 26184985 26185188 204 26185112 15.00 7.60646 4.37258 4.8	0472 E11.5_MANP_CHIP_G3BF_REP1_REP2_pooled_q0.01_peak_1168
c	hr10 26280023 26280256 234 26280142 32.00 21.97726 8.02479 18	.45106 E11.5_MANP_CHIP_G3BF_REP1_REP2_pooled_q0.01_peak_1169
c	hr10 26373609 26375664 2056 26373956 20.00 10.26867 4.92531 7	.29611 E11.5_MANP_CHIP_G3BF_REP1_REP2_pooled_q0.01_peak_1170a
c	hr10 26373609 26375664 2056 26374285 27.00 14.52143 5.69519 1	1.33578 E11.5_MANP_CHIP_G3BF_REP1_REP2_pooled_q0.01_peak_1170b
c	hr10 26373609 26375664 2056 26374815 29.00 20.79730 8.19858 1	7.31392 E11.5_MANP_CHIP_G3BF_REP1_REP2_pooled_q0.01_peak_1170c
c	hr10 26373609 26375664 2056 26375055 29.00 20.79730 8.19858 1	7.31392 E11.5_MANP_CHIP_G3BF_REP1_REP2_pooled_q0.01_peak_1170d
c	hr10 26373609 26375664 2056 26375470 22.00 13.74746 6.28558 1	0.57194 E11.5_MANP_CHIP_G3BF_REP1_REP2_pooled_q0.01_peak_1170e
c	hr10 27499651 27499864 214 27499755 17.00 9.25085 4.91915 6.3	3859 E11.5_MANP_CHIP_G3BF_REP1_REP2_pooled_q0.01_peak_1171
c	hr10 27710600 27710876 277 27710704 16.00 7.14960 3.98715 4.3	9330 E11.5_MANP_CHIP_G3BF_REP1_REP2_pooled_q0.01_peak_1172
c	hr10 28074379 28074679 301 28074548 21.00 12.80816 6.01229 9.	68985 E11.5_MANP_CHIP_G3BF_REP1_REP2_pooled_q0.01_peak_1173
c	hr10 28074814 28075658 845 28074910 17.00 9.25085 4.91915 6.3	3859 E11.5_MANP_CHIP_G3BF_REP1_REP2_pooled_q0.01_peak_1174a
c	hr10 28074814 28075658 845 28075158 18.00 10.10829 5.19243 7.	14298 E11.5_MANP_CHIP_G3BF_REP1_REP2_pooled_q0.01_peak_1174b
c	hr10 28074814 28075658 845 28075373 24.00 15.68020 6.83215 12	.41189 E11.5_MANP_CHIP_G3BF_REP1_REP2_pooled_q0.01_peak_1174c
c	hr10 29146897 29147195 299 29147046 29.00 18.38166 7.03616 15	.01118 E11.5_MANP_CHIP_G3BF_REP1_REP2_pooled_q0.01_peak_1175
c	hr10 29313008 29313437 430 29313094 17.00 7.89603 4.22169 5.0	8356 E11.5_MANP_CHIP_G3BF_REP1_REP2_pooled_q0.01_peak_1176a
c	hr10 29313008 29313437 430 29313302 33.00 25.14942 9.29172 21	.51036 E11.5_MANP_CHIP_G3BF_REP1_REP2_pooled_q0.01_peak_1176b
c	hr10 29361408 29362056 649 29361622 32.00 24.04164 9.01844 20	.43975 E11.5_MANP_CHIP_G3BF_REP1_REP2_pooled_q0.01_peak_1177a
c	hr10 29361408 29362056 649 29361883 43.00 33.20617 10.31970 2	9.34463 E11.5_MANP_CHIP_G3BF_REP1_REP2_pooled_q0.01_peak_1177b
c	hr10 29362148 29362334 187 29362244 19.00 9.45664 4.69077 6.5	3596 E11.5_MANP_CHIP_G3BF_REP1_REP2_pooled_q0.01_peak_1178
c	hr10 29532928 29533076 149 29533000 16.00 8.41648 4.64586 5.5	5904 E11.5_MANP_CHIP_G3BF_REP1_REP2_pooled_q0.01_peak_1179
c	hr10 29535526 29535731 206 29535591 15.00 7.60646 4.37258 4.8	0472 E11.5_MANP_CHIP_G3BF_REP1_REP2_pooled_q0.01_peak_1180
c	hr10 30200041 30200563 523 30200125 20.00 11.88794 5.73901 8.	81922 E11.5_MANP_CHIP_G3BF_REP1_REP2_pooled_q0.01_peak_1181a
c	hr10 30200041 30200563 523 30200449 25.00 16.67223 7.10544 13	.35840 E11.5_MANP_CHIP_G3BF_REP1_REP2_pooled_q0.01_peak_1181b
c	hr10 30600464 30600682 219 30600548 16.00 8.41648 4.64586 5.5	5904 E11.5_MANP_CHIP_G3BF_REP1_REP2_pooled_q0.01_peak_1182
c	hr10 30600764 30600923 160 30600868 12.00 5.33746 3.55272 2.7	1634 E11.5_MANP_CHIP_G3BF_REP1_REP2_pooled_q0.01_peak_1183
c	hr10 30618240 30618526 287 30618366 25.00 11.35432 4.66856 8.	32383 E11.5_MANP_CHIP_G3BF_REP1_REP2_pooled_q0.01_peak_1184
c	hr10 30802562 30803494 933 30802772 21.00 12.80816 6.01229 9.	68985 E11.5_MANP_CHIP_G3BF_REP1_REP2_pooled_q0.01_peak_1185a
c	hr10 30802562 30803494 933 30803032 21.00 8.42360 3.95032 5.5	6468 E11.5_MANP_CHIP_G3BF_REP1_REP2_pooled_q0.01_peak_1185b
c	hr10 30802562 30803494 933 30803325 23.00 14.70505 6.55886 11	.48259 E11.5_MANP_CHIP_G3BF_REP1_REP2_pooled_q0.01_peak_1185c
c	hr10 30811063 30811311 249 30811168 19.00 10.98767 5.46572 7.	97026 E11.5_MANP_CHIP_G3BF_REP1_REP2_pooled_q0.01_peak_1186
c	hr10 31313412 31313831 420 31313517 27.00 14.52143 5.69519 11	.33578 E11.5_MANP_CHIP_G3BF_REP1_REP2_pooled_q0.01_peak_1187
c	hr10 31445283 31446105 823 31445747 100.00 108.93628 23.45144	104.01189 E11.5_MANP_CHIP_G3BF_REP1_REP2_pooled_q0.01_peak_1188
c	hr10 31608621 31609820 1200 31608712 19.00 10.98767 5.46572 7	.97026 E11.5_MANP_CHIP_G3BF_REP1_REP2_pooled_q0.01_peak_1189a
c	hr10 31608621 31609820 1200 31608926 22.00 13.22598 6.02018 1	0.09415 E11.5_MANP_CHIP_G3BF_REP1_REP2_pooled_q0.01_peak_1189b
c	hr10 31608621 31609820 1200 31609236 30.00 17.17986 6.30539 1	3.85869 E11.5_MANP_CHIP_G3BF_REP1_REP2_pooled_q0.01_peak_1189c
c	hr10 31608621 31609820 1200 31609543 25.00 16.67223 7.10544 1	3.35840 E11.5_MANP_CHIP_G3BF_REP1_REP2_pooled_q0.01_peak_1189d
c	hr10 33950873 33951224 352 33951090 30.00 21.86518 8.47186 18	.34202 E11.5_MANP_CHIP_G3BF_REP1_REP2_pooled_q0.01_peak_1190
c	hr10 34019157 34019856 700 34019463 21.00 11.10059 5.15985 8.	07674 E11.5_MANP_CHIP_G3BF_REP1_REP2_pooled_q0.01_peak_1191a
c	hr10 34019157 34019856 700 34019695 30.00 19.36089 7.27069 15	.94879 E11.5_MANP_CHIP_G3BF_REP1_REP2_pooled_q0.01_peak_1191b
c	hr10 34206791 34207800 1010 34206970 26.00 17.68052 7.37872 1	4.32329 E11.5_MANP_CHIP_G3BF_REP1_REP2_pooled_q0.01_peak_1192a
c	hr10 34206791 34207800 1010 34207428 25.00 14.61092 6.09800 1	1.41868 E11.5_MANP_CHIP_G3BF_REP1_REP2_pooled_q0.01_peak_1192b
c	hr10 34206791 34207800 1010 34207717 11.00 4.64076 3.27943 2.	08535 E11.5_MANP_CHIP_G3BF_REP1_REP2_pooled_q0.01_peak_1192c
c	hr10 34282169 34282986 818 34282313 25.00 11.35432 4.66856 8.	32383 E11.5_MANP_CHIP_G3BF_REP1_REP2_pooled_q0.01_peak_1193a
c	hr10 34282169 34282986 818 34282543 25.00 16.67223 7.10544 13	.35840 E11.5_MANP_CHIP_G3BF_REP1_REP2_pooled_q0.01_peak_1193b
c	hr10 34297392 34297671 280 34297534 18.00 10.10829 5.19243 7.	14298 E11.5_MANP_CHIP_G3BF_REP1_REP2_pooled_q0.01_peak_1194
c	hr10 36974007 36974265 259 36974160 26.00 17.68052 7.37872 14	.32329 E11.5_MANP_CHIP_G3BF_REP1_REP2_pooled_q0.01_peak_1195
c	hr10 36974386 36975191 806 36974633 38.00 29.94019 10.20813 2	6.15487 E11.5_MANP_CHIP_G3BF_REP1_REP2_pooled_q0.01_peak_1196a
c	hr10 36974386 36975191 806 36974853 38.00 30.86952 10.65815 2	7.05543 E11.5_MANP_CHIP_G3BF_REP1_REP2_pooled_q0.01_peak_1196b
c	hr10 37135973 37136666 694 37136154 16.00 5.19348 3.05252 2.6	1892 E11.5_MANP_CHIP_G3BF_REP1_REP2_pooled_q0.01_peak_1197a
c	hr10 37135973 37136666 694 37136407 15.00 6.42739 3.75262 3.7	2916 E11.5_MANP_CHIP_G3BF_REP1_REP2_pooled_q0.01_peak_1197b
c	hr10 37136760 37140212 3453 37136992 24.00 15.68020 6.83215 1	2.41189 E11.5_MANP_CHIP_G3BF_REP1_REP2_pooled_q0.01_peak_1198a
c	hr10 37136760 37140212 3453 37137352 34.00 26.26973 9.56501 2	2.59474 E11.5_MANP_CHIP_G3BF_REP1_REP2_pooled_q0.01_peak_1198b
c	hr10 37136760 37140212 3453 37137693 37.00 29.70242 10.38487	25.92228 E11.5_MANP_CHIP_G3BF_REP1_REP2_pooled_q0.01_peak_1198c
c	hr10 37136760 37140212 3453 37137956 25.00 16.67223 7.10544 1	3.35840 E11.5_MANP_CHIP_G3BF_REP1_REP2_pooled_q0.01_peak_1198d
c	hr10 37136760 37140212 3453 37138390 33.00 22.37907 7.97431 1	8.84602 E11.5_MANP_CHIP_G3BF_REP1_REP2_pooled_q0.01_peak_1198e
c	hr10 37136760 37140212 3453 37138785 20.00 11.88794 5.73901 8	.81922 E11.5_MANP_CHIP_G3BF_REP1_REP2_pooled_q0.01_peak_1198f
c	hr10 37136760 37140212 3453 37139735 14.00 6.82220 4.09929 4.	07683 E11.5_MANP_CHIP_G3BF_REP1_REP2_pooled_q0.01_peak_1198g
c	hr10 37136760 37140212 3453 37139952 23.00 14.70505 6.55886 1	1.48259 E11.5_MANP_CHIP_G3BF_REP1_REP2_pooled_q0.01_peak_1198h
c	hr10 37140290 37140449 160 37140376 15.00 7.60646 4.37258 4.8	0472 E11.5_MANP_CHIP_G3BF_REP1_REP2_pooled_q0.01_peak_1199
c	hr10 37140624 37140773 150 37140681 14.00 4.80458 3.05099 2.2	4391 E11.5_MANP_CHIP_G3BF_REP1_REP2_pooled_q0.01_peak_1200
c	hr10 37263639 37263886 248 37263750 38.00 30.86952 10.65815 2	7.05543 E11.5_MANP_CHIP_G3BF_REP1_REP2_pooled_q0.01_peak_1201
c	hr10 37797810 37798021 212 37797925 21.00 12.80816 6.01229 9.	68985 E11.5_MANP_CHIP_G3BF_REP1_REP2_pooled_q0.01_peak_1202
c	hr10 38553873 38554441 569 38554226 107.00 129.39363 29.51488	124.32175 E11.5_MANP_CHIP_G3BF_REP1_REP2_pooled_q0.01_peak_1203
c	hr10 39029726 39030470 745 39029858 20.00 8.87424 4.27139 6.0	0180 E11.5_MANP_CHIP_G3BF_REP1_REP2_pooled_q0.01_peak_1204a
c	hr10 39029726 39030470 745 39030156 43.00 27.32975 7.90064 23	.64095 E11.5_MANP_CHIP_G3BF_REP1_REP2_pooled_q0.01_peak_1204b
c	hr10 39134062 39134233 172 39134146 16.00 8.41648 4.64586 5.5	5904 E11.5_MANP_CHIP_G3BF_REP1_REP2_pooled_q0.01_peak_1205
c	hr10 39171361 39171534 174 39171433 17.00 9.25085 4.91915 6.3	3859 E11.5_MANP_CHIP_G3BF_REP1_REP2_pooled_q0.01_peak_1206
c	hr10 39226748 39227128 381 39226846 14.00 5.73077 3.51808 3.0	9497 E11.5_MANP_CHIP_G3BF_REP1_REP2_pooled_q0.01_peak_1207a
c	hr10 39226748 39227128 381 39227034 13.00 6.06527 3.82600 3.3	8153 E11.5_MANP_CHIP_G3BF_REP1_REP2_pooled_q0.01_peak_1207b
c	hr10 39321160 39321505 346 39321417 18.00 10.10829 5.19243 7.	14298 E11.5_MANP_CHIP_G3BF_REP1_REP2_pooled_q0.01_peak_1208
c	hr10 39369846 39370497 652 39369972 18.00 10.10829 5.19243 7.	14298 E11.5_MANP_CHIP_G3BF_REP1_REP2_pooled_q0.01_peak_1209a
c	hr10 39369846 39370497 652 39370239 16.00 8.41648 4.64586 5.5	5904 E11.5_MANP_CHIP_G3BF_REP1_REP2_pooled_q0.01_peak_1209b
c	hr10 39523027 39523346 320 39523178 54.00 48.77005 14.03870 4	4.54879 E11.5_MANP_CHIP_G3BF_REP1_REP2_pooled_q0.01_peak_1210
c	hr10 39613179 39613333 155 39613316 16.00 6.06792 3.45779 3.3	8153 E11.5_MANP_CHIP_G3BF_REP1_REP2_pooled_q0.01_peak_1211
c	hr10 39614214 39614451 238 39614372 13.00 6.06527 3.82600 3.3	8153 E11.5_MANP_CHIP_G3BF_REP1_REP2_pooled_q0.01_peak_1212
c	hr10 39614661 39614990 330 39614840 29.00 20.79730 8.19858 17	.31392 E11.5_MANP_CHIP_G3BF_REP1_REP2_pooled_q0.01_peak_1213
c	hr10 39640794 39641204 411 39640935 22.00 10.40017 4.67819 7.	42281 E11.5_MANP_CHIP_G3BF_REP1_REP2_pooled_q0.01_peak_1214
c	hr10 39654070 39654281 212 39654194 16.00 7.07026 3.94727 4.3	2054 E11.5_MANP_CHIP_G3BF_REP1_REP2_pooled_q0.01_peak_1215
c	hr10 39731140 39733065 1926 39731284 18.00 10.10829 5.19243 7	.14298 E11.5_MANP_CHIP_G3BF_REP1_REP2_pooled_q0.01_peak_1216a
c	hr10 39731140 39733065 1926 39731818 24.00 15.68020 6.83215 1	2.41189 E11.5_MANP_CHIP_G3BF_REP1_REP2_pooled_q0.01_peak_1216b
c	hr10 39731140 39733065 1926 39732246 20.00 11.88794 5.73901 8	.81922 E11.5_MANP_CHIP_G3BF_REP1_REP2_pooled_q0.01_peak_1216c
c	hr10 39731140 39733065 1926 39732738 24.00 10.59585 4.48900 7	.61518 E11.5_MANP_CHIP_G3BF_REP1_REP2_pooled_q0.01_peak_1216d
c	hr10 39731140 39733065 1926 39732972 14.00 6.82220 4.09929 4.	07683 E11.5_MANP_CHIP_G3BF_REP1_REP2_pooled_q0.01_peak_1216e
c	hr10 39898985 39899143 159 39899067 19.00 7.36391 3.71982 4.6	0521 E11.5_MANP_CHIP_G3BF_REP1_REP2_pooled_q0.01_peak_1217
c	hr10 39967625 39967861 237 39967737 38.00 20.52158 6.26818 17	.06624 E11.5_MANP_CHIP_G3BF_REP1_REP2_pooled_q0.01_peak_1218
c	hr10 40025171 40025552 382 40025304 16.00 8.41648 4.64586 5.5	5904 E11.5_MANP_CHIP_G3BF_REP1_REP2_pooled_q0.01_peak_1219a
c	hr10 40025171 40025552 382 40025417 18.00 10.10829 5.19243 7.	14298 E11.5_MANP_CHIP_G3BF_REP1_REP2_pooled_q0.01_peak_1219b
c	hr10 40246797 40247133 337 40246873 18.00 10.10829 5.19243 7.	14298 E11.5_MANP_CHIP_G3BF_REP1_REP2_pooled_q0.01_peak_1220
c	hr10 40257290 40258143 854 40257598 31.00 22.64288 8.59470 19	.10658 E11.5_MANP_CHIP_G3BF_REP1_REP2_pooled_q0.01_peak_1221
c	hr10 40258410 40258944 535 40258573 43.00 36.86421 12.02458 3	2.89013 E11.5_MANP_CHIP_G3BF_REP1_REP2_pooled_q0.01_peak_1222
c	hr10 40300710 40302575 1866 40301080 32.00 19.02124 6.71219 1	5.61584 E11.5_MANP_CHIP_G3BF_REP1_REP2_pooled_q0.01_peak_1223a
c	hr10 40300710 40302575 1866 40301479 45.00 39.33184 12.57115	35.30061 E11.5_MANP_CHIP_G3BF_REP1_REP2_pooled_q0.01_peak_1223b
c	hr10 40300710 40302575 1866 40301671 32.00 24.04164 9.01844 2	0.43975 E11.5_MANP_CHIP_G3BF_REP1_REP2_pooled_q0.01_peak_1223c
c	hr10 40300710 40302575 1866 40301884 20.00 11.88794 5.73901 8	.81922 E11.5_MANP_CHIP_G3BF_REP1_REP2_pooled_q0.01_peak_1223d
c	hr10 40300710 40302575 1866 40302164 24.00 15.68020 6.83215 1	2.41189 E11.5_MANP_CHIP_G3BF_REP1_REP2_pooled_q0.01_peak_1223e
c	hr10 40300710 40302575 1866 40302422 31.00 20.35381 7.50523 1	6.90069 E11.5_MANP_CHIP_G3BF_REP1_REP2_pooled_q0.01_peak_1223f
c	hr10 40302666 40303003 338 40302774 12.00 5.33746 3.55272 2.7	1634 E11.5_MANP_CHIP_G3BF_REP1_REP2_pooled_q0.01_peak_1224a
c	hr10 40302666 40303003 338 40302981 12.00 5.33746 3.55272 2.7	1634 E11.5_MANP_CHIP_G3BF_REP1_REP2_pooled_q0.01_peak_1224b
c	hr10 40348936 40349145 210 40349052 17.00 8.63094 4.59448 5.7	7035 E11.5_MANP_CHIP_G3BF_REP1_REP2_pooled_q0.01_peak_1225
c	hr10 40349399 40350188 790 40349629 13.00 5.44395 3.48693 2.8	1785 E11.5_MANP_CHIP_G3BF_REP1_REP2_pooled_q0.01_peak_1226a
c	hr10 40349399 40350188 790 40349965 14.00 5.73077 3.51808 3.0	9497 E11.5_MANP_CHIP_G3BF_REP1_REP2_pooled_q0.01_peak_1226b
c	hr10 40371901 40372135 235 40371984 16.00 6.06792 3.45779 3.3	8153 E11.5_MANP_CHIP_G3BF_REP1_REP2_pooled_q0.01_peak_1227
c	hr10 40425406 40425613 208 40425520 30.00 19.36089 7.27069 15	.94879 E11.5_MANP_CHIP_G3BF_REP1_REP2_pooled_q0.01_peak_1228
c	hr10 40582855 40583413 559 40582958 36.00 28.54655 10.11158 2	4.80025 E11.5_MANP_CHIP_G3BF_REP1_REP2_pooled_q0.01_peak_1229a
c	hr10 40582855 40583413 559 40583284 21.00 11.10059 5.15985 8.	07674 E11.5_MANP_CHIP_G3BF_REP1_REP2_pooled_q0.01_peak_1229b
c	hr10 40683200 40683699 500 40683268 14.00 6.82220 4.09929 4.0	7683 E11.5_MANP_CHIP_G3BF_REP1_REP2_pooled_q0.01_peak_1230a
c	hr10 40683200 40683699 500 40683561 17.00 9.25085 4.91915 6.3	3859 E11.5_MANP_CHIP_G3BF_REP1_REP2_pooled_q0.01_peak_1230b
c	hr10 40882886 40883779 894 40883219 22.00 11.95153 5.39439 8.	87686 E11.5_MANP_CHIP_G3BF_REP1_REP2_pooled_q0.01_peak_1231a
c	hr10 40882886 40883779 894 40883678 22.00 13.74746 6.28558 10	.57194 E11.5_MANP_CHIP_G3BF_REP1_REP2_pooled_q0.01_peak_1231b
c	hr10 40883935 40884201 267 40884032 19.00 10.98767 5.46572 7.	97026 E11.5_MANP_CHIP_G3BF_REP1_REP2_pooled_q0.01_peak_1232
c	hr10 41229069 41229307 239 41229181 23.00 14.70505 6.55886 11	.48259 E11.5_MANP_CHIP_G3BF_REP1_REP2_pooled_q0.01_peak_1233
c	hr10 41450406 41450786 381 41450496 34.00 26.26973 9.56501 22	.59474 E11.5_MANP_CHIP_G3BF_REP1_REP2_pooled_q0.01_peak_1234a
c	hr10 41450406 41450786 381 41450691 13.00 6.06527 3.82600 3.3	8153 E11.5_MANP_CHIP_G3BF_REP1_REP2_pooled_q0.01_peak_1234b
c	hr10 41476276 41476719 444 41476632 13.00 6.06527 3.82600 3.3	8153 E11.5_MANP_CHIP_G3BF_REP1_REP2_pooled_q0.01_peak_1235
c	hr10 41476895 41477368 474 41477106 53.00 49.56038 14.75744 4	5.31981 E11.5_MANP_CHIP_G3BF_REP1_REP2_pooled_q0.01_peak_1236
c	hr10 41490090 41490670 581 41490235 40.00 29.84470 9.61608 26	.06034 E11.5_MANP_CHIP_G3BF_REP1_REP2_pooled_q0.01_peak_1237a
c	hr10 41490090 41490670 581 41490521 28.00 13.72431 5.20724 10	.57194 E11.5_MANP_CHIP_G3BF_REP1_REP2_pooled_q0.01_peak_1237b
c	hr10 41519418 41520110 693 41519592 33.00 22.37907 7.97431 18	.84602 E11.5_MANP_CHIP_G3BF_REP1_REP2_pooled_q0.01_peak_1238
c	hr10 41810180 41810449 270 41810327 26.00 15.53067 6.33254 12	.29179 E11.5_MANP_CHIP_G3BF_REP1_REP2_pooled_q0.01_peak_1239
c	hr10 42275596 42275917 322 42275679 17.00 5.79621 3.23208 3.1	5738 E11.5_MANP_CHIP_G3BF_REP1_REP2_pooled_q0.01_peak_1240
c	hr10 42276089 42276247 159 42276159 17.00 7.89603 4.22169 5.0	8356 E11.5_MANP_CHIP_G3BF_REP1_REP2_pooled_q0.01_peak_1241
c	hr10 42276333 42277295 963 42276589 14.00 6.82220 4.09929 4.0	7683 E11.5_MANP_CHIP_G3BF_REP1_REP2_pooled_q0.01_peak_1242a
c	hr10 42276333 42277295 963 42276766 15.00 7.60646 4.37258 4.8	0472 E11.5_MANP_CHIP_G3BF_REP1_REP2_pooled_q0.01_peak_1242b
c	hr10 42276333 42277295 963 42276956 15.00 7.60646 4.37258 4.8	0472 E11.5_MANP_CHIP_G3BF_REP1_REP2_pooled_q0.01_peak_1242c
c	hr10 42276333 42277295 963 42277107 23.00 14.70505 6.55886 11	.48259 E11.5_MANP_CHIP_G3BF_REP1_REP2_pooled_q0.01_peak_1242d
c	hr10 42277484 42278347 864 42277696 20.00 11.88794 5.73901 8.	81922 E11.5_MANP_CHIP_G3BF_REP1_REP2_pooled_q0.01_peak_1243a
c	hr10 42277484 42278347 864 42278063 19.00 10.98767 5.46572 7.	97026 E11.5_MANP_CHIP_G3BF_REP1_REP2_pooled_q0.01_peak_1243b
c	hr10 42278512 42278711 200 42278631 13.00 6.06527 3.82600 3.3	8153 E11.5_MANP_CHIP_G3BF_REP1_REP2_pooled_q0.01_peak_1244
c	hr10 42308277 42308437 161 42308353 25.00 14.61092 6.09800 11	.41868 E11.5_MANP_CHIP_G3BF_REP1_REP2_pooled_q0.01_peak_1245
c	hr10 42478232 42478565 334 42478306 20.00 11.88794 5.73901 8.	81922 E11.5_MANP_CHIP_G3BF_REP1_REP2_pooled_q0.01_peak_1246
c	hr10 42502142 42502726 585 42502228 14.00 6.14722 3.73599 3.4	5996 E11.5_MANP_CHIP_G3BF_REP1_REP2_pooled_q0.01_peak_1247a
c	hr10 42502142 42502726 585 42502487 26.00 17.68052 7.37872 14	.32329 E11.5_MANP_CHIP_G3BF_REP1_REP2_pooled_q0.01_peak_1247b
c	hr10 42614131 42614404 274 42614222 15.00 7.60646 4.37258 4.8	0472 E11.5_MANP_CHIP_G3BF_REP1_REP2_pooled_q0.01_peak_1248
c	hr10 42706333 42706553 221 42706431 21.00 12.80816 6.01229 9.	68985 E11.5_MANP_CHIP_G3BF_REP1_REP2_pooled_q0.01_peak_1249
c	hr10 42761588 42762600 1013 42761732 24.00 15.68020 6.83215 1	2.41189 E11.5_MANP_CHIP_G3BF_REP1_REP2_pooled_q0.01_peak_1250a
c	hr10 42761588 42762600 1013 42761990 27.00 18.70449 7.65201 1	5.30417 E11.5_MANP_CHIP_G3BF_REP1_REP2_pooled_q0.01_peak_1250b
c	hr10 42761588 42762600 1013 42762444 21.00 12.80816 6.01229 9	.68985 E11.5_MANP_CHIP_G3BF_REP1_REP2_pooled_q0.01_peak_1250c
c	hr10 43154980 43155128 149 43155050 11.00 4.54195 3.22301 2.0	3764 E11.5_MANP_CHIP_G3BF_REP1_REP2_pooled_q0.01_peak_1251
c	hr10 43173499 43173695 197 43173554 11.00 4.64076 3.27943 2.0	8535 E11.5_MANP_CHIP_G3BF_REP1_REP2_pooled_q0.01_peak_1252
c	hr10 43174013 43174533 521 43174083 13.00 6.06527 3.82600 3.3	8153 E11.5_MANP_CHIP_G3BF_REP1_REP2_pooled_q0.01_peak_1253a
c	hr10 43174013 43174533 521 43174298 21.00 12.80816 6.01229 9.	68985 E11.5_MANP_CHIP_G3BF_REP1_REP2_pooled_q0.01_peak_1253b
c	hr10 43220965 43221662 698 43221316 25.00 16.67223 7.10544 13	.35840 E11.5_MANP_CHIP_G3BF_REP1_REP2_pooled_q0.01_peak_1254
c	hr10 43277362 43277537 176 43277440 21.00 12.80816 6.01229 9.	68985 E11.5_MANP_CHIP_G3BF_REP1_REP2_pooled_q0.01_peak_1255
c	hr10 43478227 43480208 1982 43478330 17.00 9.25085 4.91915 6.	33859 E11.5_MANP_CHIP_G3BF_REP1_REP2_pooled_q0.01_peak_1256a
c	hr10 43478227 43480208 1982 43478658 24.00 15.44841 6.71461 1	2.21472 E11.5_MANP_CHIP_G3BF_REP1_REP2_pooled_q0.01_peak_1256b
c	hr10 43478227 43480208 1982 43478836 19.00 8.14055 4.06799 5.	32214 E11.5_MANP_CHIP_G3BF_REP1_REP2_pooled_q0.01_peak_1256c
c	hr10 43478227 43480208 1982 43479179 43.00 35.20064 11.23096	31.28286 E11.5_MANP_CHIP_G3BF_REP1_REP2_pooled_q0.01_peak_1256d
c	hr10 43478227 43480208 1982 43479624 36.00 28.54655 10.11158	24.80025 E11.5_MANP_CHIP_G3BF_REP1_REP2_pooled_q0.01_peak_1256e
c	hr10 43478227 43480208 1982 43480069 20.00 8.87424 4.27139 6.	00180 E11.5_MANP_CHIP_G3BF_REP1_REP2_pooled_q0.01_peak_1256f
c	hr10 43540748 43541114 367 43541031 16.00 8.04724 4.44970 5.2	3277 E11.5_MANP_CHIP_G3BF_REP1_REP2_pooled_q0.01_peak_1257
c	hr10 43578304 43580341 2038 43578434 25.00 16.07442 6.80542 1	2.80246 E11.5_MANP_CHIP_G3BF_REP1_REP2_pooled_q0.01_peak_1258a
c	hr10 43578304 43580341 2038 43578765 49.00 44.37739 13.66430	40.23867 E11.5_MANP_CHIP_G3BF_REP1_REP2_pooled_q0.01_peak_1258b
c	hr10 43578304 43580341 2038 43578956 51.00 38.74394 10.57678	34.73755 E11.5_MANP_CHIP_G3BF_REP1_REP2_pooled_q0.01_peak_1258c
c	hr10 43578304 43580341 2038 43579152 53.00 49.56038 14.75744	45.31981 E11.5_MANP_CHIP_G3BF_REP1_REP2_pooled_q0.01_peak_1258d
c	hr10 43578304 43580341 2038 43579646 47.00 37.82338 11.25785	33.83892 E11.5_MANP_CHIP_G3BF_REP1_REP2_pooled_q0.01_peak_1258e
c	hr10 43578304 43580341 2038 43580009 39.00 32.04759 10.93144	28.20100 E11.5_MANP_CHIP_G3BF_REP1_REP2_pooled_q0.01_peak_1258f
c	hr10 43580412 43580961 550 43580789 26.00 17.68052 7.37872 14	.32329 E11.5_MANP_CHIP_G3BF_REP1_REP2_pooled_q0.01_peak_1259
c	hr10 43581061 43581614 554 43581155 19.00 10.98767 5.46572 7.	97026 E11.5_MANP_CHIP_G3BF_REP1_REP2_pooled_q0.01_peak_1260a
c	hr10 43581061 43581614 554 43581475 21.00 9.62773 4.47479 6.7	0316 E11.5_MANP_CHIP_G3BF_REP1_REP2_pooled_q0.01_peak_1260b
c	hr10 43722723 43723341 619 43723021 21.00 9.62773 4.47479 6.7	0316 E11.5_MANP_CHIP_G3BF_REP1_REP2_pooled_q0.01_peak_1261a
c	hr10 43722723 43723341 619 43723239 19.00 10.98767 5.46572 7.	97026 E11.5_MANP_CHIP_G3BF_REP1_REP2_pooled_q0.01_peak_1261b
c	hr10 43901482 43901783 302 43901633 22.00 11.95153 5.39439 8.	87686 E11.5_MANP_CHIP_G3BF_REP1_REP2_pooled_q0.01_peak_1262
c	hr10 44268254 44268402 149 44268325 13.00 5.06128 3.28354 2.4	9038 E11.5_MANP_CHIP_G3BF_REP1_REP2_pooled_q0.01_peak_1263
c	hr10 44409280 44409494 215 44409402 18.00 10.10829 5.19243 7.	14298 E11.5_MANP_CHIP_G3BF_REP1_REP2_pooled_q0.01_peak_1264
c	hr10 45009681 45009953 273 45009823 29.00 20.79730 8.19858 17	.31392 E11.5_MANP_CHIP_G3BF_REP1_REP2_pooled_q0.01_peak_1265
c	hr10 45066725 45066972 248 45066823 20.00 8.87424 4.27139 6.0	0180 E11.5_MANP_CHIP_G3BF_REP1_REP2_pooled_q0.01_peak_1266
c	hr10 45067073 45067678 606 45067222 24.00 11.61161 4.91658 8.	57795 E11.5_MANP_CHIP_G3BF_REP1_REP2_pooled_q0.01_peak_1267a
c	hr10 45067073 45067678 606 45067366 23.00 8.73201 3.85734 5.8	6461 E11.5_MANP_CHIP_G3BF_REP1_REP2_pooled_q0.01_peak_1267b
c	hr10 45067073 45067678 606 45067602 22.00 5.68830 2.81169 3.0	5931 E11.5_MANP_CHIP_G3BF_REP1_REP2_pooled_q0.01_peak_1267c
c	hr10 45458183 45458359 177 45458275 23.00 14.70505 6.55886 11	.48259 E11.5_MANP_CHIP_G3BF_REP1_REP2_pooled_q0.01_peak_1268
c	hr10 45469591 45469870 280 45469671 11.00 4.64076 3.27943 2.0	8535 E11.5_MANP_CHIP_G3BF_REP1_REP2_pooled_q0.01_peak_1269
c	hr10 45470020 45470280 261 45470151 20.00 11.88794 5.73901 8.	81922 E11.5_MANP_CHIP_G3BF_REP1_REP2_pooled_q0.01_peak_1270
c	hr10 45485659 45486274 616 45485974 17.00 9.25085 4.91915 6.3	3859 E11.5_MANP_CHIP_G3BF_REP1_REP2_pooled_q0.01_peak_1271a
c	hr10 45485659 45486274 616 45486197 14.00 5.73077 3.51808 3.0	9497 E11.5_MANP_CHIP_G3BF_REP1_REP2_pooled_q0.01_peak_1271b
c	hr10 45577790 45578375 586 45578010 25.00 16.07442 6.80542 12	.80246 E11.5_MANP_CHIP_G3BF_REP1_REP2_pooled_q0.01_peak_1272
c	hr10 45807175 45807397 223 45807290 14.00 5.22878 3.26190 2.6	5206 E11.5_MANP_CHIP_G3BF_REP1_REP2_pooled_q0.01_peak_1273
c	hr10 45894496 45894811 316 45894544 15.00 6.42739 3.75262 3.7	2916 E11.5_MANP_CHIP_G3BF_REP1_REP2_pooled_q0.01_peak_1274a
c	hr10 45894496 45894811 316 45894744 15.00 7.60646 4.37258 4.8	0472 E11.5_MANP_CHIP_G3BF_REP1_REP2_pooled_q0.01_peak_1274b
c	hr10 49788753 49789210 458 49788871 21.00 12.80816 6.01229 9.	68985 E11.5_MANP_CHIP_G3BF_REP1_REP2_pooled_q0.01_peak_1275
c	hr10 50579529 50579714 186 50579620 15.00 7.60646 4.37258 4.8	0472 E11.5_MANP_CHIP_G3BF_REP1_REP2_pooled_q0.01_peak_1276
c	hr10 52144386 52144534 149 52144512 18.00 10.10829 5.19243 7.	14298 E11.5_MANP_CHIP_G3BF_REP1_REP2_pooled_q0.01_peak_1277
c	hr10 52233697 52234327 631 52233799 26.00 17.68052 7.37872 14	.32329 E11.5_MANP_CHIP_G3BF_REP1_REP2_pooled_q0.01_peak_1278
c	hr10 52381731 52382084 354 52381985 23.00 14.15814 6.28193 10	.97878 E11.5_MANP_CHIP_G3BF_REP1_REP2_pooled_q0.01_peak_1279
c	hr10 52417437 52418396 960 52417664 28.00 19.74358 7.92529 16	.30083 E11.5_MANP_CHIP_G3BF_REP1_REP2_pooled_q0.01_peak_1280a
c	hr10 52417437 52418396 960 52418001 33.00 25.14942 9.29172 21	.51036 E11.5_MANP_CHIP_G3BF_REP1_REP2_pooled_q0.01_peak_1280b
c	hr10 52430416 52430566 151 52430481 11.00 4.64076 3.27943 2.0	8535 E11.5_MANP_CHIP_G3BF_REP1_REP2_pooled_q0.01_peak_1281
c	hr10 53379067 53379851 785 53379327 29.00 20.79730 8.19858 17	.31392 E11.5_MANP_CHIP_G3BF_REP1_REP2_pooled_q0.01_peak_1282a
c	hr10 53379067 53379851 785 53379494 38.00 30.86952 10.65815 2	7.05543 E11.5_MANP_CHIP_G3BF_REP1_REP2_pooled_q0.01_peak_1282b
c	hr10 53596391 53596641 251 53596512 18.00 10.10829 5.19243 7.	14298 E11.5_MANP_CHIP_G3BF_REP1_REP2_pooled_q0.01_peak_1283
c	hr10 53596770 53598010 1241 53596909 26.00 17.68052 7.37872 1	4.32329 E11.5_MANP_CHIP_G3BF_REP1_REP2_pooled_q0.01_peak_1284a
c	hr10 53596770 53598010 1241 53597243 31.00 14.64312 5.14312 1	1.45036 E11.5_MANP_CHIP_G3BF_REP1_REP2_pooled_q0.01_peak_1284b
c	hr10 53596770 53598010 1241 53597531 32.00 24.04164 9.01844 2	0.43975 E11.5_MANP_CHIP_G3BF_REP1_REP2_pooled_q0.01_peak_1284c
c	hr10 53596770 53598010 1241 53597890 21.00 12.80816 6.01229 9	.68985 E11.5_MANP_CHIP_G3BF_REP1_REP2_pooled_q0.01_peak_1284d
c	hr10 53629450 53629950 501 53629723 26.00 17.68052 7.37872 14	.32329 E11.5_MANP_CHIP_G3BF_REP1_REP2_pooled_q0.01_peak_1285
c	hr10 56114977 56115763 787 56115190 27.00 18.70449 7.65201 15	.30417 E11.5_MANP_CHIP_G3BF_REP1_REP2_pooled_q0.01_peak_1286a
c	hr10 56114977 56115763 787 56115383 19.00 9.45664 4.69077 6.5	3596 E11.5_MANP_CHIP_G3BF_REP1_REP2_pooled_q0.01_peak_1286b
c	hr10 56228775 56228946 172 56228847 21.00 5.81899 2.92266 3.1	7966 E11.5_MANP_CHIP_G3BF_REP1_REP2_pooled_q0.01_peak_1287
c	hr10 56377284 56377706 423 56377458 17.00 9.25085 4.91915 6.3	3859 E11.5_MANP_CHIP_G3BF_REP1_REP2_pooled_q0.01_peak_1288
c	hr10 56377778 56379236 1459 56378025 24.00 15.68020 6.83215 1	2.41189 E11.5_MANP_CHIP_G3BF_REP1_REP2_pooled_q0.01_peak_1289a
c	hr10 56377778 56379236 1459 56378428 25.00 16.67223 7.10544 1	3.35840 E11.5_MANP_CHIP_G3BF_REP1_REP2_pooled_q0.01_peak_1289b
c	hr10 56377778 56379236 1459 56378651 24.00 15.68020 6.83215 1	2.41189 E11.5_MANP_CHIP_G3BF_REP1_REP2_pooled_q0.01_peak_1289c
c	hr10 56377778 56379236 1459 56378823 24.00 13.70739 5.86346 1	0.56365 E11.5_MANP_CHIP_G3BF_REP1_REP2_pooled_q0.01_peak_1289d
c	hr10 56377778 56379236 1459 56379107 20.00 11.88794 5.73901 8	.81922 E11.5_MANP_CHIP_G3BF_REP1_REP2_pooled_q0.01_peak_1289e
c	hr10 56434160 56434315 156 56434238 16.00 8.41648 4.64586 5.5	5904 E11.5_MANP_CHIP_G3BF_REP1_REP2_pooled_q0.01_peak_1290
c	hr10 56795547 56795713 167 56795641 14.00 6.82220 4.09929 4.0	7683 E11.5_MANP_CHIP_G3BF_REP1_REP2_pooled_q0.01_peak_1291
c	hr10 56979588 56979952 365 56979812 36.00 28.54655 10.11158 2	4.80025 E11.5_MANP_CHIP_G3BF_REP1_REP2_pooled_q0.01_peak_1292
c	hr10 57040331 57040631 301 57040445 18.00 10.10829 5.19243 7.	14298 E11.5_MANP_CHIP_G3BF_REP1_REP2_pooled_q0.01_peak_1293
c	hr10 57486351 57487098 748 57486536 33.00 19.96143 6.91559 16	.51522 E11.5_MANP_CHIP_G3BF_REP1_REP2_pooled_q0.01_peak_1294a
c	hr10 57486351 57487098 748 57486746 24.00 15.68020 6.83215 12	.41189 E11.5_MANP_CHIP_G3BF_REP1_REP2_pooled_q0.01_peak_1294b
c	hr10 57486351 57487098 748 57486968 23.00 14.70505 6.55886 11	.48259 E11.5_MANP_CHIP_G3BF_REP1_REP2_pooled_q0.01_peak_1294c
c	hr10 57531980 57532464 485 57532327 22.00 13.74746 6.28558 10	.57194 E11.5_MANP_CHIP_G3BF_REP1_REP2_pooled_q0.01_peak_1295
c	hr10 58255435 58255656 222 58255583 13.00 6.06527 3.82600 3.3	8153 E11.5_MANP_CHIP_G3BF_REP1_REP2_pooled_q0.01_peak_1296
c	hr10 58323463 58323940 478 58323810 29.00 20.79730 8.19858 17	.31392 E11.5_MANP_CHIP_G3BF_REP1_REP2_pooled_q0.01_peak_1297
c	hr10 58446494 58447564 1071 58446621 16.00 8.26679 4.56593 5.	44596 E11.5_MANP_CHIP_G3BF_REP1_REP2_pooled_q0.01_peak_1298a
c	hr10 58446494 58447564 1071 58447023 46.00 27.89265 7.55395 2	4.17479 E11.5_MANP_CHIP_G3BF_REP1_REP2_pooled_q0.01_peak_1298b
c	hr10 58497853 58498214 362 58497996 22.00 10.40017 4.67819 7.	42281 E11.5_MANP_CHIP_G3BF_REP1_REP2_pooled_q0.01_peak_1299
c	hr10 58668952 58669142 191 58669035 13.00 5.06128 3.28354 2.4	9038 E11.5_MANP_CHIP_G3BF_REP1_REP2_pooled_q0.01_peak_1300
c	hr10 58932412 58932567 156 58932549 18.00 10.10829 5.19243 7.	14298 E11.5_MANP_CHIP_G3BF_REP1_REP2_pooled_q0.01_peak_1301
c	hr10 59114642 59114891 250 59114758 23.00 14.70505 6.55886 11	.48259 E11.5_MANP_CHIP_G3BF_REP1_REP2_pooled_q0.01_peak_1302
c	hr10 59209219 59209369 151 59209299 16.00 8.41648 4.64586 5.5	5904 E11.5_MANP_CHIP_G3BF_REP1_REP2_pooled_q0.01_peak_1303
c	hr10 59221242 59221559 318 59221296 13.00 5.77171 3.66446 3.1	3443 E11.5_MANP_CHIP_G3BF_REP1_REP2_pooled_q0.01_peak_1304
c	hr10 59221656 59222640 985 59221754 25.00 15.40237 6.47572 12	.17070 E11.5_MANP_CHIP_G3BF_REP1_REP2_pooled_q0.01_peak_1305a
c	hr10 59221656 59222640 985 59222033 24.00 9.41637 4.01806 6.5	0269 E11.5_MANP_CHIP_G3BF_REP1_REP2_pooled_q0.01_peak_1305b
c	hr10 59221656 59222640 985 59222247 24.00 15.68020 6.83215 12	.41189 E11.5_MANP_CHIP_G3BF_REP1_REP2_pooled_q0.01_peak_1305c
c	hr10 59323312 59323880 569 59323458 24.00 15.68020 6.83215 12	.41189 E11.5_MANP_CHIP_G3BF_REP1_REP2_pooled_q0.01_peak_1306
c	hr10 59615809 59615976 168 59615882 13.00 5.06128 3.28354 2.4	9038 E11.5_MANP_CHIP_G3BF_REP1_REP2_pooled_q0.01_peak_1307
c	hr10 59616284 59616729 446 59616384 17.00 9.25085 4.91915 6.3	3859 E11.5_MANP_CHIP_G3BF_REP1_REP2_pooled_q0.01_peak_1308a
c	hr10 59616284 59616729 446 59616632 27.00 16.46606 6.56708 13	.18194 E11.5_MANP_CHIP_G3BF_REP1_REP2_pooled_q0.01_peak_1308b
c	hr10 59865140 59865348 209 59865217 15.00 7.60646 4.37258 4.8	0472 E11.5_MANP_CHIP_G3BF_REP1_REP2_pooled_q0.01_peak_1309
c	hr10 59879346 59880112 767 59879830 23.00 11.19078 4.88159 8.	16244 E11.5_MANP_CHIP_G3BF_REP1_REP2_pooled_q0.01_peak_1310
c	hr10 59916767 59916990 224 59916883 17.00 9.25085 4.91915 6.3	3859 E11.5_MANP_CHIP_G3BF_REP1_REP2_pooled_q0.01_peak_1311
c	hr10 59951329 59951826 498 59951408 18.00 10.10829 5.19243 7.	14298 E11.5_MANP_CHIP_G3BF_REP1_REP2_pooled_q0.01_peak_1312
c	hr10 59952104 59952305 202 59952180 15.00 7.60646 4.37258 4.8	0472 E11.5_MANP_CHIP_G3BF_REP1_REP2_pooled_q0.01_peak_1313
c	hr10 60002522 60002694 173 60002602 17.00 9.25085 4.91915 6.3	3859 E11.5_MANP_CHIP_G3BF_REP1_REP2_pooled_q0.01_peak_1314
c	hr10 60002781 60003065 285 60002937 20.00 11.88794 5.73901 8.	81922 E11.5_MANP_CHIP_G3BF_REP1_REP2_pooled_q0.01_peak_1315
c	hr10 60003298 60003484 187 60003387 12.00 5.33746 3.55272 2.7	1634 E11.5_MANP_CHIP_G3BF_REP1_REP2_pooled_q0.01_peak_1316
c	hr10 60029021 60029218 198 60029142 16.00 8.41648 4.64586 5.5	5904 E11.5_MANP_CHIP_G3BF_REP1_REP2_pooled_q0.01_peak_1317
c	hr10 60218893 60219443 551 60218993 13.00 6.06527 3.82600 3.3	8153 E11.5_MANP_CHIP_G3BF_REP1_REP2_pooled_q0.01_peak_1318a
c	hr10 60218893 60219443 551 60219157 14.00 5.73077 3.51808 3.0	9497 E11.5_MANP_CHIP_G3BF_REP1_REP2_pooled_q0.01_peak_1318b
c	hr10 60218893 60219443 551 60219410 11.00 4.64076 3.27943 2.0	8535 E11.5_MANP_CHIP_G3BF_REP1_REP2_pooled_q0.01_peak_1318c
c	hr10 60277735 60277890 156 60277794 15.00 7.60646 4.37258 4.8	0472 E11.5_MANP_CHIP_G3BF_REP1_REP2_pooled_q0.01_peak_1319
c	hr10 60346879 60347027 149 60346948 14.00 6.82220 4.09929 4.0	7683 E11.5_MANP_CHIP_G3BF_REP1_REP2_pooled_q0.01_peak_1320
c	hr10 60445208 60445595 388 60445412 88.00 99.55711 24.32245 9	4.70894 E11.5_MANP_CHIP_G3BF_REP1_REP2_pooled_q0.01_peak_1321
c	hr10 60752607 60752796 190 60752686 14.00 5.97947 3.64763 3.3	3714 E11.5_MANP_CHIP_G3BF_REP1_REP2_pooled_q0.01_peak_1322
c	hr10 60756944 60757150 207 60757060 17.00 9.25085 4.91915 6.3	3859 E11.5_MANP_CHIP_G3BF_REP1_REP2_pooled_q0.01_peak_1323
c	hr10 60760478 60760646 169 60760573 23.00 14.70505 6.55886 11	.48259 E11.5_MANP_CHIP_G3BF_REP1_REP2_pooled_q0.01_peak_1324
c	hr10 60807214 60807961 748 60807357 47.00 34.29994 9.76318 30	.40876 E11.5_MANP_CHIP_G3BF_REP1_REP2_pooled_q0.01_peak_1325a
c	hr10 60807214 60807961 748 60807829 16.00 7.14960 3.98715 4.3	9330 E11.5_MANP_CHIP_G3BF_REP1_REP2_pooled_q0.01_peak_1325b
c	hr10 60812135 60812289 155 60812205 11.00 4.64076 3.27943 2.0	8535 E11.5_MANP_CHIP_G3BF_REP1_REP2_pooled_q0.01_peak_1326
c	hr10 60830982 60831130 149 60831114 13.00 6.06527 3.82600 3.3	8153 E11.5_MANP_CHIP_G3BF_REP1_REP2_pooled_q0.01_peak_1327
c	hr10 60831304 60831716 413 60831469 15.00 7.60646 4.37258 4.8	0472 E11.5_MANP_CHIP_G3BF_REP1_REP2_pooled_q0.01_peak_1328
c	hr10 60857711 60857968 258 60857840 31.00 20.35381 7.50523 16	.90069 E11.5_MANP_CHIP_G3BF_REP1_REP2_pooled_q0.01_peak_1329
c	hr10 60885922 60886088 167 60886002 14.00 6.82220 4.09929 4.0	7683 E11.5_MANP_CHIP_G3BF_REP1_REP2_pooled_q0.01_peak_1330
c	hr10 61023597 61023754 158 61023667 20.00 10.26867 4.92531 7.	29611 E11.5_MANP_CHIP_G3BF_REP1_REP2_pooled_q0.01_peak_1331
c	hr10 61146077 61146951 875 61146549 19.00 10.98767 5.46572 7.	97026 E11.5_MANP_CHIP_G3BF_REP1_REP2_pooled_q0.01_peak_1332
c	hr10 61147110 61147686 577 61147238 25.00 11.35432 4.66856 8.	32383 E11.5_MANP_CHIP_G3BF_REP1_REP2_pooled_q0.01_peak_1333a
c	hr10 61147110 61147686 577 61147572 22.00 12.64034 5.72852 9.	55367 E11.5_MANP_CHIP_G3BF_REP1_REP2_pooled_q0.01_peak_1333b
c	hr10 61147852 61148055 204 61147979 14.00 6.69293 4.02877 3.9	9055 E11.5_MANP_CHIP_G3BF_REP1_REP2_pooled_q0.01_peak_1334
c	hr10 61211883 61212069 187 61212012 12.00 5.33746 3.55272 2.7	1634 E11.5_MANP_CHIP_G3BF_REP1_REP2_pooled_q0.01_peak_1335
c	hr10 61226742 61227072 331 61226915 50.00 34.48344 9.15756 30	.56872 E11.5_MANP_CHIP_G3BF_REP1_REP2_pooled_q0.01_peak_1336
c	hr10 61273237 61273389 153 61273333 15.00 7.60646 4.37258 4.8	0472 E11.5_MANP_CHIP_G3BF_REP1_REP2_pooled_q0.01_peak_1337
c	hr10 61452416 61452807 392 61452501 19.00 10.98767 5.46572 7.	97026 E11.5_MANP_CHIP_G3BF_REP1_REP2_pooled_q0.01_peak_1338
c	hr10 61475791 61476218 428 61475907 18.00 8.66541 4.45623 5.7	9866 E11.5_MANP_CHIP_G3BF_REP1_REP2_pooled_q0.01_peak_1339
c	hr10 61538063 61538250 188 61538136 18.00 10.10829 5.19243 7.	14298 E11.5_MANP_CHIP_G3BF_REP1_REP2_pooled_q0.01_peak_1340
c	hr10 61545289 61545617 329 61545411 22.00 13.74746 6.28558 10	.57194 E11.5_MANP_CHIP_G3BF_REP1_REP2_pooled_q0.01_peak_1341
c	hr10 61648690 61648876 187 61648790 18.00 10.10829 5.19243 7.	14298 E11.5_MANP_CHIP_G3BF_REP1_REP2_pooled_q0.01_peak_1342
c	hr10 61680368 61680535 168 61680487 13.00 5.06128 3.28354 2.4	9038 E11.5_MANP_CHIP_G3BF_REP1_REP2_pooled_q0.01_peak_1343
c	hr10 61695579 61695730 152 61695647 17.00 7.44343 3.99886 4.6	8033 E11.5_MANP_CHIP_G3BF_REP1_REP2_pooled_q0.01_peak_1344
c	hr10 61695836 61696087 252 61695897 14.00 5.73077 3.51808 3.0	9497 E11.5_MANP_CHIP_G3BF_REP1_REP2_pooled_q0.01_peak_1345
c	hr10 61782678 61784410 1733 61782866 18.00 5.58518 3.05373 2.	95791 E11.5_MANP_CHIP_G3BF_REP1_REP2_pooled_q0.01_peak_1346a
c	hr10 61782678 61784410 1733 61783115 30.00 21.86518 8.47186 1	8.34202 E11.5_MANP_CHIP_G3BF_REP1_REP2_pooled_q0.01_peak_1346b
c	hr10 61782678 61784410 1733 61783304 47.00 41.83675 13.11773	37.75009 E11.5_MANP_CHIP_G3BF_REP1_REP2_pooled_q0.01_peak_1346c
c	hr10 61782678 61784410 1733 61783505 42.00 35.64489 11.75130	31.70040 E11.5_MANP_CHIP_G3BF_REP1_REP2_pooled_q0.01_peak_1346d
c	hr10 61782678 61784410 1733 61783838 50.00 45.66067 13.93758	41.49469 E11.5_MANP_CHIP_G3BF_REP1_REP2_pooled_q0.01_peak_1346e
[truncated: 24,469 more rows]

## Sheet: E11.5_MANP_CHIP_HAND2_REP1_REP2
#	This file is generated by MACS version 2.1.1.20160309
#	Command line: callpeak -t E11.5_MANP_CHIP_HAND2_REP1_REP2_po	oled.sorted.bam -c ../../INPUT_CTRL/E11.5_MANP_INPUT_REP1_REP2_pooled.sorted.bam -f BAM -g mm -n E11.5_MANP_CHIP_HAND2_REP1_REP2_pooled_q0.01 -q 0.01 -m 5 50 --call-summits -B --trackline
#	ARGUMENTS LIST:
#	name = E11.5_MANP_CHIP_HAND2_REP1_REP2_pooled_q0.01
#	format = BAM
#	ChIP-seq file = ['E11.5_MANP_CHIP_HAND2_REP1_REP2_pooled.sor	ted.bam']
#	control file = ['../../INPUT_CTRL/E11.5_MANP_INPUT_REP1_REP2	_pooled.sorted.bam']
#	effective genome size = 1.87e+09
#	band width = 300
#	model fold = [5, 50]
#	qvalue cutoff = 1.00e-02
#	Larger dataset will be scaled towards smaller dataset.
#	Range for calculating regional lambda is: 1000 bps and 10000	bps
#	Broad region calling is off
#	Paired-End mode is off
#	Searching for subpeak summits is on
#	tag size is determined as 76 bps
#	total tags in treatment: 67929566
#	tags after filtering in treatment: 20476015
#	maximum duplicate tags at the same position in treatment = 1
#	Redundant rate in treatment: 0.70
#	total tags in control: 72690292
#	tags after filtering in control: 51128427
#	maximum duplicate tags at the same position in control = 1
#	Redundant rate in control: 0.30
#	d = 189
#	alternative fragment length(s) may be 189 bps
c	hr start end length abs_summit pileup -log10(pvalue) fold_enr	ichment -log10(qvalue) name
c	hr1 3191564 3192184 621 3191933 90.00 112.27610 29.64651 108.	87720 E11.5_MANP_CHIP_HAND2_REP1_REP2_pooled_q0.01_peak_1
c	hr1 3221097 3221358 262 3221261 13.00 7.35325 4.56100 5.27687	E11.5_MANP_CHIP_HAND2_REP1_REP2_pooled_q0.01_peak_2
c	hr1 3247978 3248391 414 3248230 28.00 19.13882 7.62481 16.696	17 E11.5_MANP_CHIP_HAND2_REP1_REP2_pooled_q0.01_peak_3
c	hr1 3670674 3670957 284 3670833 17.00 10.96977 5.86415 8.7392	2 E11.5_MANP_CHIP_HAND2_REP1_REP2_pooled_q0.01_peak_4
c	hr1 3671557 3671912 356 3671806 18.00 11.93525 6.18993 9.6714	9 E11.5_MANP_CHIP_HAND2_REP1_REP2_pooled_q0.01_peak_5
c	hr1 4034871 4035245 375 4034972 16.00 10.02746 5.53836 7.8312	7 E11.5_MANP_CHIP_HAND2_REP1_REP2_pooled_q0.01_peak_6
c	hr1 4571551 4572152 602 4572017 16.00 10.02746 5.53836 7.8312	7 E11.5_MANP_CHIP_HAND2_REP1_REP2_pooled_q0.01_peak_7
c	hr1 4672352 4672730 379 4672543 34.00 29.83204 11.40250 27.18	352 E11.5_MANP_CHIP_HAND2_REP1_REP2_pooled_q0.01_peak_8
c	hr1 4687589 4687825 237 4687707 18.00 6.65626 3.51507 4.61863	E11.5_MANP_CHIP_HAND2_REP1_REP2_pooled_q0.01_peak_9
c	hr1 4785272 4785568 297 4785454 19.00 12.92276 6.51572 10.627	88 E11.5_MANP_CHIP_HAND2_REP1_REP2_pooled_q0.01_peak_10
c	hr1 4846773 4846961 189 4846872 15.00 9.10962 5.21257 6.94957	E11.5_MANP_CHIP_HAND2_REP1_REP2_pooled_q0.01_peak_11
c	hr1 4857337 4858474 1138 4857645 35.00 23.04578 7.81871 20.51	702 E11.5_MANP_CHIP_HAND2_REP1_REP2_pooled_q0.01_peak_12
c	hr1 4858934 4859131 198 4859025 17.00 10.96977 5.86415 8.7392	2 E11.5_MANP_CHIP_HAND2_REP1_REP2_pooled_q0.01_peak_13
c	hr1 4873079 4873401 323 4873208 18.00 9.73159 4.99556 7.56505	E11.5_MANP_CHIP_HAND2_REP1_REP2_pooled_q0.01_peak_14
c	hr1 4969463 4969794 332 4969628 35.00 31.07319 11.72829 28.40	628 E11.5_MANP_CHIP_HAND2_REP1_REP2_pooled_q0.01_peak_15
c	hr1 5083018 5083431 414 5083325 13.00 4.59335 3.04061 2.70791	E11.5_MANP_CHIP_HAND2_REP1_REP2_pooled_q0.01_peak_16
c	hr1 5178528 5178823 296 5178672 13.00 6.57881 4.11415 4.54160	E11.5_MANP_CHIP_HAND2_REP1_REP2_pooled_q0.01_peak_17
c	hr1 5182644 5182850 207 5182738 16.00 10.02746 5.53836 7.8312	7 E11.5_MANP_CHIP_HAND2_REP1_REP2_pooled_q0.01_peak_18
c	hr1 5296617 5296889 273 5296760 22.00 16.00735 7.49307 13.626	55 E11.5_MANP_CHIP_HAND2_REP1_REP2_pooled_q0.01_peak_19
c	hr1 5588286 5588516 231 5588392 12.00 6.51816 4.23522 4.49107	E11.5_MANP_CHIP_HAND2_REP1_REP2_pooled_q0.01_peak_20
c	hr1 5806429 5806617 189 5806522 12.00 6.21929 4.05919 4.22687	E11.5_MANP_CHIP_HAND2_REP1_REP2_pooled_q0.01_peak_21
c	hr1 5815115 5815489 375 5815316 49.00 49.57059 16.28929 46.67	432 E11.5_MANP_CHIP_HAND2_REP1_REP2_pooled_q0.01_peak_22
c	hr1 6095706 6095904 199 6095797 16.00 10.02746 5.53836 7.8312	7 E11.5_MANP_CHIP_HAND2_REP1_REP2_pooled_q0.01_peak_23
c	hr1 6100683 6101101 419 6100892 46.00 45.44663 15.31194 42.59	351 E11.5_MANP_CHIP_HAND2_REP1_REP2_pooled_q0.01_peak_24
c	hr1 6170535 6170723 189 6170624 12.00 5.80770 3.82028 3.81936	E11.5_MANP_CHIP_HAND2_REP1_REP2_pooled_q0.01_peak_25
c	hr1 6193536 6193801 266 6193702 14.00 8.21768 4.88679 6.09597	E11.5_MANP_CHIP_HAND2_REP1_REP2_pooled_q0.01_peak_26
c	hr1 6214532 6215156 625 6214660 15.00 7.29785 4.20679 5.25202	E11.5_MANP_CHIP_HAND2_REP1_REP2_pooled_q0.01_peak_27a
c	hr1 6214532 6215156 625 6214986 23.00 17.07331 7.81886 14.666	32 E11.5_MANP_CHIP_HAND2_REP1_REP2_pooled_q0.01_peak_27b
c	hr1 6225489 6225733 245 6225620 17.00 10.96977 5.86415 8.7392	2 E11.5_MANP_CHIP_HAND2_REP1_REP2_pooled_q0.01_peak_28
c	hr1 6287459 6287969 511 6287696 57.00 60.93423 18.89558 57.92	719 E11.5_MANP_CHIP_HAND2_REP1_REP2_pooled_q0.01_peak_29
c	hr1 6370176 6370781 606 6370390 29.00 23.81653 9.77358 21.267	46 E11.5_MANP_CHIP_HAND2_REP1_REP2_pooled_q0.01_peak_30
c	hr1 6405884 6406505 622 6406266 74.00 86.59146 24.43394 83.37	283 E11.5_MANP_CHIP_HAND2_REP1_REP2_pooled_q0.01_peak_31
c	hr1 6445413 6445774 362 6445611 28.00 22.65424 9.44779 20.126	67 E11.5_MANP_CHIP_HAND2_REP1_REP2_pooled_q0.01_peak_32
c	hr1 6476383 6476650 268 6476533 16.00 9.06044 4.99575 6.92684	E11.5_MANP_CHIP_HAND2_REP1_REP2_pooled_q0.01_peak_33
c	hr1 6487906 6488094 189 6487998 13.00 7.35325 4.56100 5.27687	E11.5_MANP_CHIP_HAND2_REP1_REP2_pooled_q0.01_peak_34
c	hr1 6490198 6490568 371 6490393 31.00 26.18317 10.42515 23.59	259 E11.5_MANP_CHIP_HAND2_REP1_REP2_pooled_q0.01_peak_35
c	hr1 6752461 6752850 390 6752622 35.00 31.07319 11.72829 28.40	628 E11.5_MANP_CHIP_HAND2_REP1_REP2_pooled_q0.01_peak_36
c	hr1 6761236 6761641 406 6761428 71.00 81.93095 23.45658 78.74	734 E11.5_MANP_CHIP_HAND2_REP1_REP2_pooled_q0.01_peak_37
c	hr1 6858422 6858718 297 6858548 20.00 13.93124 6.84150 11.605	94 E11.5_MANP_CHIP_HAND2_REP1_REP2_pooled_q0.01_peak_38
c	hr1 7061311 7061534 224 7061430 15.00 6.53181 3.80603 4.50332	E11.5_MANP_CHIP_HAND2_REP1_REP2_pooled_q0.01_peak_39
c	hr1 7088431 7089285 855 7088746 23.00 17.07331 7.81886 14.666	32 E11.5_MANP_CHIP_HAND2_REP1_REP2_pooled_q0.01_peak_40
c	hr1 7396415 7396803 389 7396682 18.00 10.83949 5.58349 8.6323	3 E11.5_MANP_CHIP_HAND2_REP1_REP2_pooled_q0.01_peak_41
c	hr1 7397844 7398495 652 7398156 59.00 63.85201 19.54715 60.81	952 E11.5_MANP_CHIP_HAND2_REP1_REP2_pooled_q0.01_peak_42
c	hr1 7423082 7423398 317 7423286 16.00 10.02746 5.53836 7.8312	7 E11.5_MANP_CHIP_HAND2_REP1_REP2_pooled_q0.01_peak_43
c	hr1 7423593 7424020 428 7423792 84.00 102.48941 27.69180 99.1	5623 E11.5_MANP_CHIP_HAND2_REP1_REP2_pooled_q0.01_peak_44
c	hr1 7429994 7430623 630 7430291 151.00 177.25272 30.37072 173	.46222 E11.5_MANP_CHIP_HAND2_REP1_REP2_pooled_q0.01_peak_45
c	hr1 7617282 7617470 189 7617372 16.00 10.02746 5.53836 7.8312	7 E11.5_MANP_CHIP_HAND2_REP1_REP2_pooled_q0.01_peak_46
c	hr1 7683836 7684101 266 7683963 20.00 13.93124 6.84150 11.605	94 E11.5_MANP_CHIP_HAND2_REP1_REP2_pooled_q0.01_peak_47
c	hr1 7745981 7746249 269 7746119 17.00 10.96977 5.86415 8.7392	2 E11.5_MANP_CHIP_HAND2_REP1_REP2_pooled_q0.01_peak_48
c	hr1 7948247 7948435 189 7948319 9.00 4.21116 3.25786 2.34025	E11.5_MANP_CHIP_HAND2_REP1_REP2_pooled_q0.01_peak_49
c	hr1 7971046 7971756 711 7971384 80.00 96.06576 26.38865 92.77	826 E11.5_MANP_CHIP_HAND2_REP1_REP2_pooled_q0.01_peak_50
c	hr1 7998625 7998814 190 7998727 14.00 8.08274 4.80869 5.99617	E11.5_MANP_CHIP_HAND2_REP1_REP2_pooled_q0.01_peak_51
c	hr1 8169648 8169843 196 8169749 18.00 11.93525 6.18993 9.6714	9 E11.5_MANP_CHIP_HAND2_REP1_REP2_pooled_q0.01_peak_52
c	hr1 8675318 8675760 443 8675520 18.00 11.93525 6.18993 9.6714	9 E11.5_MANP_CHIP_HAND2_REP1_REP2_pooled_q0.01_peak_53
c	hr1 8817001 8817369 369 8817165 25.00 19.25736 8.47043 16.799	00 E11.5_MANP_CHIP_HAND2_REP1_REP2_pooled_q0.01_peak_54
c	hr1 9298358 9298687 330 9298550 12.00 5.09657 3.41802 3.15921	E11.5_MANP_CHIP_HAND2_REP1_REP2_pooled_q0.01_peak_55
c	hr1 9435261 9435652 392 9435474 31.00 26.18317 10.42515 23.59	259 E11.5_MANP_CHIP_HAND2_REP1_REP2_pooled_q0.01_peak_56
c	hr1 9545182 9545469 288 9545298 24.00 16.67390 7.34669 14.285	32 E11.5_MANP_CHIP_HAND2_REP1_REP2_pooled_q0.01_peak_57
c	hr1 9564481 9564813 333 9564644 31.00 26.18317 10.42515 23.59	259 E11.5_MANP_CHIP_HAND2_REP1_REP2_pooled_q0.01_peak_58
c	hr1 9565173 9565501 329 9565333 23.00 17.07331 7.81886 14.666	32 E11.5_MANP_CHIP_HAND2_REP1_REP2_pooled_q0.01_peak_59
c	hr1 9577786 9578357 572 9578019 62.00 60.29136 16.56424 57.29	339 E11.5_MANP_CHIP_HAND2_REP1_REP2_pooled_q0.01_peak_60
c	hr1 9588160 9588476 317 9588331 30.00 24.99298 10.09936 22.42	290 E11.5_MANP_CHIP_HAND2_REP1_REP2_pooled_q0.01_peak_61
c	hr1 9700249 9700735 487 9700377 23.00 17.07331 7.81886 14.666	32 E11.5_MANP_CHIP_HAND2_REP1_REP2_pooled_q0.01_peak_62
c	hr1 9748213 9748614 402 9748420 31.00 25.87334 10.25854 23.29	634 E11.5_MANP_CHIP_HAND2_REP1_REP2_pooled_q0.01_peak_63
c	hr1 9756060 9756560 501 9756325 77.00 86.38688 22.92168 83.17	392 E11.5_MANP_CHIP_HAND2_REP1_REP2_pooled_q0.01_peak_64
c	hr1 9854776 9855118 343 9854873 13.00 7.35325 4.56100 5.27687	E11.5_MANP_CHIP_HAND2_REP1_REP2_pooled_q0.01_peak_65
c	hr1 9876454 9876727 274 9876583 19.00 12.92276 6.51572 10.627	88 E11.5_MANP_CHIP_HAND2_REP1_REP2_pooled_q0.01_peak_66
c	hr1 9881967 9882311 345 9882084 13.00 7.35325 4.56100 5.27687	E11.5_MANP_CHIP_HAND2_REP1_REP2_pooled_q0.01_peak_67
c	hr1 9943912 9944349 438 9944192 15.00 9.10962 5.21257 6.94957	E11.5_MANP_CHIP_HAND2_REP1_REP2_pooled_q0.01_peak_68
c	hr1 9981596 9982003 408 9981804 23.00 12.98876 5.70904 10.692	82 E11.5_MANP_CHIP_HAND2_REP1_REP2_pooled_q0.01_peak_69
c	hr1 9983537 9983735 199 9983694 17.00 6.01528 3.33006 4.02376	E11.5_MANP_CHIP_HAND2_REP1_REP2_pooled_q0.01_peak_70
c	hr1 9988555 9989084 530 9988760 69.00 69.94071 18.40471 66.85	620 E11.5_MANP_CHIP_HAND2_REP1_REP2_pooled_q0.01_peak_71
c	hr1 10009052 10009296 245 10009233 11.00 5.71447 3.90943 3.73	470 E11.5_MANP_CHIP_HAND2_REP1_REP2_pooled_q0.01_peak_72
c	hr1 10011872 10012350 479 10012069 47.00 46.81241 15.63772 43	.94462 E11.5_MANP_CHIP_HAND2_REP1_REP2_pooled_q0.01_peak_73
c	hr1 10014053 10014338 286 10014180 14.00 8.21768 4.88679 6.09	597 E11.5_MANP_CHIP_HAND2_REP1_REP2_pooled_q0.01_peak_74
c	hr1 10014571 10014767 197 10014663 14.00 8.21768 4.88679 6.09	597 E11.5_MANP_CHIP_HAND2_REP1_REP2_pooled_q0.01_peak_75
c	hr1 10018401 10018795 395 10018592 46.00 37.00750 11.18021 34	.26406 E11.5_MANP_CHIP_HAND2_REP1_REP2_pooled_q0.01_peak_76
c	hr1 10019080 10019560 481 10019327 68.00 77.32431 22.47923 74	.17805 E11.5_MANP_CHIP_HAND2_REP1_REP2_pooled_q0.01_peak_77
c	hr1 10037923 10038223 301 10038044 11.00 5.71447 3.90943 3.73	470 E11.5_MANP_CHIP_HAND2_REP1_REP2_pooled_q0.01_peak_78
c	hr1 10039556 10040306 751 10039799 14.00 7.16502 4.28840 5.12	476 E11.5_MANP_CHIP_HAND2_REP1_REP2_pooled_q0.01_peak_79a
c	hr1 10039556 10040306 751 10040188 18.00 9.73159 4.99556 7.56	505 E11.5_MANP_CHIP_HAND2_REP1_REP2_pooled_q0.01_peak_79b
c	hr1 10232858 10233416 559 10233049 23.00 17.07331 7.81886 14.	66632 E11.5_MANP_CHIP_HAND2_REP1_REP2_pooled_q0.01_peak_80
c	hr1 10337712 10337989 278 10337860 19.00 12.92276 6.51572 10.	62788 E11.5_MANP_CHIP_HAND2_REP1_REP2_pooled_q0.01_peak_81
c	hr1 10348247 10349027 781 10348697 138.00 187.09691 40.84761	183.24692 E11.5_MANP_CHIP_HAND2_REP1_REP2_pooled_q0.01_peak_82
c	hr1 10564442 10564904 463 10564658 49.00 49.57059 16.28929 46	.67432 E11.5_MANP_CHIP_HAND2_REP1_REP2_pooled_q0.01_peak_83
c	hr1 10565416 10565770 355 10565569 31.00 26.18317 10.42515 23	.59259 E11.5_MANP_CHIP_HAND2_REP1_REP2_pooled_q0.01_peak_84
c	hr1 10591119 10591307 189 10591272 15.00 8.54642 4.89187 6.42	355 E11.5_MANP_CHIP_HAND2_REP1_REP2_pooled_q0.01_peak_85
c	hr1 10591505 10591780 276 10591595 16.00 5.93889 3.39673 3.94	762 E11.5_MANP_CHIP_HAND2_REP1_REP2_pooled_q0.01_peak_86
c	hr1 10622476 10622870 395 10622682 33.00 28.60308 11.07672 25	.97338 E11.5_MANP_CHIP_HAND2_REP1_REP2_pooled_q0.01_peak_87
c	hr1 10681542 10682009 468 10681707 31.00 20.58585 7.61206 18.	10260 E11.5_MANP_CHIP_HAND2_REP1_REP2_pooled_q0.01_peak_88
c	hr1 10693971 10694187 217 10694121 11.00 5.71447 3.90943 3.73	470 E11.5_MANP_CHIP_HAND2_REP1_REP2_pooled_q0.01_peak_89
c	hr1 10699014 10699365 352 10699160 24.00 18.15687 8.14465 15.	72300 E11.5_MANP_CHIP_HAND2_REP1_REP2_pooled_q0.01_peak_90
c	hr1 10706675 10707236 562 10706941 44.00 39.96506 13.22405 37	.18430 E11.5_MANP_CHIP_HAND2_REP1_REP2_pooled_q0.01_peak_91
c	hr1 10709719 10710611 893 10709888 46.00 39.56305 12.35745 36	.78513 E11.5_MANP_CHIP_HAND2_REP1_REP2_pooled_q0.01_peak_92a
c	hr1 10709719 10710611 893 10710280 120.00 155.87425 35.55799	152.20760 E11.5_MANP_CHIP_HAND2_REP1_REP2_pooled_q0.01_peak_92b
c	hr1 10717148 10717533 386 10717325 45.00 42.96674 14.39731 40	.14423 E11.5_MANP_CHIP_HAND2_REP1_REP2_pooled_q0.01_peak_93
c	hr1 10794519 10794707 189 10794610 15.00 9.10962 5.21257 6.94	957 E11.5_MANP_CHIP_HAND2_REP1_REP2_pooled_q0.01_peak_94
c	hr1 10809677 10810134 458 10809889 37.00 33.59076 12.37986 30	.88588 E11.5_MANP_CHIP_HAND2_REP1_REP2_pooled_q0.01_peak_95
c	hr1 10810382 10810687 306 10810520 43.00 35.91623 11.56868 33	.18726 E11.5_MANP_CHIP_HAND2_REP1_REP2_pooled_q0.01_peak_96
c	hr1 10820293 10820598 306 10820451 44.00 39.96506 13.22405 37	.18430 E11.5_MANP_CHIP_HAND2_REP1_REP2_pooled_q0.01_peak_97
c	hr1 10841747 10842191 445 10841937 61.00 58.93940 16.30132 55	.95416 E11.5_MANP_CHIP_HAND2_REP1_REP2_pooled_q0.01_peak_98
c	hr1 10930172 10930425 254 10930309 17.00 10.96977 5.86415 8.7	3922 E11.5_MANP_CHIP_HAND2_REP1_REP2_pooled_q0.01_peak_99
c	hr1 10994242 10994540 299 10994387 25.00 19.25736 8.47043 16.	79900 E11.5_MANP_CHIP_HAND2_REP1_REP2_pooled_q0.01_peak_100
c	hr1 11016999 11017285 287 11017114 21.00 11.25269 5.23329 9.0	1923 E11.5_MANP_CHIP_HAND2_REP1_REP2_pooled_q0.01_peak_101
c	hr1 11025055 11025562 508 11025267 25.00 19.25736 8.47043 16.	79900 E11.5_MANP_CHIP_HAND2_REP1_REP2_pooled_q0.01_peak_102
c	hr1 11125111 11125457 347 11125310 30.00 24.99298 10.09936 22	.42290 E11.5_MANP_CHIP_HAND2_REP1_REP2_pooled_q0.01_peak_103
c	hr1 11199845 11200045 201 11199952 13.00 7.35325 4.56100 5.27	687 E11.5_MANP_CHIP_HAND2_REP1_REP2_pooled_q0.01_peak_104
c	hr1 11245850 11246377 528 11246122 97.00 117.69530 28.79903 1	14.26173 E11.5_MANP_CHIP_HAND2_REP1_REP2_pooled_q0.01_peak_105
c	hr1 11251936 11252194 259 11252060 20.00 13.93124 6.84150 11.	60594 E11.5_MANP_CHIP_HAND2_REP1_REP2_pooled_q0.01_peak_106
c	hr1 11329412 11329863 452 11329554 16.00 10.02746 5.53836 7.8	3127 E11.5_MANP_CHIP_HAND2_REP1_REP2_pooled_q0.01_peak_107
c	hr1 11330140 11330577 438 11330409 24.00 13.88344 5.94692 11.	57774 E11.5_MANP_CHIP_HAND2_REP1_REP2_pooled_q0.01_peak_108
c	hr1 11350967 11351156 190 11351080 15.00 9.10962 5.21257 6.94	957 E11.5_MANP_CHIP_HAND2_REP1_REP2_pooled_q0.01_peak_109
c	hr1 11355252 11355982 731 11355705 94.00 118.89616 30.94966 1	15.45497 E11.5_MANP_CHIP_HAND2_REP1_REP2_pooled_q0.01_peak_110
c	hr1 11413845 11414352 508 11413997 27.00 19.82969 8.22830 17.	36616 E11.5_MANP_CHIP_HAND2_REP1_REP2_pooled_q0.01_peak_111
c	hr1 11590336 11590977 642 11590671 45.00 41.24759 13.51791 38	.45098 E11.5_MANP_CHIP_HAND2_REP1_REP2_pooled_q0.01_peak_112
c	hr1 11619272 11619516 245 11619386 11.00 5.06783 3.52641 3.13	367 E11.5_MANP_CHIP_HAND2_REP1_REP2_pooled_q0.01_peak_113
c	hr1 11621035 11621245 211 11621164 19.00 7.98289 3.99615 5.89	916 E11.5_MANP_CHIP_HAND2_REP1_REP2_pooled_q0.01_peak_114
c	hr1 11622755 11622945 191 11622849 13.00 6.99209 4.35087 4.95	311 E11.5_MANP_CHIP_HAND2_REP1_REP2_pooled_q0.01_peak_115
c	hr1 11623546 11623782 237 11623681 11.00 5.61015 3.84695 3.66	624 E11.5_MANP_CHIP_HAND2_REP1_REP2_pooled_q0.01_peak_116
c	hr1 11624281 11624601 321 11624476 17.00 6.59778 3.59653 4.56	028 E11.5_MANP_CHIP_HAND2_REP1_REP2_pooled_q0.01_peak_117
c	hr1 11650140 11650377 238 11650230 12.00 5.80770 3.82028 3.81	936 E11.5_MANP_CHIP_HAND2_REP1_REP2_pooled_q0.01_peak_118
c	hr1 11658392 11658590 199 11658484 18.00 11.93525 6.18993 9.6	7149 E11.5_MANP_CHIP_HAND2_REP1_REP2_pooled_q0.01_peak_119
c	hr1 11696761 11697097 337 11696913 18.00 11.93525 6.18993 9.6	7149 E11.5_MANP_CHIP_HAND2_REP1_REP2_pooled_q0.01_peak_120
c	hr1 11748333 11748569 237 11748461 23.00 17.07331 7.81886 14.	66632 E11.5_MANP_CHIP_HAND2_REP1_REP2_pooled_q0.01_peak_121
c	hr1 11769936 11770180 245 11770059 16.00 10.02746 5.53836 7.8	3127 E11.5_MANP_CHIP_HAND2_REP1_REP2_pooled_q0.01_peak_122
c	hr1 11845448 11845837 390 11845653 59.00 63.85201 19.54715 60	.81952 E11.5_MANP_CHIP_HAND2_REP1_REP2_pooled_q0.01_peak_123
c	hr1 11895752 11896287 536 11896101 29.00 22.01025 8.81603 19.	50099 E11.5_MANP_CHIP_HAND2_REP1_REP2_pooled_q0.01_peak_124
c	hr1 11933759 11934092 334 11933980 13.00 7.35325 4.56100 5.27	687 E11.5_MANP_CHIP_HAND2_REP1_REP2_pooled_q0.01_peak_125
c	hr1 11969046 11969347 302 11969189 16.00 10.02746 5.53836 7.8	3127 E11.5_MANP_CHIP_HAND2_REP1_REP2_pooled_q0.01_peak_126
c	hr1 11996558 11997131 574 11996894 59.00 63.85201 19.54715 60	.81952 E11.5_MANP_CHIP_HAND2_REP1_REP2_pooled_q0.01_peak_127
c	hr1 11997419 11997884 466 11997712 18.00 11.93525 6.18993 9.6	7149 E11.5_MANP_CHIP_HAND2_REP1_REP2_pooled_q0.01_peak_128
c	hr1 12026715 12027131 417 12026967 14.00 8.21768 4.88679 6.09	597 E11.5_MANP_CHIP_HAND2_REP1_REP2_pooled_q0.01_peak_129
c	hr1 12027645 12028146 502 12027821 34.00 29.83204 11.40250 27	.18352 E11.5_MANP_CHIP_HAND2_REP1_REP2_pooled_q0.01_peak_130
c	hr1 12029493 12030390 898 12029780 59.00 52.94779 14.27261 50	.02051 E11.5_MANP_CHIP_HAND2_REP1_REP2_pooled_q0.01_peak_131a
c	hr1 12029493 12030390 898 12030242 21.00 13.33959 6.28966 11.	04069 E11.5_MANP_CHIP_HAND2_REP1_REP2_pooled_q0.01_peak_131b
c	hr1 12032467 12033263 797 12032811 137.00 176.26859 36.28357	172.48141 E11.5_MANP_CHIP_HAND2_REP1_REP2_pooled_q0.01_peak_132
c	hr1 12052607 12052810 204 12052712 11.00 5.71447 3.90943 3.73	470 E11.5_MANP_CHIP_HAND2_REP1_REP2_pooled_q0.01_peak_133
c	hr1 12054126 12054490 365 12054319 34.00 29.83204 11.40250 27	.18352 E11.5_MANP_CHIP_HAND2_REP1_REP2_pooled_q0.01_peak_134
c	hr1 12066845 12067164 320 12067032 28.00 22.65424 9.44779 20.	12667 E11.5_MANP_CHIP_HAND2_REP1_REP2_pooled_q0.01_peak_135
c	hr1 12125893 12126187 295 12126030 29.00 23.81653 9.77358 21.	26746 E11.5_MANP_CHIP_HAND2_REP1_REP2_pooled_q0.01_peak_136
c	hr1 12137398 12137663 266 12137526 15.00 9.10962 5.21257 6.94	957 E11.5_MANP_CHIP_HAND2_REP1_REP2_pooled_q0.01_peak_137
c	hr1 12150716 12150955 240 12150837 20.00 13.93124 6.84150 11.	60594 E11.5_MANP_CHIP_HAND2_REP1_REP2_pooled_q0.01_peak_138
c	hr1 12250549 12250978 430 12250780 35.00 31.07319 11.72829 28	.40628 E11.5_MANP_CHIP_HAND2_REP1_REP2_pooled_q0.01_peak_139
c	hr1 12284791 12286589 1799 12284883 10.00 4.94456 3.58364 3.0	1655 E11.5_MANP_CHIP_HAND2_REP1_REP2_pooled_q0.01_peak_140a
c	hr1 12284791 12286589 1799 12285734 165.00 215.39560 39.48756	211.38641 E11.5_MANP_CHIP_HAND2_REP1_REP2_pooled_q0.01_peak_140b
c	hr1 12284791 12286589 1799 12286430 18.00 11.93525 6.18993 9.	67149 E11.5_MANP_CHIP_HAND2_REP1_REP2_pooled_q0.01_peak_140c
c	hr1 12398374 12398575 202 12398480 13.00 7.35325 4.56100 5.27	687 E11.5_MANP_CHIP_HAND2_REP1_REP2_pooled_q0.01_peak_141
c	hr1 12438001 12438189 189 12438101 16.00 10.02746 5.53836 7.8	3127 E11.5_MANP_CHIP_HAND2_REP1_REP2_pooled_q0.01_peak_142
c	hr1 12479147 12479509 363 12479315 21.00 14.95972 7.16729 12.	60612 E11.5_MANP_CHIP_HAND2_REP1_REP2_pooled_q0.01_peak_143
c	hr1 12489526 12489714 189 12489629 12.00 5.09657 3.41802 3.15	921 E11.5_MANP_CHIP_HAND2_REP1_REP2_pooled_q0.01_peak_144
c	hr1 12500421 12500840 420 12500632 43.00 41.40486 14.33458 38	.59886 E11.5_MANP_CHIP_HAND2_REP1_REP2_pooled_q0.01_peak_145
c	hr1 12505125 12505498 374 12505287 39.00 36.15333 13.03143 33	.41379 E11.5_MANP_CHIP_HAND2_REP1_REP2_pooled_q0.01_peak_146
c	hr1 12510124 12510512 389 12510350 20.00 11.46573 5.52141 9.2	2995 E11.5_MANP_CHIP_HAND2_REP1_REP2_pooled_q0.01_peak_147
c	hr1 12525649 12526636 988 12525896 87.00 101.79536 25.86036 9	8.46981 E11.5_MANP_CHIP_HAND2_REP1_REP2_pooled_q0.01_peak_148a
c	hr1 12525649 12526636 988 12526366 59.00 63.85201 19.54715 60	.81952 E11.5_MANP_CHIP_HAND2_REP1_REP2_pooled_q0.01_peak_148b
c	hr1 12529050 12529298 249 12529177 16.00 10.02746 5.53836 7.8	3127 E11.5_MANP_CHIP_HAND2_REP1_REP2_pooled_q0.01_peak_149
c	hr1 12566874 12567338 465 12567131 51.00 52.36312 16.94086 49	.43733 E11.5_MANP_CHIP_HAND2_REP1_REP2_pooled_q0.01_peak_150
c	hr1 12576783 12577581 799 12577174 237.00 344.88605 56.61469	340.06012 E11.5_MANP_CHIP_HAND2_REP1_REP2_pooled_q0.01_peak_151
c	hr1 12578117 12578473 357 12578308 34.00 27.70216 10.28537 25	.08920 E11.5_MANP_CHIP_HAND2_REP1_REP2_pooled_q0.01_peak_152
c	hr1 12582795 12583880 1086 12582962 34.00 23.66673 8.32569 21	.13151 E11.5_MANP_CHIP_HAND2_REP1_REP2_pooled_q0.01_peak_153a
c	hr1 12582795 12583880 1086 12583589 104.00 102.31129 19.42537	98.98383 E11.5_MANP_CHIP_HAND2_REP1_REP2_pooled_q0.01_peak_153b
c	hr1 12690548 12690859 312 12690717 28.00 22.65424 9.44779 20.	12667 E11.5_MANP_CHIP_HAND2_REP1_REP2_pooled_q0.01_peak_154
c	hr1 12692383 12692609 227 12692496 15.00 9.10962 5.21257 6.94	957 E11.5_MANP_CHIP_HAND2_REP1_REP2_pooled_q0.01_peak_155
c	hr1 12692851 12693155 305 12693000 31.00 24.24748 9.40377 21.	69489 E11.5_MANP_CHIP_HAND2_REP1_REP2_pooled_q0.01_peak_156
c	hr1 12693953 12694266 314 12694148 24.00 18.15687 8.14465 15.	72300 E11.5_MANP_CHIP_HAND2_REP1_REP2_pooled_q0.01_peak_157
c	hr1 12697550 12697876 327 12697736 23.00 17.07331 7.81886 14.	66632 E11.5_MANP_CHIP_HAND2_REP1_REP2_pooled_q0.01_peak_158
c	hr1 12698067 12698327 261 12698200 15.00 9.10962 5.21257 6.94	957 E11.5_MANP_CHIP_HAND2_REP1_REP2_pooled_q0.01_peak_159
c	hr1 12718064 12718425 362 12718247 28.00 22.65424 9.44779 20.	12667 E11.5_MANP_CHIP_HAND2_REP1_REP2_pooled_q0.01_peak_160
c	hr1 12721361 12721750 390 12721615 29.00 23.81653 9.77358 21.	26746 E11.5_MANP_CHIP_HAND2_REP1_REP2_pooled_q0.01_peak_161
c	hr1 12748565 12748934 370 12748732 45.00 41.24759 13.51791 38	.45098 E11.5_MANP_CHIP_HAND2_REP1_REP2_pooled_q0.01_peak_162
c	hr1 12764568 12764807 240 12764696 13.00 4.59335 3.04061 2.70	791 E11.5_MANP_CHIP_HAND2_REP1_REP2_pooled_q0.01_peak_163
c	hr1 12776274 12776532 259 12776383 18.00 10.83949 5.58349 8.6	3233 E11.5_MANP_CHIP_HAND2_REP1_REP2_pooled_q0.01_peak_164
c	hr1 12781756 12782207 452 12781868 15.00 9.10962 5.21257 6.94	957 E11.5_MANP_CHIP_HAND2_REP1_REP2_pooled_q0.01_peak_165
c	hr1 12799792 12799988 197 12799941 13.00 6.57881 4.11415 4.54	160 E11.5_MANP_CHIP_HAND2_REP1_REP2_pooled_q0.01_peak_166
c	hr1 12800889 12801197 309 12801049 11.00 5.71447 3.90943 3.73	470 E11.5_MANP_CHIP_HAND2_REP1_REP2_pooled_q0.01_peak_167
c	hr1 12806312 12807055 744 12806397 12.00 6.51816 4.23522 4.49	107 E11.5_MANP_CHIP_HAND2_REP1_REP2_pooled_q0.01_peak_168a
c	hr1 12806312 12807055 744 12806678 25.00 19.25736 8.47043 16.	79900 E11.5_MANP_CHIP_HAND2_REP1_REP2_pooled_q0.01_peak_168b
c	hr1 12806312 12807055 744 12806916 25.00 19.25736 8.47043 16.	79900 E11.5_MANP_CHIP_HAND2_REP1_REP2_pooled_q0.01_peak_168c
c	hr1 12810851 12811428 578 12811051 34.00 23.66673 8.32569 21.	13151 E11.5_MANP_CHIP_HAND2_REP1_REP2_pooled_q0.01_peak_169
c	hr1 12814377 12815278 902 12814789 79.00 90.22848 23.90611 86	.98356 E11.5_MANP_CHIP_HAND2_REP1_REP2_pooled_q0.01_peak_170a
c	hr1 12814377 12815278 902 12815036 57.00 57.31409 17.04432 54	.34378 E11.5_MANP_CHIP_HAND2_REP1_REP2_pooled_q0.01_peak_170b
c	hr1 12845836 12846592 757 12846133 98.00 119.31032 29.09290 1	15.86606 E11.5_MANP_CHIP_HAND2_REP1_REP2_pooled_q0.01_peak_171
c	hr1 12863203 12863501 299 12863339 35.00 28.87856 10.57924 26	.24641 E11.5_MANP_CHIP_HAND2_REP1_REP2_pooled_q0.01_peak_172
c	hr1 12864194 12864477 284 12864308 18.00 11.93525 6.18993 9.6	7149 E11.5_MANP_CHIP_HAND2_REP1_REP2_pooled_q0.01_peak_173
c	hr1 12872172 12872360 189 12872307 11.00 5.71447 3.90943 3.73	470 E11.5_MANP_CHIP_HAND2_REP1_REP2_pooled_q0.01_peak_174
c	hr1 12875407 12876016 610 12875849 34.00 29.83204 11.40250 27	.18352 E11.5_MANP_CHIP_HAND2_REP1_REP2_pooled_q0.01_peak_175
c	hr1 12905817 12906303 487 12906135 21.00 14.95972 7.16729 12.	60612 E11.5_MANP_CHIP_HAND2_REP1_REP2_pooled_q0.01_peak_176
c	hr1 12926434 12926685 252 12926567 18.00 11.93525 6.18993 9.6	7149 E11.5_MANP_CHIP_HAND2_REP1_REP2_pooled_q0.01_peak_177
c	hr1 12950531 12951074 544 12950749 88.00 88.20782 19.32960 84	.97693 E11.5_MANP_CHIP_HAND2_REP1_REP2_pooled_q0.01_peak_178
c	hr1 12991113 12991343 231 12991227 16.00 10.02746 5.53836 7.8	3127 E11.5_MANP_CHIP_HAND2_REP1_REP2_pooled_q0.01_peak_179
c	hr1 12991664 12991854 191 12991776 12.00 6.51816 4.23522 4.49	107 E11.5_MANP_CHIP_HAND2_REP1_REP2_pooled_q0.01_peak_180
c	hr1 12992724 12992916 193 12992843 14.00 8.21768 4.88679 6.09	597 E11.5_MANP_CHIP_HAND2_REP1_REP2_pooled_q0.01_peak_181
c	hr1 13030178 13030416 239 13030282 14.00 7.37914 4.40802 5.29	814 E11.5_MANP_CHIP_HAND2_REP1_REP2_pooled_q0.01_peak_182
c	hr1 13092324 13092723 400 13092517 80.00 96.06576 26.38865 92	.77826 E11.5_MANP_CHIP_HAND2_REP1_REP2_pooled_q0.01_peak_183
c	hr1 13095869 13096170 302 13096031 20.00 13.93124 6.84150 11.	60594 E11.5_MANP_CHIP_HAND2_REP1_REP2_pooled_q0.01_peak_184
c	hr1 13196709 13197557 849 13196818 13.00 7.35325 4.56100 5.27	687 E11.5_MANP_CHIP_HAND2_REP1_REP2_pooled_q0.01_peak_185a
c	hr1 13196709 13197557 849 13197217 34.00 29.49125 11.22028 26	.85492 E11.5_MANP_CHIP_HAND2_REP1_REP2_pooled_q0.01_peak_185b
c	hr1 13203393 13203590 198 13203493 13.00 7.35325 4.56100 5.27	687 E11.5_MANP_CHIP_HAND2_REP1_REP2_pooled_q0.01_peak_186
c	hr1 13204621 13205237 617 13204880 81.00 97.66383 26.71444 94	.36423 E11.5_MANP_CHIP_HAND2_REP1_REP2_pooled_q0.01_peak_187
c	hr1 13214578 13215096 519 13214757 46.00 45.44663 15.31194 42	.59351 E11.5_MANP_CHIP_HAND2_REP1_REP2_pooled_q0.01_peak_188
c	hr1 13224755 13225136 382 13224971 43.00 41.40486 14.33458 38	.59886 E11.5_MANP_CHIP_HAND2_REP1_REP2_pooled_q0.01_peak_189
c	hr1 13230888 13231210 323 13231062 18.00 11.93525 6.18993 9.6	7149 E11.5_MANP_CHIP_HAND2_REP1_REP2_pooled_q0.01_peak_190
c	hr1 13240514 13240761 248 13240637 23.00 16.84593 7.69391 14.	45660 E11.5_MANP_CHIP_HAND2_REP1_REP2_pooled_q0.01_peak_191
c	hr1 13253505 13253693 189 13253588 15.00 9.10962 5.21257 6.94	957 E11.5_MANP_CHIP_HAND2_REP1_REP2_pooled_q0.01_peak_192
c	hr1 13256050 13256247 198 13256171 15.00 8.20688 4.70188 6.09	597 E11.5_MANP_CHIP_HAND2_REP1_REP2_pooled_q0.01_peak_193
c	hr1 13287043 13287231 189 13287105 10.00 4.94456 3.58364 3.01	655 E11.5_MANP_CHIP_HAND2_REP1_REP2_pooled_q0.01_peak_194
c	hr1 13287344 13287892 549 13287639 106.00 139.18140 34.85909	135.61145 E11.5_MANP_CHIP_HAND2_REP1_REP2_pooled_q0.01_peak_195
c	hr1 13290304 13290549 246 13290424 13.00 7.35325 4.56100 5.27	687 E11.5_MANP_CHIP_HAND2_REP1_REP2_pooled_q0.01_peak_196
c	hr1 13303936 13304230 295 13304093 19.00 12.92276 6.51572 10.	62788 E11.5_MANP_CHIP_HAND2_REP1_REP2_pooled_q0.01_peak_197
c	hr1 13321722 13321952 231 13321817 14.00 8.21768 4.88679 6.09	597 E11.5_MANP_CHIP_HAND2_REP1_REP2_pooled_q0.01_peak_198
c	hr1 13322377 13322618 242 13322501 17.00 10.96977 5.86415 8.7	3922 E11.5_MANP_CHIP_HAND2_REP1_REP2_pooled_q0.01_peak_199
c	hr1 13329396 13330176 781 13329563 32.00 27.38667 10.75093 24	.77647 E11.5_MANP_CHIP_HAND2_REP1_REP2_pooled_q0.01_peak_200a
c	hr1 13329396 13330176 781 13329948 73.00 85.03211 24.10815 81	.82499 E11.5_MANP_CHIP_HAND2_REP1_REP2_pooled_q0.01_peak_200b
c	hr1 13332709 13332940 232 13332818 17.00 10.96977 5.86415 8.7	3922 E11.5_MANP_CHIP_HAND2_REP1_REP2_pooled_q0.01_peak_201
c	hr1 13336990 13337333 344 13337161 45.00 44.08999 14.98615 41	.25264 E11.5_MANP_CHIP_HAND2_REP1_REP2_pooled_q0.01_peak_202
c	hr1 13340571 13340972 402 13340804 67.00 75.80114 22.15344 72	.66726 E11.5_MANP_CHIP_HAND2_REP1_REP2_pooled_q0.01_peak_203
c	hr1 13364656 13365019 364 13364867 15.00 9.10962 5.21257 6.94	957 E11.5_MANP_CHIP_HAND2_REP1_REP2_pooled_q0.01_peak_204
c	hr1 13372505 13373517 1013 13372598 13.00 4.11191 2.79730 2.2	8614 E11.5_MANP_CHIP_HAND2_REP1_REP2_pooled_q0.01_peak_205a
c	hr1 13372505 13373517 1013 13372983 19.00 12.92276 6.51572 10	.62788 E11.5_MANP_CHIP_HAND2_REP1_REP2_pooled_q0.01_peak_205b
c	hr1 13373959 13374244 286 13374096 18.00 11.50079 5.94671 9.2	6441 E11.5_MANP_CHIP_HAND2_REP1_REP2_pooled_q0.01_peak_206
c	hr1 13385181 13385693 513 13385423 122.00 138.14742 26.71394	134.58568 E11.5_MANP_CHIP_HAND2_REP1_REP2_pooled_q0.01_peak_207
c	hr1 13471883 13472136 254 13472010 11.00 5.06783 3.52641 3.13	367 E11.5_MANP_CHIP_HAND2_REP1_REP2_pooled_q0.01_peak_208
c	hr1 13493953 13494471 519 13494096 26.00 20.37413 8.79622 17.	89234 E11.5_MANP_CHIP_HAND2_REP1_REP2_pooled_q0.01_peak_209
c	hr1 13561383 13561931 549 13561685 34.00 29.83204 11.40250 27	.18352 E11.5_MANP_CHIP_HAND2_REP1_REP2_pooled_q0.01_peak_210
c	hr1 13589297 13589621 325 13589412 11.00 4.42234 3.15509 2.54	071 E11.5_MANP_CHIP_HAND2_REP1_REP2_pooled_q0.01_peak_211
c	hr1 13589744 13590127 384 13590007 16.00 10.02746 5.53836 7.8	3127 E11.5_MANP_CHIP_HAND2_REP1_REP2_pooled_q0.01_peak_212
c	hr1 13604510 13605004 495 13604789 40.00 37.45079 13.35722 34	.69261 E11.5_MANP_CHIP_HAND2_REP1_REP2_pooled_q0.01_peak_213
c	hr1 13631832 13632321 490 13632064 17.00 9.93841 5.28962 7.76	693 E11.5_MANP_CHIP_HAND2_REP1_REP2_pooled_q0.01_peak_214
c	hr1 13643007 13643435 429 13643234 79.00 94.47301 26.06287 91	.19659 E11.5_MANP_CHIP_HAND2_REP1_REP2_pooled_q0.01_peak_215
c	hr1 13656002 13656496 495 13656321 34.00 23.66673 8.32569 21.	13151 E11.5_MANP_CHIP_HAND2_REP1_REP2_pooled_q0.01_peak_216
c	hr1 13684441 13684765 325 13684609 25.00 17.70976 7.64056 15.	29538 E11.5_MANP_CHIP_HAND2_REP1_REP2_pooled_q0.01_peak_217
c	hr1 13708652 13709002 351 13708743 15.00 8.20688 4.70188 6.09	597 E11.5_MANP_CHIP_HAND2_REP1_REP2_pooled_q0.01_peak_218
c	hr1 13770808 13771913 1106 13771185 303.00 430.54688 56.24107	424.88489 E11.5_MANP_CHIP_HAND2_REP1_REP2_pooled_q0.01_peak_219
c	hr1 13779419 13779627 209 13779516 12.00 6.51816 4.23522 4.49	107 E11.5_MANP_CHIP_HAND2_REP1_REP2_pooled_q0.01_peak_220
c	hr1 13781355 13781730 376 13781474 18.00 10.83949 5.58349 8.6	3233 E11.5_MANP_CHIP_HAND2_REP1_REP2_pooled_q0.01_peak_221
c	hr1 13789286 13789592 307 13789455 14.00 7.37914 4.40802 5.29	814 E11.5_MANP_CHIP_HAND2_REP1_REP2_pooled_q0.01_peak_222
c	hr1 13830559 13830775 217 13830662 14.00 8.21768 4.88679 6.09	597 E11.5_MANP_CHIP_HAND2_REP1_REP2_pooled_q0.01_peak_223
c	hr1 13835052 13835551 500 13835258 50.00 50.96264 16.61508 48	.05222 E11.5_MANP_CHIP_HAND2_REP1_REP2_pooled_q0.01_peak_224
c	hr1 13859457 13859680 224 13859572 17.00 10.80408 5.77043 8.6	0043 E11.5_MANP_CHIP_HAND2_REP1_REP2_pooled_q0.01_peak_225
c	hr1 13860979 13862293 1315 13861344 83.00 85.41858 19.98166 8	2.21017 E11.5_MANP_CHIP_HAND2_REP1_REP2_pooled_q0.01_peak_226a
c	hr1 13860979 13862293 1315 13862136 54.00 56.61350 17.91822 5	3.64691 E11.5_MANP_CHIP_HAND2_REP1_REP2_pooled_q0.01_peak_226b
c	hr1 13863730 13864215 486 13863878 27.00 21.50661 9.12200 19.	00221 E11.5_MANP_CHIP_HAND2_REP1_REP2_pooled_q0.01_peak_227
c	hr1 13904942 13905689 748 13905296 156.00 229.37132 51.14838	225.27917 E11.5_MANP_CHIP_HAND2_REP1_REP2_pooled_q0.01_peak_228
c	hr1 13911938 13912584 647 13912260 92.00 104.74656 24.96725 1	01.40112 E11.5_MANP_CHIP_HAND2_REP1_REP2_pooled_q0.01_peak_229
c	hr1 13927972 13928403 432 13928190 43.00 41.40486 14.33458 38	.59886 E11.5_MANP_CHIP_HAND2_REP1_REP2_pooled_q0.01_peak_230
c	hr1 14004516 14004922 407 14004771 20.00 13.93124 6.84150 11.	60594 E11.5_MANP_CHIP_HAND2_REP1_REP2_pooled_q0.01_peak_231
c	hr1 14037934 14038667 734 14038314 125.00 156.17514 33.12848	152.50706 E11.5_MANP_CHIP_HAND2_REP1_REP2_pooled_q0.01_peak_232
c	hr1 14054705 14055002 298 14054850 22.00 16.00735 7.49307 13.	62655 E11.5_MANP_CHIP_HAND2_REP1_REP2_pooled_q0.01_peak_233
c	hr1 14126612 14126960 349 14126918 12.00 6.51816 4.23522 4.49	107 E11.5_MANP_CHIP_HAND2_REP1_REP2_pooled_q0.01_peak_234
c	hr1 14146011 14146252 242 14146134 18.00 11.93525 6.18993 9.6	7149 E11.5_MANP_CHIP_HAND2_REP1_REP2_pooled_q0.01_peak_235
c	hr1 14150782 14151562 781 14150898 19.00 12.92276 6.51572 10.	62788 E11.5_MANP_CHIP_HAND2_REP1_REP2_pooled_q0.01_peak_236a
c	hr1 14150782 14151562 781 14151391 24.00 18.15687 8.14465 15.	72300 E11.5_MANP_CHIP_HAND2_REP1_REP2_pooled_q0.01_peak_236b
c	hr1 14162161 14163303 1143 14162427 16.00 10.02746 5.53836 7.	83127 E11.5_MANP_CHIP_HAND2_REP1_REP2_pooled_q0.01_peak_237a
c	hr1 14162161 14163303 1143 14162594 15.00 9.10962 5.21257 6.9	4957 E11.5_MANP_CHIP_HAND2_REP1_REP2_pooled_q0.01_peak_237b
c	hr1 14162161 14163303 1143 14163085 51.00 52.36312 16.94086 4	9.43733 E11.5_MANP_CHIP_HAND2_REP1_REP2_pooled_q0.01_peak_237c
c	hr1 14165645 14166282 638 14166007 72.00 83.47858 23.78237 80	.28316 E11.5_MANP_CHIP_HAND2_REP1_REP2_pooled_q0.01_peak_238
c	hr1 14184844 14185336 493 14185115 49.00 46.46898 14.69338 43	.61047 E11.5_MANP_CHIP_HAND2_REP1_REP2_pooled_q0.01_peak_239
c	hr1 14185882 14186206 325 14186039 18.00 11.93525 6.18993 9.6	7149 E11.5_MANP_CHIP_HAND2_REP1_REP2_pooled_q0.01_peak_240
c	hr1 14198953 14199188 236 14199060 20.00 12.70653 6.17122 10.	43389 E11.5_MANP_CHIP_HAND2_REP1_REP2_pooled_q0.01_peak_241
c	hr1 14207310 14207634 325 14207466 22.00 16.00735 7.49307 13.	62655 E11.5_MANP_CHIP_HAND2_REP1_REP2_pooled_q0.01_peak_242
c	hr1 14207940 14208249 310 14208011 12.00 6.51816 4.23522 4.49	107 E11.5_MANP_CHIP_HAND2_REP1_REP2_pooled_q0.01_peak_243
c	hr1 14216744 14217018 275 14216888 10.00 4.94456 3.58364 3.01	655 E11.5_MANP_CHIP_HAND2_REP1_REP2_pooled_q0.01_peak_244
c	hr1 14225375 14225667 293 14225494 19.00 12.92276 6.51572 10.	62788 E11.5_MANP_CHIP_HAND2_REP1_REP2_pooled_q0.01_peak_245
c	hr1 14244971 14245169 199 14245099 10.00 4.94456 3.58364 3.01	655 E11.5_MANP_CHIP_HAND2_REP1_REP2_pooled_q0.01_peak_246
c	hr1 14262487 14262696 210 14262596 14.00 8.21768 4.88679 6.09	597 E11.5_MANP_CHIP_HAND2_REP1_REP2_pooled_q0.01_peak_247
c	hr1 14274089 14274355 267 14274235 18.00 11.93525 6.18993 9.6	7149 E11.5_MANP_CHIP_HAND2_REP1_REP2_pooled_q0.01_peak_248
c	hr1 14293784 14294239 456 14293939 18.00 11.93525 6.18993 9.6	7149 E11.5_MANP_CHIP_HAND2_REP1_REP2_pooled_q0.01_peak_249
c	hr1 14305317 14305635 319 14305483 21.00 14.95972 7.16729 12.	60612 E11.5_MANP_CHIP_HAND2_REP1_REP2_pooled_q0.01_peak_250
c	hr1 14309529 14310676 1148 14309728 25.00 17.70976 7.64056 15	.29538 E11.5_MANP_CHIP_HAND2_REP1_REP2_pooled_q0.01_peak_251a
c	hr1 14309529 14310676 1148 14310555 19.00 9.59281 4.75754 7.4	2940 E11.5_MANP_CHIP_HAND2_REP1_REP2_pooled_q0.01_peak_251b
c	hr1 14357607 14358206 600 14357892 39.00 33.69965 11.75471 30	.99229 E11.5_MANP_CHIP_HAND2_REP1_REP2_pooled_q0.01_peak_252
c	hr1 14422759 14423051 293 14422907 17.00 10.96977 5.86415 8.7	3922 E11.5_MANP_CHIP_HAND2_REP1_REP2_pooled_q0.01_peak_253
c	hr1 14456878 14457336 459 14457065 46.00 42.53944 13.81178 39	.72720 E11.5_MANP_CHIP_HAND2_REP1_REP2_pooled_q0.01_peak_254
c	hr1 14459484 14459748 265 14459583 12.00 6.23571 4.06880 4.24	234 E11.5_MANP_CHIP_HAND2_REP1_REP2_pooled_q0.01_peak_255
c	hr1 14472217 14472523 307 14472351 17.00 9.93841 5.28962 7.76	693 E11.5_MANP_CHIP_HAND2_REP1_REP2_pooled_q0.01_peak_256
c	hr1 14485784 14486148 365 14485944 26.00 20.37413 8.79622 17.	89234 E11.5_MANP_CHIP_HAND2_REP1_REP2_pooled_q0.01_peak_257
c	hr1 14488791 14489023 233 14488892 10.00 4.94456 3.58364 3.01	655 E11.5_MANP_CHIP_HAND2_REP1_REP2_pooled_q0.01_peak_258
c	hr1 14489688 14490450 763 14490102 25.00 19.25736 8.47043 16.	79900 E11.5_MANP_CHIP_HAND2_REP1_REP2_pooled_q0.01_peak_259
c	hr1 14495468 14495940 473 14495774 39.00 29.04088 9.51507 26.	40592 E11.5_MANP_CHIP_HAND2_REP1_REP2_pooled_q0.01_peak_260
c	hr1 14500087 14500435 349 14500257 37.00 33.59076 12.37986 30	.88588 E11.5_MANP_CHIP_HAND2_REP1_REP2_pooled_q0.01_peak_261
c	hr1 14503272 14503827 556 14503596 23.00 15.65495 7.05282 13.	29422 E11.5_MANP_CHIP_HAND2_REP1_REP2_pooled_q0.01_peak_262
c	hr1 14504452 14504818 367 14504608 16.00 10.02746 5.53836 7.8	3127 E11.5_MANP_CHIP_HAND2_REP1_REP2_pooled_q0.01_peak_263
c	hr1 14506459 14506970 512 14506789 26.00 20.37413 8.79622 17.	89234 E11.5_MANP_CHIP_HAND2_REP1_REP2_pooled_q0.01_peak_264
c	hr1 14508275 14508540 266 14508373 13.00 7.35325 4.56100 5.27	687 E11.5_MANP_CHIP_HAND2_REP1_REP2_pooled_q0.01_peak_265
c	hr1 14511683 14511996 314 14511833 19.00 12.92276 6.51572 10.	62788 E11.5_MANP_CHIP_HAND2_REP1_REP2_pooled_q0.01_peak_266
c	hr1 14512132 14513051 920 14512354 60.00 61.50711 17.92593 58	.49764 E11.5_MANP_CHIP_HAND2_REP1_REP2_pooled_q0.01_peak_267a
c	hr1 14512132 14513051 920 14512841 31.00 26.18317 10.42515 23	.59259 E11.5_MANP_CHIP_HAND2_REP1_REP2_pooled_q0.01_peak_267b
c	hr1 14513404 14514181 778 14513739 37.00 28.89180 9.99113 26.	25820 E11.5_MANP_CHIP_HAND2_REP1_REP2_pooled_q0.01_peak_268
c	hr1 14566941 14567379 439 14567211 43.00 41.40486 14.33458 38	.59886 E11.5_MANP_CHIP_HAND2_REP1_REP2_pooled_q0.01_peak_269
c	hr1 14568643 14568969 327 14568803 30.00 24.99298 10.09936 22	.42290 E11.5_MANP_CHIP_HAND2_REP1_REP2_pooled_q0.01_peak_270
c	hr1 14569844 14570606 763 14570194 62.00 48.60902 11.65522 45	.72478 E11.5_MANP_CHIP_HAND2_REP1_REP2_pooled_q0.01_peak_271
c	hr1 14571083 14571689 607 14571374 92.00 115.57684 30.29808 1	12.15672 E11.5_MANP_CHIP_HAND2_REP1_REP2_pooled_q0.01_peak_272
c	hr1 14574916 14575453 538 14575208 84.00 102.48941 27.69180 9	9.15623 E11.5_MANP_CHIP_HAND2_REP1_REP2_pooled_q0.01_peak_273
c	hr1 14609119 14609442 324 14609275 33.00 28.60308 11.07672 25	.97338 E11.5_MANP_CHIP_HAND2_REP1_REP2_pooled_q0.01_peak_274
c	hr1 14620587 14621602 1016 14621259 156.00 208.99295 41.27914	205.01768 E11.5_MANP_CHIP_HAND2_REP1_REP2_pooled_q0.01_peak_275
c	hr1 14635664 14636177 514 14635895 85.00 104.10816 28.01758 1	00.76418 E11.5_MANP_CHIP_HAND2_REP1_REP2_pooled_q0.01_peak_276
c	hr1 14777945 14778300 356 14778134 28.00 22.65424 9.44779 20.	12667 E11.5_MANP_CHIP_HAND2_REP1_REP2_pooled_q0.01_peak_277
c	hr1 14795280 14795507 228 14795389 14.00 6.53621 3.94387 4.50	495 E11.5_MANP_CHIP_HAND2_REP1_REP2_pooled_q0.01_peak_278
c	hr1 14925834 14926245 412 14926063 66.00 74.28429 21.82765 71	.16251 E11.5_MANP_CHIP_HAND2_REP1_REP2_pooled_q0.01_peak_279
c	hr1 14947545 14947868 324 14947687 25.00 19.25736 8.47043 16.	79900 E11.5_MANP_CHIP_HAND2_REP1_REP2_pooled_q0.01_peak_280
c	hr1 15033052 15033312 261 15033189 15.00 9.10962 5.21257 6.94	957 E11.5_MANP_CHIP_HAND2_REP1_REP2_pooled_q0.01_peak_281
c	hr1 15033954 15034623 670 15034235 152.00 221.86774 49.84524	217.81973 E11.5_MANP_CHIP_HAND2_REP1_REP2_pooled_q0.01_peak_282
c	hr1 15038036 15038246 211 15038126 11.00 5.71447 3.90943 3.73	470 E11.5_MANP_CHIP_HAND2_REP1_REP2_pooled_q0.01_peak_283
c	hr1 15118573 15118874 302 15118723 35.00 31.07319 11.72829 28	.40628 E11.5_MANP_CHIP_HAND2_REP1_REP2_pooled_q0.01_peak_284
c	hr1 15189008 15189244 237 15189120 16.00 10.02746 5.53836 7.8	3127 E11.5_MANP_CHIP_HAND2_REP1_REP2_pooled_q0.01_peak_285
c	hr1 15189391 15189799 409 15189581 38.00 34.86656 12.70565 32	.14407 E11.5_MANP_CHIP_HAND2_REP1_REP2_pooled_q0.01_peak_286
c	hr1 15198248 15198478 231 15198360 15.00 9.10962 5.21257 6.94	957 E11.5_MANP_CHIP_HAND2_REP1_REP2_pooled_q0.01_peak_287
c	hr1 15275731 15276222 492 15275877 15.00 9.10962 5.21257 6.94	957 E11.5_MANP_CHIP_HAND2_REP1_REP2_pooled_q0.01_peak_288
c	hr1 15286682 15286979 298 15286870 16.00 10.02746 5.53836 7.8	3127 E11.5_MANP_CHIP_HAND2_REP1_REP2_pooled_q0.01_peak_289
c	hr1 15357994 15358775 782 15358333 81.00 94.44552 25.07083 91	.17424 E11.5_MANP_CHIP_HAND2_REP1_REP2_pooled_q0.01_peak_290
c	hr1 15399359 15399547 189 15399449 12.00 6.51816 4.23522 4.49	107 E11.5_MANP_CHIP_HAND2_REP1_REP2_pooled_q0.01_peak_291
c	hr1 15446526 15447091 566 15446853 38.00 32.47765 11.46084 29	.78833 E11.5_MANP_CHIP_HAND2_REP1_REP2_pooled_q0.01_peak_292
c	hr1 15451600 15452175 576 15451745 14.00 8.21768 4.88679 6.09	597 E11.5_MANP_CHIP_HAND2_REP1_REP2_pooled_q0.01_peak_293a
c	hr1 15451600 15452175 576 15452017 13.00 7.35325 4.56100 5.27	687 E11.5_MANP_CHIP_HAND2_REP1_REP2_pooled_q0.01_peak_293b
c	hr1 15471423 15472075 653 15471797 74.00 86.59146 24.43394 83	.37283 E11.5_MANP_CHIP_HAND2_REP1_REP2_pooled_q0.01_peak_294
c	hr1 15551047 15551681 635 15551266 59.00 63.85201 19.54715 60	.81952 E11.5_MANP_CHIP_HAND2_REP1_REP2_pooled_q0.01_peak_295
c	hr1 15613242 15613467 226 15613358 17.00 10.96977 5.86415 8.7	3922 E11.5_MANP_CHIP_HAND2_REP1_REP2_pooled_q0.01_peak_296
c	hr1 15805967 15806188 222 15806045 9.00 4.21116 3.25786 2.340	25 E11.5_MANP_CHIP_HAND2_REP1_REP2_pooled_q0.01_peak_297
c	hr1 15814850 15815295 446 15815098 34.00 29.83204 11.40250 27	.18352 E11.5_MANP_CHIP_HAND2_REP1_REP2_pooled_q0.01_peak_298
c	hr1 15895558 15895788 231 15895668 18.00 11.93525 6.18993 9.6	7149 E11.5_MANP_CHIP_HAND2_REP1_REP2_pooled_q0.01_peak_299
c	hr1 15899772 15900291 520 15900129 20.00 13.93124 6.84150 11.	60594 E11.5_MANP_CHIP_HAND2_REP1_REP2_pooled_q0.01_peak_300
c	hr1 15908750 15909102 353 15908932 34.00 25.52776 9.20236 22.	95247 E11.5_MANP_CHIP_HAND2_REP1_REP2_pooled_q0.01_peak_301
c	hr1 15926077 15927668 1592 15926401 72.00 70.10838 17.36501 6	7.02153 E11.5_MANP_CHIP_HAND2_REP1_REP2_pooled_q0.01_peak_302a
c	hr1 15926077 15927668 1592 15926805 9.00 4.21116 3.25786 2.34	025 E11.5_MANP_CHIP_HAND2_REP1_REP2_pooled_q0.01_peak_302b
c	hr1 15926077 15927668 1592 15927165 40.00 37.45079 13.35722 3	4.69261 E11.5_MANP_CHIP_HAND2_REP1_REP2_pooled_q0.01_peak_302c
c	hr1 15926077 15927668 1592 15927459 31.00 26.18317 10.42515 2	3.59259 E11.5_MANP_CHIP_HAND2_REP1_REP2_pooled_q0.01_peak_302d
c	hr1 15967635 15967852 218 15967729 15.00 9.10962 5.21257 6.94	957 E11.5_MANP_CHIP_HAND2_REP1_REP2_pooled_q0.01_peak_303
c	hr1 15983226 15983414 189 15983327 13.00 7.35325 4.56100 5.27	687 E11.5_MANP_CHIP_HAND2_REP1_REP2_pooled_q0.01_peak_304
c	hr1 15991094 15991475 382 15991183 15.00 8.75130 5.00776 6.62	658 E11.5_MANP_CHIP_HAND2_REP1_REP2_pooled_q0.01_peak_305
c	hr1 16097914 16098105 192 16098011 15.00 8.34925 4.78122 6.22	705 E11.5_MANP_CHIP_HAND2_REP1_REP2_pooled_q0.01_peak_306
c	hr1 16099463 16099689 227 16099592 13.00 7.35325 4.56100 5.27	687 E11.5_MANP_CHIP_HAND2_REP1_REP2_pooled_q0.01_peak_307
c	hr1 16104665 16105598 934 16104817 17.00 8.89687 4.73264 6.76	843 E11.5_MANP_CHIP_HAND2_REP1_REP2_pooled_q0.01_peak_308a
c	hr1 16104665 16105598 934 16105427 23.00 17.07331 7.81886 14.	66632 E11.5_MANP_CHIP_HAND2_REP1_REP2_pooled_q0.01_peak_308b
c	hr1 16130359 16130576 218 16130469 16.00 9.87203 5.44985 7.70	459 E11.5_MANP_CHIP_HAND2_REP1_REP2_pooled_q0.01_peak_309
c	hr1 16134906 16135352 447 16135161 34.00 29.83204 11.40250 27	.18352 E11.5_MANP_CHIP_HAND2_REP1_REP2_pooled_q0.01_peak_310
c	hr1 16136601 16137149 549 16136842 43.00 38.69205 12.93018 35	.92744 E11.5_MANP_CHIP_HAND2_REP1_REP2_pooled_q0.01_peak_311
c	hr1 16139019 16139608 590 16139422 67.00 71.53269 19.98300 68	.43355 E11.5_MANP_CHIP_HAND2_REP1_REP2_pooled_q0.01_peak_312
c	hr1 16186559 16187501 943 16186814 73.00 71.47221 17.60289 68	.37457 E11.5_MANP_CHIP_HAND2_REP1_REP2_pooled_q0.01_peak_313a
c	hr1 16186559 16187501 943 16187270 44.00 41.01454 13.75838 38	.22011 E11.5_MANP_CHIP_HAND2_REP1_REP2_pooled_q0.01_peak_313b
c	hr1 16192504 16192802 299 16192628 19.00 12.92276 6.51572 10.	62788 E11.5_MANP_CHIP_HAND2_REP1_REP2_pooled_q0.01_peak_314
c	hr1 16200144 16200402 259 16200277 18.00 10.83949 5.58349 8.6	3233 E11.5_MANP_CHIP_HAND2_REP1_REP2_pooled_q0.01_peak_315
c	hr1 16202076 16202370 295 16202213 15.00 9.10962 5.21257 6.94	957 E11.5_MANP_CHIP_HAND2_REP1_REP2_pooled_q0.01_peak_316
c	hr1 16202458 16202688 231 16202585 15.00 7.29785 4.20679 5.25	202 E11.5_MANP_CHIP_HAND2_REP1_REP2_pooled_q0.01_peak_317
c	hr1 16227855 16228096 242 16227986 17.00 10.96977 5.86415 8.7	3922 E11.5_MANP_CHIP_HAND2_REP1_REP2_pooled_q0.01_peak_318
c	hr1 16228273 16228551 279 16228423 19.00 12.92276 6.51572 10.	62788 E11.5_MANP_CHIP_HAND2_REP1_REP2_pooled_q0.01_peak_319
c	hr1 16229383 16230226 844 16229847 281.00 379.94562 48.57225	374.81735 E11.5_MANP_CHIP_HAND2_REP1_REP2_pooled_q0.01_peak_320
c	hr1 16231489 16232447 959 16231894 137.00 185.33456 40.55374	181.49454 E11.5_MANP_CHIP_HAND2_REP1_REP2_pooled_q0.01_peak_321
c	hr1 16240243 16240657 415 16240464 51.00 52.36312 16.94086 49	.43733 E11.5_MANP_CHIP_HAND2_REP1_REP2_pooled_q0.01_peak_322
c	hr1 16248711 16249637 927 16249333 130.00 181.44144 42.67795	177.62502 E11.5_MANP_CHIP_HAND2_REP1_REP2_pooled_q0.01_peak_323
c	hr1 16261821 16262055 235 16261942 15.00 8.20688 4.70188 6.09	597 E11.5_MANP_CHIP_HAND2_REP1_REP2_pooled_q0.01_peak_324
c	hr1 16268698 16268919 222 16268854 14.00 8.21768 4.88679 6.09	597 E11.5_MANP_CHIP_HAND2_REP1_REP2_pooled_q0.01_peak_325
c	hr1 16294209 16294499 291 16294353 29.00 23.10185 9.38955 20.	57260 E11.5_MANP_CHIP_HAND2_REP1_REP2_pooled_q0.01_peak_326
c	hr1 16331275 16331549 275 16331410 22.00 16.00735 7.49307 13.	62655 E11.5_MANP_CHIP_HAND2_REP1_REP2_pooled_q0.01_peak_327
c	hr1 16335955 16336391 437 16336138 37.00 33.59076 12.37986 30	.88588 E11.5_MANP_CHIP_HAND2_REP1_REP2_pooled_q0.01_peak_328
c	hr1 16398259 16399303 1045 16398502 23.00 17.07331 7.81886 14	.66632 E11.5_MANP_CHIP_HAND2_REP1_REP2_pooled_q0.01_peak_329a
c	hr1 16398259 16399303 1045 16399001 126.00 174.25569 41.37481	170.48138 E11.5_MANP_CHIP_HAND2_REP1_REP2_pooled_q0.01_peak_329b
c	hr1 16606582 16607173 592 16606936 21.00 14.95972 7.16729 12.	60612 E11.5_MANP_CHIP_HAND2_REP1_REP2_pooled_q0.01_peak_330
c	hr1 16619213 16619512 300 16619362 19.00 12.92276 6.51572 10.	62788 E11.5_MANP_CHIP_HAND2_REP1_REP2_pooled_q0.01_peak_331
c	hr1 16656527 16657263 737 16656714 29.00 17.23079 6.51559 14.	82147 E11.5_MANP_CHIP_HAND2_REP1_REP2_pooled_q0.01_peak_332a
c	hr1 16656527 16657263 737 16656984 49.00 43.29198 13.14622 40	.46704 E11.5_MANP_CHIP_HAND2_REP1_REP2_pooled_q0.01_peak_332b
c	hr1 16657534 16657737 204 16657637 11.00 5.71447 3.90943 3.73	470 E11.5_MANP_CHIP_HAND2_REP1_REP2_pooled_q0.01_peak_333
c	hr1 16824736 16825106 371 16824914 30.00 21.21470 8.15066 18.	72540 E11.5_MANP_CHIP_HAND2_REP1_REP2_pooled_q0.01_peak_334
c	hr1 16900942 16901676 735 16901246 90.00 106.51622 26.74196 1	03.15801 E11.5_MANP_CHIP_HAND2_REP1_REP2_pooled_q0.01_peak_335
c	hr1 16904719 16905097 379 16904893 93.00 117.23421 30.62387 1	13.80353 E11.5_MANP_CHIP_HAND2_REP1_REP2_pooled_q0.01_peak_336
c	hr1 16956715 16956911 197 16956826 16.00 7.26194 4.04391 5.21	887 E11.5_MANP_CHIP_HAND2_REP1_REP2_pooled_q0.01_peak_337
c	hr1 16983354 16983911 558 16983715 53.00 45.42236 12.84535 42	.57790 E11.5_MANP_CHIP_HAND2_REP1_REP2_pooled_q0.01_peak_338
c	hr1 17009567 17009811 245 17009670 14.00 8.21768 4.88679 6.09	597 E11.5_MANP_CHIP_HAND2_REP1_REP2_pooled_q0.01_peak_339
c	hr1 17070841 17071217 377 17071017 33.00 28.60308 11.07672 25	.97338 E11.5_MANP_CHIP_HAND2_REP1_REP2_pooled_q0.01_peak_340
c	hr1 17096537 17096984 448 17096751 46.00 45.44663 15.31194 42	.59351 E11.5_MANP_CHIP_HAND2_REP1_REP2_pooled_q0.01_peak_341
c	hr1 17172152 17172404 253 17172268 13.00 7.35325 4.56100 5.27	687 E11.5_MANP_CHIP_HAND2_REP1_REP2_pooled_q0.01_peak_342
c	hr1 17230078 17230394 317 17230170 10.00 4.94456 3.58364 3.01	655 E11.5_MANP_CHIP_HAND2_REP1_REP2_pooled_q0.01_peak_343
c	hr1 17237429 17237767 339 17237617 23.00 17.07331 7.81886 14.	66632 E11.5_MANP_CHIP_HAND2_REP1_REP2_pooled_q0.01_peak_344
c	hr1 17240059 17240578 520 17240339 44.00 42.74266 14.66036 39	.92121 E11.5_MANP_CHIP_HAND2_REP1_REP2_pooled_q0.01_peak_345
c	hr1 17305207 17305674 468 17305473 77.00 91.30373 25.41130 88	.04951 E11.5_MANP_CHIP_HAND2_REP1_REP2_pooled_q0.01_peak_346
c	hr1 17450186 17450982 797 17450485 37.00 33.59076 12.37986 30	.88588 E11.5_MANP_CHIP_HAND2_REP1_REP2_pooled_q0.01_peak_347a
c	hr1 17450186 17450982 797 17450840 14.00 8.21768 4.88679 6.09	597 E11.5_MANP_CHIP_HAND2_REP1_REP2_pooled_q0.01_peak_347b
c	hr1 17538358 17538576 219 17538460 16.00 10.02746 5.53836 7.8	3127 E11.5_MANP_CHIP_HAND2_REP1_REP2_pooled_q0.01_peak_348
c	hr1 17726348 17727891 1544 17726573 47.00 46.81241 15.63772 4	3.94462 E11.5_MANP_CHIP_HAND2_REP1_REP2_pooled_q0.01_peak_349a
c	hr1 17726348 17727891 1544 17726843 47.00 43.84041 14.10565 4	1.01270 E11.5_MANP_CHIP_HAND2_REP1_REP2_pooled_q0.01_peak_349b
c	hr1 17726348 17727891 1544 17727332 28.00 22.65424 9.44779 20	.12667 E11.5_MANP_CHIP_HAND2_REP1_REP2_pooled_q0.01_peak_349c
c	hr1 17726348 17727891 1544 17727755 17.00 10.96977 5.86415 8.	73922 E11.5_MANP_CHIP_HAND2_REP1_REP2_pooled_q0.01_peak_349d
c	hr1 18268858 18269451 594 18269062 31.00 24.24748 9.40377 21.	69489 E11.5_MANP_CHIP_HAND2_REP1_REP2_pooled_q0.01_peak_350
c	hr1 18272669 18272929 261 18272809 17.00 10.96977 5.86415 8.7	3922 E11.5_MANP_CHIP_HAND2_REP1_REP2_pooled_q0.01_peak_351
c	hr1 18307429 18307786 358 18307598 36.00 32.32619 12.05408 29	.64147 E11.5_MANP_CHIP_HAND2_REP1_REP2_pooled_q0.01_peak_352
c	hr1 18335708 18335997 290 18335930 10.00 4.94456 3.58364 3.01	655 E11.5_MANP_CHIP_HAND2_REP1_REP2_pooled_q0.01_peak_353
c	hr1 18460368 18460819 452 18460611 73.00 71.47221 17.60289 68	.37457 E11.5_MANP_CHIP_HAND2_REP1_REP2_pooled_q0.01_peak_354
c	hr1 18461802 18462533 732 18462303 42.00 40.07680 14.00879 37	.28658 E11.5_MANP_CHIP_HAND2_REP1_REP2_pooled_q0.01_peak_355
c	hr1 18507930 18508141 212 18508042 15.00 9.10962 5.21257 6.94	957 E11.5_MANP_CHIP_HAND2_REP1_REP2_pooled_q0.01_peak_356
c	hr1 18610326 18610632 307 18610505 21.00 14.95972 7.16729 12.	60612 E11.5_MANP_CHIP_HAND2_REP1_REP2_pooled_q0.01_peak_357
c	hr1 19185236 19185466 231 19185364 16.00 8.08520 4.46972 5.99	627 E11.5_MANP_CHIP_HAND2_REP1_REP2_pooled_q0.01_peak_358
c	hr1 19205650 19205888 239 19205754 15.00 9.10962 5.21257 6.94	957 E11.5_MANP_CHIP_HAND2_REP1_REP2_pooled_q0.01_peak_359
c	hr1 19225336 19225776 441 19225532 65.00 68.63511 19.39527 65	.56114 E11.5_MANP_CHIP_HAND2_REP1_REP2_pooled_q0.01_peak_360
c	hr1 19241305 19241812 508 19241532 43.00 41.40486 14.33458 38	.59886 E11.5_MANP_CHIP_HAND2_REP1_REP2_pooled_q0.01_peak_361
c	hr1 19244721 19244968 248 19244850 16.00 10.02746 5.53836 7.8	3127 E11.5_MANP_CHIP_HAND2_REP1_REP2_pooled_q0.01_peak_362
c	hr1 19292132 19292722 591 19292323 62.00 68.28219 20.52451 65	.21142 E11.5_MANP_CHIP_HAND2_REP1_REP2_pooled_q0.01_peak_363
c	hr1 19336923 19337408 486 19337034 14.00 8.21768 4.88679 6.09	597 E11.5_MANP_CHIP_HAND2_REP1_REP2_pooled_q0.01_peak_364
c	hr1 19507758 19507946 189 19507867 17.00 10.96977 5.86415 8.7	3922 E11.5_MANP_CHIP_HAND2_REP1_REP2_pooled_q0.01_peak_365
c	hr1 19561729 19562395 667 19561919 25.00 19.25736 8.47043 16.	79900 E11.5_MANP_CHIP_HAND2_REP1_REP2_pooled_q0.01_peak_366a
c	hr1 19561729 19562395 667 19562289 18.00 11.93525 6.18993 9.6	7149 E11.5_MANP_CHIP_HAND2_REP1_REP2_pooled_q0.01_peak_366b
c	hr1 19565661 19566272 612 19566035 33.00 28.60308 11.07672 25	.97338 E11.5_MANP_CHIP_HAND2_REP1_REP2_pooled_q0.01_peak_367
c	hr1 19723095 19723425 331 19723263 22.00 16.00735 7.49307 13.	62655 E11.5_MANP_CHIP_HAND2_REP1_REP2_pooled_q0.01_peak_368
c	hr1 19767584 19768010 427 19767833 21.00 14.95972 7.16729 12.	60612 E11.5_MANP_CHIP_HAND2_REP1_REP2_pooled_q0.01_peak_369
c	hr1 19874187 19874380 194 19874279 13.00 7.35325 4.56100 5.27	687 E11.5_MANP_CHIP_HAND2_REP1_REP2_pooled_q0.01_peak_370
c	hr1 19881701 19881901 201 19881802 13.00 7.35325 4.56100 5.27	687 E11.5_MANP_CHIP_HAND2_REP1_REP2_pooled_q0.01_peak_371
c	hr1 19888732 19889194 463 19889004 36.00 30.06681 10.87310 27	.41436 E11.5_MANP_CHIP_HAND2_REP1_REP2_pooled_q0.01_peak_372
c	hr1 19951816 19952059 244 19951950 17.00 10.96977 5.86415 8.7	3922 E11.5_MANP_CHIP_HAND2_REP1_REP2_pooled_q0.01_peak_373
c	hr1 19979300 19979562 263 19979426 21.00 14.95972 7.16729 12.	60612 E11.5_MANP_CHIP_HAND2_REP1_REP2_pooled_q0.01_peak_374
c	hr1 19983143 19984086 944 19983298 14.00 8.21768 4.88679 6.09	597 E11.5_MANP_CHIP_HAND2_REP1_REP2_pooled_q0.01_peak_375a
c	hr1 19983143 19984086 944 19983730 44.00 32.55064 9.77339 29.	86091 E11.5_MANP_CHIP_HAND2_REP1_REP2_pooled_q0.01_peak_375b
c	hr1 20131972 20132311 340 20132171 14.00 8.21768 4.88679 6.09	597 E11.5_MANP_CHIP_HAND2_REP1_REP2_pooled_q0.01_peak_376
c	hr1 20135082 20135808 727 20135432 77.00 81.33669 20.50811 78	.16116 E11.5_MANP_CHIP_HAND2_REP1_REP2_pooled_q0.01_peak_377
c	hr1 20247929 20248681 753 20248315 136.00 174.57632 36.02065	170.79933 E11.5_MANP_CHIP_HAND2_REP1_REP2_pooled_q0.01_peak_378
c	hr1 20268724 20268912 189 20268799 14.00 8.08274 4.80869 5.99	617 E11.5_MANP_CHIP_HAND2_REP1_REP2_pooled_q0.01_peak_379
c	hr1 20464240 20464485 246 20464363 19.00 12.92276 6.51572 10.	62788 E11.5_MANP_CHIP_HAND2_REP1_REP2_pooled_q0.01_peak_380
c	hr1 20466058 20466865 808 20466587 185.00 285.02753 60.59617	280.60599 E11.5_MANP_CHIP_HAND2_REP1_REP2_pooled_q0.01_peak_381
c	hr1 20508452 20508760 309 20508621 17.00 10.96977 5.86415 8.7	3922 E11.5_MANP_CHIP_HAND2_REP1_REP2_pooled_q0.01_peak_382
c	hr1 20569978 20570272 295 20570119 23.00 14.21446 6.31019 11.	88655 E11.5_MANP_CHIP_HAND2_REP1_REP2_pooled_q0.01_peak_383
c	hr1 20603531 20603820 290 20603683 28.00 22.65424 9.44779 20.	12667 E11.5_MANP_CHIP_HAND2_REP1_REP2_pooled_q0.01_peak_384
c	hr1 20734840 20735300 461 20735068 48.00 48.18712 15.96351 45	.30497 E11.5_MANP_CHIP_HAND2_REP1_REP2_pooled_q0.01_peak_385
c	hr1 20790590 20790778 189 20790751 14.00 8.21768 4.88679 6.09	597 E11.5_MANP_CHIP_HAND2_REP1_REP2_pooled_q0.01_peak_386
c	hr1 20791532 20791742 211 20791685 11.00 5.71447 3.90943 3.73	470 E11.5_MANP_CHIP_HAND2_REP1_REP2_pooled_q0.01_peak_387
c	hr1 20801632 20802005 374 20801828 60.00 54.22784 14.51049 51	.28695 E11.5_MANP_CHIP_HAND2_REP1_REP2_pooled_q0.01_peak_388
c	hr1 20848578 20848958 381 20848671 10.00 4.94456 3.58364 3.01	655 E11.5_MANP_CHIP_HAND2_REP1_REP2_pooled_q0.01_peak_389
c	hr1 20890439 20890793 355 20890558 18.00 11.93525 6.18993 9.6	7149 E11.5_MANP_CHIP_HAND2_REP1_REP2_pooled_q0.01_peak_390
c	hr1 20921870 20922182 313 20922042 26.00 20.37413 8.79622 17.	89234 E11.5_MANP_CHIP_HAND2_REP1_REP2_pooled_q0.01_peak_391
c	hr1 20933628 20933816 189 20933720 16.00 10.02746 5.53836 7.8	3127 E11.5_MANP_CHIP_HAND2_REP1_REP2_pooled_q0.01_peak_392
c	hr1 20951454 20951893 440 20951595 15.00 7.29785 4.20679 5.25	202 E11.5_MANP_CHIP_HAND2_REP1_REP2_pooled_q0.01_peak_393
c	hr1 20986763 20986974 212 20986847 13.00 6.57881 4.11415 4.54	160 E11.5_MANP_CHIP_HAND2_REP1_REP2_pooled_q0.01_peak_394
c	hr1 21010522 21010889 368 21010715 38.00 34.86656 12.70565 32	.14407 E11.5_MANP_CHIP_HAND2_REP1_REP2_pooled_q0.01_peak_395
c	hr1 21011540 21011887 348 21011762 13.00 7.35325 4.56100 5.27	687 E11.5_MANP_CHIP_HAND2_REP1_REP2_pooled_q0.01_peak_396
c	hr1 21041038 21041314 277 21041190 16.00 10.02746 5.53836 7.8	3127 E11.5_MANP_CHIP_HAND2_REP1_REP2_pooled_q0.01_peak_397
c	hr1 21077254 21077479 226 21077427 12.00 4.50144 3.09240 2.61	757 E11.5_MANP_CHIP_HAND2_REP1_REP2_pooled_q0.01_peak_398
c	hr1 21079106 21079637 532 21079315 18.00 11.93525 6.18993 9.6	7149 E11.5_MANP_CHIP_HAND2_REP1_REP2_pooled_q0.01_peak_399
c	hr1 21101618 21102073 456 21101914 47.00 46.81241 15.63772 43	.94462 E11.5_MANP_CHIP_HAND2_REP1_REP2_pooled_q0.01_peak_400
c	hr1 21154320 21155446 1127 21154658 62.00 68.28219 20.52451 6	5.21142 E11.5_MANP_CHIP_HAND2_REP1_REP2_pooled_q0.01_peak_401a
c	hr1 21154320 21155446 1127 21155295 19.00 11.76255 5.87735 9.	52147 E11.5_MANP_CHIP_HAND2_REP1_REP2_pooled_q0.01_peak_401b
c	hr1 21165000 21165197 198 21165090 11.00 5.71447 3.90943 3.73	470 E11.5_MANP_CHIP_HAND2_REP1_REP2_pooled_q0.01_peak_402
c	hr1 21166233 21166458 226 21166338 15.00 9.10962 5.21257 6.94	957 E11.5_MANP_CHIP_HAND2_REP1_REP2_pooled_q0.01_peak_403
c	hr1 21166645 21166898 254 21166768 19.00 12.92276 6.51572 10.	62788 E11.5_MANP_CHIP_HAND2_REP1_REP2_pooled_q0.01_peak_404
c	hr1 21232174 21232696 523 21232538 35.00 31.07319 11.72829 28	.40628 E11.5_MANP_CHIP_HAND2_REP1_REP2_pooled_q0.01_peak_405
c	hr1 21239006 21239299 294 21239129 21.00 13.67050 6.46509 11.	36690 E11.5_MANP_CHIP_HAND2_REP1_REP2_pooled_q0.01_peak_406
c	hr1 21251143 21251331 189 21251235 11.00 5.71447 3.90943 3.73	470 E11.5_MANP_CHIP_HAND2_REP1_REP2_pooled_q0.01_peak_407
c	hr1 21252515 21252812 298 21252664 15.00 9.10962 5.21257 6.94	957 E11.5_MANP_CHIP_HAND2_REP1_REP2_pooled_q0.01_peak_408
c	hr1 21451553 21451741 189 21451642 11.00 5.71447 3.90943 3.73	470 E11.5_MANP_CHIP_HAND2_REP1_REP2_pooled_q0.01_peak_409
c	hr1 21453049 21453446 398 21453269 50.00 50.96264 16.61508 48	.05222 E11.5_MANP_CHIP_HAND2_REP1_REP2_pooled_q0.01_peak_410
c	hr1 21481933 21482170 238 21482052 15.00 9.10962 5.21257 6.94	957 E11.5_MANP_CHIP_HAND2_REP1_REP2_pooled_q0.01_peak_411
c	hr1 21486669 21486967 299 21486807 28.00 22.65424 9.44779 20.	12667 E11.5_MANP_CHIP_HAND2_REP1_REP2_pooled_q0.01_peak_412
c	hr1 21505741 21506316 576 21506174 26.00 20.37413 8.79622 17.	89234 E11.5_MANP_CHIP_HAND2_REP1_REP2_pooled_q0.01_peak_413
c	hr1 21521472 21522253 782 21521707 23.00 17.07331 7.81886 14.	66632 E11.5_MANP_CHIP_HAND2_REP1_REP2_pooled_q0.01_peak_414a
c	hr1 21521472 21522253 782 21522063 21.00 14.95972 7.16729 12.	60612 E11.5_MANP_CHIP_HAND2_REP1_REP2_pooled_q0.01_peak_414b
c	hr1 21550364 21550836 473 21550665 23.00 17.07331 7.81886 14.	66632 E11.5_MANP_CHIP_HAND2_REP1_REP2_pooled_q0.01_peak_415
c	hr1 21611017 21611520 504 21611285 58.00 62.38948 19.22136 59	.36964 E11.5_MANP_CHIP_HAND2_REP1_REP2_pooled_q0.01_peak_416
c	hr1 21712728 21713241 514 21712959 104.00 135.75829 34.20752	132.20880 E11.5_MANP_CHIP_HAND2_REP1_REP2_pooled_q0.01_peak_417
c	hr1 21753175 21753363 189 21753286 16.00 10.02746 5.53836 7.8	3127 E11.5_MANP_CHIP_HAND2_REP1_REP2_pooled_q0.01_peak_418
c	hr1 21883771 21884222 452 21884004 87.00 96.07595 23.13735 92	.78733 E11.5_MANP_CHIP_HAND2_REP1_REP2_pooled_q0.01_peak_419
c	hr1 21919408 21919760 353 21919595 24.00 18.15687 8.14465 15.	72300 E11.5_MANP_CHIP_HAND2_REP1_REP2_pooled_q0.01_peak_420
c	hr1 21960429 21960976 548 21960593 56.00 49.15114 13.55898 46	.26289 E11.5_MANP_CHIP_HAND2_REP1_REP2_pooled_q0.01_peak_421
c	hr1 21961182 21961451 270 21961332 13.00 6.57881 4.11415 4.54	160 E11.5_MANP_CHIP_HAND2_REP1_REP2_pooled_q0.01_peak_422
c	hr1 21963607 21963978 372 21963800 49.00 49.07493 16.02898 46	.18911 E11.5_MANP_CHIP_HAND2_REP1_REP2_pooled_q0.01_peak_423
c	hr1 22118464 22118702 239 22118572 13.00 7.35325 4.56100 5.27	687 E11.5_MANP_CHIP_HAND2_REP1_REP2_pooled_q0.01_peak_424
c	hr1 22248705 22248988 284 22248832 25.00 19.25736 8.47043 16.	79900 E11.5_MANP_CHIP_HAND2_REP1_REP2_pooled_q0.01_peak_425
c	hr1 22262014 22262487 474 22262240 42.00 40.07680 14.00879 37	.28658 E11.5_MANP_CHIP_HAND2_REP1_REP2_pooled_q0.01_peak_426
c	hr1 22268697 22268916 220 22268810 15.00 8.20688 4.70188 6.09	597 E11.5_MANP_CHIP_HAND2_REP1_REP2_pooled_q0.01_peak_427
c	hr1 22320918 22321259 342 22321162 10.00 4.94456 3.58364 3.01	655 E11.5_MANP_CHIP_HAND2_REP1_REP2_pooled_q0.01_peak_428
c	hr1 22346503 22346767 265 22346652 17.00 9.93841 5.28962 7.76	693 E11.5_MANP_CHIP_HAND2_REP1_REP2_pooled_q0.01_peak_429
c	hr1 22411511 22411784 274 22411634 19.00 12.92276 6.51572 10.	62788 E11.5_MANP_CHIP_HAND2_REP1_REP2_pooled_q0.01_peak_430
c	hr1 22425562 22425823 262 22425686 23.00 15.65495 7.05282 13.	29422 E11.5_MANP_CHIP_HAND2_REP1_REP2_pooled_q0.01_peak_431
c	hr1 22533515 22533730 216 22533625 12.00 6.51816 4.23522 4.49	107 E11.5_MANP_CHIP_HAND2_REP1_REP2_pooled_q0.01_peak_432
c	hr1 22533865 22534085 221 22533986 15.00 9.10962 5.21257 6.94	957 E11.5_MANP_CHIP_HAND2_REP1_REP2_pooled_q0.01_peak_433
c	hr1 22686583 22686800 218 22686690 15.00 9.10962 5.21257 6.94	957 E11.5_MANP_CHIP_HAND2_REP1_REP2_pooled_q0.01_peak_434
c	hr1 22762830 22763122 293 22762984 13.00 7.35325 4.56100 5.27	687 E11.5_MANP_CHIP_HAND2_REP1_REP2_pooled_q0.01_peak_435
c	hr1 22824680 22824893 214 22824792 12.00 6.51816 4.23522 4.49	107 E11.5_MANP_CHIP_HAND2_REP1_REP2_pooled_q0.01_peak_436
c	hr1 22890601 22891171 571 22890922 123.00 168.90204 40.39745	165.15868 E11.5_MANP_CHIP_HAND2_REP1_REP2_pooled_q0.01_peak_437
c	hr1 23061928 23062313 386 23062090 20.00 13.93124 6.84150 11.	60594 E11.5_MANP_CHIP_HAND2_REP1_REP2_pooled_q0.01_peak_438
c	hr1 23120501 23120818 318 23120665 31.00 26.18317 10.42515 23	.59259 E11.5_MANP_CHIP_HAND2_REP1_REP2_pooled_q0.01_peak_439
c	hr1 23145403 23145636 234 23145508 15.00 9.10962 5.21257 6.94	957 E11.5_MANP_CHIP_HAND2_REP1_REP2_pooled_q0.01_peak_440
c	hr1 23146114 23146974 861 23146632 139.00 197.80022 45.61002	193.88951 E11.5_MANP_CHIP_HAND2_REP1_REP2_pooled_q0.01_peak_441
c	hr1 23174695 23175061 367 23174922 23.00 17.07331 7.81886 14.	66632 E11.5_MANP_CHIP_HAND2_REP1_REP2_pooled_q0.01_peak_442
c	hr1 23255953 23256158 206 23256051 19.00 12.92276 6.51572 10.	62788 E11.5_MANP_CHIP_HAND2_REP1_REP2_pooled_q0.01_peak_443
c	hr1 23256268 23256547 280 23256384 15.00 9.10962 5.21257 6.94	957 E11.5_MANP_CHIP_HAND2_REP1_REP2_pooled_q0.01_peak_444
c	hr1 23284684 23285197 514 23284982 42.00 40.07680 14.00879 37	.28658 E11.5_MANP_CHIP_HAND2_REP1_REP2_pooled_q0.01_peak_445
c	hr1 23291611 23291901 291 23291755 15.00 8.96444 5.12927 6.83	507 E11.5_MANP_CHIP_HAND2_REP1_REP2_pooled_q0.01_peak_446
c	hr1 23330082 23330276 195 23330180 14.00 8.21768 4.88679 6.09	597 E11.5_MANP_CHIP_HAND2_REP1_REP2_pooled_q0.01_peak_447
c	hr1 23383034 23383554 521 23383236 11.00 5.61015 3.84695 3.66	624 E11.5_MANP_CHIP_HAND2_REP1_REP2_pooled_q0.01_peak_448a
c	hr1 23383034 23383554 521 23383447 16.00 10.02746 5.53836 7.8	3127 E11.5_MANP_CHIP_HAND2_REP1_REP2_pooled_q0.01_peak_448b
c	hr1 23588362 23588555 194 23588445 16.00 10.02746 5.53836 7.8	3127 E11.5_MANP_CHIP_HAND2_REP1_REP2_pooled_q0.01_peak_449
c	hr1 23656089 23656603 515 23656380 50.00 50.96264 16.61508 48	.05222 E11.5_MANP_CHIP_HAND2_REP1_REP2_pooled_q0.01_peak_450
c	hr1 23762198 23762420 223 23762308 11.00 5.71447 3.90943 3.73	470 E11.5_MANP_CHIP_HAND2_REP1_REP2_pooled_q0.01_peak_451
c	hr1 23892061 23892395 335 23892237 22.00 16.00735 7.49307 13.	62655 E11.5_MANP_CHIP_HAND2_REP1_REP2_pooled_q0.01_peak_452
c	hr1 23966152 23966789 638 23966445 52.00 44.19514 12.60747 41	.35699 E11.5_MANP_CHIP_HAND2_REP1_REP2_pooled_q0.01_peak_453
c	hr1 24005337 24006001 665 24005709 199.00 275.14667 47.57537	270.78726 E11.5_MANP_CHIP_HAND2_REP1_REP2_pooled_q0.01_peak_454
c	hr1 24051708 24052086 379 24051922 27.00 21.50661 9.12200 19.	00221 E11.5_MANP_CHIP_HAND2_REP1_REP2_pooled_q0.01_peak_455
c	hr1 24100010 24100425 416 24100099 12.00 5.80770 3.82028 3.81	936 E11.5_MANP_CHIP_HAND2_REP1_REP2_pooled_q0.01_peak_456a
c	hr1 24100010 24100425 416 24100316 13.00 7.35325 4.56100 5.27	687 E11.5_MANP_CHIP_HAND2_REP1_REP2_pooled_q0.01_peak_456b
c	hr1 24103973 24104291 319 24104136 30.00 19.58492 7.37418 17.	12495 E11.5_MANP_CHIP_HAND2_REP1_REP2_pooled_q0.01_peak_457
c	hr1 24134783 24135100 318 24134947 12.00 4.50144 3.09240 2.61	757 E11.5_MANP_CHIP_HAND2_REP1_REP2_pooled_q0.01_peak_458
c	hr1 24175727 24176188 462 24175897 23.00 17.07331 7.81886 14.	66632 E11.5_MANP_CHIP_HAND2_REP1_REP2_pooled_q0.01_peak_459
c	hr1 24194904 24195580 677 24195226 59.00 60.10223 17.63206 57	.10549 E11.5_MANP_CHIP_HAND2_REP1_REP2_pooled_q0.01_peak_460
c	hr1 24195742 24196734 993 24196273 203.00 272.08771 44.30605	267.74530 E11.5_MANP_CHIP_HAND2_REP1_REP2_pooled_q0.01_peak_461
c	hr1 24224029 24224354 326 24224183 24.00 18.15687 8.14465 15.	72300 E11.5_MANP_CHIP_HAND2_REP1_REP2_pooled_q0.01_peak_462
c	hr1 24226222 24226537 316 24226387 25.00 19.25736 8.47043 16.	79900 E11.5_MANP_CHIP_HAND2_REP1_REP2_pooled_q0.01_peak_463
c	hr1 24229711 24230022 312 24229804 15.00 9.10962 5.21257 6.94	957 E11.5_MANP_CHIP_HAND2_REP1_REP2_pooled_q0.01_peak_464
c	hr1 24230805 24231050 246 24230936 21.00 14.95972 7.16729 12.	60612 E11.5_MANP_CHIP_HAND2_REP1_REP2_pooled_q0.01_peak_465
c	hr1 24239722 24240345 624 24240040 78.00 92.88564 25.73708 89	.62032 E11.5_MANP_CHIP_HAND2_REP1_REP2_pooled_q0.01_peak_466
c	hr1 24262975 24263266 292 24263126 22.00 16.00735 7.49307 13.	62655 E11.5_MANP_CHIP_HAND2_REP1_REP2_pooled_q0.01_peak_467
c	hr1 24264524 24264894 371 24264706 26.00 20.37413 8.79622 17.	89234 E11.5_MANP_CHIP_HAND2_REP1_REP2_pooled_q0.01_peak_468
c	hr1 24286397 24286735 339 24286559 37.00 33.59076 12.37986 30	.88588 E11.5_MANP_CHIP_HAND2_REP1_REP2_pooled_q0.01_peak_469
c	hr1 24302736 24303008 273 24302895 26.00 20.37413 8.79622 17.	89234 E11.5_MANP_CHIP_HAND2_REP1_REP2_pooled_q0.01_peak_470
c	hr1 24304751 24304969 219 24304855 17.00 10.96977 5.86415 8.7	3922 E11.5_MANP_CHIP_HAND2_REP1_REP2_pooled_q0.01_peak_471
c	hr1 24317252 24317549 298 24317394 20.00 13.93124 6.84150 11.	60594 E11.5_MANP_CHIP_HAND2_REP1_REP2_pooled_q0.01_peak_472
c	hr1 24401750 24402164 415 24401965 51.00 52.36312 16.94086 49	.43733 E11.5_MANP_CHIP_HAND2_REP1_REP2_pooled_q0.01_peak_473
c	hr1 24410223 24410522 300 24410331 12.00 6.51816 4.23522 4.49	107 E11.5_MANP_CHIP_HAND2_REP1_REP2_pooled_q0.01_peak_474
c	hr1 24467123 24467326 204 24467218 13.00 7.35325 4.56100 5.27	687 E11.5_MANP_CHIP_HAND2_REP1_REP2_pooled_q0.01_peak_475
c	hr1 24511570 24511776 207 24511662 18.00 10.83949 5.58349 8.6	3233 E11.5_MANP_CHIP_HAND2_REP1_REP2_pooled_q0.01_peak_476
c	hr1 24549795 24550594 800 24550187 53.00 55.18870 17.59244 52	.23545 E11.5_MANP_CHIP_HAND2_REP1_REP2_pooled_q0.01_peak_477
c	hr1 24568654 24568884 231 24568781 19.00 12.92276 6.51572 10.	62788 E11.5_MANP_CHIP_HAND2_REP1_REP2_pooled_q0.01_peak_478
c	hr1 24572517 24572853 337 24572662 14.00 7.37914 4.40802 5.29	814 E11.5_MANP_CHIP_HAND2_REP1_REP2_pooled_q0.01_peak_479
c	hr1 24678347 24678695 349 24678513 14.00 8.21768 4.88679 6.09	597 E11.5_MANP_CHIP_HAND2_REP1_REP2_pooled_q0.01_peak_480
c	hr1 24678775 24679029 255 24678936 15.00 9.10962 5.21257 6.94	957 E11.5_MANP_CHIP_HAND2_REP1_REP2_pooled_q0.01_peak_481
c	hr1 24704453 24704845 393 24704614 21.00 14.95972 7.16729 12.	60612 E11.5_MANP_CHIP_HAND2_REP1_REP2_pooled_q0.01_peak_482
c	hr1 24734865 24735445 581 24735036 34.00 29.83204 11.40250 27	.18352 E11.5_MANP_CHIP_HAND2_REP1_REP2_pooled_q0.01_peak_483
c	hr1 24741646 24741936 291 24741791 19.00 12.92276 6.51572 10.	62788 E11.5_MANP_CHIP_HAND2_REP1_REP2_pooled_q0.01_peak_484
c	hr1 24754660 24754910 251 24754786 23.00 17.07331 7.81886 14.	66632 E11.5_MANP_CHIP_HAND2_REP1_REP2_pooled_q0.01_peak_485
c	hr1 24953856 24954144 289 24953993 25.00 17.70976 7.64056 15.	29538 E11.5_MANP_CHIP_HAND2_REP1_REP2_pooled_q0.01_peak_486
c	hr1 25057141 25057593 453 25057347 37.00 33.59076 12.37986 30	.88588 E11.5_MANP_CHIP_HAND2_REP1_REP2_pooled_q0.01_peak_487
c	hr1 25094909 25095293 385 25095102 28.00 20.91265 8.52216 18.	42583 E11.5_MANP_CHIP_HAND2_REP1_REP2_pooled_q0.01_peak_488
c	hr1 25166415 25166712 298 25166555 34.00 26.32269 9.59117 23.	73196 E11.5_MANP_CHIP_HAND2_REP1_REP2_pooled_q0.01_peak_489
c	hr1 25178773 25179213 441 25179093 15.00 9.10962 5.21257 6.94	957 E11.5_MANP_CHIP_HAND2_REP1_REP2_pooled_q0.01_peak_490
c	hr1 25189122 25189656 535 25189435 56.00 58.08205 17.84014 55	.10201 E11.5_MANP_CHIP_HAND2_REP1_REP2_pooled_q0.01_peak_491
c	hr1 25228637 25228953 317 25228797 21.00 13.67050 6.46509 11.	36690 E11.5_MANP_CHIP_HAND2_REP1_REP2_pooled_q0.01_peak_492
c	hr1 25815096 25815466 371 25815283 18.00 11.93525 6.18993 9.6	7149 E11.5_MANP_CHIP_HAND2_REP1_REP2_pooled_q0.01_peak_493
c	hr1 25830458 25830837 380 25830631 46.00 42.53944 13.81178 39	.72720 E11.5_MANP_CHIP_HAND2_REP1_REP2_pooled_q0.01_peak_494
c	hr1 25836045 25836239 195 25836146 14.00 8.21768 4.88679 6.09	597 E11.5_MANP_CHIP_HAND2_REP1_REP2_pooled_q0.01_peak_495
c	hr1 26611548 26611736 189 26611644 11.00 5.71447 3.90943 3.73	470 E11.5_MANP_CHIP_HAND2_REP1_REP2_pooled_q0.01_peak_496
c	hr1 26764895 26765634 740 26765303 150.00 175.67339 30.17092	171.89282 E11.5_MANP_CHIP_HAND2_REP1_REP2_pooled_q0.01_peak_497
c	hr1 27105018 27105434 417 27105242 57.00 60.93423 18.89558 57	.92719 E11.5_MANP_CHIP_HAND2_REP1_REP2_pooled_q0.01_peak_498
c	hr1 27566443 27566660 218 27566557 19.00 9.59281 4.75754 7.42	940 E11.5_MANP_CHIP_HAND2_REP1_REP2_pooled_q0.01_peak_499
c	hr1 27819185 27819386 202 27819286 16.00 9.06044 4.99575 6.92	684 E11.5_MANP_CHIP_HAND2_REP1_REP2_pooled_q0.01_peak_500
c	hr1 28025636 28026078 443 28025850 40.00 32.35705 10.77990 29	.67072 E11.5_MANP_CHIP_HAND2_REP1_REP2_pooled_q0.01_peak_501
c	hr1 28214276 28214873 598 28214496 47.00 43.84041 14.10565 41	.01270 E11.5_MANP_CHIP_HAND2_REP1_REP2_pooled_q0.01_peak_502
c	hr1 28338630 28338919 290 28338768 20.00 13.93124 6.84150 11.	60594 E11.5_MANP_CHIP_HAND2_REP1_REP2_pooled_q0.01_peak_503
c	hr1 28348633 28348935 303 28348781 33.00 28.60308 11.07672 25	.97338 E11.5_MANP_CHIP_HAND2_REP1_REP2_pooled_q0.01_peak_504
c	hr1 28415572 28416039 468 28415855 38.00 32.47765 11.46084 29	.78833 E11.5_MANP_CHIP_HAND2_REP1_REP2_pooled_q0.01_peak_505
c	hr1 28420001 28420939 939 28420191 54.00 56.61350 17.91822 53	.64691 E11.5_MANP_CHIP_HAND2_REP1_REP2_pooled_q0.01_peak_506a
c	hr1 28420001 28420939 939 28420643 119.00 161.81279 39.09430	158.11028 E11.5_MANP_CHIP_HAND2_REP1_REP2_pooled_q0.01_peak_506b
c	hr1 28430992 28431314 323 28431138 28.00 22.65424 9.44779 20.	12667 E11.5_MANP_CHIP_HAND2_REP1_REP2_pooled_q0.01_peak_507
c	hr1 28434037 28434266 230 28434153 15.00 8.20688 4.70188 6.09	597 E11.5_MANP_CHIP_HAND2_REP1_REP2_pooled_q0.01_peak_508
c	hr1 28465430 28465618 189 28465536 12.00 6.51816 4.23522 4.49	107 E11.5_MANP_CHIP_HAND2_REP1_REP2_pooled_q0.01_peak_509
c	hr1 28790306 28790560 255 28790429 17.00 10.96977 5.86415 8.7	3922 E11.5_MANP_CHIP_HAND2_REP1_REP2_pooled_q0.01_peak_510
c	hr1 28896170 28896463 294 28896329 24.00 18.15687 8.14465 15.	72300 E11.5_MANP_CHIP_HAND2_REP1_REP2_pooled_q0.01_peak_511
c	hr1 28991143 28991469 327 28991332 27.00 19.82969 8.22830 17.	36616 E11.5_MANP_CHIP_HAND2_REP1_REP2_pooled_q0.01_peak_512
c	hr1 29052845 29053151 307 29052983 27.00 21.50661 9.12200 19.	00221 E11.5_MANP_CHIP_HAND2_REP1_REP2_pooled_q0.01_peak_513
c	hr1 29172086 29172330 245 29172212 20.00 13.93124 6.84150 11.	60594 E11.5_MANP_CHIP_HAND2_REP1_REP2_pooled_q0.01_peak_514
c	hr1 29273263 29273591 329 29273430 31.00 26.18317 10.42515 23	.59259 E11.5_MANP_CHIP_HAND2_REP1_REP2_pooled_q0.01_peak_515
c	hr1 29343563 29343770 208 29343654 12.00 5.80770 3.82028 3.81	936 E11.5_MANP_CHIP_HAND2_REP1_REP2_pooled_q0.01_peak_516
c	hr1 29405869 29406168 300 29406012 24.00 18.15687 8.14465 15.	72300 E11.5_MANP_CHIP_HAND2_REP1_REP2_pooled_q0.01_peak_517
c	hr1 29944833 29945038 206 29944963 14.00 5.22062 3.25780 3.28	042 E11.5_MANP_CHIP_HAND2_REP1_REP2_pooled_q0.01_peak_518
c	hr1 30519437 30519700 264 30519567 23.00 17.07331 7.81886 14.	66632 E11.5_MANP_CHIP_HAND2_REP1_REP2_pooled_q0.01_peak_519
c	hr1 30521283 30521487 205 30521373 15.00 9.10962 5.21257 6.94	957 E11.5_MANP_CHIP_HAND2_REP1_REP2_pooled_q0.01_peak_520
c	hr1 30533456 30533709 254 30533563 16.00 8.08520 4.46972 5.99	627 E11.5_MANP_CHIP_HAND2_REP1_REP2_pooled_q0.01_peak_521
c	hr1 30535992 30536858 867 30536219 26.00 20.37413 8.79622 17.	89234 E11.5_MANP_CHIP_HAND2_REP1_REP2_pooled_q0.01_peak_522a
c	hr1 30535992 30536858 867 30536482 43.00 38.69205 12.93018 35	.92744 E11.5_MANP_CHIP_HAND2_REP1_REP2_pooled_q0.01_peak_522b
c	hr1 30536965 30538045 1081 30537521 49.00 49.57059 16.28929 4	6.67432 E11.5_MANP_CHIP_HAND2_REP1_REP2_pooled_q0.01_peak_523
c	hr1 30541643 30542248 606 30541819 35.00 31.07319 11.72829 28	.40628 E11.5_MANP_CHIP_HAND2_REP1_REP2_pooled_q0.01_peak_524
c	hr1 30555543 30555931 389 30555742 38.00 34.86656 12.70565 32	.14407 E11.5_MANP_CHIP_HAND2_REP1_REP2_pooled_q0.01_peak_525
c	hr1 30636362 30636777 416 30636614 28.00 22.65424 9.44779 20.	12667 E11.5_MANP_CHIP_HAND2_REP1_REP2_pooled_q0.01_peak_526
c	hr1 30681787 30682183 397 30681926 12.00 5.80770 3.82028 3.81	936 E11.5_MANP_CHIP_HAND2_REP1_REP2_pooled_q0.01_peak_527
c	hr1 30715040 30715388 349 30715199 23.00 17.07331 7.81886 14.	66632 E11.5_MANP_CHIP_HAND2_REP1_REP2_pooled_q0.01_peak_528
c	hr1 30798892 30799080 189 30799030 12.00 6.51816 4.23522 4.49	107 E11.5_MANP_CHIP_HAND2_REP1_REP2_pooled_q0.01_peak_529
c	hr1 30805953 30806208 256 30806076 20.00 13.73472 6.73217 11.	43044 E11.5_MANP_CHIP_HAND2_REP1_REP2_pooled_q0.01_peak_530
c	hr1 30823084 30823353 270 30823205 21.00 13.67050 6.46509 11.	36690 E11.5_MANP_CHIP_HAND2_REP1_REP2_pooled_q0.01_peak_531
c	hr1 30824092 30824411 320 30824255 27.00 21.50661 9.12200 19.	00221 E11.5_MANP_CHIP_HAND2_REP1_REP2_pooled_q0.01_peak_532
c	hr1 30873543 30874164 622 30873995 40.00 34.93233 12.04857 32	.20782 E11.5_MANP_CHIP_HAND2_REP1_REP2_pooled_q0.01_peak_533
c	hr1 30949514 30950562 1049 30949844 26.00 20.37413 8.79622 17	.89234 E11.5_MANP_CHIP_HAND2_REP1_REP2_pooled_q0.01_peak_534a
c	hr1 30949514 30950562 1049 30950389 21.00 14.95972 7.16729 12	.60612 E11.5_MANP_CHIP_HAND2_REP1_REP2_pooled_q0.01_peak_534b
c	hr1 30951085 30951275 191 30951161 12.00 5.80770 3.82028 3.81	936 E11.5_MANP_CHIP_HAND2_REP1_REP2_pooled_q0.01_peak_535
c	hr1 31042914 31043239 326 31043093 43.00 41.40486 14.33458 38	.59886 E11.5_MANP_CHIP_HAND2_REP1_REP2_pooled_q0.01_peak_536
c	hr1 31058865 31059067 203 31058957 14.00 8.21768 4.88679 6.09	597 E11.5_MANP_CHIP_HAND2_REP1_REP2_pooled_q0.01_peak_537
c	hr1 31072669 31073423 755 31073082 131.00 152.10095 28.66862	148.45676 E11.5_MANP_CHIP_HAND2_REP1_REP2_pooled_q0.01_peak_538
c	hr1 31084260 31084549 290 31084382 14.00 8.21768 4.88679 6.09	597 E11.5_MANP_CHIP_HAND2_REP1_REP2_pooled_q0.01_peak_539
c	hr1 31095781 31096734 954 31095976 29.00 23.81653 9.77358 21.	26746 E11.5_MANP_CHIP_HAND2_REP1_REP2_pooled_q0.01_peak_540a
c	hr1 31095781 31096734 954 31096218 41.00 38.75870 13.68301 35	.98432 E11.5_MANP_CHIP_HAND2_REP1_REP2_pooled_q0.01_peak_540b
c	hr1 31095781 31096734 954 31096533 46.00 45.44663 15.31194 42	.59351 E11.5_MANP_CHIP_HAND2_REP1_REP2_pooled_q0.01_peak_540c
c	hr1 31149626 31149907 282 31149754 10.00 4.33099 3.21439 2.45	891 E11.5_MANP_CHIP_HAND2_REP1_REP2_pooled_q0.01_peak_541
c	hr1 31153155 31153566 412 31153361 31.00 26.18317 10.42515 23	.59259 E11.5_MANP_CHIP_HAND2_REP1_REP2_pooled_q0.01_peak_542
c	hr1 31226246 31226613 368 31226431 39.00 36.15333 13.03143 33	.41379 E11.5_MANP_CHIP_HAND2_REP1_REP2_pooled_q0.01_peak_543
c	hr1 31808202 31808531 330 31808378 21.00 14.95972 7.16729 12.	60612 E11.5_MANP_CHIP_HAND2_REP1_REP2_pooled_q0.01_peak_544
c	hr1 32172450 32172907 458 32172540 11.00 5.45721 3.75582 3.51	478 E11.5_MANP_CHIP_HAND2_REP1_REP2_pooled_q0.01_peak_545a
c	hr1 32172450 32172907 458 32172751 26.00 20.37413 8.79622 17.	89234 E11.5_MANP_CHIP_HAND2_REP1_REP2_pooled_q0.01_peak_545b
c	hr1 32229009 32229518 510 32229316 44.00 42.74266 14.66036 39	.92121 E11.5_MANP_CHIP_HAND2_REP1_REP2_pooled_q0.01_peak_546
c	hr1 32239961 32240459 499 32240220 97.00 123.90913 31.92701 1	20.43442 E11.5_MANP_CHIP_HAND2_REP1_REP2_pooled_q0.01_peak_547
c	hr1 32283137 32283798 662 32283558 93.00 117.23421 30.62387 1	13.80353 E11.5_MANP_CHIP_HAND2_REP1_REP2_pooled_q0.01_peak_548
c	hr1 32360406 32360705 300 32360553 23.00 14.21446 6.31019 11.	88655 E11.5_MANP_CHIP_HAND2_REP1_REP2_pooled_q0.01_peak_549
c	hr1 32363380 32364037 658 32363712 29.00 23.81653 9.77358 21.	26746 E11.5_MANP_CHIP_HAND2_REP1_REP2_pooled_q0.01_peak_550
c	hr1 32365104 32365439 336 32365281 25.00 16.13600 6.83604 13.	75317 E11.5_MANP_CHIP_HAND2_REP1_REP2_pooled_q0.01_peak_551
c	hr1 32428170 32428760 591 32428576 38.00 30.03602 10.25405 27	.38576 E11.5_MANP_CHIP_HAND2_REP1_REP2_pooled_q0.01_peak_552
c	hr1 32429531 32430094 564 32429774 113.00 151.28764 37.13959	147.64536 E11.5_MANP_CHIP_HAND2_REP1_REP2_pooled_q0.01_peak_553
c	hr1 32595301 32595533 233 32595406 14.00 8.21768 4.88679 6.09	597 E11.5_MANP_CHIP_HAND2_REP1_REP2_pooled_q0.01_peak_554
c	hr1 32789921 32790127 207 32790031 16.00 10.02746 5.53836 7.8	3127 E11.5_MANP_CHIP_HAND2_REP1_REP2_pooled_q0.01_peak_555
c	hr1 33127809 33128144 336 33127954 20.00 13.93124 6.84150 11.	60594 E11.5_MANP_CHIP_HAND2_REP1_REP2_pooled_q0.01_peak_556
c	hr1 33271732 33272067 336 33271867 13.00 7.35325 4.56100 5.27	687 E11.5_MANP_CHIP_HAND2_REP1_REP2_pooled_q0.01_peak_557
c	hr1 33365088 33365331 244 33365217 11.00 5.71447 3.90943 3.73	470 E11.5_MANP_CHIP_HAND2_REP1_REP2_pooled_q0.01_peak_558
c	hr1 33386167 33386488 322 33386334 29.00 23.81653 9.77358 21.	26746 E11.5_MANP_CHIP_HAND2_REP1_REP2_pooled_q0.01_peak_559
c	hr1 33459965 33460153 189 33460053 11.00 5.71447 3.90943 3.73	470 E11.5_MANP_CHIP_HAND2_REP1_REP2_pooled_q0.01_peak_560
c	hr1 33460268 33460644 377 33460474 33.00 28.60308 11.07672 25	.97338 E11.5_MANP_CHIP_HAND2_REP1_REP2_pooled_q0.01_peak_561
c	hr1 33464323 33464664 342 33464483 40.00 37.45079 13.35722 34	.69261 E11.5_MANP_CHIP_HAND2_REP1_REP2_pooled_q0.01_peak_562
c	hr1 33481587 33482021 435 33481746 32.00 27.38667 10.75093 24	.77647 E11.5_MANP_CHIP_HAND2_REP1_REP2_pooled_q0.01_peak_563
c	hr1 33533264 33533669 406 33533487 47.00 46.81241 15.63772 43	.94462 E11.5_MANP_CHIP_HAND2_REP1_REP2_pooled_q0.01_peak_564
c	hr1 33564007 33564431 425 33564226 34.00 25.52776 9.20236 22.	95247 E11.5_MANP_CHIP_HAND2_REP1_REP2_pooled_q0.01_peak_565
c	hr1 33595583 33596011 429 33595830 24.00 11.79322 4.99518 9.5	5191 E11.5_MANP_CHIP_HAND2_REP1_REP2_pooled_q0.01_peak_566
c	hr1 33632488 33632842 355 33632736 12.00 6.40366 4.16753 4.40	885 E11.5_MANP_CHIP_HAND2_REP1_REP2_pooled_q0.01_peak_567
c	hr1 33635862 33636117 256 33635997 26.00 20.37413 8.79622 17.	89234 E11.5_MANP_CHIP_HAND2_REP1_REP2_pooled_q0.01_peak_568
c	hr1 33686098 33686460 363 33686296 30.00 24.99298 10.09936 22	.42290 E11.5_MANP_CHIP_HAND2_REP1_REP2_pooled_q0.01_peak_569
c	hr1 33693919 33694263 345 33694072 38.00 34.86656 12.70565 32	.14407 E11.5_MANP_CHIP_HAND2_REP1_REP2_pooled_q0.01_peak_570
c	hr1 33719777 33720053 277 33719892 18.00 11.93525 6.18993 9.6	7149 E11.5_MANP_CHIP_HAND2_REP1_REP2_pooled_q0.01_peak_571
c	hr1 33763969 33764312 344 33764094 11.00 5.71447 3.90943 3.73	470 E11.5_MANP_CHIP_HAND2_REP1_REP2_pooled_q0.01_peak_572
c	hr1 33814017 33814506 490 33814340 12.00 6.51816 4.23522 4.49	107 E11.5_MANP_CHIP_HAND2_REP1_REP2_pooled_q0.01_peak_573
c	hr1 33854034 33854276 243 33854158 15.00 9.10962 5.21257 6.94	957 E11.5_MANP_CHIP_HAND2_REP1_REP2_pooled_q0.01_peak_574
c	hr1 33867350 33867613 264 33867497 22.00 16.00735 7.49307 13.	62655 E11.5_MANP_CHIP_HAND2_REP1_REP2_pooled_q0.01_peak_575
c	hr1 33871024 33871261 238 33871126 17.00 10.96977 5.86415 8.7	3922 E11.5_MANP_CHIP_HAND2_REP1_REP2_pooled_q0.01_peak_576
c	hr1 33883254 33883753 500 33883530 69.00 69.94071 18.40471 66	.85620 E11.5_MANP_CHIP_HAND2_REP1_REP2_pooled_q0.01_peak_577
c	hr1 33981979 33982316 338 33982147 40.00 37.45079 13.35722 34	.69261 E11.5_MANP_CHIP_HAND2_REP1_REP2_pooled_q0.01_peak_578
c	hr1 34011454 34011689 236 34011553 11.00 5.71447 3.90943 3.73	470 E11.5_MANP_CHIP_HAND2_REP1_REP2_pooled_q0.01_peak_579
c	hr1 34016135 34016339 205 34016242 15.00 9.10962 5.21257 6.94	957 E11.5_MANP_CHIP_HAND2_REP1_REP2_pooled_q0.01_peak_580
c	hr1 34018952 34019212 261 34019060 23.00 17.07331 7.81886 14.	66632 E11.5_MANP_CHIP_HAND2_REP1_REP2_pooled_q0.01_peak_581
c	hr1 34020008 34020870 863 34020348 53.00 48.38332 14.19792 45	.49926 E11.5_MANP_CHIP_HAND2_REP1_REP2_pooled_q0.01_peak_582a
c	hr1 34020008 34020870 863 34020727 38.00 34.86656 12.70565 32	.14407 E11.5_MANP_CHIP_HAND2_REP1_REP2_pooled_q0.01_peak_582b
c	hr1 34034278 34034706 429 34034464 25.00 19.25736 8.47043 16.	79900 E11.5_MANP_CHIP_HAND2_REP1_REP2_pooled_q0.01_peak_583
c	hr1 34052268 34052951 684 34052603 137.00 176.26859 36.28357	172.48141 E11.5_MANP_CHIP_HAND2_REP1_REP2_pooled_q0.01_peak_584
c	hr1 34060337 34060525 189 34060435 16.00 7.26194 4.04391 5.21	887 E11.5_MANP_CHIP_HAND2_REP1_REP2_pooled_q0.01_peak_585
c	hr1 34070526 34070792 267 34070672 26.00 20.37413 8.79622 17.	89234 E11.5_MANP_CHIP_HAND2_REP1_REP2_pooled_q0.01_peak_586
c	hr1 34096946 34097207 262 34097093 17.00 10.96977 5.86415 8.7	3922 E11.5_MANP_CHIP_HAND2_REP1_REP2_pooled_q0.01_peak_587
c	hr1 34117841 34118271 431 34118035 12.00 6.51816 4.23522 4.49	107 E11.5_MANP_CHIP_HAND2_REP1_REP2_pooled_q0.01_peak_588
c	hr1 34236109 34237077 969 34236425 39.00 36.15333 13.03143 33	.41379 E11.5_MANP_CHIP_HAND2_REP1_REP2_pooled_q0.01_peak_589a
c	hr1 34236109 34237077 969 34236917 51.00 45.82114 13.67207 42	.96609 E11.5_MANP_CHIP_HAND2_REP1_REP2_pooled_q0.01_peak_589b
c	hr1 34253894 34254484 591 34254230 69.00 74.45561 20.57074 71	.33218 E11.5_MANP_CHIP_HAND2_REP1_REP2_pooled_q0.01_peak_590
c	hr1 34256056 34256615 560 34256325 102.00 132.35161 33.55594	128.82414 E11.5_MANP_CHIP_HAND2_REP1_REP2_pooled_q0.01_peak_591
c	hr1 34291853 34292183 331 34291995 40.00 37.45079 13.35722 34	.69261 E11.5_MANP_CHIP_HAND2_REP1_REP2_pooled_q0.01_peak_592
c	hr1 34293258 34293488 231 34293376 17.00 10.96977 5.86415 8.7	3922 E11.5_MANP_CHIP_HAND2_REP1_REP2_pooled_q0.01_peak_593
c	hr1 34387431 34387696 266 34387571 15.00 9.10962 5.21257 6.94	957 E11.5_MANP_CHIP_HAND2_REP1_REP2_pooled_q0.01_peak_594
c	hr1 34389570 34389957 388 34389728 30.00 24.99298 10.09936 22	.42290 E11.5_MANP_CHIP_HAND2_REP1_REP2_pooled_q0.01_peak_595
c	hr1 34409749 34410001 253 34409876 19.00 12.92276 6.51572 10.	62788 E11.5_MANP_CHIP_HAND2_REP1_REP2_pooled_q0.01_peak_596
c	hr1 34439325 34439612 288 34439419 14.00 8.21768 4.88679 6.09	597 E11.5_MANP_CHIP_HAND2_REP1_REP2_pooled_q0.01_peak_597
c	hr1 34479426 34479660 235 34479527 14.00 6.53621 3.94387 4.50	495 E11.5_MANP_CHIP_HAND2_REP1_REP2_pooled_q0.01_peak_598
c	hr1 34655973 34656161 189 34656053 11.00 5.71447 3.90943 3.73	470 E11.5_MANP_CHIP_HAND2_REP1_REP2_pooled_q0.01_peak_599
c	hr1 34674540 34674728 189 34674638 12.00 6.51816 4.23522 4.49	107 E11.5_MANP_CHIP_HAND2_REP1_REP2_pooled_q0.01_peak_600
c	hr1 34707153 34707517 365 34707357 24.00 12.77095 5.42966 10.	49708 E11.5_MANP_CHIP_HAND2_REP1_REP2_pooled_q0.01_peak_601
c	hr1 34760516 34760751 236 34760641 16.00 10.02746 5.53836 7.8	3127 E11.5_MANP_CHIP_HAND2_REP1_REP2_pooled_q0.01_peak_602
c	hr1 34782277 34782713 437 34782455 18.00 11.93525 6.18993 9.6	7149 E11.5_MANP_CHIP_HAND2_REP1_REP2_pooled_q0.01_peak_603
c	hr1 34783084 34784400 1317 34783251 26.00 20.37413 8.79622 17	.89234 E11.5_MANP_CHIP_HAND2_REP1_REP2_pooled_q0.01_peak_604a
c	hr1 34783084 34784400 1317 34783737 107.00 140.89906 35.18487	137.31900 E11.5_MANP_CHIP_HAND2_REP1_REP2_pooled_q0.01_peak_604b
c	hr1 34783084 34784400 1317 34783974 160.00 236.91901 52.45152	232.78479 E11.5_MANP_CHIP_HAND2_REP1_REP2_pooled_q0.01_peak_604c
c	hr1 34793731 34793999 269 34793849 10.00 4.94456 3.58364 3.01	655 E11.5_MANP_CHIP_HAND2_REP1_REP2_pooled_q0.01_peak_605
c	hr1 34801779 34801967 189 34801869 11.00 5.06783 3.52641 3.13	367 E11.5_MANP_CHIP_HAND2_REP1_REP2_pooled_q0.01_peak_606
c	hr1 34829432 34829629 198 34829523 11.00 5.71447 3.90943 3.73	470 E11.5_MANP_CHIP_HAND2_REP1_REP2_pooled_q0.01_peak_607
c	hr1 34832269 34832490 222 34832384 13.00 6.57881 4.11415 4.54	160 E11.5_MANP_CHIP_HAND2_REP1_REP2_pooled_q0.01_peak_608
c	hr1 34836481 34836669 189 34836628 15.00 7.29785 4.20679 5.25	202 E11.5_MANP_CHIP_HAND2_REP1_REP2_pooled_q0.01_peak_609
c	hr1 34841380 34841724 345 34841541 35.00 31.07319 11.72829 28	.40628 E11.5_MANP_CHIP_HAND2_REP1_REP2_pooled_q0.01_peak_610
c	hr1 34842613 34843477 865 34843013 68.00 61.35474 14.98587 58	.34689 E11.5_MANP_CHIP_HAND2_REP1_REP2_pooled_q0.01_peak_611a
c	hr1 34842613 34843477 865 34843436 10.00 4.94456 3.58364 3.01	655 E11.5_MANP_CHIP_HAND2_REP1_REP2_pooled_q0.01_peak_611b
c	hr1 34849842 34850068 227 34849953 13.00 5.14992 3.33028 3.21	093 E11.5_MANP_CHIP_HAND2_REP1_REP2_pooled_q0.01_peak_612
c	hr1 34867245 34867502 258 34867385 31.00 26.18317 10.42515 23	.59259 E11.5_MANP_CHIP_HAND2_REP1_REP2_pooled_q0.01_peak_613
c	hr1 34895064 34895399 336 34895219 26.00 20.37413 8.79622 17.	89234 E11.5_MANP_CHIP_HAND2_REP1_REP2_pooled_q0.01_peak_614
c	hr1 35020707 35021001 295 35020848 19.00 8.73400 4.34373 6.60	991 E11.5_MANP_CHIP_HAND2_REP1_REP2_pooled_q0.01_peak_615
c	hr1 35054811 35055042 232 35054923 16.00 10.02746 5.53836 7.8	3127 E11.5_MANP_CHIP_HAND2_REP1_REP2_pooled_q0.01_peak_616
c	hr1 35259415 35259658 244 35259522 17.00 9.93841 5.28962 7.76	693 E11.5_MANP_CHIP_HAND2_REP1_REP2_pooled_q0.01_peak_617
c	hr1 35420068 35420256 189 35420192 13.00 7.35325 4.56100 5.27	687 E11.5_MANP_CHIP_HAND2_REP1_REP2_pooled_q0.01_peak_618
c	hr1 35575246 35575511 266 35575367 14.00 8.08274 4.80869 5.99	617 E11.5_MANP_CHIP_HAND2_REP1_REP2_pooled_q0.01_peak_619
c	hr1 35579997 35580591 595 35580384 51.00 52.36312 16.94086 49	.43733 E11.5_MANP_CHIP_HAND2_REP1_REP2_pooled_q0.01_peak_620
c	hr1 35582500 35582917 418 35582637 16.00 10.02746 5.53836 7.8	3127 E11.5_MANP_CHIP_HAND2_REP1_REP2_pooled_q0.01_peak_621
c	hr1 35631734 35632101 368 35631897 33.00 28.60308 11.07672 25	.97338 E11.5_MANP_CHIP_HAND2_REP1_REP2_pooled_q0.01_peak_622
c	hr1 35650937 35651370 434 35651027 14.00 8.21768 4.88679 6.09	597 E11.5_MANP_CHIP_HAND2_REP1_REP2_pooled_q0.01_peak_623a
c	hr1 35650937 35651370 434 35651314 16.00 9.21304 5.08005 7.05	260 E11.5_MANP_CHIP_HAND2_REP1_REP2_pooled_q0.01_peak_623b
c	hr1 35685749 35686277 529 35686091 35.00 31.07319 11.72829 28	.40628 E11.5_MANP_CHIP_HAND2_REP1_REP2_pooled_q0.01_peak_624
c	hr1 35696849 35697462 614 35696990 20.00 13.93124 6.84150 11.	60594 E11.5_MANP_CHIP_HAND2_REP1_REP2_pooled_q0.01_peak_625a
c	hr1 35696849 35697462 614 35697338 18.00 11.93525 6.18993 9.6	7149 E11.5_MANP_CHIP_HAND2_REP1_REP2_pooled_q0.01_peak_625b
c	hr1 35734601 35734897 297 35734721 15.00 9.10962 5.21257 6.94	957 E11.5_MANP_CHIP_HAND2_REP1_REP2_pooled_q0.01_peak_626
c	hr1 35758807 35759170 364 35758909 17.00 9.93841 5.28962 7.76	693 E11.5_MANP_CHIP_HAND2_REP1_REP2_pooled_q0.01_peak_627
c	hr1 35822487 35822688 202 35822635 12.00 5.80770 3.82028 3.81	936 E11.5_MANP_CHIP_HAND2_REP1_REP2_pooled_q0.01_peak_628
c	hr1 35823784 35824017 234 35823902 16.00 10.02746 5.53836 7.8	3127 E11.5_MANP_CHIP_HAND2_REP1_REP2_pooled_q0.01_peak_629
c	hr1 35824168 35824564 397 35824352 33.00 28.60308 11.07672 25	.97338 E11.5_MANP_CHIP_HAND2_REP1_REP2_pooled_q0.01_peak_630
c	hr1 35825499 35825688 190 35825585 15.00 9.10962 5.21257 6.94	957 E11.5_MANP_CHIP_HAND2_REP1_REP2_pooled_q0.01_peak_631
c	hr1 35843160 35843880 721 35843482 68.00 77.32431 22.47923 74	.17805 E11.5_MANP_CHIP_HAND2_REP1_REP2_pooled_q0.01_peak_632
c	hr1 35870767 35871073 307 35870895 15.00 9.10962 5.21257 6.94	957 E11.5_MANP_CHIP_HAND2_REP1_REP2_pooled_q0.01_peak_633
c	hr1 35889898 35890086 189 35890018 11.00 5.06783 3.52641 3.13	367 E11.5_MANP_CHIP_HAND2_REP1_REP2_pooled_q0.01_peak_634
c	hr1 35904726 35905115 390 35904881 37.00 31.26661 11.16697 28	.59579 E11.5_MANP_CHIP_HAND2_REP1_REP2_pooled_q0.01_peak_635
c	hr1 35905709 35906225 517 35906043 42.00 39.65343 13.78492 36	.87509 E11.5_MANP_CHIP_HAND2_REP1_REP2_pooled_q0.01_peak_636
c	hr1 35926135 35926457 323 35926296 30.00 24.99298 10.09936 22	.42290 E11.5_MANP_CHIP_HAND2_REP1_REP2_pooled_q0.01_peak_637
c	hr1 35953655 35954112 458 35953914 43.00 41.40486 14.33458 38	.59886 E11.5_MANP_CHIP_HAND2_REP1_REP2_pooled_q0.01_peak_638
c	hr1 35959195 35959408 214 35959306 14.00 7.37914 4.40802 5.29	814 E11.5_MANP_CHIP_HAND2_REP1_REP2_pooled_q0.01_peak_639
c	hr1 35968558 35968999 442 35968667 17.00 10.96977 5.86415 8.7	3922 E11.5_MANP_CHIP_HAND2_REP1_REP2_pooled_q0.01_peak_640
c	hr1 35969372 35969560 189 35969463 14.00 8.21768 4.88679 6.09	597 E11.5_MANP_CHIP_HAND2_REP1_REP2_pooled_q0.01_peak_641
c	hr1 35978230 35978950 721 35978358 22.00 16.00735 7.49307 13.	62655 E11.5_MANP_CHIP_HAND2_REP1_REP2_pooled_q0.01_peak_642a
c	hr1 35978230 35978950 721 35978804 17.00 10.96977 5.86415 8.7	3922 E11.5_MANP_CHIP_HAND2_REP1_REP2_pooled_q0.01_peak_642b
c	hr1 35982137 35982636 500 35982394 76.00 79.89206 20.24518 76	.72894 E11.5_MANP_CHIP_HAND2_REP1_REP2_pooled_q0.01_peak_643
c	hr1 35983385 35983617 233 35983504 20.00 12.70653 6.17122 10.	43389 E11.5_MANP_CHIP_HAND2_REP1_REP2_pooled_q0.01_peak_644
c	hr1 35986673 35987054 382 35986841 48.00 34.96062 9.79056 32.	23590 E11.5_MANP_CHIP_HAND2_REP1_REP2_pooled_q0.01_peak_645
c	hr1 35992354 35993185 832 35992461 16.00 8.62343 4.75724 6.50	035 E11.5_MANP_CHIP_HAND2_REP1_REP2_pooled_q0.01_peak_646a
c	hr1 35992354 35993185 832 35992810 42.00 40.07680 14.00879 37	.28658 E11.5_MANP_CHIP_HAND2_REP1_REP2_pooled_q0.01_peak_646b
c	hr1 36012839 36013094 256 36012971 20.00 13.93124 6.84150 11.	60594 E11.5_MANP_CHIP_HAND2_REP1_REP2_pooled_q0.01_peak_647
c	hr1 36016849 36017575 727 36017284 48.00 48.18712 15.96351 45	.30497 E11.5_MANP_CHIP_HAND2_REP1_REP2_pooled_q0.01_peak_648
c	hr1 36019250 36019523 274 36019384 25.00 19.25736 8.47043 16.	79900 E11.5_MANP_CHIP_HAND2_REP1_REP2_pooled_q0.01_peak_649
c	hr1 36020912 36021122 211 36021012 17.00 10.96977 5.86415 8.7	3922 E11.5_MANP_CHIP_HAND2_REP1_REP2_pooled_q0.01_peak_650
c	hr1 36030530 36030770 241 36030654 18.00 11.93525 6.18993 9.6	7149 E11.5_MANP_CHIP_HAND2_REP1_REP2_pooled_q0.01_peak_651
c	hr1 36068039 36068442 404 36068254 23.00 17.07331 7.81886 14.	66632 E11.5_MANP_CHIP_HAND2_REP1_REP2_pooled_q0.01_peak_652
c	hr1 36118987 36119231 245 36119108 17.00 10.96977 5.86415 8.7	3922 E11.5_MANP_CHIP_HAND2_REP1_REP2_pooled_q0.01_peak_653
c	hr1 36129113 36129377 265 36129238 19.00 12.92276 6.51572 10.	62788 E11.5_MANP_CHIP_HAND2_REP1_REP2_pooled_q0.01_peak_654
c	hr1 36244102 36244480 379 36244304 23.00 11.92709 5.21248 9.6	7149 E11.5_MANP_CHIP_HAND2_REP1_REP2_pooled_q0.01_peak_655
c	hr1 36250732 36251237 506 36250954 47.00 40.79715 12.62037 38	.00343 E11.5_MANP_CHIP_HAND2_REP1_REP2_pooled_q0.01_peak_656
c	hr1 36270589 36270777 189 36270697 14.00 8.21768 4.88679 6.09	597 E11.5_MANP_CHIP_HAND2_REP1_REP2_pooled_q0.01_peak_657
c	hr1 36273400 36273827 428 36273568 17.00 10.96977 5.86415 8.7	3922 E11.5_MANP_CHIP_HAND2_REP1_REP2_pooled_q0.01_peak_658
c	hr1 36307617 36308165 549 36307989 12.00 6.51816 4.23522 4.49	107 E11.5_MANP_CHIP_HAND2_REP1_REP2_pooled_q0.01_peak_659
c	hr1 36323839 36324066 228 36323932 14.00 8.21768 4.88679 6.09	597 E11.5_MANP_CHIP_HAND2_REP1_REP2_pooled_q0.01_peak_660
c	hr1 36332073 36332563 491 36332348 63.00 58.10982 15.22412 55	.12894 E11.5_MANP_CHIP_HAND2_REP1_REP2_pooled_q0.01_peak_661
c	hr1 36445161 36445616 456 36445423 52.00 52.46974 16.58820 49	.54361 E11.5_MANP_CHIP_HAND2_REP1_REP2_pooled_q0.01_peak_662
c	hr1 36511658 36512119 462 36511842 31.00 20.58585 7.61206 18.	10260 E11.5_MANP_CHIP_HAND2_REP1_REP2_pooled_q0.01_peak_663
c	hr1 36547218 36548325 1108 36547525 25.00 19.25736 8.47043 16	.79900 E11.5_MANP_CHIP_HAND2_REP1_REP2_pooled_q0.01_peak_664a
c	hr1 36547218 36548325 1108 36548083 28.00 22.65424 9.44779 20	.12667 E11.5_MANP_CHIP_HAND2_REP1_REP2_pooled_q0.01_peak_664b
c	hr1 36555906 36556286 381 36556086 31.00 20.58585 7.61206 18.	10260 E11.5_MANP_CHIP_HAND2_REP1_REP2_pooled_q0.01_peak_665
c	hr1 36556429 36557825 1397 36556723 32.00 18.73851 6.59364 16	.30162 E11.5_MANP_CHIP_HAND2_REP1_REP2_pooled_q0.01_peak_666a
c	hr1 36556429 36557825 1397 36557464 20.00 11.46573 5.52141 9.	22995 E11.5_MANP_CHIP_HAND2_REP1_REP2_pooled_q0.01_peak_666b
c	hr1 36558120 36558539 420 36558249 20.00 12.70653 6.17122 10.	43389 E11.5_MANP_CHIP_HAND2_REP1_REP2_pooled_q0.01_peak_667
c	hr1 36572553 36572741 189 36572643 14.00 8.21768 4.88679 6.09	597 E11.5_MANP_CHIP_HAND2_REP1_REP2_pooled_q0.01_peak_668
c	hr1 36575466 36575654 189 36575622 13.00 6.57881 4.11415 4.54	160 E11.5_MANP_CHIP_HAND2_REP1_REP2_pooled_q0.01_peak_669
c	hr1 36580028 36580962 935 36580541 59.00 63.85201 19.54715 60	.81952 E11.5_MANP_CHIP_HAND2_REP1_REP2_pooled_q0.01_peak_670
c	hr1 36584162 36584519 358 36584363 32.00 27.38667 10.75093 24	.77647 E11.5_MANP_CHIP_HAND2_REP1_REP2_pooled_q0.01_peak_671
c	hr1 36585784 36586122 339 36585889 16.00 10.02746 5.53836 7.8	3127 E11.5_MANP_CHIP_HAND2_REP1_REP2_pooled_q0.01_peak_672
c	hr1 36588057 36589371 1315 36588597 86.00 100.23147 25.56649	96.91679 E11.5_MANP_CHIP_HAND2_REP1_REP2_pooled_q0.01_peak_673a
c	hr1 36588057 36589371 1315 36589234 20.00 13.93124 6.84150 11	.60594 E11.5_MANP_CHIP_HAND2_REP1_REP2_pooled_q0.01_peak_673b
c	hr1 36620611 36621130 520 36620931 30.00 24.99298 10.09936 22	.42290 E11.5_MANP_CHIP_HAND2_REP1_REP2_pooled_q0.01_peak_674
c	hr1 36684138 36684466 329 36684313 37.00 33.59076 12.37986 30	.88588 E11.5_MANP_CHIP_HAND2_REP1_REP2_pooled_q0.01_peak_675
c	hr1 36691242 36691686 445 36691385 29.00 23.81653 9.77358 21.	26746 E11.5_MANP_CHIP_HAND2_REP1_REP2_pooled_q0.01_peak_676
c	hr1 36709775 36710247 473 36709972 29.00 22.01025 8.81603 19.	50099 E11.5_MANP_CHIP_HAND2_REP1_REP2_pooled_q0.01_peak_677
c	hr1 36723552 36723894 343 36723703 26.00 20.37413 8.79622 17.	89234 E11.5_MANP_CHIP_HAND2_REP1_REP2_pooled_q0.01_peak_678
c	hr1 36737561 36737819 259 36737688 17.00 10.96977 5.86415 8.7	3922 E11.5_MANP_CHIP_HAND2_REP1_REP2_pooled_q0.01_peak_679
c	hr1 36766793 36767230 438 36767086 32.00 27.38667 10.75093 24	.77647 E11.5_MANP_CHIP_HAND2_REP1_REP2_pooled_q0.01_peak_680
c	hr1 36784760 36785051 292 36784919 23.00 17.07331 7.81886 14.	66632 E11.5_MANP_CHIP_HAND2_REP1_REP2_pooled_q0.01_peak_681
c	hr1 36804524 36804794 271 36804652 27.00 18.12257 7.36188 15.	70515 E11.5_MANP_CHIP_HAND2_REP1_REP2_pooled_q0.01_peak_682
c	hr1 36860409 36860801 393 36860542 25.00 17.70976 7.64056 15.	29538 E11.5_MANP_CHIP_HAND2_REP1_REP2_pooled_q0.01_peak_683
c	hr1 36861771 36861987 217 36861880 16.00 10.02746 5.53836 7.8	3127 E11.5_MANP_CHIP_HAND2_REP1_REP2_pooled_q0.01_peak_684
c	hr1 36888731 36888981 251 36888859 19.00 12.92276 6.51572 10.	62788 E11.5_MANP_CHIP_HAND2_REP1_REP2_pooled_q0.01_peak_685
c	hr1 36919867 36920090 224 36919953 11.00 5.71447 3.90943 3.73	470 E11.5_MANP_CHIP_HAND2_REP1_REP2_pooled_q0.01_peak_686
c	hr1 36938173 36938361 189 36938294 14.00 7.37914 4.40802 5.29	814 E11.5_MANP_CHIP_HAND2_REP1_REP2_pooled_q0.01_peak_687
c	hr1 36939351 36939557 207 36939458 13.00 6.57881 4.11415 4.54	160 E11.5_MANP_CHIP_HAND2_REP1_REP2_pooled_q0.01_peak_688
c	hr1 36939787 36939990 204 36939880 14.00 8.21768 4.88679 6.09	597 E11.5_MANP_CHIP_HAND2_REP1_REP2_pooled_q0.01_peak_689
c	hr1 36947816 36948033 218 36947925 14.00 8.21768 4.88679 6.09	597 E11.5_MANP_CHIP_HAND2_REP1_REP2_pooled_q0.01_peak_690
c	hr1 36979739 36980128 390 36979986 23.00 17.07331 7.81886 14.	66632 E11.5_MANP_CHIP_HAND2_REP1_REP2_pooled_q0.01_peak_691
c	hr1 36995635 36996109 475 36995933 57.00 60.93423 18.89558 57	.92719 E11.5_MANP_CHIP_HAND2_REP1_REP2_pooled_q0.01_peak_692
c	hr1 37004532 37004935 404 37004738 70.00 63.93811 15.42024 60	.90505 E11.5_MANP_CHIP_HAND2_REP1_REP2_pooled_q0.01_peak_693
c	hr1 37013699 37014049 351 37013879 72.00 74.17033 19.19348 71	.05572 E11.5_MANP_CHIP_HAND2_REP1_REP2_pooled_q0.01_peak_694
c	hr1 37028833 37029722 890 37029424 27.00 18.12257 7.36188 15.	70515 E11.5_MANP_CHIP_HAND2_REP1_REP2_pooled_q0.01_peak_695
c	hr1 37031813 37032024 212 37031925 16.00 10.02746 5.53836 7.8	3127 E11.5_MANP_CHIP_HAND2_REP1_REP2_pooled_q0.01_peak_696
c	hr1 37045532 37045841 310 37045728 17.00 6.59778 3.59653 4.56	028 E11.5_MANP_CHIP_HAND2_REP1_REP2_pooled_q0.01_peak_697
c	hr1 37053802 37054120 319 37053924 13.00 7.35325 4.56100 5.27	687 E11.5_MANP_CHIP_HAND2_REP1_REP2_pooled_q0.01_peak_698
c	hr1 37056945 37057243 299 37057071 19.00 9.59281 4.75754 7.42	940 E11.5_MANP_CHIP_HAND2_REP1_REP2_pooled_q0.01_peak_699
c	hr1 37062342 37062605 264 37062460 18.00 11.93525 6.18993 9.6	7149 E11.5_MANP_CHIP_HAND2_REP1_REP2_pooled_q0.01_peak_700
c	hr1 37083062 37083339 278 37083200 20.00 13.93124 6.84150 11.	60594 E11.5_MANP_CHIP_HAND2_REP1_REP2_pooled_q0.01_peak_701
c	hr1 37092913 37093178 266 37093034 13.00 5.80187 3.68094 3.81	871 E11.5_MANP_CHIP_HAND2_REP1_REP2_pooled_q0.01_peak_702
c	hr1 37097505 37098056 552 37097898 34.00 29.83204 11.40250 27	.18352 E11.5_MANP_CHIP_HAND2_REP1_REP2_pooled_q0.01_peak_703
c	hr1 37111781 37112510 730 37111909 24.00 18.15687 8.14465 15.	72300 E11.5_MANP_CHIP_HAND2_REP1_REP2_pooled_q0.01_peak_704a
c	hr1 37111781 37112510 730 37112208 103.00 134.05287 33.88173	130.51387 E11.5_MANP_CHIP_HAND2_REP1_REP2_pooled_q0.01_peak_704b
c	hr1 37115630 37115842 213 37115756 12.00 6.51816 4.23522 4.49	107 E11.5_MANP_CHIP_HAND2_REP1_REP2_pooled_q0.01_peak_705
c	hr1 37121906 37123750 1845 37122461 254.00 316.02908 38.59690	311.41431 E11.5_MANP_CHIP_HAND2_REP1_REP2_pooled_q0.01_peak_706a
c	hr1 37121906 37123750 1845 37123048 43.00 41.40486 14.33458 3	8.59886 E11.5_MANP_CHIP_HAND2_REP1_REP2_pooled_q0.01_peak_706b
c	hr1 37121906 37123750 1845 37123379 15.00 9.10962 5.21257 6.9	4957 E11.5_MANP_CHIP_HAND2_REP1_REP2_pooled_q0.01_peak_706c
c	hr1 37121906 37123750 1845 37123661 10.00 4.36154 3.23254 2.4	8331 E11.5_MANP_CHIP_HAND2_REP1_REP2_pooled_q0.01_peak_706d
c	hr1 37124305 37125647 1343 37124805 216.00 318.40231 57.05460	313.77264 E11.5_MANP_CHIP_HAND2_REP1_REP2_pooled_q0.01_peak_707a
c	hr1 37124305 37125647 1343 37125228 300.00 506.48761 89.94676	499.57639 E11.5_MANP_CHIP_HAND2_REP1_REP2_pooled_q0.01_peak_707b
c	hr1 37131231 37131632 402 37131406 31.00 26.18317 10.42515 23	.59259 E11.5_MANP_CHIP_HAND2_REP1_REP2_pooled_q0.01_peak_708
c	hr1 37186898 37187093 196 37186986 14.00 8.21768 4.88679 6.09	597 E11.5_MANP_CHIP_HAND2_REP1_REP2_pooled_q0.01_peak_709
c	hr1 37218392 37218723 332 37218597 11.00 4.42234 3.15509 2.54	071 E11.5_MANP_CHIP_HAND2_REP1_REP2_pooled_q0.01_peak_710
c	hr1 37219949 37220912 964 37220392 288.00 382.49496 46.56584	377.34204 E11.5_MANP_CHIP_HAND2_REP1_REP2_pooled_q0.01_peak_711
c	hr1 37221643 37222608 966 37222175 257.00 313.45554 36.81911	308.85538 E11.5_MANP_CHIP_HAND2_REP1_REP2_pooled_q0.01_peak_712
c	hr1 37230545 37230833 289 37230689 31.00 22.27342 8.41358 19.	76193 E11.5_MANP_CHIP_HAND2_REP1_REP2_pooled_q0.01_peak_713
c	hr1 37230972 37231948 977 37231573 164.00 205.41382 35.83577	201.46030 E11.5_MANP_CHIP_HAND2_REP1_REP2_pooled_q0.01_peak_714
c	hr1 37237394 37237997 604 37237699 40.00 37.45079 13.35722 34	.69261 E11.5_MANP_CHIP_HAND2_REP1_REP2_pooled_q0.01_peak_715
c	hr1 37288261 37288461 201 37288345 12.00 6.51816 4.23522 4.49	107 E11.5_MANP_CHIP_HAND2_REP1_REP2_pooled_q0.01_peak_716
c	hr1 37341944 37342267 324 37342102 27.00 21.50661 9.12200 19.	00221 E11.5_MANP_CHIP_HAND2_REP1_REP2_pooled_q0.01_peak_717
c	hr1 37359333 37359525 193 37359416 15.00 8.20688 4.70188 6.09	597 E11.5_MANP_CHIP_HAND2_REP1_REP2_pooled_q0.01_peak_718
c	hr1 37376726 37377099 374 37376947 18.00 8.79363 4.51966 6.66	770 E11.5_MANP_CHIP_HAND2_REP1_REP2_pooled_q0.01_peak_719
c	hr1 37384397 37384863 467 37384597 65.00 68.63511 19.39527 65	.56114 E11.5_MANP_CHIP_HAND2_REP1_REP2_pooled_q0.01_peak_720
c	hr1 37386392 37386866 475 37386588 26.00 13.43988 5.39480 11.	14074 E11.5_MANP_CHIP_HAND2_REP1_REP2_pooled_q0.01_peak_721
c	hr1 37396981 37397275 295 37397062 11.00 5.71447 3.90943 3.73	470 E11.5_MANP_CHIP_HAND2_REP1_REP2_pooled_q0.01_peak_722
c	hr1 37430221 37430462 242 37430412 9.00 4.12712 3.20580 2.300	05 E11.5_MANP_CHIP_HAND2_REP1_REP2_pooled_q0.01_peak_723
c	hr1 37512229 37513325 1097 37512460 32.00 27.38667 10.75093 2	4.77647 E11.5_MANP_CHIP_HAND2_REP1_REP2_pooled_q0.01_peak_724a
c	hr1 37512229 37513325 1097 37513177 25.00 19.25736 8.47043 16	.79900 E11.5_MANP_CHIP_HAND2_REP1_REP2_pooled_q0.01_peak_724b
c	hr1 37540914 37541579 666 37541316 36.00 32.32619 12.05408 29	.64147 E11.5_MANP_CHIP_HAND2_REP1_REP2_pooled_q0.01_peak_725
c	hr1 37547729 37547995 267 37547871 19.00 11.76255 5.87735 9.5	2147 E11.5_MANP_CHIP_HAND2_REP1_REP2_pooled_q0.01_peak_726
c	hr1 37555176 37555454 279 37555314 28.00 15.14900 5.79441 12.	79501 E11.5_MANP_CHIP_HAND2_REP1_REP2_pooled_q0.01_peak_727
c	hr1 37584128 37584636 509 37584390 70.00 75.92635 20.86460 72	.79040 E11.5_MANP_CHIP_HAND2_REP1_REP2_pooled_q0.01_peak_728
c	hr1 37610885 37611477 593 37611182 68.00 72.99103 20.27687 69	.87981 E11.5_MANP_CHIP_HAND2_REP1_REP2_pooled_q0.01_peak_729
c	hr1 37616643 37616975 333 37616816 22.00 14.58194 6.72099 12.	25220 E11.5_MANP_CHIP_HAND2_REP1_REP2_pooled_q0.01_peak_730
c	hr1 37638996 37639250 255 37639112 13.00 7.35325 4.56100 5.27	687 E11.5_MANP_CHIP_HAND2_REP1_REP2_pooled_q0.01_peak_731
c	hr1 37641107 37641332 226 37641221 17.00 10.56071 5.63373 8.3	6043 E11.5_MANP_CHIP_HAND2_REP1_REP2_pooled_q0.01_peak_732
c	hr1 37864817 37865252 436 37864896 12.00 6.51816 4.23522 4.49	107 E11.5_MANP_CHIP_HAND2_REP1_REP2_pooled_q0.01_peak_733
c	hr1 37871784 37872485 702 37871970 23.00 17.07331 7.81886 14.	66632 E11.5_MANP_CHIP_HAND2_REP1_REP2_pooled_q0.01_peak_734
c	hr1 37983508 37983807 300 37983666 23.00 17.07331 7.81886 14.	66632 E11.5_MANP_CHIP_HAND2_REP1_REP2_pooled_q0.01_peak_735
c	hr1 37997813 37998317 505 37998003 25.00 19.25736 8.47043 16.	79900 E11.5_MANP_CHIP_HAND2_REP1_REP2_pooled_q0.01_peak_736
c	hr1 38103686 38104307 622 38104010 138.00 151.36963 25.71549	147.72710 E11.5_MANP_CHIP_HAND2_REP1_REP2_pooled_q0.01_peak_737
c	hr1 38129609 38130247 639 38129754 18.00 11.93525 6.18993 9.6	7149 E11.5_MANP_CHIP_HAND2_REP1_REP2_pooled_q0.01_peak_738a
c	hr1 38129609 38130247 639 38130037 18.00 11.93525 6.18993 9.6	7149 E11.5_MANP_CHIP_HAND2_REP1_REP2_pooled_q0.01_peak_738b
c	hr1 38193424 38193741 318 38193595 32.00 21.60005 7.84994 19.	09409 E11.5_MANP_CHIP_HAND2_REP1_REP2_pooled_q0.01_peak_739
c	hr1 38200248 38200587 340 38200433 19.00 12.92276 6.51572 10.	62788 E11.5_MANP_CHIP_HAND2_REP1_REP2_pooled_q0.01_peak_740
c	hr1 38207881 38208432 552 38208250 33.00 28.60308 11.07672 25	.97338 E11.5_MANP_CHIP_HAND2_REP1_REP2_pooled_q0.01_peak_741
c	hr1 38212229 38213163 935 38212476 36.00 32.32619 12.05408 29	.64147 E11.5_MANP_CHIP_HAND2_REP1_REP2_pooled_q0.01_peak_742a
c	hr1 38212229 38213163 935 38213043 18.00 11.93525 6.18993 9.6	7149 E11.5_MANP_CHIP_HAND2_REP1_REP2_pooled_q0.01_peak_742b
c	hr1 38216276 38216644 369 38216402 13.00 7.35325 4.56100 5.27	687 E11.5_MANP_CHIP_HAND2_REP1_REP2_pooled_q0.01_peak_743
c	hr1 38225300 38225488 189 38225409 13.00 7.35325 4.56100 5.27	687 E11.5_MANP_CHIP_HAND2_REP1_REP2_pooled_q0.01_peak_744
c	hr1 38230577 38230855 279 38230754 12.00 6.51816 4.23522 4.49	107 E11.5_MANP_CHIP_HAND2_REP1_REP2_pooled_q0.01_peak_745
c	hr1 38237878 38238177 300 38238027 26.00 15.72270 6.42267 13.	36093 E11.5_MANP_CHIP_HAND2_REP1_REP2_pooled_q0.01_peak_746
c	hr1 38241457 38242247 791 38241556 13.00 7.35325 4.56100 5.27	687 E11.5_MANP_CHIP_HAND2_REP1_REP2_pooled_q0.01_peak_747a
c	hr1 38241457 38242247 791 38242076 43.00 41.40486 14.33458 38	.59886 E11.5_MANP_CHIP_HAND2_REP1_REP2_pooled_q0.01_peak_747b
c	hr1 38247962 38248543 582 38248221 52.00 53.77185 17.26665 50	.83202 E11.5_MANP_CHIP_HAND2_REP1_REP2_pooled_q0.01_peak_748
c	hr1 38262315 38262925 611 38262542 21.00 12.36316 5.78434 10.	09529 E11.5_MANP_CHIP_HAND2_REP1_REP2_pooled_q0.01_peak_749a
c	hr1 38262315 38262925 611 38262735 24.00 18.15687 8.14465 15.	72300 E11.5_MANP_CHIP_HAND2_REP1_REP2_pooled_q0.01_peak_749b
c	hr1 38304423 38304803 381 38304590 44.00 40.40585 13.44719 37	.61503 E11.5_MANP_CHIP_HAND2_REP1_REP2_pooled_q0.01_peak_750
c	hr1 38308735 38309174 440 38308976 23.00 15.65495 7.05282 13.	29422 E11.5_MANP_CHIP_HAND2_REP1_REP2_pooled_q0.01_peak_751
c	hr1 38320596 38320995 400 38320781 27.00 18.12257 7.36188 15.	70515 E11.5_MANP_CHIP_HAND2_REP1_REP2_pooled_q0.01_peak_752
c	hr1 38357944 38358682 739 38358377 81.00 97.66383 26.71444 94	.36423 E11.5_MANP_CHIP_HAND2_REP1_REP2_pooled_q0.01_peak_753
c	hr1 38363064 38363262 199 38363162 15.00 8.75130 5.00776 6.62	658 E11.5_MANP_CHIP_HAND2_REP1_REP2_pooled_q0.01_peak_754
c	hr1 38363684 38364338 655 38364077 17.00 9.93841 5.28962 7.76	693 E11.5_MANP_CHIP_HAND2_REP1_REP2_pooled_q0.01_peak_755
c	hr1 38365989 38366187 199 38366096 13.00 6.57881 4.11415 4.54	160 E11.5_MANP_CHIP_HAND2_REP1_REP2_pooled_q0.01_peak_756
c	hr1 38388420 38388949 530 38388688 68.00 77.32431 22.47923 74	.17805 E11.5_MANP_CHIP_HAND2_REP1_REP2_pooled_q0.01_peak_757
c	hr1 38393636 38393909 274 38393754 21.00 14.95972 7.16729 12.	60612 E11.5_MANP_CHIP_HAND2_REP1_REP2_pooled_q0.01_peak_758
c	hr1 38394217 38394523 307 38394384 23.00 14.21446 6.31019 11.	88655 E11.5_MANP_CHIP_HAND2_REP1_REP2_pooled_q0.01_peak_759
c	hr1 38395629 38395898 270 38395757 17.00 9.93841 5.28962 7.76	693 E11.5_MANP_CHIP_HAND2_REP1_REP2_pooled_q0.01_peak_760
c	hr1 38399402 38399720 319 38399564 30.00 24.99298 10.09936 22	.42290 E11.5_MANP_CHIP_HAND2_REP1_REP2_pooled_q0.01_peak_761
c	hr1 38406591 38406900 310 38406800 15.00 8.54642 4.89187 6.42	355 E11.5_MANP_CHIP_HAND2_REP1_REP2_pooled_q0.01_peak_762
c	hr1 38418212 38418678 467 38418482 35.00 24.71849 8.56357 22.	16209 E11.5_MANP_CHIP_HAND2_REP1_REP2_pooled_q0.01_peak_763
c	hr1 38436498 38436972 475 38436670 25.00 14.79496 6.18480 12.	46046 E11.5_MANP_CHIP_HAND2_REP1_REP2_pooled_q0.01_peak_764
c	hr1 38438510 38438724 215 38438609 13.00 7.35325 4.56100 5.27	687 E11.5_MANP_CHIP_HAND2_REP1_REP2_pooled_q0.01_peak_765
c	hr1 38448916 38449254 339 38449033 20.00 13.93124 6.84150 11.	60594 E11.5_MANP_CHIP_HAND2_REP1_REP2_pooled_q0.01_peak_766
c	hr1 38467506 38468221 716 38467950 129.00 179.63997 42.35216	175.83447 E11.5_MANP_CHIP_HAND2_REP1_REP2_pooled_q0.01_peak_767
c	hr1 38470223 38470889 667 38470457 37.00 31.14323 11.10424 28	.47610 E11.5_MANP_CHIP_HAND2_REP1_REP2_pooled_q0.01_peak_768a
c	hr1 38470223 38470889 667 38470707 37.00 20.84170 6.54520 18.	35793 E11.5_MANP_CHIP_HAND2_REP1_REP2_pooled_q0.01_peak_768b
c	hr1 38488741 38489121 381 38488949 55.00 40.66755 10.36020 37	.87510 E11.5_MANP_CHIP_HAND2_REP1_REP2_pooled_q0.01_peak_769
c	hr1 38490074 38490665 592 38490461 88.00 108.99431 28.99494 1	05.61726 E11.5_MANP_CHIP_HAND2_REP1_REP2_pooled_q0.01_peak_770
c	hr1 38497708 38498001 294 38497856 14.00 8.21768 4.88679 6.09	597 E11.5_MANP_CHIP_HAND2_REP1_REP2_pooled_q0.01_peak_771
c	hr1 38509034 38509245 212 38509140 11.00 5.71447 3.90943 3.73	470 E11.5_MANP_CHIP_HAND2_REP1_REP2_pooled_q0.01_peak_772
c	hr1 38511203 38511407 205 38511311 12.00 6.51816 4.23522 4.49	107 E11.5_MANP_CHIP_HAND2_REP1_REP2_pooled_q0.01_peak_773
c	hr1 38512089 38512932 844 38512334 67.00 60.07238 14.76868 57	.07748 E11.5_MANP_CHIP_HAND2_REP1_REP2_pooled_q0.01_peak_774a
c	hr1 38512089 38512932 844 38512708 42.00 38.42919 13.14690 35	.66676 E11.5_MANP_CHIP_HAND2_REP1_REP2_pooled_q0.01_peak_774b
c	hr1 38526640 38526960 321 38526811 24.00 17.91919 8.01449 15.	50388 E11.5_MANP_CHIP_HAND2_REP1_REP2_pooled_q0.01_peak_775
c	hr1 38528980 38529410 431 38529233 34.00 29.83204 11.40250 27	.18352 E11.5_MANP_CHIP_HAND2_REP1_REP2_pooled_q0.01_peak_776
c	hr1 38545637 38545963 327 38545803 34.00 23.66673 8.32569 21.	13151 E11.5_MANP_CHIP_HAND2_REP1_REP2_pooled_q0.01_peak_777
c	hr1 38546406 38546701 296 38546497 10.00 4.36154 3.23254 2.48	331 E11.5_MANP_CHIP_HAND2_REP1_REP2_pooled_q0.01_peak_778
c	hr1 38554427 38554963 537 38554671 69.00 78.85373 22.80501 75	.69546 E11.5_MANP_CHIP_HAND2_REP1_REP2_pooled_q0.01_peak_779
c	hr1 38566016 38566378 363 38566171 16.00 10.02746 5.53836 7.8	3127 E11.5_MANP_CHIP_HAND2_REP1_REP2_pooled_q0.01_peak_780
c	hr1 38578314 38578867 554 38578597 27.00 20.46235 8.56077 17.	98022 E11.5_MANP_CHIP_HAND2_REP1_REP2_pooled_q0.01_peak_781
c	hr1 38593614 38593895 282 38593756 26.00 20.37413 8.79622 17.	89234 E11.5_MANP_CHIP_HAND2_REP1_REP2_pooled_q0.01_peak_782
c	hr1 38601781 38601969 189 38601868 16.00 5.93889 3.39673 3.94	762 E11.5_MANP_CHIP_HAND2_REP1_REP2_pooled_q0.01_peak_783
c	hr1 38602074 38602450 377 38602288 17.00 9.93841 5.28962 7.76	693 E11.5_MANP_CHIP_HAND2_REP1_REP2_pooled_q0.01_peak_784
c	hr1 38606693 38607285 593 38607009 97.00 117.69530 28.79903 1	14.26173 E11.5_MANP_CHIP_HAND2_REP1_REP2_pooled_q0.01_peak_785
c	hr1 38607593 38607877 285 38607733 27.00 21.50661 9.12200 19.	00221 E11.5_MANP_CHIP_HAND2_REP1_REP2_pooled_q0.01_peak_786
c	hr1 38612451 38612738 288 38612569 22.00 12.11161 5.47117 9.8	4642 E11.5_MANP_CHIP_HAND2_REP1_REP2_pooled_q0.01_peak_787
c	hr1 38618788 38619144 357 38618990 23.00 17.07331 7.81886 14.	66632 E11.5_MANP_CHIP_HAND2_REP1_REP2_pooled_q0.01_peak_788
c	hr1 38627227 38627709 483 38627598 12.00 6.51816 4.23522 4.49	107 E11.5_MANP_CHIP_HAND2_REP1_REP2_pooled_q0.01_peak_789
c	hr1 38627850 38628209 360 38628030 17.00 9.93841 5.28962 7.76	693 E11.5_MANP_CHIP_HAND2_REP1_REP2_pooled_q0.01_peak_790
c	hr1 38629227 38629526 300 38629385 22.00 16.00735 7.49307 13.	62655 E11.5_MANP_CHIP_HAND2_REP1_REP2_pooled_q0.01_peak_791
c	hr1 38647956 38648210 255 38648085 14.00 8.21768 4.88679 6.09	597 E11.5_MANP_CHIP_HAND2_REP1_REP2_pooled_q0.01_peak_792
c	hr1 38650757 38650945 189 38650850 12.00 6.07446 3.97464 4.08	232 E11.5_MANP_CHIP_HAND2_REP1_REP2_pooled_q0.01_peak_793
c	hr1 38659299 38659778 480 38659506 28.00 22.65424 9.44779 20.	12667 E11.5_MANP_CHIP_HAND2_REP1_REP2_pooled_q0.01_peak_794
c	hr1 38661280 38661648 369 38661508 17.00 10.96977 5.86415 8.7	3922 E11.5_MANP_CHIP_HAND2_REP1_REP2_pooled_q0.01_peak_795
c	hr1 38668292 38668643 352 38668495 24.00 17.23311 7.64355 14.	82347 E11.5_MANP_CHIP_HAND2_REP1_REP2_pooled_q0.01_peak_796
c	hr1 38688228 38688618 391 38688436 28.00 22.65424 9.44779 20.	12667 E11.5_MANP_CHIP_HAND2_REP1_REP2_pooled_q0.01_peak_797
c	hr1 38757703 38758390 688 38757926 40.00 28.22105 8.90465 25.	60458 E11.5_MANP_CHIP_HAND2_REP1_REP2_pooled_q0.01_peak_798
c	hr1 38758722 38758990 269 38758851 16.00 10.02746 5.53836 7.8	3127 E11.5_MANP_CHIP_HAND2_REP1_REP2_pooled_q0.01_peak_799
c	hr1 38760212 38760955 744 38760546 170.00 254.22803 54.81910	249.99542 E11.5_MANP_CHIP_HAND2_REP1_REP2_pooled_q0.01_peak_800
c	hr1 38764279 38764892 614 38764565 22.00 15.79026 7.37333 13.	42785 E11.5_MANP_CHIP_HAND2_REP1_REP2_pooled_q0.01_peak_801
c	hr1 38765381 38765819 439 38765606 49.00 49.57059 16.28929 46	.67432 E11.5_MANP_CHIP_HAND2_REP1_REP2_pooled_q0.01_peak_802
c	hr1 38767056 38767528 473 38767218 22.00 14.65357 6.75896 12.	32084 E11.5_MANP_CHIP_HAND2_REP1_REP2_pooled_q0.01_peak_803
c	hr1 38770793 38771021 229 38770905 16.00 10.02746 5.53836 7.8	3127 E11.5_MANP_CHIP_HAND2_REP1_REP2_pooled_q0.01_peak_804
c	hr1 38789941 38790139 199 38790039 14.00 6.53621 3.94387 4.50	495 E11.5_MANP_CHIP_HAND2_REP1_REP2_pooled_q0.01_peak_805
c	hr1 38816197 38816603 407 38816379 27.00 21.50661 9.12200 19.	00221 E11.5_MANP_CHIP_HAND2_REP1_REP2_pooled_q0.01_peak_806
c	hr1 38822986 38823312 327 38823137 25.00 19.25736 8.47043 16.	79900 E11.5_MANP_CHIP_HAND2_REP1_REP2_pooled_q0.01_peak_807
c	hr1 38835815 38836303 489 38836052 16.00 10.02746 5.53836 7.8	3127 E11.5_MANP_CHIP_HAND2_REP1_REP2_pooled_q0.01_peak_808
c	hr1 38888874 38889091 218 38888982 16.00 10.02746 5.53836 7.8	3127 E11.5_MANP_CHIP_HAND2_REP1_REP2_pooled_q0.01_peak_809
c	hr1 38897860 38898404 545 38898182 24.00 18.15687 8.14465 15.	72300 E11.5_MANP_CHIP_HAND2_REP1_REP2_pooled_q0.01_peak_810
c	hr1 38916409 38916623 215 38916511 15.00 9.10962 5.21257 6.94	957 E11.5_MANP_CHIP_HAND2_REP1_REP2_pooled_q0.01_peak_811
c	hr1 38963392 38963580 189 38963489 11.00 5.71447 3.90943 3.73	470 E11.5_MANP_CHIP_HAND2_REP1_REP2_pooled_q0.01_peak_812
c	hr1 38979839 38980187 349 38980027 20.00 13.93124 6.84150 11.	60594 E11.5_MANP_CHIP_HAND2_REP1_REP2_pooled_q0.01_peak_813
c	hr1 38981658 38982145 488 38982002 18.00 11.93525 6.18993 9.6	7149 E11.5_MANP_CHIP_HAND2_REP1_REP2_pooled_q0.01_peak_814
c	hr1 38987484 38987961 478 38987713 29.00 23.81653 9.77358 21.	26746 E11.5_MANP_CHIP_HAND2_REP1_REP2_pooled_q0.01_peak_815
c	hr1 39001212 39001522 311 39001373 37.00 33.59076 12.37986 30	.88588 E11.5_MANP_CHIP_HAND2_REP1_REP2_pooled_q0.01_peak_816
c	hr1 39025148 39025449 302 39025294 25.00 19.25736 8.47043 16.	79900 E11.5_MANP_CHIP_HAND2_REP1_REP2_pooled_q0.01_peak_817
c	hr1 39043341 39043596 256 39043475 16.00 9.06044 4.99575 6.92	684 E11.5_MANP_CHIP_HAND2_REP1_REP2_pooled_q0.01_peak_818
c	hr1 39046632 39047029 398 39046763 15.00 9.10962 5.21257 6.94	957 E11.5_MANP_CHIP_HAND2_REP1_REP2_pooled_q0.01_peak_819
c	hr1 39105580 39105893 314 39105760 19.00 12.92276 6.51572 10.	62788 E11.5_MANP_CHIP_HAND2_REP1_REP2_pooled_q0.01_peak_820
c	hr1 39106032 39106388 357 39106212 31.00 26.18317 10.42515 23	.59259 E11.5_MANP_CHIP_HAND2_REP1_REP2_pooled_q0.01_peak_821
c	hr1 39106588 39106918 331 39106835 16.00 9.06044 4.99575 6.92	684 E11.5_MANP_CHIP_HAND2_REP1_REP2_pooled_q0.01_peak_822
c	hr1 39133996 39134472 477 39134222 82.00 99.26719 27.04023 95	.95659 E11.5_MANP_CHIP_HAND2_REP1_REP2_pooled_q0.01_peak_823
c	hr1 39145392 39145918 527 39145439 11.00 5.71447 3.90943 3.73	470 E11.5_MANP_CHIP_HAND2_REP1_REP2_pooled_q0.01_peak_824a
c	hr1 39145392 39145918 527 39145717 26.00 20.37413 8.79622 17.	89234 E11.5_MANP_CHIP_HAND2_REP1_REP2_pooled_q0.01_peak_824b
c	hr1 39163502 39163917 416 39163720 34.00 25.52776 9.20236 22.	95247 E11.5_MANP_CHIP_HAND2_REP1_REP2_pooled_q0.01_peak_825
c	hr1 39186739 39187015 277 39186867 20.00 12.70653 6.17122 10.	43389 E11.5_MANP_CHIP_HAND2_REP1_REP2_pooled_q0.01_peak_826
c	hr1 39196736 39196943 208 39196830 14.00 8.21768 4.88679 6.09	597 E11.5_MANP_CHIP_HAND2_REP1_REP2_pooled_q0.01_peak_827
c	hr1 39244490 39244917 428 39244713 57.00 60.93423 18.89558 57	.92719 E11.5_MANP_CHIP_HAND2_REP1_REP2_pooled_q0.01_peak_828
c	hr1 39256374 39256742 369 39256570 29.00 23.81653 9.77358 21.	26746 E11.5_MANP_CHIP_HAND2_REP1_REP2_pooled_q0.01_peak_829
c	hr1 39273072 39273431 360 39273256 21.00 14.95972 7.16729 12.	60612 E11.5_MANP_CHIP_HAND2_REP1_REP2_pooled_q0.01_peak_830
c	hr1 39281672 39281895 224 39281800 13.00 7.35325 4.56100 5.27	687 E11.5_MANP_CHIP_HAND2_REP1_REP2_pooled_q0.01_peak_831
c	hr1 39283229 39283540 312 39283397 22.00 16.00735 7.49307 13.	62655 E11.5_MANP_CHIP_HAND2_REP1_REP2_pooled_q0.01_peak_832
c	hr1 39287855 39288301 447 39288071 55.00 58.04611 18.24401 55	.06635 E11.5_MANP_CHIP_HAND2_REP1_REP2_pooled_q0.01_peak_833
c	hr1 39312323 39312908 586 39312510 47.00 46.81241 15.63772 43	.94462 E11.5_MANP_CHIP_HAND2_REP1_REP2_pooled_q0.01_peak_834
c	hr1 39313333 39313625 293 39313478 20.00 13.93124 6.84150 11.	60594 E11.5_MANP_CHIP_HAND2_REP1_REP2_pooled_q0.01_peak_835
c	hr1 39365624 39365951 328 39365732 15.00 9.10962 5.21257 6.94	957 E11.5_MANP_CHIP_HAND2_REP1_REP2_pooled_q0.01_peak_836
c	hr1 39382927 39383257 331 39383100 20.00 13.93124 6.84150 11.	60594 E11.5_MANP_CHIP_HAND2_REP1_REP2_pooled_q0.01_peak_837
c	hr1 39417975 39418304 330 39418126 24.00 15.16679 6.57311 12.	81060 E11.5_MANP_CHIP_HAND2_REP1_REP2_pooled_q0.01_peak_838
c	hr1 39424737 39425254 518 39424983 27.00 16.66609 6.66055 14.	28029 E11.5_MANP_CHIP_HAND2_REP1_REP2_pooled_q0.01_peak_839
c	hr1 39434038 39434412 375 39434227 49.00 49.57059 16.28929 46	.67432 E11.5_MANP_CHIP_HAND2_REP1_REP2_pooled_q0.01_peak_840
c	hr1 39443765 39444156 392 39443949 45.00 38.33806 12.09452 35	.57628 E11.5_MANP_CHIP_HAND2_REP1_REP2_pooled_q0.01_peak_841
c	hr1 39450136 39450445 310 39450287 33.00 22.62713 8.08781 20.	11376 E11.5_MANP_CHIP_HAND2_REP1_REP2_pooled_q0.01_peak_842
c	hr1 39455382 39455858 477 39455660 61.00 62.91905 18.21980 59	.89685 E11.5_MANP_CHIP_HAND2_REP1_REP2_pooled_q0.01_peak_843
c	hr1 39463995 39465193 1199 39464211 65.00 68.63511 19.39527 6	5.56114 E11.5_MANP_CHIP_HAND2_REP1_REP2_pooled_q0.01_peak_844a
c	hr1 39463995 39465193 1199 39464611 23.00 14.21446 6.31019 11	.88655 E11.5_MANP_CHIP_HAND2_REP1_REP2_pooled_q0.01_peak_844b
c	hr1 39463995 39465193 1199 39465002 40.00 37.45079 13.35722 3	4.69261 E11.5_MANP_CHIP_HAND2_REP1_REP2_pooled_q0.01_peak_844c
c	hr1 39477989 39478272 284 39478146 14.00 8.21768 4.88679 6.09	597 E11.5_MANP_CHIP_HAND2_REP1_REP2_pooled_q0.01_peak_845
c	hr1 39478524 39479042 519 39478754 19.00 12.92276 6.51572 10.	62788 E11.5_MANP_CHIP_HAND2_REP1_REP2_pooled_q0.01_peak_846
c	hr1 39509904 39510157 254 39510027 23.00 14.21446 6.31019 11.	88655 E11.5_MANP_CHIP_HAND2_REP1_REP2_pooled_q0.01_peak_847
c	hr1 39511711 39512020 310 39511843 27.00 20.84295 8.76358 18.	35866 E11.5_MANP_CHIP_HAND2_REP1_REP2_pooled_q0.01_peak_848
c	hr1 39515465 39516005 541 39515717 67.00 71.53269 19.98300 68	.43355 E11.5_MANP_CHIP_HAND2_REP1_REP2_pooled_q0.01_peak_849
c	hr1 39535577 39536221 645 39535725 17.00 10.96977 5.86415 8.7	3922 E11.5_MANP_CHIP_HAND2_REP1_REP2_pooled_q0.01_peak_850a
c	hr1 39535577 39536221 645 39536063 28.00 20.91265 8.52216 18.	42583 E11.5_MANP_CHIP_HAND2_REP1_REP2_pooled_q0.01_peak_850b
c	hr1 39555602 39556212 611 39555941 123.00 168.90204 40.39745	165.15868 E11.5_MANP_CHIP_HAND2_REP1_REP2_pooled_q0.01_peak_851
c	hr1 39564626 39564968 343 39564790 28.00 22.65424 9.44779 20.	12667 E11.5_MANP_CHIP_HAND2_REP1_REP2_pooled_q0.01_peak_852
c	hr1 39577204 39577761 558 39577512 30.00 23.12201 9.10990 20.	59036 E11.5_MANP_CHIP_HAND2_REP1_REP2_pooled_q0.01_peak_853
c	hr1 39606632 39607001 370 39606805 32.00 27.38667 10.75093 24	.77647 E11.5_MANP_CHIP_HAND2_REP1_REP2_pooled_q0.01_peak_854
c	hr1 39613998 39614868 871 39614412 60.00 65.32172 19.87294 62	.27599 E11.5_MANP_CHIP_HAND2_REP1_REP2_pooled_q0.01_peak_855
c	hr1 39670314 39670599 286 39670498 13.00 7.04555 4.38179 5.00	563 E11.5_MANP_CHIP_HAND2_REP1_REP2_pooled_q0.01_peak_856
c	hr1 39688621 39688950 330 39688803 34.00 29.83204 11.40250 27	.18352 E11.5_MANP_CHIP_HAND2_REP1_REP2_pooled_q0.01_peak_857
c	hr1 39700691 39700932 242 39700836 15.00 9.10962 5.21257 6.94	957 E11.5_MANP_CHIP_HAND2_REP1_REP2_pooled_q0.01_peak_858
c	hr1 39702719 39703284 566 39703070 71.00 81.93095 23.45658 78	.74734 E11.5_MANP_CHIP_HAND2_REP1_REP2_pooled_q0.01_peak_859
c	hr1 39717648 39717924 277 39717797 25.00 19.00938 8.33507 16.	56916 E11.5_MANP_CHIP_HAND2_REP1_REP2_pooled_q0.01_peak_860
c	hr1 39740401 39740679 279 39740538 31.00 26.18317 10.42515 23	.59259 E11.5_MANP_CHIP_HAND2_REP1_REP2_pooled_q0.01_peak_861
c	hr1 39746820 39747090 271 39746954 28.00 22.65424 9.44779 20.	12667 E11.5_MANP_CHIP_HAND2_REP1_REP2_pooled_q0.01_peak_862
c	hr1 39767882 39768254 373 39768111 13.00 7.35325 4.56100 5.27	687 E11.5_MANP_CHIP_HAND2_REP1_REP2_pooled_q0.01_peak_863
c	hr1 39772044 39772315 272 39772176 28.00 22.65424 9.44779 20.	12667 E11.5_MANP_CHIP_HAND2_REP1_REP2_pooled_q0.01_peak_864
c	hr1 39821659 39821970 312 39821833 19.00 8.73400 4.34373 6.60	991 E11.5_MANP_CHIP_HAND2_REP1_REP2_pooled_q0.01_peak_865
c	hr1 39830809 39831279 471 39831027 33.00 28.60308 11.07672 25	.97338 E11.5_MANP_CHIP_HAND2_REP1_REP2_pooled_q0.01_peak_866
c	hr1 39831422 39831631 210 39831529 12.00 6.51816 4.23522 4.49	107 E11.5_MANP_CHIP_HAND2_REP1_REP2_pooled_q0.01_peak_867
c	hr1 39859115 39859446 332 39859290 28.00 22.65424 9.44779 20.	12667 E11.5_MANP_CHIP_HAND2_REP1_REP2_pooled_q0.01_peak_868
c	hr1 39867938 39869315 1378 39868404 104.00 135.75829 34.20752	132.20880 E11.5_MANP_CHIP_HAND2_REP1_REP2_pooled_q0.01_peak_869a
c	hr1 39867938 39869315 1378 39868944 36.00 32.32619 12.05408 2	9.64147 E11.5_MANP_CHIP_HAND2_REP1_REP2_pooled_q0.01_peak_869b
c	hr1 39869572 39870136 565 39869813 14.00 7.88469 4.69477 5.80	151 E11.5_MANP_CHIP_HAND2_REP1_REP2_pooled_q0.01_peak_870
c	hr1 39878144 39878659 516 39878434 28.00 19.13882 7.62481 16.	69617 E11.5_MANP_CHIP_HAND2_REP1_REP2_pooled_q0.01_peak_871
c	hr1 39901073 39901261 189 39901165 9.00 4.21116 3.25786 2.340	25 E11.5_MANP_CHIP_HAND2_REP1_REP2_pooled_q0.01_peak_872
c	hr1 39921433 39921719 287 39921517 11.00 5.71447 3.90943 3.73	470 E11.5_MANP_CHIP_HAND2_REP1_REP2_pooled_q0.01_peak_873
c	hr1 39936472 39936709 238 39936592 15.00 9.10962 5.21257 6.94	957 E11.5_MANP_CHIP_HAND2_REP1_REP2_pooled_q0.01_peak_874
c	hr1 39937477 39937802 326 39937624 21.00 14.95972 7.16729 12.	60612 E11.5_MANP_CHIP_HAND2_REP1_REP2_pooled_q0.01_peak_875
c	hr1 39942763 39942955 193 39942883 13.00 6.57881 4.11415 4.54	160 E11.5_MANP_CHIP_HAND2_REP1_REP2_pooled_q0.01_peak_876
c	hr1 39947811 39948128 318 39947958 17.00 10.96977 5.86415 8.7	3922 E11.5_MANP_CHIP_HAND2_REP1_REP2_pooled_q0.01_peak_877
c	hr1 39952730 39953156 427 39952938 18.00 11.93525 6.18993 9.6	7149 E11.5_MANP_CHIP_HAND2_REP1_REP2_pooled_q0.01_peak_878
c	hr1 39954202 39954439 238 39954335 19.00 12.92276 6.51572 10.	62788 E11.5_MANP_CHIP_HAND2_REP1_REP2_pooled_q0.01_peak_879
c	hr1 40028973 40029194 222 40029071 18.00 10.83949 5.58349 8.6	3233 E11.5_MANP_CHIP_HAND2_REP1_REP2_pooled_q0.01_peak_880
c	hr1 40042100 40042288 189 40042189 14.00 8.21768 4.88679 6.09	597 E11.5_MANP_CHIP_HAND2_REP1_REP2_pooled_q0.01_peak_881
c	hr1 40053095 40053381 287 40053263 19.00 12.92276 6.51572 10.	62788 E11.5_MANP_CHIP_HAND2_REP1_REP2_pooled_q0.01_peak_882
c	hr1 40090155 40090521 367 40090310 24.00 18.15687 8.14465 15.	72300 E11.5_MANP_CHIP_HAND2_REP1_REP2_pooled_q0.01_peak_883
c	hr1 40106715 40107176 462 40107057 19.00 12.46288 6.25970 10.	19417 E11.5_MANP_CHIP_HAND2_REP1_REP2_pooled_q0.01_peak_884
c	hr1 40112629 40112817 189 40112683 11.00 5.71447 3.90943 3.73	470 E11.5_MANP_CHIP_HAND2_REP1_REP2_pooled_q0.01_peak_885
c	hr1 40139842 40140294 453 40140163 17.00 10.96977 5.86415 8.7	3922 E11.5_MANP_CHIP_HAND2_REP1_REP2_pooled_q0.01_peak_886
c	hr1 40179471 40179758 288 40179622 15.00 9.10962 5.21257 6.94	957 E11.5_MANP_CHIP_HAND2_REP1_REP2_pooled_q0.01_peak_887
c	hr1 40189900 40190276 377 40190090 58.00 62.38948 19.22136 59	.36964 E11.5_MANP_CHIP_HAND2_REP1_REP2_pooled_q0.01_peak_888
c	hr1 40193771 40193959 189 40193861 15.00 9.10962 5.21257 6.94	957 E11.5_MANP_CHIP_HAND2_REP1_REP2_pooled_q0.01_peak_889
c	hr1 40224727 40225374 648 40225235 19.00 10.58822 5.25849 8.3	8578 E11.5_MANP_CHIP_HAND2_REP1_REP2_pooled_q0.01_peak_890
c	hr1 40233321 40233810 490 40233523 46.00 45.44663 15.31194 42	.59351 E11.5_MANP_CHIP_HAND2_REP1_REP2_pooled_q0.01_peak_891
c	hr1 40233996 40234184 189 40234081 14.00 8.21768 4.88679 6.09	597 E11.5_MANP_CHIP_HAND2_REP1_REP2_pooled_q0.01_peak_892
c	hr1 40236635 40237130 496 40236937 23.00 17.07331 7.81886 14.	66632 E11.5_MANP_CHIP_HAND2_REP1_REP2_pooled_q0.01_peak_893
c	hr1 40243607 40244076 470 40243860 49.00 49.57059 16.28929 46	.67432 E11.5_MANP_CHIP_HAND2_REP1_REP2_pooled_q0.01_peak_894
c	hr1 40258544 40258840 297 40258683 18.00 11.93525 6.18993 9.6	7149 E11.5_MANP_CHIP_HAND2_REP1_REP2_pooled_q0.01_peak_895
c	hr1 40259923 40260175 253 40260053 17.00 10.96977 5.86415 8.7	3922 E11.5_MANP_CHIP_HAND2_REP1_REP2_pooled_q0.01_peak_896
c	hr1 40263724 40263969 246 40263865 18.00 11.93525 6.18993 9.6	7149 E11.5_MANP_CHIP_HAND2_REP1_REP2_pooled_q0.01_peak_897
c	hr1 40296200 40296472 273 40296321 28.00 21.56980 8.86651 19.	06468 E11.5_MANP_CHIP_HAND2_REP1_REP2_pooled_q0.01_peak_898
c	hr1 40314307 40314659 353 40314476 32.00 27.38667 10.75093 24	.77647 E11.5_MANP_CHIP_HAND2_REP1_REP2_pooled_q0.01_peak_899
c	hr1 40320040 40320571 532 40320355 51.00 45.82114 13.67207 42	.96609 E11.5_MANP_CHIP_HAND2_REP1_REP2_pooled_q0.01_peak_900
c	hr1 40330965 40331480 516 40331212 52.00 53.77185 17.26665 50	.83202 E11.5_MANP_CHIP_HAND2_REP1_REP2_pooled_q0.01_peak_901
c	hr1 40352917 40353140 224 40353017 11.00 5.71447 3.90943 3.73	470 E11.5_MANP_CHIP_HAND2_REP1_REP2_pooled_q0.01_peak_902
c	hr1 40355529 40356202 674 40355880 74.00 86.59146 24.43394 83	.37283 E11.5_MANP_CHIP_HAND2_REP1_REP2_pooled_q0.01_peak_903
c	hr1 40357896 40358287 392 40358137 13.00 7.35325 4.56100 5.27	687 E11.5_MANP_CHIP_HAND2_REP1_REP2_pooled_q0.01_peak_904
c	hr1 40360838 40361026 189 40360924 14.00 8.21768 4.88679 6.09	597 E11.5_MANP_CHIP_HAND2_REP1_REP2_pooled_q0.01_peak_905
c	hr1 40376831 40377051 221 40376954 14.00 8.21768 4.88679 6.09	597 E11.5_MANP_CHIP_HAND2_REP1_REP2_pooled_q0.01_peak_906
c	hr1 40425507 40425848 342 40425646 26.00 20.37413 8.79622 17.	89234 E11.5_MANP_CHIP_HAND2_REP1_REP2_pooled_q0.01_peak_907
c	hr1 40435877 40436270 394 40436063 39.00 31.19119 10.51698 28	.52269 E11.5_MANP_CHIP_HAND2_REP1_REP2_pooled_q0.01_peak_908
c	hr1 40475692 40476039 348 40475852 26.00 20.37413 8.79622 17.	89234 E11.5_MANP_CHIP_HAND2_REP1_REP2_pooled_q0.01_peak_909
c	hr1 40490721 40491136 416 40490918 29.00 22.01025 8.81603 19.	50099 E11.5_MANP_CHIP_HAND2_REP1_REP2_pooled_q0.01_peak_910
c	hr1 40491223 40491474 252 40491371 13.00 7.35325 4.56100 5.27	687 E11.5_MANP_CHIP_HAND2_REP1_REP2_pooled_q0.01_peak_911
c	hr1 40547229 40547605 377 40547410 30.00 24.99298 10.09936 22	.42290 E11.5_MANP_CHIP_HAND2_REP1_REP2_pooled_q0.01_peak_912
c	hr1 40547976 40548562 587 40548340 84.00 91.60000 22.34858 88	.34431 E11.5_MANP_CHIP_HAND2_REP1_REP2_pooled_q0.01_peak_913
c	hr1 40583127 40583387 261 40583267 24.00 18.15687 8.14465 15.	72300 E11.5_MANP_CHIP_HAND2_REP1_REP2_pooled_q0.01_peak_914
c	hr1 40601049 40601379 331 40601236 29.00 23.81653 9.77358 21.	26746 E11.5_MANP_CHIP_HAND2_REP1_REP2_pooled_q0.01_peak_915
c	hr1 40629399 40629766 368 40629538 21.00 14.95972 7.16729 12.	60612 E11.5_MANP_CHIP_HAND2_REP1_REP2_pooled_q0.01_peak_916
c	hr1 40631242 40631470 229 40631357 16.00 10.02746 5.53836 7.8	3127 E11.5_MANP_CHIP_HAND2_REP1_REP2_pooled_q0.01_peak_917
c	hr1 40631774 40632095 322 40631950 17.00 10.96977 5.86415 8.7	3922 E11.5_MANP_CHIP_HAND2_REP1_REP2_pooled_q0.01_peak_918
c	hr1 40681779 40681997 219 40681877 14.00 5.82729 3.56815 3.83	747 E11.5_MANP_CHIP_HAND2_REP1_REP2_pooled_q0.01_peak_919
c	hr1 40717702 40718054 353 40717886 32.00 27.38667 10.75093 24	.77647 E11.5_MANP_CHIP_HAND2_REP1_REP2_pooled_q0.01_peak_920
c	hr1 40775955 40776344 390 40776129 33.00 28.60308 11.07672 25	.97338 E11.5_MANP_CHIP_HAND2_REP1_REP2_pooled_q0.01_peak_921
c	hr1 40824849 40825346 498 40825006 38.00 30.03602 10.25405 27	.38576 E11.5_MANP_CHIP_HAND2_REP1_REP2_pooled_q0.01_peak_922
c	hr1 40844647 40844835 189 40844752 14.00 8.21768 4.88679 6.09	597 E11.5_MANP_CHIP_HAND2_REP1_REP2_pooled_q0.01_peak_923
c	hr1 40867608 40867884 277 40867722 13.00 7.35325 4.56100 5.27	687 E11.5_MANP_CHIP_HAND2_REP1_REP2_pooled_q0.01_peak_924
c	hr1 40870272 40870494 223 40870394 21.00 14.75292 7.05275 12.	41942 E11.5_MANP_CHIP_HAND2_REP1_REP2_pooled_q0.01_peak_925
c	hr1 40890414 40890876 463 40890575 13.00 7.35325 4.56100 5.27	687 E11.5_MANP_CHIP_HAND2_REP1_REP2_pooled_q0.01_peak_926
c	hr1 40924522 40924999 478 40924855 26.00 17.12145 7.09896 14.	71266 E11.5_MANP_CHIP_HAND2_REP1_REP2_pooled_q0.01_peak_927
c	hr1 40931561 40931751 191 40931645 17.00 8.89687 4.73264 6.76	843 E11.5_MANP_CHIP_HAND2_REP1_REP2_pooled_q0.01_peak_928
c	hr1 40972141 40972432 292 40972257 14.00 8.21768 4.88679 6.09	597 E11.5_MANP_CHIP_HAND2_REP1_REP2_pooled_q0.01_peak_929
c	hr1 41006907 41007653 747 41007353 85.00 104.10816 28.01758 1	00.76418 E11.5_MANP_CHIP_HAND2_REP1_REP2_pooled_q0.01_peak_930
c	hr1 41014378 41014741 364 41014488 18.00 10.83949 5.58349 8.6	3233 E11.5_MANP_CHIP_HAND2_REP1_REP2_pooled_q0.01_peak_931a
c	hr1 41014378 41014741 364 41014675 11.00 4.42234 3.15509 2.54	071 E11.5_MANP_CHIP_HAND2_REP1_REP2_pooled_q0.01_peak_931b
c	hr1 41032571 41032816 246 41032667 10.00 4.94456 3.58364 3.01	655 E11.5_MANP_CHIP_HAND2_REP1_REP2_pooled_q0.01_peak_932
c	hr1 41034651 41034975 325 41034748 13.00 7.35325 4.56100 5.27	687 E11.5_MANP_CHIP_HAND2_REP1_REP2_pooled_q0.01_peak_933
c	hr1 41035209 41035647 439 41035375 29.00 23.81653 9.77358 21.	26746 E11.5_MANP_CHIP_HAND2_REP1_REP2_pooled_q0.01_peak_934
c	hr1 41085774 41086332 559 41086069 68.00 58.36878 13.78671 55	.38755 E11.5_MANP_CHIP_HAND2_REP1_REP2_pooled_q0.01_peak_935
c	hr1 41114985 41115304 320 41115136 36.00 30.06681 10.87310 27	.41436 E11.5_MANP_CHIP_HAND2_REP1_REP2_pooled_q0.01_peak_936
c	hr1 41122304 41122521 218 41122428 13.00 7.35325 4.56100 5.27	687 E11.5_MANP_CHIP_HAND2_REP1_REP2_pooled_q0.01_peak_937
c	hr1 41128049 41128538 490 41128347 35.00 28.87856 10.57924 26	.24641 E11.5_MANP_CHIP_HAND2_REP1_REP2_pooled_q0.01_peak_938
c	hr1 41154356 41154684 329 41154530 32.00 27.38667 10.75093 24	.77647 E11.5_MANP_CHIP_HAND2_REP1_REP2_pooled_q0.01_peak_939
c	hr1 41158340 41158538 199 41158428 12.00 6.51816 4.23522 4.49	107 E11.5_MANP_CHIP_HAND2_REP1_REP2_pooled_q0.01_peak_940
c	hr1 41219007 41219270 264 41219142 15.00 9.10962 5.21257 6.94	957 E11.5_MANP_CHIP_HAND2_REP1_REP2_pooled_q0.01_peak_941
c	hr1 41264372 41264660 289 41264512 23.00 17.07331 7.81886 14.	66632 E11.5_MANP_CHIP_HAND2_REP1_REP2_pooled_q0.01_peak_942
c	hr1 41272058 41272332 275 41272200 27.00 21.50661 9.12200 19.	00221 E11.5_MANP_CHIP_HAND2_REP1_REP2_pooled_q0.01_peak_943
c	hr1 41272683 41273028 346 41272933 11.00 5.71447 3.90943 3.73	470 E11.5_MANP_CHIP_HAND2_REP1_REP2_pooled_q0.01_peak_944
c	hr1 41357123 41357335 213 41357231 13.00 6.57881 4.11415 4.54	160 E11.5_MANP_CHIP_HAND2_REP1_REP2_pooled_q0.01_peak_945
c	hr1 41390108 41390538 431 41390330 37.00 28.89180 9.99113 26.	25820 E11.5_MANP_CHIP_HAND2_REP1_REP2_pooled_q0.01_peak_946
c	hr1 41484089 41484277 189 41484176 16.00 7.26194 4.04391 5.21	887 E11.5_MANP_CHIP_HAND2_REP1_REP2_pooled_q0.01_peak_947
c	hr1 41568355 41568626 272 41568525 15.00 9.10962 5.21257 6.94	957 E11.5_MANP_CHIP_HAND2_REP1_REP2_pooled_q0.01_peak_948
c	hr1 41579773 41580173 401 41579929 37.00 33.59076 12.37986 30	.88588 E11.5_MANP_CHIP_HAND2_REP1_REP2_pooled_q0.01_peak_949
c	hr1 41608951 41609265 315 41609135 21.00 14.95972 7.16729 12.	60612 E11.5_MANP_CHIP_HAND2_REP1_REP2_pooled_q0.01_peak_950
c	hr1 41610999 41611219 221 41611111 18.00 11.93525 6.18993 9.6	7149 E11.5_MANP_CHIP_HAND2_REP1_REP2_pooled_q0.01_peak_951
c	hr1 41652415 41653147 733 41652869 131.00 152.10095 28.66862	148.45676 E11.5_MANP_CHIP_HAND2_REP1_REP2_pooled_q0.01_peak_952
c	hr1 41743008 41743394 387 41743194 37.00 25.08249 8.25309 22.	51199 E11.5_MANP_CHIP_HAND2_REP1_REP2_pooled_q0.01_peak_953
c	hr1 41764862 41765053 192 41764964 15.00 9.10962 5.21257 6.94	957 E11.5_MANP_CHIP_HAND2_REP1_REP2_pooled_q0.01_peak_954
c	hr1 41821181 41821429 249 41821305 26.00 20.37413 8.79622 17.	89234 E11.5_MANP_CHIP_HAND2_REP1_REP2_pooled_q0.01_peak_955
c	hr1 41885767 41885966 200 41885864 11.00 5.45721 3.75582 3.51	478 E11.5_MANP_CHIP_HAND2_REP1_REP2_pooled_q0.01_peak_956
c	hr1 41890572 41890815 244 41890643 11.00 5.71447 3.90943 3.73	470 E11.5_MANP_CHIP_HAND2_REP1_REP2_pooled_q0.01_peak_957
c	hr1 41892400 41892877 478 41892633 40.00 37.45079 13.35722 34	.69261 E11.5_MANP_CHIP_HAND2_REP1_REP2_pooled_q0.01_peak_958
c	hr1 41896026 41896262 237 41896142 13.00 7.35325 4.56100 5.27	687 E11.5_MANP_CHIP_HAND2_REP1_REP2_pooled_q0.01_peak_959
c	hr1 41896402 41897024 623 41896700 36.00 32.32619 12.05408 29	.64147 E11.5_MANP_CHIP_HAND2_REP1_REP2_pooled_q0.01_peak_960
c	hr1 41913958 41914146 189 41914050 12.00 6.51816 4.23522 4.49	107 E11.5_MANP_CHIP_HAND2_REP1_REP2_pooled_q0.01_peak_961
c	hr1 41918360 41919141 782 41918715 28.00 22.65424 9.44779 20.	12667 E11.5_MANP_CHIP_HAND2_REP1_REP2_pooled_q0.01_peak_962a
c	hr1 41918360 41919141 782 41919033 16.00 10.02746 5.53836 7.8	3127 E11.5_MANP_CHIP_HAND2_REP1_REP2_pooled_q0.01_peak_962b
c	hr1 42026479 42026695 217 42026603 16.00 8.08520 4.46972 5.99	627 E11.5_MANP_CHIP_HAND2_REP1_REP2_pooled_q0.01_peak_963
c	hr1 42163775 42163963 189 42163849 12.00 6.51816 4.23522 4.49	107 E11.5_MANP_CHIP_HAND2_REP1_REP2_pooled_q0.01_peak_964
c	hr1 42205263 42205531 269 42205391 29.00 23.81653 9.77358 21.	26746 E11.5_MANP_CHIP_HAND2_REP1_REP2_pooled_q0.01_peak_965
c	hr1 42207705 42208020 316 42207840 18.00 11.93525 6.18993 9.6	7149 E11.5_MANP_CHIP_HAND2_REP1_REP2_pooled_q0.01_peak_966
c	hr1 42208958 42209446 489 42209152 46.00 42.53944 13.81178 39	.72720 E11.5_MANP_CHIP_HAND2_REP1_REP2_pooled_q0.01_peak_967
c	hr1 42215130 42215905 776 42215547 186.00 251.97949 44.48297	247.76044 E11.5_MANP_CHIP_HAND2_REP1_REP2_pooled_q0.01_peak_968
c	hr1 42216828 42217168 341 42216977 23.00 17.07331 7.81886 14.	66632 E11.5_MANP_CHIP_HAND2_REP1_REP2_pooled_q0.01_peak_969
c	hr1 42231118 42231450 333 42231285 29.00 23.81653 9.77358 21.	26746 E11.5_MANP_CHIP_HAND2_REP1_REP2_pooled_q0.01_peak_970
c	hr1 42231999 42232400 402 42232202 30.00 21.21470 8.15066 18.	72540 E11.5_MANP_CHIP_HAND2_REP1_REP2_pooled_q0.01_peak_971
c	hr1 42233124 42233702 579 42233416 104.00 122.23331 27.60707	118.76977 E11.5_MANP_CHIP_HAND2_REP1_REP2_pooled_q0.01_peak_972
c	hr1 42234037 42234439 403 42234283 30.00 24.25280 9.70253 21.	69985 E11.5_MANP_CHIP_HAND2_REP1_REP2_pooled_q0.01_peak_973
c	hr1 42241379 42241575 197 42241473 13.00 6.57881 4.11415 4.54	160 E11.5_MANP_CHIP_HAND2_REP1_REP2_pooled_q0.01_peak_974
c	hr1 42257899 42258087 189 42258012 13.00 7.35325 4.56100 5.27	687 E11.5_MANP_CHIP_HAND2_REP1_REP2_pooled_q0.01_peak_975
c	hr1 42261648 42262195 548 42261950 58.00 58.70452 17.33819 55	.72115 E11.5_MANP_CHIP_HAND2_REP1_REP2_pooled_q0.01_peak_976
c	hr1 42295311 42296153 843 42295514 46.00 32.79278 9.39095 30.	10238 E11.5_MANP_CHIP_HAND2_REP1_REP2_pooled_q0.01_peak_977a
c	hr1 42295311 42296153 843 42295985 39.00 31.19119 10.51698 28	.52269 E11.5_MANP_CHIP_HAND2_REP1_REP2_pooled_q0.01_peak_977b
c	hr1 42309985 42310189 205 42310077 12.00 6.51816 4.23522 4.49	107 E11.5_MANP_CHIP_HAND2_REP1_REP2_pooled_q0.01_peak_978
c	hr1 42387882 42388126 245 42387977 11.00 5.71447 3.90943 3.73	470 E11.5_MANP_CHIP_HAND2_REP1_REP2_pooled_q0.01_peak_979
c	hr1 42436375 42436860 486 42436556 35.00 26.63737 9.46528 24.	04214 E11.5_MANP_CHIP_HAND2_REP1_REP2_pooled_q0.01_peak_980
c	hr1 42476487 42476899 413 42476666 39.00 36.15333 13.03143 33	.41379 E11.5_MANP_CHIP_HAND2_REP1_REP2_pooled_q0.01_peak_981
c	hr1 42557045 42557312 268 42557164 16.00 10.02746 5.53836 7.8	3127 E11.5_MANP_CHIP_HAND2_REP1_REP2_pooled_q0.01_peak_982
c	hr1 42579586 42579844 259 42579718 21.00 12.36316 5.78434 10.	09529 E11.5_MANP_CHIP_HAND2_REP1_REP2_pooled_q0.01_peak_983
c	hr1 42590243 42590490 248 42590358 16.00 9.06044 4.99575 6.92	684 E11.5_MANP_CHIP_HAND2_REP1_REP2_pooled_q0.01_peak_984
c	hr1 42605225 42605562 338 42605417 22.00 16.00735 7.49307 13.	62655 E11.5_MANP_CHIP_HAND2_REP1_REP2_pooled_q0.01_peak_985
c	hr1 42617447 42617842 396 42617682 32.00 25.28014 9.64316 22.	70923 E11.5_MANP_CHIP_HAND2_REP1_REP2_pooled_q0.01_peak_986
c	hr1 42629704 42630168 465 42630006 18.00 7.27948 3.79634 5.23	613 E11.5_MANP_CHIP_HAND2_REP1_REP2_pooled_q0.01_peak_987
c	hr1 42633665 42633867 203 42633762 13.00 7.35325 4.56100 5.27	687 E11.5_MANP_CHIP_HAND2_REP1_REP2_pooled_q0.01_peak_988
c	hr1 42649325 42649862 538 42649621 47.00 43.84041 14.10565 41	.01270 E11.5_MANP_CHIP_HAND2_REP1_REP2_pooled_q0.01_peak_989
c	hr1 42673332 42673704 373 42673550 12.00 6.51816 4.23522 4.49	107 E11.5_MANP_CHIP_HAND2_REP1_REP2_pooled_q0.01_peak_990
c	hr1 42771947 42772513 567 42772275 30.00 23.12201 9.10990 20.	59036 E11.5_MANP_CHIP_HAND2_REP1_REP2_pooled_q0.01_peak_991
c	hr1 42815394 42815582 189 42815494 12.00 6.51816 4.23522 4.49	107 E11.5_MANP_CHIP_HAND2_REP1_REP2_pooled_q0.01_peak_992
c	hr1 42823633 42823993 361 42823828 50.00 50.96264 16.61508 48	.05222 E11.5_MANP_CHIP_HAND2_REP1_REP2_pooled_q0.01_peak_993
c	hr1 42851085 42851374 290 42851216 18.00 11.93525 6.18993 9.6	7149 E11.5_MANP_CHIP_HAND2_REP1_REP2_pooled_q0.01_peak_994
c	hr1 42893503 42893829 327 42893693 25.00 19.25736 8.47043 16.	79900 E11.5_MANP_CHIP_HAND2_REP1_REP2_pooled_q0.01_peak_995
c	hr1 42920246 42920434 189 42920389 13.00 7.35325 4.56100 5.27	687 E11.5_MANP_CHIP_HAND2_REP1_REP2_pooled_q0.01_peak_996
c	hr1 42952893 42953220 328 42953051 20.00 13.93124 6.84150 11.	60594 E11.5_MANP_CHIP_HAND2_REP1_REP2_pooled_q0.01_peak_997
c	hr1 42954031 42954619 589 42954290 87.00 107.36068 28.66916 1	03.99434 E11.5_MANP_CHIP_HAND2_REP1_REP2_pooled_q0.01_peak_998
c	hr1 43005501 43005794 294 43005627 16.00 10.02746 5.53836 7.8	3127 E11.5_MANP_CHIP_HAND2_REP1_REP2_pooled_q0.01_peak_999
c	hr1 43006135 43006350 216 43006247 16.00 10.02746 5.53836 7.8	3127 E11.5_MANP_CHIP_HAND2_REP1_REP2_pooled_q0.01_peak_1000
c	hr1 43010291 43010952 662 43010649 94.00 118.89616 30.94966 1	15.45497 E11.5_MANP_CHIP_HAND2_REP1_REP2_pooled_q0.01_peak_1001
c	hr1 43019711 43020386 676 43020042 204.00 264.63547 40.96051	260.34058 E11.5_MANP_CHIP_HAND2_REP1_REP2_pooled_q0.01_peak_1002
c	hr1 43024620 43025124 505 43024889 58.00 48.82778 12.81400 45	.94287 E11.5_MANP_CHIP_HAND2_REP1_REP2_pooled_q0.01_peak_1003
c	hr1 43030467 43030801 335 43030610 16.00 9.64378 5.32074 7.47	975 E11.5_MANP_CHIP_HAND2_REP1_REP2_pooled_q0.01_peak_1004
c	hr1 43037668 43038331 664 43037962 78.00 82.78683 20.77103 79	.59962 E11.5_MANP_CHIP_HAND2_REP1_REP2_pooled_q0.01_peak_1005
c	hr1 43038667 43038970 304 43038803 24.00 18.15687 8.14465 15.	72300 E11.5_MANP_CHIP_HAND2_REP1_REP2_pooled_q0.01_peak_1006
c	hr1 43042313 43042628 316 43042492 20.00 13.93124 6.84150 11.	60594 E11.5_MANP_CHIP_HAND2_REP1_REP2_pooled_q0.01_peak_1007
c	hr1 43054492 43055569 1078 43054763 19.00 12.92276 6.51572 10	.62788 E11.5_MANP_CHIP_HAND2_REP1_REP2_pooled_q0.01_peak_1008a
c	hr1 43054492 43055569 1078 43055331 82.00 79.92588 18.02648 7	6.76225 E11.5_MANP_CHIP_HAND2_REP1_REP2_pooled_q0.01_peak_1008b
c	hr1 43079558 43080286 729 43079740 28.00 22.65424 9.44779 20.	12667 E11.5_MANP_CHIP_HAND2_REP1_REP2_pooled_q0.01_peak_1009a
c	hr1 43079558 43080286 729 43080124 22.00 16.00735 7.49307 13.	62655 E11.5_MANP_CHIP_HAND2_REP1_REP2_pooled_q0.01_peak_1009b
c	hr1 43092265 43092453 189 43092347 12.00 5.80770 3.82028 3.81	936 E11.5_MANP_CHIP_HAND2_REP1_REP2_pooled_q0.01_peak_1010
c	hr1 43098546 43098866 321 43098744 16.00 10.02746 5.53836 7.8	3127 E11.5_MANP_CHIP_HAND2_REP1_REP2_pooled_q0.01_peak_1011
c	hr1 43131432 43131638 207 43131537 15.00 9.10962 5.21257 6.94	957 E11.5_MANP_CHIP_HAND2_REP1_REP2_pooled_q0.01_peak_1012
c	hr1 43136451 43136926 476 43136690 36.00 27.75882 9.72820 25.	14443 E11.5_MANP_CHIP_HAND2_REP1_REP2_pooled_q0.01_peak_1013
c	hr1 43163800 43164165 366 43164031 16.00 10.02746 5.53836 7.8	3127 E11.5_MANP_CHIP_HAND2_REP1_REP2_pooled_q0.01_peak_1014
c	hr1 43191296 43191988 693 43191619 31.00 24.24748 9.40377 21.	69489 E11.5_MANP_CHIP_HAND2_REP1_REP2_pooled_q0.01_peak_1015
c	hr1 43196134 43196529 396 43196206 11.00 5.71447 3.90943 3.73	470 E11.5_MANP_CHIP_HAND2_REP1_REP2_pooled_q0.01_peak_1016
c	hr1 43203229 43203859 631 43203564 141.00 201.47006 46.26159	197.53879 E11.5_MANP_CHIP_HAND2_REP1_REP2_pooled_q0.01_peak_1017
c	hr1 43205473 43205790 318 43205614 25.00 19.25736 8.47043 16.	79900 E11.5_MANP_CHIP_HAND2_REP1_REP2_pooled_q0.01_peak_1018
c	hr1 43215574 43216211 638 43215857 63.00 66.40046 19.12489 63	.34964 E11.5_MANP_CHIP_HAND2_REP1_REP2_pooled_q0.01_peak_1019
c	hr1 43224246 43224601 356 43224436 31.00 26.18317 10.42515 23	.59259 E11.5_MANP_CHIP_HAND2_REP1_REP2_pooled_q0.01_peak_1020
c	hr1 43225362 43226196 835 43225941 100.00 122.55336 29.68064	119.08684 E11.5_MANP_CHIP_HAND2_REP1_REP2_pooled_q0.01_peak_1021
c	hr1 43237475 43237778 304 43237672 14.00 8.21768 4.88679 6.09	597 E11.5_MANP_CHIP_HAND2_REP1_REP2_pooled_q0.01_peak_1022
c	hr1 43264509 43264742 234 43264586 14.00 6.53621 3.94387 4.50	495 E11.5_MANP_CHIP_HAND2_REP1_REP2_pooled_q0.01_peak_1023
c	hr1 43300667 43300864 198 43300767 18.00 9.73159 4.99556 7.56	505 E11.5_MANP_CHIP_HAND2_REP1_REP2_pooled_q0.01_peak_1024
c	hr1 43311118 43311335 218 43311233 17.00 10.96977 5.86415 8.7	3922 E11.5_MANP_CHIP_HAND2_REP1_REP2_pooled_q0.01_peak_1025
c	hr1 43358166 43358606 441 43358377 73.00 85.03211 24.10815 81	.82499 E11.5_MANP_CHIP_HAND2_REP1_REP2_pooled_q0.01_peak_1026
c	hr1 43361207 43361723 517 43361550 40.00 37.45079 13.35722 34	.69261 E11.5_MANP_CHIP_HAND2_REP1_REP2_pooled_q0.01_peak_1027
c	hr1 43362266 43362573 308 43362420 38.00 34.86656 12.70565 32	.14407 E11.5_MANP_CHIP_HAND2_REP1_REP2_pooled_q0.01_peak_1028
c	hr1 43374887 43375120 234 43375002 23.00 17.07331 7.81886 14.	66632 E11.5_MANP_CHIP_HAND2_REP1_REP2_pooled_q0.01_peak_1029
c	hr1 43396419 43396931 513 43396549 11.00 5.71447 3.90943 3.73	470 E11.5_MANP_CHIP_HAND2_REP1_REP2_pooled_q0.01_peak_1030
c	hr1 43400603 43401000 398 43400838 27.00 21.50661 9.12200 19.	00221 E11.5_MANP_CHIP_HAND2_REP1_REP2_pooled_q0.01_peak_1031
c	hr1 43433066 43433389 324 43433227 12.00 6.51816 4.23522 4.49	107 E11.5_MANP_CHIP_HAND2_REP1_REP2_pooled_q0.01_peak_1032
c	hr1 43445049 43446553 1505 43445426 230.00 320.18506 50.17008	315.54529 E11.5_MANP_CHIP_HAND2_REP1_REP2_pooled_q0.01_peak_1033a
c	hr1 43445049 43446553 1505 43446388 13.00 7.35325 4.56100 5.2	7687 E11.5_MANP_CHIP_HAND2_REP1_REP2_pooled_q0.01_peak_1033b
c	hr1 43447228 43447587 360 43447425 15.00 9.10962 5.21257 6.94	957 E11.5_MANP_CHIP_HAND2_REP1_REP2_pooled_q0.01_peak_1034
c	hr1 43447673 43448315 643 43447947 71.00 72.75445 18.93056 69	.65196 E11.5_MANP_CHIP_HAND2_REP1_REP2_pooled_q0.01_peak_1035
c	hr1 43453427 43453615 189 43453580 15.00 6.53181 3.80603 4.50	332 E11.5_MANP_CHIP_HAND2_REP1_REP2_pooled_q0.01_peak_1036
c	hr1 43459957 43460170 214 43460061 11.00 5.71447 3.90943 3.73	470 E11.5_MANP_CHIP_HAND2_REP1_REP2_pooled_q0.01_peak_1037
c	hr1 43461369 43461558 190 43461497 17.00 9.93841 5.28962 7.76	693 E11.5_MANP_CHIP_HAND2_REP1_REP2_pooled_q0.01_peak_1038
c	hr1 43496028 43496588 561 43496300 96.00 87.91730 16.70748 84	.69263 E11.5_MANP_CHIP_HAND2_REP1_REP2_pooled_q0.01_peak_1039
c	hr1 43506225 43506637 413 43506433 45.00 44.08999 14.98615 41	.25264 E11.5_MANP_CHIP_HAND2_REP1_REP2_pooled_q0.01_peak_1040
c	hr1 43566773 43567042 270 43566898 17.00 6.59778 3.59653 4.56	028 E11.5_MANP_CHIP_HAND2_REP1_REP2_pooled_q0.01_peak_1041
c	hr1 43672134 43672583 450 43672332 39.00 36.15333 13.03143 33	.41379 E11.5_MANP_CHIP_HAND2_REP1_REP2_pooled_q0.01_peak_1042
c	hr1 43676587 43677660 1074 43676936 73.00 85.03211 24.10815 8	1.82499 E11.5_MANP_CHIP_HAND2_REP1_REP2_pooled_q0.01_peak_1043a
c	hr1 43676587 43677660 1074 43677587 14.00 8.21768 4.88679 6.0	9597 E11.5_MANP_CHIP_HAND2_REP1_REP2_pooled_q0.01_peak_1043b
c	hr1 43698481 43698811 331 43698658 15.00 9.10962 5.21257 6.94	957 E11.5_MANP_CHIP_HAND2_REP1_REP2_pooled_q0.01_peak_1044
c	hr1 43732438 43732789 352 43732583 20.00 12.70653 6.17122 10.	43389 E11.5_MANP_CHIP_HAND2_REP1_REP2_pooled_q0.01_peak_1045
c	hr1 43765332 43765785 454 43765640 20.00 13.93124 6.84150 11.	60594 E11.5_MANP_CHIP_HAND2_REP1_REP2_pooled_q0.01_peak_1046
c	hr1 43822784 43822981 198 43822848 12.00 6.51816 4.23522 4.49	107 E11.5_MANP_CHIP_HAND2_REP1_REP2_pooled_q0.01_peak_1047
c	hr1 43827814 43828200 387 43828026 17.00 10.32663 5.50335 8.1	2852 E11.5_MANP_CHIP_HAND2_REP1_REP2_pooled_q0.01_peak_1048
c	hr1 43877293 43877490 198 43877398 14.00 8.21768 4.88679 6.09	597 E11.5_MANP_CHIP_HAND2_REP1_REP2_pooled_q0.01_peak_1049
c	hr1 43884307 43884722 416 43884492 34.00 29.83204 11.40250 27	.18352 E11.5_MANP_CHIP_HAND2_REP1_REP2_pooled_q0.01_peak_1050
c	hr1 43900519 43900759 241 43900613 11.00 5.71447 3.90943 3.73	470 E11.5_MANP_CHIP_HAND2_REP1_REP2_pooled_q0.01_peak_1051
c	hr1 43932930 43933290 361 43933130 18.00 11.93525 6.18993 9.6	7149 E11.5_MANP_CHIP_HAND2_REP1_REP2_pooled_q0.01_peak_1052
c	hr1 43933507 43934165 659 43933771 19.00 11.76255 5.87735 9.5	2147 E11.5_MANP_CHIP_HAND2_REP1_REP2_pooled_q0.01_peak_1053
c	hr1 44102304 44102737 434 44102533 17.00 9.93841 5.28962 7.76	693 E11.5_MANP_CHIP_HAND2_REP1_REP2_pooled_q0.01_peak_1054
c	hr1 44119246 44120118 873 44119400 15.00 9.10962 5.21257 6.94	957 E11.5_MANP_CHIP_HAND2_REP1_REP2_pooled_q0.01_peak_1055a
c	hr1 44119246 44120118 873 44119679 13.00 7.35325 4.56100 5.27	687 E11.5_MANP_CHIP_HAND2_REP1_REP2_pooled_q0.01_peak_1055b
c	hr1 44119246 44120118 873 44119912 16.00 10.02746 5.53836 7.8	3127 E11.5_MANP_CHIP_HAND2_REP1_REP2_pooled_q0.01_peak_1055c
c	hr1 44148060 44148338 279 44148176 18.00 11.93525 6.18993 9.6	7149 E11.5_MANP_CHIP_HAND2_REP1_REP2_pooled_q0.01_peak_1056
c	hr1 44169482 44170063 582 44169768 105.00 123.81105 27.86999	120.34127 E11.5_MANP_CHIP_HAND2_REP1_REP2_pooled_q0.01_peak_1057
c	hr1 44551431 44552057 627 44551571 23.00 17.07331 7.81886 14.	66632 E11.5_MANP_CHIP_HAND2_REP1_REP2_pooled_q0.01_peak_1058a
c	hr1 44551431 44552057 627 44551920 21.00 14.95972 7.16729 12.	60612 E11.5_MANP_CHIP_HAND2_REP1_REP2_pooled_q0.01_peak_1058b
c	hr1 44575967 44576236 270 44576105 20.00 13.93124 6.84150 11.	60594 E11.5_MANP_CHIP_HAND2_REP1_REP2_pooled_q0.01_peak_1059
c	hr1 44584713 44585509 797 44584927 31.00 26.18317 10.42515 23	.59259 E11.5_MANP_CHIP_HAND2_REP1_REP2_pooled_q0.01_peak_1060
c	hr1 44589566 44589856 291 44589711 24.00 18.15687 8.14465 15.	72300 E11.5_MANP_CHIP_HAND2_REP1_REP2_pooled_q0.01_peak_1061
c	hr1 44591753 44592270 518 44591980 141.00 201.47006 46.26159	197.53879 E11.5_MANP_CHIP_HAND2_REP1_REP2_pooled_q0.01_peak_1062
c	hr1 44593762 44593952 191 44593856 13.00 7.35325 4.56100 5.27	687 E11.5_MANP_CHIP_HAND2_REP1_REP2_pooled_q0.01_peak_1063
c	hr1 44613533 44613721 189 44613624 14.00 8.21768 4.88679 6.09	597 E11.5_MANP_CHIP_HAND2_REP1_REP2_pooled_q0.01_peak_1064
c	hr1 44618567 44619248 682 44618947 118.00 160.04942 38.76852	156.35674 E11.5_MANP_CHIP_HAND2_REP1_REP2_pooled_q0.01_peak_1065
c	hr1 44678800 44679929 1130 44679181 110.00 146.07581 36.16223	142.46442 E11.5_MANP_CHIP_HAND2_REP1_REP2_pooled_q0.01_peak_1066a
c	hr1 44678800 44679929 1130 44679509 86.00 105.73194 28.34337	102.37708 E11.5_MANP_CHIP_HAND2_REP1_REP2_pooled_q0.01_peak_1066b
c	hr1 44748203 44748653 451 44748428 84.00 102.48941 27.69180 9	9.15623 E11.5_MANP_CHIP_HAND2_REP1_REP2_pooled_q0.01_peak_1067
c	hr1 44750633 44750965 333 44750723 11.00 5.71447 3.90943 3.73	470 E11.5_MANP_CHIP_HAND2_REP1_REP2_pooled_q0.01_peak_1068
c	hr1 44751286 44752068 783 44751441 31.00 26.18317 10.42515 23	.59259 E11.5_MANP_CHIP_HAND2_REP1_REP2_pooled_q0.01_peak_1069a
c	hr1 44751286 44752068 783 44751808 17.00 9.93841 5.28962 7.76	693 E11.5_MANP_CHIP_HAND2_REP1_REP2_pooled_q0.01_peak_1069b
c	hr1 44777655 44777938 284 44777784 19.00 11.76255 5.87735 9.5	2147 E11.5_MANP_CHIP_HAND2_REP1_REP2_pooled_q0.01_peak_1070
c	hr1 44779074 44779291 218 44779198 14.00 8.21768 4.88679 6.09	597 E11.5_MANP_CHIP_HAND2_REP1_REP2_pooled_q0.01_peak_1071
c	hr1 44781668 44782275 608 44781979 84.00 86.84252 20.21953 83	.62218 E11.5_MANP_CHIP_HAND2_REP1_REP2_pooled_q0.01_peak_1072
c	hr1 44822351 44822725 375 44822608 29.00 16.02566 5.99422 13.	64465 E11.5_MANP_CHIP_HAND2_REP1_REP2_pooled_q0.01_peak_1073
c	hr1 44824139 44824361 223 44824235 25.00 17.70976 7.64056 15.	29538 E11.5_MANP_CHIP_HAND2_REP1_REP2_pooled_q0.01_peak_1074
c	hr1 44825860 44826048 189 44825908 15.00 6.18808 3.63133 4.19	570 E11.5_MANP_CHIP_HAND2_REP1_REP2_pooled_q0.01_peak_1075
c	hr1 44833863 44834542 680 44834166 87.00 101.79536 25.86036 9	8.46981 E11.5_MANP_CHIP_HAND2_REP1_REP2_pooled_q0.01_peak_1076
c	hr1 44849261 44849816 556 44849481 28.00 20.91265 8.52216 18.	42583 E11.5_MANP_CHIP_HAND2_REP1_REP2_pooled_q0.01_peak_1077
c	hr1 44878473 44878959 487 44878818 12.00 6.51816 4.23522 4.49	107 E11.5_MANP_CHIP_HAND2_REP1_REP2_pooled_q0.01_peak_1078
c	hr1 44892245 44892575 331 44892412 9.00 4.21116 3.25786 2.340	25 E11.5_MANP_CHIP_HAND2_REP1_REP2_pooled_q0.01_peak_1079
c	hr1 44940352 44940553 202 44940447 10.00 4.94456 3.58364 3.01	655 E11.5_MANP_CHIP_HAND2_REP1_REP2_pooled_q0.01_peak_1080
c	hr1 45020433 45021707 1275 45020773 189.00 239.22507 37.96341	235.07668 E11.5_MANP_CHIP_HAND2_REP1_REP2_pooled_q0.01_peak_1081a
c	hr1 45020433 45021707 1275 45021341 111.00 147.80923 36.48802	144.18756 E11.5_MANP_CHIP_HAND2_REP1_REP2_pooled_q0.01_peak_1081b
c	hr1 45031586 45032033 448 45031837 29.00 23.81653 9.77358 21.	26746 E11.5_MANP_CHIP_HAND2_REP1_REP2_pooled_q0.01_peak_1082
c	hr1 45043136 45043761 626 45043339 38.00 34.86656 12.70565 32	.14407 E11.5_MANP_CHIP_HAND2_REP1_REP2_pooled_q0.01_peak_1083a
c	hr1 45043136 45043761 626 45043602 14.00 6.53621 3.94387 4.50	495 E11.5_MANP_CHIP_HAND2_REP1_REP2_pooled_q0.01_peak_1083b
c	hr1 45056092 45056554 463 45056316 98.00 125.58898 32.25280 1	22.10310 E11.5_MANP_CHIP_HAND2_REP1_REP2_pooled_q0.01_peak_1084
c	hr1 45089612 45089823 212 45089704 10.00 4.94456 3.58364 3.01	655 E11.5_MANP_CHIP_HAND2_REP1_REP2_pooled_q0.01_peak_1085
c	hr1 45115481 45115750 270 45115607 23.00 17.07331 7.81886 14.	66632 E11.5_MANP_CHIP_HAND2_REP1_REP2_pooled_q0.01_peak_1086
c	hr1 45116631 45117115 485 45116867 47.00 43.68247 14.02641 40	.85665 E11.5_MANP_CHIP_HAND2_REP1_REP2_pooled_q0.01_peak_1087
c	hr1 45276116 45276655 540 45276519 13.00 6.57881 4.11415 4.54	160 E11.5_MANP_CHIP_HAND2_REP1_REP2_pooled_q0.01_peak_1088
c	hr1 45285642 45285934 293 45285775 23.00 17.07331 7.81886 14.	66632 E11.5_MANP_CHIP_HAND2_REP1_REP2_pooled_q0.01_peak_1089
c	hr1 45287905 45288299 395 45288099 38.00 34.86656 12.70565 32	.14407 E11.5_MANP_CHIP_HAND2_REP1_REP2_pooled_q0.01_peak_1090
c	hr1 45290126 45290421 296 45290219 10.00 4.94456 3.58364 3.01	655 E11.5_MANP_CHIP_HAND2_REP1_REP2_pooled_q0.01_peak_1091
c	hr1 45290611 45291008 398 45290873 20.00 13.93124 6.84150 11.	60594 E11.5_MANP_CHIP_HAND2_REP1_REP2_pooled_q0.01_peak_1092
c	hr1 45295972 45296167 196 45296083 14.00 8.21768 4.88679 6.09	597 E11.5_MANP_CHIP_HAND2_REP1_REP2_pooled_q0.01_peak_1093
c	hr1 45310932 45311802 871 45311191 65.00 72.77387 21.50187 69	.66489 E11.5_MANP_CHIP_HAND2_REP1_REP2_pooled_q0.01_peak_1094a
c	hr1 45310932 45311802 871 45311543 19.00 12.92276 6.51572 10.	62788 E11.5_MANP_CHIP_HAND2_REP1_REP2_pooled_q0.01_peak_1094b
c	hr1 45311976 45312279 304 45312139 17.00 10.96977 5.86415 8.7	3922 E11.5_MANP_CHIP_HAND2_REP1_REP2_pooled_q0.01_peak_1095
c	hr1 45313005 45313222 218 45313181 14.00 8.21768 4.88679 6.09	597 E11.5_MANP_CHIP_HAND2_REP1_REP2_pooled_q0.01_peak_1096
c	hr1 45313759 45314220 462 45314030 36.00 32.32619 12.05408 29	.64147 E11.5_MANP_CHIP_HAND2_REP1_REP2_pooled_q0.01_peak_1097
c	hr1 45315774 45317388 1615 45315895 14.00 6.53621 3.94387 4.5	0495 E11.5_MANP_CHIP_HAND2_REP1_REP2_pooled_q0.01_peak_1098a
c	hr1 45315774 45317388 1615 45316352 27.00 21.50661 9.12200 19	.00221 E11.5_MANP_CHIP_HAND2_REP1_REP2_pooled_q0.01_peak_1098b
c	hr1 45315774 45317388 1615 45316893 117.00 125.29028 23.57727	121.81094 E11.5_MANP_CHIP_HAND2_REP1_REP2_pooled_q0.01_peak_1098c
c	hr1 45320851 45321266 416 45321082 34.00 29.83204 11.40250 27	.18352 E11.5_MANP_CHIP_HAND2_REP1_REP2_pooled_q0.01_peak_1099
c	hr1 45358131 45358319 189 45358237 11.00 5.71447 3.90943 3.73	470 E11.5_MANP_CHIP_HAND2_REP1_REP2_pooled_q0.01_peak_1100
c	hr1 45379916 45380194 279 45380043 19.00 12.92276 6.51572 10.	62788 E11.5_MANP_CHIP_HAND2_REP1_REP2_pooled_q0.01_peak_1101
c	hr1 45385709 45385964 256 45385835 15.00 9.10962 5.21257 6.94	957 E11.5_MANP_CHIP_HAND2_REP1_REP2_pooled_q0.01_peak_1102
c	hr1 45431911 45432167 257 45432026 19.00 12.92276 6.51572 10.	62788 E11.5_MANP_CHIP_HAND2_REP1_REP2_pooled_q0.01_peak_1103
c	hr1 45460664 45460912 249 45460757 11.00 5.71447 3.90943 3.73	470 E11.5_MANP_CHIP_HAND2_REP1_REP2_pooled_q0.01_peak_1104
c	hr1 45501975 45502763 789 45502203 66.00 74.28429 21.82765 71	.16251 E11.5_MANP_CHIP_HAND2_REP1_REP2_pooled_q0.01_peak_1105a
c	hr1 45501975 45502763 789 45502627 13.00 7.35325 4.56100 5.27	687 E11.5_MANP_CHIP_HAND2_REP1_REP2_pooled_q0.01_peak_1105b
c	hr1 45503009 45503488 480 45503144 20.00 13.93124 6.84150 11.	60594 E11.5_MANP_CHIP_HAND2_REP1_REP2_pooled_q0.01_peak_1106
c	hr1 45672819 45673126 308 45672958 20.00 13.93124 6.84150 11.	60594 E11.5_MANP_CHIP_HAND2_REP1_REP2_pooled_q0.01_peak_1107
c	hr1 45675675 45676335 661 45676078 85.00 104.10816 28.01758 1	00.76418 E11.5_MANP_CHIP_HAND2_REP1_REP2_pooled_q0.01_peak_1108
c	hr1 45756913 45757155 243 45757039 23.00 12.98876 5.70904 10.	69282 E11.5_MANP_CHIP_HAND2_REP1_REP2_pooled_q0.01_peak_1109
[truncated: 96,974 more rows]
