# Supplementary material for: Gli3 utilizes Hand2 to synergistically regulate tissue-specific transcriptional networks
Source: eLife. 2020 Oct 2;9:e56450. doi: 10.7554/eLife.56450 (PMC7556880; doi:10.7554/eLife.56450)
Supplement: Supplementary file 5. [file elife-56450-supp5.xlsx]

## Sheet: E11.5_Gli3FLAG_MNP_rep1_2_share
chr1	4857800	4858128	G3_MNP_rep1_418,G3_MNP_rep2_1121
chr1	8123238	8123290	G3_MNP_rep2_64,G3_MNP_rep1_85
chr1	9943672	9944053	G3_MNP_rep2_973,G3_MNP_rep1_1882
chr1	20466284	20466635	G3_MNP_rep1_1535,G3_MNP_rep2_366
chr1	25228718	25228771	G3_MNP_rep1_285,G3_MNP_rep2_716
chr1	36588527	36588704	G3_MNP_rep2_907,G3_MNP_rep1_1684
chr1	37122311	37122468	G3_MNP_rep1_875,G3_MNP_rep2_719
chr1	39576748	39577238	G3_MNP_rep1_2728,G3_MNP_rep2_1191
chr1	43445151	43445578	G3_MNP_rep1_511,G3_MNP_rep2_313
chr1	56016855	56016943	G3_MNP_rep1_1739,G3_MNP_rep2_687
chr1	56286759	56286862	G3_MNP_rep1_1919,G3_MNP_rep2_301
chr1	59762351	59762763	G3_MNP_rep1_2775,G3_MNP_rep2_709
chr1	60860736	60860816	G3_MNP_rep1_1609,G3_MNP_rep2_791
chr1	72254947	72255273	G3_MNP_rep1_1735,G3_MNP_rep2_413
chr1	74275013	74275100	G3_MNP_rep2_420,G3_MNP_rep1_1072
chr1	75505769	75506093	G3_MNP_rep1_1358,G3_MNP_rep2_930
chr1	75521071	75521443	G3_MNP_rep2_333,G3_MNP_rep1_357
chr1	82724913	82725233	G3_MNP_rep2_1127,G3_MNP_rep1_1415
chr1	90028478	90028550	G3_MNP_rep2_596,G3_MNP_rep1_209
chr1	90335715	90335904	G3_MNP_rep1_1820,G3_MNP_rep2_933
chr1	92611180	92611288	G3_MNP_rep1_317,G3_MNP_rep2_293
chr1	93478249	93478308	G3_MNP_rep2_55,G3_MNP_rep1_91
chr1	106759857	106760017	G3_MNP_rep1_1960,G3_MNP_rep2_1091
chr1	125560549	125560850	G3_MNP_rep1_440,G3_MNP_rep2_227
chr1	127537586	127537658	G3_MNP_rep2_626,G3_MNP_rep1_610
chr1	133077238	133077341	G3_MNP_rep2_299,G3_MNP_rep1_796
chr1	133610041	133610178	G3_MNP_rep1_540,G3_MNP_rep2_504
chr1	136588629	136589085	G3_MNP_rep2_360,G3_MNP_rep1_145
chr1	146106995	146107084	G3_MNP_rep1_137,G3_MNP_rep2_118
chr1	153487084	153487529	G3_MNP_rep1_970,G3_MNP_rep2_659
chr1	153899942	153900401	G3_MNP_rep2_384,G3_MNP_rep1_191
chr1	155083664	155084010	G3_MNP_rep1_1175,G3_MNP_rep2_1109
chr1	155212547	155212654	G3_MNP_rep2_99,G3_MNP_rep1_136
chr1	156558781	156559098	G3_MNP_rep2_748,G3_MNP_rep1_1023
chr1	163311889	163312715	G3_MNP_rep1_1903,G3_MNP_rep2_1065,G3_MNP_rep1_2697
chr1	171064278	171064757	G3_MNP_rep1_2692,G3_MNP_rep2_506
chr1	171150351	171150563	G3_MNP_rep2_749,G3_MNP_rep1_952
chr1	171222612	171222709	G3_MNP_rep2_123,G3_MNP_rep1_405
chr1	172026850	172027045	G3_MNP_rep2_1118,G3_MNP_rep1_3501
chr1	172618297	172618400	G3_MNP_rep1_125,G3_MNP_rep2_80
chr1	173361805	173361881	G3_MNP_rep1_86,G3_MNP_rep2_183
chr1	178276260	178276587	G3_MNP_rep2_1194,G3_MNP_rep1_772
chr1	178406310	178406427	G3_MNP_rep1_159,G3_MNP_rep2_305
chr1	179446605	179446705	G3_MNP_rep2_228,G3_MNP_rep1_530
chr1	179803260	179803593	G3_MNP_rep2_804,G3_MNP_rep1_773
chr1	182145718	182145860	G3_MNP_rep1_331,G3_MNP_rep2_255
chr1	185741438	185741670	G3_MNP_rep2_847,G3_MNP_rep1_2514
chr10	3109582	3110339	G3_MNP_rep1_3445,G3_MNP_rep1_2281,G3_MNP_rep2_368
chr10	3111458	3111643	G3_MNP_rep1_4459,G3_MNP_rep2_514
chr10	3113742	3113815	G3_MNP_rep1_3490,G3_MNP_rep2_280
chr10	3114245	3115200	G3_MNP_rep1_4117,G3_MNP_rep2_1184,G3_MNP_rep1_3247,G3_MNP_rep2_463,G3_MNP_rep2_294
chr10	3116410	3116786	G3_MNP_rep2_857,G3_MNP_rep1_3978
chr10	4387125	4387464	G3_MNP_rep1_1915,G3_MNP_rep2_967
chr10	19907419	19907578	G3_MNP_rep2_391,G3_MNP_rep1_2279
chr10	23562410	23562539	G3_MNP_rep1_3815,G3_MNP_rep2_353
chr10	23741951	23742229	G3_MNP_rep1_1467,G3_MNP_rep2_799
chr10	31445662	31445752	G3_MNP_rep2_157,G3_MNP_rep1_268
chr10	38554186	38554258	G3_MNP_rep2_149,G3_MNP_rep1_339
chr10	39523078	39523180	G3_MNP_rep2_331,G3_MNP_rep1_856
chr10	43578654	43579182	G3_MNP_rep1_707,G3_MNP_rep2_1265,G3_MNP_rep1_603
chr10	58446890	58447255	G3_MNP_rep2_604,G3_MNP_rep1_1671
chr10	60445340	60445416	G3_MNP_rep2_460,G3_MNP_rep1_307
chr10	61783238	61783891	G3_MNP_rep1_890,G3_MNP_rep2_779,G3_MNP_rep1_1184
chr10	61826909	61826990	G3_MNP_rep2_148,G3_MNP_rep1_180
chr10	63023054	63023518	G3_MNP_rep1_3052,G3_MNP_rep2_884,G3_MNP_rep1_2983
chr10	67096543	67096845	G3_MNP_rep1_1022,G3_MNP_rep2_1227
chr10	69352522	69352825	G3_MNP_rep1_1020,G3_MNP_rep2_610
chr10	77191158	77191264	G3_MNP_rep2_619,G3_MNP_rep1_724
chr10	77252761	77252936	G3_MNP_rep1_781,G3_MNP_rep2_1015
chr10	79777399	79777482	G3_MNP_rep1_512,G3_MNP_rep2_854
chr10	80150533	80151034	G3_MNP_rep1_581,G3_MNP_rep2_823
chr10	80798671	80799045	G3_MNP_rep2_526,G3_MNP_rep1_1750
chr10	80928623	80928878	G3_MNP_rep2_1226,G3_MNP_rep1_1125
chr10	84441000	84441151	G3_MNP_rep2_1275,G3_MNP_rep1_883
chr10	84917316	84917549	G3_MNP_rep1_2453,G3_MNP_rep2_882
chr10	87860502	87860851	G3_MNP_rep2_1276,G3_MNP_rep1_614
chr10	106609090	106609367	G3_MNP_rep2_510,G3_MNP_rep1_673
chr10	111298658	111298905	G3_MNP_rep2_947,G3_MNP_rep1_465
chr10	112928750	112928918	G3_MNP_rep1_197,G3_MNP_rep2_193
chr10	119239331	119239462	G3_MNP_rep2_593,G3_MNP_rep1_591
chr10	120474430	120474620	G3_MNP_rep1_1012,G3_MNP_rep2_509
chr10	120475733	120476110	G3_MNP_rep1_493,G3_MNP_rep2_851
chr10	120551990	120552085	G3_MNP_rep1_236,G3_MNP_rep2_121
chr10	126680990	126681167	G3_MNP_rep2_139,G3_MNP_rep1_134
chr10	127063616	127063841	G3_MNP_rep1_1390,G3_MNP_rep2_725
chr10	128083312	128083689	G3_MNP_rep1_1187,G3_MNP_rep2_850
chr10	128322553	128322940	G3_MNP_rep2_721,G3_MNP_rep1_2089
chr10	128377096	128377531	G3_MNP_rep2_1017,G3_MNP_rep1_315
chr10	128409610	128409716	G3_MNP_rep2_849,G3_MNP_rep1_1459
chr10	128695845	128696343	G3_MNP_rep2_307,G3_MNP_rep1_526
chr10	130280117	130280183	G3_MNP_rep2_635,G3_MNP_rep1_147
chr11	3202082	3202266	G3_MNP_rep1_1710,G3_MNP_rep2_878
chr11	3289728	3289833	G3_MNP_rep1_233,G3_MNP_rep2_592
chr11	3408863	3409103	G3_MNP_rep2_955,G3_MNP_rep1_850
chr11	3648423	3648663	G3_MNP_rep1_1288,G3_MNP_rep2_733
chr11	5098606	5098915	G3_MNP_rep1_608,G3_MNP_rep2_751
chr11	6415514	6416373	G3_MNP_rep1_4349,G3_MNP_rep1_1758,G3_MNP_rep2_1089,G3_MNP_rep1_2967,G3_MNP_rep2_789
chr11	8624302	8624480	G3_MNP_rep2_1043,G3_MNP_rep1_452
chr11	8625682	8625765	G3_MNP_rep2_877,G3_MNP_rep1_3319
chr11	12025813	12025916	G3_MNP_rep2_642,G3_MNP_rep1_273
chr11	20830452	20830578	G3_MNP_rep2_469,G3_MNP_rep1_480
chr11	22512258	22512591	G3_MNP_rep1_547,G3_MNP_rep2_794
chr11	23008304	23008529	G3_MNP_rep2_953,G3_MNP_rep1_3526
chr11	23307014	23307328	G3_MNP_rep1_940,G3_MNP_rep2_950
chr11	24049331	24049468	G3_MNP_rep1_925,G3_MNP_rep2_532
chr11	28623312	28623510	G3_MNP_rep2_335,G3_MNP_rep1_1602
chr11	29547422	29547846	G3_MNP_rep1_3823,G3_MNP_rep2_949
chr11	33162595	33163002	G3_MNP_rep2_948,G3_MNP_rep1_1751
chr11	35507760	35508071	G3_MNP_rep2_474,G3_MNP_rep1_3811
chr11	35655954	35656052	G3_MNP_rep2_567,G3_MNP_rep1_1367
chr11	35769798	35769955	G3_MNP_rep2_385,G3_MNP_rep1_430
chr11	50291853	50292266	G3_MNP_rep2_1152,G3_MNP_rep1_613
chr11	51605783	51606391	G3_MNP_rep1_3873,G3_MNP_rep2_1128
chr11	51637999	51638186	G3_MNP_rep2_338,G3_MNP_rep1_763
chr11	52232041	52232397	G3_MNP_rep1_388,G3_MNP_rep2_270
chr11	54866822	54866949	G3_MNP_rep1_657,G3_MNP_rep2_812
chr11	55607876	55607913	G3_MNP_rep2_37,G3_MNP_rep1_23
chr11	55810873	55810912	G3_MNP_rep1_194,G3_MNP_rep2_328
chr11	59506228	59506533	G3_MNP_rep1_1598,G3_MNP_rep2_1126
chr11	60105507	60105911	G3_MNP_rep2_704,G3_MNP_rep1_343
chr11	60113615	60113786	G3_MNP_rep2_316,G3_MNP_rep1_1594
chr11	60166031	60166176	G3_MNP_rep2_820,G3_MNP_rep1_2189
chr11	60176773	60176887	G3_MNP_rep1_1361,G3_MNP_rep2_505
chr11	65162672	65163009	G3_MNP_rep2_527,G3_MNP_rep1_230
chr11	72041895	72042255	G3_MNP_rep2_1222,G3_MNP_rep1_720
chr11	75142020	75142091	G3_MNP_rep2_150,G3_MNP_rep1_289
chr11	75531769	75532100	G3_MNP_rep1_674,G3_MNP_rep2_243
chr11	77488783	77488833	G3_MNP_rep2_1221,G3_MNP_rep1_332
chr11	78188372	78188760	G3_MNP_rep1_3171,G3_MNP_rep2_1281
chr11	78189431	78189502	G3_MNP_rep1_65,G3_MNP_rep2_36
chr11	78245780	78246152	G3_MNP_rep1_553,G3_MNP_rep2_471
chr11	79200557	79200737	G3_MNP_rep2_556,G3_MNP_rep1_1961
chr11	80428389	80428491	G3_MNP_rep2_246,G3_MNP_rep1_238
chr11	87264073	87264167	G3_MNP_rep2_262,G3_MNP_rep1_542
chr11	87422887	87423070	G3_MNP_rep1_437,G3_MNP_rep2_771
chr11	87426667	87426880	G3_MNP_rep2_1119,G3_MNP_rep1_370
chr11	87443275	87443360	G3_MNP_rep1_340,G3_MNP_rep2_1056
chr11	87462270	87462411	G3_MNP_rep2_777,G3_MNP_rep1_561
chr11	87471375	87471490	G3_MNP_rep2_929,G3_MNP_rep1_424
chr11	95210672	95210762	G3_MNP_rep1_1244,G3_MNP_rep2_970
chr11	95991124	95991570	G3_MNP_rep1_364,G3_MNP_rep2_158
chr11	96005466	96005684	G3_MNP_rep2_766,G3_MNP_rep1_899
chr11	98002644	98002723	G3_MNP_rep2_608,G3_MNP_rep1_549
chr11	98026974	98027134	G3_MNP_rep2_905,G3_MNP_rep1_574
chr11	99132317	99132527	G3_MNP_rep1_573,G3_MNP_rep2_422
chr11	99230079	99230400	G3_MNP_rep2_202,G3_MNP_rep1_212
chr11	100320027	100320289	G3_MNP_rep2_519,G3_MNP_rep1_1183
chr11	100545580	100545622	G3_MNP_rep1_2235,G3_MNP_rep2_502
chr11	100619370	100619852	G3_MNP_rep1_1823,G3_MNP_rep2_1023
chr11	101226069	101226133	G3_MNP_rep2_357,G3_MNP_rep1_294
chr11	101246554	101246608	G3_MNP_rep1_312,G3_MNP_rep2_617
chr11	101645716	101645897	G3_MNP_rep1_625,G3_MNP_rep2_1223
chr11	101658182	101658386	G3_MNP_rep2_1200,G3_MNP_rep1_730
chr11	102604631	102604948	G3_MNP_rep1_3795,G3_MNP_rep2_826
chr11	102631142	102631468	G3_MNP_rep2_324,G3_MNP_rep1_1031
chr11	102778172	102778493	G3_MNP_rep2_472,G3_MNP_rep1_919,G3_MNP_rep2_1133
chr11	103132293	103132767	G3_MNP_rep1_874,G3_MNP_rep2_1108
chr11	103920810	103920833	G3_MNP_rep1_59,G3_MNP_rep2_76
chr11	108920392	108920723	G3_MNP_rep2_805,G3_MNP_rep1_1231
chr11	115052355	115052385	G3_MNP_rep2_134,G3_MNP_rep1_115
chr11	115535910	115536069	G3_MNP_rep2_1020,G3_MNP_rep1_2337
chr11	118584939	118584992	G3_MNP_rep1_24,G3_MNP_rep2_25
chr11	118965123	118965293	G3_MNP_rep2_507,G3_MNP_rep1_1222
chr11	118998339	118998727	G3_MNP_rep2_529,G3_MNP_rep1_148
chr11	119187595	119187681	G3_MNP_rep2_1093,G3_MNP_rep1_776
chr11	119991408	119991495	G3_MNP_rep2_234,G3_MNP_rep1_187
chr11	120189457	120189771	G3_MNP_rep1_839,G3_MNP_rep2_605
chr11	120262076	120262382	G3_MNP_rep2_636,G3_MNP_rep1_2415
chr11	120262694	120262789	G3_MNP_rep1_891,G3_MNP_rep2_466
chr11	120311161	120311266	G3_MNP_rep1_893,G3_MNP_rep2_409
chr11	120990616	120991046	G3_MNP_rep2_954,G3_MNP_rep1_732
chr12	3787648	3787812	G3_MNP_rep2_341,G3_MNP_rep1_1457
chr12	9030175	9030394	G3_MNP_rep2_112,G3_MNP_rep1_139
chr12	12655476	12655742	G3_MNP_rep2_465,G3_MNP_rep1_729
chr12	13214780	13214900	G3_MNP_rep2_724,G3_MNP_rep1_2353
chr12	18467153	18467229	G3_MNP_rep1_229,G3_MNP_rep2_133
chr12	21373545	21373624	G3_MNP_rep1_752,G3_MNP_rep2_432
chr12	24425124	24425168	G3_MNP_rep2_11,G3_MNP_rep1_9
chr12	24830913	24831056	G3_MNP_rep2_622,G3_MNP_rep1_1077
chr12	27465810	27465931	G3_MNP_rep2_855,G3_MNP_rep1_1200
chr12	28907155	28907172	G3_MNP_rep1_1151,G3_MNP_rep2_577
chr12	29938144	29938484	G3_MNP_rep2_1082,G3_MNP_rep1_1906
chr12	31581019	31581104	G3_MNP_rep2_431,G3_MNP_rep1_422
chr12	42972887	42972932	G3_MNP_rep2_1,G3_MNP_rep1_1
chr12	51829174	51829289	G3_MNP_rep2_268,G3_MNP_rep1_213
chr12	54710293	54710519	G3_MNP_rep1_560,G3_MNP_rep2_1280
chr12	54729589	54729702	G3_MNP_rep2_1014,G3_MNP_rep1_548
chr12	55600318	55600371	G3_MNP_rep1_33,G3_MNP_rep2_47
chr12	59066835	59067496	G3_MNP_rep2_583,G3_MNP_rep1_428,G3_MNP_rep2_964
chr12	65036343	65036678	G3_MNP_rep1_606,G3_MNP_rep2_216
chr12	69361283	69361460	G3_MNP_rep2_792,G3_MNP_rep1_300
chr12	69892606	69892701	G3_MNP_rep2_1012,G3_MNP_rep1_1089
chr12	70974674	70975080	G3_MNP_rep1_728,G3_MNP_rep2_1073
chr12	71785097	71785155	G3_MNP_rep1_2901,G3_MNP_rep2_515
chr12	73907969	73908247	G3_MNP_rep2_1203,G3_MNP_rep1_1199
chr12	75836497	75836619	G3_MNP_rep2_468,G3_MNP_rep1_848
chr12	76255372	76255435	G3_MNP_rep2_551,G3_MNP_rep1_886
chr12	79683368	79683514	G3_MNP_rep2_254,G3_MNP_rep1_920
chr12	80112854	80112981	G3_MNP_rep2_1054,G3_MNP_rep1_2318
chr12	80259567	80259735	G3_MNP_rep2_168,G3_MNP_rep1_267
chr12	80435129	80435266	G3_MNP_rep2_417,G3_MNP_rep1_1595
chr12	81009985	81010100	G3_MNP_rep2_164,G3_MNP_rep1_152
chr12	87443251	87443579	G3_MNP_rep1_2808,G3_MNP_rep2_1008
chr12	87471963	87472189	G3_MNP_rep1_784,G3_MNP_rep2_1161
chr12	102605565	102605678	G3_MNP_rep2_98,G3_MNP_rep1_519
chr12	107334486	107334560	G3_MNP_rep1_607,G3_MNP_rep2_337
chr12	111814173	111814261	G3_MNP_rep1_224,G3_MNP_rep2_106
chr13	9763944	9764182	G3_MNP_rep2_363,G3_MNP_rep1_269
chr13	13455716	13455861	G3_MNP_rep2_1103,G3_MNP_rep1_4012
chr13	21362738	21362864	G3_MNP_rep2_585,G3_MNP_rep1_1497
chr13	21717679	21717906	G3_MNP_rep1_1827,G3_MNP_rep2_1166
chr13	21782721	21783340	G3_MNP_rep1_4310,G3_MNP_rep1_2162,G3_MNP_rep2_1034
chr13	23535430	23535903	G3_MNP_rep2_1107,G3_MNP_rep1_2172,G3_MNP_rep2_741
chr13	23561941	23562297	G3_MNP_rep1_1937,G3_MNP_rep2_1225
chr13	23762067	23762316	G3_MNP_rep1_3338,G3_MNP_rep2_1277
chr13	28640908	28641034	G3_MNP_rep2_72,G3_MNP_rep1_74
chr13	28951843	28952191	G3_MNP_rep2_572,G3_MNP_rep1_2043
chr13	30966699	30966756	G3_MNP_rep2_130,G3_MNP_rep1_214
chr13	31623976	31624132	G3_MNP_rep2_264,G3_MNP_rep1_336
chr13	32611570	32611624	G3_MNP_rep1_225,G3_MNP_rep2_263
chr13	34724693	34724794	G3_MNP_rep1_609,G3_MNP_rep2_439
chr13	34875572	34875877	G3_MNP_rep1_1632,G3_MNP_rep2_871
chr13	36529490	36529751	G3_MNP_rep2_241,G3_MNP_rep1_990
chr13	43891979	43892090	G3_MNP_rep1_2387,G3_MNP_rep2_315
chr13	44795975	44796103	G3_MNP_rep1_532,G3_MNP_rep2_443
chr13	54071585	54071761	G3_MNP_rep2_1002,G3_MNP_rep1_647
chr13	54332506	54332547	G3_MNP_rep2_44,G3_MNP_rep1_78
chr13	54750828	54750890	G3_MNP_rep2_26,G3_MNP_rep1_25
chr13	54971007	54971058	G3_MNP_rep2_3,G3_MNP_rep1_2
chr13	55211194	55211511	G3_MNP_rep2_873,G3_MNP_rep1_232
chr13	55421466	55421557	G3_MNP_rep1_1178,G3_MNP_rep2_541
chr13	56102303	56102445	G3_MNP_rep2_702,G3_MNP_rep1_1043
chr13	56612108	56612596	G3_MNP_rep2_1022,G3_MNP_rep1_4259
chr13	58127746	58128279	G3_MNP_rep1_605,G3_MNP_rep2_1148
chr13	58129024	58129343	G3_MNP_rep1_854,G3_MNP_rep2_1053
chr13	58402248	58402391	G3_MNP_rep2_284,G3_MNP_rep1_435
chr13	60084973	60085166	G3_MNP_rep2_772,G3_MNP_rep1_716
chr13	63431491	63431730	G3_MNP_rep1_414,G3_MNP_rep2_352
chr13	63528204	63528518	G3_MNP_rep1_1499,G3_MNP_rep2_456
chr13	63564908	63565096	G3_MNP_rep1_3934,G3_MNP_rep2_979
chr13	63566393	63566444	G3_MNP_rep2_70,G3_MNP_rep1_81
chr13	63569146	63569293	G3_MNP_rep2_184,G3_MNP_rep1_599
chr13	63719579	63719739	G3_MNP_rep2_776,G3_MNP_rep1_504
chr13	63726059	63726210	G3_MNP_rep2_1072,G3_MNP_rep1_1171
chr13	63901391	63901657	G3_MNP_rep1_181,G3_MNP_rep2_71
chr13	63918167	63918278	G3_MNP_rep1_160,G3_MNP_rep2_129
chr13	63980456	63980571	G3_MNP_rep2_91,G3_MNP_rep1_164
chr13	64003235	64003286	G3_MNP_rep1_369,G3_MNP_rep2_125
chr13	69535383	69535436	G3_MNP_rep2_591,G3_MNP_rep1_1861
chr13	81783177	81783575	G3_MNP_rep2_786,G3_MNP_rep1_1019
chr13	90039654	90039774	G3_MNP_rep2_223,G3_MNP_rep1_292
chr13	90923131	90923357	G3_MNP_rep2_408,G3_MNP_rep1_778
chr13	94976401	94976540	G3_MNP_rep2_781,G3_MNP_rep1_468
chr13	97577536	97577590	G3_MNP_rep2_565,G3_MNP_rep1_853
chr13	98391373	98391444	G3_MNP_rep2_934,G3_MNP_rep1_1195
chr13	98925764	98926751	G3_MNP_rep2_976,G3_MNP_rep1_207,G3_MNP_rep2_750,G3_MNP_rep1_1956
chr13	100210689	100210727	G3_MNP_rep1_138,G3_MNP_rep2_208
chr13	103920272	103920665	G3_MNP_rep2_876,G3_MNP_rep1_2370
chr13	103920914	103921406	G3_MNP_rep2_1244,G3_MNP_rep1_3907
chr13	119428995	119429563	G3_MNP_rep1_521,G3_MNP_rep2_924
chr14	16365356	16365730	G3_MNP_rep2_542,G3_MNP_rep1_685
chr14	18270193	18270498	G3_MNP_rep1_3675,G3_MNP_rep2_634
chr14	20794206	20794341	G3_MNP_rep2_612,G3_MNP_rep1_1284
chr14	25064376	25064451	G3_MNP_rep2_189,G3_MNP_rep1_337
chr14	25228790	25228906	G3_MNP_rep2_699,G3_MNP_rep1_715
chr14	27068009	27068100	G3_MNP_rep2_520,G3_MNP_rep1_1707
chr14	31269617	31269730	G3_MNP_rep2_303,G3_MNP_rep1_303
chr14	37016041	37016102	G3_MNP_rep2_179,G3_MNP_rep1_109
chr14	45826146	45826269	G3_MNP_rep2_615,G3_MNP_rep1_3377
chr14	46005424	46005541	G3_MNP_rep1_154,G3_MNP_rep2_237
chr14	47649351	47649719	G3_MNP_rep1_740,G3_MNP_rep2_806
chr14	54449433	54449486	G3_MNP_rep2_803,G3_MNP_rep1_557
chr14	57889827	57890178	G3_MNP_rep1_1433,G3_MNP_rep2_875
chr14	62292913	62293102	G3_MNP_rep2_347,G3_MNP_rep1_454
chr14	63681627	63681697	G3_MNP_rep2_28,G3_MNP_rep1_52
chr14	63713161	63713245	G3_MNP_rep1_57,G3_MNP_rep2_74
chr14	64568703	64568739	G3_MNP_rep2_63,G3_MNP_rep1_67
chr14	69443124	69443465	G3_MNP_rep2_843,G3_MNP_rep1_836
chr14	69661399	69661550	G3_MNP_rep2_997,G3_MNP_rep1_696
chr14	70153240	70153430	G3_MNP_rep2_1114,G3_MNP_rep1_2603
chr14	73143000	73143168	G3_MNP_rep2_649,G3_MNP_rep1_754
chr14	80257216	80257280	G3_MNP_rep1_3326,G3_MNP_rep2_537
chr14	110078388	110078534	G3_MNP_rep2_394,G3_MNP_rep1_1423
chr15	8443693	8444088	G3_MNP_rep2_841,G3_MNP_rep1_1302
chr15	8632192	8632548	G3_MNP_rep2_434,G3_MNP_rep1_416
chr15	9009211	9009296	G3_MNP_rep2_82,G3_MNP_rep1_113
chr15	12667930	12668047	G3_MNP_rep2_120,G3_MNP_rep1_308
chr15	12824808	12824944	G3_MNP_rep2_1035,G3_MNP_rep1_2579
chr15	34082714	34083106	G3_MNP_rep1_977,G3_MNP_rep2_564
chr15	34829441	34829524	G3_MNP_rep2_1033,G3_MNP_rep1_1372
chr15	56695031	56695335	G3_MNP_rep2_273,G3_MNP_rep1_700
chr15	56807795	56807942	G3_MNP_rep1_888,G3_MNP_rep2_646
chr15	58076100	58076256	G3_MNP_rep1_1073,G3_MNP_rep2_872
chr15	64578814	64579201	G3_MNP_rep1_311,G3_MNP_rep2_56
chr15	72568650	72568720	G3_MNP_rep2_5,G3_MNP_rep1_5
chr15	72689915	72689969	G3_MNP_rep2_14,G3_MNP_rep1_14
chr15	73732264	73732588	G3_MNP_rep1_1235,G3_MNP_rep2_993
chr15	74076058	74076124	G3_MNP_rep2_89,G3_MNP_rep1_69
chr15	74535909	74536026	G3_MNP_rep2_912,G3_MNP_rep1_3890
chr15	75642117	75642444	G3_MNP_rep2_765,G3_MNP_rep1_971
chr15	75968954	75969029	G3_MNP_rep2_412,G3_MNP_rep1_392
chr15	76351383	76351674	G3_MNP_rep1_1618,G3_MNP_rep2_552
chr15	76522229	76522263	G3_MNP_rep1_21,G3_MNP_rep2_35
chr15	78119863	78119940	G3_MNP_rep2_19,G3_MNP_rep1_27
chr15	80614111	80614281	G3_MNP_rep2_172,G3_MNP_rep1_264
chr15	81859884	81860043	G3_MNP_rep2_718,G3_MNP_rep1_352
chr15	82107036	82107155	G3_MNP_rep2_688,G3_MNP_rep1_1446
chr15	84086487	84086526	G3_MNP_rep2_286,G3_MNP_rep1_211
chr15	84829546	84829587	G3_MNP_rep2_22,G3_MNP_rep1_16
chr15	84923466	84923598	G3_MNP_rep1_2558,G3_MNP_rep2_870
chr15	85205854	85205955	G3_MNP_rep2_453,G3_MNP_rep1_496
chr15	88733418	88733876	G3_MNP_rep2_920,G3_MNP_rep1_1049
chr15	89453424	89453489	G3_MNP_rep1_167,G3_MNP_rep2_222
chr15	96284828	96285349	G3_MNP_rep2_1052,G3_MNP_rep1_895
chr15	96287537	96288104	G3_MNP_rep1_2736,G3_MNP_rep2_922,G3_MNP_rep1_1525
chr15	96699735	96700159	G3_MNP_rep2_865,G3_MNP_rep1_1452
chr15	102370942	102371077	G3_MNP_rep1_276,G3_MNP_rep2_395
chr15	102470806	102470933	G3_MNP_rep2_143,G3_MNP_rep1_165
chr16	4552864	4552948	G3_MNP_rep1_417,G3_MNP_rep2_292
chr16	4963975	4964386	G3_MNP_rep1_734,G3_MNP_rep2_176
chr16	7740539	7740602	G3_MNP_rep2_173,G3_MNP_rep1_215
chr16	8830574	8830864	G3_MNP_rep2_1049,G3_MNP_rep1_2753
chr16	10411886	10412147	G3_MNP_rep1_1144,G3_MNP_rep2_582
chr16	10565636	10565757	G3_MNP_rep1_688,G3_MNP_rep2_1048
chr16	10850425	10850577	G3_MNP_rep1_432,G3_MNP_rep2_365
chr16	10916407	10916474	G3_MNP_rep2_283,G3_MNP_rep1_1038
chr16	11253812	11254222	G3_MNP_rep2_868,G3_MNP_rep1_2461
chr16	17131893	17132102	G3_MNP_rep2_985,G3_MNP_rep1_304
chr16	17201059	17201413	G3_MNP_rep1_629,G3_MNP_rep2_598
chr16	20141092	20141285	G3_MNP_rep2_1155,G3_MNP_rep1_1785
chr16	20908984	20909084	G3_MNP_rep1_431,G3_MNP_rep2_984
chr16	21074504	21074593	G3_MNP_rep1_290,G3_MNP_rep2_191
chr16	21165958	21166094	G3_MNP_rep2_452,G3_MNP_rep1_341
chr16	21204522	21204643	G3_MNP_rep2_478,G3_MNP_rep1_999
chr16	21246026	21246671	G3_MNP_rep1_529,G3_MNP_rep2_185,G3_MNP_rep1_460
chr16	24454520	24454567	G3_MNP_rep1_298,G3_MNP_rep2_215
chr16	26185913	26186022	G3_MNP_rep1_928,G3_MNP_rep2_450
chr16	28841221	28841317	G3_MNP_rep2_428,G3_MNP_rep1_3203
chr16	29579388	29579549	G3_MNP_rep1_2819,G3_MNP_rep2_980
chr16	30008921	30009009	G3_MNP_rep2_378,G3_MNP_rep1_356
chr16	30068234	30068553	G3_MNP_rep1_2979,G3_MNP_rep2_1153
chr16	30190835	30191554	G3_MNP_rep2_381,G3_MNP_rep1_1730,G3_MNP_rep2_628,G3_MNP_rep1_907
chr16	30627499	30627627	G3_MNP_rep2_1039,G3_MNP_rep1_1091
chr16	32332640	32333116	G3_MNP_rep1_3331,G3_MNP_rep2_800
chr16	33251417	33251747	G3_MNP_rep2_569,G3_MNP_rep1_786
chr16	35302799	35303021	G3_MNP_rep1_2234,G3_MNP_rep2_606
chr16	36932165	36932276	G3_MNP_rep2_550,G3_MNP_rep1_974
chr16	37384885	37385022	G3_MNP_rep1_653,G3_MNP_rep2_342
chr16	43617440	43617512	G3_MNP_rep1_231,G3_MNP_rep2_154
chr16	45744399	45744529	G3_MNP_rep2_735,G3_MNP_rep1_2398
chr16	45830627	45830722	G3_MNP_rep1_1757,G3_MNP_rep2_742
chr16	57121463	57121631	G3_MNP_rep2_726,G3_MNP_rep1_1635
chr16	59639157	59639596	G3_MNP_rep1_3389,G3_MNP_rep2_156
chr16	76372286	76372583	G3_MNP_rep2_916,G3_MNP_rep1_1518
chr16	76680061	76680312	G3_MNP_rep1_2571,G3_MNP_rep2_1115
chr16	85680552	85680645	G3_MNP_rep2_387,G3_MNP_rep1_426
chr16	85800963	85801453	G3_MNP_rep2_252,G3_MNP_rep1_305
chr16	92927738	92927832	G3_MNP_rep2_1036,G3_MNP_rep1_943
chr16	94059888	94060064	G3_MNP_rep2_707,G3_MNP_rep1_1581
chr16	95093882	95093945	G3_MNP_rep2_144,G3_MNP_rep1_61
chr16	96126952	96127632	G3_MNP_rep2_621,G3_MNP_rep1_1110
chr17	5058487	5058532	G3_MNP_rep1_644,G3_MNP_rep2_314
chr17	15704396	15704715	G3_MNP_rep2_485,G3_MNP_rep1_1431
chr17	16218639	16218751	G3_MNP_rep2_597,G3_MNP_rep1_616
chr17	21801583	21801603	G3_MNP_rep1_40,G3_MNP_rep2_30
chr17	22230882	22230961	G3_MNP_rep2_43,G3_MNP_rep1_62
chr17	23599243	23599579	G3_MNP_rep2_1228,G3_MNP_rep1_2506
chr17	24209509	24209642	G3_MNP_rep2_113,G3_MNP_rep1_149
chr17	24529250	24529334	G3_MNP_rep2_740,G3_MNP_rep1_555
chr17	25272993	25273288	G3_MNP_rep1_235,G3_MNP_rep2_528
chr17	25828733	25829031	G3_MNP_rep2_867,G3_MNP_rep1_3528
chr17	29185361	29185801	G3_MNP_rep1_546,G3_MNP_rep2_287
chr17	29199499	29199668	G3_MNP_rep2_449,G3_MNP_rep1_590
chr17	29451084	29451255	G3_MNP_rep2_175,G3_MNP_rep1_327
chr17	29464080	29464332	G3_MNP_rep1_259,G3_MNP_rep2_153
chr17	29490060	29490206	G3_MNP_rep2_221,G3_MNP_rep1_277
chr17	33685005	33685126	G3_MNP_rep1_490,G3_MNP_rep2_573
chr17	34028072	34028167	G3_MNP_rep2_165,G3_MNP_rep1_250
chr17	34121303	34121724	G3_MNP_rep1_1708,G3_MNP_rep2_756
chr17	35135244	35135427	G3_MNP_rep1_1922,G3_MNP_rep2_1168
chr17	35241801	35242144	G3_MNP_rep1_658,G3_MNP_rep2_858
chr17	35270088	35270184	G3_MNP_rep1_691,G3_MNP_rep2_627
chr17	35837682	35838199	G3_MNP_rep2_1045,G3_MNP_rep1_1753
chr17	37045830	37045911	G3_MNP_rep2_470,G3_MNP_rep1_326
chr17	37046914	37047071	G3_MNP_rep2_825,G3_MNP_rep1_3160
chr17	39129270	39129300	G3_MNP_rep2_356,G3_MNP_rep1_221
chr17	43535051	43535141	G3_MNP_rep1_670,G3_MNP_rep2_416
chr17	44618288	44618420	G3_MNP_rep2_86,G3_MNP_rep1_116
chr17	45572890	45573156	G3_MNP_rep2_1046,G3_MNP_rep1_2323
chr17	45573809	45574052	G3_MNP_rep2_1234,G3_MNP_rep1_937
chr17	46030595	46031079	G3_MNP_rep1_1320,G3_MNP_rep2_813
chr17	56008265	56008337	G3_MNP_rep2_229,G3_MNP_rep1_400
chr17	56199973	56200043	G3_MNP_rep2_8,G3_MNP_rep1_6
chr17	56242076	56242214	G3_MNP_rep1_96,G3_MNP_rep2_102
chr17	57032104	57032276	G3_MNP_rep2_807,G3_MNP_rep1_2052
chr17	63499731	63500021	G3_MNP_rep1_471,G3_MNP_rep2_946
chr17	64802696	64802777	G3_MNP_rep2_265,G3_MNP_rep1_697
chr17	65839675	65839773	G3_MNP_rep1_1152,G3_MNP_rep2_343
chr17	65950731	65951110	G3_MNP_rep2_1086,G3_MNP_rep1_2568
chr17	66315489	66315677	G3_MNP_rep2_1044,G3_MNP_rep1_1229
chr17	69382851	69383148	G3_MNP_rep2_1156,G3_MNP_rep1_1987
chr17	71962893	71963101	G3_MNP_rep2_1081,G3_MNP_rep1_737
chr17	75004860	75004963	G3_MNP_rep2_969,G3_MNP_rep1_911
chr17	78562969	78563014	G3_MNP_rep1_1033,G3_MNP_rep2_329
chr17	80061241	80061803	G3_MNP_rep1_1318,G3_MNP_rep2_966
chr17	81393168	81393279	G3_MNP_rep1_840,G3_MNP_rep2_239
chr17	83010976	83011040	G3_MNP_rep2_211,G3_MNP_rep1_163
chr17	83633102	83633210	G3_MNP_rep1_2322,G3_MNP_rep2_1158
chr17	84028690	84028867	G3_MNP_rep1_1529,G3_MNP_rep2_1025
chr17	84688148	84688281	G3_MNP_rep2_375,G3_MNP_rep1_361
chr18	6491124	6491262	G3_MNP_rep1_1587,G3_MNP_rep2_1037
chr18	7869228	7869486	G3_MNP_rep1_1859,G3_MNP_rep2_1254
chr18	25500567	25500609	G3_MNP_rep2_163,G3_MNP_rep1_146
chr18	25668183	25668255	G3_MNP_rep2_12,G3_MNP_rep1_10
chr18	34382674	34383080	G3_MNP_rep2_584,G3_MNP_rep1_1567
chr18	34777044	34777317	G3_MNP_rep2_590,G3_MNP_rep1_330
chr18	35661870	35662104	G3_MNP_rep2_169,G3_MNP_rep1_176
chr18	36274717	36274940	G3_MNP_rep1_672,G3_MNP_rep2_162
chr18	37178446	37178690	G3_MNP_rep2_728,G3_MNP_rep1_556
chr18	38804541	38804689	G3_MNP_rep2_369,G3_MNP_rep1_528
chr18	46525333	46525775	G3_MNP_rep1_882,G3_MNP_rep2_1147
chr18	50229225	50229320	G3_MNP_rep2_196,G3_MNP_rep1_190
chr18	52409927	52410074	G3_MNP_rep1_286,G3_MNP_rep2_319
chr18	52827660	52827901	G3_MNP_rep2_494,G3_MNP_rep1_692
chr18	58659530	58659862	G3_MNP_rep2_978,G3_MNP_rep1_1201
chr18	64685027	64685113	G3_MNP_rep1_951,G3_MNP_rep2_361
chr18	67774774	67775238	G3_MNP_rep2_677,G3_MNP_rep1_1910
chr18	67800151	67800497	G3_MNP_rep1_1236,G3_MNP_rep2_1146
chr18	77732788	77733036	G3_MNP_rep2_1212,G3_MNP_rep1_2580
chr18	82418926	82418973	G3_MNP_rep2_95,G3_MNP_rep1_66
chr18	84768898	84768972	G3_MNP_rep2_522,G3_MNP_rep1_1286
chr18	88893779	88894263	G3_MNP_rep2_1075,G3_MNP_rep1_383
chr19	4989108	4989160	G3_MNP_rep2_4,G3_MNP_rep1_4
chr19	5071607	5071998	G3_MNP_rep1_577,G3_MNP_rep2_177
chr19	5823331	5823398	G3_MNP_rep2_59,G3_MNP_rep1_129
chr19	7129151	7129184	G3_MNP_rep2_484,G3_MNP_rep1_1856
chr19	9950567	9950729	G3_MNP_rep2_1171,G3_MNP_rep1_3293
chr19	10403256	10403305	G3_MNP_rep2_54,G3_MNP_rep1_50
chr19	10525271	10525640	G3_MNP_rep2_430,G3_MNP_rep1_162
chr19	14684458	14684591	G3_MNP_rep1_930,G3_MNP_rep2_367
chr19	28908320	28908432	G3_MNP_rep2_126,G3_MNP_rep1_204
chr19	37207565	37207920	G3_MNP_rep1_448,G3_MNP_rep2_538
chr19	42255986	42256020	G3_MNP_rep2_39,G3_MNP_rep1_70
chr19	46598751	46598938	G3_MNP_rep2_206,G3_MNP_rep1_295
chr19	47328204	47328284	G3_MNP_rep2_244,G3_MNP_rep1_527
chr19	57361263	57361461	G3_MNP_rep2_1240,G3_MNP_rep1_2689
chr19	60789932	60790671	G3_MNP_rep2_957,G3_MNP_rep1_587,G3_MNP_rep2_1282
chr2	5099320	5099433	G3_MNP_rep2_440,G3_MNP_rep1_2391
chr2	15055256	15055342	G3_MNP_rep1_284,G3_MNP_rep2_186
chr2	23291191	23291220	G3_MNP_rep1_32,G3_MNP_rep2_18
chr2	24919055	24919467	G3_MNP_rep2_914,G3_MNP_rep1_1659
chr2	25500860	25500991	G3_MNP_rep1_1084,G3_MNP_rep2_669
chr2	25982594	25982925	G3_MNP_rep1_721,G3_MNP_rep2_611
chr2	28916127	28916220	G3_MNP_rep2_752,G3_MNP_rep1_227
chr2	30707528	30707742	G3_MNP_rep2_753,G3_MNP_rep1_1426
chr2	30821734	30821781	G3_MNP_rep2_248,G3_MNP_rep1_251
chr2	31759923	31760178	G3_MNP_rep2_545,G3_MNP_rep1_255
chr2	32534949	32535065	G3_MNP_rep1_301,G3_MNP_rep2_250
chr2	32708599	32708813	G3_MNP_rep2_732,G3_MNP_rep1_297
chr2	33018181	33018223	G3_MNP_rep2_10,G3_MNP_rep1_7
chr2	34090707	34090763	G3_MNP_rep2_16,G3_MNP_rep1_8
chr2	34871089	34871249	G3_MNP_rep1_1846,G3_MNP_rep2_1247
chr2	38418092	38418143	G3_MNP_rep2_46,G3_MNP_rep1_29
chr2	39806850	39806888	G3_MNP_rep1_13,G3_MNP_rep2_9
chr2	50296446	50296768	G3_MNP_rep1_2036,G3_MNP_rep2_1266
chr2	51207762	51207875	G3_MNP_rep1_346,G3_MNP_rep2_253
chr2	58768967	58769150	G3_MNP_rep1_816,G3_MNP_rep2_692
chr2	58769386	58769546	G3_MNP_rep2_696,G3_MNP_rep1_997
chr2	59673958	59674141	G3_MNP_rep1_2175,G3_MNP_rep2_531
chr2	61453749	61453886	G3_MNP_rep2_1124,G3_MNP_rep1_1083
chr2	69722851	69722987	G3_MNP_rep2_693,G3_MNP_rep1_1526
chr2	69861623	69861987	G3_MNP_rep2_991,G3_MNP_rep1_2561
chr2	71172943	71173035	G3_MNP_rep2_737,G3_MNP_rep1_698
chr2	74825939	74825989	G3_MNP_rep2_1246,G3_MNP_rep1_3094
chr2	75494421	75494461	G3_MNP_rep1_966,G3_MNP_rep2_906
chr2	75659274	75659614	G3_MNP_rep2_658,G3_MNP_rep1_328
chr2	80704843	80704926	G3_MNP_rep1_464,G3_MNP_rep2_350
chr2	83724233	83724296	G3_MNP_rep1_1055,G3_MNP_rep2_589
chr2	84742808	84743160	G3_MNP_rep2_853,G3_MNP_rep1_345
chr2	85037286	85037391	G3_MNP_rep2_289,G3_MNP_rep1_342
chr2	90917316	90917686	G3_MNP_rep2_968,G3_MNP_rep1_640,G3_MNP_rep2_548
chr2	91526804	91527165	G3_MNP_rep2_1125,G3_MNP_rep1_668
chr2	93176957	93177049	G3_MNP_rep1_362,G3_MNP_rep2_483
chr2	94157536	94157803	G3_MNP_rep1_1165,G3_MNP_rep2_667
chr2	98330143	98330203	G3_MNP_rep2_73,G3_MNP_rep1_48
chr2	104711834	104712171	G3_MNP_rep1_826,G3_MNP_rep2_1123
chr2	110036335	110036479	G3_MNP_rep2_325,G3_MNP_rep1_695
chr2	112379210	112379585	G3_MNP_rep2_512,G3_MNP_rep1_470
chr2	119618676	119618763	G3_MNP_rep1_683,G3_MNP_rep2_566
chr2	125436321	125436407	G3_MNP_rep2_136,G3_MNP_rep1_402
chr2	130408316	130408418	G3_MNP_rep1_501,G3_MNP_rep2_274
chr2	131401886	131401949	G3_MNP_rep2_159,G3_MNP_rep1_278
chr2	132781720	132781894	G3_MNP_rep2_481,G3_MNP_rep1_1853
chr2	133635634	133635721	G3_MNP_rep2_411,G3_MNP_rep1_725
chr2	136714251	136714329	G3_MNP_rep2_199,G3_MNP_rep1_117
chr2	142232939	142233098	G3_MNP_rep2_174,G3_MNP_rep1_2081
chr2	146959370	146959413	G3_MNP_rep1_76,G3_MNP_rep2_66
chr2	147560297	147560552	G3_MNP_rep2_798,G3_MNP_rep1_1860
chr2	148206678	148206734	G3_MNP_rep2_247,G3_MNP_rep1_379
chr2	150749084	150749258	G3_MNP_rep2_535,G3_MNP_rep1_1219
chr2	152414389	152414762	G3_MNP_rep1_1086,G3_MNP_rep2_1095
chr2	152735255	152735351	G3_MNP_rep2_1274,G3_MNP_rep1_3021
chr2	152739006	152739181	G3_MNP_rep2_796,G3_MNP_rep1_671
chr2	152830835	152831195	G3_MNP_rep2_795,G3_MNP_rep1_439
chr2	153032359	153032404	G3_MNP_rep1_30,G3_MNP_rep2_29
chr2	154454656	154454764	G3_MNP_rep2_666,G3_MNP_rep1_967
chr2	155943754	155943810	G3_MNP_rep1_969,G3_MNP_rep2_306
chr2	156179643	156180127	G3_MNP_rep2_620,G3_MNP_rep1_293
chr2	156840970	156841594	G3_MNP_rep1_2838,G3_MNP_rep2_782,G3_MNP_rep1_472
chr2	157458578	157458734	G3_MNP_rep2_819,G3_MNP_rep1_1161
chr2	157514441	157514506	G3_MNP_rep1_596,G3_MNP_rep2_245
chr2	157560069	157560132	G3_MNP_rep1_445,G3_MNP_rep2_479
chr2	157913489	157913537	G3_MNP_rep2_27,G3_MNP_rep1_38
chr2	164862207	164862344	G3_MNP_rep2_210,G3_MNP_rep1_451
chr2	165857453	165857592	G3_MNP_rep2_94,G3_MNP_rep1_192
chr2	167563771	167563850	G3_MNP_rep1_824,G3_MNP_rep2_1041
chr2	167587019	167587177	G3_MNP_rep2_1092,G3_MNP_rep1_1346
chr2	172241146	172241216	G3_MNP_rep2_135,G3_MNP_rep1_99
chr2	172675166	172675249	G3_MNP_rep1_306,G3_MNP_rep2_188
chr2	174858904	174859035	G3_MNP_rep2_664,G3_MNP_rep1_847
chr2	179193768	179193883	G3_MNP_rep2_396,G3_MNP_rep1_248
chr2	179200661	179200730	G3_MNP_rep2_554,G3_MNP_rep1_158
chr2	180589633	180589838	G3_MNP_rep2_318,G3_MNP_rep1_228
chr3	9607894	9607960	G3_MNP_rep2_530,G3_MNP_rep1_1205
chr3	29983196	29983348	G3_MNP_rep2_445,G3_MNP_rep1_1468
chr3	30602344	30602567	G3_MNP_rep2_663,G3_MNP_rep1_868
chr3	30792851	30793020	G3_MNP_rep2_661,G3_MNP_rep1_2480
chr3	31061202	31061303	G3_MNP_rep2_639,G3_MNP_rep1_1465
chr3	34020094	34020295	G3_MNP_rep1_843,G3_MNP_rep2_785
chr3	39962390	39962598	G3_MNP_rep1_324,G3_MNP_rep2_235
chr3	52101994	52102037	G3_MNP_rep1_1352,G3_MNP_rep2_879
chr3	58576721	58576908	G3_MNP_rep2_516,G3_MNP_rep1_570
chr3	62507037	62507164	G3_MNP_rep2_446,G3_MNP_rep1_1829
chr3	66985616	66985998	G3_MNP_rep1_949,G3_MNP_rep2_656
chr3	69044181	69044216	G3_MNP_rep2_731,G3_MNP_rep1_412
chr3	86316983	86317134	G3_MNP_rep1_1360,G3_MNP_rep2_883
chr3	87885314	87885569	G3_MNP_rep2_727,G3_MNP_rep1_576
chr3	87905961	87906334	G3_MNP_rep2_943,G3_MNP_rep1_1102
chr3	88449544	88449772	G3_MNP_rep1_2500,G3_MNP_rep2_517
chr3	88510140	88510201	G3_MNP_rep1_380,G3_MNP_rep2_194
chr3	88531522	88531747	G3_MNP_rep1_954,G3_MNP_rep2_1218
chr3	89090764	89090887	G3_MNP_rep2_662,G3_MNP_rep1_844
chr3	89337558	89337687	G3_MNP_rep2_665,G3_MNP_rep1_665
chr3	89430195	89430228	G3_MNP_rep2_448,G3_MNP_rep1_329
chr3	90051973	90052171	G3_MNP_rep2_290,G3_MNP_rep1_199
chr3	90293332	90293726	G3_MNP_rep1_1273,G3_MNP_rep2_886
chr3	91213430	91213478	G3_MNP_rep2_230,G3_MNP_rep1_196
chr3	95315253	95315606	G3_MNP_rep1_318,G3_MNP_rep2_256
chr3	95624673	95624735	G3_MNP_rep1_497,G3_MNP_rep2_285
chr3	95658738	95658959	G3_MNP_rep2_266,G3_MNP_rep1_169
chr3	99266883	99267097	G3_MNP_rep1_3236,G3_MNP_rep2_668
chr3	101376818	101376875	G3_MNP_rep2_965,G3_MNP_rep1_3746
chr3	108911670	108911990	G3_MNP_rep1_2287,G3_MNP_rep2_788
chr3	110344908	110345058	G3_MNP_rep2_887,G3_MNP_rep1_1698
chr3	113091030	113091086	G3_MNP_rep2_7,G3_MNP_rep1_20
chr3	116662042	116662408	G3_MNP_rep1_524,G3_MNP_rep2_1050
chr3	122292918	122293154	G3_MNP_rep2_574,G3_MNP_rep1_575
chr3	122294090	122294266	G3_MNP_rep2_655,G3_MNP_rep1_450
chr3	122820803	122820912	G3_MNP_rep1_1943,G3_MNP_rep2_863
chr3	135857282	135857367	G3_MNP_rep2_650,G3_MNP_rep1_750
chr3	138443099	138443307	G3_MNP_rep1_4014,G3_MNP_rep2_988
chr3	143866661	143866730	G3_MNP_rep2_652,G3_MNP_rep1_1623
chr3	145118573	145118744	G3_MNP_rep1_492,G3_MNP_rep2_959
chr3	147531613	147531802	G3_MNP_rep1_1613,G3_MNP_rep2_377
chr3	148052670	148052744	G3_MNP_rep2_691,G3_MNP_rep1_1492
chr3	152109269	152109393	G3_MNP_rep2_401,G3_MNP_rep1_701
chr3	152210101	152210239	G3_MNP_rep1_1947,G3_MNP_rep2_864
chr3	154547726	154548205	G3_MNP_rep1_1406,G3_MNP_rep2_295
chr4	4148953	4149111	G3_MNP_rep1_957,G3_MNP_rep2_757
chr4	6453102	6453365	G3_MNP_rep1_3175,G3_MNP_rep2_758
chr4	8536056	8536251	G3_MNP_rep2_989,G3_MNP_rep1_686
chr4	11769518	11769615	G3_MNP_rep2_630,G3_MNP_rep1_1948
chr4	12089444	12089682	G3_MNP_rep2_828,G3_MNP_rep1_1186
chr4	12140281	12140665	G3_MNP_rep2_919,G3_MNP_rep1_1292
chr4	12171429	12171754	G3_MNP_rep1_245,G3_MNP_rep2_760
chr4	12642629	12642834	G3_MNP_rep1_565,G3_MNP_rep2_354
chr4	16163076	16163510	G3_MNP_rep2_501,G3_MNP_rep1_413
chr4	21712292	21712353	G3_MNP_rep2_93,G3_MNP_rep1_112
chr4	29331966	29332089	G3_MNP_rep1_184,G3_MNP_rep2_119
chr4	34882490	34882849	G3_MNP_rep1_2298,G3_MNP_rep2_1202
chr4	41135597	41136491	G3_MNP_rep1_1550,G3_MNP_rep2_579,G3_MNP_rep1_3762
chr4	42999729	42999972	G3_MNP_rep1_580,G3_MNP_rep2_762
chr4	54129144	54129342	G3_MNP_rep2_1055,G3_MNP_rep1_1334
chr4	63544873	63545030	G3_MNP_rep2_811,G3_MNP_rep1_636
chr4	72204846	72204946	G3_MNP_rep2_198,G3_MNP_rep1_156
chr4	81442407	81442757	G3_MNP_rep1_1154,G3_MNP_rep2_1024
chr4	83021211	83021313	G3_MNP_rep1_562,G3_MNP_rep2_226
chr4	87658553	87658677	G3_MNP_rep1_1674,G3_MNP_rep2_438
chr4	87768057	87768308	G3_MNP_rep1_265,G3_MNP_rep2_220
chr4	88722024	88722408	G3_MNP_rep2_497,G3_MNP_rep1_359
chr4	98623421	98623596	G3_MNP_rep2_917,G3_MNP_rep1_1816
chr4	99193916	99194058	G3_MNP_rep2_480,G3_MNP_rep1_1546
chr4	103875703	103875794	G3_MNP_rep1_1888,G3_MNP_rep2_362
chr4	106560720	106560876	G3_MNP_rep2_889,G3_MNP_rep1_3128
chr4	108363017	108363081	G3_MNP_rep1_249,G3_MNP_rep2_100
chr4	108780143	108780467	G3_MNP_rep2_588,G3_MNP_rep1_972
chr4	108989566	108989727	G3_MNP_rep2_180,G3_MNP_rep1_1027
chr4	114767116	114767297	G3_MNP_rep1_263,G3_MNP_rep2_236
chr4	114779416	114779545	G3_MNP_rep2_388,G3_MNP_rep1_407
chr4	114791835	114791882	G3_MNP_rep1_287,G3_MNP_rep2_1027
chr4	114821899	114821992	G3_MNP_rep2_32,G3_MNP_rep1_53
chr4	118289952	118290077	G3_MNP_rep2_915,G3_MNP_rep1_1103
chr4	119415493	119415615	G3_MNP_rep1_687,G3_MNP_rep2_600
chr4	120681078	120681132	G3_MNP_rep2_559,G3_MNP_rep1_837
chr4	122996997	122997062	G3_MNP_rep1_515,G3_MNP_rep2_317
chr4	123233485	123233605	G3_MNP_rep2_764,G3_MNP_rep1_751
chr4	125084719	125085095	G3_MNP_rep2_891,G3_MNP_rep1_203
chr4	126202828	126202912	G3_MNP_rep2_87,G3_MNP_rep1_102
chr4	126281616	126281693	G3_MNP_rep1_543,G3_MNP_rep2_493
chr4	126655475	126655523	G3_MNP_rep2_212,G3_MNP_rep1_171
chr4	127021294	127022181	G3_MNP_rep2_913,G3_MNP_rep2_1209,G3_MNP_rep1_256,G3_MNP_rep2_818
chr4	127173626	127173715	G3_MNP_rep2_124,G3_MNP_rep1_103
chr4	127620001	127620046	G3_MNP_rep1_42,G3_MNP_rep2_42
chr4	128804711	128804797	G3_MNP_rep1_733,G3_MNP_rep2_380
chr4	129048910	129048981	G3_MNP_rep1_2220,G3_MNP_rep2_1097
chr4	131115398	131115429	G3_MNP_rep2_48,G3_MNP_rep1_46
chr4	131873723	131873991	G3_MNP_rep1_1460,G3_MNP_rep2_1098
chr4	132211680	132211997	G3_MNP_rep1_189,G3_MNP_rep2_407
chr4	132269848	132270121	G3_MNP_rep1_288,G3_MNP_rep2_161
chr4	132422041	132422434	G3_MNP_rep1_1371,G3_MNP_rep2_1031
chr4	133967505	133967912	G3_MNP_rep1_885,G3_MNP_rep2_1284
chr4	134020774	134020801	G3_MNP_rep1_51,G3_MNP_rep2_90
chr4	135166456	135166585	G3_MNP_rep1_378,G3_MNP_rep2_218
chr4	136150777	136150959	G3_MNP_rep1_1190,G3_MNP_rep2_909
chr4	136151118	136151308	G3_MNP_rep2_637,G3_MNP_rep1_2325
chr4	136311051	136311413	G3_MNP_rep1_514,G3_MNP_rep2_837
chr4	136469771	136470106	G3_MNP_rep2_425,G3_MNP_rep1_717
chr4	136924670	136924713	G3_MNP_rep2_24,G3_MNP_rep1_22
chr4	137752357	137752491	G3_MNP_rep1_1168,G3_MNP_rep2_1261
chr4	137892847	137892892	G3_MNP_rep2_203,G3_MNP_rep1_1007
chr4	140030560	140030586	G3_MNP_rep2_166,G3_MNP_rep1_90
chr4	140259052	140259091	G3_MNP_rep1_15,G3_MNP_rep2_6
chr4	140283531	140283648	G3_MNP_rep2_767,G3_MNP_rep1_429
chr4	140439996	140440048	G3_MNP_rep1_177,G3_MNP_rep2_678
chr4	141139500	141139685	G3_MNP_rep2_1032,G3_MNP_rep1_1354
chr4	142622278	142622728	G3_MNP_rep2_643,G3_MNP_rep1_618
chr4	144894907	144894989	G3_MNP_rep2_462,G3_MNP_rep1_384
chr4	150914356	150914450	G3_MNP_rep2_49,G3_MNP_rep1_68
chr4	151107941	151108320	G3_MNP_rep2_768,G3_MNP_rep1_411
chr4	151289128	151289333	G3_MNP_rep1_123,G3_MNP_rep2_893
chr4	151604578	151604657	G3_MNP_rep2_21,G3_MNP_rep1_17
chr4	152434985	152435454	G3_MNP_rep1_433,G3_MNP_rep2_85
chr4	152799550	152799597	G3_MNP_rep1_83,G3_MNP_rep2_103
chr4	154422431	154422561	G3_MNP_rep2_272,G3_MNP_rep1_344
chr4	154652593	154652711	G3_MNP_rep2_738,G3_MNP_rep1_896
chr4	155491585	155491804	G3_MNP_rep1_756,G3_MNP_rep2_418
chr4	155859449	155859557	G3_MNP_rep2_41,G3_MNP_rep1_43
chr5	21353650	21353711	G3_MNP_rep1_858,G3_MNP_rep2_461
chr5	27737248	27737305	G3_MNP_rep2_107,G3_MNP_rep1_108
chr5	30921526	30921629	G3_MNP_rep1_791,G3_MNP_rep2_496
chr5	32459331	32459781	G3_MNP_rep1_1099,G3_MNP_rep2_1207
chr5	32611165	32611514	G3_MNP_rep2_1238,G3_MNP_rep1_2557
chr5	33438316	33438370	G3_MNP_rep1_75,G3_MNP_rep2_77
chr5	35156576	35156705	G3_MNP_rep1_2041,G3_MNP_rep2_894
chr5	36321590	36321768	G3_MNP_rep1_2618,G3_MNP_rep2_995
chr5	44686410	44686486	G3_MNP_rep1_449,G3_MNP_rep2_320
chr5	50122842	50123049	G3_MNP_rep1_2158,G3_MNP_rep2_257
chr5	64803506	64803818	G3_MNP_rep2_840,G3_MNP_rep1_2054
chr5	65697150	65697612	G3_MNP_rep2_558,G3_MNP_rep1_718
chr5	73292794	73293009	G3_MNP_rep1_3409,G3_MNP_rep2_937
chr5	77065207	77065309	G3_MNP_rep2_351,G3_MNP_rep1_2615
chr5	86067552	86067669	G3_MNP_rep2_936,G3_MNP_rep1_1766
chr5	92915372	92915540	G3_MNP_rep1_3016,G3_MNP_rep2_935
chr5	98167463	98167605	G3_MNP_rep2_128,G3_MNP_rep1_97
chr5	99191083	99191364	G3_MNP_rep2_555,G3_MNP_rep1_4129
chr5	100038532	100038835	G3_MNP_rep2_686,G3_MNP_rep1_3234
chr5	102069521	102069822	G3_MNP_rep2_1090,G3_MNP_rep1_1539
chr5	103950242	103950380	G3_MNP_rep2_842,G3_MNP_rep1_769
chr5	105876759	105876964	G3_MNP_rep1_320,G3_MNP_rep2_553
chr5	110879609	110879655	G3_MNP_rep1_93,G3_MNP_rep2_105
chr5	112718772	112718833	G3_MNP_rep2_40,G3_MNP_rep1_45
chr5	113716646	113716763	G3_MNP_rep2_1038,G3_MNP_rep1_1429
chr5	113800130	113800554	G3_MNP_rep2_703,G3_MNP_rep1_386
chr5	114558602	114558710	G3_MNP_rep1_375,G3_MNP_rep2_197
chr5	115301097	115301205	G3_MNP_rep2_61,G3_MNP_rep1_88
chr5	116591468	116591606	G3_MNP_rep1_2961,G3_MNP_rep2_1135
chr5	117635900	117636043	G3_MNP_rep2_459,G3_MNP_rep1_2324
chr5	121078669	121078720	G3_MNP_rep2_51,G3_MNP_rep1_47
chr5	121712383	121712719	G3_MNP_rep2_1069,G3_MNP_rep1_626
chr5	123344102	123344638	G3_MNP_rep2_1106,G3_MNP_rep1_1447,G3_MNP_rep2_457
chr5	124552708	124552806	G3_MNP_rep2_389,G3_MNP_rep1_989
chr5	125110862	125110934	G3_MNP_rep1_1280,G3_MNP_rep2_441
chr5	125177467	125177686	G3_MNP_rep2_1104,G3_MNP_rep1_703
chr5	125179237	125179573	G3_MNP_rep1_473,G3_MNP_rep2_279
chr5	125184953	125185077	G3_MNP_rep2_111,G3_MNP_rep1_168
chr5	128581516	128581722	G3_MNP_rep2_896,G3_MNP_rep1_2222
chr5	134445856	134446158	G3_MNP_rep2_711,G3_MNP_rep1_1272
chr5	134455596	134455765	G3_MNP_rep2_224,G3_MNP_rep1_376
chr5	134455996	134456339	G3_MNP_rep2_618,G3_MNP_rep1_321
chr5	134638899	134639212	G3_MNP_rep2_488,G3_MNP_rep1_142
chr5	136861372	136861580	G3_MNP_rep2_1136,G3_MNP_rep1_2075
chr5	137611235	137611397	G3_MNP_rep2_844,G3_MNP_rep1_2541
chr5	139724684	139724785	G3_MNP_rep2_104,G3_MNP_rep1_101
chr5	140411452	140411516	G3_MNP_rep1_939,G3_MNP_rep2_625
chr5	142906313	142906625	G3_MNP_rep2_773,G3_MNP_rep1_447
chr5	143001117	143001197	G3_MNP_rep2_713,G3_MNP_rep1_1755
chr5	143527591	143527728	G3_MNP_rep1_938,G3_MNP_rep2_672
chr5	144767920	144768061	G3_MNP_rep1_568,G3_MNP_rep2_310
chr5	145140084	145140209	G3_MNP_rep2_486,G3_MNP_rep1_1060
chr5	148591389	148591499	G3_MNP_rep2_671,G3_MNP_rep1_897
chr5	149052449	149052785	G3_MNP_rep1_2611,G3_MNP_rep2_1199
chr5	149183873	149184147	G3_MNP_rep2_845,G3_MNP_rep1_2610
chr5	149228628	149229029	G3_MNP_rep1_2004,G3_MNP_rep2_321
chr6	6159543	6159655	G3_MNP_rep2_701,G3_MNP_rep1_3418
chr6	6578170	6578549	G3_MNP_rep1_488,G3_MNP_rep2_1000
chr6	6875106	6875323	G3_MNP_rep1_1308,G3_MNP_rep2_267
chr6	8209284	8209528	G3_MNP_rep1_2253,G3_MNP_rep2_1138
chr6	22003313	22003403	G3_MNP_rep2_778,G3_MNP_rep1_2963
chr6	29718995	29719091	G3_MNP_rep2_398,G3_MNP_rep1_494
chr6	30047925	30048497	G3_MNP_rep1_1145,G3_MNP_rep2_1175
chr6	31398819	31399046	G3_MNP_rep1_486,G3_MNP_rep2_539
chr6	35133420	35133671	G3_MNP_rep1_2343,G3_MNP_rep2_358
chr6	35539447	35539693	G3_MNP_rep2_846,G3_MNP_rep1_611
chr6	47650793	47651235	G3_MNP_rep1_157,G3_MNP_rep2_141
chr6	47659347	47659539	G3_MNP_rep2_774,G3_MNP_rep1_355
chr6	47663519	47663743	G3_MNP_rep2_1064,G3_MNP_rep1_310
chr6	47672307	47672492	G3_MNP_rep2_1177,G3_MNP_rep1_333
chr6	47676647	47676730	G3_MNP_rep1_281,G3_MNP_rep2_1216
chr6	47680981	47681161	G3_MNP_rep2_1063,G3_MNP_rep1_421
chr6	47685321	47685471	G3_MNP_rep2_839,G3_MNP_rep1_397
chr6	47739936	47740129	G3_MNP_rep2_490,G3_MNP_rep1_254
chr6	47744171	47744565	G3_MNP_rep2_739,G3_MNP_rep1_252
chr6	47748841	47749160	G3_MNP_rep2_1139,G3_MNP_rep1_1136
chr6	47752669	47753241	G3_MNP_rep2_683,G3_MNP_rep2_482,G3_MNP_rep1_262
chr6	47763083	47763525	G3_MNP_rep2_675,G3_MNP_rep1_335
chr6	47772131	47772731	G3_MNP_rep2_926,G3_MNP_rep1_713,G3_MNP_rep1_2977
chr6	49215320	49215483	G3_MNP_rep1_425,G3_MNP_rep2_601
chr6	51470652	51470965	G3_MNP_rep2_1141,G3_MNP_rep1_641
chr6	53568959	53569079	G3_MNP_rep2_477,G3_MNP_rep1_1892
chr6	54992765	54992982	G3_MNP_rep2_1219,G3_MNP_rep1_1772
chr6	55108466	55108572	G3_MNP_rep2_115,G3_MNP_rep1_82
chr6	58330839	58330895	G3_MNP_rep2_60,G3_MNP_rep1_87
chr6	71544139	71544329	G3_MNP_rep1_458,G3_MNP_rep2_613
chr6	72235379	72235507	G3_MNP_rep2_925,G3_MNP_rep1_427
chr6	72439552	72439794	G3_MNP_rep1_367,G3_MNP_rep2_346
chr6	72898839	72898972	G3_MNP_rep1_457,G3_MNP_rep2_856
chr6	72899189	72899484	G3_MNP_rep1_489,G3_MNP_rep2_1060
chr6	72958134	72958317	G3_MNP_rep2_1208,G3_MNP_rep1_2182
chr6	86404338	86404620	G3_MNP_rep2_1210,G3_MNP_rep1_679
chr6	87850455	87850787	G3_MNP_rep1_183,G3_MNP_rep2_271
chr6	89361945	89362122	G3_MNP_rep2_586,G3_MNP_rep1_1021
chr6	90737461	90737548	G3_MNP_rep2_421,G3_MNP_rep1_272
chr6	101296373	101296492	G3_MNP_rep1_1121,G3_MNP_rep2_410
chr6	103314601	103314648	G3_MNP_rep2_38,G3_MNP_rep1_663
chr6	113193844	113193928	G3_MNP_rep2_204,G3_MNP_rep1_127
chr6	113531416	113531624	G3_MNP_rep2_729,G3_MNP_rep1_1063
chr6	113852464	113852537	G3_MNP_rep1_89,G3_MNP_rep2_81
chr6	116207936	116208050	G3_MNP_rep2_101,G3_MNP_rep1_105
chr6	116628729	116628921	G3_MNP_rep2_1253,G3_MNP_rep1_583
chr6	117431463	117431604	G3_MNP_rep2_259,G3_MNP_rep1_855
chr6	117716495	117716764	G3_MNP_rep1_1694,G3_MNP_rep2_1001
chr6	119489875	119490051	G3_MNP_rep1_283,G3_MNP_rep2_200
chr6	120822526	120822722	G3_MNP_rep2_523,G3_MNP_rep1_988
chr6	121473180	121473247	G3_MNP_rep2_57,G3_MNP_rep1_39
chr6	126002995	126003062	G3_MNP_rep2_31,G3_MNP_rep1_80
chr6	127050939	127051040	G3_MNP_rep2_451,G3_MNP_rep1_764
chr6	127153274	127153343	G3_MNP_rep2_96,G3_MNP_rep1_151
chr6	127251110	127251218	G3_MNP_rep1_962,G3_MNP_rep2_386
chr6	127767892	127768073	G3_MNP_rep1_706,G3_MNP_rep2_1085
chr6	132463713	132463762	G3_MNP_rep2_442,G3_MNP_rep1_28
chr6	136519130	136519408	G3_MNP_rep1_2865,G3_MNP_rep2_570
chr6	136827775	136828049	G3_MNP_rep2_464,G3_MNP_rep1_538
chr6	145865592	145865679	G3_MNP_rep1_313,G3_MNP_rep2_848
chr6	146577935	146578236	G3_MNP_rep1_1137,G3_MNP_rep2_932
chr6	147953244	147953397	G3_MNP_rep2_595,G3_MNP_rep1_3729
chr7	4178568	4178696	G3_MNP_rep2_379,G3_MNP_rep1_242
chr7	6410194	6410241	G3_MNP_rep2_20,G3_MNP_rep1_19
chr7	7080936	7081047	G3_MNP_rep1_126,G3_MNP_rep2_67
chr7	12478326	12478765	G3_MNP_rep2_1278,G3_MNP_rep1_738
chr7	19770531	19770722	G3_MNP_rep2_392,G3_MNP_rep1_353
chr7	24359401	24359441	G3_MNP_rep2_75,G3_MNP_rep1_44
chr7	24686906	24686962	G3_MNP_rep2_754,G3_MNP_rep1_660
chr7	26489641	26489711	G3_MNP_rep2_52,G3_MNP_rep1_71
chr7	28148250	28148545	G3_MNP_rep2_568,G3_MNP_rep1_1106
chr7	29411334	29411426	G3_MNP_rep2_543,G3_MNP_rep1_584
chr7	30143466	30143670	G3_MNP_rep2_695,G3_MNP_rep1_4051
chr7	30533164	30533240	G3_MNP_rep1_498,G3_MNP_rep2_376
chr7	31150629	31151022	G3_MNP_rep2_1096,G3_MNP_rep1_841,G3_MNP_rep2_670
chr7	31455805	31455945	G3_MNP_rep2_902,G3_MNP_rep1_322
chr7	33543554	33543676	G3_MNP_rep2_281,G3_MNP_rep1_360
chr7	33836686	33836849	G3_MNP_rep2_1179,G3_MNP_rep1_649
chr7	38061210	38061267	G3_MNP_rep1_104,G3_MNP_rep2_260
chr7	44351156	44351406	G3_MNP_rep2_209,G3_MNP_rep1_188
chr7	44604514	44604607	G3_MNP_rep2_114,G3_MNP_rep1_144
chr7	44770146	44770230	G3_MNP_rep2_83,G3_MNP_rep1_73
chr7	44869277	44869447	G3_MNP_rep1_1148,G3_MNP_rep2_1028
chr7	45395281	45395618	G3_MNP_rep2_977,G3_MNP_rep1_1100
chr7	55850426	55850533	G3_MNP_rep1_585,G3_MNP_rep2_437
chr7	60974248	60974355	G3_MNP_rep2_296,G3_MNP_rep1_455
chr7	64839842	64839907	G3_MNP_rep2_349,G3_MNP_rep1_2061
chr7	66840582	66840640	G3_MNP_rep1_788,G3_MNP_rep2_475
chr7	68858715	68858808	G3_MNP_rep1_505,G3_MNP_rep2_242
chr7	75436115	75436556	G3_MNP_rep2_311,G3_MNP_rep1_551
chr7	75455576	75455861	G3_MNP_rep2_455,G3_MNP_rep1_1114
chr7	81198627	81198737	G3_MNP_rep2_945,G3_MNP_rep1_1891
chr7	81933898	81934273	G3_MNP_rep1_3597,G3_MNP_rep2_1150
chr7	83814155	83814401	G3_MNP_rep1_3831,G3_MNP_rep2_717
chr7	90442811	90442950	G3_MNP_rep1_381,G3_MNP_rep2_500
chr7	99534184	99534395	G3_MNP_rep2_571,G3_MNP_rep1_261
chr7	99632430	99632494	G3_MNP_rep1_2538,G3_MNP_rep2_1250
chr7	109519210	109519358	G3_MNP_rep1_1914,G3_MNP_rep2_903
chr7	110701771	110701841	G3_MNP_rep2_715,G3_MNP_rep1_266
chr7	111082310	111082640	G3_MNP_rep2_291,G3_MNP_rep1_510
chr7	112023551	112023746	G3_MNP_rep2_714,G3_MNP_rep1_299
chr7	116093338	116093518	G3_MNP_rep1_481,G3_MNP_rep2_536
chr7	121034500	121034964	G3_MNP_rep2_797,G3_MNP_rep1_446,G3_MNP_rep2_1042
chr7	122670906	122670981	G3_MNP_rep2_277,G3_MNP_rep1_208
chr7	122970254	122970470	G3_MNP_rep2_473,G3_MNP_rep1_150
chr7	123123891	123124061	G3_MNP_rep2_1217,G3_MNP_rep1_2832
chr7	126502662	126503108	G3_MNP_rep2_373,G3_MNP_rep1_2216,G3_MNP_rep2_616
chr7	127448648	127449126	G3_MNP_rep2_1040,G3_MNP_rep1_4212
chr7	127512031	127512305	G3_MNP_rep1_2073,G3_MNP_rep2_1249
chr7	138084039	138084157	G3_MNP_rep1_302,G3_MNP_rep2_276
chr7	139299568	139299606	G3_MNP_rep1_37,G3_MNP_rep2_23
chr7	140844938	140845076	G3_MNP_rep1_821,G3_MNP_rep2_382
chr7	141228807	141228953	G3_MNP_rep2_676,G3_MNP_rep1_819
chr7	142321888	142322065	G3_MNP_rep2_131,G3_MNP_rep1_280
chr7	142611288	142611345	G3_MNP_rep2_1269,G3_MNP_rep1_2409
chr7	143158715	143158858	G3_MNP_rep1_4377,G3_MNP_rep2_602
chr8	4324649	4324895	G3_MNP_rep1_396,G3_MNP_rep2_300
chr8	9635379	9635412	G3_MNP_rep2_213,G3_MNP_rep1_106
chr8	10255882	10255945	G3_MNP_rep2_406,G3_MNP_rep1_478
chr8	11009143	11009231	G3_MNP_rep1_325,G3_MNP_rep2_322
chr8	14072680	14072740	G3_MNP_rep1_11,G3_MNP_rep2_15
chr8	19784677	19784981	G3_MNP_rep2_108,G3_MNP_rep1_49
chr8	19788234	19788387	G3_MNP_rep2_288,G3_MNP_rep1_739
chr8	20122406	20122711	G3_MNP_rep2_92,G3_MNP_rep1_94
chr8	20125856	20125980	G3_MNP_rep2_397,G3_MNP_rep1_1386
chr8	20293747	20293850	G3_MNP_rep2_557,G3_MNP_rep1_1289
chr8	20297001	20297302	G3_MNP_rep1_174,G3_MNP_rep2_171
chr8	20420948	20421115	G3_MNP_rep2_433,G3_MNP_rep1_777
chr8	20424374	20424563	G3_MNP_rep1_121,G3_MNP_rep2_155
chr8	20550254	20550761	G3_MNP_rep1_124,G3_MNP_rep2_282,G3_MNP_rep2_207
chr8	20553797	20553939	G3_MNP_rep2_323,G3_MNP_rep1_898
chr8	25993366	25993458	G3_MNP_rep2_838,G3_MNP_rep1_2851
chr8	27042412	27042704	G3_MNP_rep2_961,G3_MNP_rep1_2971
chr8	31112077	31112676	G3_MNP_rep2_1079,G3_MNP_rep1_3747
chr8	36532663	36532710	G3_MNP_rep1_1838,G3_MNP_rep2_561
chr8	44996597	44996748	G3_MNP_rep2_302,G3_MNP_rep1_712
chr8	46551587	46551829	G3_MNP_rep2_769,G3_MNP_rep1_2406
chr8	60632978	60633135	G3_MNP_rep1_3929,G3_MNP_rep2_1251
chr8	70893706	70893787	G3_MNP_rep2_419,G3_MNP_rep1_186
chr8	74993664	74993882	G3_MNP_rep2_495,G3_MNP_rep1_296
chr8	78508454	78508621	G3_MNP_rep2_330,G3_MNP_rep1_348
chr8	80314879	80314961	G3_MNP_rep1_237,G3_MNP_rep2_138
chr8	80318471	80318695	G3_MNP_rep2_640,G3_MNP_rep1_654
chr8	80959705	80959763	G3_MNP_rep1_1867,G3_MNP_rep2_822
chr8	83662337	83662456	G3_MNP_rep1_119,G3_MNP_rep2_146
chr8	84656133	84656247	G3_MNP_rep2_45,G3_MNP_rep1_77
chr8	84742294	84742798	G3_MNP_rep1_851,G3_MNP_rep2_734
chr8	84947286	84947333	G3_MNP_rep2_34,G3_MNP_rep1_34
chr8	84969628	84969826	G3_MNP_rep2_821,G3_MNP_rep1_1053
chr8	87959181	87959328	G3_MNP_rep1_1728,G3_MNP_rep2_1057
chr8	91313507	91313642	G3_MNP_rep2_1214,G3_MNP_rep1_802
chr8	93469801	93469873	G3_MNP_rep2_58,G3_MNP_rep1_54
chr8	95331445	95331755	G3_MNP_rep1_1619,G3_MNP_rep2_900
chr8	102689238	102689324	G3_MNP_rep1_1129,G3_MNP_rep2_404
chr8	104386724	104386873	G3_MNP_rep2_938,G3_MNP_rep1_1133
chr8	105900497	105900649	G3_MNP_rep2_1213,G3_MNP_rep1_1194
chr8	105967101	105967181	G3_MNP_rep2_140,G3_MNP_rep1_240
chr8	112128959	112129044	G3_MNP_rep1_366,G3_MNP_rep2_763
chr8	114363775	114363856	G3_MNP_rep2_898,G3_MNP_rep1_1719
chr8	120291227	120291319	G3_MNP_rep2_1003,G3_MNP_rep1_1276
chr8	120537009	120537169	G3_MNP_rep2_297,G3_MNP_rep1_1196
chr8	120860866	120861019	G3_MNP_rep2_467,G3_MNP_rep1_3711
chr8	120899075	120899248	G3_MNP_rep2_275,G3_MNP_rep1_545
chr8	120912542	120912735	G3_MNP_rep2_1004,G3_MNP_rep1_1268
chr8	121080775	121080894	G3_MNP_rep2_249,G3_MNP_rep1_901
chr8	121127481	121127651	G3_MNP_rep1_2502,G3_MNP_rep2_383
chr8	121294080	121294477	G3_MNP_rep2_833,G3_MNP_rep1_903
chr8	121301105	121301223	G3_MNP_rep2_53,G3_MNP_rep1_111
chr8	123543860	123543948	G3_MNP_rep1_2360,G3_MNP_rep2_1264
chr8	123545585	123545639	G3_MNP_rep2_1270,G3_MNP_rep1_3458
chr8	123555789	123555844	G3_MNP_rep2_690,G3_MNP_rep1_2505
chr8	123557466	123557541	G3_MNP_rep1_3950,G3_MNP_rep2_832
chr8	123560866	123560990	G3_MNP_rep2_1183,G3_MNP_rep1_2706
chr8	123586244	123586297	G3_MNP_rep1_2025,G3_MNP_rep2_1140
chr8	123596486	123596525	G3_MNP_rep2_1211,G3_MNP_rep1_1982
chr8	123601571	123601637	G3_MNP_rep2_831,G3_MNP_rep1_1010
chr8	123615094	123615194	G3_MNP_rep1_1329,G3_MNP_rep2_1185
chr8	127064054	127064825	G3_MNP_rep2_1189,G3_MNP_rep1_4077,G3_MNP_rep1_572,G3_MNP_rep2_697
chr8	128685984	128686285	G3_MNP_rep2_624,G3_MNP_rep1_664
chr9	4138971	4139014	G3_MNP_rep1_26,G3_MNP_rep2_17
chr9	13749231	13749412	G3_MNP_rep2_576,G3_MNP_rep1_1646
chr9	15357483	15357630	G3_MNP_rep2_829,G3_MNP_rep1_482
chr9	20857239	20857293	G3_MNP_rep2_68,G3_MNP_rep1_58
chr9	21950462	21950517	G3_MNP_rep2_2,G3_MNP_rep1_3
chr9	22071049	22071204	G3_MNP_rep1_2248,G3_MNP_rep2_1067
chr9	30354103	30354243	G3_MNP_rep1_2694,G3_MNP_rep2_1204
chr9	37030354	37030483	G3_MNP_rep2_278,G3_MNP_rep1_202
chr9	38413656	38413708	G3_MNP_rep2_78,G3_MNP_rep1_63
chr9	40456444	40456574	G3_MNP_rep1_709,G3_MNP_rep2_167
chr9	40801249	40801553	G3_MNP_rep2_895,G3_MNP_rep1_790
chr9	41582272	41582731	G3_MNP_rep1_3193,G3_MNP_rep2_1190
chr9	43261625	43261731	G3_MNP_rep2_269,G3_MNP_rep1_589
chr9	43989125	43989283	G3_MNP_rep2_1169,G3_MNP_rep1_2048
chr9	43993305	43993362	G3_MNP_rep2_122,G3_MNP_rep1_309
chr9	44305858	44305984	G3_MNP_rep1_3581,G3_MNP_rep2_1116
chr9	44605027	44605305	G3_MNP_rep1_1281,G3_MNP_rep2_1229
chr9	44881310	44881508	G3_MNP_rep2_1006,G3_MNP_rep1_559
chr9	45984425	45984520	G3_MNP_rep1_516,G3_MNP_rep2_911
chr9	47286968	47287145	G3_MNP_rep2_181,G3_MNP_rep1_206
chr9	50775364	50775648	G3_MNP_rep2_364,G3_MNP_rep1_220
chr9	52048408	52048646	G3_MNP_rep1_746,G3_MNP_rep2_1164
chr9	54631818	54632011	G3_MNP_rep2_1162,G3_MNP_rep1_1897
chr9	56160524	56160880	G3_MNP_rep1_731,G3_MNP_rep2_1007
chr9	57764847	57765043	G3_MNP_rep2_623,G3_MNP_rep1_499
chr9	57765227	57765369	G3_MNP_rep2_580,G3_MNP_rep1_755
chr9	58372631	58372701	G3_MNP_rep1_358,G3_MNP_rep2_258
chr9	59485749	59486002	G3_MNP_rep2_861,G3_MNP_rep1_1564
chr9	59750661	59750737	G3_MNP_rep1_3059,G3_MNP_rep2_525
chr9	60793977	60794554	G3_MNP_rep1_592,G3_MNP_rep1_973,G3_MNP_rep2_402
chr9	60948598	60948749	G3_MNP_rep1_1256,G3_MNP_rep2_648
chr9	61136472	61136583	G3_MNP_rep1_2057,G3_MNP_rep2_720
chr9	61372392	61372693	G3_MNP_rep1_456,G3_MNP_rep2_1009,G3_MNP_rep2_1272
chr9	61689714	61689810	G3_MNP_rep1_1408,G3_MNP_rep2_1113
chr9	64340908	64341158	G3_MNP_rep1_373,G3_MNP_rep2_415
chr9	66307448	66307542	G3_MNP_rep2_261,G3_MNP_rep1_133
chr9	70542886	70543306	G3_MNP_rep1_656,G3_MNP_rep2_1159
chr9	71485502	71485873	G3_MNP_rep2_660,G3_MNP_rep1_655
chr9	72662492	72662912	G3_MNP_rep1_334,G3_MNP_rep2_348
chr9	73103616	73103720	G3_MNP_rep1_131,G3_MNP_rep2_142
chr9	77910776	77910967	G3_MNP_rep2_1010,G3_MNP_rep1_443
chr9	78481067	78481611	G3_MNP_rep1_801,G3_MNP_rep2_1070
chr9	80067090	80067497	G3_MNP_rep2_540,G3_MNP_rep1_247
chr9	87021777	87021821	G3_MNP_rep1_56,G3_MNP_rep2_65
chr9	97110625	97111054	G3_MNP_rep2_653,G3_MNP_rep1_523
chr9	99218400	99218479	G3_MNP_rep2_447,G3_MNP_rep1_166
chr9	101074072	101074364	G3_MNP_rep1_889,G3_MNP_rep2_923
chr9	102531166	102531256	G3_MNP_rep2_214,G3_MNP_rep1_179
chr9	103305211	103305606	G3_MNP_rep2_784,G3_MNP_rep1_1936
chr9	103386572	103386797	G3_MNP_rep2_638,G3_MNP_rep1_1039
chr9	106202873	106202976	G3_MNP_rep2_192,G3_MNP_rep1_239
chr9	106885424	106885663	G3_MNP_rep2_336,G3_MNP_rep1_722
chr9	108578218	108578804	G3_MNP_rep1_631,G3_MNP_rep2_435,G3_MNP_rep1_809
chr9	108826984	108827042	G3_MNP_rep2_69,G3_MNP_rep1_31
chr9	110116942	110117648	G3_MNP_rep2_429,G3_MNP_rep2_405,G3_MNP_rep1_459
chr9	110304620	110304718	G3_MNP_rep2_332,G3_MNP_rep1_246
chr9	110532945	110533226	G3_MNP_rep1_243,G3_MNP_rep2_1011,G3_MNP_rep2_355
chr9	114798841	114799052	G3_MNP_rep2_372,G3_MNP_rep1_3070
chr9	114933935	114934075	G3_MNP_rep1_257,G3_MNP_rep2_783
chr9	118506449	118506821	G3_MNP_rep2_1186,G3_MNP_rep1_1969
chr9	119402685	119403104	G3_MNP_rep2_1157,G3_MNP_rep1_1076
chrM	9424	9811	G3_MNP_rep2_33,G3_MNP_rep1_198
chrX	15963121	15963164	G3_MNP_rep1_270,G3_MNP_rep2_233
chrX	48124769	48124897	G3_MNP_rep1_1170,G3_MNP_rep2_370
chrX	52627053	52627147	G3_MNP_rep2_374,G3_MNP_rep1_316
chrX	69254929	69255136	G3_MNP_rep2_1268,G3_MNP_rep1_2178
chrX	73869466	73869552	G3_MNP_rep1_79,G3_MNP_rep2_62
chrX	77510376	77510494	G3_MNP_rep2_1029,G3_MNP_rep1_1263
chrX	94122732	94122894	G3_MNP_rep2_238,G3_MNP_rep1_173
chrX	101429659	101430034	G3_MNP_rep2_743,G3_MNP_rep1_1328
chrX	111697035	111697139	G3_MNP_rep1_140,G3_MNP_rep2_13
chrX	137038148	137038381	G3_MNP_rep2_182,G3_MNP_rep1_193
chrX	147639716	147639848	G3_MNP_rep2_187,G3_MNP_rep1_222
chrY	259116	259133	G3_MNP_rep1_1040,G3_MNP_rep2_312
chrY	11858082	11858259	G3_MNP_rep2_1061,G3_MNP_rep1_894

## Sheet: E11.5_Hand2FLAG_MNP_rep1_2_shar
chr1	3191785	3191972	Hand2_rep2_9906,Hand2_rep1_5812
chr1	6287539	6287724	Hand2_rep2_10219,Hand2_rep1_11784
chr1	6406186	6406258	Hand2_rep2_6988,Hand2_rep1_8869
chr1	7423710	7423843	Hand2_rep1_7463,Hand2_rep2_4831
chr1	7430193	7430305	Hand2_rep2_2060,Hand2_rep1_1465
chr1	7971085	7971456	Hand2_rep2_9531,Hand2_rep1_5242
chr1	9577889	9578035	Hand2_rep2_8066,Hand2_rep1_9252
chr1	9756249	9756314	Hand2_rep2_10926,Hand2_rep1_5800
chr1	10011986	10012173	Hand2_rep2_17208,Hand2_rep1_16296
chr1	10018506	10018595	Hand2_rep1_15471,Hand2_rep2_10169
chr1	10019239	10019390	Hand2_rep2_4544,Hand2_rep1_5824
chr1	10348640	10348726	Hand2_rep2_2797,Hand2_rep1_3554
chr1	10710176	10710294	Hand2_rep2_1794,Hand2_rep1_1930
chr1	10717226	10717390	Hand2_rep2_9013,Hand2_rep1_10693
chr1	10841824	10841965	Hand2_rep2_8828,Hand2_rep1_11538
chr1	11246077	11246110	Hand2_rep2_3197,Hand2_rep1_4926
chr1	11355478	11355661	Hand2_rep1_7604,Hand2_rep2_5235
chr1	11845575	11845661	Hand2_rep1_16276,Hand2_rep2_11916
chr1	11996747	11996969	Hand2_rep2_9404,Hand2_rep1_21011
chr1	12029550	12029890	Hand2_rep1_14806,Hand2_rep2_9690
chr1	12032699	12032866	Hand2_rep2_2326,Hand2_rep1_2364
chr1	12054187	12054406	Hand2_rep1_10814,Hand2_rep2_18084
chr1	12285639	12285758	Hand2_rep2_1035,Hand2_rep1_1174
chr1	12505209	12505359	Hand2_rep2_14437,Hand2_rep1_11803
chr1	12525736	12525926	Hand2_rep2_5326,Hand2_rep1_5144
chr1	12526320	12526401	Hand2_rep2_8300,Hand2_rep1_16325
chr1	12566919	12567105	Hand2_rep2_14741,Hand2_rep1_14169
chr1	12577081	12577166	Hand2_rep2_411,Hand2_rep1_193
chr1	12583319	12583604	Hand2_rep1_7153,Hand2_rep2_5183
chr1	12814772	12814948	Hand2_rep2_7490,Hand2_rep1_8399
chr1	12846086	12846152	Hand2_rep2_3158,Hand2_rep1_3202
chr1	12950617	12950836	Hand2_rep1_9066,Hand2_rep2_9522
chr1	13092357	13092554	Hand2_rep2_7421,Hand2_rep1_10286
chr1	13204793	13205068	Hand2_rep2_7624,Hand2_rep1_4760
chr1	13224872	13224980	Hand2_rep1_11494,Hand2_rep2_16158
chr1	13287498	13287652	Hand2_rep1_8483,Hand2_rep2_13202
chr1	13329486	13330060	Hand2_rep1_17444,Hand2_rep2_10492,Hand2_rep1_18472
chr1	13337027	13337195	Hand2_rep2_10915,Hand2_rep1_20011
chr1	13340667	13340851	Hand2_rep1_7328,Hand2_rep2_9534
chr1	13385346	13385434	Hand2_rep1_3666,Hand2_rep2_3023
chr1	13604598	13604888	Hand2_rep1_23570,Hand2_rep2_19291
chr1	13642984	13643220	Hand2_rep2_14420,Hand2_rep1_12189
chr1	13656267	13656336	Hand2_rep1_20444,Hand2_rep2_15463
chr1	13771083	13771150	Hand2_rep2_51,Hand2_rep1_36
chr1	13835195	13835326	Hand2_rep2_13484,Hand2_rep1_15280
chr1	13861211	13861436	Hand2_rep2_8240,Hand2_rep1_10535
chr1	13905209	13905296	Hand2_rep2_1476,Hand2_rep1_1814
chr1	13912078	13912278	Hand2_rep2_9286,Hand2_rep1_2981
chr1	13927925	13928230	Hand2_rep1_14050,Hand2_rep2_10570
chr1	14038219	14038400	Hand2_rep1_2563,Hand2_rep2_1927
chr1	14162930	14163042	Hand2_rep2_9082,Hand2_rep1_7873
chr1	14165786	14166153	Hand2_rep1_13307,Hand2_rep2_17101
chr1	14495667	14495745	Hand2_rep1_20595,Hand2_rep2_14886
chr1	14512277	14512342	Hand2_rep1_9298,Hand2_rep2_13674
chr1	14570075	14570252	Hand2_rep1_19284,Hand2_rep2_11641
chr1	14571228	14571344	Hand2_rep2_6728,Hand2_rep1_8187
chr1	14575019	14575251	Hand2_rep2_7653,Hand2_rep1_5839
chr1	14621156	14621268	Hand2_rep2_1220,Hand2_rep1_1428
chr1	14635788	14635860	Hand2_rep1_6289,Hand2_rep2_9118
chr1	14925968	14926149	Hand2_rep1_6537,Hand2_rep2_9936
chr1	15034145	15034245	Hand2_rep2_1826,Hand2_rep1_1529
chr1	15358280	15358429	Hand2_rep2_10330,Hand2_rep1_12102
chr1	15471684	15471944	Hand2_rep2_5019,Hand2_rep1_7585
chr1	15551113	15551250	Hand2_rep1_16513,Hand2_rep2_9156
chr1	15926293	15926398	Hand2_rep2_7917,Hand2_rep1_9322
chr1	16136800	16136848	Hand2_rep1_16511,Hand2_rep2_19584
chr1	16139371	16139430	Hand2_rep1_14390,Hand2_rep2_6100
chr1	16186662	16186790	Hand2_rep1_11049,Hand2_rep2_8715
chr1	16229747	16229880	Hand2_rep1_131,Hand2_rep2_138
chr1	16231792	16231926	Hand2_rep2_2303,Hand2_rep1_1671
chr1	16240365	16240517	Hand2_rep1_18151,Hand2_rep2_11432
chr1	16398928	16398979	Hand2_rep1_2996,Hand2_rep2_1231
chr1	16656525	16656998	Hand2_rep1_18469,Hand2_rep2_8484
chr1	16901184	16901248	Hand2_rep2_4199,Hand2_rep1_6268
chr1	16904791	16904934	Hand2_rep2_5788,Hand2_rep1_5298
chr1	16983430	16983796	Hand2_rep2_15869,Hand2_rep1_14476
chr1	17240200	17240308	Hand2_rep1_23594,Hand2_rep2_11435
chr1	17305363	17305562	Hand2_rep1_11756,Hand2_rep2_6364
chr1	17726725	17726855	Hand2_rep1_13813,Hand2_rep2_10176
chr1	18460564	18460664	Hand2_rep2_6436,Hand2_rep1_10577
chr1	18462203	18462315	Hand2_rep1_14419,Hand2_rep2_14897
chr1	19225423	19225568	Hand2_rep2_14498,Hand2_rep1_11559
chr1	19292236	19292293	Hand2_rep1_6152,Hand2_rep2_6857
chr1	20135294	20135473	Hand2_rep2_12915,Hand2_rep1_4963
chr1	20248209	20248338	Hand2_rep1_2157,Hand2_rep2_1721
chr1	20466493	20466611	Hand2_rep2_1752,Hand2_rep1_1405
chr1	20801771	20801873	Hand2_rep2_4611,Hand2_rep1_8173
chr1	21154544	21154711	Hand2_rep1_10698,Hand2_rep2_11886
chr1	21611155	21611298	Hand2_rep1_9355,Hand2_rep2_9318
chr1	21712882	21712972	Hand2_rep2_4308,Hand2_rep1_5335
chr1	21883900	21883999	Hand2_rep1_5561,Hand2_rep2_4491
chr1	22890852	22890980	Hand2_rep1_3570,Hand2_rep2_4753
chr1	23146474	23146640	Hand2_rep1_4475,Hand2_rep2_3137
chr1	23284807	23284960	Hand2_rep2_19247,Hand2_rep1_23314
chr1	23656204	23656371	Hand2_rep2_11380,Hand2_rep1_7312
chr1	23966302	23966478	Hand2_rep2_12120,Hand2_rep1_9911
chr1	24005655	24005715	Hand2_rep1_684,Hand2_rep2_810
chr1	24196233	24196278	Hand2_rep2_607,Hand2_rep1_473
chr1	24239928	24240090	Hand2_rep2_11091,Hand2_rep1_5559
chr1	24550017	24550321	Hand2_rep1_13106,Hand2_rep2_17497
chr1	25189357	25189453	Hand2_rep1_18128,Hand2_rep2_16226
chr1	26765105	26765392	Hand2_rep2_3960,Hand2_rep1_1801
chr1	27105185	27105314	Hand2_rep2_11322,Hand2_rep1_14968
chr1	28025652	28025886	Hand2_rep1_13154,Hand2_rep2_18712
chr1	28214409	28214556	Hand2_rep1_9765,Hand2_rep2_10841
chr1	28420130	28420180	Hand2_rep2_9872,Hand2_rep1_12845
chr1	28420598	28420684	Hand2_rep2_4507,Hand2_rep1_3946
chr1	30536429	30536568	Hand2_rep1_15754,Hand2_rep2_8625
chr1	30537241	30537762	Hand2_rep2_16238,Hand2_rep1_21171
chr1	31072794	31073085	Hand2_rep2_4461,Hand2_rep1_2851
chr1	32229086	32229296	Hand2_rep2_13153,Hand2_rep1_21811
chr1	32240140	32240214	Hand2_rep1_5203,Hand2_rep2_6430
chr1	32283211	32283580	Hand2_rep2_7140,Hand2_rep1_7593
chr1	32429661	32429810	Hand2_rep1_4801,Hand2_rep2_6025
chr1	33883318	33883528	Hand2_rep2_8612,Hand2_rep1_16250
chr1	34020269	34020418	Hand2_rep2_11654,Hand2_rep1_19979
chr1	34052531	34052588	Hand2_rep1_2087,Hand2_rep2_1892
chr1	34254150	34254206	Hand2_rep1_7804,Hand2_rep2_10985
chr1	34256244	34256351	Hand2_rep1_5162,Hand2_rep2_3588
chr1	34783647	34783677	Hand2_rep2_4146,Hand2_rep1_4762
chr1	34783895	34783957	Hand2_rep2_1937,Hand2_rep1_1509
chr1	34842907	34843080	Hand2_rep2_11112,Hand2_rep1_8701
chr1	35580061	35580405	Hand2_rep2_17216,Hand2_rep1_19496
chr1	35982280	35982359	Hand2_rep2_5879,Hand2_rep1_5435
chr1	36017120	36017368	Hand2_rep2_13317,Hand2_rep1_13754
chr1	36332210	36332395	Hand2_rep2_10355,Hand2_rep1_22124
chr1	36580430	36580512	Hand2_rep2_7269,Hand2_rep1_10811
chr1	36588507	36588563	Hand2_rep1_5562,Hand2_rep2_6737
chr1	36995826	36995977	Hand2_rep1_8675,Hand2_rep2_15028
chr1	37004629	37004757	Hand2_rep2_13397,Hand2_rep1_6756
chr1	37013828	37013945	Hand2_rep1_6755,Hand2_rep2_5926
chr1	37111884	37112322	Hand2_rep1_9749,Hand2_rep2_9190
chr1	37122349	37122506	Hand2_rep1_217,Hand2_rep2_269
chr1	37125154	37125216	Hand2_rep1_148,Hand2_rep2_131
chr1	37220291	37220429	Hand2_rep1_54,Hand2_rep2_92
chr1	37222090	37222144	Hand2_rep1_248,Hand2_rep2_175
chr1	37231476	37231604	Hand2_rep1_2092,Hand2_rep2_1454
chr1	37384465	37384587	Hand2_rep1_8154,Hand2_rep2_10559
chr1	37584317	37584397	Hand2_rep2_7609,Hand2_rep1_5521
chr1	37610968	37611213	Hand2_rep2_9867,Hand2_rep1_5299
chr1	38103868	38104004	Hand2_rep2_2057,Hand2_rep1_2446
chr1	38248116	38248260	Hand2_rep1_21999,Hand2_rep2_17196
chr1	38358328	38358409	Hand2_rep1_6196,Hand2_rep2_6665
chr1	38388615	38388737	Hand2_rep2_16796,Hand2_rep1_15465
chr1	38467847	38468021	Hand2_rep1_4241,Hand2_rep2_5814
chr1	38490202	38490497	Hand2_rep1_8851,Hand2_rep2_9986
chr1	38512220	38512658	Hand2_rep2_8736,Hand2_rep1_15468
chr1	38529047	38529287	Hand2_rep1_20605,Hand2_rep2_11615
chr1	38554585	38554725	Hand2_rep2_11128,Hand2_rep1_8440
chr1	38606907	38607144	Hand2_rep2_3528,Hand2_rep1_7063
chr1	38760482	38760582	Hand2_rep2_2092,Hand2_rep1_1006
chr1	39244537	39244707	Hand2_rep2_12174,Hand2_rep1_8950
chr1	39312358	39312693	Hand2_rep2_17951,Hand2_rep1_18554
chr1	39443783	39443977	Hand2_rep2_14834,Hand2_rep1_10938
chr1	39455492	39455675	Hand2_rep2_10495,Hand2_rep1_11553
chr1	39464121	39464195	Hand2_rep2_10491,Hand2_rep1_9129
chr1	39515566	39515780	Hand2_rep2_12209,Hand2_rep1_6983
chr1	39555839	39555963	Hand2_rep2_3171,Hand2_rep1_4102
chr1	39614218	39614500	Hand2_rep1_11554,Hand2_rep2_6561,Hand2_rep1_13700
chr1	39702907	39703110	Hand2_rep1_10600,Hand2_rep2_12570
chr1	39868301	39868400	Hand2_rep2_6329,Hand2_rep1_5953
chr1	40189918	40190158	Hand2_rep1_13350,Hand2_rep2_8653
chr1	40243742	40243921	Hand2_rep1_13978,Hand2_rep2_9444
chr1	40355720	40355874	Hand2_rep1_6789,Hand2_rep2_9884
chr1	40548191	40548384	Hand2_rep2_6957,Hand2_rep1_6347
chr1	41007268	41007373	Hand2_rep2_5259,Hand2_rep1_5846
chr1	41085962	41086058	Hand2_rep2_5679,Hand2_rep1_17420
chr1	41652767	41652858	Hand2_rep2_3153,Hand2_rep1_1504
chr1	42209012	42209264	Hand2_rep1_18179,Hand2_rep2_17060
chr1	42215125	42215510	Hand2_rep2_3272,Hand2_rep1_1757
chr1	42233295	42233475	Hand2_rep2_5084,Hand2_rep1_6903
chr1	42234215	42234316	Hand2_rep1_22248,Hand2_rep2_16246
chr1	42261897	42261990	Hand2_rep1_10816,Hand2_rep2_16130
chr1	42954202	42954266	Hand2_rep1_3504,Hand2_rep2_7300
chr1	43010458	43010675	Hand2_rep2_7401,Hand2_rep1_4087
chr1	43019950	43020063	Hand2_rep2_657,Hand2_rep1_502
chr1	43024797	43024997	Hand2_rep1_14514,Hand2_rep2_11500
chr1	43037828	43038108	Hand2_rep2_8981,Hand2_rep1_9540
chr1	43055061	43055353	Hand2_rep2_15452,Hand2_rep1_7569
chr1	43203416	43203578	Hand2_rep2_1924,Hand2_rep1_1485
chr1	43215761	43215975	Hand2_rep1_7062,Hand2_rep2_14079
chr1	43225507	43225987	Hand2_rep1_3956,Hand2_rep2_2548
chr1	43358262	43358404	Hand2_rep1_6356,Hand2_rep2_4572
chr1	43445368	43445398	Hand2_rep1_199,Hand2_rep2_156
chr1	43447851	43448021	Hand2_rep1_12699,Hand2_rep2_10762
chr1	43496221	43496348	Hand2_rep1_6232,Hand2_rep2_6697
chr1	43506359	43506465	Hand2_rep2_12316,Hand2_rep1_15558
chr1	43672242	43672382	Hand2_rep1_23180,Hand2_rep2_19741
chr1	43884396	43884491	Hand2_rep1_23956,Hand2_rep2_16919
chr1	44169701	44169778	Hand2_rep2_2448,Hand2_rep1_3150
chr1	44591830	44592067	Hand2_rep2_2614,Hand2_rep1_1988
chr1	44618921	44618959	Hand2_rep2_3124,Hand2_rep1_2443
chr1	44679130	44679194	Hand2_rep2_4666,Hand2_rep1_4605
chr1	44748361	44748499	Hand2_rep2_6029,Hand2_rep1_4603
chr1	44781930	44782009	Hand2_rep1_10013,Hand2_rep2_16421
chr1	44833933	44834137	Hand2_rep2_3467,Hand2_rep1_5365
chr1	45020674	45020755	Hand2_rep2_611,Hand2_rep1_1231
chr1	45056243	45056352	Hand2_rep1_6239,Hand2_rep2_3850
chr1	45310887	45311196	Hand2_rep2_10280,Hand2_rep1_13584
chr1	45316815	45316866	Hand2_rep1_2760,Hand2_rep2_6944
chr1	45502134	45502196	Hand2_rep2_8775,Hand2_rep1_7168
chr1	45675914	45676097	Hand2_rep2_4689,Hand2_rep1_5118
chr1	45760731	45760805	Hand2_rep1_212,Hand2_rep2_214
chr1	45765752	45765943	Hand2_rep2_6743,Hand2_rep1_5698
chr1	45905383	45905438	Hand2_rep2_12005,Hand2_rep1_10361
chr1	47378653	47378779	Hand2_rep1_3550,Hand2_rep2_1862
chr1	47640937	47641016	Hand2_rep2_7658,Hand2_rep1_11143
chr1	50636520	50636655	Hand2_rep1_1587,Hand2_rep2_2137
chr1	51112364	51112481	Hand2_rep2_9073,Hand2_rep1_9617
chr1	51268393	51268666	Hand2_rep1_7018,Hand2_rep2_13183
chr1	51288786	51288903	Hand2_rep2_3111,Hand2_rep1_3996
chr1	51307280	51307362	Hand2_rep2_6206,Hand2_rep1_5566
chr1	51486177	51486416	Hand2_rep2_3732,Hand2_rep1_3658
chr1	51509182	51509465	Hand2_rep2_3372,Hand2_rep1_3901
chr1	51580713	51580867	Hand2_rep2_10275,Hand2_rep1_4798
chr1	51599735	51599885	Hand2_rep2_13687,Hand2_rep1_6866
chr1	52233202	52233245	Hand2_rep2_3762,Hand2_rep1_1863
chr1	52651666	52651828	Hand2_rep2_15674,Hand2_rep1_9795
chr1	52653053	52653100	Hand2_rep1_3237,Hand2_rep2_2208
chr1	52844615	52844988	Hand2_rep2_14159,Hand2_rep1_21085
chr1	53019207	53019376	Hand2_rep1_22982,Hand2_rep2_16918
chr1	53861036	53861179	Hand2_rep2_1802,Hand2_rep1_3086
chr1	54070288	54070373	Hand2_rep1_1517,Hand2_rep2_1027
chr1	54085039	54085084	Hand2_rep1_1693,Hand2_rep2_2619
chr1	54907128	54907348	Hand2_rep1_4865,Hand2_rep2_9234
chr1	54924704	54924937	Hand2_rep1_16077,Hand2_rep2_7987
chr1	54965593	54965857	Hand2_rep1_22052,Hand2_rep2_14937
chr1	55193361	55193516	Hand2_rep1_2722,Hand2_rep2_2763
chr1	55224130	55224381	Hand2_rep2_10847,Hand2_rep1_8046
chr1	55433848	55433894	Hand2_rep2_6474,Hand2_rep1_7549
chr1	55522555	55522684	Hand2_rep2_18900,Hand2_rep1_17525
chr1	55854666	55854755	Hand2_rep2_6582,Hand2_rep1_9505
chr1	55893467	55893649	Hand2_rep1_3310,Hand2_rep2_4478
chr1	55922456	55922506	Hand2_rep1_4149,Hand2_rep2_3360
chr1	55997239	55997342	Hand2_rep1_1443,Hand2_rep2_978
chr1	56201064	56201205	Hand2_rep2_1951,Hand2_rep1_5709
chr1	56202044	56202160	Hand2_rep2_7352,Hand2_rep1_12944
chr1	56286872	56287176	Hand2_rep2_12314,Hand2_rep1_7785
chr1	56349045	56349100	Hand2_rep1_717,Hand2_rep2_1540
chr1	56539729	56539792	Hand2_rep1_4214,Hand2_rep2_3092
chr1	56806104	56806238	Hand2_rep2_14314,Hand2_rep1_17524
chr1	56856068	56856259	Hand2_rep2_19087,Hand2_rep1_12924
chr1	56907243	56907348	Hand2_rep2_8684,Hand2_rep1_5627
chr1	56972158	56972342	Hand2_rep2_16490,Hand2_rep1_10381
chr1	56982253	56982351	Hand2_rep2_563,Hand2_rep1_314
chr1	57096344	57096384	Hand2_rep1_409,Hand2_rep2_487
chr1	57209303	57209490	Hand2_rep2_8839,Hand2_rep1_6504
chr1	57214322	57214431	Hand2_rep2_15343,Hand2_rep1_12470
chr1	57227406	57227568	Hand2_rep2_2388,Hand2_rep1_936
chr1	57252042	57252094	Hand2_rep2_2989,Hand2_rep1_3933
chr1	57267246	57267375	Hand2_rep2_7158,Hand2_rep1_4097
chr1	57437089	57437153	Hand2_rep2_829,Hand2_rep1_1453
chr1	57440723	57441052	Hand2_rep2_3597,Hand2_rep1_4625
chr1	57477800	57478264	Hand2_rep2_8005,Hand2_rep1_22368,Hand2_rep1_5482
chr1	57490003	57490289	Hand2_rep1_23320,Hand2_rep2_9221
chr1	57594000	57594073	Hand2_rep2_4846,Hand2_rep1_20072
chr1	57749822	57750090	Hand2_rep1_17553,Hand2_rep2_13580
chr1	57820417	57820665	Hand2_rep1_18893,Hand2_rep2_15024
chr1	57825142	57825277	Hand2_rep1_4923,Hand2_rep2_6073
chr1	57906076	57906246	Hand2_rep2_10102,Hand2_rep1_18513
chr1	57930701	57930816	Hand2_rep2_6189,Hand2_rep1_11645
chr1	57947658	57947795	Hand2_rep2_2702,Hand2_rep1_4419
chr1	58188903	58189063	Hand2_rep2_19670,Hand2_rep1_17573
chr1	58291973	58292181	Hand2_rep1_18508,Hand2_rep2_14367
chr1	58952990	58953180	Hand2_rep1_20863,Hand2_rep2_16408
chr1	59270447	59270591	Hand2_rep1_4018,Hand2_rep2_3297
chr1	59287716	59287829	Hand2_rep2_1118,Hand2_rep1_945
chr1	59291725	59291895	Hand2_rep2_17682,Hand2_rep1_19708
chr1	59310359	59310527	Hand2_rep1_1857,Hand2_rep2_3066
chr1	59335414	59335507	Hand2_rep1_1120,Hand2_rep2_2282
chr1	59455902	59455936	Hand2_rep1_12556,Hand2_rep2_11980
chr1	59481238	59481485	Hand2_rep1_3119,Hand2_rep2_3648
chr1	59516255	59516447	Hand2_rep1_11192,Hand2_rep2_10411
chr1	59540801	59540901	Hand2_rep1_18080,Hand2_rep2_14270
chr1	59544008	59544211	Hand2_rep2_7472,Hand2_rep1_4453
chr1	59609854	59610151	Hand2_rep1_3835,Hand2_rep2_6158
chr1	59833800	59834038	Hand2_rep2_17401,Hand2_rep1_18500
chr1	59888102	59888248	Hand2_rep1_3647,Hand2_rep2_4555
chr1	60343123	60343528	Hand2_rep1_15884,Hand2_rep2_15533
chr1	60650292	60650421	Hand2_rep1_9138,Hand2_rep2_8307
chr1	60744474	60744589	Hand2_rep2_17404,Hand2_rep1_5945
chr1	61068013	61068147	Hand2_rep2_15540,Hand2_rep1_19726
chr1	61103671	61103781	Hand2_rep2_1088,Hand2_rep1_1310
chr1	61143015	61143449	Hand2_rep2_19394,Hand2_rep1_12517,Hand2_rep2_10369
chr1	61203186	61203363	Hand2_rep1_7484,Hand2_rep2_8832
chr1	61233620	61233983	Hand2_rep1_11650,Hand2_rep2_16812
chr1	61257595	61257850	Hand2_rep2_15199,Hand2_rep1_8486
chr1	61298299	61298441	Hand2_rep2_3110,Hand2_rep1_3928
chr1	61312689	61312787	Hand2_rep1_1569,Hand2_rep2_1012
chr1	61331608	61331689	Hand2_rep1_2210,Hand2_rep2_1267
chr1	61355334	61355435	Hand2_rep2_9250,Hand2_rep1_11651
chr1	61530345	61530438	Hand2_rep2_7691,Hand2_rep1_3035
chr1	61715917	61716321	Hand2_rep2_11767,Hand2_rep1_24086
chr1	61938928	61939035	Hand2_rep1_8756,Hand2_rep2_18433
chr1	61942522	61942685	Hand2_rep1_9154,Hand2_rep2_12425
chr1	62018500	62018575	Hand2_rep1_1260,Hand2_rep2_2393
chr1	62071269	62071401	Hand2_rep2_16870,Hand2_rep1_11876
chr1	62197262	62197393	Hand2_rep1_4136,Hand2_rep2_4853
chr1	62259883	62260373	Hand2_rep1_8063,Hand2_rep2_3125
chr1	62272678	62272754	Hand2_rep1_9346,Hand2_rep2_4449
chr1	62374535	62374628	Hand2_rep2_4549,Hand2_rep1_3922
chr1	62532813	62532931	Hand2_rep1_6250,Hand2_rep2_4907
chr1	62562927	62563130	Hand2_rep2_12933,Hand2_rep1_11216
chr1	62579543	62579665	Hand2_rep1_17232,Hand2_rep2_17892
chr1	62590787	62590985	Hand2_rep2_14767,Hand2_rep1_16508
chr1	62591543	62591656	Hand2_rep1_19080,Hand2_rep2_12764
chr1	62614777	62614905	Hand2_rep2_13563,Hand2_rep1_20096
chr1	62635252	62635289	Hand2_rep1_1839,Hand2_rep2_2921
chr1	62665041	62665237	Hand2_rep1_9686,Hand2_rep2_13127
chr1	62683002	62683155	Hand2_rep2_16504,Hand2_rep1_23119
chr1	62759896	62760067	Hand2_rep2_12382,Hand2_rep1_19678
chr1	62765238	62765418	Hand2_rep1_20932,Hand2_rep2_8609
chr1	62766842	62767053	Hand2_rep2_15172,Hand2_rep1_22623
chr1	62779936	62780100	Hand2_rep1_1319,Hand2_rep2_1586
chr1	62813271	62813396	Hand2_rep2_2801,Hand2_rep1_2346
chr1	62860975	62861040	Hand2_rep2_1390,Hand2_rep1_1419
chr1	62881098	62881335	Hand2_rep1_14074,Hand2_rep2_15165
chr1	62909832	62909903	Hand2_rep2_497,Hand2_rep1_1021
chr1	62937527	62937639	Hand2_rep1_5891,Hand2_rep2_8742
chr1	62941992	62942151	Hand2_rep1_8843,Hand2_rep2_17194
chr1	63193254	63193348	Hand2_rep1_11484,Hand2_rep2_8932
chr1	63204354	63204570	Hand2_rep1_16992,Hand2_rep2_12255
chr1	63553152	63553381	Hand2_rep1_9891,Hand2_rep2_6367
chr1	63563512	63563555	Hand2_rep2_759,Hand2_rep1_972
chr1	63711344	63711495	Hand2_rep2_10141,Hand2_rep1_3785
chr1	63850724	63850981	Hand2_rep1_8275,Hand2_rep2_6487
chr1	64066921	64067078	Hand2_rep1_9614,Hand2_rep2_11063
chr1	64380610	64380658	Hand2_rep1_3439,Hand2_rep2_3123
chr1	64633101	64633242	Hand2_rep2_15757,Hand2_rep1_7904
chr1	64751428	64751590	Hand2_rep1_9894,Hand2_rep2_10642
chr1	64791492	64791570	Hand2_rep2_4122,Hand2_rep1_4126
chr1	64825993	64826144	Hand2_rep1_4511,Hand2_rep2_3087
chr1	64878791	64878863	Hand2_rep1_12573,Hand2_rep2_16141
chr1	64918763	64918988	Hand2_rep2_8381,Hand2_rep1_11715
chr1	65165877	65166028	Hand2_rep1_5814,Hand2_rep2_5156
chr1	65564263	65564311	Hand2_rep1_11505,Hand2_rep2_19085
chr1	65650880	65651125	Hand2_rep2_5281,Hand2_rep1_4127
chr1	65792141	65792273	Hand2_rep1_11504,Hand2_rep2_3236
chr1	66700612	66700797	Hand2_rep2_17225,Hand2_rep1_16023
chr1	66802019	66802140	Hand2_rep1_2479,Hand2_rep2_1503
chr1	66821409	66821509	Hand2_rep1_3388,Hand2_rep2_2395
chr1	67465664	67465736	Hand2_rep1_323,Hand2_rep2_237
chr1	68318664	68318880	Hand2_rep2_8138,Hand2_rep1_3385
chr1	68505010	68505189	Hand2_rep2_6732,Hand2_rep1_8766
chr1	68797164	68797264	Hand2_rep2_14630,Hand2_rep1_12520
chr1	69638028	69638107	Hand2_rep1_7818,Hand2_rep2_5430
chr1	69787462	69787716	Hand2_rep2_14624,Hand2_rep1_18083
chr1	69996981	69997055	Hand2_rep1_18025,Hand2_rep2_10608
chr1	70067286	70067456	Hand2_rep2_11746,Hand2_rep1_6883
chr1	70408563	70408675	Hand2_rep1_7826,Hand2_rep2_15910
chr1	70519103	70519325	Hand2_rep2_8218,Hand2_rep1_13529
chr1	71865683	71865988	Hand2_rep2_19931,Hand2_rep1_23278
chr1	71896870	71897153	Hand2_rep2_6083,Hand2_rep1_6524
chr1	71980803	71980878	Hand2_rep1_3112,Hand2_rep2_2223
chr1	72002492	72002595	Hand2_rep1_2853,Hand2_rep2_3102
chr1	72020415	72020492	Hand2_rep1_7847,Hand2_rep2_5627
chr1	72309732	72309982	Hand2_rep2_11366,Hand2_rep1_8431
chr1	72487631	72487774	Hand2_rep2_2960,Hand2_rep1_2688
chr1	72744831	72745292	Hand2_rep2_7275,Hand2_rep1_14827,Hand2_rep1_10603
chr1	72778881	72779050	Hand2_rep2_18640,Hand2_rep1_15351
chr1	72780849	72780935	Hand2_rep1_6285,Hand2_rep2_8105
chr1	72871087	72871267	Hand2_rep1_13490,Hand2_rep2_12748
chr1	72908687	72908792	Hand2_rep2_10962,Hand2_rep1_13690
chr1	72936234	72936468	Hand2_rep2_9897,Hand2_rep1_5040
chr1	72991932	72992088	Hand2_rep1_20780,Hand2_rep2_17158
chr1	73041728	73041866	Hand2_rep1_8652,Hand2_rep2_2522
chr1	73045861	73046081	Hand2_rep1_7469,Hand2_rep2_13732
chr1	73069560	73069611	Hand2_rep1_13033,Hand2_rep2_4645
chr1	73072355	73072569	Hand2_rep2_10618,Hand2_rep1_15166
chr1	73206953	73207055	Hand2_rep2_12862,Hand2_rep1_14509
chr1	73246622	73246658	Hand2_rep2_8897,Hand2_rep1_7365
chr1	73251916	73252214	Hand2_rep2_9530,Hand2_rep1_8060
chr1	73363752	73363918	Hand2_rep1_5699,Hand2_rep2_4076
chr1	73370921	73371028	Hand2_rep2_5402,Hand2_rep1_7098
chr1	73438401	73438433	Hand2_rep1_2146,Hand2_rep2_1490
chr1	73702699	73702867	Hand2_rep1_3374,Hand2_rep2_3048
chr1	73758864	73758913	Hand2_rep1_4569,Hand2_rep2_5405
chr1	73771934	73772037	Hand2_rep1_14360,Hand2_rep2_11727
chr1	73943574	73943781	Hand2_rep1_18403,Hand2_rep2_14188
chr1	73948750	73948890	Hand2_rep2_2951,Hand2_rep1_1190
chr1	73972857	73972943	Hand2_rep2_4154,Hand2_rep1_6263
chr1	74030960	74031178	Hand2_rep2_11502,Hand2_rep1_20729
chr1	74041720	74041885	Hand2_rep1_13527,Hand2_rep2_7959
chr1	74083461	74083545	Hand2_rep2_17877,Hand2_rep1_11937
chr1	74091898	74091959	Hand2_rep2_9295,Hand2_rep1_5822
chr1	74127731	74127775	Hand2_rep1_5186,Hand2_rep2_9237
chr1	74180094	74180207	Hand2_rep1_503,Hand2_rep2_441
chr1	74240435	74240495	Hand2_rep1_747,Hand2_rep2_689
chr1	74271714	74271843	Hand2_rep1_13837,Hand2_rep2_7674
chr1	74275019	74275108	Hand2_rep1_367,Hand2_rep2_380
chr1	74308565	74308766	Hand2_rep2_18022,Hand2_rep1_13521
chr1	74309805	74309901	Hand2_rep1_7725,Hand2_rep2_10123
chr1	74361889	74361989	Hand2_rep2_12574,Hand2_rep1_10064
chr1	74588025	74588184	Hand2_rep2_13147,Hand2_rep1_12223
chr1	74713119	74713264	Hand2_rep1_21884,Hand2_rep2_14203
chr1	74715500	74715715	Hand2_rep2_16411,Hand2_rep1_9972
chr1	74808128	74808373	Hand2_rep2_14098,Hand2_rep1_11164
chr1	74898689	74898782	Hand2_rep2_3366,Hand2_rep1_3197
chr1	75360086	75360160	Hand2_rep1_6165,Hand2_rep2_14752
chr1	75639777	75639979	Hand2_rep2_9475,Hand2_rep1_13618
chr1	75652613	75652828	Hand2_rep1_22315,Hand2_rep2_19864
chr1	75662787	75662860	Hand2_rep1_1064,Hand2_rep2_802
chr1	75692137	75692239	Hand2_rep2_859,Hand2_rep1_573
chr1	75820557	75820671	Hand2_rep2_9075,Hand2_rep1_8270
chr1	75833420	75833764	Hand2_rep1_14801,Hand2_rep2_5516
chr1	75916288	75916373	Hand2_rep1_3393,Hand2_rep2_4641
chr1	75936672	75936778	Hand2_rep2_1602,Hand2_rep1_2046
chr1	75958713	75958894	Hand2_rep2_4717,Hand2_rep1_7574
chr1	75975321	75975455	Hand2_rep1_15954,Hand2_rep2_7218
chr1	76080389	76080457	Hand2_rep1_1963,Hand2_rep2_1366
chr1	76421877	76422041	Hand2_rep2_16138,Hand2_rep1_10275
chr1	76467670	76467818	Hand2_rep2_12102,Hand2_rep1_7912
chr1	76531835	76531958	Hand2_rep2_16566,Hand2_rep1_20514
chr1	76771823	76772164	Hand2_rep2_19303,Hand2_rep1_13684
chr1	76852767	76852926	Hand2_rep1_16470,Hand2_rep2_18998
chr1	76873996	76874097	Hand2_rep2_3922,Hand2_rep1_4611
chr1	76967009	76967225	Hand2_rep1_19410,Hand2_rep2_8673
chr1	76975191	76975485	Hand2_rep1_21166,Hand2_rep2_19692
chr1	76975828	76975912	Hand2_rep1_2012,Hand2_rep2_1803
chr1	77038355	77038392	Hand2_rep1_189,Hand2_rep2_132
chr1	77043903	77044150	Hand2_rep2_4599,Hand2_rep1_5539
chr1	77047382	77047623	Hand2_rep1_3572,Hand2_rep2_2859
chr1	77051365	77051524	Hand2_rep2_12583,Hand2_rep1_12937
chr1	77102057	77102162	Hand2_rep1_16445,Hand2_rep2_6297
chr1	77102465	77102566	Hand2_rep1_20554,Hand2_rep2_15693
chr1	77132044	77132208	Hand2_rep1_9683,Hand2_rep2_19094
chr1	77140892	77141247	Hand2_rep1_6323,Hand2_rep2_4390
chr1	77181619	77181797	Hand2_rep2_16431,Hand2_rep1_19056
chr1	77186706	77186819	Hand2_rep2_4313,Hand2_rep1_10330
chr1	77197211	77197282	Hand2_rep2_4729,Hand2_rep1_9951
chr1	77227222	77227331	Hand2_rep2_1031,Hand2_rep1_1785
chr1	77228094	77228215	Hand2_rep2_774,Hand2_rep1_333
chr1	77253015	77253104	Hand2_rep2_14044,Hand2_rep1_16192
chr1	77307931	77308211	Hand2_rep1_11568,Hand2_rep2_9061
chr1	77337128	77337274	Hand2_rep1_2698,Hand2_rep2_2771
chr1	77338385	77338458	Hand2_rep1_19,Hand2_rep2_46
chr1	77388612	77388792	Hand2_rep2_10678,Hand2_rep1_14700
chr1	77404683	77404833	Hand2_rep1_9649,Hand2_rep2_17871
chr1	77471164	77471320	Hand2_rep1_14296,Hand2_rep2_17694
chr1	77768137	77768242	Hand2_rep1_20429,Hand2_rep2_11853
chr1	77773858	77774070	Hand2_rep2_16430,Hand2_rep1_15198
chr1	77952907	77953016	Hand2_rep1_7093,Hand2_rep2_3296
chr1	78004053	78004189	Hand2_rep1_2324,Hand2_rep2_2811
chr1	78027040	78027436	Hand2_rep1_21781,Hand2_rep2_16433
chr1	78030097	78030190	Hand2_rep1_3977,Hand2_rep2_2397
chr1	78066199	78066354	Hand2_rep2_2865,Hand2_rep1_4415
chr1	78079978	78080293	Hand2_rep2_10909,Hand2_rep1_11330
chr1	78083082	78083183	Hand2_rep1_2580,Hand2_rep2_1988
chr1	78158000	78158076	Hand2_rep1_13080,Hand2_rep2_15418
chr1	78218126	78218184	Hand2_rep1_12625,Hand2_rep2_16031
chr1	78232107	78232180	Hand2_rep1_20819,Hand2_rep2_16598
chr1	78311624	78311805	Hand2_rep1_208,Hand2_rep2_460
chr1	78343753	78343816	Hand2_rep1_1851,Hand2_rep2_1169
chr1	78428634	78428754	Hand2_rep1_5146,Hand2_rep2_3873
chr1	78448212	78448275	Hand2_rep2_2211,Hand2_rep1_3788
chr1	78461308	78461700	Hand2_rep2_14729,Hand2_rep1_7573
chr1	78554076	78554262	Hand2_rep2_16769,Hand2_rep1_20818
chr1	78563297	78563391	Hand2_rep2_1254,Hand2_rep1_1171
chr1	78567789	78568031	Hand2_rep2_15355,Hand2_rep1_13092
chr1	78568481	78568578	Hand2_rep1_17076,Hand2_rep2_13355
chr1	78588834	78588917	Hand2_rep1_13803,Hand2_rep2_10703
chr1	78702410	78702551	Hand2_rep1_17707,Hand2_rep2_14077
chr1	78819687	78819798	Hand2_rep2_16461,Hand2_rep1_11848
chr1	78876222	78876402	Hand2_rep2_5052,Hand2_rep1_8669
chr1	78919653	78919763	Hand2_rep2_13922,Hand2_rep1_10256
chr1	79311271	79311543	Hand2_rep2_12860,Hand2_rep1_20980
chr1	79314874	79315040	Hand2_rep2_13662,Hand2_rep1_14004
chr1	79424102	79424219	Hand2_rep2_3410,Hand2_rep1_2821
chr1	79882749	79882799	Hand2_rep2_6428,Hand2_rep1_5418
chr1	80014771	80015010	Hand2_rep1_8485,Hand2_rep2_7069
chr1	80348331	80348561	Hand2_rep1_4793,Hand2_rep2_1264
chr1	80456928	80457068	Hand2_rep2_3231,Hand2_rep1_3421
chr1	80656644	80656737	Hand2_rep2_16653,Hand2_rep1_16216
chr1	81358901	81358992	Hand2_rep1_14168,Hand2_rep2_7499
chr1	81517415	81517533	Hand2_rep1_10464,Hand2_rep2_6415
chr1	81608912	81609018	Hand2_rep2_4050,Hand2_rep1_2761
chr1	81744559	81744762	Hand2_rep1_10894,Hand2_rep2_5409
chr1	81916795	81916966	Hand2_rep2_8714,Hand2_rep1_8763
chr1	82112532	82112588	Hand2_rep2_861,Hand2_rep1_2217
chr1	82129771	82129938	Hand2_rep2_12775,Hand2_rep1_12887
chr1	82257540	82257629	Hand2_rep2_2286,Hand2_rep1_1725
chr1	82362278	82362436	Hand2_rep2_13213,Hand2_rep1_23505
chr1	82375010	82375896	Hand2_rep1_13456,Hand2_rep2_16671,Hand2_rep2_16017,Hand2_rep1_16212
chr1	83159530	83159733	Hand2_rep2_17443,Hand2_rep1_13854
chr1	83218463	83218597	Hand2_rep1_1927,Hand2_rep2_954
chr1	83273490	83273605	Hand2_rep1_6473,Hand2_rep2_3251
chr1	83870998	83871074	Hand2_rep1_1797,Hand2_rep2_2328
chr1	83896764	83897150	Hand2_rep1_14923,Hand2_rep2_10961
chr1	84012872	84013018	Hand2_rep1_13641,Hand2_rep2_18993
chr1	84087596	84087729	Hand2_rep2_3253,Hand2_rep1_10297
chr1	85669784	85670036	Hand2_rep1_18512,Hand2_rep2_7049
chr1	85670615	85670829	Hand2_rep1_4595,Hand2_rep2_5375
chr1	85793185	85793456	Hand2_rep1_10682,Hand2_rep2_14330
chr1	85894950	85895220	Hand2_rep2_19113,Hand2_rep1_6698
chr1	86398056	86398478	Hand2_rep2_17554,Hand2_rep1_14701
chr1	86434172	86434644	Hand2_rep2_19313,Hand2_rep2_12465,Hand2_rep1_12160
chr1	86440112	86440378	Hand2_rep2_14382,Hand2_rep1_15629
chr1	86464982	86465083	Hand2_rep2_1714,Hand2_rep1_1657
chr1	87562908	87563013	Hand2_rep2_2363,Hand2_rep1_2267
chr1	87638466	87638541	Hand2_rep1_14852,Hand2_rep2_11805
chr1	87755838	87755916	Hand2_rep2_14613,Hand2_rep1_10303
chr1	87795847	87795950	Hand2_rep1_19327,Hand2_rep2_16113
chr1	87846980	87847091	Hand2_rep2_19538,Hand2_rep1_19331
chr1	87916849	87917085	Hand2_rep1_14246,Hand2_rep2_14151
chr1	88040917	88041047	Hand2_rep1_21993,Hand2_rep2_18055
chr1	88064447	88064586	Hand2_rep2_19262,Hand2_rep1_19307
chr1	88109209	88109450	Hand2_rep1_13201,Hand2_rep2_16827
chr1	88140737	88140797	Hand2_rep2_3518,Hand2_rep1_2245
chr1	88145466	88145639	Hand2_rep2_17218,Hand2_rep1_8507
chr1	88357534	88357717	Hand2_rep2_14539,Hand2_rep1_16195
chr1	88472431	88472662	Hand2_rep1_16138,Hand2_rep2_11960
chr1	88486449	88486606	Hand2_rep2_17586,Hand2_rep1_11267
chr1	88613247	88613339	Hand2_rep2_4070,Hand2_rep1_2823
chr1	88752455	88752644	Hand2_rep2_19783,Hand2_rep1_21029
chr1	88799462	88799549	Hand2_rep2_3491,Hand2_rep1_3043
chr1	88821449	88821598	Hand2_rep1_4730,Hand2_rep2_2613
chr1	89005695	89005793	Hand2_rep1_1649,Hand2_rep2_2578
chr1	89021921	89021973	Hand2_rep1_6679,Hand2_rep2_2150
chr1	89024697	89024969	Hand2_rep2_8713,Hand2_rep1_7290
chr1	89059894	89059970	Hand2_rep2_686,Hand2_rep1_1373
chr1	89191184	89191506	Hand2_rep2_12943,Hand2_rep1_6459
chr1	89364458	89364617	Hand2_rep2_5114,Hand2_rep1_6011
chr1	89415912	89415951	Hand2_rep1_9669,Hand2_rep2_6505
chr1	89461307	89461463	Hand2_rep2_18367,Hand2_rep1_19386
chr1	89537943	89538778	Hand2_rep2_14872,Hand2_rep1_4421,Hand2_rep2_13273
chr1	89550139	89550305	Hand2_rep2_3755,Hand2_rep1_1773
chr1	89556892	89557387	Hand2_rep1_11487,Hand2_rep2_14494
chr1	89616661	89616725	Hand2_rep2_10733,Hand2_rep1_6563
chr1	89643915	89643977	Hand2_rep1_6480,Hand2_rep2_7126
chr1	89708625	89708725	Hand2_rep2_14873,Hand2_rep1_13838
chr1	89816867	89817113	Hand2_rep2_19158,Hand2_rep1_18277
chr1	89846245	89846303	Hand2_rep2_13776,Hand2_rep1_9359
chr1	89909574	89909718	Hand2_rep1_9508,Hand2_rep2_15299
chr1	90052161	90052208	Hand2_rep2_922,Hand2_rep1_714
chr1	90100496	90100640	Hand2_rep2_847,Hand2_rep1_1990
chr1	90104132	90104267	Hand2_rep2_9959,Hand2_rep1_11760
chr1	90115861	90115948	Hand2_rep2_3174,Hand2_rep1_4043
chr1	90153529	90153659	Hand2_rep1_593,Hand2_rep2_1095
chr1	90220370	90220463	Hand2_rep1_18582,Hand2_rep2_14617
chr1	90232194	90232255	Hand2_rep1_19366,Hand2_rep2_14175
chr1	90234731	90234829	Hand2_rep2_12913,Hand2_rep1_7922
chr1	90265510	90265598	Hand2_rep2_4615,Hand2_rep1_9987
chr1	90283063	90283391	Hand2_rep2_17185,Hand2_rep1_13056
chr1	90300177	90300509	Hand2_rep2_3362,Hand2_rep1_3214
chr1	90327649	90327847	Hand2_rep2_17013,Hand2_rep1_8996
chr1	90334893	90335346	Hand2_rep2_18264,Hand2_rep1_9981,Hand2_rep2_6660
chr1	90349664	90349940	Hand2_rep2_2065,Hand2_rep1_2839
chr1	90352867	90353058	Hand2_rep1_11836,Hand2_rep2_19840
chr1	90353630	90353719	Hand2_rep2_1206,Hand2_rep1_1752
chr1	90383167	90383324	Hand2_rep1_5692,Hand2_rep2_6531
chr1	90397353	90397689	Hand2_rep2_4047,Hand2_rep1_5290
chr1	90405641	90405748	Hand2_rep2_17434,Hand2_rep1_15095
chr1	90505355	90505448	Hand2_rep1_1407,Hand2_rep2_1887
chr1	90650928	90651182	Hand2_rep2_12321,Hand2_rep1_9023
chr1	90662537	90662665	Hand2_rep1_10530,Hand2_rep2_7281
chr1	90734086	90734149	Hand2_rep2_6155,Hand2_rep1_12834
chr1	90735297	90735486	Hand2_rep1_5149,Hand2_rep2_5778
chr1	90744082	90744224	Hand2_rep2_4230,Hand2_rep1_6828
chr1	90750197	90750363	Hand2_rep2_5372,Hand2_rep1_4455
chr1	90775760	90775980	Hand2_rep1_18241,Hand2_rep2_8156
chr1	90836043	90836159	Hand2_rep1_6580,Hand2_rep2_5893
chr1	90838162	90838726	Hand2_rep2_19095,Hand2_rep1_19347,Hand2_rep1_17056
chr1	90844075	90844192	Hand2_rep1_14034,Hand2_rep2_18794
chr1	90896864	90897281	Hand2_rep1_18594,Hand2_rep2_9973
chr1	90962359	90962560	Hand2_rep2_15187,Hand2_rep1_17055
chr1	90963129	90963204	Hand2_rep1_19005,Hand2_rep2_18919
chr1	91085474	91085562	Hand2_rep2_2405,Hand2_rep1_2140
chr1	91227594	91227857	Hand2_rep1_3869,Hand2_rep2_8328
chr1	91255334	91255527	Hand2_rep2_12495,Hand2_rep1_17374
chr1	91398002	91398114	Hand2_rep1_17376,Hand2_rep2_18605
chr1	91414147	91414253	Hand2_rep1_2218,Hand2_rep2_3032
chr1	91417963	91418184	Hand2_rep1_13554,Hand2_rep2_6849
chr1	91578183	91578423	Hand2_rep1_8082,Hand2_rep2_10760
chr1	91585023	91585224	Hand2_rep1_9703,Hand2_rep2_6107
chr1	91611488	91611549	Hand2_rep1_8604,Hand2_rep2_9417
chr1	91624703	91624985	Hand2_rep1_17053,Hand2_rep2_17433
chr1	91626211	91626341	Hand2_rep2_8731,Hand2_rep1_8945
chr1	91659785	91659943	Hand2_rep1_11872,Hand2_rep2_6968
chr1	91664698	91664884	Hand2_rep2_5450,Hand2_rep1_3459
chr1	91755218	91755339	Hand2_rep1_10468,Hand2_rep2_11584
chr1	91759377	91759534	Hand2_rep2_6972,Hand2_rep1_14064
chr1	91760125	91760200	Hand2_rep2_6842,Hand2_rep1_5017
chr1	91770402	91770641	Hand2_rep2_5451,Hand2_rep1_3282
chr1	91799469	91799589	Hand2_rep1_9222,Hand2_rep2_7121
chr1	91826996	91827076	Hand2_rep2_13838,Hand2_rep1_9917
chr1	91830504	91830551	Hand2_rep1_1255,Hand2_rep2_1266
chr1	91952921	91953130	Hand2_rep2_18252,Hand2_rep1_9410
chr1	91963875	91963984	Hand2_rep2_956,Hand2_rep1_929
chr1	91964602	91964827	Hand2_rep1_12362,Hand2_rep2_16342
chr1	91981497	91981567	Hand2_rep2_4896,Hand2_rep1_8922
chr1	92084055	92084093	Hand2_rep1_4177,Hand2_rep2_4855
chr1	92086464	92086566	Hand2_rep1_2175,Hand2_rep2_2428
chr1	92113295	92113456	Hand2_rep1_7458,Hand2_rep2_15667
chr1	92146270	92146363	Hand2_rep1_4312,Hand2_rep2_5766
chr1	92178139	92178519	Hand2_rep2_7723,Hand2_rep1_11115
chr1	92180286	92180647	Hand2_rep1_13366,Hand2_rep2_17128
chr1	92224233	92224518	Hand2_rep2_15906,Hand2_rep1_11681
chr1	92337632	92337722	Hand2_rep1_1353,Hand2_rep2_1669
chr1	92379136	92379348	Hand2_rep2_14516,Hand2_rep1_14800
chr1	92398794	92398891	Hand2_rep1_870,Hand2_rep2_2022
chr1	92683489	92683873	Hand2_rep2_15569,Hand2_rep1_13915
chr1	92687107	92687308	Hand2_rep1_11561,Hand2_rep2_11990
chr1	92708548	92708695	Hand2_rep1_2707,Hand2_rep2_5351
chr1	92772539	92772602	Hand2_rep2_213,Hand2_rep1_246
chr1	92791418	92791602	Hand2_rep1_1776,Hand2_rep2_2314
chr1	93176561	93176760	Hand2_rep2_18425,Hand2_rep1_10695
chr1	93211715	93211755	Hand2_rep2_1263,Hand2_rep1_749
chr1	93235342	93235509	Hand2_rep2_3577,Hand2_rep1_1979
chr1	93267392	93267595	Hand2_rep2_13245,Hand2_rep1_13844
chr1	93618077	93618445	Hand2_rep2_4958,Hand2_rep1_2863
chr1	93635749	93635961	Hand2_rep2_17567,Hand2_rep1_8949
chr1	93660142	93660237	Hand2_rep1_11542,Hand2_rep2_11729
chr1	93881668	93881859	Hand2_rep2_19145,Hand2_rep1_21940
chr1	93948984	93949174	Hand2_rep1_20982,Hand2_rep2_16333
chr1	94008811	94008887	Hand2_rep2_2699,Hand2_rep1_5636
chr1	94488432	94488527	Hand2_rep1_13770,Hand2_rep2_16809
chr1	94712751	94712955	Hand2_rep1_10936,Hand2_rep2_12511
chr1	95312766	95312843	Hand2_rep1_2353,Hand2_rep2_1515
chr1	95450024	95450280	Hand2_rep1_5634,Hand2_rep2_11420
chr1	95582259	95582464	Hand2_rep1_13594,Hand2_rep2_9133
chr1	96801752	96801889	Hand2_rep1_14715,Hand2_rep2_13324
chr1	97611718	97611943	Hand2_rep2_15988,Hand2_rep1_19291
chr1	97650939	97651024	Hand2_rep2_6841,Hand2_rep1_4263
chr1	98173924	98174538	Hand2_rep2_12716,Hand2_rep1_14733,Hand2_rep2_6273
chr1	99871589	99871855	Hand2_rep2_7590,Hand2_rep1_10070
chr1	104912151	104912397	Hand2_rep1_4929,Hand2_rep2_4053
chr1	105117227	105117314	Hand2_rep1_11187,Hand2_rep2_14216
chr1	105175795	105175961	Hand2_rep1_4536,Hand2_rep2_2791
chr1	105738810	105738936	Hand2_rep1_9389,Hand2_rep2_15288
chr1	105813815	105813907	Hand2_rep2_10360,Hand2_rep1_5253
chr1	105971796	105971988	Hand2_rep2_5807,Hand2_rep1_3884
chr1	106182235	106182362	Hand2_rep1_11562,Hand2_rep2_9769
chr1	106204519	106204576	Hand2_rep1_1972,Hand2_rep2_1608
chr1	106208761	106208871	Hand2_rep1_13801,Hand2_rep2_12324
chr1	106351485	106351732	Hand2_rep2_1664,Hand2_rep1_1427
chr1	106354519	106354598	Hand2_rep1_1011,Hand2_rep2_1438
chr1	106553595	106553932	Hand2_rep2_11565,Hand2_rep1_3891
chr1	106612454	106612531	Hand2_rep2_4049,Hand2_rep1_7877
chr1	106722293	106722449	Hand2_rep2_7886,Hand2_rep1_11777
chr1	107079303	107079377	Hand2_rep1_2098,Hand2_rep2_2248
chr1	107291347	107291486	Hand2_rep1_22232,Hand2_rep2_17577
chr1	109186508	109186729	Hand2_rep1_14947,Hand2_rep2_10314
chr1	114716486	114716597	Hand2_rep1_12824,Hand2_rep2_3358
chr1	118402545	118402758	Hand2_rep2_13005,Hand2_rep1_11014
chr1	118904978	118905198	Hand2_rep2_2124,Hand2_rep1_2048
chr1	118913099	118913169	Hand2_rep2_8637,Hand2_rep1_5255
chr1	118916613	118916732	Hand2_rep1_1318,Hand2_rep2_1902
chr1	118936235	118936535	Hand2_rep2_4305,Hand2_rep1_1973
chr1	118982529	118982596	Hand2_rep2_11892,Hand2_rep1_17390
chr1	119033819	119034012	Hand2_rep1_310,Hand2_rep2_306
chr1	119035308	119035437	Hand2_rep1_19130,Hand2_rep2_18671
chr1	119064758	119064948	Hand2_rep2_16733,Hand2_rep1_18575
chr1	119308790	119309009	Hand2_rep2_9414,Hand2_rep1_7738
chr1	119348317	119348408	Hand2_rep2_6992,Hand2_rep1_17597
chr1	119400582	119400693	Hand2_rep1_8408,Hand2_rep2_4094
chr1	119486431	119486609	Hand2_rep2_16904,Hand2_rep1_15230
chr1	121005159	121005442	Hand2_rep1_15857,Hand2_rep2_14285
chr1	121006386	121006576	Hand2_rep1_17297,Hand2_rep2_15225
chr1	121026701	121026846	Hand2_rep1_8803,Hand2_rep2_4957
chr1	121112048	121112278	Hand2_rep1_20441,Hand2_rep2_5927
chr1	121123207	121123347	Hand2_rep2_12718,Hand2_rep1_13870
chr1	121452584	121452640	Hand2_rep1_2731,Hand2_rep2_2245
chr1	123999325	123999414	Hand2_rep1_14868,Hand2_rep2_14441
chr1	124488608	124488669	Hand2_rep2_6677,Hand2_rep1_4300
chr1	125273020	125273267	Hand2_rep2_8949,Hand2_rep1_6973
chr1	125871879	125872139	Hand2_rep2_18716,Hand2_rep1_13386
chr1	126116124	126116303	Hand2_rep1_8544,Hand2_rep2_14298
chr1	126431579	126431771	Hand2_rep2_8070,Hand2_rep1_8101
chr1	126469881	126470020	Hand2_rep1_1881,Hand2_rep2_2088
chr1	126601072	126601285	Hand2_rep1_20486,Hand2_rep2_17902
chr1	126724813	126724954	Hand2_rep1_19440,Hand2_rep2_9632
chr1	126738052	126738224	Hand2_rep2_17207,Hand2_rep1_7449
chr1	127000897	127001009	Hand2_rep2_1093,Hand2_rep1_1470
chr1	127317712	127317828	Hand2_rep2_6168,Hand2_rep1_6267
chr1	127441081	127441197	Hand2_rep1_7609,Hand2_rep2_5361
chr1	127442934	127442969	Hand2_rep2_7851,Hand2_rep1_11001
chr1	127537625	127537697	Hand2_rep1_479,Hand2_rep2_319
chr1	128103197	128103316	Hand2_rep1_7745,Hand2_rep2_4005
chr1	128532744	128532908	Hand2_rep2_7849,Hand2_rep1_6050
chr1	128535734	128535860	Hand2_rep1_12457,Hand2_rep2_16738
chr1	128711298	128711378	Hand2_rep1_12388,Hand2_rep2_8604
chr1	129533224	129533349	Hand2_rep1_1372,Hand2_rep2_765
chr1	130217332	130217626	Hand2_rep2_13025,Hand2_rep1_17280
chr1	130467529	130467861	Hand2_rep1_13768,Hand2_rep2_11915
chr1	130884750	130884774	Hand2_rep2_12971,Hand2_rep1_13884
chr1	130940439	130940596	Hand2_rep2_3674,Hand2_rep1_2032
chr1	130947104	130947344	Hand2_rep1_10513,Hand2_rep2_5933
chr1	131335493	131335901	Hand2_rep2_4100,Hand2_rep1_11975,Hand2_rep1_5492
chr1	131427645	131427790	Hand2_rep2_4483,Hand2_rep1_5631
chr1	131794639	131794894	Hand2_rep1_17293,Hand2_rep2_12838
chr1	132157385	132157538	Hand2_rep2_17117,Hand2_rep1_10120
chr1	132333854	132334005	Hand2_rep1_15396,Hand2_rep2_18023
chr1	132625227	132625309	Hand2_rep2_423,Hand2_rep1_354
chr1	132908713	132908824	Hand2_rep2_5910,Hand2_rep1_4481
chr1	132924972	132925124	Hand2_rep2_4051,Hand2_rep1_3174
chr1	133181373	133181497	Hand2_rep1_11583,Hand2_rep2_16228
chr1	133213210	133213324	Hand2_rep1_4958,Hand2_rep2_7897
chr1	133237708	133237875	Hand2_rep2_13844,Hand2_rep1_7743
chr1	133253503	133253682	Hand2_rep2_3905,Hand2_rep1_7036
chr1	133261103	133261194	Hand2_rep1_10045,Hand2_rep2_12372
chr1	133323318	133323386	Hand2_rep1_4268,Hand2_rep2_8336
chr1	133355832	133356007	Hand2_rep1_1597,Hand2_rep2_4554
chr1	133363444	133363781	Hand2_rep2_12089,Hand2_rep1_4683,Hand2_rep2_11658
chr1	133409133	133409420	Hand2_rep2_7261,Hand2_rep1_10050
chr1	133525803	133525868	Hand2_rep2_1244,Hand2_rep1_3364
chr1	133767278	133767450	Hand2_rep2_9373,Hand2_rep1_11428
chr1	133907994	133908195	Hand2_rep2_9010,Hand2_rep1_9204
chr1	133980413	133980621	Hand2_rep2_8120,Hand2_rep1_3518
chr1	133989052	133989133	Hand2_rep1_9923,Hand2_rep2_8119
chr1	134043281	134043582	Hand2_rep2_14915,Hand2_rep1_11432
chr1	134516651	134516836	Hand2_rep2_8228,Hand2_rep1_15952
chr1	134767458	134767560	Hand2_rep2_8855,Hand2_rep1_5522
chr1	135203165	135203327	Hand2_rep2_6527,Hand2_rep1_4490
chr1	135283091	135283139	Hand2_rep2_4077,Hand2_rep1_2583
chr1	135435908	135436004	Hand2_rep1_1825,Hand2_rep2_2574
chr1	135486453	135486521	Hand2_rep2_11627,Hand2_rep1_15875
chr1	135523908	135524017	Hand2_rep1_16126,Hand2_rep2_11871
chr1	135524351	135524671	Hand2_rep2_8118,Hand2_rep1_7737
chr1	135577931	135578075	Hand2_rep1_12607,Hand2_rep2_8928
chr1	135603502	135603594	Hand2_rep1_1533,Hand2_rep2_2893
chr1	135640024	135640205	Hand2_rep1_7542,Hand2_rep2_11507
chr1	135659482	135659779	Hand2_rep2_12759,Hand2_rep1_11023
chr1	135668380	135668640	Hand2_rep2_3341,Hand2_rep1_3100
chr1	135800578	135800735	Hand2_rep2_1495,Hand2_rep1_1324
chr1	136136448	136136601	Hand2_rep2_15975,Hand2_rep1_9224
chr1	136137503	136137838	Hand2_rep2_19308,Hand2_rep1_22501
chr1	136259903	136259994	Hand2_rep1_6003,Hand2_rep2_18020
chr1	136345953	136346259	Hand2_rep2_18946,Hand2_rep1_13591
chr1	136540859	136540917	Hand2_rep1_6666,Hand2_rep2_3826
chr1	136563293	136563381	Hand2_rep2_4704,Hand2_rep1_4037
chr1	136577302	136577457	Hand2_rep1_11894,Hand2_rep2_8330
chr1	136578038	136578117	Hand2_rep2_231,Hand2_rep1_119
chr1	136587825	136587984	Hand2_rep2_400,Hand2_rep1_370
chr1	136588909	136589305	Hand2_rep2_17099,Hand2_rep1_7372
chr1	136661960	136662107	Hand2_rep2_3792,Hand2_rep1_1658
chr1	136725510	136725614	Hand2_rep1_3612,Hand2_rep2_5211
chr1	136737876	136737921	Hand2_rep2_1114,Hand2_rep1_678
chr1	136840428	136840817	Hand2_rep2_8699,Hand2_rep1_9488
chr1	136942509	136942556	Hand2_rep2_10641,Hand2_rep1_12993
chr1	137225556	137225588	Hand2_rep2_8727,Hand2_rep1_3765
chr1	137270971	137271130	Hand2_rep2_4435,Hand2_rep1_5835
chr1	137315033	137315174	Hand2_rep2_5272,Hand2_rep1_4307
chr1	137332198	137332333	Hand2_rep2_3405,Hand2_rep1_7726
chr1	137361201	137361411	Hand2_rep2_16575,Hand2_rep1_21967
chr1	137373672	137373865	Hand2_rep2_10235,Hand2_rep1_15536
chr1	137516256	137516327	Hand2_rep1_4091,Hand2_rep2_5051
chr1	137545417	137545474	Hand2_rep1_6295,Hand2_rep2_6599
chr1	137560367	137560458	Hand2_rep1_9418,Hand2_rep2_13041
chr1	137570235	137570501	Hand2_rep2_4765,Hand2_rep1_17328
chr1	137686176	137686334	Hand2_rep1_3380,Hand2_rep2_2221
chr1	137774757	137774875	Hand2_rep1_4535,Hand2_rep2_2980
chr1	137832856	137833052	Hand2_rep2_13043,Hand2_rep1_18410
chr1	137900185	137900486	Hand2_rep2_13514,Hand2_rep1_6039
chr1	137927635	137927986	Hand2_rep2_15599,Hand2_rep1_17327
chr1	137972349	137972593	Hand2_rep2_16308,Hand2_rep1_23603
chr1	137973031	137973101	Hand2_rep2_2176,Hand2_rep1_5192
chr1	138002438	138002493	Hand2_rep2_15193,Hand2_rep1_8434
chr1	138037784	138038033	Hand2_rep1_8083,Hand2_rep2_6039
chr1	138247803	138247995	Hand2_rep2_4711,Hand2_rep1_7381
chr1	138415341	138415552	Hand2_rep2_7797,Hand2_rep1_7929
chr1	138510599	138510874	Hand2_rep2_4794,Hand2_rep1_4936
chr1	138571637	138571773	Hand2_rep2_11899,Hand2_rep1_16714
chr1	138596261	138596365	Hand2_rep2_13504,Hand2_rep1_19425
chr1	138622657	138622792	Hand2_rep2_18128,Hand2_rep1_14258
chr1	138719427	138719543	Hand2_rep1_2584,Hand2_rep2_4678
chr1	138720815	138720881	Hand2_rep1_6578,Hand2_rep2_6829
chr1	138963262	138963377	Hand2_rep2_17463,Hand2_rep1_16653
chr1	139192610	139192681	Hand2_rep2_1284,Hand2_rep1_1967
chr1	139346882	139347059	Hand2_rep2_9640,Hand2_rep1_7269
chr1	140831607	140831822	Hand2_rep2_15304,Hand2_rep1_9293
chr1	142930357	142930417	Hand2_rep1_1733,Hand2_rep2_825
chr1	144183737	144183859	Hand2_rep2_1765,Hand2_rep1_2467
chr1	144268091	144268181	Hand2_rep1_12885,Hand2_rep2_13181
chr1	144367597	144367810	Hand2_rep2_2940,Hand2_rep1_4968
chr1	148774067	148774253	Hand2_rep1_14465,Hand2_rep2_13859
chr1	149378247	149378335	Hand2_rep2_12800,Hand2_rep1_4267
chr1	149753713	149753923	Hand2_rep1_9950,Hand2_rep2_3970
chr1	149836619	149836734	Hand2_rep1_751,Hand2_rep2_718
chr1	150043134	150043259	Hand2_rep2_10597,Hand2_rep1_3148
chr1	150165164	150165418	Hand2_rep1_15259,Hand2_rep2_15898
chr1	150537475	150537562	Hand2_rep2_11218,Hand2_rep1_10967
chr1	150600784	150600926	Hand2_rep2_8831,Hand2_rep1_9285
chr1	150680588	150680702	Hand2_rep2_4519,Hand2_rep1_5317
chr1	150769946	150770196	Hand2_rep1_21443,Hand2_rep2_8357
chr1	150775821	150775942	Hand2_rep2_6453,Hand2_rep1_10190
chr1	150804742	150805072	Hand2_rep2_16813,Hand2_rep1_21159
chr1	150814455	150814569	Hand2_rep2_7810,Hand2_rep1_17339
chr1	150824435	150824551	Hand2_rep2_355,Hand2_rep1_457
chr1	150927650	150927877	Hand2_rep1_22675,Hand2_rep2_18218
chr1	150951883	150951974	Hand2_rep1_1081,Hand2_rep2_946
chr1	151031246	151031426	Hand2_rep2_15780,Hand2_rep1_21439
chr1	151092451	151092547	Hand2_rep1_17337,Hand2_rep2_16376
chr1	151096938	151096982	Hand2_rep2_5897,Hand2_rep1_7964
chr1	151102871	151102947	Hand2_rep2_3049,Hand2_rep1_3075
chr1	151141080	151141175	Hand2_rep1_6918,Hand2_rep2_7826
chr1	151676004	151676118	Hand2_rep1_5471,Hand2_rep2_4382
chr1	151686062	151686132	Hand2_rep1_8858,Hand2_rep2_8919
chr1	151695901	151696063	Hand2_rep2_12938,Hand2_rep1_16668
chr1	151709199	151709352	Hand2_rep1_7581,Hand2_rep2_12999
chr1	151763630	151763767	Hand2_rep2_18944,Hand2_rep1_9051
chr1	151945672	151945778	Hand2_rep2_2409,Hand2_rep1_1215
chr1	151946194	151946398	Hand2_rep1_9195,Hand2_rep2_8817
chr1	151999039	151999103	Hand2_rep1_7582,Hand2_rep2_11229
chr1	152189010	152189147	Hand2_rep2_5672,Hand2_rep1_11264
chr1	152354703	152354761	Hand2_rep1_12383,Hand2_rep2_6523
chr1	152362862	152362947	Hand2_rep2_6213,Hand2_rep1_5774
chr1	152459018	152459194	Hand2_rep1_16675,Hand2_rep2_16382
chr1	152514290	152514531	Hand2_rep2_15313,Hand2_rep1_22143
chr1	152556013	152556441	Hand2_rep1_19652,Hand2_rep2_19207
chr1	152582270	152582398	Hand2_rep2_12732,Hand2_rep1_11414
chr1	152583126	152583269	Hand2_rep2_4353,Hand2_rep1_3941
chr1	152656282	152656333	Hand2_rep2_8028,Hand2_rep1_15688
chr1	152687277	152687705	Hand2_rep2_10689,Hand2_rep1_5307
chr1	153024239	153024352	Hand2_rep1_6892,Hand2_rep2_6522
chr1	153126568	153126777	Hand2_rep2_11530,Hand2_rep1_14120
chr1	153155392	153155561	Hand2_rep2_12758,Hand2_rep1_9997
chr1	153180760	153180857	Hand2_rep1_5046,Hand2_rep2_6033
chr1	153283764	153283831	Hand2_rep1_23492,Hand2_rep2_17456
chr1	153317632	153317740	Hand2_rep1_16173,Hand2_rep2_13596
chr1	153321076	153321210	Hand2_rep2_3630,Hand2_rep1_12179
chr1	153653588	153653710	Hand2_rep1_6184,Hand2_rep2_6513
chr1	153669265	153669563	Hand2_rep2_8519,Hand2_rep1_8124
chr1	153685727	153685828	Hand2_rep2_7970,Hand2_rep1_20170
chr1	153709164	153709344	Hand2_rep2_11571,Hand2_rep1_6182
chr1	153963601	153963752	Hand2_rep2_10036,Hand2_rep1_9320
chr1	154175396	154175581	Hand2_rep2_16263,Hand2_rep1_20954
chr1	154555953	154556056	Hand2_rep1_132,Hand2_rep2_184
chr1	154663337	154663477	Hand2_rep1_8119,Hand2_rep2_14421
chr1	154779971	154780441	Hand2_rep1_18489,Hand2_rep2_17978
chr1	154814163	154814318	Hand2_rep1_5352,Hand2_rep2_3184
chr1	154817250	154817397	Hand2_rep2_13459,Hand2_rep1_14061
chr1	154994498	154994604	Hand2_rep2_1325,Hand2_rep1_1581
chr1	154995894	154996066	Hand2_rep1_1347,Hand2_rep2_3955
chr1	155088901	155089033	Hand2_rep2_9916,Hand2_rep1_9702
chr1	155211079	155211196	Hand2_rep1_14839,Hand2_rep2_18195
chr1	155212516	155212704	Hand2_rep2_13586,Hand2_rep1_13086
chr1	155229843	155230007	Hand2_rep2_3375,Hand2_rep1_7499
chr1	155271602	155271725	Hand2_rep2_10012,Hand2_rep1_3964
chr1	155528971	155529012	Hand2_rep1_1422,Hand2_rep2_4169
chr1	156183136	156183269	Hand2_rep2_5301,Hand2_rep1_4217
chr1	156459720	156459863	Hand2_rep1_9712,Hand2_rep2_11811
chr1	156760949	156761022	Hand2_rep2_371,Hand2_rep1_691
chr1	156769507	156769560	Hand2_rep1_8993,Hand2_rep2_10269
chr1	156796324	156796478	Hand2_rep2_9764,Hand2_rep1_12203
chr1	156838137	156838418	Hand2_rep2_17027,Hand2_rep1_21455
chr1	156838651	156838789	Hand2_rep1_22482,Hand2_rep2_15495
chr1	156852610	156852668	Hand2_rep2_738,Hand2_rep1_738
chr1	156953454	156953574	Hand2_rep2_5526,Hand2_rep1_5420
chr1	156964428	156964653	Hand2_rep2_10396,Hand2_rep1_15246
chr1	157443410	157443994	Hand2_rep2_19602,Hand2_rep1_11739,Hand2_rep2_7803
chr1	157462446	157462541	Hand2_rep2_1144,Hand2_rep1_885
chr1	158193178	158193257	Hand2_rep1_13467,Hand2_rep2_19539
chr1	158267017	158267254	Hand2_rep2_18486,Hand2_rep1_16750
chr1	158463740	158464011	Hand2_rep2_1648,Hand2_rep1_4216
chr1	158554297	158554366	Hand2_rep2_1138,Hand2_rep1_1028
chr1	158741380	158741683	Hand2_rep2_15436,Hand2_rep1_22053
chr1	158772144	158772381	Hand2_rep2_9930,Hand2_rep1_5580
chr1	158812035	158812121	Hand2_rep2_5896,Hand2_rep1_12111
chr1	158827885	158828071	Hand2_rep1_9434,Hand2_rep2_5003
chr1	158853035	158853301	Hand2_rep2_5034,Hand2_rep1_8230
chr1	158860296	158860490	Hand2_rep2_14186,Hand2_rep1_11423
chr1	158931510	158931632	Hand2_rep2_11032,Hand2_rep1_11059
chr1	158942860	158943083	Hand2_rep2_15503,Hand2_rep1_14188
chr1	159163239	159163442	Hand2_rep1_16717,Hand2_rep2_5524
chr1	159650763	159650811	Hand2_rep2_12924,Hand2_rep1_7712
chr1	159690622	159690709	Hand2_rep1_21101,Hand2_rep2_9908
chr1	160224359	160224455	Hand2_rep2_330,Hand2_rep1_500
chr1	160313598	160313717	Hand2_rep1_13143,Hand2_rep2_10049
chr1	160417275	160417406	Hand2_rep1_1660,Hand2_rep2_1212
chr1	160615260	160615375	Hand2_rep2_5210,Hand2_rep1_6753
chr1	161033765	161033998	Hand2_rep2_12405,Hand2_rep1_21104
chr1	161195740	161196055	Hand2_rep1_18313,Hand2_rep2_12635
chr1	161359365	161359564	Hand2_rep2_9760,Hand2_rep1_5067
chr1	161380504	161380731	Hand2_rep2_3088,Hand2_rep1_3034
chr1	161556500	161556737	Hand2_rep2_12874,Hand2_rep1_7440
chr1	161797851	161797912	Hand2_rep2_4457,Hand2_rep1_3925
chr1	161984270	161984497	Hand2_rep1_16034,Hand2_rep2_9289
chr1	162005201	162005346	Hand2_rep2_14972,Hand2_rep1_22023
chr1	162008217	162008529	Hand2_rep2_9291,Hand2_rep1_12656
chr1	162017032	162017280	Hand2_rep1_3515,Hand2_rep2_3177
chr1	162018131	162018356	Hand2_rep1_7724,Hand2_rep2_3800
chr1	162020334	162020628	Hand2_rep2_218,Hand2_rep1_575
chr1	162040925	162041023	Hand2_rep2_7817,Hand2_rep1_7029
chr1	162043762	162043823	Hand2_rep1_16892,Hand2_rep2_13965
chr1	162044507	162044573	Hand2_rep1_3028,Hand2_rep2_2708
chr1	162072927	162073091	Hand2_rep2_361,Hand2_rep1_522
chr1	162074715	162074829	Hand2_rep2_2555,Hand2_rep1_4837
chr1	162075084	162075266	Hand2_rep2_13063,Hand2_rep1_14331
chr1	162083375	162083573	Hand2_rep1_3801,Hand2_rep2_3642
chr1	162103453	162103758	Hand2_rep2_8439,Hand2_rep1_13967
chr1	162108216	162108356	Hand2_rep2_503,Hand2_rep1_1224
chr1	162109374	162109572	Hand2_rep2_4939,Hand2_rep1_7398
chr1	162134765	162134934	Hand2_rep2_3466,Hand2_rep1_3960
chr1	162144248	162144348	Hand2_rep1_5683,Hand2_rep2_4170
chr1	162153165	162153363	Hand2_rep1_21399,Hand2_rep2_16183
chr1	162180492	162180583	Hand2_rep1_692,Hand2_rep2_1000
chr1	162184111	162184312	Hand2_rep2_10736,Hand2_rep1_22048
chr1	162215998	162216080	Hand2_rep1_5075,Hand2_rep2_4821
chr1	162216755	162216967	Hand2_rep2_14538,Hand2_rep1_11748
chr1	162217428	162217669	Hand2_rep1_1423,Hand2_rep2_1598
chr1	162243454	162243704	Hand2_rep2_2538,Hand2_rep1_5360
chr1	162254239	162254280	Hand2_rep1_61,Hand2_rep2_15
chr1	162260796	162260843	Hand2_rep2_632,Hand2_rep1_846
chr1	162732035	162732285	Hand2_rep2_11922,Hand2_rep1_11463
chr1	163129593	163129646	Hand2_rep2_2417,Hand2_rep1_3345
chr1	163177215	163177382	Hand2_rep1_4476,Hand2_rep2_7410
chr1	163198270	163198345	Hand2_rep2_4872,Hand2_rep1_6477
chr1	163221883	163222081	Hand2_rep2_1268,Hand2_rep1_1641
chr1	163264622	163264928	Hand2_rep2_5013,Hand2_rep1_5005
chr1	163313470	163313620	Hand2_rep1_796,Hand2_rep2_806
chr1	163314722	163314934	Hand2_rep2_5843,Hand2_rep1_13885
chr1	163320559	163320694	Hand2_rep2_2919,Hand2_rep1_5820
chr1	163358082	163358348	Hand2_rep1_1253,Hand2_rep2_1508
chr1	163360854	163361009	Hand2_rep1_8028,Hand2_rep2_12705
chr1	163383402	163383570	Hand2_rep2_4183,Hand2_rep1_4458
chr1	163423763	163423839	Hand2_rep1_7524,Hand2_rep2_7961
chr1	163536968	163537222	Hand2_rep1_16725,Hand2_rep2_17756
chr1	163542246	163542367	Hand2_rep2_8595,Hand2_rep1_5573
chr1	163563769	163564378	Hand2_rep1_16889,Hand2_rep2_7732,Hand2_rep2_16881
chr1	163571156	163571286	Hand2_rep1_4318,Hand2_rep2_3015
chr1	163574609	163575072	Hand2_rep1_9731,Hand2_rep2_5427
chr1	163630036	163630149	Hand2_rep2_3325,Hand2_rep1_6000
chr1	163657840	163657961	Hand2_rep2_4836,Hand2_rep1_8657
chr1	163779444	163779550	Hand2_rep1_5572,Hand2_rep2_6838
chr1	163844120	163844192	Hand2_rep1_4686,Hand2_rep2_6369
chr1	163853167	163853205	Hand2_rep1_728,Hand2_rep2_853
chr1	163855562	163855704	Hand2_rep2_9296,Hand2_rep1_9592
chr1	163873061	163873142	Hand2_rep1_4024,Hand2_rep2_6961
chr1	163874204	163874338	Hand2_rep2_152,Hand2_rep1_158
chr1	164250826	164250947	Hand2_rep2_12385,Hand2_rep1_11325
chr1	164796480	164796695	Hand2_rep2_10015,Hand2_rep1_13887
chr1	164899004	164899130	Hand2_rep2_11284,Hand2_rep1_9374
chr1	164994338	164994419	Hand2_rep2_16834,Hand2_rep1_13865
chr1	165003335	165003571	Hand2_rep1_20922,Hand2_rep2_11791
chr1	165046856	165046937	Hand2_rep1_122,Hand2_rep2_208
chr1	165114914	165115082	Hand2_rep2_15537,Hand2_rep1_12735
chr1	165205570	165205814	Hand2_rep1_6921,Hand2_rep2_12650
chr1	165321702	165321797	Hand2_rep2_3676,Hand2_rep1_4209
chr1	165327876	165328118	Hand2_rep1_2172,Hand2_rep2_4249
chr1	165498884	165499011	Hand2_rep1_7594,Hand2_rep2_2546
chr1	165639724	165639770	Hand2_rep2_12440,Hand2_rep1_12294
chr1	165693851	165694066	Hand2_rep2_5429,Hand2_rep1_5975
chr1	165702800	165702841	Hand2_rep2_7191,Hand2_rep1_4265
chr1	165748316	165748492	Hand2_rep1_2726,Hand2_rep2_2895
chr1	165786494	165786526	Hand2_rep1_495,Hand2_rep2_250
chr1	166089760	166089962	Hand2_rep1_7200,Hand2_rep2_13489
chr1	166127952	166128008	Hand2_rep1_13749,Hand2_rep2_11078
chr1	166349847	166349924	Hand2_rep2_11874,Hand2_rep1_17917
chr1	166734292	166734523	Hand2_rep1_8554,Hand2_rep2_8837
chr1	167016435	167016531	Hand2_rep2_12383,Hand2_rep1_12281
chr1	167123558	167123719	Hand2_rep2_14985,Hand2_rep1_6179
chr1	167182345	167182487	Hand2_rep2_13250,Hand2_rep1_17926
chr1	167245251	167245358	Hand2_rep2_3481,Hand2_rep1_2208
chr1	167292423	167292524	Hand2_rep1_5981,Hand2_rep2_7185
chr1	167412312	167412446	Hand2_rep1_5012,Hand2_rep2_7957
chr1	167426808	167427131	Hand2_rep2_13087,Hand2_rep1_18596
chr1	167648658	167648879	Hand2_rep2_1106,Hand2_rep1_3048
chr1	167674785	167674953	Hand2_rep1_1505,Hand2_rep2_3135
chr1	167727361	167727485	Hand2_rep2_14705,Hand2_rep1_14141
chr1	167788575	167788947	Hand2_rep1_18250,Hand2_rep2_19198,Hand2_rep1_18248
chr1	168068436	168068859	Hand2_rep1_4614,Hand2_rep2_4548
chr1	168180651	168180795	Hand2_rep2_6962,Hand2_rep1_3412
chr1	168296125	168296313	Hand2_rep2_12091,Hand2_rep1_7985
chr1	168385365	168385576	Hand2_rep2_9145,Hand2_rep1_20316
chr1	168405682	168405812	Hand2_rep1_16846,Hand2_rep2_14260
chr1	168410208	168410236	Hand2_rep1_644,Hand2_rep2_721
chr1	168432025	168432141	Hand2_rep1_9268,Hand2_rep2_18098
chr1	168708665	168708784	Hand2_rep2_1403,Hand2_rep1_1586
chr1	168792076	168792284	Hand2_rep1_10056,Hand2_rep2_10030
chr1	168822405	168822642	Hand2_rep1_7596,Hand2_rep2_2967
chr1	169198959	169199106	Hand2_rep1_11893,Hand2_rep2_10298
chr1	169238351	169238572	Hand2_rep2_10364,Hand2_rep1_9276
chr1	169238579	169238936	Hand2_rep2_6243,Hand2_rep1_8646
chr1	169418005	169418197	Hand2_rep2_8563,Hand2_rep1_8439
chr1	169422437	169422631	Hand2_rep2_15133,Hand2_rep1_8279
chr1	169653728	169653884	Hand2_rep1_11875,Hand2_rep2_11891
chr1	169667329	169667561	Hand2_rep2_2319,Hand2_rep1_2500
chr1	169686401	169686491	Hand2_rep1_4448,Hand2_rep2_3099
chr1	169780596	169780774	Hand2_rep2_7473,Hand2_rep1_15943
chr1	169819602	169819848	Hand2_rep1_2738,Hand2_rep2_3142
chr1	169831831	169831963	Hand2_rep1_2858,Hand2_rep2_3376
chr1	169873250	169873416	Hand2_rep1_5309,Hand2_rep2_2759
chr1	169899271	169899516	Hand2_rep1_11051,Hand2_rep2_6700
chr1	169916813	169916901	Hand2_rep1_4578,Hand2_rep2_3094
chr1	170040285	170040368	Hand2_rep2_6245,Hand2_rep1_16058
chr1	170064088	170064314	Hand2_rep2_5578,Hand2_rep1_2436
chr1	170068557	170068654	Hand2_rep2_3876,Hand2_rep1_3718
chr1	170438946	170439055	Hand2_rep1_6642,Hand2_rep2_11323
chr1	170497825	170497880	Hand2_rep1_4310,Hand2_rep2_10292
chr1	170588234	170588336	Hand2_rep2_10291,Hand2_rep1_10744
chr1	170659288	170659503	Hand2_rep2_18106,Hand2_rep1_8972
chr1	170701265	170701421	Hand2_rep1_11868,Hand2_rep2_6361
chr1	170728452	170728558	Hand2_rep2_1498,Hand2_rep1_1186
chr1	171186320	171186394	Hand2_rep1_236,Hand2_rep2_191
chr1	171189242	171189395	Hand2_rep1_11444,Hand2_rep2_10189
chr1	171193777	171193963	Hand2_rep1_12416,Hand2_rep2_12781
chr1	171281082	171281310	Hand2_rep2_19396,Hand2_rep1_22755
chr1	171411147	171411299	Hand2_rep2_7111,Hand2_rep1_6933
chr1	171412037	171412087	Hand2_rep1_4001,Hand2_rep2_4120
chr1	171503115	171503446	Hand2_rep1_19151,Hand2_rep2_17200
chr1	172027266	172027485	Hand2_rep1_16737,Hand2_rep2_13557
chr1	172132393	172132503	Hand2_rep1_4694,Hand2_rep2_7024
chr1	172221709	172221953	Hand2_rep1_16738,Hand2_rep2_10599
chr1	172618292	172618503	Hand2_rep2_3566,Hand2_rep1_6426
chr1	172629939	172629989	Hand2_rep1_11625,Hand2_rep2_10636
chr1	172634742	172634897	Hand2_rep1_1995,Hand2_rep2_3726
chr1	175035607	175035696	Hand2_rep2_3289,Hand2_rep1_1747
chr1	175079902	175079998	Hand2_rep2_579,Hand2_rep1_1259
chr1	175410482	175410671	Hand2_rep1_7778,Hand2_rep2_8151
chr1	176886536	176886664	Hand2_rep1_21765,Hand2_rep2_14095
chr1	176994792	176994895	Hand2_rep1_7590,Hand2_rep2_7867
chr1	176997041	176997199	Hand2_rep1_5515,Hand2_rep2_8876
chr1	177150794	177150849	Hand2_rep1_6371,Hand2_rep2_5851
chr1	177271763	177272093	Hand2_rep2_15473,Hand2_rep1_21776
chr1	177320591	177320902	Hand2_rep2_12589,Hand2_rep1_15178
chr1	177366252	177366334	Hand2_rep2_3899,Hand2_rep1_9407
chr1	178187384	178187728	Hand2_rep1_22198,Hand2_rep2_18255
chr1	178260119	178260194	Hand2_rep1_15142,Hand2_rep2_12130
chr1	178406261	178406520	Hand2_rep1_17160,Hand2_rep2_18964
chr1	178550630	178550914	Hand2_rep2_12597,Hand2_rep1_19490
chr1	178569229	178569371	Hand2_rep2_6251,Hand2_rep1_7998
chr1	178636447	178636600	Hand2_rep1_6885,Hand2_rep2_10228
chr1	178640001	178640086	Hand2_rep1_9589,Hand2_rep2_11179
chr1	178661625	178661730	Hand2_rep2_1621,Hand2_rep1_1722
chr1	178663595	178663686	Hand2_rep1_6416,Hand2_rep2_3152
chr1	178687401	178687453	Hand2_rep1_9740,Hand2_rep2_8568
chr1	178720983	178721149	Hand2_rep1_3998,Hand2_rep2_4538
chr1	178798582	178798699	Hand2_rep1_19488,Hand2_rep2_16481
chr1	178800276	178800387	Hand2_rep2_1400,Hand2_rep1_1449
chr1	178870928	178871108	Hand2_rep2_11203,Hand2_rep1_7119
chr1	178942289	178942409	Hand2_rep2_16147,Hand2_rep1_18503
chr1	178977579	178977672	Hand2_rep2_17169,Hand2_rep1_16553
chr1	178978703	178978806	Hand2_rep1_1783,Hand2_rep2_2713
chr1	179060370	179060444	Hand2_rep1_4684,Hand2_rep2_2232
chr1	179061878	179062035	Hand2_rep2_2404,Hand2_rep1_3437
chr1	179087636	179087699	Hand2_rep2_1333,Hand2_rep1_1172
chr1	179092105	179092255	Hand2_rep1_3304,Hand2_rep2_1116
chr1	179096908	179097198	Hand2_rep2_6360,Hand2_rep1_9707
chr1	179103471	179103669	Hand2_rep1_4807,Hand2_rep2_4766
chr1	179108130	179108201	Hand2_rep1_86,Hand2_rep2_89
chr1	179147112	179147176	Hand2_rep2_474,Hand2_rep1_794
chr1	179161600	179161635	Hand2_rep1_14088,Hand2_rep2_11741
chr1	179211560	179211596	Hand2_rep1_1307,Hand2_rep2_1731
chr1	179326637	179326756	Hand2_rep2_7480,Hand2_rep1_4020
chr1	179379939	179380033	Hand2_rep1_20530,Hand2_rep2_19340
chr1	179419359	179419645	Hand2_rep2_12975,Hand2_rep1_8197
chr1	179446479	179446786	Hand2_rep2_4775,Hand2_rep1_8823
chr1	179474285	179474382	Hand2_rep1_10821,Hand2_rep2_4671
chr1	179977394	179977688	Hand2_rep1_19217,Hand2_rep2_16341
chr1	180226123	180226461	Hand2_rep1_11692,Hand2_rep2_17881
chr1	180286028	180286202	Hand2_rep2_3690,Hand2_rep1_4175
chr1	180320131	180320318	Hand2_rep2_10253,Hand2_rep1_23327
chr1	180352911	180353012	Hand2_rep2_18115,Hand2_rep1_11933
chr1	180373085	180373176	Hand2_rep2_9473,Hand2_rep1_11688
chr1	180404022	180404218	Hand2_rep2_3956,Hand2_rep1_3044
chr1	180428357	180428400	Hand2_rep1_746,Hand2_rep2_468
chr1	180446913	180447085	Hand2_rep2_14627,Hand2_rep1_12818
chr1	180456509	180456787	Hand2_rep2_14991,Hand2_rep1_12141
chr1	180517219	180517600	Hand2_rep1_12822,Hand2_rep2_12984
chr1	180541983	180542110	Hand2_rep2_535,Hand2_rep1_638
chr1	180870649	180870894	Hand2_rep2_10023,Hand2_rep1_16559
chr1	180913725	180913842	Hand2_rep2_3114,Hand2_rep1_3528
chr1	180945673	180945725	Hand2_rep1_5908,Hand2_rep2_5100
chr1	181143950	181144448	Hand2_rep1_24095,Hand2_rep2_19405
chr1	181262252	181262426	Hand2_rep2_18987,Hand2_rep1_21758
chr1	181918283	181918348	Hand2_rep2_4605,Hand2_rep1_6032
chr1	181935455	181935517	Hand2_rep1_19194,Hand2_rep2_16702
chr1	181988537	181988651	Hand2_rep2_4700,Hand2_rep1_7172
chr1	182082064	182082194	Hand2_rep1_9152,Hand2_rep2_6589
chr1	182088973	182089154	Hand2_rep2_2564,Hand2_rep1_2487
chr1	182110743	182110871	Hand2_rep1_8458,Hand2_rep2_5777
chr1	182145657	182145791	Hand2_rep2_15587,Hand2_rep1_19593
chr1	182406636	182406768	Hand2_rep1_20593,Hand2_rep2_17590
chr1	182412952	182413127	Hand2_rep2_4221,Hand2_rep1_5091
chr1	182520235	182520555	Hand2_rep1_22382,Hand2_rep2_19192
chr1	182574386	182574500	Hand2_rep2_16161,Hand2_rep1_21143
chr1	182620315	182620405	Hand2_rep1_7544,Hand2_rep2_11147
chr1	182740792	182740845	Hand2_rep1_9837,Hand2_rep2_10236
chr1	182983195	182983322	Hand2_rep1_6924,Hand2_rep2_6118
chr1	183072491	183072645	Hand2_rep2_5312,Hand2_rep1_8764
chr1	183084790	183084855	Hand2_rep1_1897,Hand2_rep2_2066
chr1	183102250	183102385	Hand2_rep1_15618,Hand2_rep2_12234
chr1	183148067	183148299	Hand2_rep1_16862,Hand2_rep2_18658
chr1	183183745	183183833	Hand2_rep1_2020,Hand2_rep2_1874
chr1	183188133	183188195	Hand2_rep2_16718,Hand2_rep1_8678
chr1	183548969	183549268	Hand2_rep1_18017,Hand2_rep2_10804
chr1	183715101	183715296	Hand2_rep2_6970,Hand2_rep1_6732
chr1	183772755	183772824	Hand2_rep2_2551,Hand2_rep1_3531
chr1	183783471	183783621	Hand2_rep1_7476,Hand2_rep2_7876
chr1	183794060	183794191	Hand2_rep2_10357,Hand2_rep1_10817
chr1	184057043	184057155	Hand2_rep1_9137,Hand2_rep2_5773
chr1	184096910	184097222	Hand2_rep2_19796,Hand2_rep1_14232
chr1	184244577	184244965	Hand2_rep1_4524,Hand2_rep2_1248
chr1	184308093	184308258	Hand2_rep2_17616,Hand2_rep1_10355
chr1	184335344	184335500	Hand2_rep2_8448,Hand2_rep1_9695
chr1	184782382	184782482	Hand2_rep1_12536,Hand2_rep2_15970
chr1	184871443	184871687	Hand2_rep1_9741,Hand2_rep2_7119
chr1	184958558	184958720	Hand2_rep2_6437,Hand2_rep1_4527
chr1	185103902	185104038	Hand2_rep1_3934,Hand2_rep2_6184
chr1	185389449	185389557	Hand2_rep1_18390,Hand2_rep2_10058
chr1	185606648	185606775	Hand2_rep2_6869,Hand2_rep1_22259
chr1	185653071	185653566	Hand2_rep1_22291,Hand2_rep2_18872
chr1	185657149	185657378	Hand2_rep1_6440,Hand2_rep2_3474
chr1	185666992	185667208	Hand2_rep2_8980,Hand2_rep1_11943
chr1	185730329	185730431	Hand2_rep2_15447,Hand2_rep1_11648
chr1	185731192	185731351	Hand2_rep1_9316,Hand2_rep2_6975
chr1	185741405	185741688	Hand2_rep1_7210,Hand2_rep2_9617
chr1	185836644	185836770	Hand2_rep1_1107,Hand2_rep2_492
chr1	185845209	185845404	Hand2_rep2_13797,Hand2_rep1_23450
chr1	185962697	185962841	Hand2_rep1_2604,Hand2_rep2_1411
chr1	185967758	185967982	Hand2_rep1_8108,Hand2_rep2_4988
chr1	186014217	186014455	Hand2_rep2_17182,Hand2_rep1_10858
chr1	186062995	186063055	Hand2_rep1_6084,Hand2_rep2_2681
chr1	186064630	186064814	Hand2_rep1_11936,Hand2_rep2_7562
chr1	186145292	186145679	Hand2_rep1_12643,Hand2_rep2_13730
chr1	186173764	186173887	Hand2_rep1_347,Hand2_rep2_202
chr1	186223482	186223702	Hand2_rep2_1121,Hand2_rep1_1125
chr1	186237468	186237943	Hand2_rep2_17155,Hand2_rep1_15664,Hand2_rep2_14738
chr1	186271711	186271872	Hand2_rep2_8810,Hand2_rep1_10208
chr1	186321878	186322087	Hand2_rep1_17224,Hand2_rep2_16513
chr1	186357907	186358013	Hand2_rep2_4619,Hand2_rep1_9324
chr1	186409743	186410069	Hand2_rep2_9945,Hand2_rep1_10382
chr1	186419861	186420042	Hand2_rep2_1450,Hand2_rep1_1077
chr1	186425542	186425699	Hand2_rep1_15058,Hand2_rep2_16344
chr1	186540775	186540876	Hand2_rep1_806,Hand2_rep2_755
chr1	186605962	186606063	Hand2_rep1_16581,Hand2_rep2_5085
chr1	186611471	186611577	Hand2_rep1_20522,Hand2_rep2_11233
chr1	186632495	186632750	Hand2_rep2_13159,Hand2_rep1_18431
chr1	186655187	186655451	Hand2_rep1_12947,Hand2_rep2_13155
chr1	186695525	186695576	Hand2_rep2_13350,Hand2_rep1_19798
chr1	186741414	186741562	Hand2_rep2_5383,Hand2_rep1_2936
chr1	187072045	187072347	Hand2_rep2_7928,Hand2_rep1_8416
chr1	187434306	187434430	Hand2_rep1_19580,Hand2_rep2_14747
chr1	187836861	187837070	Hand2_rep2_9094,Hand2_rep1_16955
chr1	187846598	187846934	Hand2_rep2_11878,Hand2_rep1_15608
chr1	188080408	188080437	Hand2_rep1_2035,Hand2_rep2_1567
chr1	188214849	188215164	Hand2_rep1_10547,Hand2_rep2_5508
chr1	188386031	188386074	Hand2_rep1_6822,Hand2_rep2_3456
chr1	188595378	188595443	Hand2_rep2_10315,Hand2_rep1_5798
chr1	188660863	188661037	Hand2_rep2_9052,Hand2_rep1_4168
chr1	188773689	188773844	Hand2_rep2_1931,Hand2_rep1_3535
chr1	188865949	188866142	Hand2_rep1_16108,Hand2_rep2_9774
chr1	188893442	188893631	Hand2_rep1_724,Hand2_rep2_1604
chr1	189067736	189067820	Hand2_rep1_16952,Hand2_rep2_17176
chr1	189403111	189403354	Hand2_rep2_7834,Hand2_rep1_9858
chr1	189430501	189430662	Hand2_rep1_3536,Hand2_rep2_3435
chr1	189994089	189994201	Hand2_rep1_7053,Hand2_rep2_7385
chr1	190148138	190148197	Hand2_rep2_2508,Hand2_rep1_4257
chr1	190326701	190326807	Hand2_rep2_10311,Hand2_rep1_5721
chr1	190562909	190563050	Hand2_rep2_13086,Hand2_rep1_12920
chr1	190669125	190669174	Hand2_rep1_387,Hand2_rep2_869
chr1	191136495	191136605	Hand2_rep1_12524,Hand2_rep2_11544
chr1	191402639	191402739	Hand2_rep1_698,Hand2_rep2_1306
chr1	191420530	191420555	Hand2_rep2_1389,Hand2_rep1_618
chr1	191462206	191462373	Hand2_rep2_3100,Hand2_rep1_1787
chr1	191635477	191635598	Hand2_rep2_1569,Hand2_rep1_1478
chr1	191965449	191965513	Hand2_rep2_4749,Hand2_rep1_2520
chr1	192070277	192070389	Hand2_rep2_13437,Hand2_rep1_11086
chr1	192537397	192537521	Hand2_rep2_4335,Hand2_rep1_4867
chr1	192649282	192649518	Hand2_rep1_15030,Hand2_rep2_7388
chr1	192785764	192785852	Hand2_rep1_7085,Hand2_rep2_3965
chr1	192789869	192790137	Hand2_rep2_6261,Hand2_rep1_9150
chr1	192796333	192796431	Hand2_rep2_150,Hand2_rep1_117
chr1	192799333	192800024	Hand2_rep1_10747,Hand2_rep2_1986,Hand2_rep1_2150
chr1	192822955	192823590	Hand2_rep1_8433,Hand2_rep1_10915,Hand2_rep2_2691
chr1	192834973	192835111	Hand2_rep2_680,Hand2_rep1_773
chr1	192851782	192851911	Hand2_rep2_1882,Hand2_rep1_1263
chr1	192855945	192856078	Hand2_rep2_7565,Hand2_rep1_12089
chr1	193173459	193173565	Hand2_rep1_8930,Hand2_rep2_12099
chr1	193189462	193189511	Hand2_rep2_1751,Hand2_rep1_1279
chr1	193225553	193225724	Hand2_rep2_14018,Hand2_rep1_12083
chr1	193322551	193322718	Hand2_rep2_11647,Hand2_rep1_14483
chr1	193382451	193382580	Hand2_rep2_2703,Hand2_rep1_3246
chr1	193406110	193406239	Hand2_rep2_6014,Hand2_rep1_3633
chr1	193419197	193419331	Hand2_rep1_5228,Hand2_rep2_6629
chr1	193488141	193488271	Hand2_rep2_14514,Hand2_rep1_15171
chr1	193517205	193517584	Hand2_rep2_10993,Hand2_rep1_15882
chr1	193550815	193550976	Hand2_rep1_1954,Hand2_rep2_2455
chr1	193603015	193603109	Hand2_rep1_7492,Hand2_rep2_3430
chr1	193971720	193971758	Hand2_rep2_1359,Hand2_rep1_1269
chr1	193989598	193989749	Hand2_rep2_13138,Hand2_rep1_7327
chr1	194311155	194311307	Hand2_rep2_11286,Hand2_rep1_15342
chr1	194345418	194345695	Hand2_rep1_12082,Hand2_rep2_3257
chr1	194401961	194402121	Hand2_rep2_9433,Hand2_rep1_7791
chr1	194508117	194508175	Hand2_rep2_3450,Hand2_rep1_4203
chr1	194527523	194527766	Hand2_rep1_2843,Hand2_rep2_1544
chr1	194610504	194610709	Hand2_rep1_279,Hand2_rep2_310
chr1	194687761	194687817	Hand2_rep1_7974,Hand2_rep2_4961
chr1	194929955	194930240	Hand2_rep2_10840,Hand2_rep1_19292
chr1	194945502	194945633	Hand2_rep2_9622,Hand2_rep1_9689
chr10	3415032	3415093	Hand2_rep1_1915,Hand2_rep2_2304
chr10	3549505	3549625	Hand2_rep2_8882,Hand2_rep1_11126
chr10	3564039	3564236	Hand2_rep2_18207,Hand2_rep1_15689
chr10	3630945	3631162	Hand2_rep2_1165,Hand2_rep1_946
chr10	3633799	3633952	Hand2_rep1_8096,Hand2_rep2_3865
chr10	3737164	3737354	Hand2_rep1_8642,Hand2_rep2_7581
chr10	3794142	3794284	Hand2_rep2_6214,Hand2_rep1_5330
chr10	3799657	3799825	Hand2_rep1_14122,Hand2_rep2_16393
chr10	4128594	4128761	Hand2_rep2_14158,Hand2_rep1_7254
chr10	4279396	4279618	Hand2_rep1_12979,Hand2_rep2_19086
chr10	4339172	4339308	Hand2_rep1_2152,Hand2_rep2_3369
chr10	4473628	4473657	Hand2_rep2_2352,Hand2_rep1_3079
chr10	5088471	5088650	Hand2_rep2_7244,Hand2_rep1_9151
chr10	5194589	5194943	Hand2_rep2_11631,Hand2_rep1_4606
chr10	5208021	5208230	Hand2_rep2_5443,Hand2_rep1_5884
chr10	5289412	5289639	Hand2_rep2_2306,Hand2_rep1_2022
chr10	5521314	5521462	Hand2_rep2_9953,Hand2_rep1_19193
chr10	6031061	6031520	Hand2_rep2_10312,Hand2_rep1_6621
chr10	6540011	6540321	Hand2_rep2_11953,Hand2_rep1_7840
chr10	6762521	6762670	Hand2_rep1_11678,Hand2_rep2_14816
chr10	6762925	6762990	Hand2_rep2_14899,Hand2_rep1_16866
chr10	6848509	6848607	Hand2_rep2_550,Hand2_rep1_904
chr10	6916687	6916931	Hand2_rep2_14337,Hand2_rep1_20420
chr10	7103886	7103984	Hand2_rep1_12808,Hand2_rep2_11546
chr10	7117929	7117991	Hand2_rep1_123,Hand2_rep2_201
chr10	7150340	7150441	Hand2_rep1_15159,Hand2_rep2_7750
chr10	7911329	7911516	Hand2_rep1_23893,Hand2_rep2_16443
chr10	8091663	8091754	Hand2_rep2_6461,Hand2_rep1_6225
chr10	8092237	8092409	Hand2_rep1_22636,Hand2_rep2_8136
chr10	8762210	8762331	Hand2_rep2_6787,Hand2_rep1_13530
chr10	8814319	8814407	Hand2_rep1_3783,Hand2_rep2_2753
chr10	8821242	8821434	Hand2_rep2_12072,Hand2_rep1_5007
chr10	8853470	8853596	Hand2_rep2_3485,Hand2_rep1_4071
chr10	8854810	8855102	Hand2_rep2_16484,Hand2_rep1_7519
chr10	8881733	8881886	Hand2_rep1_14578,Hand2_rep2_16439
chr10	8955924	8956108	Hand2_rep2_5303,Hand2_rep1_7790
chr10	8960984	8961063	Hand2_rep2_422,Hand2_rep1_277
chr10	8968198	8968309	Hand2_rep1_7324,Hand2_rep2_9730
chr10	8998482	8998617	Hand2_rep1_2745,Hand2_rep2_4778
chr10	9007825	9008015	Hand2_rep1_18828,Hand2_rep2_14315
chr10	9019556	9019754	Hand2_rep2_15203,Hand2_rep1_12809
chr10	9272385	9272462	Hand2_rep2_3365,Hand2_rep1_1704
chr10	9272977	9273187	Hand2_rep1_11456,Hand2_rep2_6489
chr10	9327541	9327642	Hand2_rep1_23892,Hand2_rep2_19104
chr10	9607304	9607392	Hand2_rep2_9803,Hand2_rep1_4601
chr10	9740861	9740905	Hand2_rep2_3585,Hand2_rep1_1523
chr10	9785796	9785898	Hand2_rep2_4531,Hand2_rep1_10229
chr10	9957806	9957861	Hand2_rep2_4104,Hand2_rep1_5890
chr10	10557025	10557104	Hand2_rep2_14592,Hand2_rep1_6733
chr10	10699859	10700175	Hand2_rep2_17681,Hand2_rep1_16864
chr10	10847735	10848017	Hand2_rep2_8833,Hand2_rep1_12499
chr10	11739725	11740157	Hand2_rep2_5806,Hand2_rep1_5257,Hand2_rep2_14694
chr10	12487100	12487247	Hand2_rep2_8452,Hand2_rep1_16086
chr10	12529820	12529966	Hand2_rep2_3486,Hand2_rep1_3923
chr10	12848673	12848786	Hand2_rep1_3022,Hand2_rep2_1556
chr10	12915921	12916093	Hand2_rep2_5330,Hand2_rep1_2835
chr10	12964102	12964358	Hand2_rep2_15699,Hand2_rep1_16564
chr10	13090700	13090781	Hand2_rep2_4282,Hand2_rep1_4636
chr10	13168418	13168490	Hand2_rep1_18825,Hand2_rep2_16424
chr10	13171211	13171269	Hand2_rep1_2736,Hand2_rep2_3887
chr10	13172808	13173060	Hand2_rep1_5104,Hand2_rep2_5250
chr10	13178360	13178453	Hand2_rep1_4385,Hand2_rep2_3106
chr10	13180260	13180423	Hand2_rep2_4095,Hand2_rep1_5223
chr10	13186904	13187035	Hand2_rep2_9199,Hand2_rep1_21130
chr10	13197229	13197380	Hand2_rep1_3679,Hand2_rep2_1580
chr10	13212307	13212410	Hand2_rep1_2309,Hand2_rep2_3368
chr10	13212996	13213138	Hand2_rep2_4367,Hand2_rep1_4886
chr10	13283505	13283577	Hand2_rep2_14061,Hand2_rep1_11133
chr10	13350687	13350866	Hand2_rep2_15460,Hand2_rep1_11913
chr10	13376466	13376608	Hand2_rep1_685,Hand2_rep2_528
chr10	13394566	13394644	Hand2_rep1_2015,Hand2_rep2_2054
chr10	13419140	13419239	Hand2_rep1_2259,Hand2_rep2_2447
chr10	13436089	13436243	Hand2_rep2_5752,Hand2_rep1_4493
chr10	13588578	13588755	Hand2_rep2_4930,Hand2_rep1_2730
chr10	13712864	13713166	Hand2_rep2_16773,Hand2_rep1_12795
chr10	15395354	15395409	Hand2_rep2_3868,Hand2_rep1_8312
chr10	16637641	16637750	Hand2_rep2_8324,Hand2_rep1_10207
chr10	16804186	16804239	Hand2_rep1_8892,Hand2_rep2_6221
chr10	17074879	17075024	Hand2_rep2_4351,Hand2_rep1_11711
chr10	17095888	17096284	Hand2_rep2_9809,Hand2_rep1_9349
chr10	17176210	17176475	Hand2_rep2_12477,Hand2_rep1_15673
chr10	17253209	17253319	Hand2_rep1_18012,Hand2_rep2_18984
chr10	17356277	17356406	Hand2_rep1_6917,Hand2_rep2_5832
chr10	17631968	17632118	Hand2_rep1_8313,Hand2_rep2_6923
chr10	17655984	17656068	Hand2_rep2_7690,Hand2_rep1_4788
chr10	18005409	18005614	Hand2_rep2_10994,Hand2_rep1_21736
chr10	18068112	18068225	Hand2_rep1_9868,Hand2_rep2_2382
chr10	18146001	18146262	Hand2_rep1_19615,Hand2_rep2_18201
chr10	18168262	18168466	Hand2_rep2_12479,Hand2_rep1_8095
chr10	18341660	18341785	Hand2_rep2_5300,Hand2_rep1_2737
chr10	18436136	18436265	Hand2_rep2_9985,Hand2_rep1_20578
chr10	18494405	18494616	Hand2_rep1_9610,Hand2_rep2_7558
chr10	18646952	18647063	Hand2_rep1_13745,Hand2_rep2_15046
chr10	18816633	18816720	Hand2_rep2_2182,Hand2_rep1_2088
chr10	19415116	19415260	Hand2_rep1_6059,Hand2_rep2_4176
chr10	19494447	19494640	Hand2_rep1_6820,Hand2_rep2_11941
chr10	19935872	19936056	Hand2_rep1_24018,Hand2_rep2_13008
chr10	19937100	19937285	Hand2_rep1_12593,Hand2_rep2_17661
chr10	19943641	19943935	Hand2_rep2_18038,Hand2_rep1_19270
chr10	20290533	20290615	Hand2_rep2_15848,Hand2_rep1_14611
chr10	20401344	20401473	Hand2_rep1_11042,Hand2_rep2_9810
chr10	20487101	20487187	Hand2_rep2_3710,Hand2_rep1_3381
chr10	20508357	20508693	Hand2_rep2_16124,Hand2_rep1_22331
chr10	20516846	20516946	Hand2_rep2_15850,Hand2_rep1_18382
chr10	20556395	20556752	Hand2_rep1_12584,Hand2_rep2_10534
chr10	20633133	20633196	Hand2_rep2_15839,Hand2_rep1_9046
chr10	20636279	20636678	Hand2_rep1_18848,Hand2_rep2_18455
chr10	20657512	20657550	Hand2_rep2_7225,Hand2_rep1_6496
chr10	20839820	20839930	Hand2_rep1_5529,Hand2_rep2_3628
chr10	20841721	20841804	Hand2_rep2_1157,Hand2_rep1_2185
chr10	21415623	21415813	Hand2_rep1_21007,Hand2_rep2_9382
chr10	21587119	21587266	Hand2_rep1_5342,Hand2_rep2_1843
chr10	21748263	21748346	Hand2_rep1_7700,Hand2_rep2_10106
chr10	21792613	21792761	Hand2_rep2_12484,Hand2_rep1_16095
chr10	21793670	21793854	Hand2_rep1_10240,Hand2_rep2_3760
chr10	21824822	21825045	Hand2_rep2_19806,Hand2_rep1_18849
chr10	21843286	21843444	Hand2_rep1_3127,Hand2_rep2_1919
chr10	21884475	21884603	Hand2_rep2_6180,Hand2_rep1_7856
chr10	21911380	21911506	Hand2_rep2_4639,Hand2_rep1_12986
chr10	21916050	21916198	Hand2_rep2_10105,Hand2_rep1_9616
chr10	22150524	22150566	Hand2_rep1_9618,Hand2_rep2_9811
chr10	22159498	22159539	Hand2_rep2_4135,Hand2_rep1_5560
chr10	22348158	22348284	Hand2_rep2_8497,Hand2_rep1_7331
chr10	22642956	22643058	Hand2_rep2_6307,Hand2_rep1_4640
chr10	22676164	22676245	Hand2_rep1_2942,Hand2_rep2_1942
chr10	22816457	22816549	Hand2_rep2_15419,Hand2_rep1_15409
chr10	22908681	22908753	Hand2_rep1_810,Hand2_rep2_679
chr10	22917788	22917924	Hand2_rep1_23535,Hand2_rep2_9993
chr10	23209418	23209511	Hand2_rep1_4176,Hand2_rep2_2571
chr10	23215844	23215932	Hand2_rep2_3647,Hand2_rep1_3584
chr10	23403304	23403399	Hand2_rep1_13696,Hand2_rep2_8364
chr10	23547800	23548037	Hand2_rep1_15637,Hand2_rep2_14256
chr10	23562394	23562500	Hand2_rep2_91,Hand2_rep1_89
chr10	23602618	23602692	Hand2_rep1_20603,Hand2_rep2_17669
chr10	23610122	23610325	Hand2_rep1_12231,Hand2_rep2_13455
chr10	23612108	23612317	Hand2_rep2_6016,Hand2_rep1_8163
chr10	23672351	23672483	Hand2_rep2_9812,Hand2_rep1_8846
chr10	23711009	23711163	Hand2_rep1_16098,Hand2_rep2_12797
chr10	23711793	23711886	Hand2_rep2_2138,Hand2_rep1_1813
chr10	23754536	23754750	Hand2_rep2_14565,Hand2_rep1_23479
chr10	23935069	23935198	Hand2_rep2_16816,Hand2_rep1_16099
chr10	24164427	24164565	Hand2_rep2_2484,Hand2_rep1_2485
chr10	24458673	24458803	Hand2_rep2_6643,Hand2_rep1_3630
chr10	24485801	24485885	Hand2_rep1_553,Hand2_rep2_768
chr10	24573694	24573858	Hand2_rep1_13269,Hand2_rep2_16400
chr10	24637309	24637369	Hand2_rep2_19160,Hand2_rep1_20614
chr10	24819716	24819824	Hand2_rep2_2160,Hand2_rep1_2266
chr10	24927158	24927252	Hand2_rep1_1234,Hand2_rep2_1790
chr10	25063322	25063413	Hand2_rep2_10572,Hand2_rep1_14512
chr10	25261177	25261392	Hand2_rep1_22008,Hand2_rep2_9813
chr10	25372539	25372741	Hand2_rep2_3079,Hand2_rep1_4402
chr10	25433036	25433151	Hand2_rep2_9241,Hand2_rep1_16582
chr10	25437072	25437201	Hand2_rep2_9039,Hand2_rep1_10393
chr10	25513787	25514053	Hand2_rep2_6578,Hand2_rep1_4784
chr10	25555078	25555210	Hand2_rep2_13305,Hand2_rep1_6982
chr10	25580082	25580325	Hand2_rep2_19164,Hand2_rep1_14082
chr10	25643370	25643737	Hand2_rep1_2865,Hand2_rep2_2755
chr10	25651367	25651527	Hand2_rep2_7381,Hand2_rep1_13806
chr10	25790408	25790613	Hand2_rep2_6010,Hand2_rep1_9061
chr10	25804534	25804651	Hand2_rep1_5302,Hand2_rep2_3202
chr10	25905879	25906001	Hand2_rep1_5771,Hand2_rep2_7726
chr10	26032164	26032254	Hand2_rep1_2275,Hand2_rep2_748
chr10	26492227	26492362	Hand2_rep2_407,Hand2_rep1_308
chr10	26814404	26814547	Hand2_rep1_10869,Hand2_rep2_4332
chr10	27022827	27022948	Hand2_rep2_5626,Hand2_rep1_2814
chr10	27160350	27160464	Hand2_rep1_11640,Hand2_rep2_5287
chr10	27194013	27194220	Hand2_rep1_18886,Hand2_rep2_14564
chr10	27616050	27616180	Hand2_rep2_12826,Hand2_rep1_18358
chr10	27652778	27652950	Hand2_rep1_9920,Hand2_rep2_7305
chr10	27738218	27738338	Hand2_rep2_3900,Hand2_rep1_1567
chr10	28225463	28225814	Hand2_rep1_6122,Hand2_rep2_5286
chr10	28311370	28311507	Hand2_rep1_939,Hand2_rep2_1839
chr10	28369861	28369947	Hand2_rep2_314,Hand2_rep1_135
chr10	29211622	29211670	Hand2_rep1_1880,Hand2_rep2_2117
chr10	29479506	29479702	Hand2_rep2_13111,Hand2_rep1_9031
chr10	29525834	29525894	Hand2_rep1_1112,Hand2_rep2_751
chr10	29635929	29636029	Hand2_rep1_20700,Hand2_rep2_13819
chr10	29659453	29659679	Hand2_rep1_19782,Hand2_rep2_9188
chr10	29673781	29673904	Hand2_rep1_849,Hand2_rep2_575
chr10	29719186	29719278	Hand2_rep2_5946,Hand2_rep1_6509
chr10	29852614	29852755	Hand2_rep1_12946,Hand2_rep2_11769
chr10	29897616	29897653	Hand2_rep1_5016,Hand2_rep2_5336
chr10	29915661	29915821	Hand2_rep2_12336,Hand2_rep1_17988
chr10	29921613	29921728	Hand2_rep2_5388,Hand2_rep1_7675
chr10	30034287	30034383	Hand2_rep1_8105,Hand2_rep2_10587
chr10	30280092	30280214	Hand2_rep2_1989,Hand2_rep1_1573
chr10	30327693	30328117	Hand2_rep1_11208,Hand2_rep2_13598
chr10	30328559	30328635	Hand2_rep1_4210,Hand2_rep2_5108
chr10	30618094	30618547	Hand2_rep2_16016,Hand2_rep1_20532
chr10	30952568	30952689	Hand2_rep2_6239,Hand2_rep1_7478
chr10	30977119	30977216	Hand2_rep1_10924,Hand2_rep2_3772
chr10	31173076	31173282	Hand2_rep2_9008,Hand2_rep1_8140
chr10	31256899	31257104	Hand2_rep2_4781,Hand2_rep1_5986
chr10	31328049	31328119	Hand2_rep2_8249,Hand2_rep1_9632
chr10	31357841	31357928	Hand2_rep2_3260,Hand2_rep1_2896
chr10	34019483	34019902	Hand2_rep2_16010,Hand2_rep1_15559
chr10	34105456	34105617	Hand2_rep1_20339,Hand2_rep2_10375
chr10	34111870	34112097	Hand2_rep1_21726,Hand2_rep2_9578
chr10	34176294	34176410	Hand2_rep2_5507,Hand2_rep1_3605
chr10	34258237	34258341	Hand2_rep2_16674,Hand2_rep1_18450
chr10	34297346	34297453	Hand2_rep1_23092,Hand2_rep2_19771
chr10	35186684	35186848	Hand2_rep2_15679,Hand2_rep1_22012
chr10	35607696	35607840	Hand2_rep2_17705,Hand2_rep1_14157
chr10	36834673	36834970	Hand2_rep1_8107,Hand2_rep2_7985
chr10	37035257	37035383	Hand2_rep2_8480,Hand2_rep1_14795
chr10	37082748	37082789	Hand2_rep1_16106,Hand2_rep2_14877
chr10	37357352	37357471	Hand2_rep1_8753,Hand2_rep2_15198
chr10	37358366	37358653	Hand2_rep2_6337,Hand2_rep1_10141
chr10	37383849	37383959	Hand2_rep1_16954,Hand2_rep2_13247
chr10	37397420	37397578	Hand2_rep2_814,Hand2_rep1_423
chr10	37616454	37616659	Hand2_rep1_15276,Hand2_rep2_6350
chr10	37626927	37627149	Hand2_rep2_14399,Hand2_rep1_11633
chr10	37636744	37637528	Hand2_rep2_17852,Hand2_rep1_18037,Hand2_rep2_5382,Hand2_rep1_7868
chr10	37716997	37717150	Hand2_rep1_22033,Hand2_rep2_18273
chr10	37861157	37861321	Hand2_rep2_2558,Hand2_rep1_1584
chr10	38118690	38118764	Hand2_rep2_2375,Hand2_rep1_3836
chr10	38362454	38362662	Hand2_rep2_10996,Hand2_rep1_12767
chr10	38447285	38447443	Hand2_rep2_4043,Hand2_rep1_6681
chr10	38459023	38459237	Hand2_rep1_19050,Hand2_rep2_8472
chr10	38540828	38540960	Hand2_rep1_15220,Hand2_rep2_12370
chr10	38823805	38823927	Hand2_rep1_5394,Hand2_rep2_3377
chr10	39029965	39030274	Hand2_rep2_13131,Hand2_rep1_15674
chr10	39133716	39133874	Hand2_rep2_7120,Hand2_rep1_6124
chr10	39169923	39170071	Hand2_rep2_2667,Hand2_rep1_2897
chr10	39220296	39220339	Hand2_rep1_19742,Hand2_rep2_8190
chr10	39321241	39321382	Hand2_rep1_11632,Hand2_rep2_9970
chr10	39346240	39346305	Hand2_rep1_1069,Hand2_rep2_1550
chr10	39526368	39526499	Hand2_rep1_3542,Hand2_rep2_3935
chr10	39534445	39534556	Hand2_rep2_9333,Hand2_rep1_7222
chr10	39563319	39563570	Hand2_rep1_3098,Hand2_rep2_1561
chr10	39564105	39564286	Hand2_rep1_4755,Hand2_rep2_4198
chr10	39614707	39614835	Hand2_rep1_525,Hand2_rep2_507
chr10	39622011	39622183	Hand2_rep2_12460,Hand2_rep1_15687
chr10	39630100	39630198	Hand2_rep1_15685,Hand2_rep2_17720
chr10	39653797	39654138	Hand2_rep2_11401,Hand2_rep1_5527
chr10	39659413	39659518	Hand2_rep1_1374,Hand2_rep2_1756
chr10	40069344	40069470	Hand2_rep2_8142,Hand2_rep1_12152
chr10	40151964	40152210	Hand2_rep2_14902,Hand2_rep1_7176
chr10	40228090	40228160	Hand2_rep2_9409,Hand2_rep1_10691
chr10	40374865	40375247	Hand2_rep1_18872,Hand2_rep2_11858
chr10	40425460	40425680	Hand2_rep1_12961,Hand2_rep2_15432
chr10	40582863	40583032	Hand2_rep2_2816,Hand2_rep1_3036
chr10	40637465	40637652	Hand2_rep2_12462,Hand2_rep1_5437
chr10	40685638	40685718	Hand2_rep1_3175,Hand2_rep2_8141
chr10	40689503	40689575	Hand2_rep1_16061,Hand2_rep2_17718
chr10	40732501	40732583	Hand2_rep1_12962,Hand2_rep2_8740
chr10	40758699	40758758	Hand2_rep1_778,Hand2_rep2_600
chr10	41292985	41293129	Hand2_rep2_3155,Hand2_rep1_3316
chr10	41302658	41302992	Hand2_rep2_16955,Hand2_rep1_19748
chr10	41573583	41573667	Hand2_rep2_5060,Hand2_rep1_6506
chr10	41614392	41614639	Hand2_rep1_22245,Hand2_rep2_11239
chr10	41648678	41648805	Hand2_rep1_4589,Hand2_rep2_2835
chr10	41652561	41652644	Hand2_rep1_12103,Hand2_rep2_10682
chr10	41894815	41894877	Hand2_rep2_6120,Hand2_rep1_7682
chr10	42004731	42004955	Hand2_rep2_6652,Hand2_rep1_3984
chr10	42044357	42044550	Hand2_rep1_20381,Hand2_rep2_13971
chr10	42123010	42123267	Hand2_rep1_6552,Hand2_rep2_4504
chr10	42170355	42170547	Hand2_rep2_7466,Hand2_rep1_5794
chr10	42195298	42195546	Hand2_rep2_7074,Hand2_rep1_5972
chr10	42196638	42196868	Hand2_rep1_2024,Hand2_rep2_2323
chr10	42199555	42199665	Hand2_rep1_10008,Hand2_rep2_8698
chr10	42203382	42203535	Hand2_rep1_7316,Hand2_rep2_10927
chr10	42215831	42215939	Hand2_rep2_7468,Hand2_rep1_7285
chr10	42707184	42707259	Hand2_rep1_8722,Hand2_rep2_4269
chr10	42859856	42860089	Hand2_rep2_9048,Hand2_rep1_11668
chr10	42933030	42933342	Hand2_rep2_12083,Hand2_rep1_3787
chr10	42949585	42949688	Hand2_rep1_6663,Hand2_rep2_5736
chr10	43002964	43003428	Hand2_rep2_18501,Hand2_rep1_22189
chr10	43043364	43043498	Hand2_rep2_1722,Hand2_rep1_3233
chr10	43124697	43124831	Hand2_rep2_14997,Hand2_rep1_10571
chr10	43252325	43252523	Hand2_rep2_4790,Hand2_rep1_11171
chr10	43379160	43379319	Hand2_rep2_3976,Hand2_rep1_5790
chr10	43421137	43421191	Hand2_rep1_10129,Hand2_rep2_5817
chr10	43483695	43483754	Hand2_rep2_1520,Hand2_rep1_975
chr10	43578552	43578780	Hand2_rep2_4128,Hand2_rep1_1387
chr10	43649283	43649383	Hand2_rep2_369,Hand2_rep1_169
chr10	43718943	43719038	Hand2_rep2_2712,Hand2_rep1_3263
chr10	43722842	43723156	Hand2_rep1_5708,Hand2_rep2_5656
chr10	43733546	43733886	Hand2_rep2_15553,Hand2_rep1_20191
chr10	43740185	43740338	Hand2_rep2_1668,Hand2_rep1_1219
chr10	43917408	43917524	Hand2_rep2_425,Hand2_rep1_920
chr10	44600037	44600224	Hand2_rep2_16630,Hand2_rep1_13663
chr10	44600699	44600820	Hand2_rep2_6145,Hand2_rep1_13662
chr10	44765171	44765376	Hand2_rep2_11638,Hand2_rep1_9523
chr10	44785417	44785573	Hand2_rep2_4723,Hand2_rep1_7301
chr10	44987470	44987907	Hand2_rep1_8901,Hand2_rep2_5332
chr10	45230075	45230229	Hand2_rep2_1641,Hand2_rep1_1022
chr10	45807067	45807403	Hand2_rep2_11934,Hand2_rep1_11657
chr10	45819063	45819264	Hand2_rep2_14854,Hand2_rep1_8146
chr10	45893944	45894012	Hand2_rep2_171,Hand2_rep1_45
chr10	51678314	51678592	Hand2_rep2_18965,Hand2_rep1_14727
chr10	51825569	51825706	Hand2_rep2_16250,Hand2_rep1_20207
chr10	51949502	51949555	Hand2_rep1_20218,Hand2_rep2_13283
chr10	51956509	51956613	Hand2_rep2_9352,Hand2_rep1_6273
chr10	53398612	53398717	Hand2_rep2_1762,Hand2_rep1_1877
chr10	53444925	53445024	Hand2_rep1_11174,Hand2_rep2_8532
chr10	53594199	53594338	Hand2_rep1_4561,Hand2_rep2_4223
chr10	53941534	53941712	Hand2_rep2_6135,Hand2_rep1_5787
chr10	54017973	54018055	Hand2_rep2_5759,Hand2_rep1_7329
chr10	54059064	54059148	Hand2_rep2_6775,Hand2_rep1_4304
chr10	54249668	54249787	Hand2_rep2_16244,Hand2_rep1_23601
chr10	55100752	55100786	Hand2_rep2_15112,Hand2_rep1_14375
chr10	55389927	55390081	Hand2_rep2_7566,Hand2_rep1_9667
chr10	56114986	56115288	Hand2_rep1_5623,Hand2_rep2_11109
chr10	56393330	56393458	Hand2_rep2_13681,Hand2_rep1_15264
chr10	56424330	56424465	Hand2_rep2_6620,Hand2_rep1_8147
chr10	56431869	56431996	Hand2_rep1_4367,Hand2_rep2_5467
chr10	56531406	56531497	Hand2_rep1_5057,Hand2_rep2_7292
chr10	56588295	56588546	Hand2_rep2_1948,Hand2_rep1_1557
chr10	56605734	56605892	Hand2_rep2_2504,Hand2_rep1_2966
chr10	56610688	56610905	Hand2_rep2_1640,Hand2_rep1_2377
chr10	56720186	56720316	Hand2_rep1_13395,Hand2_rep2_9994
chr10	56806881	56807313	Hand2_rep1_9729,Hand2_rep2_6847
chr10	56839165	56839351	Hand2_rep2_1735,Hand2_rep1_2786
chr10	56893230	56893306	Hand2_rep1_8828,Hand2_rep2_12285
chr10	56979673	56979842	Hand2_rep1_17226,Hand2_rep2_14173
chr10	56993012	56993113	Hand2_rep1_5703,Hand2_rep2_6508
chr10	57040257	57040423	Hand2_rep1_6500,Hand2_rep2_5030
chr10	57062804	57062981	Hand2_rep2_16623,Hand2_rep1_20414
chr10	57126081	57126237	Hand2_rep2_11422,Hand2_rep1_19788
chr10	57163382	57163518	Hand2_rep2_12286,Hand2_rep1_15304
chr10	57253921	57254435	Hand2_rep2_18045,Hand2_rep1_18082
chr10	57597093	57597211	Hand2_rep1_223,Hand2_rep2_268
chr10	57796031	57796155	Hand2_rep2_9823,Hand2_rep1_6006
chr10	58382668	58383042	Hand2_rep1_7676,Hand2_rep2_3987
chr10	58651234	58651400	Hand2_rep1_13030,Hand2_rep2_10934
chr10	58797704	58797913	Hand2_rep1_18076,Hand2_rep2_19749
chr10	58914775	58915071	Hand2_rep2_12026,Hand2_rep1_19784
chr10	58932591	58932690	Hand2_rep2_2389,Hand2_rep1_2639
chr10	58953120	58953232	Hand2_rep1_1633,Hand2_rep2_1234
chr10	59131940	59132101	Hand2_rep2_8702,Hand2_rep1_11180
chr10	59221110	59221226	Hand2_rep2_10935,Hand2_rep1_22601
chr10	59259671	59259849	Hand2_rep1_13032,Hand2_rep2_7672
chr10	59287761	59287924	Hand2_rep2_7015,Hand2_rep1_3516
chr10	59484391	59484580	Hand2_rep1_23051,Hand2_rep2_17302
chr10	59637678	59637791	Hand2_rep2_9226,Hand2_rep1_12091
chr10	59756721	59756862	Hand2_rep1_7874,Hand2_rep2_11682
chr10	59899590	59899789	Hand2_rep1_21710,Hand2_rep2_16002
chr10	59916643	59916690	Hand2_rep2_9100,Hand2_rep1_11653
chr10	59920509	59920671	Hand2_rep1_15291,Hand2_rep2_12289
chr10	59953052	59953155	Hand2_rep2_19654,Hand2_rep1_8297
chr10	60212889	60213085	Hand2_rep2_18504,Hand2_rep1_14842
chr10	60283776	60283836	Hand2_rep2_15811,Hand2_rep1_7314
chr10	60285680	60285850	Hand2_rep1_9491,Hand2_rep2_6843
chr10	60350729	60350995	Hand2_rep1_9127,Hand2_rep2_6772
chr10	60438442	60438565	Hand2_rep2_6383,Hand2_rep1_16069
chr10	60693967	60694139	Hand2_rep1_6214,Hand2_rep2_2867
chr10	60794478	60794692	Hand2_rep1_11181,Hand2_rep2_18969
chr10	60811771	60811954	Hand2_rep1_12159,Hand2_rep2_16369
chr10	60814765	60814933	Hand2_rep1_18887,Hand2_rep2_17301
chr10	60815952	60816111	Hand2_rep2_4028,Hand2_rep1_4225
chr10	60838959	60839047	Hand2_rep1_9480,Hand2_rep2_17439
chr10	60857727	60857869	Hand2_rep1_11359,Hand2_rep2_7374
chr10	60878129	60878330	Hand2_rep1_6495,Hand2_rep2_10738
chr10	60893056	60893327	Hand2_rep2_5422,Hand2_rep1_2627
chr10	60918059	60918244	Hand2_rep2_5809,Hand2_rep1_5615
chr10	60955617	60955791	Hand2_rep1_8189,Hand2_rep2_14681
chr10	60976582	60976751	Hand2_rep1_4538,Hand2_rep2_3945
chr10	61226816	61226949	Hand2_rep2_920,Hand2_rep1_368
chr10	61234394	61234479	Hand2_rep2_11564,Hand2_rep1_12085
chr10	61240413	61240457	Hand2_rep2_5029,Hand2_rep1_4533
chr10	61241059	61241262	Hand2_rep1_12084,Hand2_rep2_6389
chr10	61274996	61275191	Hand2_rep2_10932,Hand2_rep1_16520
chr10	61308853	61309055	Hand2_rep1_9379,Hand2_rep2_11964
chr10	61312254	61312409	Hand2_rep1_7090,Hand2_rep2_8933
chr10	61346427	61346774	Hand2_rep1_10887,Hand2_rep2_10891
chr10	61495371	61495817	Hand2_rep1_12882,Hand2_rep2_9229
chr10	61825550	61825653	Hand2_rep2_3083,Hand2_rep1_6699
chr10	61827288	61827441	Hand2_rep2_7549,Hand2_rep1_16521
chr10	61838754	61839061	Hand2_rep1_23943,Hand2_rep2_14864
chr10	61865964	61866020	Hand2_rep1_17580,Hand2_rep2_14178
chr10	61909577	61909642	Hand2_rep1_1826,Hand2_rep2_2083
chr10	61919963	61920189	Hand2_rep1_7076,Hand2_rep2_7546
chr10	61920476	61920574	Hand2_rep1_7671,Hand2_rep2_5540
chr10	61921058	61921259	Hand2_rep1_3425,Hand2_rep2_7535
chr10	62232201	62232390	Hand2_rep2_5036,Hand2_rep1_2540
chr10	62306498	62306676	Hand2_rep2_3753,Hand2_rep1_6038
chr10	62308968	62309036	Hand2_rep1_2135,Hand2_rep2_2879
chr10	62340149	62340269	Hand2_rep2_17298,Hand2_rep1_16075
chr10	62843844	62843971	Hand2_rep1_7050,Hand2_rep2_9591
chr10	62866703	62866836	Hand2_rep2_2032,Hand2_rep1_2228
chr10	63456438	63456686	Hand2_rep2_15353,Hand2_rep1_12564
chr10	63457274	63457430	Hand2_rep1_14618,Hand2_rep2_14870
chr10	65309135	65309242	Hand2_rep1_16524,Hand2_rep2_10085
chr10	65700895	65700962	Hand2_rep2_11967,Hand2_rep1_21741
chr10	66177451	66177538	Hand2_rep2_11134,Hand2_rep1_22547
chr10	66393953	66394033	Hand2_rep2_1946,Hand2_rep1_1440
chr10	66770475	66770672	Hand2_rep2_13353,Hand2_rep1_21739
chr10	66781040	66781189	Hand2_rep1_3457,Hand2_rep2_3964
chr10	66910264	66910311	Hand2_rep2_14871,Hand2_rep1_11185
chr10	66910569	66910683	Hand2_rep2_7922,Hand2_rep1_4444
chr10	66920327	66920526	Hand2_rep1_8112,Hand2_rep2_5537
chr10	66921521	66921592	Hand2_rep1_1590,Hand2_rep2_1055
chr10	66935725	66935793	Hand2_rep2_8171,Hand2_rep1_8306
chr10	66973356	66973634	Hand2_rep2_8574,Hand2_rep1_6275
chr10	66994626	66994736	Hand2_rep1_19802,Hand2_rep2_12271
chr10	67002734	67002845	Hand2_rep1_13040,Hand2_rep2_7641
chr10	67003334	67003455	Hand2_rep1_22311,Hand2_rep2_19001
chr10	67104363	67104525	Hand2_rep2_1199,Hand2_rep1_1239
chr10	67182643	67182783	Hand2_rep2_9941,Hand2_rep1_18077
chr10	67199005	67199229	Hand2_rep1_4068,Hand2_rep2_2360
chr10	67208870	67208982	Hand2_rep2_19627,Hand2_rep1_10972
chr10	67209931	67210042	Hand2_rep2_4316,Hand2_rep1_5165
chr10	67305052	67305199	Hand2_rep2_8170,Hand2_rep1_10705
chr10	67979389	67979601	Hand2_rep2_16601,Hand2_rep1_9147
chr10	68193185	68193235	Hand2_rep2_1671,Hand2_rep1_1652
chr10	68208446	68208524	Hand2_rep2_7687,Hand2_rep1_9149
chr10	68465838	68465968	Hand2_rep2_389,Hand2_rep1_1275
chr10	68583658	68583823	Hand2_rep2_18996,Hand2_rep1_21838
chr10	68783704	68783821	Hand2_rep1_19617,Hand2_rep2_8580
chr10	68856183	68856331	Hand2_rep2_9500,Hand2_rep1_12117
chr10	68857396	68857540	Hand2_rep1_10421,Hand2_rep2_6314
chr10	68980062	68980143	Hand2_rep1_14466,Hand2_rep2_11929
chr10	69253385	69253473	Hand2_rep1_111,Hand2_rep2_127
chr10	69263249	69263339	Hand2_rep2_7116,Hand2_rep1_8201
chr10	69535616	69535814	Hand2_rep1_3978,Hand2_rep2_5311
chr10	69574240	69574441	Hand2_rep1_8172,Hand2_rep2_11930
chr10	69579682	69579798	Hand2_rep2_18902,Hand2_rep1_22973
chr10	69584341	69584425	Hand2_rep2_2970,Hand2_rep1_1820
chr10	69619715	69619813	Hand2_rep2_11347,Hand2_rep1_8891
chr10	69628718	69628838	Hand2_rep2_2685,Hand2_rep1_7045
chr10	69787177	69787233	Hand2_rep2_8635,Hand2_rep1_5643
chr10	69787773	69788105	Hand2_rep2_5579,Hand2_rep1_8168
chr10	69796917	69797070	Hand2_rep2_5655,Hand2_rep1_6258
chr10	69798252	69798499	Hand2_rep2_9214,Hand2_rep1_16529
chr10	69901661	69901919	Hand2_rep1_14592,Hand2_rep2_6248
chr10	69925737	69925798	Hand2_rep2_3096,Hand2_rep1_4272
chr10	70011767	70012007	Hand2_rep2_9935,Hand2_rep1_5465
chr10	70095927	70096017	Hand2_rep2_7217,Hand2_rep1_5266
chr10	70149524	70149674	Hand2_rep1_5366,Hand2_rep2_7188
chr10	70292018	70292225	Hand2_rep2_16070,Hand2_rep1_12472
chr10	70428186	70428267	Hand2_rep2_8177,Hand2_rep1_4191
chr10	70689952	70690055	Hand2_rep1_17887,Hand2_rep2_11431
chr10	70817239	70817373	Hand2_rep1_17835,Hand2_rep2_16379
chr10	70821023	70821153	Hand2_rep1_21233,Hand2_rep2_14828
chr10	70861335	70861444	Hand2_rep1_10170,Hand2_rep2_11145
chr10	70967124	70967212	Hand2_rep2_3854,Hand2_rep1_7843
chr10	71060294	71060406	Hand2_rep2_6493,Hand2_rep1_2728
chr10	71086616	71086790	Hand2_rep1_8601,Hand2_rep2_4184
chr10	71146388	71146431	Hand2_rep2_6591,Hand2_rep1_4831
chr10	71207803	71207970	Hand2_rep2_9212,Hand2_rep1_14432
chr10	73085498	73085747	Hand2_rep1_15189,Hand2_rep2_17901
chr10	73828771	73829020	Hand2_rep2_9496,Hand2_rep1_4832
chr10	74005797	74005874	Hand2_rep1_7195,Hand2_rep2_9824
chr10	74257580	74257754	Hand2_rep1_3686,Hand2_rep2_6423
chr10	74680253	74680394	Hand2_rep1_656,Hand2_rep2_293
chr10	75054837	75054897	Hand2_rep1_2153,Hand2_rep2_2563
chr10	75449064	75449150	Hand2_rep1_7515,Hand2_rep2_11315
chr10	75547897	75548213	Hand2_rep2_7183,Hand2_rep1_3822
chr10	75589164	75589340	Hand2_rep1_9115,Hand2_rep2_9492
chr10	75892971	75893063	Hand2_rep1_4731,Hand2_rep2_6778
chr10	75915593	75915728	Hand2_rep2_6320,Hand2_rep1_11195
chr10	76650663	76650848	Hand2_rep1_12145,Hand2_rep2_8550
chr10	76682641	76682736	Hand2_rep1_8867,Hand2_rep2_5993
chr10	76732840	76732977	Hand2_rep2_5990,Hand2_rep1_4986
chr10	76733411	76733520	Hand2_rep1_7207,Hand2_rep2_6000
chr10	76902742	76902860	Hand2_rep2_4653,Hand2_rep1_9898
chr10	76903711	76903928	Hand2_rep2_4514,Hand2_rep1_6293
chr10	76906130	76906201	Hand2_rep1_2430,Hand2_rep2_2276
chr10	76973969	76974188	Hand2_rep2_16060,Hand2_rep1_11196
chr10	77036338	77036480	Hand2_rep2_9491,Hand2_rep1_4070
chr10	77683557	77683832	Hand2_rep2_17886,Hand2_rep1_18061
chr10	77684132	77684400	Hand2_rep2_13939,Hand2_rep1_9460
chr10	77895636	77895896	Hand2_rep2_10313,Hand2_rep1_5693
chr10	77912702	77912848	Hand2_rep2_9972,Hand2_rep1_6085
chr10	78304985	78305186	Hand2_rep1_14651,Hand2_rep2_15759
chr10	78396186	78396314	Hand2_rep2_18243,Hand2_rep1_18678
chr10	79654972	79655132	Hand2_rep2_13033,Hand2_rep1_18095
chr10	79712514	79712659	Hand2_rep2_17938,Hand2_rep1_9450
chr10	79932839	79932918	Hand2_rep1_4067,Hand2_rep2_13439
chr10	80165050	80165116	Hand2_rep1_261,Hand2_rep2_525
chr10	80261322	80261342	Hand2_rep2_5825,Hand2_rep1_6624
chr10	80742270	80742497	Hand2_rep1_10735,Hand2_rep2_19358
chr10	80774459	80774701	Hand2_rep2_6673,Hand2_rep1_6897
chr10	80826199	80826439	Hand2_rep1_11636,Hand2_rep2_15844
chr10	80835623	80835745	Hand2_rep1_10737,Hand2_rep2_7729
chr10	80936268	80936480	Hand2_rep1_8180,Hand2_rep2_12326
chr10	81568395	81568649	Hand2_rep2_18093,Hand2_rep1_16942
chr10	81596687	81596855	Hand2_rep2_5328,Hand2_rep1_9439
chr10	81639558	81639689	Hand2_rep1_7201,Hand2_rep2_8555
chr10	82666575	82666787	Hand2_rep1_13601,Hand2_rep2_5630
chr10	82690656	82690816	Hand2_rep1_3281,Hand2_rep2_6172
chr10	82792438	82792793	Hand2_rep2_16094,Hand2_rep1_17561
chr10	82796587	82796734	Hand2_rep1_5980,Hand2_rep2_2938
chr10	82860137	82860215	Hand2_rep1_16533,Hand2_rep2_13228
chr10	83081031	83081266	Hand2_rep1_15371,Hand2_rep2_15934
chr10	83094305	83094353	Hand2_rep2_3576,Hand2_rep1_4259
chr10	83109028	83109191	Hand2_rep2_13826,Hand2_rep1_9504
chr10	83160111	83160311	Hand2_rep2_17293,Hand2_rep1_12284
chr10	83162206	83162300	Hand2_rep2_304,Hand2_rep1_330
chr10	83344541	83344654	Hand2_rep1_8574,Hand2_rep2_3521
chr10	83391177	83391423	Hand2_rep2_13225,Hand2_rep1_17893
chr10	83711675	83712003	Hand2_rep2_4068,Hand2_rep1_4810
chr10	83836487	83836786	Hand2_rep2_12500,Hand2_rep1_11366
chr10	83882940	83883030	Hand2_rep1_6204,Hand2_rep2_9976
chr10	83895855	83895932	Hand2_rep2_2307,Hand2_rep1_2094
chr10	83897626	83897933	Hand2_rep2_7283,Hand2_rep1_11367
chr10	83942223	83942334	Hand2_rep2_2474,Hand2_rep1_1864
chr10	83970462	83970604	Hand2_rep2_18085,Hand2_rep1_13013
chr10	84202002	84202105	Hand2_rep2_7743,Hand2_rep1_13320
chr10	84438184	84438352	Hand2_rep2_13048,Hand2_rep1_19213
chr10	84440501	84440628	Hand2_rep1_1408,Hand2_rep2_3078
chr10	84544500	84544573	Hand2_rep1_20546,Hand2_rep2_13961
chr10	84592872	84592925	Hand2_rep1_2601,Hand2_rep2_3550
chr10	84733751	84734011	Hand2_rep2_3235,Hand2_rep1_5691
chr10	84793377	84793492	Hand2_rep2_8238,Hand2_rep1_9777
chr10	84967870	84967952	Hand2_rep2_6819,Hand2_rep1_10193
chr10	85141485	85141595	Hand2_rep1_1462,Hand2_rep2_1966
chr10	85401108	85401197	Hand2_rep1_544,Hand2_rep2_588
chr10	85464388	85464699	Hand2_rep2_6427,Hand2_rep1_7517
chr10	85474060	85474123	Hand2_rep1_2607,Hand2_rep2_1319
chr10	86381261	86381333	Hand2_rep1_78,Hand2_rep2_20
chr10	86425677	86425767	Hand2_rep1_6593,Hand2_rep2_3758
chr10	86818663	86818857	Hand2_rep2_12303,Hand2_rep1_12238
chr10	87751024	87751142	Hand2_rep2_4142,Hand2_rep1_6948
chr10	87812414	87812556	Hand2_rep1_1473,Hand2_rep2_2082
chr10	87858473	87858556	Hand2_rep2_9317,Hand2_rep1_14473
chr10	87859098	87859181	Hand2_rep1_4330,Hand2_rep2_2190
chr10	87860599	87860870	Hand2_rep1_9525,Hand2_rep2_15414
chr10	87868649	87868861	Hand2_rep1_2984,Hand2_rep2_2398
chr10	87896665	87896931	Hand2_rep1_17913,Hand2_rep2_13401
chr10	88046126	88046183	Hand2_rep2_181,Hand2_rep1_317
chr10	88235525	88235583	Hand2_rep1_3370,Hand2_rep2_2692
chr10	88260584	88260658	Hand2_rep1_8746,Hand2_rep2_4260
chr10	88336875	88336960	Hand2_rep2_15380,Hand2_rep1_6993
chr10	90640920	90641009	Hand2_rep1_9124,Hand2_rep2_13936
chr10	90903557	90903834	Hand2_rep2_4773,Hand2_rep1_6483
chr10	90904762	90904907	Hand2_rep1_16970,Hand2_rep2_6820
chr10	91208503	91208689	Hand2_rep2_10939,Hand2_rep1_24115
chr10	91214807	91214886	Hand2_rep1_5779,Hand2_rep2_4592
chr10	91222451	91222513	Hand2_rep1_3395,Hand2_rep2_1938
chr10	91227028	91227258	Hand2_rep1_15867,Hand2_rep2_6719
chr10	91229452	91229545	Hand2_rep2_4409,Hand2_rep1_4452
chr10	91241714	91241927	Hand2_rep2_3349,Hand2_rep1_3617
chr10	91271353	91271414	Hand2_rep2_12863,Hand2_rep1_6378
chr10	91278596	91279040	Hand2_rep1_13021,Hand2_rep2_11328
chr10	91573307	91573534	Hand2_rep2_18423,Hand2_rep1_15297
chr10	91591708	91591933	Hand2_rep1_10188,Hand2_rep2_14217
chr10	92298706	92298860	Hand2_rep1_3974,Hand2_rep2_4355
chr10	92874669	92874780	Hand2_rep2_10753,Hand2_rep1_5254
chr10	92943311	92943441	Hand2_rep2_8061,Hand2_rep1_9100
chr10	93270133	93270310	Hand2_rep2_14221,Hand2_rep1_12428
chr10	93497310	93497452	Hand2_rep2_12815,Hand2_rep1_8384
chr10	93636012	93636269	Hand2_rep1_4251,Hand2_rep2_4460
chr10	93818786	93818844	Hand2_rep2_5087,Hand2_rep1_4768
chr10	94065993	94066137	Hand2_rep1_5502,Hand2_rep2_4444
chr10	94072771	94072970	Hand2_rep1_10500,Hand2_rep2_7699
chr10	94111422	94111516	Hand2_rep2_58,Hand2_rep1_43
chr10	94408831	94408937	Hand2_rep2_8763,Hand2_rep1_8789
chr10	94416577	94416851	Hand2_rep2_4591,Hand2_rep1_9135
chr10	94457575	94457819	Hand2_rep2_5979,Hand2_rep1_10410
chr10	94566075	94566245	Hand2_rep1_5501,Hand2_rep2_2483
chr10	94589078	94589200	Hand2_rep1_5969,Hand2_rep2_9514
chr10	94770845	94771051	Hand2_rep1_19946,Hand2_rep2_12828
chr10	94867464	94867509	Hand2_rep2_4629,Hand2_rep1_3792
chr10	95040334	95040762	Hand2_rep1_10780,Hand2_rep2_3249
chr10	95044249	95044413	Hand2_rep2_14840,Hand2_rep1_15363
chr10	95083580	95083947	Hand2_rep2_9715,Hand2_rep1_4989
chr10	95169345	95169585	Hand2_rep1_8703,Hand2_rep2_4767
chr10	95182853	95182946	Hand2_rep2_5205,Hand2_rep1_6627
chr10	95184307	95184413	Hand2_rep2_3414,Hand2_rep1_2618
chr10	95202272	95202404	Hand2_rep1_22991,Hand2_rep2_15143
chr10	95222000	95222104	Hand2_rep2_11204,Hand2_rep1_16348
chr10	95225107	95225241	Hand2_rep2_8223,Hand2_rep1_6597
chr10	95227603	95227700	Hand2_rep2_6041,Hand2_rep1_6067
chr10	95234014	95234200	Hand2_rep2_6209,Hand2_rep1_6764
chr10	95248900	95249243	Hand2_rep2_6571,Hand2_rep1_4884
chr10	95367353	95367503	Hand2_rep1_15092,Hand2_rep2_15477
chr10	95399797	95400165	Hand2_rep2_12310,Hand2_rep1_5197
chr10	95544117	95544195	Hand2_rep1_6639,Hand2_rep2_6072
chr10	95631996	95632286	Hand2_rep1_12066,Hand2_rep2_11735
chr10	95708053	95708385	Hand2_rep1_22753,Hand2_rep2_14252
chr10	95725391	95725487	Hand2_rep2_2062,Hand2_rep1_2692
chr10	95730103	95730162	Hand2_rep1_3908,Hand2_rep2_4858
chr10	95918714	95919075	Hand2_rep1_10748,Hand2_rep2_16262
chr10	95923585	95923776	Hand2_rep1_15090,Hand2_rep2_12129
chr10	96305515	96305938	Hand2_rep2_13758,Hand2_rep1_19122
chr10	96394821	96394925	Hand2_rep1_7855,Hand2_rep2_5242
chr10	96467452	96467581	Hand2_rep1_4999,Hand2_rep2_4024
chr10	96469145	96469238	Hand2_rep1_5630,Hand2_rep2_4422
chr10	96481207	96481280	Hand2_rep2_14876,Hand2_rep1_17562
chr10	96580035	96580465	Hand2_rep2_10163,Hand2_rep1_14422
chr10	96687132	96687253	Hand2_rep1_16968,Hand2_rep2_15035
chr10	96930049	96930161	Hand2_rep1_13378,Hand2_rep2_19546
chr10	96955581	96955738	Hand2_rep1_20594,Hand2_rep2_19711
chr10	97266066	97266194	Hand2_rep2_3548,Hand2_rep1_7066
chr10	97397269	97397341	Hand2_rep2_3255,Hand2_rep1_2511
chr10	97399647	97399795	Hand2_rep1_9093,Hand2_rep2_6466
chr10	97423629	97423888	Hand2_rep2_17345,Hand2_rep1_11370
chr10	97476291	97476468	Hand2_rep1_15963,Hand2_rep2_16334
chr10	97492496	97492680	Hand2_rep2_2472,Hand2_rep1_4066
chr10	97537022	97537117	Hand2_rep2_646,Hand2_rep1_964
chr10	97538190	97538396	Hand2_rep1_11176,Hand2_rep2_7798
chr10	97650445	97650479	Hand2_rep1_3287,Hand2_rep2_4987
chr10	97905861	97906011	Hand2_rep1_2830,Hand2_rep2_3457
chr10	98231864	98232014	Hand2_rep2_1999,Hand2_rep1_3070
chr10	98259299	98259653	Hand2_rep1_19115,Hand2_rep2_11405
chr10	98418407	98418601	Hand2_rep1_7805,Hand2_rep2_16815
chr10	98543962	98544080	Hand2_rep2_5325,Hand2_rep1_5811
chr10	98996433	98996582	Hand2_rep2_7520,Hand2_rep1_13383
chr10	99093911	99094168	Hand2_rep2_15675,Hand2_rep1_19932
chr10	99118814	99118953	Hand2_rep2_5839,Hand2_rep1_6086
chr10	99130698	99130887	Hand2_rep2_15498,Hand2_rep1_11175
chr10	99202627	99202777	Hand2_rep2_8321,Hand2_rep1_5108
chr10	99239594	99239637	Hand2_rep1_565,Hand2_rep2_197
chr10	99268959	99269074	Hand2_rep1_3753,Hand2_rep2_2233
chr10	99285444	99285594	Hand2_rep1_7084,Hand2_rep2_6287
chr10	99302143	99302283	Hand2_rep2_1285,Hand2_rep1_1181
chr10	99359635	99359938	Hand2_rep1_5082,Hand2_rep2_3687
chr10	99362620	99362677	Hand2_rep1_201,Hand2_rep2_373
chr10	99416469	99416587	Hand2_rep1_8123,Hand2_rep2_6280
chr10	99553218	99553310	Hand2_rep1_9299,Hand2_rep2_12140
chr10	99592277	99592410	Hand2_rep2_14563,Hand2_rep1_19930
chr10	99832687	99832749	Hand2_rep1_17442,Hand2_rep2_14265
chr10	100072670	100072822	Hand2_rep2_5668,Hand2_rep1_4293
chr10	100425386	100425501	Hand2_rep1_12435,Hand2_rep2_15358
chr10	102506952	102507232	Hand2_rep1_18197,Hand2_rep2_17088
chr10	102618826	102618969	Hand2_rep2_15062,Hand2_rep1_6759
chr10	102777342	102777464	Hand2_rep2_10340,Hand2_rep1_9342
chr10	102889864	102890070	Hand2_rep2_5553,Hand2_rep1_3251
chr10	102947361	102947514	Hand2_rep1_4135,Hand2_rep2_8025
chr10	103001045	103001205	Hand2_rep1_12644,Hand2_rep2_17576
chr10	103958200	103958510	Hand2_rep2_5364,Hand2_rep1_5390
chr10	104019668	104019725	Hand2_rep2_6254,Hand2_rep1_10572
chr10	104815116	104815290	Hand2_rep2_19801,Hand2_rep1_8337
chr10	105029252	105029455	Hand2_rep1_3497,Hand2_rep2_8592
chr10	105427633	105427811	Hand2_rep1_16542,Hand2_rep2_10153
chr10	105434564	105434745	Hand2_rep1_17447,Hand2_rep2_13365
chr10	105501848	105501915	Hand2_rep2_10003,Hand2_rep1_11222
chr10	105532937	105533136	Hand2_rep1_12941,Hand2_rep2_19242
chr10	105701563	105701637	Hand2_rep1_14744,Hand2_rep2_13654
chr10	106877266	106877480	Hand2_rep1_20192,Hand2_rep2_18168
chr10	106885212	106885325	Hand2_rep1_11338,Hand2_rep2_5159
chr10	106905820	106905923	Hand2_rep1_15916,Hand2_rep2_10458
chr10	107352194	107352327	Hand2_rep1_8533,Hand2_rep2_7523
chr10	107871097	107871168	Hand2_rep2_2016,Hand2_rep1_1045
chr10	107901599	107901636	Hand2_rep1_2616,Hand2_rep2_3652
chr10	107902148	107902251	Hand2_rep2_2372,Hand2_rep1_2988
chr10	107946567	107946686	Hand2_rep2_863,Hand2_rep1_1577
chr10	108146699	108146755	Hand2_rep1_8121,Hand2_rep2_7356
chr10	108173278	108173383	Hand2_rep2_10359,Hand2_rep1_12927
chr10	108385265	108385648	Hand2_rep1_16965,Hand2_rep2_17424
chr10	108436347	108436483	Hand2_rep1_13368,Hand2_rep2_7291
chr10	109326295	109326372	Hand2_rep1_9360,Hand2_rep2_8640
chr10	109906643	109906680	Hand2_rep1_4824,Hand2_rep2_3875
chr10	110044518	110044636	Hand2_rep2_1061,Hand2_rep1_1777
chr10	110102234	110102443	Hand2_rep2_13634,Hand2_rep1_6244
chr10	110156038	110156138	Hand2_rep1_16539,Hand2_rep2_15950
chr10	110653776	110653946	Hand2_rep2_10643,Hand2_rep1_18692
chr10	110806446	110806635	Hand2_rep1_17940,Hand2_rep2_12119
chr10	110835433	110835737	Hand2_rep2_9062,Hand2_rep1_6603
chr10	110919075	110919119	Hand2_rep1_648,Hand2_rep2_557
chr10	111010878	111010916	Hand2_rep2_4477,Hand2_rep1_3132
chr10	111100109	111100198	Hand2_rep2_19235,Hand2_rep1_20695
chr10	111111080	111111204	Hand2_rep2_4989,Hand2_rep1_7014
chr10	111143146	111143209	Hand2_rep2_948,Hand2_rep1_742
chr10	111165925	111166308	Hand2_rep2_13992,Hand2_rep1_14728
chr10	111219656	111219777	Hand2_rep1_13660,Hand2_rep2_13993
chr10	111444353	111444501	Hand2_rep2_8986,Hand2_rep1_6248
chr10	111654280	111654400	Hand2_rep2_8765,Hand2_rep1_4033
chr10	111699780	111700017	Hand2_rep2_5720,Hand2_rep1_3566
chr10	111750975	111751062	Hand2_rep2_1435,Hand2_rep1_2793
chr10	111814892	111815025	Hand2_rep1_5364,Hand2_rep2_4195
chr10	111815238	111815426	Hand2_rep2_3975,Hand2_rep1_4565
chr10	111906613	111906744	Hand2_rep2_7954,Hand2_rep1_11214
chr10	111921623	111921822	Hand2_rep1_18174,Hand2_rep2_9806
chr10	111955897	111956183	Hand2_rep2_13310,Hand2_rep1_21721
chr10	114737670	114737853	Hand2_rep2_16679,Hand2_rep1_16962
chr10	115249222	115249431	Hand2_rep1_5687,Hand2_rep2_10732
chr10	115457712	115457865	Hand2_rep2_16258,Hand2_rep1_10140
chr10	115491038	115491117	Hand2_rep1_7635,Hand2_rep2_8576
chr10	115618638	115618725	Hand2_rep2_11132,Hand2_rep1_11212
chr10	115708653	115708987	Hand2_rep2_7521,Hand2_rep1_2957
chr10	115775858	115776018	Hand2_rep2_4213,Hand2_rep1_3868
chr10	115776566	115776739	Hand2_rep1_6595,Hand2_rep2_2213
chr10	115872466	115872595	Hand2_rep2_1156,Hand2_rep1_1147
chr10	115896348	115896575	Hand2_rep2_7239,Hand2_rep1_15054
chr10	115968751	115968922	Hand2_rep2_3554,Hand2_rep1_5195
chr10	115979748	115979808	Hand2_rep2_6219,Hand2_rep1_15518
chr10	116056683	116056796	Hand2_rep1_17928,Hand2_rep2_15963
chr10	116100803	116100946	Hand2_rep1_19474,Hand2_rep2_16279
chr10	116132203	116132265	Hand2_rep2_1730,Hand2_rep1_1317
chr10	116162404	116162550	Hand2_rep1_17418,Hand2_rep2_9327
chr10	116164081	116164402	Hand2_rep2_12977,Hand2_rep1_11210
chr10	116338742	116338788	Hand2_rep1_4833,Hand2_rep2_18247
chr10	116677977	116678119	Hand2_rep2_5182,Hand2_rep1_9339
chr10	116756057	116756473	Hand2_rep1_8343,Hand2_rep2_3590
chr10	116834720	116834827	Hand2_rep2_14031,Hand2_rep1_15543
chr10	116894607	116894688	Hand2_rep2_2779,Hand2_rep1_4414
chr10	116965410	116965458	Hand2_rep1_3881,Hand2_rep2_5131
chr10	117376881	117377024	Hand2_rep2_12264,Hand2_rep1_11993
chr10	117462135	117462416	Hand2_rep1_7812,Hand2_rep2_17422
chr10	117583816	117583878	Hand2_rep2_242,Hand2_rep1_610
chr10	117799167	117799363	Hand2_rep2_12156,Hand2_rep1_7915
chr10	117845187	117845268	Hand2_rep2_10941,Hand2_rep1_5926
chr10	117846447	117846532	Hand2_rep2_5686,Hand2_rep1_4992
chr10	117905688	117905916	Hand2_rep2_2663,Hand2_rep1_2395
chr10	118121920	118122067	Hand2_rep1_8009,Hand2_rep2_6686
chr10	118726421	118726533	Hand2_rep2_553,Hand2_rep1_1596
chr10	119076308	119076473	Hand2_rep2_5878,Hand2_rep1_3842
chr10	119097087	119097218	Hand2_rep1_5828,Hand2_rep2_16977
chr10	119099087	119099146	Hand2_rep2_1674,Hand2_rep1_1487
chr10	119132023	119132119	Hand2_rep2_19257,Hand2_rep1_10390
chr10	119161965	119162021	Hand2_rep2_10902,Hand2_rep1_10555
chr10	119441573	119441826	Hand2_rep2_14791,Hand2_rep1_9793
chr10	120245786	120245917	Hand2_rep2_7260,Hand2_rep1_11994
chr10	120251390	120251477	Hand2_rep1_17,Hand2_rep2_14
chr10	120257364	120257611	Hand2_rep2_18807,Hand2_rep1_23245
chr10	120327350	120327465	Hand2_rep2_4475,Hand2_rep1_3607
chr10	120328385	120328578	Hand2_rep2_18565,Hand2_rep1_16632
chr10	120376733	120376849	Hand2_rep1_5353,Hand2_rep2_5525
chr10	120392807	120392899	Hand2_rep1_22535,Hand2_rep2_18487
chr10	120571229	120571294	Hand2_rep2_10949,Hand2_rep1_8625
chr10	120580368	120580421	Hand2_rep2_9432,Hand2_rep1_8348
chr10	120582596	120582749	Hand2_rep1_4478,Hand2_rep2_6167
chr10	120638406	120638523	Hand2_rep2_6796,Hand2_rep1_5838
chr10	120639494	120639610	Hand2_rep1_12890,Hand2_rep2_16305
chr10	120647091	120647288	Hand2_rep1_2965,Hand2_rep2_3288
chr10	120648110	120648606	Hand2_rep2_2494,Hand2_rep1_1145
chr10	120648874	120649036	Hand2_rep2_7375,Hand2_rep1_8191
chr10	120697731	120697867	Hand2_rep2_11278,Hand2_rep1_6978
chr10	120707782	120707936	Hand2_rep2_10947,Hand2_rep1_6692
chr10	120717178	120717314	Hand2_rep2_1141,Hand2_rep1_1221
chr10	120719956	120720291	Hand2_rep1_20684,Hand2_rep2_15961
chr10	120735837	120736061	Hand2_rep1_16961,Hand2_rep2_10777
chr10	120764263	120764446	Hand2_rep1_9621,Hand2_rep2_6935
chr10	120777101	120777192	Hand2_rep1_11199,Hand2_rep2_5127
chr10	120787424	120787517	Hand2_rep2_12470,Hand2_rep1_7103
chr10	120801366	120801517	Hand2_rep1_9311,Hand2_rep2_7311
chr10	120821900	120821978	Hand2_rep2_1183,Hand2_rep1_1185
chr10	120855196	120855300	Hand2_rep1_10399,Hand2_rep2_11705
chr10	120872488	120872605	Hand2_rep2_678,Hand2_rep1_529
chr10	120986488	120986562	Hand2_rep1_2649,Hand2_rep2_3775
chr10	121016774	121016951	Hand2_rep1_10493,Hand2_rep2_17537
chr10	121023793	121023924	Hand2_rep1_20696,Hand2_rep2_18028
chr10	121030262	121030334	Hand2_rep2_530,Hand2_rep1_771
chr10	121040952	121041214	Hand2_rep2_4482,Hand2_rep1_5951
chr10	121099697	121099915	Hand2_rep1_10403,Hand2_rep2_11240
chr10	121129624	121129746	Hand2_rep1_17857,Hand2_rep2_15239
chr10	121386330	121386484	Hand2_rep1_13600,Hand2_rep2_19338
chr10	121404263	121404474	Hand2_rep1_2113,Hand2_rep2_9691
chr10	121436655	121436945	Hand2_rep2_16716,Hand2_rep1_15763
chr10	121467757	121467927	Hand2_rep2_8398,Hand2_rep1_11998
chr10	121475971	121476439	Hand2_rep2_18569,Hand2_rep2_17848,Hand2_rep1_12225
chr10	121505873	121505913	Hand2_rep2_6645,Hand2_rep1_6217
chr10	121510279	121510342	Hand2_rep1_13198,Hand2_rep2_13990
chr10	121626426	121626548	Hand2_rep2_19642,Hand2_rep1_23763
chr10	121668977	121669159	Hand2_rep1_8915,Hand2_rep2_11391
chr10	121873310	121873464	Hand2_rep1_6910,Hand2_rep2_10779
chr10	122534903	122534968	Hand2_rep1_1280,Hand2_rep2_1143
chr10	122564244	122564424	Hand2_rep2_2723,Hand2_rep1_4270
chr10	122575445	122575546	Hand2_rep2_1207,Hand2_rep1_1207
chr10	122756238	122756294	Hand2_rep1_5013,Hand2_rep2_5413
chr10	122794404	122794641	Hand2_rep2_10658,Hand2_rep1_10015
chr10	122847975	122848085	Hand2_rep2_3219,Hand2_rep1_6221
chr10	122884640	122884701	Hand2_rep1_3179,Hand2_rep2_6105
chr10	122887219	122887393	Hand2_rep1_882,Hand2_rep2_378
chr10	122902931	122903116	Hand2_rep2_7926,Hand2_rep1_3838
chr10	122913092	122913428	Hand2_rep1_13208,Hand2_rep2_7539
chr10	123251992	123252206	Hand2_rep2_8806,Hand2_rep1_9757
chr10	123345227	123345391	Hand2_rep2_10466,Hand2_rep1_12715
chr10	123572673	123572720	Hand2_rep1_11577,Hand2_rep2_13400
chr10	124183900	124183992	Hand2_rep2_223,Hand2_rep1_398
chr10	124349471	124349552	Hand2_rep2_904,Hand2_rep1_376
chr10	125204328	125204539	Hand2_rep1_11134,Hand2_rep2_9428
chr10	125328471	125328863	Hand2_rep1_20616,Hand2_rep2_15367
chr10	125429967	125430041	Hand2_rep1_3920,Hand2_rep2_6893
chr10	125682083	125682291	Hand2_rep2_15948,Hand2_rep1_22577
chr10	125687892	125688176	Hand2_rep2_15947,Hand2_rep1_13164
chr10	125706233	125706491	Hand2_rep1_22121,Hand2_rep2_17471
chr10	125725875	125725976	Hand2_rep2_6617,Hand2_rep1_7500
chr10	125768329	125768613	Hand2_rep1_23440,Hand2_rep2_15946
chr10	125773590	125773763	Hand2_rep1_6517,Hand2_rep2_5408
chr10	125880018	125880211	Hand2_rep2_8165,Hand2_rep1_18232
chr10	125888894	125889109	Hand2_rep1_12404,Hand2_rep2_13694
chr10	125947993	125948034	Hand2_rep1_4655,Hand2_rep2_7262
chr10	125970607	125970685	Hand2_rep2_1981,Hand2_rep1_1346
chr10	126144802	126145005	Hand2_rep2_15578,Hand2_rep1_13943
chr10	126168940	126169117	Hand2_rep1_19278,Hand2_rep2_7428
chr10	126792947	126793065	Hand2_rep2_8080,Hand2_rep1_12445
chr10	126798588	126798775	Hand2_rep1_13552,Hand2_rep2_15391
chr10	126810553	126810655	Hand2_rep2_8907,Hand2_rep1_8686
chr10	126851234	126851713	Hand2_rep1_6515,Hand2_rep2_14919
chr10	126984508	126984603	Hand2_rep2_4285,Hand2_rep1_4834
chr10	126988882	126988997	Hand2_rep2_10591,Hand2_rep1_10835
chr10	127077660	127077757	Hand2_rep2_12063,Hand2_rep1_10437
chr10	127167697	127167779	Hand2_rep1_8908,Hand2_rep2_15098
chr10	127196400	127196499	Hand2_rep2_6612,Hand2_rep1_5147
chr10	127458042	127458236	Hand2_rep1_12728,Hand2_rep2_8268
chr10	127524297	127524467	Hand2_rep2_12067,Hand2_rep1_20629
chr10	127600233	127600279	Hand2_rep1_2144,Hand2_rep2_3958
chr10	127609469	127609679	Hand2_rep1_7239,Hand2_rep2_7304
chr10	127616069	127616284	Hand2_rep1_7362,Hand2_rep2_5415
chr10	127721950	127722212	Hand2_rep2_15662,Hand2_rep1_5681
chr10	127970685	127970868	Hand2_rep1_16920,Hand2_rep2_11777
chr10	128501551	128501630	Hand2_rep1_406,Hand2_rep2_409
chr10	128519728	128519786	Hand2_rep2_8510,Hand2_rep1_7276
chr10	128719881	128720004	Hand2_rep2_10906,Hand2_rep1_7286
chr10	128779559	128779862	Hand2_rep1_6148,Hand2_rep2_10953
chr10	130368286	130368484	Hand2_rep1_8691,Hand2_rep2_9551
chr11	3123631	3123849	Hand2_rep2_10579,Hand2_rep1_9015
chr11	3335607	3335761	Hand2_rep1_18660,Hand2_rep2_11481
chr11	3371412	3371491	Hand2_rep2_9424,Hand2_rep1_11132
chr11	3374302	3374899	Hand2_rep1_9927,Hand2_rep1_12594,Hand2_rep2_7415
chr11	3612960	3613063	Hand2_rep2_12492,Hand2_rep1_12538
chr11	4572646	4572754	Hand2_rep2_16695,Hand2_rep1_12254
chr11	4573148	4573352	Hand2_rep1_21318,Hand2_rep2_20126
chr11	4629813	4630223	Hand2_rep2_12711,Hand2_rep1_4022
chr11	4793134	4793296	Hand2_rep2_18519,Hand2_rep1_13369
chr11	4855483	4855632	Hand2_rep2_15669,Hand2_rep1_14981
[truncated: 14,107 more rows]
