# Supplementary material for: Gli3 utilizes Hand2 to synergistically regulate tissue-specific transcriptional networks
Source: eLife. 2020 Oct 2;9:e56450. doi: 10.7554/eLife.56450 (PMC7556880; doi:10.7554/eLife.56450)
Supplement: Supplementary file 6. [file elife-56450-supp6.xlsx]

## Sheet: 3a_b
3a												3b
		muscle system proces(	A-P patterning	Muscle contraction	Regionalization	Cell-cell signaling						G-protein coupled receptor signaling	Cell-cell adhesion	Cell-cell signaling	Cell morphogenesis involved in differentiation	Ion transport
		Acta2	Meox2	Acta2	Meox2	Map1b						Abca1	Tenm2	Acvr2b	Tenm2	Abca1
		Adra2a	Eomes	Adra2a	Eomes	Asic2						Adcy1	Lrrc7	Colq	Adcy1	Abca2
		Agtr2	Amhr2	Lmod2	Bhlhe40	Adcyap1						Adcy2	Sparcl1	Tenm2	Pla2g10	Kcnh7
		Aif1	Uncx	Tcap	Tcap	Ccr2						Adcy3	Pcdh10	Adcy1	Sema6a	Kcnh8
		Pi16	Bhlhe40	Atp1a2	Ascl1	Adm						Adcy5	Ank3	Adcy5	Prex1	Pkd1l2
		Lmod2	Tcap	Mybpc1	Nrp1	Adra2a						Adcy9	Apoa4	Adra1b	Islr2	Xkr4
		Tcap	Ascl1	Mybpc3	Neurod1	Agtr2						Adra1b	Pcdhb16	Lrfn2	Ank3	Adcyap1r1
		Mlip	Nkx3-2	Myh3	C3	C1qtnf3						Agtr2	Astn1	Agtr1b	Shtn1	Slc24a4
		Atp1a2	Nrp1	Myh4	Nkx6-1	Mme						Aplp1	Adam19	Agtr2	Klf7	Agtr2
		Mybpc1	Bmp5	Myh6	Foxh1	Mmp9						Atp2b4	Tnfsf14	C1qtnf3	Unc5c	Pla2g10
		Mybpc3	Neurod1	Myh7	Nodal	Amph						Adgrb3	Tnfrsf14	Alk	Irs2	Lrrc7
		Myh3	C3	Myh8	Tbx18	Ppfia2						Galr2	Bcl6	Tshz3	Atoh1	Unc79
		Myh4	Nkx6-1	Myl4	Pax1	Lrrc4c						Cacna1d	Vnn1	Ank3	Atp7a	Oc90
		Myh6	Foxh1	Galr2	Pax7	Atp1a2						Calcr	Btn1a1	Ppfia4	Axl	Dpp10
		Myh7	Nodal	Bdkrb2	Dnaaf1	Musk						Casr	Cldn20	Rnf213	Adgrb3	Ank3
		Myh8	Tbx18	Nos1	Pcdh8	Myh6						Adgre5	Tnfsf18	Tnrc6c	Dst	Ppfia4
		Myl4	Daw1	Nppa	Lhx2	Tnfsf10						Chrm1	Cldn1	Pcdhb16	Cacna1f	Slc26a9
		Myoc	Pax1	Trpa1	Pou5f1	Myoc						Chrm2	Cd2	Klf7	Camk2a	Apoa4
		Myod1	Pax7	Oxtr	Gata5	Myt1						Chrm4	Cd6	Irs2	Camk2b	Ncoa1
		Galr2	Dnaaf1	P2rx6	Nkx2-5	Adgrb1						Drd1	Cd27	Grhl3	Brsk2	Irs2
		Bdkrb2	Pcdh8	Pde4b	Tifab	Tnfrsf11a						Adgrg2	Cdh7	Gpr119	Map3k13	Atp12a
		Nos1	Lhx2	Chga	Ptch1	Fgf18						Ramp1	Cdh12	Avpr1a	Nrxn1	Atp1a4
		Nppa	Pou5f1	Chrm2	Heyl	Nrp1						Ramp3	Cdh17	Axl	Ngef	Atp2a1
		Trpa1	Gata5	Chrne	Robo2	Bmp3						Gcg	Dlg5	Rgs9	Vax2	Atp2b3
		Camk2b	Nkx2-5	Chrng	Emx2	Neurod1						Gcgr	Cdsn	Scel	Col6a1	Atp2b4
		Oxtr	Tifab	Myl7	Foxf1	Foxl2						Ghrh	Cel	Fgf16	Col6a2	Atp4b
		P2ry1	Ptch1	Ccdc78	Foxd1	Ngf						Adgre4	Cdhr3	Sphk1	Col6a3	Abcc3
		P2rx6	Heyl	Pkp2	Foxc2	C3						Gnao1	Adipoq	C3	Col12a1	Atp6v1b1
		Pde4b	Robo2	Pln	Tbr1	Cacna1i						Gnas	Nrxn1	Cacna1h	Crygb	Atp7a
		Chga	Emx2	Nkx2-5	Gata4	Nkx6-1						Grm4	Piezo1	Cacna1g	Aatk	Avpr1a
		Chrm2	Erbb4	Tifab	Gli1	Nodal						Grm6	Cd55	Baiap3	Plxna4	Rgs9
		Chrne	Nanog	Ptafr	Gli2	Nos1						Npb	Pla2g2d	Dagla	Dnm3	Galr2
		Chrng	Foxf1	Ptgs2	Gli3	Nos2						Gpr176	Dlg2	Cacna1b	Dcx	Cacna1h
		Myl7	Foxd1	Des	Hes7	Npy						Hrh2	Dsc1	Cacna1c	Gab2	Cacna1g
		Myoz1	Foxc2	Ankrd2	Cfc1	Nppa						Htr6	Dsc2	Cacna1d	Nkx2-9	Car5a
		Ccdc78	Tbr1	Drd1	Grem2	Trpa1						Htr7	Dsc3	Cacna1e	Plppr4	Cacna1b
		Pkp2	Gata4	Drd2	Hhip	Camk2b						Iapp	Dscam	Chrna6	Shank1	Atp8b3
		Pln	Drc1	Ace2	Hey1	Ntrk1						Lhcgr	Dsg2	Calb1	Dscam	Cacna1c
		Gata5	Gli1	Scn4a	Nkx2-1	Ntrk3						Mc1r	Dsp	Calb2	Lats2	Cacna1d
		Nkx2-5	Gli2	Scn4b	Ttn	Ntsr1						Mc4r	Celsr2	Tnfsf18	Celsr2	Cacna1e
		Tifab	Gli3	Scn5a	Hoxa1	Cckar						Mc5r	Egr3	Camk2a	Ep300	Cacna1f
		Ptafr	Hes7	Scn10a	Hoxa2	Oprk1						Cxcl9	Epha3	Camk2b	Epha3	Cacna1s
		Ptgs2	Cfc1	Fgf13	Hoxa3	Tbx18						Mtnr1a	Fat1	Syt6	Epha4	Chrna6
		Des	Tbx5	Slc8a3	Hoxb2	Oxtr						Nos1	Fcgr2b	Brsk2	Esrrb	Calcr
		Ankrd2	Grem2	Scn3b	Hoxb3	P2rx5						Npr3	Gpnmb	Casr	Lamc3	Camk2a
		Drd1	Hhip	Gata4	Hoxb4	P2ry1						Oprd1	Foxf1	Shisa7	Sptbn5	Camk2b
		Drd2	Hey1	Sstr2	Hoxb9	P2rx6						P2ry1	Colec10	P2rx6	Fat1	Syt6
		Ace2	Nkx2-1	Tacr1	Hoxc5	Cplx3						Pde4b	Il23a	Adgre5	Flnb	Casr
		Scn4a	Dnaic2	Tacr3	Hoxd3	Cd33						Prkca	Card11	Slc24a1	Fn1	Shisa7
		Scn4b	Lrrc6	Gnao1	Hoxd13	Slc24a1						Ptgdr	Nfat5	Cel	Olfm4	Slc5a11
		Scn5a	Ttn	Lmod3	Wnt2	Pcdh8						Ptger2	Megf10	Gpr50	Postn	Rgn
		Scn10a	Hoxa1	Tnni1	Pax8	Pcsk1						Ptger3	Igsf5	Cacna2d2	Atp8a2	Cd19
		Fgf13	Hoxa2	Ttn	Tdrd5	Gpr50						Cxcl11	Mmp24	Chrm1	Disc1	P2rx6
		Slc8a3	Hoxa3	Jsrp1	Lhx3	Pde6b						Gpha2	Srpx2	Chrm2	Col25a1	Entpd1
		Scn3b	Hoxb2	Rnf207	Dll1	Chga						Sstr2	Gnas	Chrm4	Gfra2	Slc28a1
		Gata4	Hoxb3	Kcna1	Lhx1	Chrm1						Sstr5	Adtrp	Chrnd	Cnmd	Slc24a1
		Gata6	Hoxb4	Kcnd3	Lrp2	Chrm2						Adgrl3	Il1rapl1	Adipoq	Grin1	Cacna2d2
		Sstr2	Hoxb9	Kcnj8		Chrne						Tshr	Rnase10	Ly6g6d	Il1rapl1	Asic3
		Tacr1	Hoxc5			Chrng						Rxfp2	H2-DMb2	Nrxn1	Lingo1	Kcnb2
		Tacr3	Hoxd3			Adipoq						P2ry12	H2-Aa	Slc24a2	Rnase10	Chrm1
		Gnao1	Hoxd13			Ly6g6d						Adgrg6	Vsig4	Vax2	Nrg1	Chrnd
		Lmod3	Wnt2			Otof							Negr1	Bmp8a	Tlx2	Slc22a8
		Tnni1	Acvr1c			Pkp2							Igf2	Col1a1	Hrh2	Clcn5
		Ttn	Zic1			Ccr5							Il1b	Stxbp5l	Hspg2	Nrxn1
		Jsrp1	Rnf207			Plcb2							Il2ra	Myrip	Kndc1	Slc24a2
		Il1b	Pax8			Plcl1							Il7r	Rfx6	Tubb2b	Slc22a14
		Rnf207	Tdrd5			Bmp8a							Il12a	Gabbr2	Itga4	Abcc2
		Il15	Lhx3			Cnr2							Itga4	Adgra2	Itpka	Cnga3
		Kcna1	Dll1			Pmp22							Itga7	Rims4	L1cam	Cnga4
		Kcnd3	Lhx1			Stxbp5l							Itgad	Rab11fip5	Lamb3	Akap6
		Kcnj8	Lrp2			Gdf15							Itgal	Nkx2-5	Lhx1	Cpt1b
						Myrip							Itpkb	Snph	Gdf7	Smim6
						Rfx6							Kifc3	Dgkb	Lrp1	Clca2
						Pou5f1							L1cam	Kcng2	Mag	Nkx2-5
						Gata5							Lama3	Fgf20	Map1b	Ano7
						Crhr1							Lgals7	Dio2	Mcf2	Nos1ap
						Gna14							Mag	Dlg2	Meltf	Piezo1
						Srgn							Ubash3a	Med12	Clic5	Dapk1
						Slitrk5							Rgcc	Shank1	Ncam1	Rtbdn
						Nkx2-5							Btla	Slc12a6	Nefm	Kcnk4
						Prkcg							Ctnna3	Drd1	Cntn5	Kcng2
						Ptgs2							Cd274	Hcn4	Ngf	Slc13a4
						Panx3							Pkd1l1	Dvl3	Nkx6-1	Pla2g2d
						Lypd1							Ncam1	Gpc6	Nodal	Fgf20
						Snap91							Cntn5	Gal	Notch1	Dlg2
						Ptprn2							Ninj2	Lats2	Cntn4	Slc4a9
						Ptpro							Nodal	Akap9	Ntrk1	Shank1
						Sv2b							Cntn4	Celsr2	Ntrk2	Slc12a6
						Dio2							Olr1	Egr3	Omg	Kcne2
						Rab3b							Pak3	Epha4	Pak3	Drd1
						Sost							Pkd1	Sez6	Sema5b	Hcn4
						Drd1							Pkhd1	Kcnmb2	Plxnb3	Dspp
						Drd2							Pkp1	Esr2	Pmp22	Abcc9
						Rasgrf1							Serpinf2	Apc2	Pou4f1	Nupr1
						Rasgrf2							Plxnb3	Fat1	Vstm2l	Gal
						Rbp4							Sdk2	Fgf1	Prkca	Akap9
						Gal							Vstm2l	Fgf5	Prkcq	Stom
						Egr1							Prkca	Gpnmb	Ptprz1	Kcnmb2
						Egr3							Prkcq	Unc13b	Rap1gap	Ramp1
						Robo2							Prkg1	Sorbs1	Robo2	Ramp3
						Erbb4							Dchs2	Prickle2	Peak1	Slc41a2
						Esr1							Ptger3	Kcnmb3	Epha10	Gjd3
						Etv2							Izumo1	Dkk3	Lrrk2	Unc13b
						Nrn1							Fat4	Dkk2	Sema6d	Ncoa2
						S100b							Rap1gap	Gabra1	Draxin	Kcnv1
						Wnt16							Kif26b	Gabrb2	Fmn1	Kcnmb3
						Scn4a							Robo2	Gabrg3	Arx	Gabra1
						Scn4b							S100a8	Gabrp	Shank2	Kcnh5
						Scn5a							S100a9	Gabrr1	Tnn	Gabrb2
						Scn9a							Selplg	Gad2	Slit1	Gabrg3
						Scn10a							Slamf1	Jph4	Slit3	Gabrp
						Sct							Tenm3	Ago2	Hecw1	Gabrr1
						Trpv6							Igsf9b	Ghrl	Mycbp2	Jph4
						Fgf13							Zfp609	Syt17	Sipa1l3	Syt17
						Gpc5							Spn	Disc1	Sarm1	Atp8a2
						Fgg							Cdh23	Cplx1	Fstl4	Cplx1
						Ccl24							Nfasc	Gcg	Cdh23	Gcg
						Foxd1							Clstn2	Nmu	Nfasc	Slc16a12
						Foxl1							Adamts18	Ghrh	Nbeal2	Kcnk18
						Cxcl13							Adgrl3	Gja8	Arc	Slc9b1
						Slc8a3							Pcdhgb5	Uts2	Cobl	Glrb
						Slc22a2							Pcdhgb1	Rbms3	Cux2	Slc9a7
						Sorcs3							Pcdhga10	Glrb	Arhgef28	Gnao1
						Sv2c							Pcdhb15	Gnao1	Szt2	Gnas
						Cacng5							Pcdhb14	Gnas	Syne1	Gpld1
						Sncb							Pcdhb13	Gpld1	Srcin1	Gpm6a
						Scn3b							Pcdhb11	Ffar2	Adnp	Slc35d2
						Gabra5							Pcdhb10	Pclo	Tgfb2	Gria2
						Sox10							Pcdhb8	Gria2	Thy1	Grik4
						Gabrg3							Pcdhb7	Grik4	Tnr	Grin1
						Gabrr2							Pcdhb6	Grin1	Dok6	Adamts8
						Hecw1							Pcdhb4	Grm4	Trio	Grm6
						Il17c							Pcdhb3	Grm6	Trpc5	Il1rapl1
						Cplx1							Pcdhb2	Il1rapl1	Wnt7a	Slc10a5
						Gata4							Pcdhac2	Gucy1b1	Wnt3a	Slc2a6
						Clstn2							Tgfb2	Gpr176	Pcdh15	Kcng4
						Sst							Thy1	Hcrtr1	Cass4	Scn11a
						Lrrc4							Tnr	Hgf	Lhx3	Tnfaip8l3
						Ffar4							Tnxb	Nrg1		Slc5a7
						Lin7b							P2ry12	Scn11a		Hrh2
						Ghrh							Zap70	Hic1		Gltpd2
						Gipr							Crb2	Slc5a7		Htr6
						Gli1							Zbtb16	Hnf4a		Htr7
						Gli2							Wnt3a	Hrh2		Slc5a9
						Gli3							Pcdh15	Htr6		Cacna2d4
						Tacr1							Nectin4	Htr7		Il1a
						Gnao1							Cd177	Tnc		Il1b
						Tbx5							Dock8	Iapp		Rnf207
						Otoa							Zmiz1	Mylk2		Slc6a17
						Gpr35								Igfbp1		Catsper3
						Gpr39								Igfbp6		Itpr2
						Ffar2								Il1b		Itpr3
						Pcdhb14								Rnf207		Kcna3
						Pcdhb11								Inhba		Kcna4
						Pcdhb9								Tubb2b		Kcna5
						Pcdhb2								Itpka		Kcnb1
						Grid1								Itpr2		Kcnd3
						Shisa2								Itpr3		Kcnh1
						Grik2								Kcna5		Kcnj3
						Grik3								Kcnb1		Kcnj6
						Grin2c								Kcnh1		Kcnj8
						Grm2								Kcnj3		Kcnj10
						Grm6								Kcnj10		Kcnj13
						Grm7								Kcnk3		Kcnk3
						Grp								Kcnma1		Kcnma1
						Thy1								Kcnq2		Kcnn3
						Nkx2-1								Kcnq3		Kcnq2
						Tlr2								Kcns3		Kcnq3
						Tnr								L1cam		Kcns1
						Clcf1								Lect2		Kcns3
						Hrh3								Lhx1		Lrrc38
						Hgf								Lnpep		Lcn2
						Scn11a								Lrp1		Lhcgr
						Trh								Mag		Slc16a14
						Tshr								Map1b		Abcc12
						Tyrobp								Mc4r		Slc6a19
						Shisa6								Mecp2		Mecp2
						Vgf								Ago3		Meltf
						Vsnl1								Cxcl9		Clic5
						Htr4								Kmt2a		Cxcl9
						Tnc								Mme		Mmp9
						Iapp								Mmp9		Slc51a
						Wnt2								Hipk2		Rem1
						Acvr1c								Piwil4		Abcb5
						Rgs8								Cited1		Myo6
						Igfbp6								Mst1r		Myog
						Acp4								Mtnr1a		Pkd1l1
						Il1b								Musk		Fxyd4
						Rnf207								Npas4		Bhlha15
						Il15								Myo6		Ngf
						Lypd6b								Ncam1		Nos1
						Inhba								Ndp		Nipal4
						Kcna1								Bhlha15		Ntrk2
						Kcnc2								Ngf		Tlr9
						Kcnd2								Nkx6-1		Oprd1
						Pax8								Nodal		Slc22a18
						Kcnh1								Nos1		Oxt
						Kcnq3								Notch1		P2ry1
						Kcns3								Cntn4		Nipal1
						Dll1								Nrgn		Pcp4
						Lhx1								Ntrk1		Pde4b
						Syt8								Ntrk2		Pirt
						Lrp2								Oprd1		Enpp1
						Lta								Oxt		Slc30a8
														Nps		Best3
														P2ry1		Ahnak
														Pde6a		Pkd1
														Pde6b		Plcb2
														Pdyn		Hephl1
														Penk		Prkaa2
														Slc30a8		Prkca
														Tmod2		Slc13a5
														Pkd1		Prkg1
														Plcb2		Ptger3
														Pmch		Ptgs2
														Pmp22		Rasgrf1
														Stx19		Steap4
														Prkaa2		Rgs4
														Prkca		Rgs7
														Prkcg		Tmc5
														Psmb8		Tmc3
														Ptger3		Ryr2
														Ptgs2		Scn1a
														Rasgrf1		Scn3a
														Prrt2		Scn5a
														Gsc		Scn9a
														Rgs4		Scn10a
														Tle6		Cxcl11
														Robo2		Sfrp4
														Lrrk2		Chrna9
														Sox8		Slc1a1
														Ryr2		Slc6a2
														S100a8		Slc6a7
														S100a9		Slc6a11
														Draxin		Slc8a1
														Scn1a		Slc9a3
														Scn3a		Piezo2
														Scn5a		Shank2
														Scn9a		Slc12a3
														Scn10a		Slc18a3
														Cxcl11		Slc22a1
														Sfrp4		Slc22a5
														Chrna9		Rims1
														Rab11fip1		Snap25
														Slc1a1		Unc80
														Slc6a2		Scn3b
														Shank2		Hecw1
														Slc18a3		Cdh23
														Tnn		Atp10b
														Wnt10a		Slc52a3
														Sorcs3		Abcc8
														Sv2c		Plcb1
														Igsf9b		Arc
														Rims1		Atp11a
														Snap25		Slc38a8
														Scn3b		Slc26a5
														Sox10		Kcng3
														Hecw1		Kcnh3
														Iqsec2		Tgfb2
														Srd5a2		Thy1
														Ash1l		Abcb9
														Tnrc6b		Abca6
														Nfasc		Gsg1l
														Clstn2		Slc16a8
														Sstr5		Trpc5
														Lin7b		Trpm2
														Abcc8		Ano5
														Plcb1		Kcnh6
														Arc		Kcne4
														Cux2		Fam155a
														Syne1		Glra4
														Phf24		Ucp3
														Pcdhb14		Tmprss3
														Pcdhb13		Utrn
														Pcdhb11		Lrrc18
														Pcdhb10		Vdr
														Pcdhb6		Best1
														Pcdhb4		P2ry12
														Pcdhb3		Scara5
														Pcdhb2		Nkain3
														Tdgf1		Slc30a3
														Adnp		Xkr7
														Thy1		Wnt3a
														Tjp1		Tmem163
														Tle2		Plscr2
														Daam2		Eppin
														Rimbp2		Rhbg
														Tnr		Tmem63c
														Trpm2		Atp10d
														Tshb		Syt8
														Tshr		Neto1
														Glra4
														Kdm6a
														Vipr2
														Wnt7a
														Wnt8a
														Wnt2b
														Acvr1c
														Retn
														Trim9
														Anks1b
														Rspo4
														Grid2ip
														Notum
														Wnt3a
														Syt8
														Neto1

## Sheet: 4a
Figure 4A
Gli3 alone									Gli3-Hand2 overlap
	Hh family protein binding	Smoothened binding	Hh receptor activity	Embryonic organ development	Pattern specification process				regulation of cAMP-mediated signaling	G protein-coupled receptor signaling	Embryonic organ development	Pattern specification process	Regulation of cell population proliferation	Morphogenesis of branching epithelium	Regulation of chondrocyte differentiation	Axon Guidance	Neuron Projection Guidance	Muscle Cell Differentiation
	Ptch1	Ptch1	Ptch1	Ptch1	Ptch1				Pde4b	Pde4b	Il10	Nkx3-2	Il10	Il10	Nkx3-2	Lrtm1	Lrtm1	Smyd1
	Hhip	Ptch2	Ptch2	Hmx2	Hoxa1				Tshr	Tshr	Nkx3-2	Ptch1	Rerg	Ptch1	Fgf18	Ptch1	Ptch1	Hlf
	Ptch2			Hoxa1	Lhx2				Sstr2	Sstr2	Tshr	Nrp1	Eaf2	Nrp1	Gli2	Lhx9	Lhx9	Plagl1
				Fendrr	Gli2				Ghrh	Ghrh	Ptch1	Bmp5	Tshr	Adm	Gli3	Nrp1	Nrp1	Klhl40
				Gli2	Hes7				Adm	Adm	Hesx1	Gli1	Ptch1	Gli2	Maf	Ptpro	Ptpro	Heyl
				Pcdh15	Cfc1				Adra2a	Adra2a	Adm	Gli2	Sstr2	Gli3		Gli2	Gli2	Egr1
				Ntn1	Foxf1				Nos1	Nos1	Bmp5	Gli3	Fgf18	Foxd1		Gli3	Gli3
				Foxf1	Foxd1				Drd1	Cnr2	Gli1	Foxd1	Plac8	Tnc		Foxd1	Foxd1
				Foxf2	Foxc2				Gpr65	Drd1	Gli2	Bhlhe40	Nrp1	Lhx1		Ntrk1	Ntrk1
				Foxc2	Heyl				Grm2	Gpr65	Gli3	Lhx1	Ghrh			Lhx1	Lhx1
				Foxe1	Hhip					Grm2	Wnt16	Heyl	Adm			Robo2	Robo2
				Hey1	Hey1						Foxf2	Dnaic2	Bmp5			Tbr1	Tbr1
				Tshr1	Dnaic2						Lhx1	Robo2	Adra2a
											Rnf207	Tbr1	Adipoq
												Rnf207	Gli1
													Gli2
													Gli3
													Jag1
													Pkhd1
													Nos1
													Col4a3
													Rgs5
													Tnc
													Ntrk1
													Lin28a
													Sgk2
													Lhx1
													Egr1
													Cgref1
													P3h2
													Cd37
													Hck

## Sheet: 6a_c
6a
cGBM							dGBM
	regulation of cAMP-mediated signaling	G protein-coupled receptor signaling	Osteoblast differentiation	Axon Guidance				G protein-coupled receptor signaling	Muscle Cell differentiation	Muscle Tissue Development	Muscle Organ Development
	Ghrh	Ghrh	Smoc1	Lrtm1				Drd1	Smyd1	Smyd1	Smyd1
	Gpr65	Gpr65	Ptch1	Ptch1				Tshr	Klhl40	Klhl40	Klhl40
	Sstr2	Sstr2	Sp7	Foxd1				Sstr2	Hlf	Hlf	Hlf
								Grm2	Heyl	Heyl	Heyl
								Adm	Egr1	Egr1	Egr1
								Adra2a	Plagl1	Mettl21c	Mettl21c
								Nos1		Plagl1	Plagl1
								Cnr2
