# Supplementary figures and images for: Gli3 utilizes Hand2 to synergistically regulate tissue-specific transcriptional networks
Source: eLife journal article supplement (doi:10.7554/elife.56450), 2020-10-02

# Elliott\_Figure 1-figure supplement 1

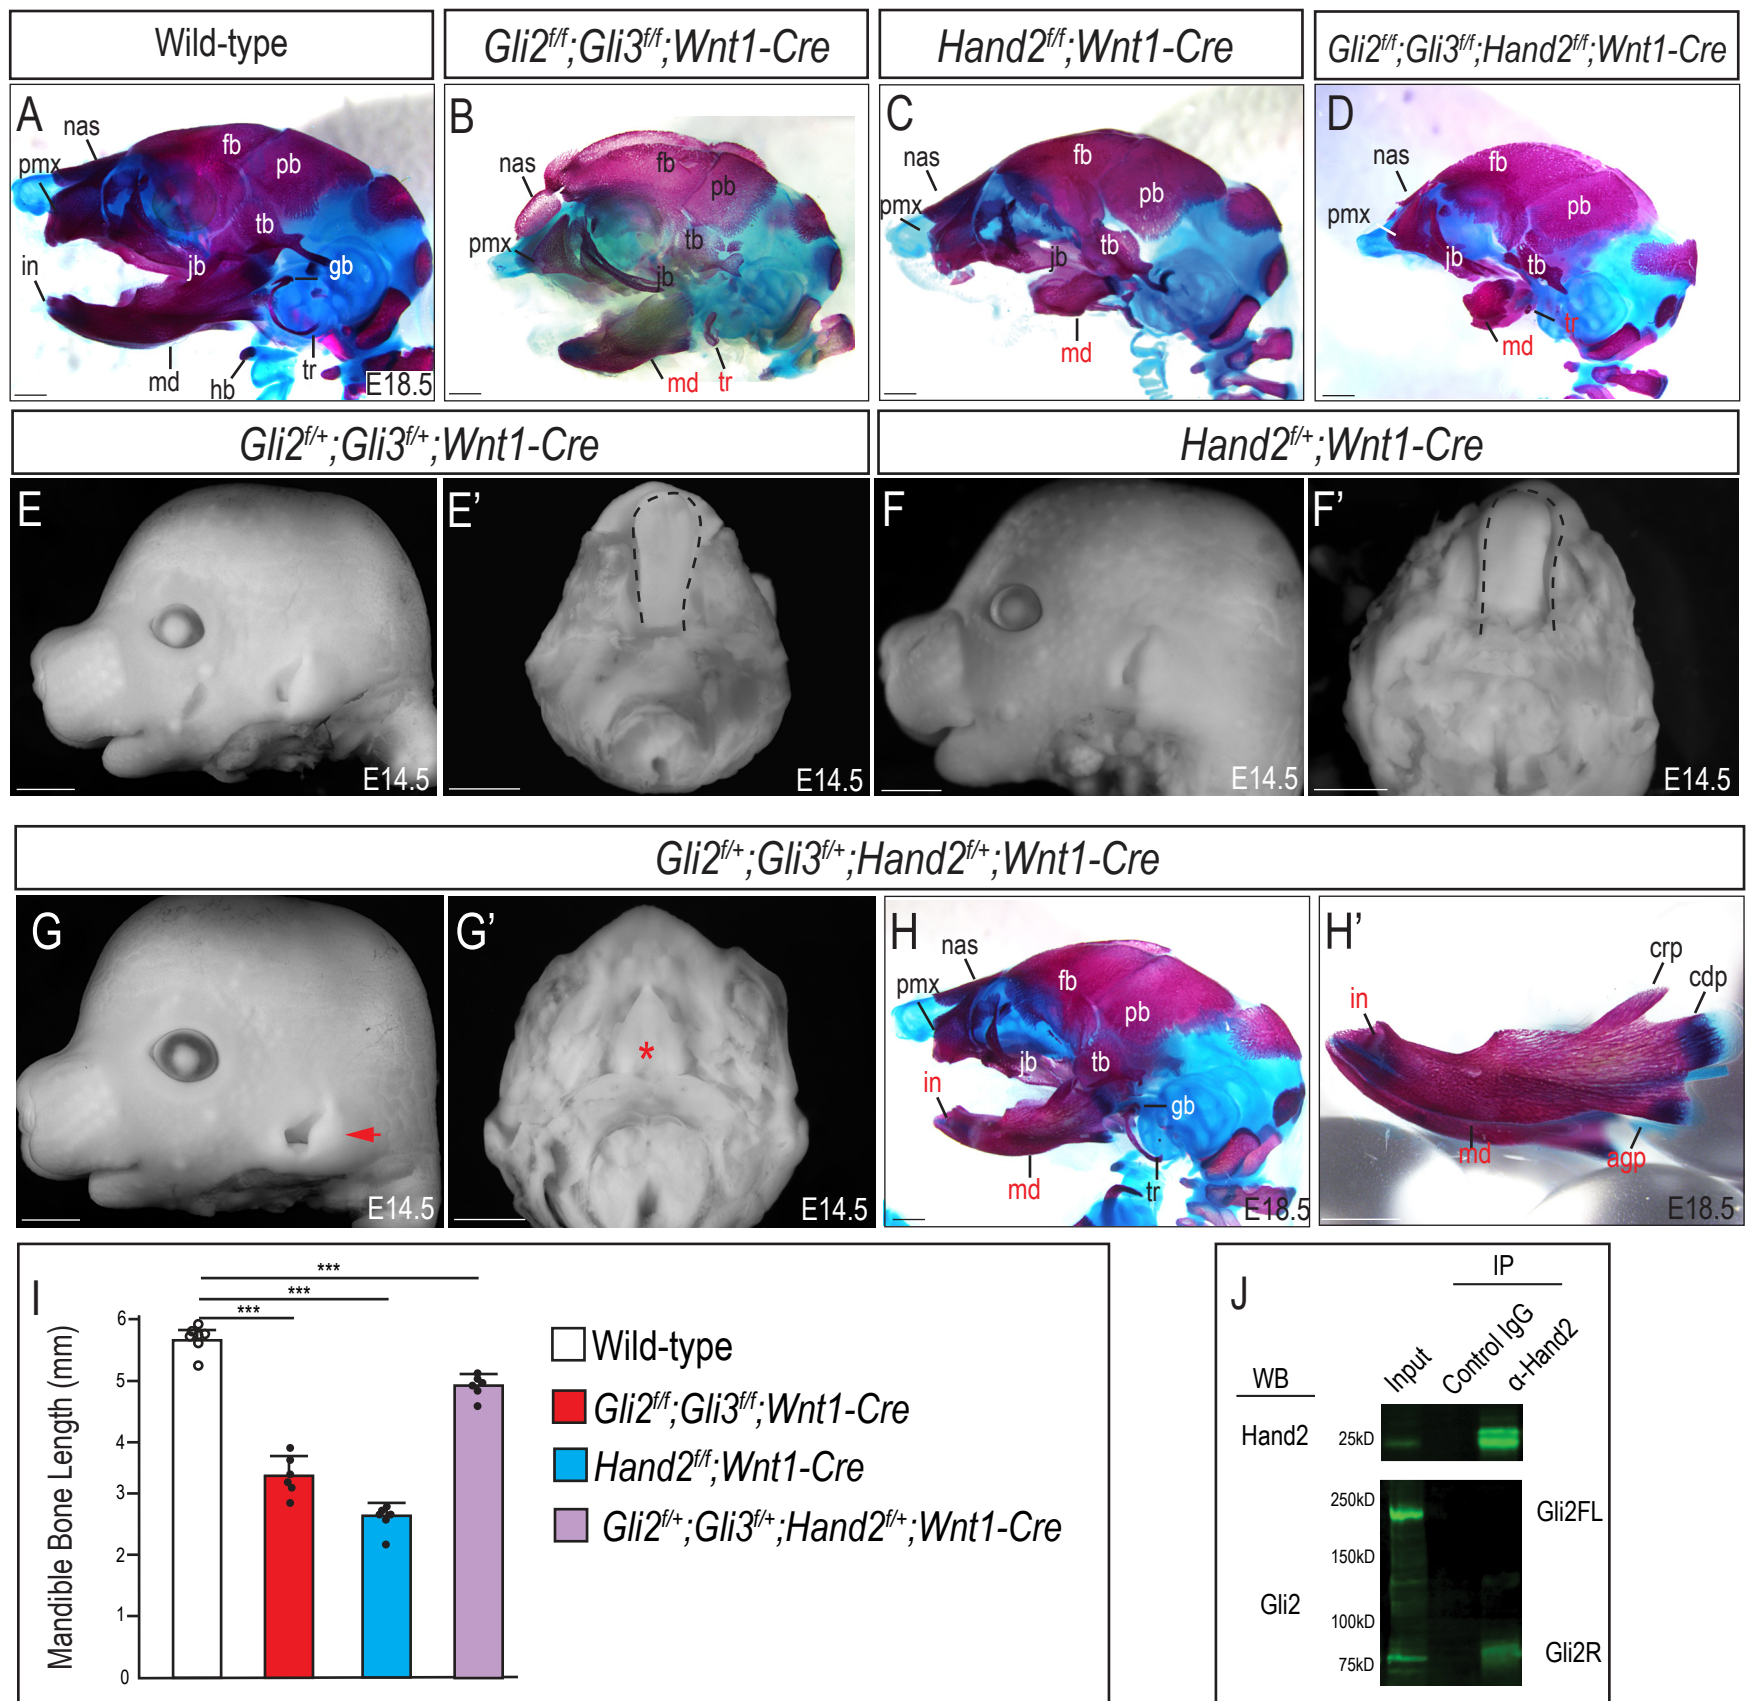

Supplement: supp [file elife-56450-supp-v1.zip]

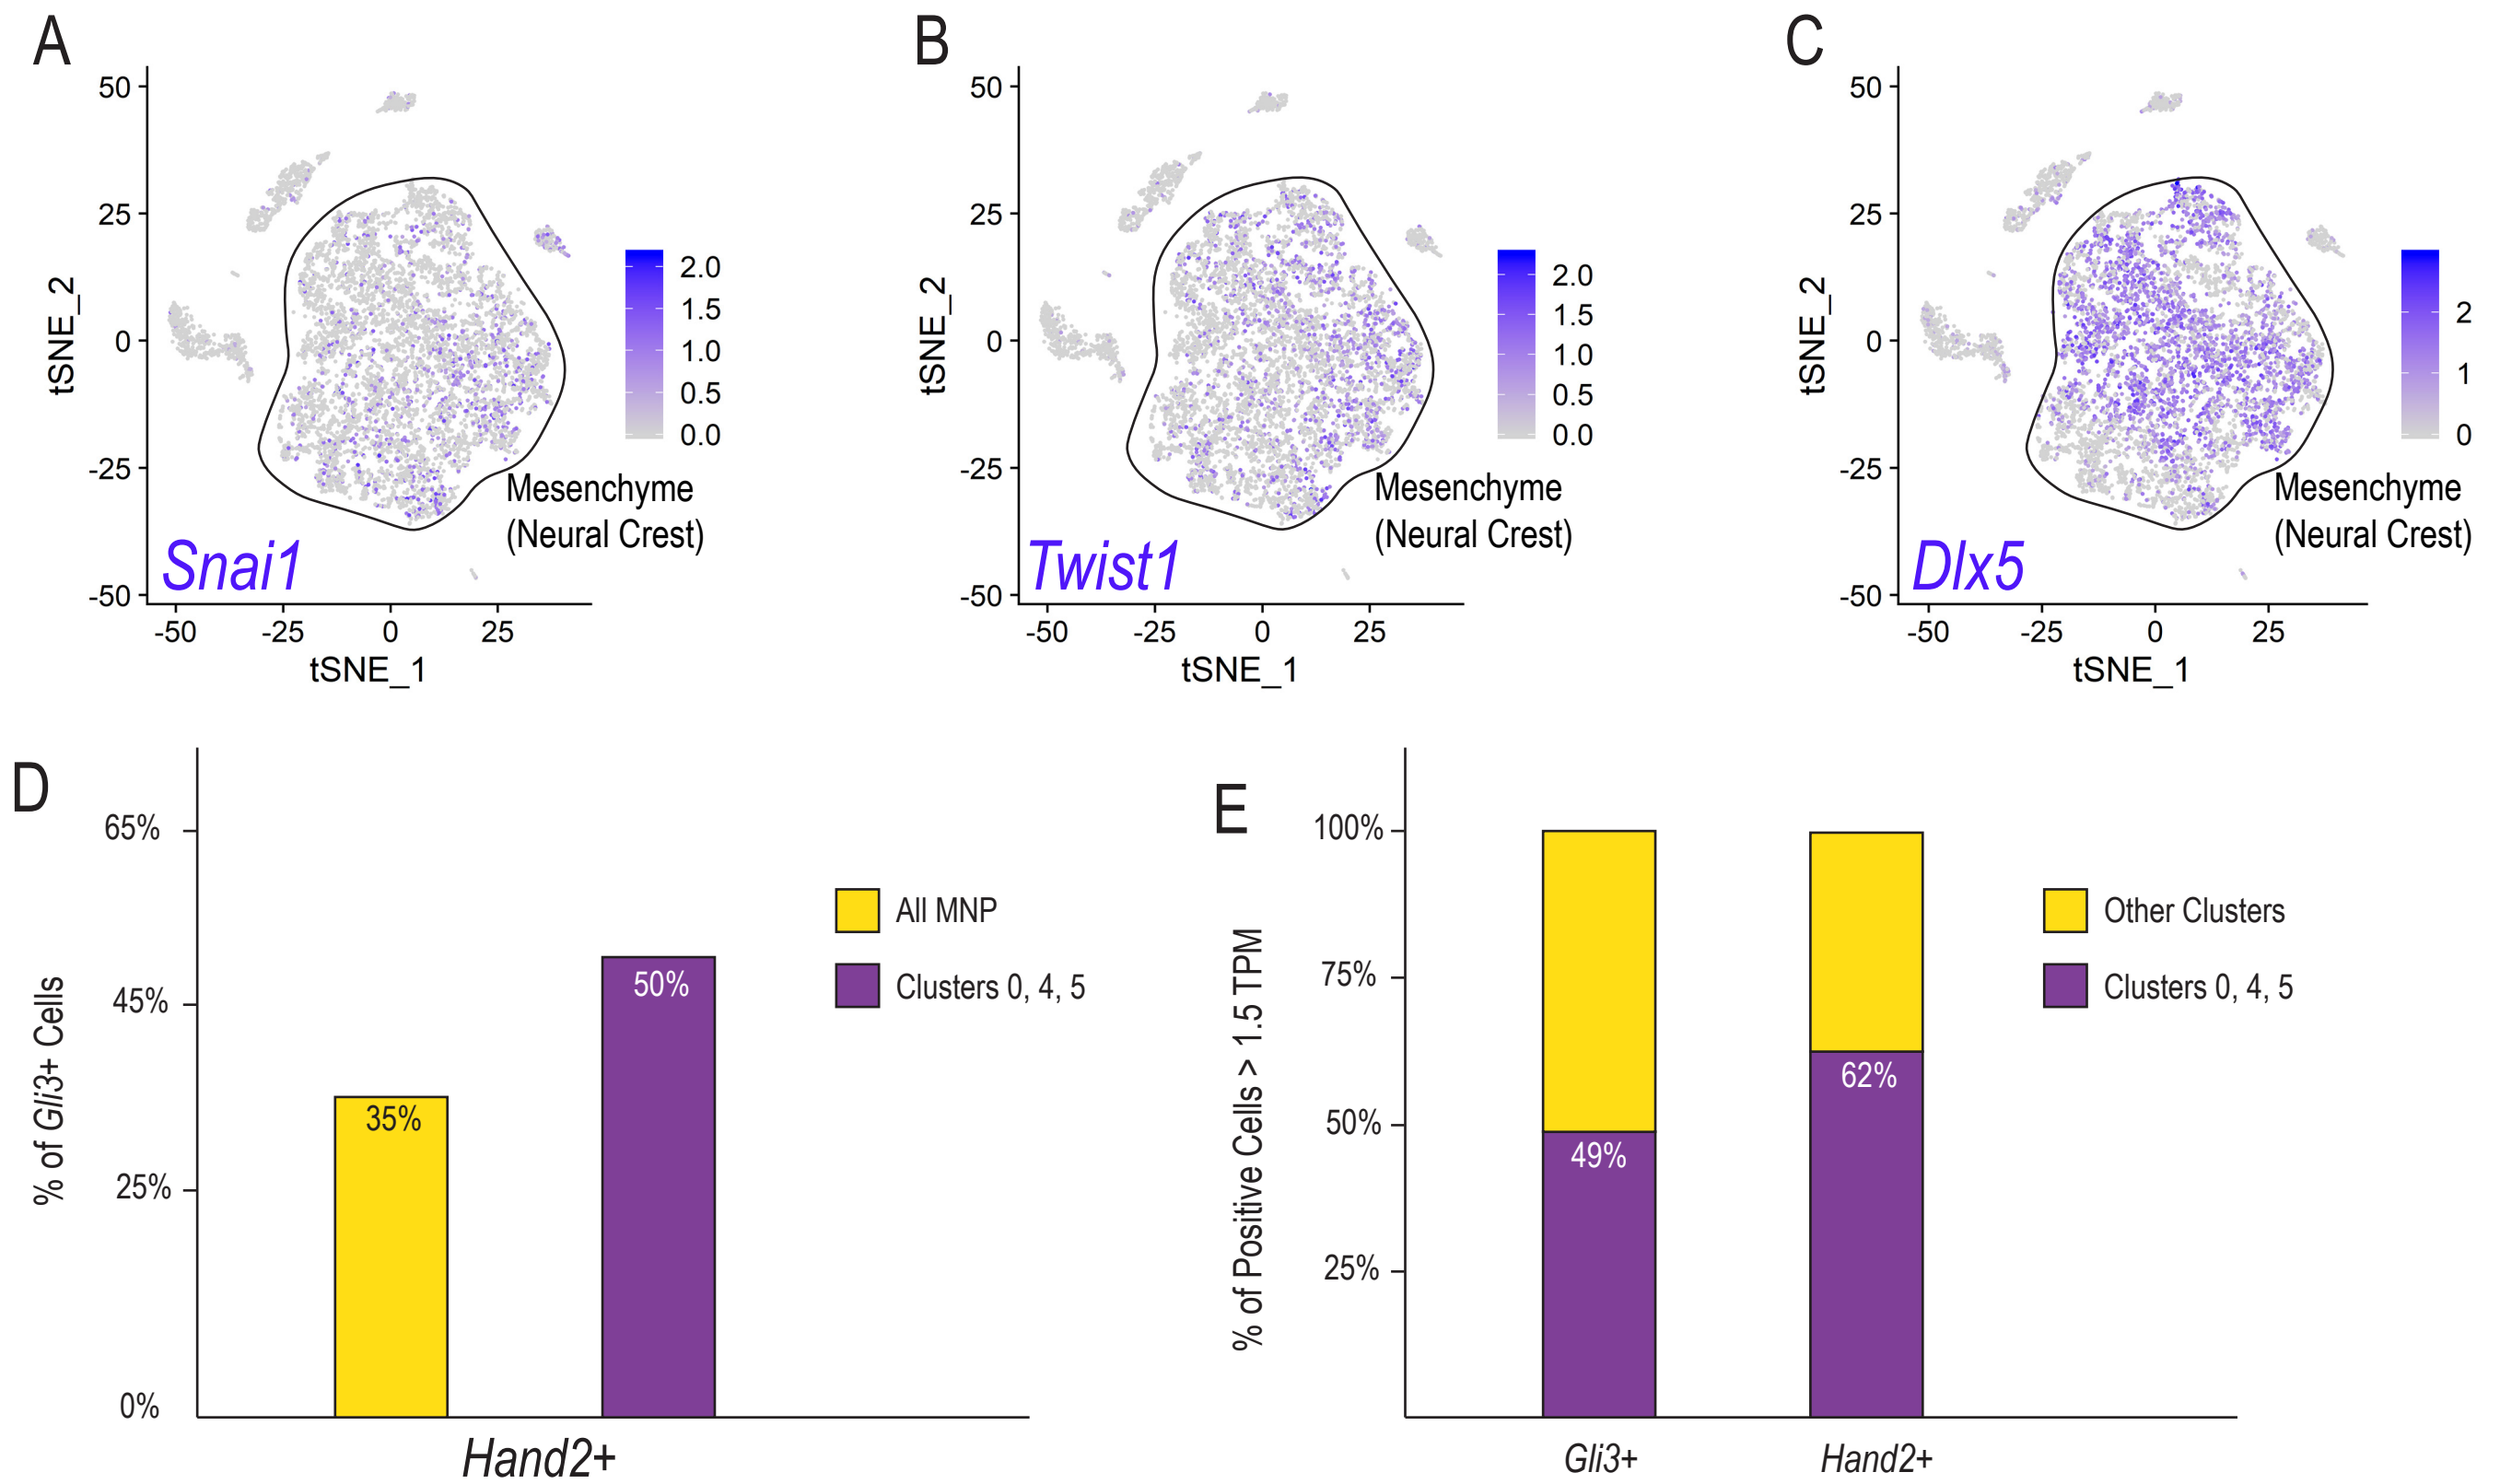

Supplement: supp [file elife-56450-supp-v1.zip]

**A**

| p3XFLAG-Hand2 |  | +                                                                                 | +                                                                                 |        |
|---------------|--|-----------------------------------------------------------------------------------|-----------------------------------------------------------------------------------|--------|
| p3XFLAG-Gli3  |  | +                                                                                 | +                                                                                 |        |
|               |  | 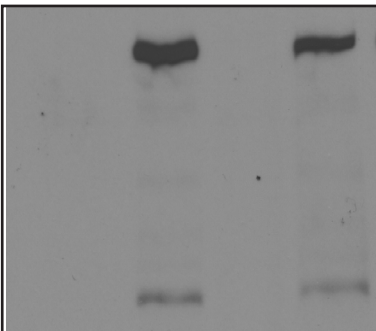 |  | Gli3FL |
|               |  |  |  | Gli3R  |
|               |  |  |  | Hand2  |
|               |  |  |  | GAPDH  |

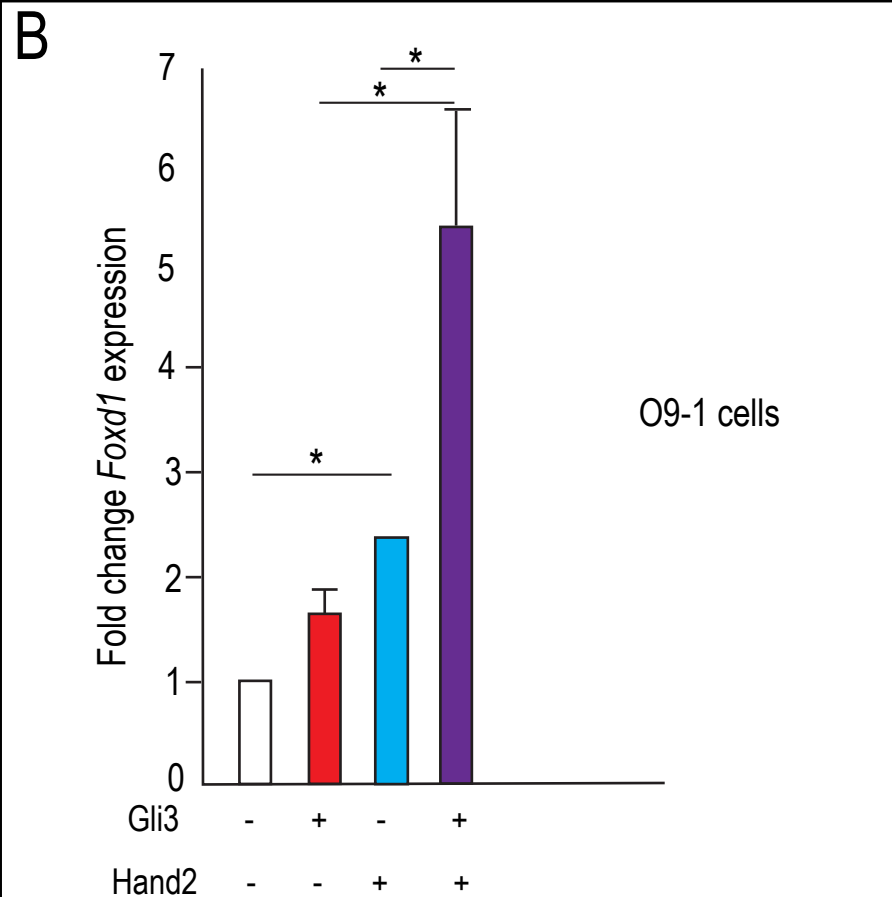

Supplement: supp [file elife-56450-supp-v1.zip]

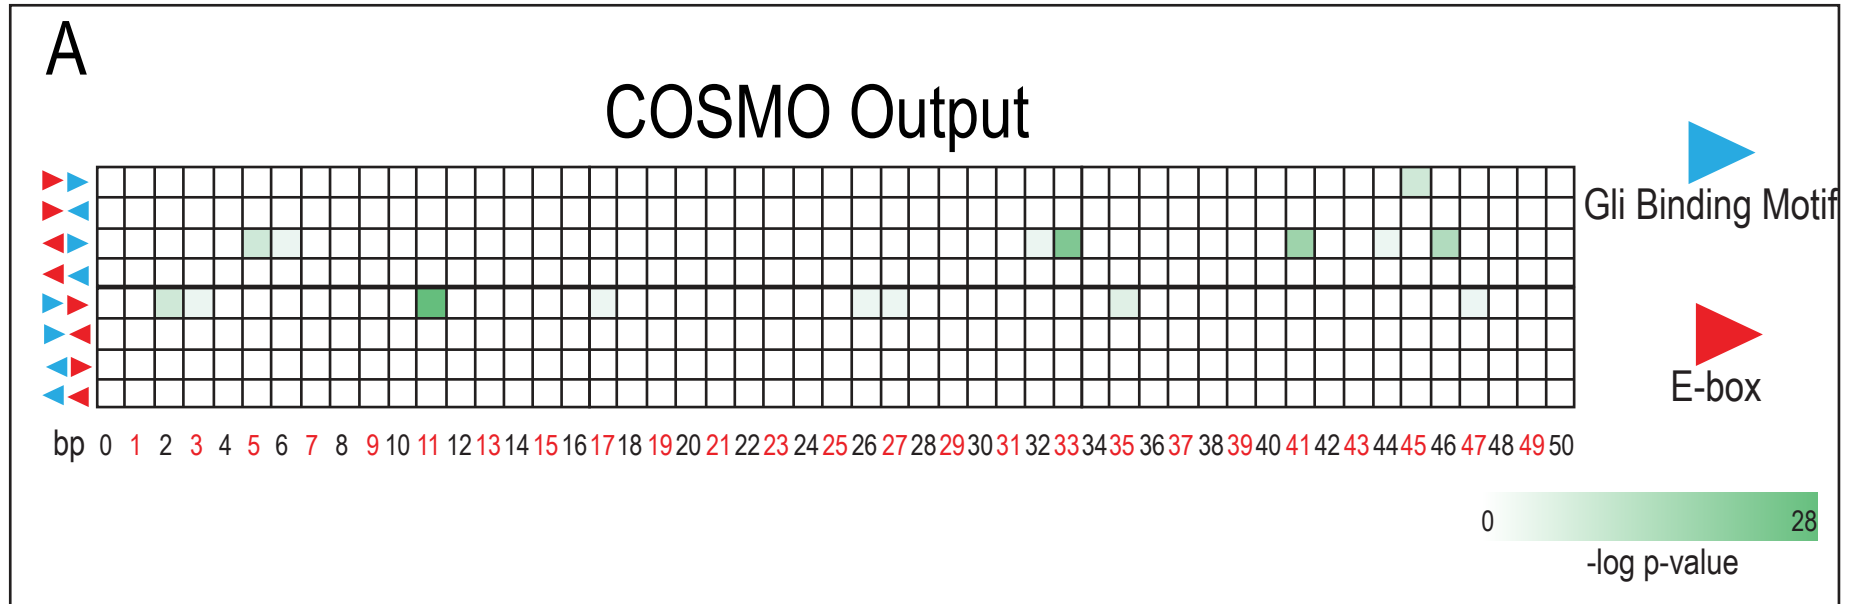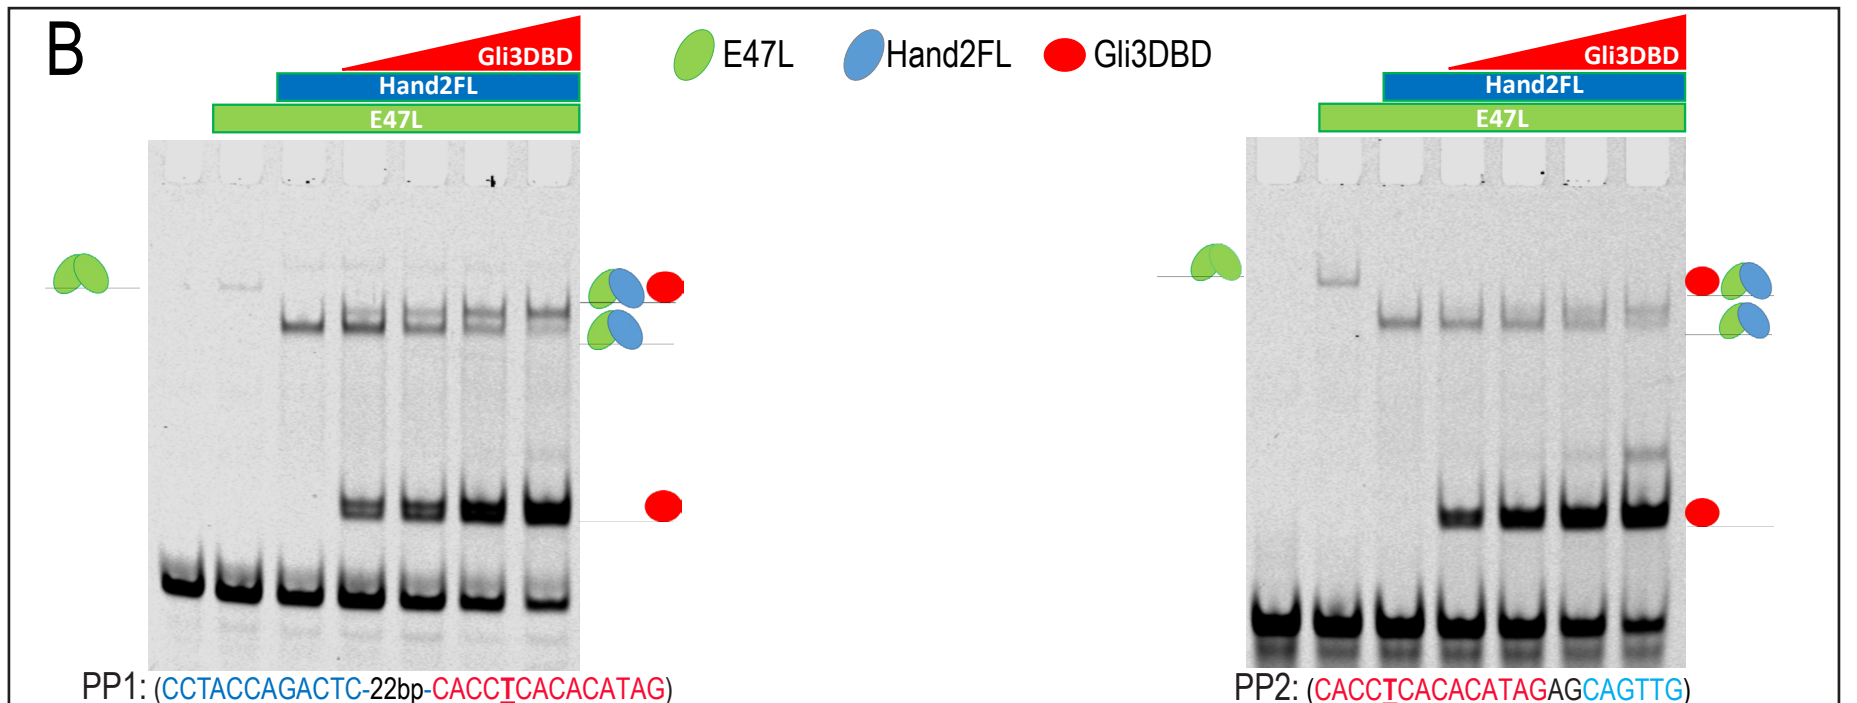

Supplement: supp [file elife-56450-supp-v1.zip]

# Elliott\_Figure 3-figure supplement 1

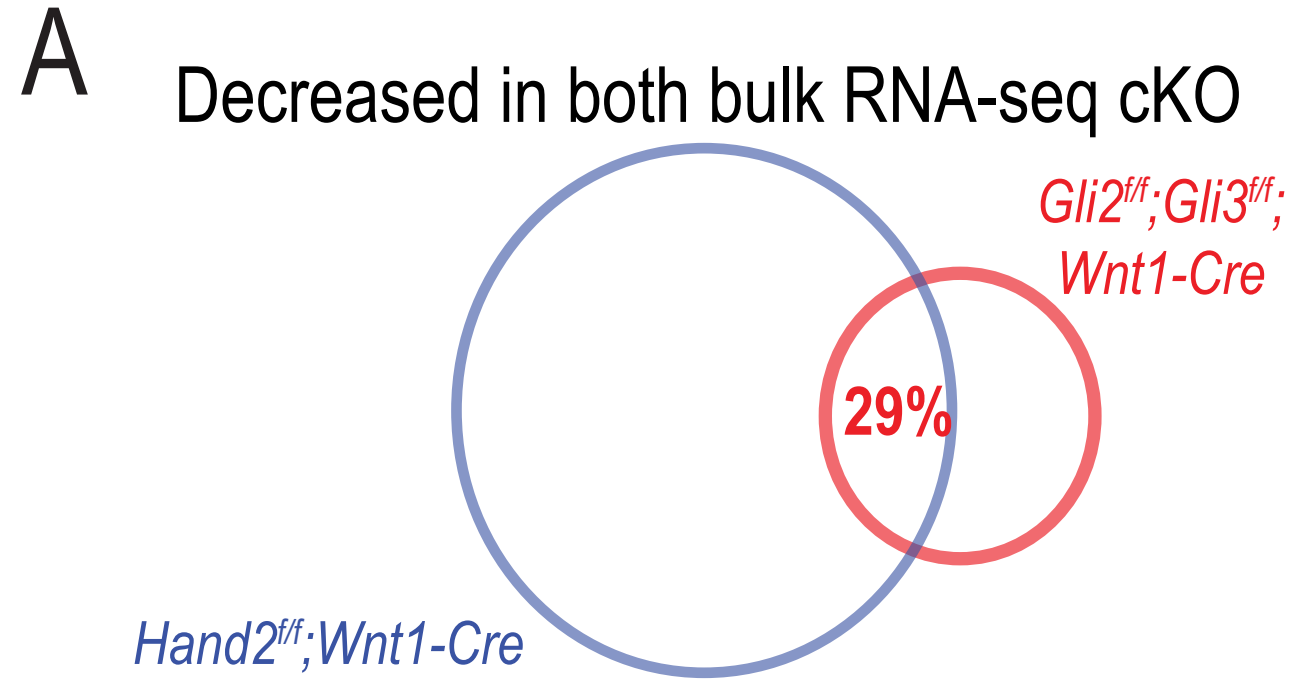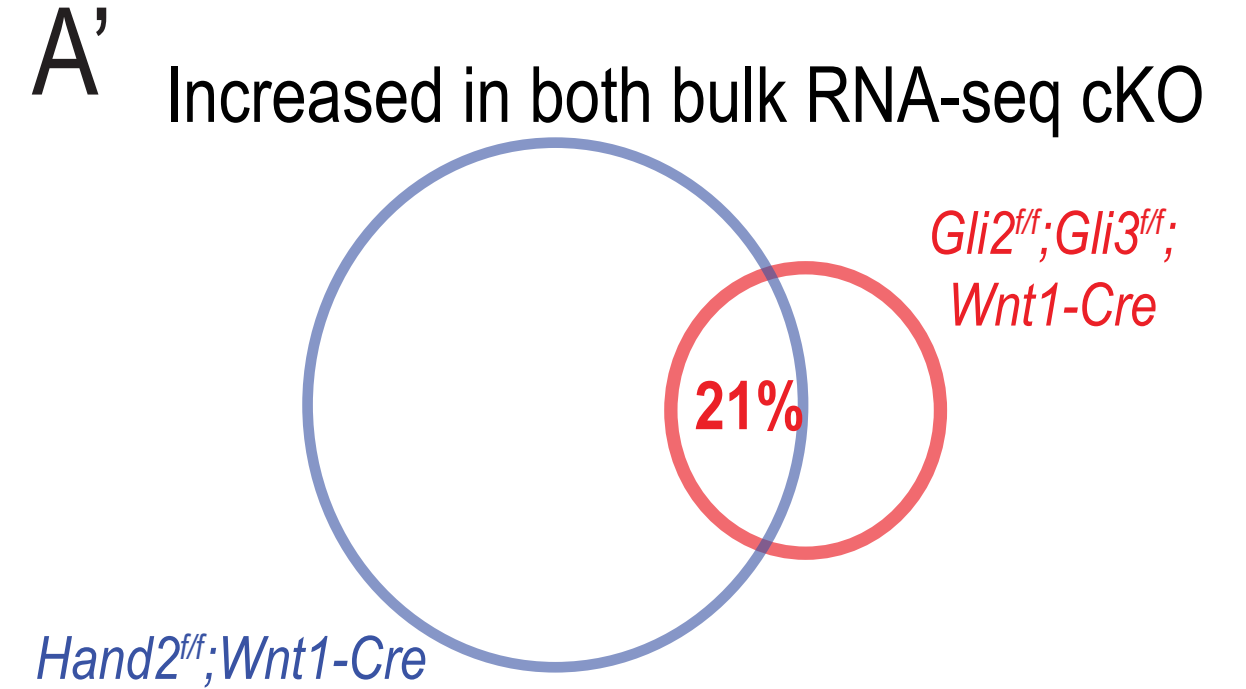

Supplement: supp [file elife-56450-supp-v1.zip]

# Elliott\_Figure 9-figure supplement 1

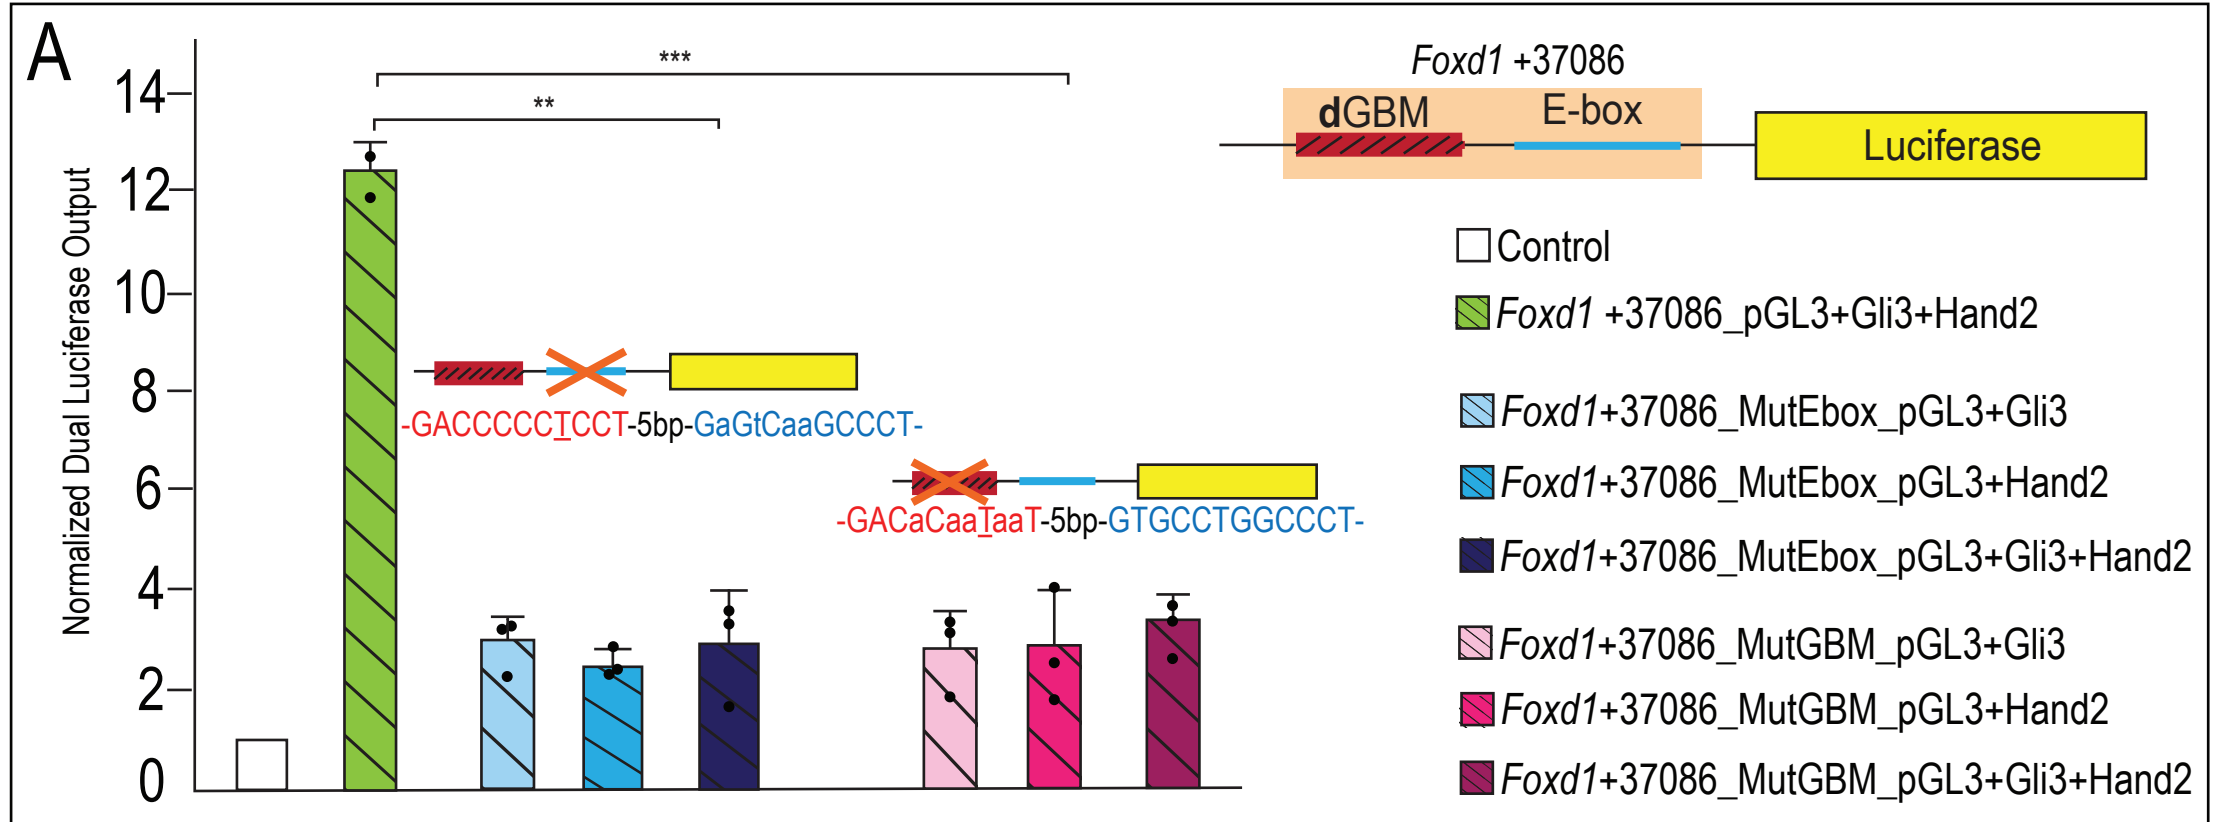

Supplement: supp [file elife-56450-supp-v1.zip]

A

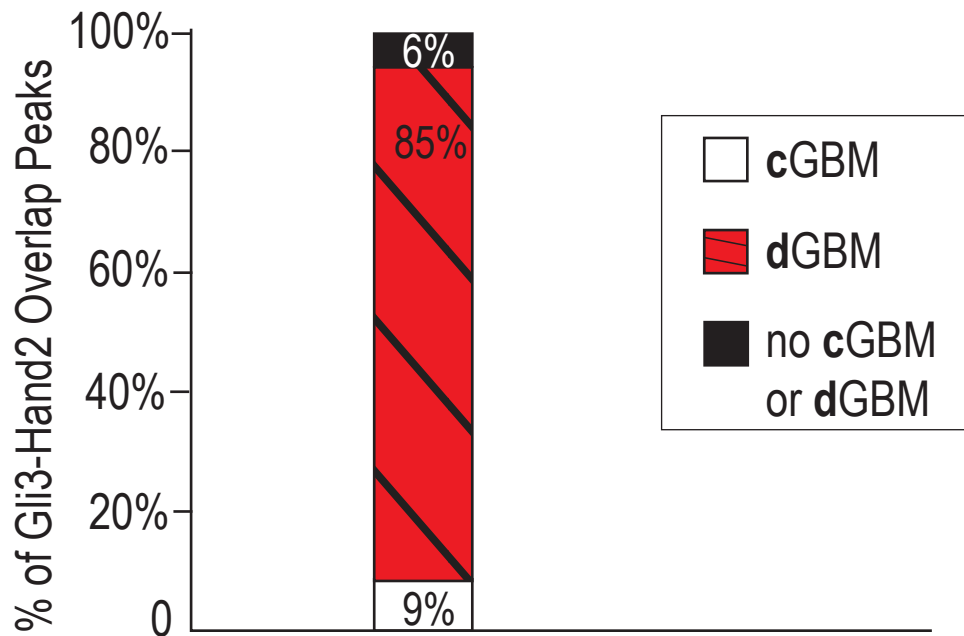

Supplement: supp [file elife-56450-supp-v1.zip]

Elliott\_Figure 4-figure supplement 1

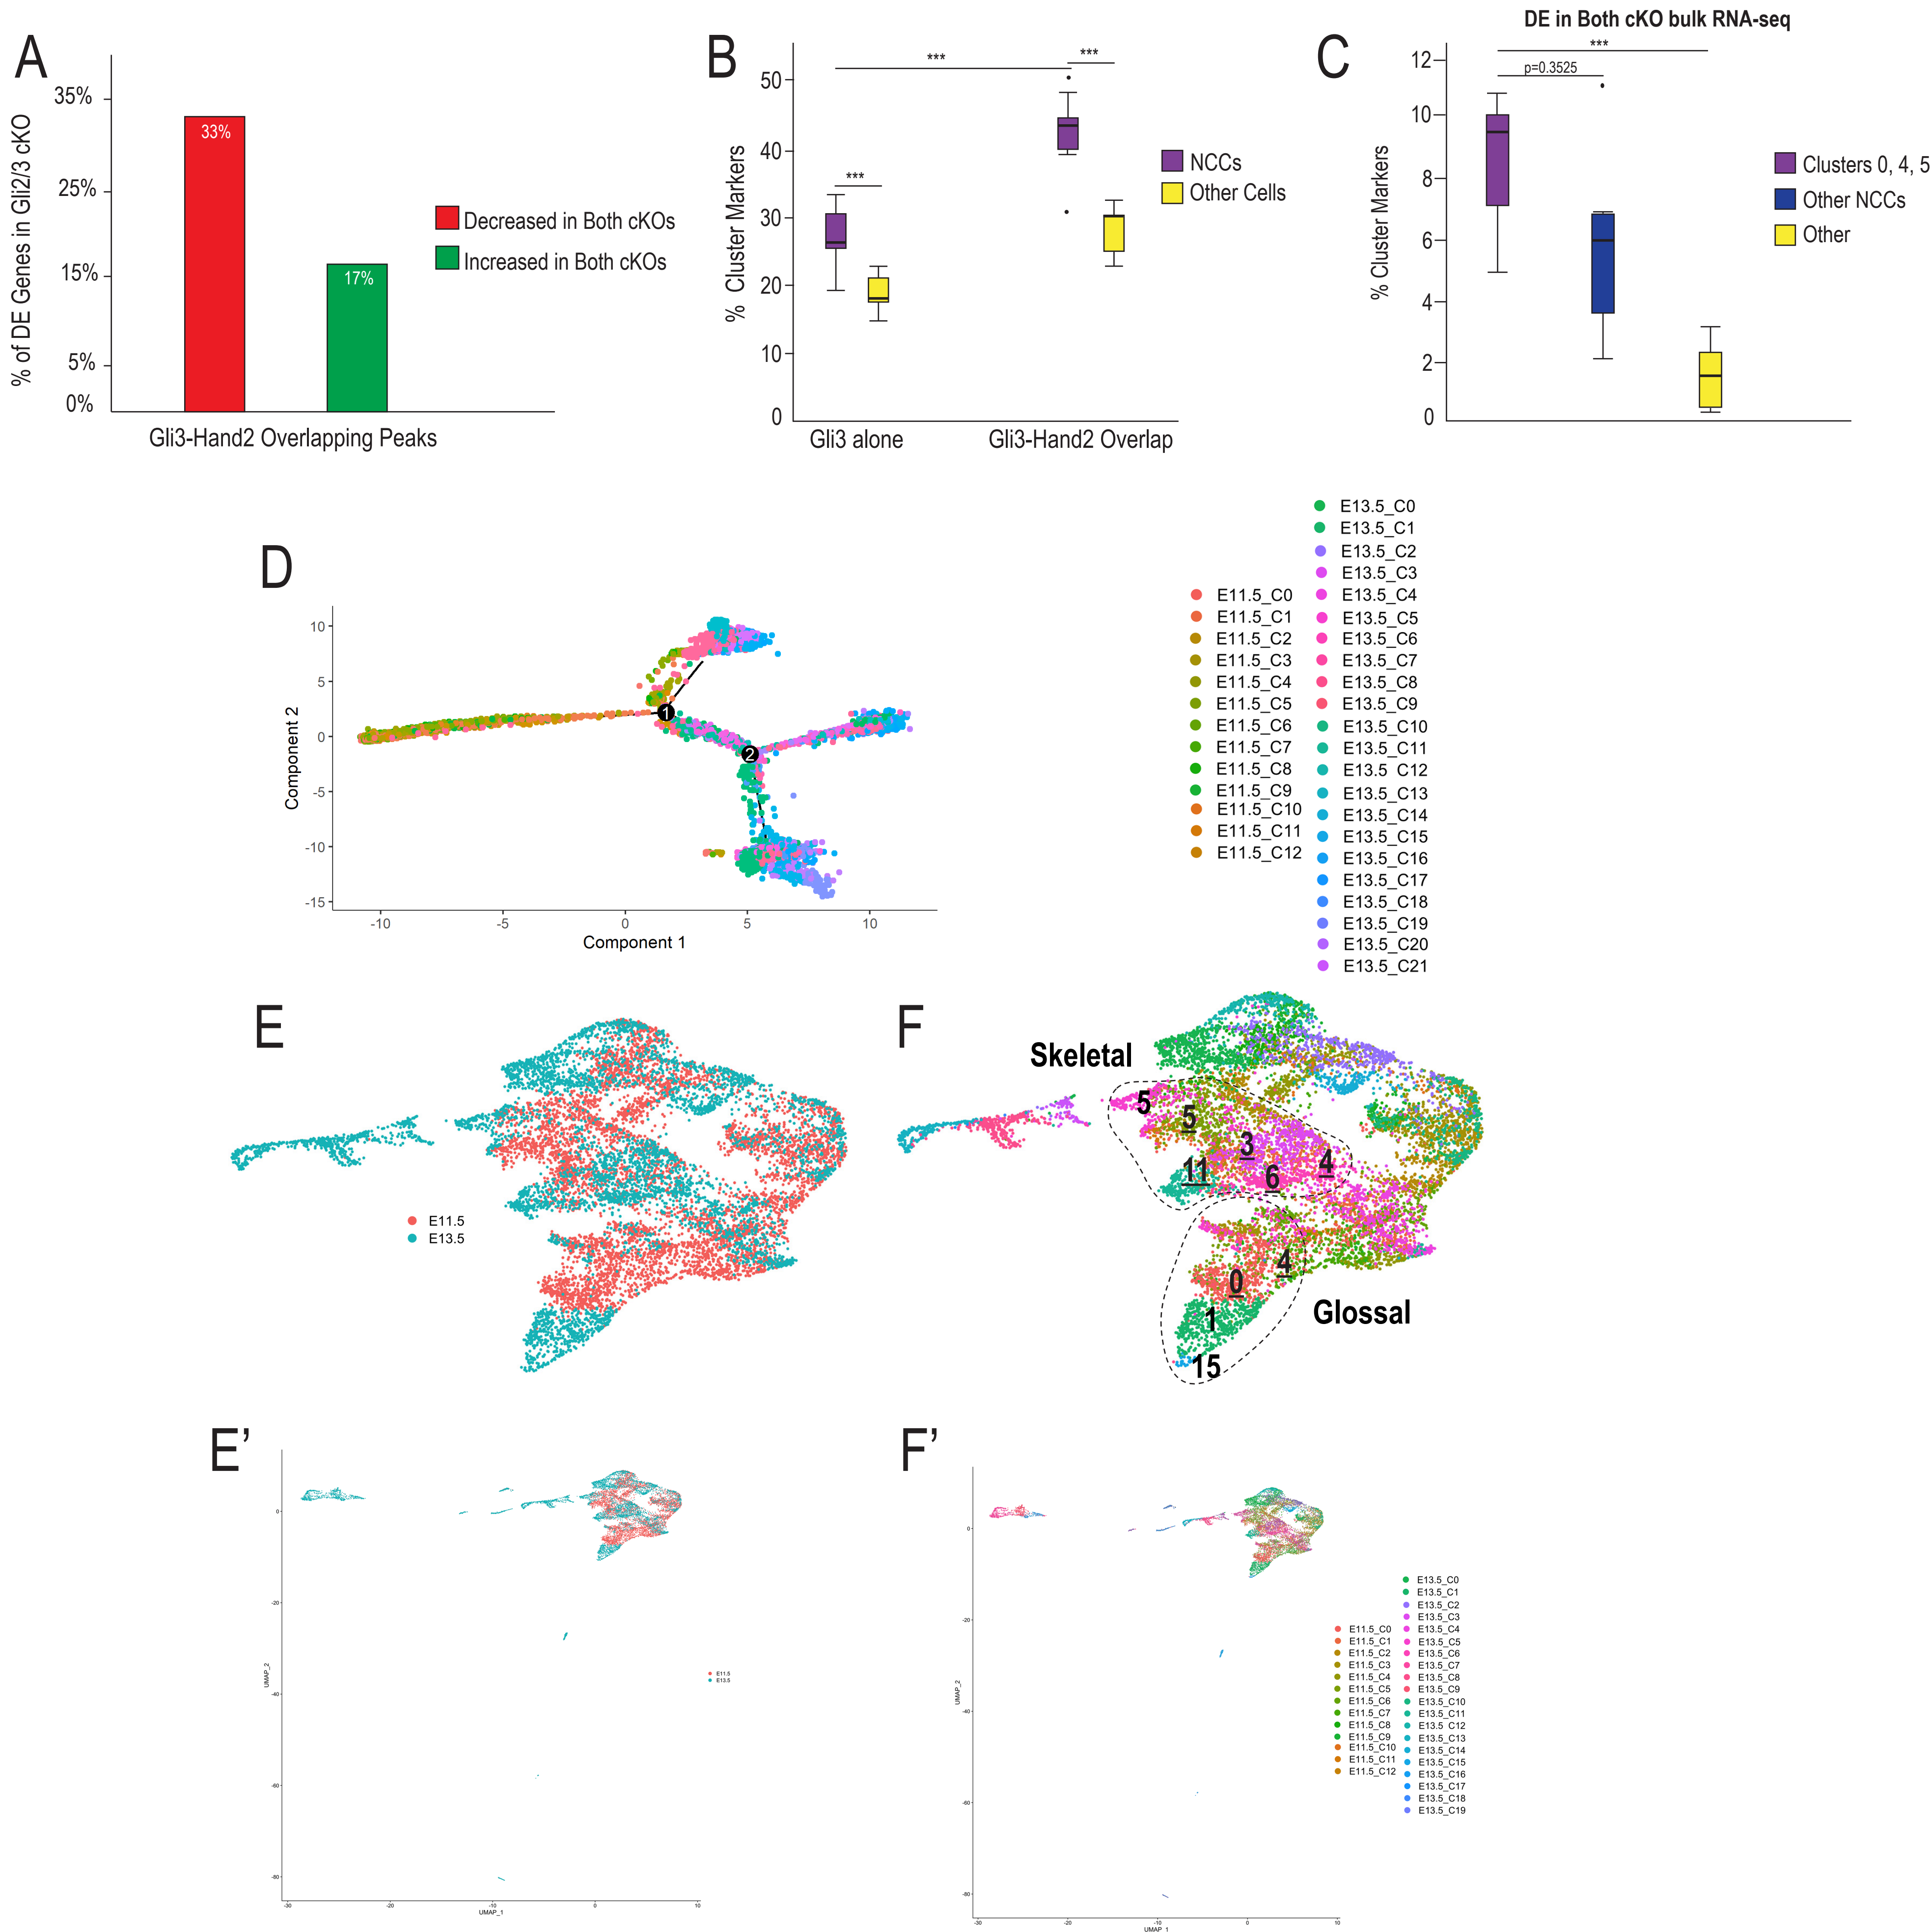

Supplement: supp [file elife-56450-supp-v1.zip]
